# Supplementary material for: Energetics of oxo- and thio-dipeptide formation via amino acid condensation: a systematic computational analysis
Source: Royal Society of Chemistry journal article supplement (doi:10.1039/c4cp02680b), 2014-07-07
Supplement: c4cp02680b1.pdf [file c4cp02680b1.pdf]

# Energetics of oxo- and thio-dipeptides formation via amino acid condensation: a systematic computational analysis

Mauro Torsello, Laura Orian,<sup>\*</sup> Marta De Zotti, Roberta Saini, Fernando Formaggio and Antonino Polimeno

*Dipartimento di Scienze Chimiche, Università degli Studi di Padova, Via Marzolo 1 35131 Padova (Italy)*

<sup>\*</sup>Corresponding author: laura.orian@unipd.it

**Fig. S1** Maps of  $\Delta_r E$  (kcal/mol) calculated at PBE0/6-311G(d,p) level of theory for oxo- and thio-dipeptides (left and right, respectively).

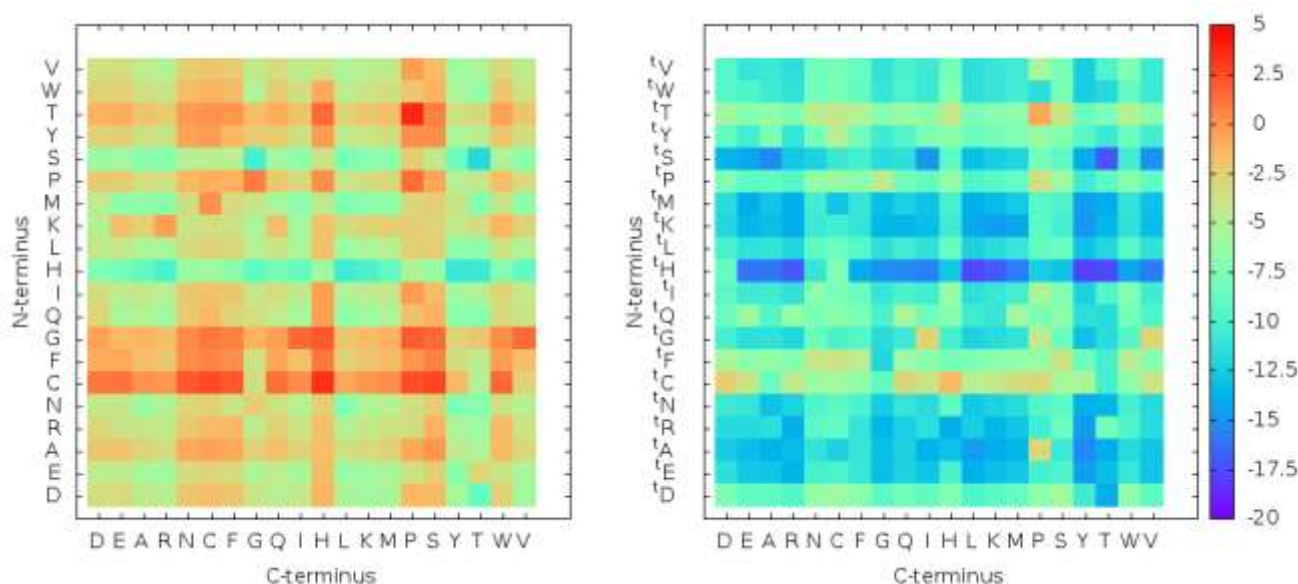

**Fig. S2** Maps of  $\Delta_r E + \text{ZPC}$  calculated at PBE0/6-311G(d,p) level of theory for oxo- and thio-dipeptides (left and right, respectively).

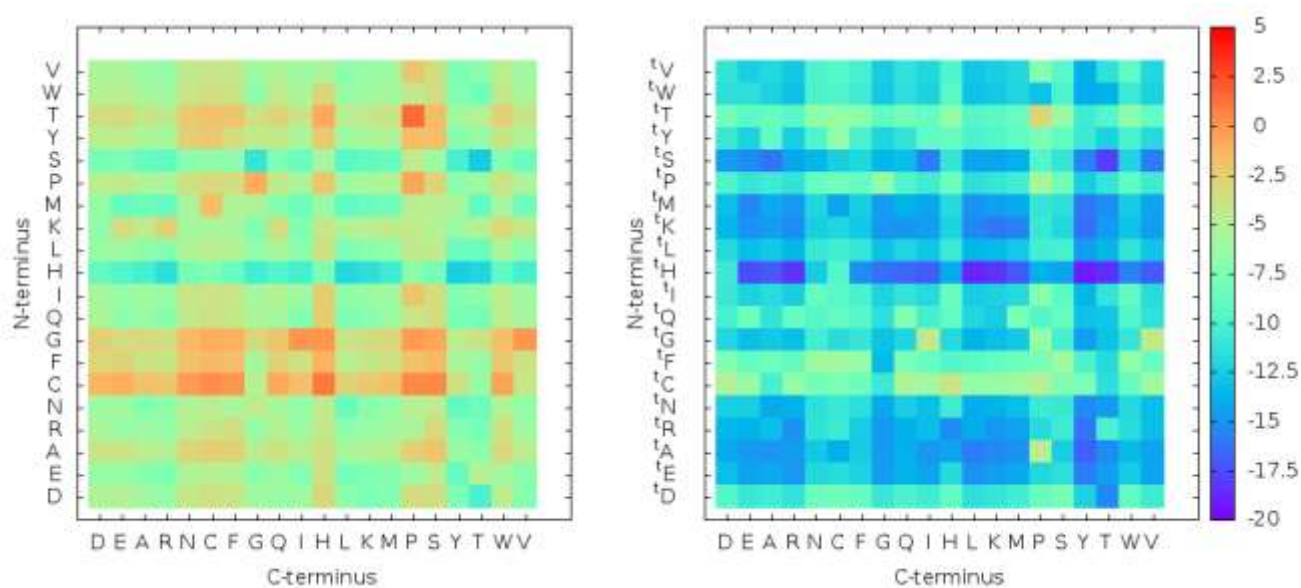

**Fig. S3** Maps of  $\Delta_r G$  calculated at PBE0/6-311G(d,p) level of theory for oxo- and thio-dipeptides (left and right, respectively).

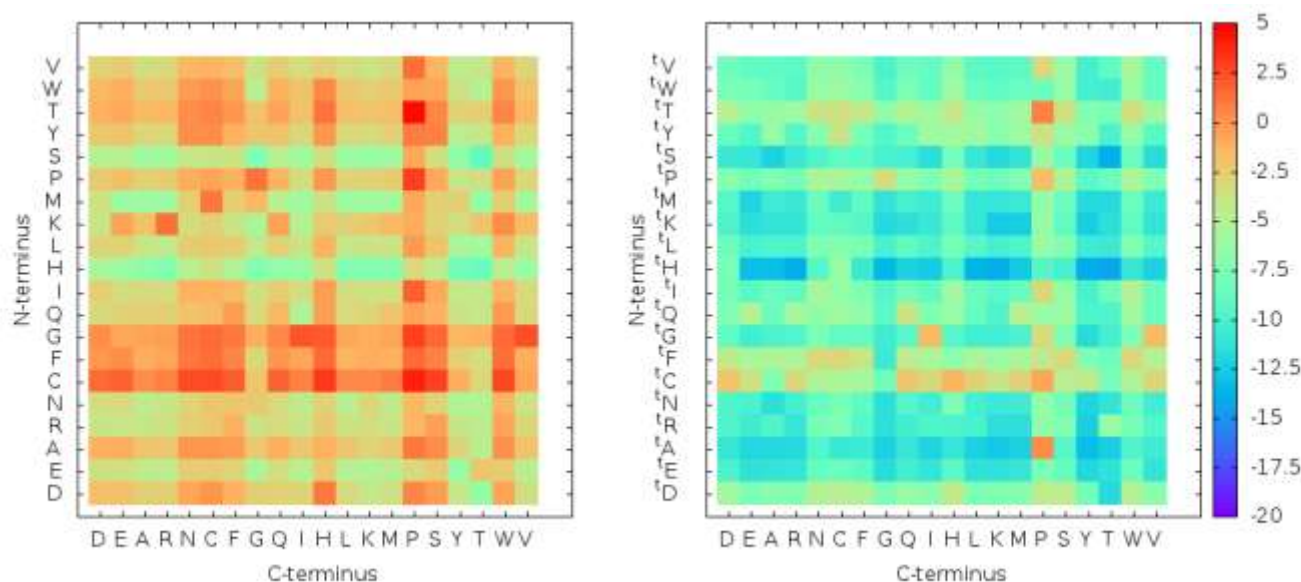

**XYZ coordinates of the 400 oxo-dipeptides  
optimized at PBE0/6-31G(d,p) level of  
theory**

**1  
AspAsp**

|   |           |           |           |
|---|-----------|-----------|-----------|
| N | -3.048858 | -2.922768 | -0.780399 |
| C | -2.711078 | -1.536769 | -0.553117 |
| H | -2.874260 | -0.958737 | -1.470720 |
| C | -3.518773 | -0.864097 | 0.583055  |
| C | -1.229214 | -1.490936 | -0.182315 |
| H | -4.585327 | -0.969073 | 0.346062  |
| H | -3.329367 | -1.371877 | 1.531980  |
| C | -3.246183 | 0.606469  | 0.785938  |
| O | -3.047517 | 1.141882  | 1.848714  |
| O | -0.702292 | -2.393844 | 0.455511  |
| O | -3.271611 | 1.272466  | -0.386730 |
| H | -4.047454 | -3.073402 | -0.698479 |
| H | -2.575041 | -3.482573 | -0.076296 |
| C | -3.051111 | 2.683037  | -0.287323 |
| H | -2.019794 | 2.884560  | 0.008683  |
| H | -3.239001 | 3.080590  | -1.284295 |
| H | -3.734606 | 3.124782  | 0.440701  |
| N | -0.562870 | -0.376430 | -0.559103 |
| H | -1.038592 | 0.382424  | -1.030489 |
| C | 0.790147  | -0.132876 | -0.129984 |
| H | 0.893945  | -0.391513 | 0.930684  |
| C | 1.799328  | -0.990629 | -0.918686 |
| C | 1.056788  | 1.350588  | -0.302070 |
| H | 1.454548  | -2.025541 | -0.819110 |
| H | 1.801148  | -0.719452 | -1.976387 |
| C | 3.217631  | -0.918259 | -0.410942 |
| O | 0.277069  | 2.130948  | -0.803926 |
| O | 4.191225  | -0.712788 | -1.094448 |
| O | 2.263390  | 1.684080  | 0.146438  |
| C | 2.627971  | 3.055626  | -0.030832 |
| H | 3.643151  | 3.141022  | 0.353057  |
| H | 2.593260  | 3.324992  | -1.088483 |
| H | 1.948439  | 3.703913  | 0.526816  |
| O | 3.269304  | -1.152577 | 0.909901  |
| C | 4.575182  | -1.102535 | 1.477962  |
| H | 5.013760  | -0.110410 | 1.343288  |
| H | 4.447597  | -1.323037 | 2.537297  |
| H | 5.229020  | -1.841330 | 1.008398  |

**2  
AspGlu**

|   |           |           |           |
|---|-----------|-----------|-----------|
| N | 2.221871  | -3.587795 | 0.226475  |
| C | 2.348333  | -2.152082 | 0.319069  |
| H | 2.443018  | -1.853447 | 1.370246  |
| C | 3.558700  | -1.569488 | -0.450825 |
| C | 1.071224  | -1.548678 | -0.265661 |
| H | 4.464742  | -2.064896 | -0.078920 |
| H | 3.465454  | -1.784763 | -1.518096 |
| C | 3.763500  | -0.082106 | -0.297212 |
| O | 3.961187  | 0.695406  | -1.198527 |
| O | 0.473656  | -2.089567 | -1.187332 |
| O | 3.719316  | 0.283084  | 1.000436  |
| H | 3.128911  | -4.038099 | 0.259037  |
| H | 1.778312  | -3.808583 | -0.661358 |
| C | 3.936629  | 1.676383  | 1.245647  |
| H | 3.097458  | 2.262848  | 0.866204  |
| H | 4.005457  | 1.776451  | 2.328559  |
| H | 4.861013  | 2.007104  | 0.767580  |
| N | 0.687916  | -0.364122 | 0.261601  |
| H | 1.230835  | 0.084655  | 0.987644  |
| C | -0.406083 | 0.385347  | -0.306679 |
| H | -0.396321 | 0.247188  | -1.394407 |
| C | -1.759812 | -0.114602 | 0.236035  |
| C | -0.156078 | 1.846653  | 0.011290  |
| H | -1.745498 | -1.201618 | 0.124687  |
| H | -1.813729 | 0.103272  | 1.309517  |
| C | -2.978635 | 0.446673  | -0.492412 |
| O | 0.595595  | 2.232671  | 0.880560  |
| H | -3.047856 | 1.532246  | -0.413893 |

|   |           |           |           |
|---|-----------|-----------|-----------|
| H | -2.905330 | 0.202348  | -1.560511 |
| C | -4.288146 | -0.111905 | 0.008159  |
| O | -5.273475 | 0.543299  | 0.252225  |
| O | -0.876010 | 2.657521  | -0.762598 |
| C | -0.718543 | 4.054776  | -0.497023 |
| H | -1.380984 | 4.562772  | -1.196113 |
| H | -0.997458 | 4.282660  | 0.534047  |
| H | 0.318163  | 4.356835  | -0.661035 |
| O | -4.241216 | -1.448861 | 0.132841  |
| C | -5.453233 | -2.054931 | 0.576332  |
| H | -5.246557 | -3.123000 | 0.636633  |
| H | -5.745020 | -1.664422 | 1.554388  |
| H | -6.262667 | -1.860792 | -0.131894 |

**3  
AspAla**

|   |           |           |           |
|---|-----------|-----------|-----------|
| N | -3.345705 | -1.862511 | -0.547276 |
| C | -2.379466 | -0.791459 | -0.465501 |
| H | -2.218302 | -0.358715 | -1.460316 |
| C | -2.783365 | 0.354530  | 0.493581  |
| C | -1.072908 | -1.401979 | 0.042215  |
| H | -3.759203 | 0.738021  | 0.168947  |
| H | -2.887690 | -0.027555 | 1.512011  |
| C | -1.830910 | 1.524224  | 0.535814  |
| O | -1.406341 | 2.046758  | 1.537226  |
| O | -1.073670 | -2.325993 | 0.846093  |
| O | -1.518172 | 1.941927  | -0.707771 |
| H | -4.292565 | -1.501859 | -0.533722 |
| H | -3.214503 | -2.465077 | 0.261246  |
| C | -0.639278 | 3.070015  | -0.763762 |
| H | 0.353259  | 2.794291  | -0.402432 |
| H | -0.591129 | 3.352197  | -1.815220 |
| H | -1.034817 | 3.890634  | -0.161517 |
| N | 0.061001  | -0.821228 | -0.408167 |
| H | 0.024663  | -0.008390 | -1.009481 |
| C | 1.348442  | -1.184912 | 0.132169  |
| H | 1.243083  | -1.337318 | 1.213703  |
| C | 1.901865  | -2.474153 | -0.481214 |
| C | 2.286582  | -0.017025 | -0.092254 |
| H | 2.026854  | -2.364803 | -1.562391 |
| H | 2.865277  | -2.728919 | -0.033811 |
| H | 1.192813  | -3.280930 | -0.286615 |
| O | 2.017683  | 0.965800  | -0.749105 |
| O | 3.459649  | -0.212698 | 0.508330  |
| C | 4.415007  | 0.835821  | 0.335578  |
| H | 5.304821  | 0.515436  | 0.875606  |
| H | 4.638752  | 0.980082  | -0.723880 |
| H | 4.032609  | 1.772356  | 0.748038  |

**4  
AspArg**

|   |           |           |           |
|---|-----------|-----------|-----------|
| N | -3.606565 | -3.201230 | -0.426672 |
| C | -3.350225 | -1.779451 | -0.422041 |
| H | -3.390059 | -1.389754 | -1.446537 |
| C | -4.343642 | -0.960215 | 0.437108  |
| C | -1.943973 | -1.576555 | 0.143981  |
| H | -5.357843 | -1.172820 | 0.075116  |
| H | -4.281874 | -1.271182 | 1.482895  |
| C | -4.153516 | 0.536291  | 0.390037  |
| O | -4.115230 | 1.268461  | 1.348535  |
| O | -1.489360 | -2.324873 | 1.000779  |
| O | -4.050718 | 0.973143  | -0.881612 |
| H | -4.601475 | -3.392833 | -0.436598 |
| H | -3.206623 | -3.593026 | 0.422279  |
| C | -3.889849 | 2.387881  | -1.026002 |
| H | -2.907205 | 2.695531  | -0.662541 |
| H | -3.972637 | 2.585001  | -0.450578 |
| H | -4.668673 | 2.917835  | -0.473695 |
| N | -1.278797 | -0.496244 | -0.318847 |
| H | -1.695395 | 0.118905  | -1.005154 |
| C | -0.006346 | -0.098199 | 0.236363  |
| H | -0.005999 | -0.332200 | 1.306607  |
| C | 1.157854  | -0.853972 | -0.433849 |
| C | 0.107215  | 1.401426  | 0.050471  |
| H | 0.879640  | -1.913394 | -0.388389 |

|   |           |           |           |
|---|-----------|-----------|-----------|
| H | 1.189205  | -0.575427 | -1.495082 |
| C | 2.522977  | -0.649406 | 0.210453  |
| O | -0.512871 | 2.028406  | -0.782704 |
| H | 2.838906  | 0.394979  | 0.142727  |
| H | 2.466792  | -0.905624 | 1.277611  |
| C | 3.589977  | -1.507544 | -0.466075 |
| H | 3.321777  | -2.569451 | -0.407854 |
| H | 3.656443  | -1.238503 | -1.524258 |
| N | 4.919245  | -1.355374 | 0.089948  |
| H | 5.025217  | -1.677962 | 1.041568  |
| C | 5.646066  | -0.216593 | -0.195149 |
| N | 5.206341  | 0.565432  | -1.024060 |
| N | 6.837436  | -0.168974 | 0.529851  |
| H | 5.916741  | 1.359444  | -1.214968 |
| H | 7.302429  | -1.062538 | 0.616600  |
| H | 7.470495  | 0.556038  | 0.227828  |
| O | 0.983346  | 1.946250  | 0.891143  |
| C | 1.195039  | 3.350554  | 0.726405  |
| H | 1.936532  | 3.625156  | 1.475081  |
| H | 1.565914  | 3.565432  | -1.024060 |
| H | 0.263270  | 3.897130  | 0.888625  |

**5  
AspAsn**

|   |           |           |           |
|---|-----------|-----------|-----------|
| N | -2.796034 | -2.828211 | -0.962851 |
| C | -2.446988 | -1.457189 | -0.664398 |
| H | -2.537135 | -0.846147 | -1.570357 |
| C | -3.316795 | -0.809158 | 0.437873  |
| C | -0.991078 | -1.459646 | -0.194945 |
| H | -4.367817 | -0.890882 | 0.131067  |
| H | -3.197562 | -1.349697 | 1.380216  |
| C | -3.045723 | 0.650711  | 0.709510  |
| O | -2.963993 | 1.154632  | 1.802331  |
| O | -0.536794 | -2.395790 | 0.452042  |
| O | -2.930739 | 1.349303  | -0.439142 |
| H | -3.800930 | -2.958774 | -0.946946 |
| H | -2.380723 | -3.418928 | -0.246706 |
| C | -2.699392 | 2.751709  | -0.272901 |
| H | -1.703895 | 2.923740  | 0.140468  |
| H | -2.767984 | 3.181113  | -1.272005 |
| H | -3.452071 | 3.185967  | 0.388256  |
| N | -0.271137 | -0.361599 | -0.512662 |
| H | -0.719101 | 0.430441  | -0.956782 |
| C | 1.054758  | -0.135490 | 0.013072  |
| H | 1.068341  | -0.261323 | 1.106426  |
| C | 2.090313  | -1.123653 | 0.532282  |
| C | 1.400279  | 1.311432  | -0.283615 |
| H | 1.603954  | -2.105703 | -0.546063 |
| H | 2.386527  | -0.874813 | -1.556890 |
| C | 3.292201  | -1.241405 | 0.391391  |
| O | 0.605372  | 2.127741  | -0.700981 |
| O | 3.231941  | -0.995415 | 1.582755  |
| N | 4.432954  | -1.673532 | -0.209197 |
| H | 5.212951  | -1.900965 | 0.385821  |
| H | 4.443794  | -1.992978 | -1.162161 |
| O | 2.677230  | 1.580761  | -0.035187 |
| C | 3.070894  | 2.936920  | -0.250278 |
| H | 4.129177  | 2.977867  | 0.002657  |
| H | 2.910542  | 3.222372  | -1.292592 |
| H | 2.496511  | 3.606857  | 0.393453  |

**6  
AspCys**

|   |           |           |           |
|---|-----------|-----------|-----------|
| N | -2.963195 | -2.719665 | -0.552951 |
| C | -2.437024 | -1.377669 | -0.460081 |
| H | -2.454168 | -0.902743 | -1.448601 |
| C | -3.204730 | -0.459165 | 0.521324  |
| C | -0.990918 | -1.493538 | 0.020182  |
| H | -4.258303 | -0.444500 | 0.213951  |
| H | -3.151773 | -0.862074 | 1.535754  |
| H | -2.730834 | 0.973107  | 0.569340  |
| O | -2.515464 | 1.606449  | 1.573301  |
| O | -0.639758 | -2.383190 | 0.784222  |
| O | -2.593428 | 1.481951  | -0.672319 |
| H | -3.976124 | -2.717146 | -0.529689 |

|        |           |           |           |        |           |           |           |        |           |           |           |
|--------|-----------|-----------|-----------|--------|-----------|-----------|-----------|--------|-----------|-----------|-----------|
| H      | -2.619154 | -3.250248 | 0.243089  | H      | -4.300302 | -1.261268 | -0.643924 | N      | 0.187848  | -0.498213 | 0.296681  |
| C      | -2.176761 | 2.850245  | -0.723777 | H      | -3.311766 | -2.352507 | 0.100471  | H      | 0.598754  | 0.144975  | 0.960611  |
| H      | -1.145074 | 2.945106  | -0.379205 | C      | -1.242428 | 2.971720  | -0.612505 | H      | -1.088426 | -0.133485 | -0.272777 |
| H      | -2.249701 | 3.140047  | -1.771613 | H      | 0.716428  | 2.585921  | -0.260758 | H      | -1.050492 | -0.319944 | -1.352453 |
| H      | -2.828450 | 3.469937  | -0.104454 | H      | -0.156272 | 3.304824  | -1.646485 | C      | -2.245355 | -0.987197 | 0.314080  |
| N      | -0.150324 | -0.525414 | -0.411884 | H      | -0.567202 | 3.791351  | 0.031773  | C      | -1.264910 | 1.352873  | -0.036302 |
| H      | -0.476911 | 0.224512  | -1.008225 | N      | 0.093291  | -0.957156 | -0.478637 | H      | -1.870361 | -2.014631 | 0.216763  |
| C      | 1.193426  | -0.417281 | 0.098374  | H      | 0.129254  | -0.111849 | -0.032961 | C      | -2.467679 | -0.936663 | 1.792942  |
| H      | 1.198640  | -0.623966 | 1.175018  | C      | 1.333935  | -1.451465 | 0.045276  | C      | -3.525131 | -0.887535 | -0.521048 |
| C      | 2.102754  | -1.449450 | -0.591013 | C      | 2.413490  | -0.419742 | -0.160460 | O      | -0.626475 | 1.993423  | 0.772373  |
| C      | 1.647857  | 1.011266  | -0.138685 | H      | 1.234237  | -1.681098 | 1.112272  | H      | -2.908346 | 0.307432  | 1.939358  |
| H      | 1.625290  | -2.417426 | -0.430791 | H      | 1.647521  | -2.386420 | -0.438426 | H      | -3.142984 | -1.416717 | 2.245708  |
| H      | 2.142049  | -1.242160 | -1.664350 | O      | 2.252864  | 0.639625  | -0.725548 | H      | -1.525856 | -0.723036 | 2.348464  |
| S      | 3.788755  | -1.507389 | 0.117546  | O      | 3.573863  | -0.832977 | 0.345815  | H      | -3.957325 | 0.115255  | -0.423180 |
| O      | 1.068392  | 1.797893  | -0.856468 | C      | 4.664342  | 0.078130  | 0.192084  | H      | -3.261397 | -1.002072 | -1.580310 |
| H      | 3.990877  | -2.807373 | -0.157364 | H      | 4.446776  | 1.022855  | 0.695528  | C      | -4.569062 | -0.686663 | -0.154781 |
| O      | 2.767809  | 1.281296  | 0.520740  | H      | 5.522922  | -0.410602 | 0.650211  | H      | -4.939748 | -1.807590 | 0.866853  |
| C      | 3.314009  | 2.585638  | 0.307088  | H      | 4.852802  | 0.274778  | -0.865835 | H      | -5.432592 | -1.876447 | -0.824041 |
| H      | 4.230229  | 2.617904  | 0.893915  |        |           |           |           | H      | -4.157178 | -2.948646 | -0.234609 |
| H      | 3.529061  | 2.739953  | -0.752454 | 9      |           |           |           | O      | -2.216512 | 1.877212  | -0.807790 |
| H      | 2.610970  | 3.349846  | 0.645788  | AspGln |           |           |           | C      | -2.452859 | 3.274214  | -0.617770 |
| 7      |           |           |           | N      | 2.653860  | -3.370404 | 0.200972  | H      | -3.259864 | 3.531615  | -1.302217 |
| AspPhe |           |           |           | C      | 2.406099  | -1.945408 | 0.311919  | H      | -2.743292 | 3.478115  | 0.415358  |
| N      | -3.298981 | -3.096492 | -0.611029 | H      | 2.471830  | -1.651721 | 1.364941  | H      | -1.553193 | 3.847486  | -0.852802 |
| C      | -3.015451 | -1.685890 | -0.485623 | C      | 3.499344  | -1.193703 | -0.462700 |        |           |           |           |
| H      | -3.190723 | -1.183461 | -1.444861 | C      | 1.026488  | -1.561651 | -0.244431 | 11     |           |           |           |
| C      | -3.861068 | -0.961725 | 0.590312  | H      | 4.462166  | -1.596558 | -0.127222 | AspHis |           |           |           |
| C      | -1.540461 | -1.552541 | -0.107402 | H      | 3.420004  | -1.395565 | -1.534421 | N      | 3.470751  | -2.950170 | -0.127083 |
| H      | -4.920098 | -1.128323 | 0.354697  | C      | 3.541636  | 0.303642  | -0.288444 | C      | 2.898708  | -1.669190 | 0.209339  |
| H      | -3.660799 | -1.386929 | 1.576893  | O      | 3.822243  | 1.095479  | -1.154308 | H      | 2.913466  | -1.529469 | 1.297535  |
| C      | -3.650694 | 0.530223  | 0.680999  | O      | 0.462401  | -2.261527 | -1.078169 | C      | 3.620539  | -0.458161 | -0.438260 |
| O      | -3.479236 | 1.153222  | 1.699890  | O      | 3.276453  | 0.667186  | 0.984710  | C      | 1.456305  | -1.666561 | -0.294493 |
| O      | -0.975371 | -2.401278 | 0.571956  | H      | 2.083072  | -3.855764 | 0.886854  | H      | 4.672351  | -0.488822 | -0.128284 |
| O      | -3.700079 | 1.102814  | -0.539328 | H      | 2.279602  | -3.664564 | -0.700306 | H      | 3.574352  | -0.539769 | -1.526720 |
| H      | -4.289286 | -3.281362 | -0.503653 | C      | 3.365036  | 2.072452  | 1.242213  | C      | 3.067583  | 0.891959  | -0.052025 |
| H      | -2.792795 | -3.585702 | 0.122609  | H      | 2.570550  | 2.604405  | 0.715759  | O      | 2.703739  | 1.747762  | -0.823995 |
| C      | -3.534766 | 2.524639  | -0.050692 | H      | 3.239521  | 2.181635  | 2.319046  | O      | 1.147678  | -2.227573 | -1.333208 |
| H      | -2.506049 | 2.787848  | -0.295227 | H      | 4.337008  | 2.455831  | 0.925031  | O      | 3.034634  | 1.037086  | 1.286095  |
| H      | -3.759380 | 2.838043  | -1.569931 | N      | 0.500492  | -0.403159 | 0.212912  | H      | 4.483163  | -2.910623 | -0.131620 |
| H      | -4.220302 | 2.993489  | 0.158129  | H      | 1.015594  | 0.181820  | 0.858650  | H      | 3.149008  | -3.206657 | -1.056745 |
| N      | -0.930848 | -0.417827 | -0.516282 | C      | -0.728707 | 0.124694  | -0.328924 | C      | 2.573941  | 2.312637  | 1.751233  |
| H      | -1.424846 | 0.278171  | -1.059135 | H      | -0.749578 | -0.080586 | -1.406258 | H      | 1.522802  | 2.456229  | 1.492152  |
| C      | 0.411234  | -0.102504 | -0.095686 | C      | -1.958807 | -0.537179 | 0.324179  | H      | 2.704048  | 2.292026  | 2.832990  |
| H      | 0.549715  | -0.450638 | 0.932709  | C      | -0.700743 | 1.624638  | -0.111298 | H      | 3.172157  | 3.113124  | 1.310245  |
| C      | 1.459016  | -0.806805 | -0.994838 | H      | -1.733100 | -1.606768 | 0.368012  | N      | 0.582918  | -0.950738 | 0.464069  |
| C      | 0.557904  | 1.403958  | -0.142241 | H      | -2.076333 | -0.190846 | 1.355758  | H      | 0.938670  | -0.445701 | 1.264508  |
| H      | 1.133808  | -1.850823 | -1.047603 | C      | -3.265732 | -0.334231 | -0.428612 | C      | -0.726822 | -0.567638 | -0.025811 |
| H      | 1.389661  | -0.389199 | -2.005402 | O      | 0.052442  | 2.188716  | 0.651844  | H      | -0.841357 | -1.033920 | -1.006717 |
| C      | 2.870420  | -0.737039 | -0.479293 | H      | -3.442817 | 0.732065  | -0.612321 | C      | -1.829460 | -1.014576 | 0.931686  |
| O      | -0.131545 | 2.128078  | -0.830536 | H      | -3.220856 | -0.817090 | -1.412454 | C      | -0.702641 | 0.950491  | -0.156140 |
| C      | 3.827519  | 0.077237  | -1.086888 | C      | -4.446275 | -0.849738 | 0.378998  | H      | -1.719369 | -2.095888 | 1.083722  |
| C      | 3.244911  | -1.496991 | 0.633105  | O      | -4.473653 | -0.811835 | 1.597455  | H      | -1.651430 | -0.528998 | 1.900608  |
| H      | 3.551792  | 0.666190  | -1.959024 | N      | -5.490245 | -1.314630 | -0.356996 | C      | -3.192347 | -0.672130 | 0.430658  |
| C      | 5.128758  | 0.136061  | -0.595408 | H      | -6.295431 | -1.665698 | 0.135048  | O      | -0.577921 | 1.681955  | 0.803992  |
| C      | 4.542536  | -1.437748 | 1.128993  | H      | -5.441282 | -1.421667 | -1.354608 | N      | -4.307770 | -0.723719 | 1.234025  |
| H      | 2.509577  | -2.144667 | 1.105992  | O      | -1.620045 | 2.256452  | -0.844506 | C      | -3.675079 | -0.280436 | -0.795126 |
| H      | 5.862852  | 0.770477  | -1.084304 | C      | -1.676789 | 3.673658  | -0.656330 | H      | -4.321634 | -0.970564 | 2.210147  |
| C      | 5.489077  | -0.619829 | 0.515938  | H      | -2.466980 | 4.026646  | -1.317381 | C      | -5.380492 | -0.370837 | 0.474715  |
| H      | 4.818137  | -2.036684 | 1.992386  | H      | -1.908878 | 3.912660  | 0.383849  | N      | -5.033869 | -0.094966 | -0.757013 |
| H      | 6.504263  | -0.577137 | 0.899782  | H      | -0.720869 | 4.130293  | -0.921816 | H      | -3.112709 | -0.113600 | -1.703577 |
| O      | 1.546732  | 1.829594  | 0.635110  |        |           |           |           | H      | -6.384450 | -0.332396 | 0.875584  |
| C      | 1.798132  | 3.235464  | 0.595348  | 10     |           |           |           | O      | -0.757004 | 1.355261  | -1.417518 |
| H      | 2.646554  | 3.399975  | 1.257604  | AspIle |           |           |           | C      | -0.586807 | 2.763649  | -1.618017 |
| H      | 2.036947  | 3.553797  | -0.421957 | N      | 2.634827  | -3.092856 | 0.348420  | H      | -0.751306 | 2.928857  | -2.681631 |
| H      | 0.923349  | 3.788666  | 0.944994  | C      | 2.321840  | -1.682507 | 0.354082  | H      | -1.310905 | 3.323133  | -1.022488 |
| 8      |           |           |           | H      | 2.357581  | -1.296722 | 1.380150  | H      | 0.429371  | 3.049027  | -1.337176 |
| AspGly |           |           |           | C      | 3.271052  | -0.819872 | -0.512875 |        |           |           |           |
| N      | -3.386837 | -1.698725 | -0.674735 | C      | 0.903326  | -1.533713 | -0.196763 | 12     |           |           |           |
| C      | -2.334863 | -0.718379 | -0.535234 | H      | 4.297175  | -0.993460 | -0.164178 | AspLeu |           |           |           |
| H      | -2.131533 | -0.250472 | -1.506109 | H      | 3.208329  | -1.128516 | -1.559255 | N      | -2.697143 | -3.132476 | -0.323800 |
| C      | -2.647823 | 0.407032  | 0.480452  | C      | 3.021724  | 0.667398  | -0.455304 | C      | -2.395296 | -1.720287 | -0.361801 |
| C      | -1.088093 | -1.461998 | -0.056954 | O      | 2.936602  | 1.401846  | -1.409052 | H      | -2.485617 | -1.347317 | -1.389380 |
| H      | -3.581919 | 0.892498  | 0.169886  | O      | 0.478318  | -2.283871 | -1.066564 | C      | -3.306791 | -0.852881 | 0.540197  |
| H      | -2.797878 | -0.017180 | 1.476245  | O      | 2.923285  | 1.094440  | 0.820093  | C      | -0.952249 | -1.553795 | 0.115567  |
| C      | -1.595975 | 1.483276  | 0.593105  | H      | 3.636644  | -3.244434 | 0.356570  | H      | -4.347580 | -1.037386 | 0.244656  |
| O      | -1.146123 | 1.918203  | 1.624734  | H      | 2.250751  | -3.494910 | -0.502977 | H      | -3.190677 | -1.147401 | 1.586101  |
| O      | -1.166583 | -2.420659 | 0.698947  | C      | 2.717578  | 2.502422  | 0.973131  | C      | -3.070860 | 0.635102  | 0.451361  |
| O      | -1.221990 | 1.928169  | -0.624306 | H      | 1.726770  | 2.781997  | 0.609758  | O      | -2.942585 | 1.382448  | 1.390124  |
|        |           |           |           | H      | 2.793146  | 2.695139  | 2.043009  | O      | -0.472085 | -2.299219 | 0.960278  |
|        |           |           |           | H      | 3.480424  | 3.059935  | 0.425535  | O      | -3.041174 | 1.046150  | -0.832783 |

|        |           |           |           |        |           |           |           |        |           |           |           |
|--------|-----------|-----------|-----------|--------|-----------|-----------|-----------|--------|-----------|-----------|-----------|
| H      | -3.696389 | -3.291084 | -0.269833 | C      | 2.526182  | -1.948609 | 0.273853  | N      | -3.274111 | -2.250794 | -0.240660 |
| H      | -2.258778 | -3.523814 | 0.506126  | H      | 2.620101  | -1.669933 | 1.328903  | C      | -2.446638 | -1.069290 | -0.315021 |
| C      | -2.851467 | 2.452910  | -1.014618 | C      | 3.588612  | -1.173987 | -0.520972 | H      | -2.393361 | -0.717222 | -1.352603 |
| H      | -1.842270 | 2.740979  | -0.713155 | C      | 1.127051  | -1.570356 | -0.235607 | C      | -2.940121 | 0.108264  | 0.559819  |
| H      | -2.990817 | 2.632243  | -2.080472 | H      | 4.564627  | -1.573251 | -0.221195 | C      | -1.047153 | -1.467469 | 0.155685  |
| H      | -3.583378 | 3.014270  | -0.430023 | H      | 3.479030  | -1.359452 | -1.592992 | H      | -3.975778 | 0.330683  | 0.271685  |
| N      | -0.280631 | -0.505004 | -0.408676 | C      | 3.624054  | 0.320641  | -0.324166 | H      | -2.935497 | -0.176175 | 1.615009  |
| H      | -0.718303 | 0.109346  | -0.082124 | O      | 3.875757  | 1.128109  | -1.184299 | C      | -2.154848 | 1.390543  | 0.426193  |
| C      | 1.032013  | -0.136582 | 0.070112  | O      | 0.542484  | -2.264572 | -1.058594 | O      | -1.774709 | 2.077141  | 1.342488  |
| H      | 1.088368  | -0.392970 | 1.132260  | O      | 3.389876  | 0.662801  | 0.961383  | O      | -0.880288 | -2.339607 | 0.996877  |
| C      | 2.130181  | -0.901788 | -0.695898 | H      | 2.236775  | -3.871332 | 0.825859  | O      | -1.944405 | 1.700898  | -0.869812 |
| C      | 1.161529  | 1.363138  | -0.094714 | H      | 2.390667  | -3.653196 | -0.762321 | H      | -4.255707 | -2.006876 | -0.182678 |
| H      | 1.865082  | -1.962058 | -0.601109 | C      | 3.478597  | 2.064442  | 1.238161  | H      | -3.014235 | -2.765763 | 0.596650  |
| H      | 2.040598  | -0.645112 | -1.759410 | H      | 2.667833  | 2.600463  | 0.741411  | C      | -1.233367 | 2.923415  | -1.093622 |
| C      | 3.576765  | -0.706100 | -0.232212 | H      | 3.381885  | 2.156452  | 2.319578  | H      | -0.193308 | 2.819655  | -0.777294 |
| O      | 0.523545  | 2.016249  | -0.892897 | H      | 4.439778  | 2.457699  | 0.900887  | H      | -1.282673 | 3.098529  | -0.168039 |
| H      | 3.848121  | 0.350406  | -0.361964 | N      | 0.606188  | -0.420079 | 0.251607  | H      | -1.704071 | 3.742752  | -0.546471 |
| C      | 3.766351  | -1.064580 | 1.240437  | H      | 1.138706  | 0.162139  | 0.885738  | N      | -0.029812 | -0.752803 | -0.380374 |
| C      | 4.503112  | -1.540314 | -1.115561 | C      | -0.638213 | 0.109418  | -0.251169 | H      | -0.210696 | -0.018848 | -1.052664 |
| H      | 3.419268  | -2.084917 | 1.441428  | H      | -0.702977 | -0.107361 | -1.323985 | C      | 1.328274  | -0.897175 | 0.082897  |
| H      | 4.824040  | -1.010643 | 1.515226  | C      | -1.844933 | -0.547457 | 0.452208  | H      | 1.322181  | -1.220585 | 1.126762  |
| H      | 3.220394  | -0.384252 | 1.900156  | C      | -0.597346 | 1.611304  | -0.048036 | C      | 2.058150  | -1.951669 | -0.757097 |
| H      | 4.388377  | -1.285104 | -2.174484 | H      | -1.651879 | -1.624348 | 0.421786  | C      | 2.006744  | 0.452741  | -0.045160 |
| H      | 5.551856  | -1.383559 | -0.843636 | H      | -1.855291 | -0.244543 | 1.505948  | H      | 1.517154  | -2.897912 | -0.617206 |
| H      | 4.287248  | -2.609553 | -1.005186 | H      | -3.189743 | -0.262838 | -0.201731 | H      | 1.977453  | 0.648001  | -1.816605 |
| O      | 2.077897  | 1.881026  | 0.723351  | O      | 0.152244  | 2.172961  | 0.720858  | O      | 3.393890  | -2.020063 | -0.324125 |
| C      | 2.280914  | 3.290665  | 0.596985  | H      | -3.419477 | 0.806590  | -0.191505 | O      | 1.733390  | 1.249551  | -0.919562 |
| H      | 3.060420  | 3.541131  | 1.314981  | H      | -3.174774 | -0.595654 | -1.246352 | H      | 3.819897  | -2.749370 | -0.782932 |
| H      | 2.595470  | 3.543999  | -0.417978 | S      | -4.492594 | -1.161350 | 0.693043  | O      | 2.926425  | 0.648017  | 0.889277  |
| H      | 1.359005  | 3.828989  | 0.828144  | C      | -5.925390 | -0.650677 | -0.282668 | C      | 3.649046  | 1.875962  | 0.786329  |
| 13     |           |           |           | H      | -5.837548 | -0.979975 | -1.321744 | H      | 4.370459  | 1.861462  | 1.601832  |
| AspLys |           |           |           | H      | -6.802370 | -1.127187 | 0.160660  | H      | 4.159018  | 1.939040  | -0.177589 |
| N      | 2.789698  | -3.445669 | 0.124266  | H      | -6.064512 | 0.433645  | -0.250988 | H      | 2.971672  | 2.727188  | 0.888087  |
| C      | 2.563897  | -2.021481 | 0.281657  | O      | -1.497078 | 2.243943  | -0.801928 | 17     |           |           |           |
| H      | 2.639096  | -1.761764 | 1.343077  | C      | -1.534764 | 3.664872  | -0.639724 | AspTyr |           |           |           |
| C      | 3.664796  | -1.261924 | -0.474428 | H      | -2.315836 | 4.016876  | -1.311967 | N      | -3.583978 | -3.138052 | -0.564484 |
| C      | 1.187013  | -1.600186 | -0.255708 | H      | -1.768574 | 3.926782  | 0.394605  | C      | -3.319950 | -1.722946 | -0.446161 |
| H      | 4.623129  | -1.689657 | -0.157397 | H      | -0.570884 | 4.102818  | -0.908096 | H      | -3.523635 | -1.224460 | -1.401833 |
| H      | 3.576809  | -1.427958 | -1.551592 | 15     |           |           |           | C      | -4.154116 | -1.011427 | 0.646853  |
| C      | 3.730664  | 0.228209  | -0.253030 | AspPro |           |           |           | C      | -1.839264 | -1.566291 | -0.099652 |
| O      | 4.016091  | 1.043445  | -1.095203 | N      | -0.438077 | -2.371180 | 1.525124  | H      | -5.215117 | -1.195624 | 0.434120  |
| O      | 0.605784  | -2.270893 | -1.100705 | C      | -0.848682 | -1.265033 | 0.667131  | H      | -3.926247 | -1.432244 | 1.629336  |
| O      | 3.480685  | 0.555247  | 1.033574  | H      | -0.325453 | -1.368623 | -0.287335 | C      | -3.966952 | 0.483886  | 0.732276  |
| H      | 2.214982  | -3.943902 | 0.797552  | C      | -2.349081 | -1.374652 | 0.420251  | O      | -3.788754 | 1.111035  | 1.747458  |
| H      | 2.404144  | -3.704574 | -0.783172 | C      | -0.543382 | 0.075885  | 1.345160  | O      | -1.246867 | -2.406131 | 0.567245  |
| C      | 3.589537  | 1.950523  | 1.333471  | H      | -2.592065 | -2.408437 | 0.156676  | O      | -4.046946 | 1.054340  | -0.487555 |
| H      | 2.791923  | 2.507289  | 0.838014  | H      | -2.877377 | -1.150622 | 1.354266  | H      | -4.568193 | -3.338780 | -0.432414 |
| H      | 3.483793  | 2.027078  | 2.415298  | C      | -2.938819 | -0.480284 | -0.636697 | H      | -3.051896 | -3.618701 | 0.156431  |
| H      | 4.560012  | 2.333616  | 1.011517  | O      | -4.097927 | -0.487636 | -0.971950 | C      | -3.905469 | 2.478608  | -0.502465 |
| N      | 0.687894  | -0.441792 | 0.232114  | O      | -1.174322 | 0.396423  | 2.347459  | H      | -2.877172 | 2.759097  | -0.264267 |
| H      | 1.215665  | 0.109014  | 0.897167  | O      | -2.027060 | 0.351622  | -1.188375 | H      | -4.152089 | 2.787391  | -1.518027 |
| C      | -0.534569 | 0.130345  | -0.282709 | H      | 0.574671  | -2.344054 | 1.618195  | H      | -4.586865 | 2.936651  | 0.217345  |
| H      | -0.593825 | -0.080358 | -1.356482 | H      | -0.815680 | -2.195818 | 2.453968  | N      | -1.256889 | -0.422293 | -0.521810 |
| C      | -1.771744 | -0.482661 | 0.403439  | C      | -2.555234 | 1.234283  | -2.176521 | H      | -1.773868 | 0.264069  | -1.055290 |
| C      | -0.444113 | 1.628090  | -0.072537 | H      | -3.346312 | 1.856934  | -1.752314 | C      | 0.090499  | -0.085837 | -0.134397 |
| H      | -1.631696 | -1.567145 | 0.335345  | H      | -1.718725 | 1.850938  | -2.506141 | H      | 0.262862  | -0.443382 | 0.885465  |
| H      | -1.746101 | -0.222151 | 1.469685  | H      | -2.968638 | 0.670449  | -3.016339 | C      | 1.126201  | -0.759220 | -1.070950 |
| C      | -3.116910 | -0.109924 | -0.208992 | N      | 0.464199  | 0.853744  | 0.866692  | C      | 0.207311  | 1.423048  | -0.167749 |
| O      | 0.270848  | 2.155903  | 0.752594  | C      | 0.739252  | 2.150874  | 1.475307  | H      | 0.821869  | -1.809746 | -1.123114 |
| H      | -3.282658 | 0.971797  | -0.138786 | C      | 1.230327  | 0.638917  | -0.345316 | H      | 1.012114  | -0.336829 | -2.075677 |
| H      | -3.100868 | -0.344576 | -1.282109 | H      | 1.486707  | 2.052186  | 2.274199  | C      | 2.551956  | -0.658593 | -0.605035 |
| C      | -4.273587 | -0.850021 | 0.454233  | H      | -0.178112 | 2.538761  | 1.921450  | O      | -0.502556 | 2.139810  | -0.843190 |
| H      | -4.133756 | -1.934370 | 0.369509  | C      | 1.275937  | 2.964400  | 0.304970  | C      | 3.472412  | 0.177077  | -1.235072 |
| H      | -4.281251 | -0.624043 | 1.531011  | C      | 2.072890  | 1.928571  | -0.484567 | C      | 2.991514  | -1.412532 | 0.489478  |
| C      | -5.628901 | -0.492420 | -0.139164 | H      | 0.569792  | 0.518853  | -1.212872 | H      | 3.161474  | 0.767237  | -2.094308 |
| H      | -5.764267 | 0.604448  | -0.088193 | C      | 2.138034  | -0.577256 | -0.271800 | C      | 4.789315  | 0.265925  | -0.793507 |
| H      | -5.629075 | -0.751448 | -1.205657 | H      | 1.884214  | 3.816240  | 0.619478  | C      | 4.298477  | -1.332730 | 0.944931  |
| N      | -6.687361 | -1.256589 | 0.505993  | H      | 0.442476  | 3.343483  | -0.296891 | H      | 2.293235  | -2.081282 | 0.988260  |
| H      | -6.777019 | -0.965145 | 1.474774  | H      | 3.053164  | 1.781486  | -0.017036 | H      | 5.493391  | 0.919511  | -1.305182 |
| H      | -7.579745 | -1.057124 | 0.066553  | H      | 2.240299  | 2.188447  | -1.531495 | C      | 5.206441  | -0.488867 | 0.301891  |
| O      | -1.257805 | 2.300912  | -0.886383 | O      | 2.354895  | -1.247411 | 0.710060  | H      | 4.639099  | -1.920919 | 1.790790  |
| C      | -1.247639 | 3.720689  | -0.718631 | O      | 2.696768  | -0.800251 | -1.467449 | O      | 6.475657  | -0.450074 | 0.783098  |
| H      | -1.967377 | 4.107185  | -1.438769 | C      | 3.596533  | -1.909446 | -1.519383 | H      | 6.996339  | 0.153063  | 0.243260  |
| H      | -1.537948 | 3.989739  | 0.299532  | H      | 3.077726  | -2.834789 | -1.258398 | O      | 1.194744  | 1.862422  | 0.604289  |
| H      | -0.251082 | 4.120044  | -0.920107 | H      | 3.957746  | -1.949677 | -2.546193 | C      | 1.413339  | 3.273765  | 0.576883  |
| 14     |           |           |           | H      | 4.427226  | -1.763239 | -0.825092 | H      | 1.637343  | 3.607980  | -0.438761 |
| AspMet |           |           |           | 16     |           |           |           | H      | 0.528682  | 3.803421  | 0.938026  |
| N      | 2.784570  | -3.368791 | 0.133653  | AspSer |           |           |           | H      | 2.262234  | 3.451538  | 1.235189  |

|        |           |           |           |        |           |           |           |        |           |           |           |
|--------|-----------|-----------|-----------|--------|-----------|-----------|-----------|--------|-----------|-----------|-----------|
| 18     |           |           |           | H      | 6.349933  | -0.276402 | 0.864587  | O      | -1.148342 | -1.768454 | -1.795340 |
| AspThr |           |           |           | H      | 5.676031  | -2.325230 | 2.088478  | O      | -4.965135 | 0.728103  | -0.220251 |
| N      | 2.947349  | -2.571503 | -0.819908 | O      | 0.724121  | 2.404384  | 0.575343  | O      | -2.854240 | -1.833936 | -0.331608 |
| C      | 2.156740  | -1.561514 | -0.141528 | C      | 0.631651  | 3.806650  | 0.829180  | C      | -3.274973 | -3.071031 | -0.914000 |
| H      | 2.197655  | -1.731425 | 0.939979  | H      | 0.563117  | 4.364055  | -0.108021 | H      | -4.169342 | -3.363540 | -0.366426 |
| C      | 2.761429  | -0.179424 | -0.416171 | H      | -0.249103 | 4.027491  | 1.436775  | H      | -3.500562 | -2.935505 | -1.973813 |
| C      | 0.692893  | -1.569716 | -0.607899 | H      | 1.541948  | 4.068008  | 1.366729  | H      | -2.492483 | -3.825562 | -0.808000 |
| H      | 3.850222  | -0.269316 | -0.323160 |        |           |           |           | O      | -3.634579 | 0.495217  | 1.578910  |
| H      | 2.561007  | 0.146918  | -1.441888 | 20     |           |           |           | C      | -4.790436 | 0.160316  | 2.342399  |
| C      | 2.294883  | 0.885932  | 0.540273  | AspVal |           |           |           | H      | -5.250840 | -0.753403 | 1.957915  |
| O      | 1.737657  | 0.678087  | 1.600034  | N      | 3.177182  | -2.530163 | 0.175682  | H      | -4.439885 | 0.010947  | 3.363097  |
| O      | 0.386875  | -2.030931 | -1.700563 | C      | 2.413021  | -1.301281 | 0.276886  | H      | -5.526100 | 0.967136  | 2.303272  |
| O      | 2.601952  | 2.105940  | 0.101983  | H      | 2.385458  | -0.981458 | 1.324003  |        |           |           |           |
| H      | 2.688015  | -3.484029 | -0.456649 | C      | 3.126427  | -0.210970 | -0.537073 | 22     |           |           |           |
| H      | 2.633264  | -2.585464 | -1.789611 | C      | 0.979093  | -1.476578 | -0.247078 | GluGlu |           |           |           |
| C      | 2.128296  | 3.177205  | 0.918841  | H      | 4.177075  | -0.215257 | -0.224057 | N      | 1.729328  | -3.298676 | 0.884681  |
| H      | 2.529835  | 3.099695  | 1.931907  | H      | 3.105238  | -0.451001 | -1.603635 | C      | 1.791289  | -1.846148 | 0.862628  |
| H      | 2.476312  | 4.090458  | 0.437207  | C      | 2.606686  | 1.195977  | -0.381646 | H      | 1.805816  | -1.483294 | 1.899913  |
| H      | 1.037018  | 3.154619  | 0.959545  | O      | 2.547150  | 2.015516  | -1.264858 | C      | 3.093004  | -1.421323 | 0.173248  |
| N      | -0.205760 | -1.023712 | 0.251219  | O      | 0.707542  | -2.350523 | -1.062213 | C      | 0.594712  | -1.246982 | 0.116650  |
| H      | 0.157557  | -0.501785 | 1.043406  | O      | 2.256972  | 1.462073  | 0.895468  | H      | 3.908029  | -1.974906 | 0.646051  |
| C      | -1.528588 | -0.695080 | -0.197298 | H      | 2.841683  | -3.182750 | 0.878133  | H      | 3.043137  | -1.746392 | -0.873613 |
| H      | -1.747957 | -1.334721 | -1.059590 | H      | 2.926097  | -2.958829 | -0.714410 | C      | 3.369471  | 0.080262  | 0.238335  |
| C      | -2.573326 | -0.938580 | 0.894343  | C      | 1.821408  | 2.804410  | 1.135134  | H      | 2.579518  | 0.665018  | -0.238228 |
| C      | -1.571693 | 0.752561  | -0.683943 | H      | 0.864648  | 2.985382  | 0.641923  | H      | 3.427757  | 0.397592  | 1.288625  |
| H      | -3.550236 | -0.651364 | 0.478365  | H      | 1.707391  | 2.887158  | 2.215673  | C      | 4.662397  | 0.486528  | -0.424489 |
| C      | -2.613319 | -2.389619 | 1.340469  | H      | 2.564770  | 3.515346  | 0.768818  | O      | 4.782256  | 1.373380  | -1.235902 |
| O      | -2.210467 | -0.067505 | 1.952395  | N      | 0.062728  | -0.597123 | 0.219558  | O      | 0.179737  | -1.756557 | -0.918294 |
| O      | -0.629607 | 1.507094  | -0.711196 | H      | 0.344123  | 0.161684  | 0.827822  | O      | 5.694244  | -0.255923 | 0.014051  |
| H      | -1.635218 | -2.699003 | 1.717178  | C      | -1.279081 | -0.558031 | -0.314706 | H      | 0.936626  | -3.591848 | 1.448949  |
| H      | -3.354532 | -2.524154 | 2.136506  | H      | -1.233815 | -0.778365 | -1.387818 | H      | 1.506028  | -3.597140 | -0.063579 |
| H      | -2.893772 | -3.047888 | 0.512566  | C      | -2.191118 | -1.626510 | 0.346053  | C      | 6.956872  | 0.075020  | -0.559335 |
| H      | -2.786332 | -0.245628 | 2.702024  | H      | -1.789240 | 0.855884  | -0.123383 | H      | 7.673799  | -0.619098 | -0.121565 |
| O      | -2.798914 | 1.077137  | -1.111696 | H      | -1.592479 | -2.542655 | 0.273637  | H      | 6.928960  | -0.037099 | -1.645966 |
| C      | -2.933911 | 2.412237  | -1.596615 | C      | -2.448529 | -1.325076 | 1.818534  | H      | 7.229773  | 1.106690  | -0.322998 |
| H      | -3.971003 | 2.509453  | -1.916144 | C      | -3.486132 | -1.856127 | -0.425395 | N      | 0.038537  | -0.134066 | 0.651008  |
| H      | -2.707510 | 3.131516  | -0.805794 | O      | -1.295605 | 1.660648  | 0.637961  | H      | 0.412266  | 0.304195  | 1.481976  |
| H      | -2.255850 | 2.586030  | -2.435519 | H      | -3.080944 | -0.437951 | 1.943251  | C      | -1.029500 | 0.573354  | -0.014497 |
|        |           |           |           | H      | -2.963609 | -2.163885 | 2.296351  | H      | -0.834721 | 0.575960  | -1.093868 |
| 19     |           |           |           | H      | -1.514488 | -1.151729 | 2.361458  | C      | -2.388169 | -0.111342 | 0.233729  |
| AspTrp |           |           |           | H      | -3.287489 | -2.085259 | -1.477262 | C      | -0.993209 | 1.998382  | 0.505259  |
| N      | -3.106386 | -3.214755 | -1.266099 | H      | -4.030639 | -2.702932 | 0.003915  | H      | -2.232762 | -1.172382 | 0.024109  |
| C      | -3.120485 | -1.848405 | -0.797633 | H      | -4.141767 | -0.981468 | -0.390673 | H      | -2.642999 | -0.019578 | 1.296499  |
| H      | -3.547800 | -1.195298 | -1.568212 | O      | -2.859524 | 1.111872  | -0.876047 | C      | -3.525102 | 0.407803  | -0.642647 |
| C      | -3.924835 | -1.632001 | 0.507116  | C      | -3.409739 | 2.422654  | -0.724136 | O      | -0.416595 | 2.331562  | 1.517192  |
| C      | -1.668925 | -1.443675 | -0.540431 | H      | -4.267807 | 2.460814  | -1.393668 | H      | -3.721883 | 1.469054  | -0.485997 |
| H      | -4.946445 | -1.995932 | 0.337827  | H      | -3.719520 | 2.592042  | 0.309638  | H      | -3.252557 | 0.282202  | -1.699104 |
| H      | -3.486019 | -2.213676 | 1.321541  | H      | -2.672357 | 3.179319  | -1.001392 | C      | -4.833023 | -0.314024 | -0.429617 |
| C      | -4.026976 | -0.198604 | 0.968458  |        |           |           |           | O      | -5.912771 | 0.220748  | -0.342345 |
| O      | -3.827912 | 0.191834  | 2.092575  | 21     |           |           |           | O      | -1.682524 | 2.834461  | -0.270358 |
| O      | -0.845004 | -2.259594 | -0.141436 | GluAsp |           |           |           | C      | -1.720841 | 4.192209  | 0.181116  |
| O      | -4.395820 | 0.612752  | -0.044037 | N      | 2.134579  | 3.230545  | -0.967604 | H      | -2.317570 | 4.729167  | -0.554542 |
| H      | -4.007001 | -3.658006 | -1.127891 | C      | 1.875373  | 1.800629  | -0.930354 | H      | -2.180616 | 4.253884  | 1.169895  |
| H      | -2.406403 | -3.723369 | -0.732213 | H      | 1.882884  | 1.418659  | -1.960648 | H      | -0.710295 | 4.603048  | 0.232490  |
| C      | -4.535395 | 1.993542  | 0.305313  | C      | 3.001512  | 1.118504  | -0.144857 | O      | -4.662997 | -1.646071 | -0.371556 |
| H      | -3.557613 | 2.429056  | 0.521434  | C      | 0.526510  | 1.493901  | -0.271801 | C      | -5.863194 | -2.397797 | -0.205183 |
| H      | -4.974336 | 2.474380  | -0.568532 | H      | 3.947725  | 1.463706  | -0.568897 | H      | -5.557097 | -3.442964 | -0.170620 |
| H      | -5.186666 | 2.102736  | 1.174946  | H      | 2.958651  | 1.477471  | 0.891163  | H      | -6.370824 | -2.115411 | 0.720472  |
| N      | -1.383821 | -0.137549 | -0.725482 | C      | 2.941818  | -0.408860 | -0.167702 | H      | -6.544478 | -2.225958 | -1.042202 |
| H      | -2.097900 | 0.516235  | -1.019043 | H      | 2.022776  | -0.791360 | 0.281870  |        |           |           |           |
| C      | -0.094898 | 0.406234  | -0.374330 | H      | 2.975997  | -0.761935 | -1.207498 | 23     |           |           |           |
| H      | 0.262740  | -0.083777 | 0.536956  | C      | 4.084870  | -1.063755 | 0.567674  | GluAla |           |           |           |
| C      | 0.949445  | 0.164350  | -1.498816 | O      | 3.972656  | -1.903919 | 1.428213  | N      | 1.321135  | 3.325916  | -0.570266 |
| C      | -0.291675 | 1.881451  | -0.102730 | O      | 0.154385  | 2.112892  | 0.719094  | C      | 0.928877  | 1.927149  | -0.639180 |
| H      | 0.774571  | -0.864211 | -1.833393 | O      | 5.272589  | -0.605679 | 0.134218  | H      | 0.744278  | 1.669239  | -1.691324 |
| H      | 0.720349  | 0.820283  | -2.346459 | H      | 1.474546  | 3.675582  | -1.599170 | C      | 2.085610  | 1.067709  | -0.116524 |
| C      | 2.367889  | 0.314344  | -1.067567 | H      | 1.907364  | 3.594423  | -0.043506 | C      | -0.329238 | 1.657966  | 0.192945  |
| O      | -1.253152 | 2.517580  | -0.484943 | C      | 6.407903  | -1.182109 | 0.775644  | H      | 2.989460  | 1.380682  | -0.645189 |
| C      | 3.260872  | 1.283183  | -1.438095 | H      | 7.278076  | -0.704074 | 0.326561  | H      | 2.230359  | 1.304795  | 0.945041  |
| C      | 2.706810  | -1.721831 | 0.531187  | H      | 6.380407  | -0.994328 | 1.851823  | C      | 1.870241  | -0.436091 | -0.287429 |
| C      | 3.069412  | -0.558488 | -0.164673 | H      | 6.437107  | -2.262292 | 0.611534  | H      | 0.986251  | -0.788028 | 0.248979  |
| H      | 3.126906  | 2.120775  | -2.109305 | N      | -0.216970 | 0.512084  | -0.834647 | H      | 1.727198  | -0.667923 | -1.351755 |
| N      | 4.470015  | 1.070132  | -0.818338 | H      | 0.119755  | -0.026352 | -1.622103 | C      | 3.029406  | -1.267254 | 0.203249  |
| C      | 4.385742  | -0.053489 | -0.032797 | C      | -1.450484 | 0.056942  | -0.244369 | O      | 2.949699  | -2.189136 | 0.979790  |
| C      | 3.655009  | -2.337031 | 1.332325  | H      | -1.318762 | -0.085374 | 0.835039  | O      | -0.475203 | 2.176854  | 1.294335  |
| H      | 1.702704  | -2.129683 | 0.436952  | C      | -2.587282 | 1.078465  | -0.444138 | O      | 4.189182  | -0.865128 | -0.346687 |
| H      | 5.295902  | 1.626182  | -0.951803 | C      | -1.778447 | -1.279941 | -0.883834 | H      | 0.619639  | 3.893302  | -1.037997 |
| C      | 5.342451  | -0.672738 | 0.772888  | H      | -2.208626 | 2.026903  | -0.047920 | H      | 1.269660  | 3.595166  | 0.411153  |
| C      | 4.956659  | -1.817753 | 1.452310  | H      | -2.818771 | 1.201986  | -1.504114 | C      | 5.335346  | -1.606540 | 0.063883  |
| H      | 3.392070  | -3.238493 | 1.877842  | C      | -3.866672 | 0.742725  | 0.280285  | H      | 6.182891  | -1.153607 | -0.449924 |

|        |           |           |           |        |           |           |           |        |           |           |            |
|--------|-----------|-----------|-----------|--------|-----------|-----------|-----------|--------|-----------|-----------|------------|
| H      | 5.466881  | -1.546037 | 1.147065  | H      | 2.630642  | -0.896024 | -1.145894 | H      | -2.429640 | 0.745474  | 0.373455   |
| H      | 5.235611  | -2.658380 | -0.216105 | C      | 3.864159  | -1.019805 | 0.563292  | H      | -3.475842 | 0.869336  | -1.045175  |
| N      | -1.247949 | 0.822947  | -0.345826 | O      | 3.813770  | -1.818457 | 1.467850  | C      | -4.478379 | 0.858093  | 0.815743   |
| H      | -1.076537 | 0.338293  | -1.216835 | O      | -0.057378 | 2.136054  | 0.654681  | O      | -4.353092 | 1.606048  | 1.755943   |
| C      | -2.411597 | 0.398132  | 0.395430  | O      | 5.019564  | -0.559586 | 0.050567  | O      | -0.419675 | -2.045620 | 0.346994   |
| H      | -2.112387 | 0.172145  | 1.426993  | H      | 1.084283  | 3.486098  | -1.884983 | O      | -5.665044 | 0.364061  | 0.420021   |
| C      | -3.506423 | 1.467067  | 0.439168  | H      | 1.627598  | 3.553660  | -0.363822 | H      | -1.748751 | -3.376148 | -2.124578  |
| C      | -2.907440 | -0.881193 | -0.248852 | C      | 6.195986  | -1.080583 | 0.664250  | H      | -2.118156 | -3.532779 | -0.658068  |
| H      | -3.839453 | 1.719609  | -0.571818 | H      | 7.033377  | -0.604254 | 0.154912  | C      | -6.779667 | 0.783280  | 1.203674   |
| H      | -4.362614 | 1.115137  | 1.019062  | H      | 6.212059  | -0.844885 | 1.731190  | H      | -7.650569 | 0.293773  | 0.768523   |
| H      | -3.096432 | 2.360781  | 0.913078  | H      | 6.244301  | -2.166277 | 0.547413  | H      | -6.652918 | 0.483425  | 2.246863   |
| O      | -2.461601 | -1.345467 | -1.275226 | N      | -0.537386 | 0.428447  | -0.757922 | H      | -6.891974 | 1.869810  | 1.165256   |
| O      | -3.906600 | -1.424325 | 0.445806  | H      | -0.219002 | -0.182125 | -1.499522 | N      | -0.181539 | -0.270702 | -1.033607  |
| C      | -4.443334 | -2.629485 | -0.104114 | C      | -1.717033 | -0.025828 | -0.058432 | H      | -0.558485 | 0.326017  | -1.757705  |
| H      | -5.237004 | -2.935738 | 0.575862  | H      | -1.489725 | -0.247634 | 0.995156  | C      | 1.070798  | 0.142260  | -0.450486  |
| H      | -4.842169 | -2.449548 | -1.105065 | C      | -2.839614 | 1.016086  | -0.030386 | H      | 0.997803  | 0.074979  | 0.640638   |
| H      | -3.670434 | -3.399069 | -0.164171 | C      | -2.132498 | -1.324590 | -0.725892 | C      | 2.242871  | -0.764841 | -0.909499  |
| 24     |           |           |           | H      | -2.359657 | 1.980071  | 0.173675  | C      | 1.290764  | 1.586245  | -0.852820  |
| GluArg |           |           |           | H      | -3.352075 | 1.084043  | -0.996104 | H      | 1.839094  | -1.781746 | -0.897810  |
| N      | 2.758947  | -3.289643 | 0.854393  | C      | -3.810031 | 0.757921  | 1.111468  | H      | 2.500663  | -0.524400 | -1.947066  |
| C      | 2.598519  | -1.844060 | 0.833520  | O      | -1.470412 | -1.891713 | -1.568831 | C      | 3.454757  | -0.705383 | -0.200092  |
| H      | 2.600728  | -1.479156 | 1.870091  | O      | -3.481730 | 0.180416  | 2.132297  | O      | 0.680934  | 2.137058  | -1.744588  |
| C      | 3.791842  | -1.230255 | 0.092722  | N      | -5.061866 | 1.251921  | 0.921021  | C      | 4.641225  | -0.097394 | -0.431400  |
| C      | 1.294580  | -1.437781 | 0.138047  | H      | -5.699446 | 1.218742  | 1.699738  | C      | 3.400096  | -1.281464 | 1.253302   |
| H      | 4.700057  | -1.647882 | 0.534599  | H      | -5.298021 | 1.818045  | 0.125050  | H      | 4.697987  | 0.348615  | -0.1421746 |
| H      | 3.751825  | -1.567186 | -0.950823 | O      | -3.305444 | -1.762179 | -0.281100 | C      | 5.750992  | -0.062277 | 0.408709   |
| C      | 3.836533  | 0.297053  | 0.143068  | C      | -3.746423 | -3.002285 | -0.837285 | C      | 4.504955  | -1.243284 | 2.096422   |
| H      | 2.953318  | 0.748008  | -0.134620 | H      | -4.700848 | -3.214815 | -0.358194 | C      | 2.481657  | -1.769295 | 1.573871   |
| H      | 3.875362  | 0.628089  | 1.189822  | H      | -3.867342 | -2.915901 | -1.919709 | H      | 6.669345  | 0.410131  | 0.071279   |
| C      | 5.034813  | 0.883072  | -0.560767 | H      | -3.024504 | -3.793546 | -0.623494 | C      | 5.684788  | -0.633072 | 1.676036   |
| O      | 4.997138  | 1.733946  | -1.417462 | 26     |           |           |           | H      | 4.448000  | -1.697421 | 3.081638   |
| O      | 0.925198  | -2.010581 | -0.881978 | GluCys |           |           |           | O      | 6.549964  | -0.607368 | 2.332255   |
| O      | 6.181588  | 0.347352  | -0.104817 | N      | -1.644700 | 3.266250  | 0.830443  | O      | 2.248985  | 2.160892  | -0.133251  |
| H      | 2.048165  | -3.695715 | 1.456715  | C      | -1.370643 | 1.838565  | 0.819797  | C      | 2.556952  | 3.509940  | -0.490087  |
| H      | 2.533484  | -3.620373 | -0.082757 | C      | -1.280645 | 1.493961  | 1.859350  | H      | 3.380244  | 3.803496  | 0.159260   |
| C      | 7.364516  | 0.853867  | -0.717649 | H      | -2.553231 | 1.117730  | 0.162341  | H      | 2.852151  | 3.571639  | -1.540016  |
| H      | 8.192970  | 0.320475  | -0.252134 | C      | -0.082598 | 1.522498  | 0.053016  | H      | 1.689903  | 4.154502  | -0.328044  |
| H      | 7.349795  | 0.672655  | -1.795275 | H      | -3.462407 | 1.468908  | 0.656558  | 28     |           |           |            |
| H      | 7.457797  | 1.929517  | -0.547374 | H      | -2.606983 | 1.440367  | -0.885036 | GluGly |           |           |            |
| N      | 0.599136  | -0.422250 | 0.697321  | C      | -2.472473 | -0.406809 | 0.232063  | N      | 1.154839  | 3.266733  | -0.568432  |
| H      | 0.922733  | 0.050689  | 0.530299  | H      | -1.588618 | -0.796210 | -0.278204 | C      | 0.779363  | 1.861837  | -0.595755  |
| C      | -0.605326 | 0.104605  | 0.096645  | H      | -2.415740 | -0.724411 | 1.282426  | H      | 0.535723  | 1.587657  | -1.631809  |
| H      | -0.468267 | 0.153971  | -0.989715 | C      | -3.662483 | -1.101752 | -0.382500 | C      | 1.977954  | 1.025605  | -0.133852  |
| C      | -1.822302 | -0.792959 | 0.395677  | O      | -3.606866 | -1.991127 | -1.197839 | C      | -0.421496 | 1.588653  | 0.315445   |
| C      | -0.782227 | 1.506506  | 0.646237  | O      | 0.187132  | 2.105014  | -0.991396 | H      | 2.844165  | 1.345226  | -0.718477  |
| H      | -1.503379 | -1.807686 | 0.131219  | O      | -4.818940 | -0.619406 | 0.105508  | H      | 2.181756  | 1.277465  | 0.914508   |
| H      | -2.006927 | -0.781839 | 1.477667  | H      | -0.935373 | 3.741419  | 1.381431  | C      | 1.774233  | -0.482393 | -0.274926  |
| C      | -3.093089 | -0.439508 | -0.366436 | H      | -1.510819 | 3.598648  | -0.123201 | H      | 0.924816  | -0.838449 | 0.312379   |
| O      | -0.257817 | 1.900092  | 1.665768  | C      | -5.993646 | -1.233386 | -0.419837 | H      | 1.575462  | -0.728924 | -0.327130  |
| H      | -3.461337 | 0.550281  | -0.084223 | H      | -6.832503 | -0.730784 | 0.060897  | C      | 2.967027  | -1.297865 | 0.158488   |
| H      | -2.877442 | -0.413782 | -1.443745 | H      | -6.042615 | -1.108481 | -1.504357 | O      | 2.931752  | -2.237125 | 0.917362   |
| C      | -4.203608 | -1.451540 | -0.092585 | H      | -6.005730 | -2.302197 | -0.191757 | O      | -0.508327 | 2.113478  | 1.418953   |
| H      | -3.879826 | -2.460983 | -0.374284 | N      | 0.724587  | 0.572284  | 0.583327  | O      | 4.098720  | -0.862974 | -0.423590  |
| H      | -4.432415 | -1.461284 | 0.977039  | H      | 0.480068  | 0.075105  | 1.429910  | H      | 0.416995  | 3.819123  | -0.996457  |
| N      | -5.446113 | -1.176279 | -0.785074 | C      | 1.906934  | 0.106446  | -0.099262 | H      | 1.163516  | 3.547993  | 0.410919   |
| H      | -5.398269 | -1.244360 | -1.792065 | H      | 1.690172  | -0.047165 | -1.163087 | C      | 5.271855  | -1.591809 | -0.070349  |
| C      | -6.259224 | -0.154455 | -0.335620 | C      | 3.031591  | 1.150274  | 0.012250  | H      | 6.092090  | -1.113050 | -0.604636  |
| N      | -5.985425 | 0.479574  | 0.733993  | C      | 2.282059  | -1.220422 | 0.537401  | H      | 5.441487  | -1.551123 | 1.008430   |
| N      | -7.333267 | 0.068326  | -1.197879 | H      | 2.608773  | 2.081407  | -0.367896 | H      | 5.180210  | -2.639317 | -0.368698  |
| H      | -6.747081 | 1.105404  | 0.995787  | H      | 3.306054  | 1.280886  | 1.063180  | N      | -1.361975 | 0.736191  | -0.152808  |
| H      | -7.737266 | -0.776193 | -1.579613 | S      | 4.502326  | 0.728165  | -0.990961 | H      | -1.307689 | 0.320616  | -1.072618  |
| H      | -8.037540 | 0.685449  | -0.822765 | O      | 1.800628  | -1.631814 | 1.570204  | C      | -2.511179 | 0.387868  | 0.633032   |
| O      | -1.592547 | 2.244557  | -0.109705 | H      | 4.837959  | 2.001581  | -1.259291 | C      | -3.374961 | -0.557431 | -0.163291  |
| C      | -1.858856 | 3.558617  | 0.387373  | O      | 3.212161  | -1.855617 | -0.165883 | H      | -2.227031 | -0.088606 | 1.579594   |
| H      | -2.523890 | 4.018891  | -0.341790 | C      | 3.676969  | -3.086692 | 0.395214  | H      | -3.097418 | 1.274227  | 0.906633   |
| H      | -2.340423 | 3.505656  | 1.366258  | H      | 4.439303  | -3.450740 | -0.291251 | O      | -3.118513 | -0.932291 | -1.285461  |
| H      | -0.930622 | 4.127376  | 0.476575  | H      | 4.100583  | -2.917082 | 1.387417  | O      | -4.453084 | -0.923676 | 0.527850   |
| 25     |           |           |           | H      | 2.854310  | -3.800695 | 0.474247  | C      | -5.331455 | -1.825592 | -0.149312  |
| GluAsn |           |           |           | 27     |           |           |           | H      | -4.809483 | -2.751845 | -0.400043  |
| N      | 1.792430  | 3.104992  | -1.263683 | GluPhe |           |           |           | H      | -6.146046 | -2.021070 | 0.546495   |
| C      | 1.548530  | 1.683929  | -1.072777 | N      | -2.404112 | -3.061179 | -1.414664 | H      | -5.711035 | -1.372916 | -1.068206  |
| H      | 1.499917  | 1.204498  | -2.060533 | C      | -2.221550 | -1.635994 | -1.189342 | 29     |           |           |            |
| C      | 2.724305  | 1.086881  | -0.292032 | H      | -2.305492 | -1.117859 | -2.154745 | GluGln |           |           |            |
| C      | 0.243585  | 1.437586  | -0.307660 | H      | -3.337583 | -1.139796 | -0.263581 | N      | -1.748933 | -3.312384 | -0.836875  |
| H      | 3.641683  | 1.384705  | -0.805714 | C      | -0.858932 | -1.339897 | -0.556341 | C      | -1.684222 | -1.859816 | -0.826504  |
| H      | 2.741474  | 1.552502  | 0.701401  | H      | -4.286975 | -1.478072 | -0.686002 | H      | -1.666264 | -1.505619 | -1.866615  |
| C      | 2.670483  | -0.433502 | -0.149752 | H      | -3.217167 | -1.637054 | 0.707077  | C      | -2.944673 | -1.317553 | -0.142918  |
| H      | 1.787389  | -0.765554 | 0.401047  | C      | -3.356779 | 0.376017  | -0.070610 | C      | -0.440620 | -1.360905 | -0.083674  |

|        |           |           |           |        |           |           |           |        |           |           |           |
|--------|-----------|-----------|-----------|--------|-----------|-----------|-----------|--------|-----------|-----------|-----------|
| H      | -3.804665 | -1.797018 | -0.617246 | C      | -2.930674 | 3.586812  | 0.171718  | C      | 4.215309  | -0.460283 | 0.407085  |
| H      | -2.927501 | -1.641569 | 0.905336  | H      | -3.591226 | 4.068893  | -0.547525 | O      | 1.385281  | 1.832386  | -1.664238 |
| C      | -3.085565 | 0.203311  | -0.213178 | H      | -3.402588 | 3.537056  | 1.155671  | H      | 4.539962  | 0.524649  | 0.045796  |
| H      | -2.253350 | 0.715046  | 0.275113  | H      | -1.990072 | 4.135283  | 0.258037  | C      | 4.058464  | -0.377711 | 1.924170  |
| H      | -3.102468 | 0.521658  | -1.264353 |        |           |           |           | C      | 5.291485  | -1.477077 | 0.029664  |
| C      | -4.346994 | 0.715974  | 0.435494  | 31     |           |           |           | H      | 3.647155  | -1.310902 | 2.326517  |
| O      | -4.398055 | 1.567121  | 1.291308  | GluHis |           |           |           | H      | 5.027747  | -0.205571 | 2.403417  |
| O      | -0.072544 | -1.897448 | 0.956231  | N      | 2.198443  | -3.388640 | 0.525102  | H      | 3.397245  | 0.440713  | 2.222770  |
| O      | -5.437758 | 0.112136  | -0.069243 | C      | 1.987941  | -1.956383 | 0.658066  | H      | 5.430487  | -1.533658 | -1.055320 |
| H      | -0.989238 | -3.677186 | -1.404806 | H      | 1.955482  | -1.708726 | 1.728537  | H      | 6.254829  | -1.214065 | 0.478280  |
| H      | -1.544325 | -3.621404 | 0.112217  | C      | 3.175348  | -1.225799 | 0.020411  | H      | 5.022583  | -2.479088 | 0.384337  |
| C      | -6.675287 | 0.546913  | 0.488786  | C      | 0.686433  | -1.516073 | -0.020287 | O      | 2.645270  | 2.225638  | 0.154895  |
| H      | -7.448815 | -0.033392 | -0.013571 | H      | 4.086649  | -1.661635 | 0.437245  | C      | 2.893921  | 3.541662  | -0.346519 |
| H      | -6.698850 | 0.364748  | 1.566083  | H      | 3.171199  | -1.447229 | -1.054250 | H      | 3.533506  | 4.022126  | 0.392416  |
| H      | -6.823541 | 1.615525  | 0.313510  | C      | 3.167079  | 0.286133  | 0.238790  | H      | 3.393697  | 3.494457  | -1.316723 |
| N      | 0.209432  | -0.305284 | -0.624844 | H      | 2.280718  | 0.758861  | -0.190161 | H      | 1.955727  | 4.089700  | -0.457867 |
| H      | -0.124544 | 0.157617  | -1.459214 | H      | 3.166598  | 0.501880  | 1.316383  |        |           |           |           |
| C      | 1.338852  | 0.305906  | 0.035657  | C      | 4.360432  | 0.993682  | -0.354773 | 33     |           |           |           |
| H      | 1.135942  | 0.343304  | 1.113187  | O      | 4.311329  | 1.984743  | -1.043509 | GluLys |           |           |           |
| C      | 2.630311  | -0.502746 | -0.198191 | O      | 0.352341  | -1.980832 | -1.103416 | N      | 1.925033  | -3.364809 | 0.818227  |
| C      | 1.438639  | 1.720466  | -0.502271 | O      | 5.512558  | 0.396271  | -0.003211 | C      | 1.869737  | -1.911765 | 0.823148  |
| H      | 2.353262  | -1.552562 | -0.065255 | H      | 1.483048  | -3.884861 | 1.049052  | H      | 1.887609  | -1.566997 | 1.866601  |
| H      | 2.971578  | -0.386921 | -1.231667 | H      | 2.026088  | -3.623468 | -0.451169 | C      | 3.112240  | -1.371997 | 0.105110  |
| C      | 3.771350  | -0.165486 | 0.750639  | C      | 6.689867  | 1.017681  | -0.513890 | C      | 0.606319  | -1.397838 | 0.124375  |
| O      | 0.861341  | 2.109381  | -1.493175 | H      | 7.523781  | 0.413692  | -0.157284 | H      | 3.982528  | -1.865834 | 0.544554  |
| H      | 3.972337  | 0.912326  | 0.743636  | H      | 6.672015  | 1.039783  | -1.606258 | H      | 3.057825  | -1.682534 | -0.945950 |
| H      | 3.503283  | -0.426954 | 1.781601  | H      | 6.775285  | 2.043490  | -0.146433 | C      | 3.270799  | 0.145966  | 0.190163  |
| C      | 5.055078  | -0.861939 | 0.328061  | N      | -0.050660 | -0.581765 | 0.628621  | C      | 2.428607  | 0.673156  | -0.263303 |
| O      | 5.322925  | -1.091625 | -0.839132 | H      | 0.202474  | -0.251863 | 1.549600  | H      | 3.323749  | 0.450396  | 1.244511  |
| N      | 5.905858  | -1.169519 | 1.342640  | C      | -1.278873 | -0.053943 | 0.077030  | C      | 4.515726  | 0.660335  | -0.488734 |
| H      | 6.769406  | -1.632175 | 1.110400  | H      | -1.155521 | 0.069053  | -1.002244 | O      | 4.549826  | 1.550215  | -1.305063 |
| H      | 5.654959  | -1.058374 | 2.309000  | C      | -2.448418 | -1.018303 | 0.353666  | O      | 0.196043  | -1.930660 | -0.900887 |
| O      | 2.249980  | 2.484207  | 0.325227  | C      | -1.504342 | 1.292037  | 0.742203  | O      | 5.613297  | 0.012306  | -0.059201 |
| C      | 2.418448  | 3.822595  | -0.245367 | H      | -2.138016 | -1.985434 | -0.061451 | H      | 1.178282  | -3.729601 | 1.403127  |
| H      | 3.094676  | 4.303634  | 0.459855  | H      | -2.524157 | -1.140043 | 1.442092  | H      | 1.690121  | -3.662557 | -0.127565 |
| H      | 2.847448  | 3.818968  | -1.249783 | C      | -3.764421 | -0.597208 | -0.210805 | C      | 6.835544  | 0.449350  | -0.648317 |
| H      | 1.457150  | 4.340156  | -0.271200 | O      | -1.250834 | 1.496289  | 1.909921  | H      | 7.616123  | -0.172868 | -0.211272 |
|        |           |           |           | N      | -4.954215 | -1.057407 | 0.307390  | H      | 6.808157  | 0.323792  | -1.733546 |
| 30     |           |           |           | C      | -4.141252 | 0.192560  | -1.270081 | H      | 7.016409  | 1.503868  | -0.424790 |
| GluIle |           |           |           | H      | -5.054239 | -1.673541 | 1.097619  | N      | -0.008517 | -0.332094 | 0.687452  |
| N      | 1.577178  | -3.326940 | 0.683381  | C      | -5.962009 | -0.537777 | -0.443981 | H      | 0.356250  | 0.116221  | 1.516759  |
| C      | 1.411575  | -1.882514 | 0.722235  | N      | -5.505348 | 0.225763  | -1.404949 | C      | -1.152696 | 0.301303  | 0.072268  |
| H      | 1.329920  | -1.570581 | 1.772786  | H      | -3.499108 | 0.752706  | -1.934707 | H      | -1.011361 | 0.304844  | -1.014688 |
| C      | 2.656394  | -1.230988 | 0.109505  | H      | -7.003243 | -0.748000 | -0.239833 | C      | -2.454708 | -0.459522 | 0.392729  |
| C      | 0.164662  | -1.441976 | -0.052134 | O      | -2.003281 | 2.196547  | -0.091384 | C      | -1.177655 | 1.729089  | 0.581298  |
| H      | 3.528873  | -1.664227 | 0.604873  | C      | -2.303946 | 3.467768  | 0.491856  | H      | -2.239609 | -1.509248 | 0.165137  |
| H      | 2.704074  | -1.521395 | -0.947570 | H      | -2.709604 | 4.072712  | -0.317234 | H      | -2.641828 | -0.395772 | 1.472746  |
| C      | 2.685006  | 0.292443  | 0.230086  | H      | -3.038646 | 3.354031  | 1.291817  | C      | -3.683789 | -0.017856 | -0.393261 |
| H      | 1.840181  | 0.760775  | -0.279933 | H      | -1.398292 | 3.922541  | 0.899088  | O      | -0.616094 | 2.094107  | 1.591389  |
| H      | 2.632698  | 0.578580  | 1.289641  |        |           |           |           | H      | -3.918125 | 1.031495  | -0.178691 |
| C      | 3.932683  | 0.917637  | -0.342553 | 32     |           |           |           | H      | -3.458490 | -0.064887 | -1.467504 |
| O      | 3.957565  | 1.824624  | -1.140076 | GluLeu |           |           |           | C      | -4.899517 | -0.887907 | -0.092243 |
| O      | -0.120965 | -1.960446 | -1.125993 | N      | -1.680815 | -3.329526 | -0.765861 | H      | -4.684832 | -1.938957 | -0.319787 |
| O      | 5.042510  | 0.348200  | 0.160572  | C      | -1.508618 | -1.885919 | -0.806837 | H      | -5.120378 | -0.845195 | 0.984796  |
| H      | 0.821596  | -3.764343 | 1.203548  | H      | -1.470343 | -1.570696 | -1.858923 | C      | -6.138979 | -0.470811 | -0.871130 |
| H      | 1.433030  | -3.611223 | -0.284473 | C      | -2.722298 | -1.229548 | -0.139275 | H      | -6.341436 | 0.599218  | -0.676251 |
| C      | 6.267588  | 0.890918  | -0.325765 | C      | -0.227676 | -1.455631 | -0.083963 | H      | -5.927433 | -0.551492 | -1.944995 |
| H      | 7.059345  | 0.323532  | 0.162789  | H      | -3.617901 | -1.659204 | -0.594977 | N      | -7.254971 | -1.355916 | -0.568242 |
| H      | 6.333689  | 0.783908  | -1.411332 | H      | -2.732642 | -1.519901 | 0.918902  | H      | -7.538837 | -1.228875 | 0.398610  |
| H      | 6.346460  | 1.951938  | -0.075461 | C      | -2.749719 | 0.293984  | -0.258665 | H      | -8.059906 | -1.109379 | -1.134407 |
| N      | -0.581701 | -0.460535 | 0.506661  | H      | -1.877003 | 0.757456  | 0.206753  | O      | -1.900268 | 2.532529  | -0.199560 |
| H      | -0.288835 | 0.005844  | 1.354746  | H      | -2.750651 | 0.579361  | -1.319680 | C      | -1.990114 | 3.888969  | 0.244220  |
| C      | -1.710074 | 0.123897  | -0.181691 | C      | -3.963128 | 0.924950  | 0.377504  | H      | -2.605053 | 4.400036  | -0.495144 |
| H      | -1.463084 | 0.217013  | -1.246306 | O      | -3.942604 | 1.831296  | 1.175924  | H      | -2.452869 | 3.940110  | 1.232458  |
| C      | -2.977495 | -0.765333 | -0.067219 | O      | 0.098264  | -1.978232 | 0.976606  | H      | -0.996199 | 4.338930  | 0.295358  |
| C      | -1.896792 | 1.509565  | 0.405702  | O      | -5.100216 | 0.361533  | -0.068360 |        |           |           |           |
| H      | -2.608280 | -1.761715 | -0.343139 | H      | -0.950002 | -3.769522 | -1.318252 | 34     |           |           |           |
| C      | -3.497957 | -0.813120 | 1.366151  | H      | -1.498484 | -3.617950 | 0.194301  | GluMet |           |           |           |
| C      | -4.053875 | -0.381972 | -1.086955 | C      | -6.295921 | 0.909642  | 0.480970  | N      | 1.899057  | -3.336880 | 0.810656  |
| O      | -1.386030 | 1.878911  | 1.441139  | H      | -7.114563 | 0.346151  | 0.033987  | C      | 1.815142  | -1.885547 | 0.821826  |
| H      | -3.950248 | 0.141612  | 1.661028  | H      | -6.306224 | 0.802507  | 1.568482  | H      | 1.824190  | -1.545292 | 1.866778  |
| H      | -4.259492 | -1.588364 | 1.484194  | H      | -6.382773 | 1.971143  | 0.235326  | C      | 3.047344  | -1.317415 | 0.107963  |
| H      | -2.691563 | -1.034995 | 2.071832  | N      | 0.498967  | -0.475135 | -0.667335 | C      | 0.543487  | -1.393097 | 0.123611  |
| H      | -4.479816 | 0.594708  | -0.829579 | H      | 0.208367  | -0.039450 | -1.531882 | H      | 3.926945  | -1.794027 | 0.547869  |
| C      | -3.576648 | -0.256853 | -2.067459 | C      | 1.682604  | 0.073208  | -0.403301 | H      | 3.001568  | -1.625889 | -0.944107 |
| C      | -5.167220 | -1.416374 | -1.207206 | H      | 1.504604  | 0.144762  | 1.034408  | C      | 3.173437  | 0.203446  | 0.197769  |
| H      | -5.740716 | -1.512523 | -0.280015 | C      | 2.905377  | -0.833066 | -0.293652 | H      | 2.320025  | 0.713907  | -0.254007 |
| H      | -5.871383 | -1.139559 | -1.997568 | C      | 1.870196  | 1.462607  | -0.617108 | H      | 3.221356  | 0.505761  | 1.252880  |
| H      | -4.763577 | -2.404552 | -1.453947 | H      | 2.595643  | -1.831095 | 0.039471  | C      | 4.406488  | 0.744114  | -0.482491 |
| O      | -2.696031 | 2.272404  | -0.340192 | H      | 3.065030  | -0.891173 | -1.378220 | O      | 4.419498  | 1.626383  | -1.307609 |

|        |           |           |           |        |           |           |           |        |           |           |           |
|--------|-----------|-----------|-----------|--------|-----------|-----------|-----------|--------|-----------|-----------|-----------|
| O      | 0.146369  | -1.923273 | -0.907791 | H      | -3.183579 | 1.485620  | 0.593055  |        |           |           |           |
| O      | 5.518692  | 0.128211  | -0.044143 | H      | -2.391746 | 1.356395  | -0.977009 | 38     |           |           |           |
| H      | 1.159636  | -3.720133 | 1.392947  | C      | -2.142503 | -0.384702 | 0.281449  | GluThr |           |           |           |
| H      | 1.674527  | -3.637047 | -0.136744 | H      | -1.269177 | -0.785932 | 0.237551  | N      | -1.217264 | 2.985248  | -1.596747 |
| C      | 6.731371  | 0.589471  | -0.634904 | H      | -2.023579 | -0.610141 | 1.350364  | C      | -1.162583 | 2.142789  | -0.409872 |
| H      | 7.526262  | -0.006335 | -0.187046 | C      | -3.332256 | -1.171475 | -0.210439 | H      | -1.508000 | 2.662092  | 0.506330  |
| H      | 6.711291  | 0.448791  | -1.718437 | O      | -3.278892 | -2.139497 | -0.930961 | C      | -2.045623 | 0.910580  | -0.604924 |
| H      | 6.883604  | 1.651195  | -0.424735 | O      | 0.364267  | 2.097656  | -1.264254 | C      | 0.327895  | 1.903488  | -0.147021 |
| N      | -0.099640 | -0.347446 | 0.695304  | O      | -4.485158 | -0.674430 | 0.271782  | H      | -2.996619 | 1.248087  | -1.029208 |
| H      | 0.259875  | 0.114532  | 1.519547  | H      | -0.713714 | 3.893950  | 1.013353  | H      | -1.609125 | 0.254614  | -1.368721 |
| C      | -1.247663 | 0.265830  | 0.071105  | H      | -1.340561 | 3.603840  | -0.448264 | C      | -2.342386 | 0.150530  | 0.688751  |
| H      | -1.089766 | 0.287437  | -1.013923 | C      | -5.657290 | -1.373796 | -0.139753 | H      | -1.443483 | -0.247171 | 1.167036  |
| C      | -2.533105 | -0.537237 | 0.361646  | H      | -6.494302 | -0.847214 | 0.318038  | H      | -2.797555 | 0.841219  | 1.412795  |
| C      | -1.318286 | 1.687119  | 0.596728  | H      | -5.749165 | -1.366239 | -1.228648 | C      | -3.296789 | -1.009227 | 0.540403  |
| H      | -2.279837 | -1.582181 | 0.157742  | H      | -5.626560 | -2.412361 | 0.199459  | O      | -3.214876 | -2.053124 | 1.142318  |
| H      | -2.773477 | -0.457368 | 1.428510  | N      | 1.025646  | 0.725488  | 0.410920  | O      | 1.077946  | 2.865294  | -0.023442 |
| C      | -3.730695 | -0.139866 | -0.489670 | H      | 0.859382  | 0.339388  | 1.330370  | O      | -4.289023 | -0.735154 | -0.325580 |
| O      | -0.730717 | 2.070896  | 1.583910  | C      | 2.217331  | 0.265031  | -0.261156 | H      | -2.123538 | 3.437796  | -1.653805 |
| H      | -4.009610 | 0.904296  | -0.321774 | H      | 2.015167  | 0.130737  | -1.327245 | H      | -0.519367 | 3.716150  | -1.488437 |
| H      | -3.489041 | -0.259773 | -1.552447 | C      | 3.342454  | 1.295738  | -0.104125 | C      | -5.242688 | -1.781894 | -0.492239 |
| S      | -5.141476 | -1.208766 | -0.074246 | C      | 2.607118  | -1.055677 | 0.373841  | H      | -5.955374 | -1.420292 | -1.233082 |
| C      | -6.370528 | -0.526044 | -1.209608 | H      | 2.982319  | 2.224161  | -0.567352 | H      | -4.755468 | -2.695128 | -0.842262 |
| H      | -6.059628 | -0.644455 | -2.251325 | H      | 3.491493  | 1.476591  | 0.972562  | H      | -5.748393 | -1.997351 | 0.452465  |
| H      | -7.295697 | -1.085798 | -1.056607 | O      | 4.499285  | 0.793044  | -0.724739 | N      | 0.753956  | 0.624098  | -0.035894 |
| H      | -6.563244 | 0.530168  | -1.001214 | O      | 2.373035  | -1.321728 | 1.533958  | H      | 0.169524  | -0.831838 | -0.347324 |
| O      | -2.112344 | 2.460086  | -0.144945 | H      | 5.154091  | 1.496127  | -0.750338 | C      | 2.150151  | 0.309537  | 0.103194  |
| C      | -2.244335 | 3.809551  | 0.312580  | O      | 3.230487  | -1.862639 | -0.474371 | H      | 2.728612  | 1.197109  | -0.177295 |
| H      | -2.912449 | 4.296146  | -0.396473 | C      | 3.688191  | -3.094869 | 0.085595  | C      | 2.530500  | -0.086167 | 1.538134  |
| H      | -2.666600 | 3.833239  | 1.319647  | H      | 4.165894  | -3.630250 | -0.733496 | C      | 2.470570  | -0.831021 | -0.849174 |
| H      | -1.270145 | 4.302999  | 0.324415  | H      | 4.403238  | -2.905484 | 0.889444  | H      | 3.615748  | -0.272113 | 1.535830  |
|        |           |           |           | H      | 2.848948  | -3.669298 | 0.484507  | C      | 2.199177  | 0.998567  | 2.546613  |
| 35     |           |           |           | 37     |           |           |           | O      | 1.820884  | -1.284287 | 1.795266  |
| GluPro |           |           |           | GluTyr |           |           |           | O      | 1.648862  | -1.422302 | -1.508441 |
| N      | 0.742418  | -0.296078 | 2.529160  | N      | -2.798158 | -3.133604 | -1.224504 | H      | 1.119675  | 1.167721  | 2.575513  |
| C      | 0.308507  | -0.288541 | 1.142455  | C      | -2.603900 | -1.700621 | -1.068979 | H      | 2.528686  | 0.698710  | 3.547953  |
| H      | -0.074813 | 0.711892  | 0.918344  | H      | -2.709587 | -1.227228 | -2.055107 | H      | 2.689056  | 1.942377  | 2.293409  |
| C      | 1.497921  | -0.582919 | 0.217789  | C      | -3.695727 | -1.156894 | -0.141161 | H      | 1.973377  | -1.534711 | 2.711527  |
| C      | -0.758917 | -1.361039 | 0.891706  | C      | -1.224556 | -1.384630 | -0.482579 | O      | 3.778790  | -1.099610 | -0.859714 |
| H      | 1.879340  | -1.584653 | 0.444638  | H      | -4.656142 | -1.509701 | -0.525081 | C      | 4.161124  | -2.192193 | -1.696522 |
| H      | 1.167041  | -0.615811 | -0.827565 | H      | -3.554001 | -1.609570 | 0.848265  | H      | 5.242519  | -2.277426 | -1.596480 |
| C      | 2.610103  | 0.437068  | 0.388702  | C      | -3.704930 | 0.366255  | -0.017584 | H      | 3.670336  | -3.111995 | -1.370136 |
| H      | 2.294136  | 1.441107  | 0.079006  | H      | -2.766623 | 0.750713  | 0.388567  | H      | 3.885783  | -1.993739 | -2.734915 |
| H      | 2.861793  | 0.522896  | 1.452302  | H      | -3.844066 | 0.814913  | -1.010885 |        |           |           |           |
| C      | 3.853272  | 0.079352  | -0.378458 | C      | -4.805531 | 0.892835  | 0.869630  | 39     |           |           |           |
| O      | 4.034995  | -0.943173 | -0.997668 | O      | -4.657278 | 1.677251  | 1.776186  | GluTrp |           |           |           |
| O      | -0.706645 | -2.420311 | 1.505166  | O      | -0.764935 | -2.055715 | 0.436355  | N      | 2.742325  | -1.619429 | 2.935591  |
| O      | 4.773490  | 1.057650  | -0.287550 | O      | -6.003090 | 0.392442  | 0.516636  | C      | 2.645478  | -0.578028 | 1.924160  |
| H      | 0.003698  | 0.103361  | 3.101236  | H      | -2.160935 | -3.483823 | -1.934464 | H      | 2.870969  | 0.387156  | 2.398871  |
| H      | 0.795768  | -1.275889 | 2.806092  | H      | -2.492930 | -3.566871 | -0.354336 | C      | 3.690124  | -0.851401 | 0.838250  |
| C      | 5.997962  | 0.791145  | -0.965228 | C      | -7.099450 | 0.851370  | 1.303667  | C      | 1.248757  | -0.538299 | 1.297404  |
| H      | 6.632842  | 1.658839  | -0.786456 | H      | -7.982658 | 0.355335  | 0.901967  | H      | 4.651266  | -0.996536 | 1.337455  |
| H      | 6.469105  | -0.113978 | -0.573486 | H      | -6.957194 | 0.588182  | 2.354749  | H      | 3.429208  | -1.798791 | 0.350200  |
| H      | 5.827867  | 0.657196  | -2.036800 | H      | -7.201909 | 1.936893  | 1.227727  | C      | 3.800349  | 0.256725  | -0.207969 |
| N      | -1.696020 | -1.149302 | -0.071602 | H      | -0.558479 | -0.335771 | -1.017449 | H      | 2.862940  | 0.407017  | -0.748623 |
| C      | -2.616824 | -2.213272 | -0.452700 | N      | -0.940720 | 0.214221  | -1.774765 | H      | 4.050436  | 1.205964  | 0.286074  |
| C      | -1.952698 | 0.083480  | -0.787572 | H      | -0.940720 | 0.214221  | -1.774765 | C      | 4.860563  | 0.006417  | -1.251746 |
| H      | -3.486878 | -2.234383 | 0.217960  | C      | 0.722839  | 0.084680  | -0.504424 | O      | 4.706506  | 0.122366  | -2.444195 |
| H      | -2.109056 | -3.175781 | -0.371254 | H      | 0.701489  | 0.051296  | 0.589782  | O      | 0.685718  | -1.578340 | 0.966165  |
| C      | -3.007009 | -1.814706 | -1.869407 | C      | 1.859774  | -0.848619 | -0.997136 | O      | 6.031213  | -0.346460 | -0.691276 |
| C      | -3.078737 | -0.290809 | -1.784104 | C      | 0.935552  | 1.511124  | -0.966495 | H      | 2.135895  | -1.387258 | 3.717329  |
| H      | -1.063484 | 0.430281  | -1.330164 | H      | 1.479201  | -1.863599 | -0.845480 | H      | 2.343602  | -2.463701 | 2.528079  |
| C      | -2.410942 | 1.213794  | 0.123578  | H      | 1.989298  | -0.703076 | -2.075673 | C      | 7.089122  | -0.586863 | -1.615931 |
| H      | -3.949866 | -2.261780 | -2.194435 | C      | 3.164891  | -0.683988 | -0.269923 | H      | 7.950169  | -0.877218 | -1.014443 |
| H      | -2.223736 | -2.122908 | -2.570358 | O      | 0.355938  | 2.003842  | -1.911184 | H      | 6.820106  | -1.385805 | -2.311241 |
| H      | -4.048028 | 0.012406  | -1.373364 | C      | 4.263016  | -0.060466 | -0.859516 | H      | 7.311268  | 0.315134  | -2.191945 |
| H      | -2.954428 | 0.218676  | -2.741337 | C      | 3.304970  | -1.163489 | 1.037926  | N      | 0.689451  | 0.680516  | 1.132620  |
| O      | -2.636694 | 1.126207  | 1.305429  | H      | 4.185025  | 0.314255  | -1.877599 | H      | 1.171674  | 1.529217  | 1.396456  |
| O      | -2.545915 | 2.341894  | -0.587698 | C      | 5.465122  | 0.086452  | -0.174050 | C      | -0.600838 | 0.850127  | 0.508458  |
| C      | -3.002010 | 3.473841  | 0.154937  | C      | 4.493962  | -1.021109 | 1.736616  | H      | -0.672582 | 0.192861  | -0.364291 |
| H      | -2.302283 | 3.711644  | 0.959677  | H      | 2.463195  | -1.664591 | 1.511331  | C      | -1.756912 | 0.491821  | 1.482752  |
| H      | -3.056891 | 4.294654  | -0.559096 | H      | 6.312617  | 0.570555  | -0.655780 | C      | -0.682189 | 2.293839  | 0.061117  |
| H      | -3.984525 | 3.277388  | 0.590539  | C      | 5.583349  | -0.392343 | 1.130071  | H      | -1.426672 | -0.418034 | 1.995582  |
|        |           |           |           | H      | 4.603116  | -1.396404 | 2.748895  | H      | -1.842048 | 1.278803  | 2.240921  |
| 36     |           |           |           | O      | 6.726468  | -0.281831 | 1.854598  | C      | -3.065057 | 0.237099  | 0.816231  |
| GluSer |           |           |           | H      | 7.394643  | 0.158194  | 1.319607  | O      | 0.031660  | 3.173376  | 0.496135  |
| N      | -1.427318 | 3.351172  | 0.535003  | O      | 1.849140  | 2.141611  | -0.235457 | C      | -4.201743 | 0.997417  | 0.871469  |
| C      | -1.101745 | 1.937343  | 0.632303  | C      | 2.153371  | 3.473551  | -0.653148 | C      | -2.634292 | -2.003786 | -0.451533 |
| H      | -0.957758 | 1.685747  | 1.692451  | H      | 2.512595  | 3.479715  | -1.684812 | C      | -3.370695 | -0.887194 | -0.027280 |
| C      | -2.283074 | 1.124799  | 0.090011  | H      | 1.266300  | 4.107399  | -0.583824 | H      | -4.385211 | 1.921380  | 1.403050  |
| C      | 0.164630  | 1.600690  | -0.162138 | H      | 2.929297  | 3.823373  | 0.026026  | N      | -5.191748 | 0.418387  | 0.112539  |

|   |           |           |           |    |           |           |           |        |           |
|---|-----------|-----------|-----------|----|-----------|-----------|-----------|--------|-----------|
| C | -4.713866 | -0.739856 | -0.450520 | C  | -2.178960 | -1.116899 | 0.684473  |        |           |
| C | -3.250591 | -2.927065 | -1.280488 | O  | -0.145352 | 2.576438  | 0.098955  | 44     |           |
| H | -1.603742 | -2.138070 | -0.129793 | O  | -3.103435 | -1.027392 | 1.455788  | AlaArg |           |
| H | -6.127434 | 0.770372  | 0.013939  | O  | -2.022258 | 1.465185  | -0.445223 | N      | 5.191985  |
| C | -5.336513 | -1.669912 | -1.284427 | C  | -2.724273 | 2.710943  | -0.459840 | C      | -1.588313 |
| C | -4.585144 | -2.760977 | -1.692589 | H  | -3.757095 | 2.462945  | -0.699057 | H      | -0.606533 |
| H | -2.696250 | -3.797341 | -1.619142 | H  | -2.662005 | 3.194653  | 0.517236  | C      | 4.333232  |
| H | -6.368316 | -1.546770 | -1.601733 | H  | -2.301546 | 3.376694  | -1.215563 | C      | -1.007571 |
| H | -5.038159 | -3.503951 | -2.342606 | O  | -2.288641 | -1.620245 | -0.555402 | H      | 0.410413  |
| O | -1.642651 | 2.487116  | -0.837372 | C  | -3.606247 | -2.012421 | -0.929544 | H      | 4.170153  |
| C | -1.809763 | 3.838961  | -1.267487 | H  | -4.281561 | -1.153076 | -0.910904 | H      | -1.678492 |
| H | -2.052240 | 4.485386  | -0.420617 | H  | -3.522729 | -2.410270 | -1.940443 | C      | 1.277412  |
| H | -0.895541 | 4.205681  | -1.739880 | H  | -3.990830 | -2.774881 | -0.247905 | C      | 0.931496  |
| H | -2.629842 | 3.819589  | -1.983771 |    |           |           |           | C      | 2.940322  |
|   |           |           |           |    |           |           |           | H      | -0.872557 |
|   |           |           |           |    |           |           |           | H      | -0.212696 |
|   |           |           |           |    |           |           |           | H      | 4.997961  |
|   |           |           |           |    |           |           |           | H      | 1.036191  |
|   |           |           |           |    |           |           |           | H      | 0.132845  |
|   |           |           |           |    |           |           |           | H      | 4.376236  |
|   |           |           |           |    |           |           |           | H      | 0.704954  |
|   |           |           |           |    |           |           |           | O      | 1.777207  |
|   |           |           |           |    |           |           |           | O      | 5.954528  |
|   |           |           |           |    |           |           |           | H      | 0.105073  |
|   |           |           |           |    |           |           |           | H      | 1.287566  |
|   |           |           |           |    |           |           |           | H      | 2.535712  |
|   |           |           |           |    |           |           |           | H      | -1.700799 |
|   |           |           |           |    |           |           |           | H      | -1.022832 |
|   |           |           |           |    |           |           |           | H      | 5.950267  |
|   |           |           |           |    |           |           |           | H      | -2.101476 |
|   |           |           |           |    |           |           |           | H      | -0.172179 |
|   |           |           |           |    |           |           |           | H      | 4.631327  |
|   |           |           |           |    |           |           |           | N      | -2.246626 |
|   |           |           |           |    |           |           |           | N      | -1.141676 |
|   |           |           |           |    |           |           |           | H      | 2.171562  |
|   |           |           |           |    |           |           |           | H      | 0.152970  |
|   |           |           |           |    |           |           |           | C      | 0.212017  |
|   |           |           |           |    |           |           |           | C      | 2.529689  |
|   |           |           |           |    |           |           |           | C      | 0.879504  |
|   |           |           |           |    |           |           |           | H      | 0.814993  |
|   |           |           |           |    |           |           |           | C      | 0.835290  |
|   |           |           |           |    |           |           |           | H      | 0.350988  |
|   |           |           |           |    |           |           |           | C      | -0.298411 |
|   |           |           |           |    |           |           |           | C      | 0.827656  |
|   |           |           |           |    |           |           |           | C      | 0.127949  |
|   |           |           |           |    |           |           |           | C      | -1.371666 |
|   |           |           |           |    |           |           |           | C      | -0.176327 |
|   |           |           |           |    |           |           |           | C      | -0.578732 |
|   |           |           |           |    |           |           |           | C      | 0.400648  |
|   |           |           |           |    |           |           |           | C      | 0.503703  |
|   |           |           |           |    |           |           |           | H      | 1.814700  |
|   |           |           |           |    |           |           |           | H      | -0.086808 |
|   |           |           |           |    |           |           |           | H      | 0.269485  |
|   |           |           |           |    |           |           |           | H      | -1.578889 |
|   |           |           |           |    |           |           |           | H      | 0.350030  |
|   |           |           |           |    |           |           |           | H      | -0.230808 |
|   |           |           |           |    |           |           |           | C      | -0.301659 |
|   |           |           |           |    |           |           |           | O      | 1.461358  |
|   |           |           |           |    |           |           |           | C      | -1.568972 |
|   |           |           |           |    |           |           |           | O      | -0.607685 |
|   |           |           |           |    |           |           |           | H      | -0.215893 |
|   |           |           |           |    |           |           |           | O      | 1.079922  |
|   |           |           |           |    |           |           |           | H      | 2.530073  |
|   |           |           |           |    |           |           |           | H      | 0.703865  |
|   |           |           |           |    |           |           |           | H      | -2.055133 |
|   |           |           |           |    |           |           |           | H      | 0.368687  |
|   |           |           |           |    |           |           |           | H      | -0.141965 |
|   |           |           |           |    |           |           |           | H      | -1.489942 |
|   |           |           |           |    |           |           |           | C      | -0.853965 |
|   |           |           |           |    |           |           |           | C      | -1.284083 |
|   |           |           |           |    |           |           |           | H      | -2.461925 |
|   |           |           |           |    |           |           |           | H      | -1.633243 |
|   |           |           |           |    |           |           |           | H      | 0.478981  |
|   |           |           |           |    |           |           |           | H      | -2.013828 |
|   |           |           |           |    |           |           |           | H      | -2.632756 |
|   |           |           |           |    |           |           |           | H      | 0.421069  |
|   |           |           |           |    |           |           |           | N      | -2.561416 |
|   |           |           |           |    |           |           |           | N      | -1.373153 |
|   |           |           |           |    |           |           |           | N      | 1.536723  |
|   |           |           |           |    |           |           |           | N      | -3.804415 |
|   |           |           |           |    |           |           |           | H      | -1.718329 |
|   |           |           |           |    |           |           |           | H      | -0.059836 |
|   |           |           |           |    |           |           |           | C      | -3.862109 |
|   |           |           |           |    |           |           |           | C      | -2.053200 |
|   |           |           |           |    |           |           |           | C      | -1.011423 |
|   |           |           |           |    |           |           |           | N      | -4.715947 |
|   |           |           |           |    |           |           |           | N      | -0.723540 |
|   |           |           |           |    |           |           |           | N      | 0.234178  |
|   |           |           |           |    |           |           |           | N      | -4.428386 |
|   |           |           |           |    |           |           |           | N      | 0.210949  |
|   |           |           |           |    |           |           |           | H      | 1.062741  |
|   |           |           |           |    |           |           |           | H      | -5.903206 |
|   |           |           |           |    |           |           |           | H      | -0.882222 |
|   |           |           |           |    |           |           |           | H      | -0.482054 |
|   |           |           |           |    |           |           |           | H      | -5.248020 |
|   |           |           |           |    |           |           |           | H      | 0.780404  |
|   |           |           |           |    |           |           |           | H      | 1.260518  |
|   |           |           |           |    |           |           |           | H      | -6.205942 |
|   |           |           |           |    |           |           |           | H      | -1.842942 |
|   |           |           |           |    |           |           |           | H      | -0.569130 |
|   |           |           |           |    |           |           |           | O      | -6.650523 |
|   |           |           |           |    |           |           |           | O      | -2.280019 |
|   |           |           |           |    |           |           |           | C      | -0.171454 |
|   |           |           |           |    |           |           |           | C      | -0.506123 |
|   |           |           |           |    |           |           |           | H      | 2.217685  |
|   |           |           |           |    |           |           |           | C      | -0.857172 |
|   |           |           |           |    |           |           |           | H      | -0.920558 |
|   |           |           |           |    |           |           |           | H      | 3.570888  |
|   |           |           |           |    |           |           |           | H      | -0.656346 |
|   |           |           |           |    |           |           |           | H      | -1.742441 |
|   |           |           |           |    |           |           |           | H      | 3.732600  |
|   |           |           |           |    |           |           |           | H      | -1.352247 |
|   |           |           |           |    |           |           |           | H      | -1.254883 |
|   |           |           |           |    |           |           |           | H      | 3.719400  |
|   |           |           |           |    |           |           |           | H      | 0.372834  |
|   |           |           |           |    |           |           |           | H      | -0.096682 |
|   |           |           |           |    |           |           |           |        | 4.257052  |
|   |           |           |           |    |           |           |           |        | -0.865346 |
|   |           |           |           |    |           |           |           |        |           |
|   |           |           |           |    |           |           |           |        |           |
|   |           |           |           |    |           |           |           |        |           |
|   |           |           |           |    |           |           |           |        |           |
|   |           |           |           |    |           |           |           |        |           |
|   |           |           |           |    |           |           |           |        |           |
|   |           |           |           |    |           |           |           |        |           |
|   |           |           |           |    |           |           |           |        |           |
|   |           |           |           |    |           |           |           |        |           |
|   |           |           |           |    |           |           |           |        |           |
|   |           |           |           |    |           |           |           |        |           |
|   |           |           |           |    |           |           |           |        |           |
|   |           |           |           |    |           |           |           |        |           |
|   |           |           |           |    |           |           |           |        |           |
|   |           |           |           |    |           |           |           |        |           |
|   |           |           |           |    |           |           |           |        |           |
|   |           |           |           |    |           |           |           |        |           |
|   |           |           |           |    |           |           |           |        |           |
|   |           |           |           |    |           |           |           |        |           |
|   |           |           |           |    |           |           |           |        |           |
|   |           |           |           |    |           |           |           |        |           |
|   |           |           |           |    |           |           |           |        |           |
|   |           |           |           |    |           |           |           |        |           |
|   |           |           |           |    |           |           |           |        |           |
|   |           |           |           |    |           |           |           |        |           |
|   |           |           |           |    |           |           |           |        |           |
|   |           |           |           |    |           |           |           |        |           |
|   |           |           |           |    |           |           |           |        |           |
|   |           |           |           |    |           |           |           |        |           |
|   |           |           |           |    |           |           |           |        |           |
|   |           |           |           |    |           |           |           |        |           |
|   |           |           |           |    |           |           |           |        |           |
|   |           |           |           |    |           |           |           |        |           |
|   |           |           |           |    |           |           |           |        |           |
|   |           |           |           |    |           |           |           |        |           |
|   |           |           |           |    |           |           |           |        |           |
|   |           |           |           |    |           |           |           |        |           |
|   |           |           |           |    |           |           |           |        |           |
|   |           |           |           |    |           |           |           |        |           |
|   |           |           |           |    |           |           |           |        |           |
|   |           |           |           |    |           |           |           |        |           |
|   |           |           |           |    |           |           |           |        |           |
|   |           |           |           |    |           |           |           |        |           |
|   |           |           |           |    |           |           |           |        |           |
|   |           |           |           |    |           |           |           |        |           |
|   |           |           |           |    |           |           |           |        |           |
|   |           |           |           |    |           |           |           |        |           |
|   |           |           |           |    |           |           |           |        |           |
|   |           |           |           |    |           |           |           |        |           |
|   |           |           |           |    |           |           |           |        |           |
|   |           |           |           |    |           |           |           |        |           |
|   |           |           |           |    |           |           |           |        |           |
|   |           |           |           |    |           |           |           |        |           |
|   |           |           |           |    |           |           |           |        |           |
|   |           |           |           |    |           |           |           |        |           |
|   |           |           |           |    |           |           |           |        |           |
|   |           |           |           |    |           |           |           |        |           |
|   |           |           |           |    |           |           |           |        |           |
|   |           |           |           |    |           |           |           |        |           |
|   |           |           |           |    |           |           |           |        |           |
|   |           |           |           |    |           |           |           |        |           |
|   |           |           |           |    |           |           |           |        |           |
|   |           |           |           |    |           |           |           |        |           |
|   |           |           |           |    |           |           |           |        |           |
|   |           |           |           |    |           |           |           |        |           |
|   |           |           |           |    |           |           |           |        |           |
|   |           |           |           |    |           |           |           |        |           |
|   |           |           |           |    |           |           |           |        |           |
|   |           |           |           |    |           |           |           |        |           |
|   |           |           |           |    |           |           |           |        |           |
|   |           |           |           |    |           |           |           |        |           |
|   |           |           |           |    |           |           |           |        |           |
|   |           |           |           |    |           |           |           |        |           |
|   |           |           |           |    |           |           |           |        |           |
|   |           |           |           |    |           |           |           |        |           |
|   |           |           |           |    |           |           |           |        |           |
|   |           |           |           |    |           |           |           |        |           |
|   |           |           |           |    |           |           |           |        |           |
|   |           |           |           |    |           |           |           |        |           |
|   |           |           |           |    |           |           |           |        |           |
|   |           |           |           |    |           |           |           |        |           |
|   |           |           |           |    |           |           |           |        |           |
|   |           |           |           |    |           |           |           |        |           |
|   |           |           |           |    |           |           |           |        |           |
|   |           |           |           |    |           |           |           |        |           |
|   |           |           |           |    |           |           |           |        |           |
|   |           |           |           |    |           |           |           |        |           |
|   |           |           |           |    |           |           |           |        |           |
|   |           |           |           |    |           |           |           |        |           |
|   |           |           |           |    |           |           |           |        |           |
|   |           |           |           |    |           |           |           |        |           |
|   |           |           |           |    |           |           |           |        |           |
|   |           |           |           |    |           |           |           |        |           |
|   |           |           |           |    |           |           |           |        |           |
|   |           |           |           |    |           |           |           |        |           |
|   |           |           |           |    |           |           |           |        |           |
|   |           |           |           |    |           |           |           |        |           |
|   |           |           |           | </ |           |           |           |        |           |

|        |           |           |           |        |           |           |            |        |           |           |           |
|--------|-----------|-----------|-----------|--------|-----------|-----------|------------|--------|-----------|-----------|-----------|
| H      | -3.429733 | 0.388499  | 1.306944  | C      | -0.878055 | -0.817457 | 0.090286   | C      | 3.108933  | -2.579715 | -0.605061 |
| C      | -3.340908 | -1.589680 | 0.487863  | C      | -2.076357 | 0.094467  | 0.022257   | H      | 4.004378  | -2.444871 | -1.210184 |
| C      | -1.903586 | 0.460259  | -0.123323 | H      | -0.843851 | -1.447027 | -0.807796  | H      | 3.370630  | -2.704462 | 0.448207  |
| H      | -3.056223 | -2.098326 | -0.437272 | H      | -0.998391 | -1.507535 | 0.935167   | H      | 2.549937  | -3.458035 | -0.935714 |
| H      | -2.715179 | -1.947919 | 1.312862  | O      | -2.018195 | 1.302958  | 0.060105   |        |           |           |           |
| H      | -4.368872 | -1.881460 | 0.721780  | O      | -3.207574 | -0.602850 | -0.083429  | 51     |           |           |           |
| O      | -1.808143 | 1.535258  | -0.705380 | C      | -4.399087 | 0.182588  | -0.156916  | AlaHis |           |           |           |
| H      | -5.153187 | 0.427040  | -0.274820 | H      | -4.372094 | 0.838924  | -0.1029797 | N      | 4.348938  | -1.217052 | -0.959709 |
| H      | -3.952725 | 1.285504  | -0.998460 | H      | -5.217754 | -0.530908 | -0.239344  | C      | 3.443529  | -1.306340 | 0.170706  |
| N      | -0.815371 | -0.267963 | 0.218246  | H      | -4.511115 | 0.793865  | 0.741562   | H      | 3.324017  | -2.338260 | 0.556526  |
| H      | -0.892654 | -1.199790 | 0.601752  |        |           |           |            | C      | 3.949765  | -0.432755 | 1.314397  |
| C      | 0.510538  | 0.145286  | -0.167316 | 49     |           |           |            | C      | 2.048503  | -0.946447 | -0.347344 |
| H      | 0.507107  | 0.500219  | -1.205200 | AlaGln |           |           |            | H      | 3.937078  | 0.622757  | 1.027566  |
| C      | 0.989195  | 1.301395  | 0.727821  | N      | 4.414214  | -1.380820 | -0.671921  | H      | 3.376579  | -0.574923 | 2.238089  |
| C      | 1.399566  | -1.080569 | -0.057020 | C      | 3.538787  | -0.870834 | 0.368483   | H      | 4.985024  | -0.699064 | 1.545333  |
| H      | 0.216891  | 2.068522  | 0.656716  | H      | 3.396791  | -1.582006 | 1.206518   | O      | 1.712992  | -1.229738 | -1.487676 |
| H      | 1.061046  | 0.957151  | 1.763637  | C      | 4.101459  | 0.423912  | 0.943979   | H      | 5.143817  | -1.829823 | -0.819988 |
| S      | 2.575844  | 2.028599  | 0.178312  | C      | 2.142658  | -0.753530 | -0.248453  | H      | 3.848839  | -1.532880 | -1.786336 |
| O      | 1.057053  | -2.120298 | 0.461612  | H      | 4.141793  | 1.202150  | 0.176775   | N      | 1.192776  | -0.373977 | 0.544360  |
| H      | 2.280811  | 3.279448  | 0.571447  | H      | 3.526260  | 0.783832  | 1.804169   | H      | 1.569564  | -0.013547 | 1.405890  |
| O      | 2.600755  | -0.862552 | -0.581697 | H      | 5.123296  | 0.254035  | 1.295706   | C      | -0.129224 | 0.037855  | 1.445557  |
| C      | 3.531000  | -1.941964 | -0.462893 | O      | 1.758308  | -1.562508 | -1.087402  | H      | -0.256483 | -0.365414 | -0.869605 |
| H      | 4.451834  | -1.585714 | -0.921379 | H      | 5.195485  | -1.876509 | -0.258370  | C      | -1.223527 | -0.550533 | 1.063536  |
| H      | 3.694791  | -2.190270 | 0.588003  | H      | 3.878867  | -2.043754 | -1.226681  | C      | -0.243733 | 1.552786  | 0.018985  |
| H      | 3.155398  | -2.825169 | -0.984263 | N      | 1.342491  | 0.231913  | 0.214197   | H      | -0.863250 | -1.532695 | 1.381126  |
|        |           |           |           | H      | 1.686956  | 0.966230  | 0.815780   | H      | -1.304596 | 0.065124  | 1.970017  |
| 47     |           |           |           | C      | 0.009227  | 0.405876  | -0.308754  | C      | -2.562051 | -0.755137 | 0.440419  |
| AlaPhe |           |           |           | H      | 0.031249  | 0.231599  | -1.392046  | O      | -1.291950 | 2.166716  | 0.036037  |
| N      | 4.586510  | -1.634663 | -0.607223 | C      | -0.982299 | -0.587244 | 0.330659   | N      | -3.343965 | 0.266629  | -0.058622 |
| C      | 3.925492  | -0.746569 | 0.331963  | C      | -0.375883 | 1.848232  | -0.044994  | C      | -3.310410 | -1.893504 | 0.256208  |
| H      | 3.962719  | -1.111181 | 1.378126  | H      | -0.454989 | -1.543944 | 0.386713   | H      | -3.034251 | 1.219299  | -0.108439 |
| C      | 4.570167  | 0.634331  | 0.294869  | H      | -1.218173 | -0.288331 | 1.356756   | C      | -4.491041 | -0.304314 | -0.515842 |
| C      | 2.433598  | -0.773680 | -0.008994 | C      | -2.275139 | -0.777501 | -0.449366  | N      | -4.509668 | -1.605535 | -0.337474 |
| H      | 4.446213  | 1.091884  | -0.690585 | O      | 0.232113  | 2.589410  | 0.694616   | H      | -3.042012 | -2.906212 | 0.528222  |
| H      | 4.171207  | 1.304070  | 1.064766  | H      | -2.745116 | 0.191502  | -0.655302  | H      | -5.278716 | 0.280302  | -0.971929 |
| H      | 5.643834  | 0.541216  | 0.482607  | H      | -2.069429 | -1.240002 | -1.422432  | O      | 0.938110  | 2.146325  | -0.128917 |
| O      | 1.904742  | -1.801042 | -0.424748 | C      | -3.278348 | -1.598427 | 0.344551   | C      | 0.890579  | 3.562555  | -0.321944 |
| H      | 5.443109  | -1.995280 | -0.203287 | O      | -3.348462 | -1.551663 | 1.561049   | H      | 1.927239  | 3.878331  | -0.428532 |
| H      | 3.964373  | -2.419828 | -0.780522 | N      | -4.126751 | -2.353709 | -0.402772  | H      | 0.320445  | 3.804652  | -1.221474 |
| N      | 1.722456  | 0.350260  | 0.227205  | H      | -4.804528 | -2.919437 | 0.081271   | H      | 0.422591  | 4.050490  | 0.536032  |
| H      | 2.162500  | 1.228293  | 0.463256  | H      | -4.014291 | -2.467184 | -1.394557  |        |           |           |           |
| C      | 0.311397  | 0.397393  | -0.060569 | O      | -1.478156 | 2.205205  | -0.709588  | 52     |           |           |           |
| H      | 0.122252  | -0.095926 | -1.021206 | C      | -1.924592 | 3.542181  | -0.466023  | AlaLeu |           |           |           |
| C      | -0.520447 | -0.336468 | 1.024377  | H      | -2.818216 | 3.669621  | -1.075394  | N      | 4.333565  | -0.664487 | -0.741747 |
| C      | -0.070365 | 1.859016  | -0.169467 | H      | -2.156968 | 3.681433  | 0.592089   | C      | 3.428219  | -0.254413 | 0.316544  |
| H      | 0.066067  | -1.222892 | 1.284014  | H      | -1.154318 | 4.259547  | -0.757421  | H      | 3.502284  | -0.887591 | 1.223247  |
| H      | -0.582501 | 0.290408  | 1.920907  |        |           |           |            | C      | 3.715407  | 1.185932  | 0.726327  |
| C      | -1.887051 | -0.769592 | 0.568180  | 50     |           |           |            | C      | 2.006751  | -0.511707 | -0.193315 |
| O      | 0.645185  | 2.773780  | 0.178804  | AlaIle |           |           |            | C      | 3.521490  | 1.868921  | -0.105258 |
| C      | -3.049609 | -0.164759 | 1.046726  | N      | -4.304721 | 0.419258  | -0.759207  | H      | 3.134650  | 1.497979  | 1.601565  |
| C      | -2.002929 | -1.814081 | -0.354992 | C      | -3.335210 | 0.132558  | 0.282798   | H      | 4.770875  | 1.285355  | 0.996264  |
| H      | -2.972011 | 0.645925  | 1.767513  | H      | -3.414084 | 0.816051  | 1.151858   | O      | 1.771520  | -1.454188 | -0.942748 |
| C      | -4.302822 | -0.590217 | 0.614324  | C      | -3.514407 | -1.293082 | 0.792208   | H      | 5.225182  | -0.944625 | -0.350134 |
| C      | -3.252906 | -2.237420 | -0.792659 | C      | -1.953721 | 0.445408  | -0.300349  | H      | 3.922163  | -1.472619 | -1.201762 |
| H      | -1.099216 | -2.297423 | -0.720979 | H      | -3.316808 | -2.015330 | -0.004785  | N      | 1.031325  | 0.302665  | 0.265111  |
| H      | -5.198746 | -0.112146 | 1.000663  | H      | -2.875663 | -1.512582 | 1.654913   | H      | 1.233868  | 1.126541  | 0.812406  |
| C      | -4.407657 | -1.626278 | -0.308687 | H      | -4.548365 | -1.437326 | 1.119080   | C      | -0.344022 | 0.125763  | -0.140807 |
| H      | -3.326802 | -3.051790 | -1.507910 | O      | -1.807742 | 1.360288  | -1.104211  | H      | -0.360827 | -0.159070 | -1.197873 |
| H      | -5.384635 | -1.959959 | -0.646416 | H      | -5.198819 | 0.660651  | -0.347783  | C      | -1.022191 | -0.984118 | 0.688955  |
| O      | -1.293259 | 2.014046  | -0.668795 | H      | -3.968231 | 1.225885  | -1.278835  | C      | -1.023418 | 1.468490  | 0.029221  |
| C      | -1.749738 | 3.364520  | -0.760143 | N      | -0.910934 | -0.282157 | 0.159767   | H      | -0.366248 | -1.857378 | 0.587770  |
| H      | -2.763262 | 3.304905  | -1.153912 | H      | -1.049281 | -1.118558 | 0.708933   | H      | -0.994443 | -0.681538 | 1.743777  |
| H      | -1.745344 | 3.839403  | 0.223723  | C      | 0.427315  | -0.062640 | -0.336992  | C      | -2.447158 | -1.388837 | 0.299224  |
| H      | -1.108645 | 3.939700  | -1.432281 | H      | 0.375645  | 0.143279  | -1.413239  | O      | -0.601914 | 2.357911  | 0.735804  |
|        |           |           |           | C      | 1.098291  | 1.159861  | 0.345296   | H      | -3.110824 | -0.525966 | 0.443248  |
| 48     |           |           |           | C      | 1.183276  | -1.358314 | -0.117970  | C      | -2.547180 | -1.821540 | -1.162135 |
| AlaGly |           |           |           | H      | 0.333058  | 1.942517  | 0.260498   | C      | -2.921577 | -2.505532 | 1.227989  |
| N      | 3.816940  | -0.243813 | -0.477333 | C      | 1.367746  | 0.894954  | 1.823305   | H      | -1.829648 | -2.620257 | -1.383757 |
| C      | 2.741574  | 0.333523  | 0.308820  | C      | 2.334268  | 1.651022  | -0.414135  | H      | -3.549825 | -2.200823 | -1.385382 |
| H      | 2.940588  | 0.316539  | 1.398964  | O      | 0.796425  | -2.256908 | 0.597492   | H      | -2.352402 | -0.991152 | -1.846821 |
| C      | 2.507843  | 1.783439  | -0.101525 | H      | 2.185658  | 0.176921  | 1.959831   | H      | -2.869730 | -2.204218 | 2.279795  |
| C      | 1.529912  | -0.587680 | 0.144187  | H      | 1.646673  | 1.814383  | 2.344491   | H      | -3.957188 | -2.785266 | 1.009379  |
| H      | 2.179562  | 1.840902  | -1.142999 | H      | 0.479236  | 0.492442  | 2.319145   | H      | -2.302467 | -3.402347 | 1.107374  |
| H      | 1.780484  | 2.289627  | 0.542929  | H      | 3.141878  | 0.914941  | -0.326843  | O      | -2.152881 | 1.553999  | -0.677166 |
| H      | 3.445004  | 2.341666  | -0.019740 | H      | 2.087994  | 1.707204  | -1.482343  | C      | -2.868926 | 2.782287  | -0.529264 |
| O      | 1.670965  | -1.797357 | 0.008953  | C      | 2.826858  | 3.016501  | 0.051741   | H      | -3.756826 | 2.682404  | -1.151988 |
| H      | 4.714846  | 0.019864  | -0.088624 | H      | 3.177276  | 2.995300  | 1.088377   | H      | -3.146589 | 2.941799  | 0.515156  |
| H      | 3.732242  | -1.255400 | -0.418302 | H      | 3.661567  | 3.360712  | -0.566432  | H      | -2.256946 | 3.622874  | -0.864115 |
| N      | 0.306238  | -0.018719 | 0.216418  | H      | 2.032158  | 3.767547  | -0.016306  |        |           |           |           |
| H      | 0.171695  | 0.981919  | 0.226697  | O      | 2.333149  | -1.394092 | -0.793510  | 53     |           |           |           |

|              |           |           |           |           |           |           |           |           |           |           |           |           |
|--------------|-----------|-----------|-----------|-----------|-----------|-----------|-----------|-----------|-----------|-----------|-----------|-----------|
| AlaLys       |           |           |           | C         | 2.779138  | -1.293198 | 1.372322  | O         | 1.252009  | 2.790248  | 0.133276  |           |
|              | N         | 4.430595  | -1.864415 | -0.702687 | C         | 1.603749  | 0.236730  | -0.191727 | C         | -2.700420 | 0.246949  | 1.133661  |
|              | C         | 3.636729  | -1.264516 | 0.354816  | H         | 3.709978  | -1.013876 | 0.870717  | C         | -1.847407 | -1.542722 | -0.210868 |
|              | H         | 3.417043  | -1.964718 | 1.185460  | H         | 2.645239  | -0.627827 | 2.231293  | H         | -2.541865 | 1.076065  | 1.819100  |
|              | C         | 4.363597  | -0.058732 | 0.939270  | H         | 2.857863  | -2.323976 | 1.725680  | C         | -3.997819 | -0.071563 | 0.742831  |
|              | C         | 2.258630  | -0.965606 | -0.243511 | O         | 2.582745  | 0.654102  | -0.799837 | C         | -3.133104 | -1.869461 | -0.613852 |
|              | H         | 4.485552  | 0.721986  | 0.183340  | H         | 0.960491  | -2.115414 | -1.279668 | H         | -1.003782 | -2.125068 | -0.576056 |
|              | H         | 3.852895  | 0.354419  | 1.816213  | H         | 2.568687  | -1.887456 | -1.231041 | H         | -4.839381 | 0.504333  | 1.123549  |
|              | H         | 5.362914  | -0.358744 | 1.268054  | N         | 0.499989  | 1.019461  | -0.025647 | C         | -4.217954 | -1.131575 | -0.135519 |
|              | O         | 1.773996  | -1.703457 | -1.095260 | C         | 0.494950  | 2.387820  | -0.531070 | H         | -3.320063 | -2.696418 | -1.291173 |
|              | H         | 5.141659  | -2.467823 | -0.306157 | C         | -0.772247 | 0.636116  | 0.553520  | O         | -5.457778 | -1.494166 | -0.555889 |
|              | H         | 3.808179  | -2.438082 | -1.266153 | H         | 0.289003  | 2.402282  | -1.610019 | H         | -6.107848 | -0.915287 | -0.145342 |
|              | N         | 1.588406  | 0.099253  | 0.249100  | H         | 1.478368  | 2.835601  | -0.376003 | O         | -0.765236 | 2.211743  | -0.671489 |
|              | H         | 2.021044  | 0.761552  | 0.876511  | C         | -0.630363 | 3.032792  | 0.266429  | C         | -1.080740 | 3.599599  | -0.790633 |
|              | C         | 0.277363  | 0.447770  | -0.246224 | C         | -1.648319 | 1.900646  | 0.385964  | H         | -1.016133 | 4.094095  | 0.181498  |
|              | H         | 0.251259  | 0.276884  | -1.328999 | H         | -0.678622 | 0.379601  | 1.616456  | H         | -0.391568 | 4.090488  | -1.481802 |
|              | C         | -0.817804 | -0.418628 | 0.408135  | C         | -1.423324 | -0.538270 | -0.159247 | H         | -2.099364 | 3.636621  | -1.174033 |
|              | C         | 0.088564  | 1.925234  | 0.032112  | H         | -1.043025 | 3.920331  | -0.219812 |           |           |           |           |
|              | H         | -0.460754 | -1.450275 | 0.318902  | H         | -0.266751 | 3.325361  | 1.257595  | 58        |           |           |           |
|              | H         | -0.858885 | -0.183708 | 1.479808  | H         | -2.225604 | 1.825055  | -0.542560 | AlaThr    |           |           |           |
|              | C         | -2.202582 | -0.314418 | -0.220575 | H         | -2.355004 | 2.013253  | 1.210400  | N         | -4.174051 | 0.053909  | 0.018235  |
|              | O         | 0.740353  | 2.551206  | 0.839436  | O         | -1.110305 | -0.971713 | -1.242493 | C         | -2.903518 | -0.472831 | 0.478298  |
|              | H         | -2.584127 | 0.710081  | -0.138087 | O         | -2.434830 | -1.014027 | 0.576638  | H         | -2.788680 | -0.222309 | 1.541416  |
|              | H         | -2.123465 | -0.523600 | -1.296245 | C         | -3.156224 | -2.098017 | -0.012707 | C         | -2.888786 | -1.995172 | 0.328338  |
|              | C         | -3.193884 | -1.285255 | 0.412130  | H         | -2.492857 | -2.948522 | -0.186112 | C         | -1.714557 | 0.106004  | -0.297139 |
|              | H         | -2.834091 | -2.316829 | 0.317642  | H         | -3.934465 | -2.359460 | 0.703126  | H         | -2.997225 | -2.266838 | -0.727063 |
|              | H         | -3.265670 | -1.081943 | 1.491083  | H         | -3.596324 | -1.793790 | -0.965225 | H         | -1.954435 | -2.431152 | 0.694938  |
|              | C         | -4.583970 | -1.202932 | -0.202530 |           |           |           |           | H         | -3.728305 | -2.423728 | 0.880210  |
|              | H         | -4.941206 | -0.157632 | -0.141595 | 56        |           |           |           | O         | -1.839504 | 0.529497  | -1.439400 |
|              | H         | -4.514014 | -1.440538 | -1.271701 | AlaSer    |           |           |           | H         | -4.218464 | 1.045609  | 0.235903  |
|              | N         | -5.474672 | -2.176432 | 0.413839  | N         | -4.010664 | -0.062661 | -0.773505 | H         | -4.157158 | 0.016484  | -0.999664 |
|              | H         | -5.633994 | -1.925902 | 1.385145  | C         | -3.032492 | -0.237546 | 0.284610  | N         | -0.522629 | 0.091234  | 0.355990  |
|              | H         | -6.383153 | -2.152991 | -0.037162 | H         | -3.289774 | 0.312985  | 1.211738  | H         | -0.442074 | -0.401654 | 1.234088  |
| O            | -0.890281 | 2.457024  | -0.702631 | C         | -2.899614 | -1.714731 | 0.638735  | C         | 0.713303  | 0.332430  | -0.337558 |           |
| C            | -1.143673 | 3.842758  | -0.460706 | C         | -1.741042 | 0.434740  | -0.191621 | H         | 0.492831  | 0.333544  | -1.411544 |           |
| H            | -1.966107 | 4.111603  | -1.122191 | H         | -2.515027 | -2.282099 | -0.213097 | C         | 1.357432  | 1.679706  | 0.018313  |           |
| H            | -1.419033 | 4.007142  | 0.583602  | H         | -2.259163 | -1.882739 | 1.511835  | C         | 1.670901  | -0.805618 | -0.021045 |           |
| H            | -0.256697 | 4.438044  | -0.689100 | H         | -3.884815 | -2.119645 | 0.887898  | H         | 2.243720  | 1.785748  | -0.626055 |           |
|              |           |           |           | O         | -1.779282 | 1.433001  | -0.901696 | C         | 0.410912  | 2.843606  | -0.210582 |           |
| 54<br>AlaMet |           |           |           | H         | -4.947767 | -0.066494 | -0.388028 | O         | 1.743647  | 1.569782  | 1.377305  |           |
|              | N         | -4.458915 | -1.504183 | 0.748717  | H         | -3.846894 | 0.846084  | -1.199077 | O         | 1.439665  | -1.697389 | 0.760896  |
|              | C         | -3.629925 | -0.973411 | -0.318558 | N         | -0.575169 | -0.087366 | 0.254011  | H         | -0.458123 | 2.749427  | 0.445488  |
|              | H         | -3.490650 | -1.684013 | -1.157645 | H         | -0.540668 | -0.936660 | 0.798951  | H         | 0.912509  | 3.792883  | 0.008976  |
|              | C         | -4.247923 | 0.301090  | -0.882535 | C         | 0.697564  | 0.480638  | -0.117326 | H         | 0.060100  | 2.873729  | -1.245700 |
|              | C         | -2.220667 | -0.811052 | 0.257054  | H         | 0.657271  | 0.842986  | -1.148244 | H         | 2.112015  | 2.415004  | 1.651925  |
|              | H         | -4.287823 | 1.081993  | -0.118059 | C         | 1.032600  | 1.662645  | 0.801143  | O         | 2.803995  | -0.694517 | -0.720142 |
|              | H         | -3.710880 | 0.673161  | -1.762085 | C         | 1.736250  | -0.615419 | 0.016497  | C         | 3.777693  | -1.703852 | -0.451293 |
|              | H         | -3.710880 | 0.673161  | -1.762085 | H         | 0.227832  | 2.398136  | 0.667658  | H         | 4.627708  | -1.474017 | -1.092700 |
|              | H         | -5.274579 | 0.098955  | -1.201519 | H         | 1.008348  | 1.303489  | 1.842476  | H         | 4.071568  | -1.679634 | 0.600632  |
|              | O         | -1.789305 | -1.598993 | 1.091789  | O         | 2.294130  | 2.169149  | 0.441884  | H         | 3.378062  | -2.693723 | -0.683699 |
|              | H         | -5.235518 | -2.026852 | 0.360515  | O         | 1.637374  | -1.525690 | 0.811965  |           |           |           |           |
|              | H         | -3.888016 | -2.145828 | 1.292917  | H         | 2.431421  | 2.992420  | 0.918429  | 59        |           |           |           |
|              | N         | -1.461652 | 0.192556  | -0.238861 | O         | 2.754540  | -0.453898 | -0.819583 | AlaTrp    |           |           |           |
|              | H         | -1.844708 | 0.909803  | -0.837677 | C         | 3.805366  | -1.411918 | -0.686794 | N         | 4.488984  | -2.420632 | -0.393820 |
|              | C         | -0.120623 | 0.412960  | 0.244076  | H         | 4.548523  | -1.138831 | -1.434508 | C         | 4.126958  | -1.257841 | 0.396453  |
|              | H         | -0.096374 | 0.219700  | 1.323505  | H         | 4.236476  | -1.368794 | 0.316076  | H         | 4.174695  | -1.440541 | 1.488719  |
|              | C         | 0.879551  | -0.540660 | -0.443335 | H         | 3.429188  | -2.421598 | -0.867678 | C         | 5.057160  | -0.093300 | 0.075730  |
|              | C         | 0.199150  | 1.873272  | -0.010408 |           |           |           |           | C         | 2.641559  | -0.990846 | 0.137642  |
|              | H         | 0.422621  | -1.533718 | -0.389550 | 57        |           |           |           | H         | 4.948935  | 0.210113  | -0.969195 |
|              | H         | 0.962037  | -0.272533 | -1.503280 | AlaTyr    |           |           |           | H         | 4.889568  | 0.770231  | 0.729049  |
|              | C         | 2.254707  | -0.590029 | 0.207322  | N         | 4.716674  | -1.994472 | -0.654490 | H         | 6.095551  | -0.404184 | 0.223600  |
|              | O         | -0.433289 | 2.584582  | -0.759201 | C         | 4.168921  | -1.039105 | 0.291730  | O         | 1.866841  | -1.923913 | -0.057622 |
|              | H         | 2.744969  | 0.387200  | 0.176240  | H         | 4.193886  | -1.399554 | 1.339664  | H         | 5.273062  | -2.901383 | 0.031681  |
|              | H         | 2.159415  | -0.888763 | 1.258065  | C         | 4.946609  | 0.270313  | 0.228899  | H         | 3.693293  | -3.053521 | -0.394100 |
|              | S         | 3.288954  | -1.803428 | -0.666430 | C         | 2.674151  | -0.921030 | -0.015383 | N         | 2.224826  | 0.291334  | 0.195158  |
|              | C         | 4.805625  | -1.646224 | 0.303486  | H         | 4.843078  | 0.734208  | -0.755957 | H         | 2.871013  | 1.063434  | 0.274592  |
|              | H         | 4.639595  | -1.921334 | 1.348804  | H         | 4.636062  | 0.978888  | 1.004633  | C         | 0.839287  | 0.635922  | -0.008915 |
|              | H         | 5.535817  | -2.335315 | -0.126254 | H         | 6.010302  | 0.071787  | 0.389739  | H         | 0.431504  | 0.031889  | -0.826237 |
|              | H         | 5.210206  | -0.631462 | 0.250433  | O         | 2.036281  | -1.897497 | -0.399892 | C         | -0.006574 | 0.364373  | 1.265394  |
|              | O         | 1.268315  | 2.281981  | 0.675876  | H         | 5.542597  | -2.435515 | -0.266725 | C         | 0.802647  | 2.097819  | -0.397270 |
|              | C         | 1.643116  | 3.644835  | 0.456421  | H         | 4.016017  | -2.715490 | -0.805775 | H         | 0.341030  | -0.606054 | 1.636367  |
|              | H         | 2.522923  | 3.811514  | 1.076280  | N         | 2.084553  | 0.272568  | 0.213614  | H         | 0.246700  | 1.111126  | 0.206577  |
| H            | 1.875578  | 3.814131  | -0.597350 | H         | 2.614749  | 1.105847  | 0.425357  | C         | -1.477004 | 0.307823  | 1.030370  |           |
| H            | 0.832260  | 4.314358  | 0.751702  | C         | 0.678328  | 0.454972  | -0.042957 | O         | 1.715866  | 2.871635  | -0.199058 |           |
|              |           |           |           | H         | 0.416178  | -0.042777 | -0.983642 | C         | -2.431748 | 1.193781  | 1.450599  |           |
| 55<br>AlaPro |           |           |           | C         | -0.196694 | -0.161656 | 1.081495  | C         | -1.753486 | -1.887302 | -0.354661 |           |
|              | N         | 1.770747  | -2.172949 | -0.666675 | C         | 0.443503  | 1.944020  | -0.184066 | C         | -2.171155 | -0.718398 | 0.299807  |
|              | C         | 1.619029  | -1.180904 | 0.390388  | H         | 0.312066  | -1.088653 | 1.362689  | H         | -2.320838 | 2.098945  | 2.032302  |
|              | H         | 0.688660  | -1.405930 | 0.923735  | H         | -0.179706 | 0.497029  | 1.957138  | N         | -3.673576 | 0.785056  | 1.022792  |
|              |           |           |           | C         | -1.606708 | -0.478723 | 0.667202  | C         | -3.547574 | -0.386343 | 0.316560  |           |
|              |           |           |           |           |           |           |           |           |           |           |           |           |
|              |           |           |           |           |           |           |           |           |           |           |           |           |
|              |           |           |           |           |           |           |           |           |           |           |           |           |
|              |           |           |           |           |           |           |           |           |           |           |           |           |
|              |           |           |           |           |           |           |           |           |           |           |           |           |

|        |           |           |           |        |           |           |           |        |           |           |           |
|--------|-----------|-----------|-----------|--------|-----------|-----------|-----------|--------|-----------|-----------|-----------|
| C      | -2.709507 | -2.678895 | -0.970197 | C      | -1.656969 | -1.281450 | -0.887011 | C      | 2.760707  | 0.731267  | 0.232829  |
| H      | -0.700944 | -2.162060 | -0.371527 | H      | -3.008889 | 1.763933  | -0.030929 | H      | 3.475268  | 1.482022  | -0.116584 |
| H      | -4.539992 | 1.249093  | 1.230320  | H      | -3.351598 | 0.822160  | -1.501517 | H      | 2.742708  | 0.817813  | 1.330474  |
| C      | -4.511949 | -1.183563 | -0.301920 | C      | -4.255341 | 0.075747  | 0.264271  | N      | 3.248730  | -0.563554 | -0.194300 |
| C      | -4.071979 | -2.330290 | -0.944706 | O      | -0.845929 | -1.585916 | -1.733234 | H      | 2.570875  | -1.309276 | -0.123363 |
| H      | -2.404749 | -3.587269 | -1.481460 | O      | -5.316147 | -0.197685 | -0.242710 | C      | 4.551136  | -0.914851 | 0.095125  |
| H      | -5.565603 | -0.919078 | -0.281282 | O      | -2.601247 | -2.098707 | -0.425889 | N      | 5.340483  | -0.070896 | 0.649824  |
| H      | -4.795685 | -2.973552 | -1.036916 | C      | -2.643779 | -3.392659 | -1.032788 | N      | 4.895537  | -2.186319 | -0.354299 |
| O      | -0.356299 | 2.439038  | -0.954175 | H      | -3.482638 | -3.907672 | -0.567496 | H      | 6.291061  | -0.434562 | 0.664376  |
| C      | -0.480786 | 3.818953  | -1.299291 | H      | -2.797939 | -3.303248 | -2.110179 | H      | 4.148278  | -2.795201 | -0.649734 |
| H      | -0.371127 | 4.449270  | -0.413507 | H      | -1.710632 | -3.930067 | -0.849430 | H      | 5.605399  | -2.652086 | 0.187123  |
| H      | 0.282442  | 4.101648  | -2.028126 | O      | -3.966499 | -0.148736 | 1.556230  | O      | -2.179571 | 2.156899  | 1.188245  |
| H      | -1.476853 | 3.926156  | -1.726487 | C      | -5.003700 | -0.780363 | 2.301736  | H      | -1.700382 | 4.330212  | -0.810122 |
| 60     |           |           |           | H      | -5.230544 | -1.764786 | 1.884308  | H      | -1.059921 | 4.210977  | 0.663419  |
| AlaVal |           |           |           | H      | -4.624410 | -0.874688 | 3.318793  | N      | -1.903715 | 0.611266  | -0.439630 |
| N      | -4.144086 | -0.053109 | -0.767625 | H      | -5.913416 | -0.175411 | 2.286521  | H      | -1.324677 | 0.271367  | -1.195268 |
| C      | -3.144268 | -0.186272 | 0.276556  | 62     |           |           |           | C      | -2.743104 | -0.364160 | 0.212516  |
| H      | -3.345859 | 0.454988  | 1.157807  | ArgGlu |           |           |           | H      | -2.657264 | -0.208362 | 1.295796  |
| C      | -3.073888 | -1.631887 | 0.756288  | N      | 0.932442  | -3.939677 | 0.735237  | C      | -4.217284 | -0.224346 | -0.172437 |
| C      | -1.835450 | 0.372864  | -0.290050 | C      | 1.215516  | -2.513760 | 0.786106  | C      | -2.195832 | -1.740949 | -0.109228 |
| H      | -2.746957 | -2.291071 | -0.052701 | H      | 1.288771  | -2.213662 | 1.840452  | H      | -4.351905 | -0.355874 | -1.250121 |
| H      | -2.413076 | -1.755477 | 1.621497  | C      | 2.562013  | -2.248055 | 0.104268  | H      | -4.827206 | -0.961532 | 0.354335  |
| H      | -4.068970 | -1.961979 | 1.068651  | C      | 0.115308  | -1.705010 | 0.093044  | H      | -4.553874 | 0.777193  | 0.103342  |
| O      | -1.846648 | 1.305981  | -1.085957 | H      | 3.275805  | -2.961793 | 0.530104  | O      | -1.241582 | -1.952571 | -0.825890 |
| H      | -5.068071 | 0.025520  | -0.359100 | H      | 2.458480  | -2.499527 | -0.959739 | O      | -2.900920 | -2.700074 | 0.492962  |
| H      | -3.947959 | 0.806532  | -1.274044 | C      | 3.087030  | -0.825070 | 0.255916  | C      | -2.457460 | -4.033614 | 0.237578  |
| N      | -0.684075 | -0.163553 | 0.173985  | H      | 2.367837  | -0.112381 | -0.173730 | H      | -3.137886 | -4.681605 | 0.788305  |
| H      | -0.677692 | -1.013730 | 0.19203   | H      | 3.180893  | -0.567938 | 1.319409  | H      | -2.497930 | -4.253456 | -0.831728 |
| C      | 0.596920  | 0.284900  | -0.319254 | C      | 4.442498  | -0.644836 | -0.411767 | H      | -1.431517 | -4.169769 | 0.587722  |
| H      | 0.509058  | 0.493213  | -1.392527 | H      | 5.188358  | -1.310972 | 0.030131  | 64     |           |           |           |
| C      | 1.054246  | 1.593940  | 0.378830  | H      | 4.383991  | -0.919631 | -1.476654 | ArgArg |           |           |           |
| C      | 1.563087  | -0.864967 | -0.115025 | N      | 4.923737  | 0.709515  | -0.232886 | N      | -1.872191 | 4.081691  | 0.600804  |
| H      | 0.172841  | 2.241340  | 0.296212  | H      | 4.258700  | 1.425095  | -0.490064 | C      | -1.939406 | 2.631115  | 0.692362  |
| C      | 1.363124  | 1.373034  | 1.855795  | C      | 6.240056  | 0.998060  | -0.535469 | H      | -1.952624 | 2.352121  | 1.755081  |
| C      | 2.203491  | 2.281680  | -0.349806 | N      | 7.047125  | 0.063755  | -0.878805 | C      | -3.242339 | 2.151742  | 0.043050  |
| O      | 1.342648  | -1.816450 | 0.602651  | N      | 6.572452  | 2.334165  | -0.335623 | C      | -0.740574 | 1.975230  | -0.000232 |
| H      | 2.267576  | 0.767918  | 1.991696  | H      | 7.999590  | 0.419822  | -0.923730 | H      | -4.048256 | 2.757713  | 0.471666  |
| H      | 1.531121  | 2.329870  | 2.359272  | H      | 5.819778  | 2.987645  | -0.185879 | H      | -3.197274 | 2.395472  | -1.026914 |
| H      | 0.538203  | 0.865655  | 2.365092  | H      | 7.304809  | 2.687534  | -0.929343 | C      | -3.542860 | 0.669102  | 0.227985  |
| H      | 1.961931  | 2.449341  | -1.404300 | O      | -0.383929 | -2.088094 | -0.959763 | H      | -2.738192 | 0.066363  | -0.217328 |
| H      | 2.403565  | 3.256499  | 0.105986  | H      | 0.101951  | -4.137171 | 1.286801  | H      | -3.563638 | 0.417455  | 1.296765  |
| H      | 3.124158  | 1.693247  | -0.305445 | H      | 0.670785  | -4.153802 | -0.225746 | C      | -4.875589 | 0.276610  | -0.392679 |
| O      | 2.693517  | -0.705728 | -0.805906 | N      | -0.273886 | -0.556883 | 0.698341  | H      | -5.699727 | 0.827835  | 0.068178  |
| C      | 3.660031  | -1.744436 | -0.632644 | H      | 0.188319  | -0.209631 | 1.527355  | H      | -4.893504 | 0.542732  | -1.461286 |
| H      | 4.508462  | -1.463759 | -1.255242 | C      | -1.255804 | 0.310050  | 0.093329  | N      | -5.138694 | -1.132879 | -0.186904 |
| H      | 3.959575  | -1.820225 | 0.415219  | H      | -1.079402 | 0.337165  | -0.989730 | H      | -4.376235 | -1.741239 | -0.449629 |
| H      | 3.249329  | -2.704822 | -0.952248 | C      | -2.686514 | -0.208685 | 0.338992  | C      | -6.400259 | -1.624874 | -0.456950 |
| 61     |           |           |           | H      | -1.031891 | 1.696179  | 0.665445  | N      | -7.348353 | -0.831157 | -0.793948 |
| ArgAsp |           |           |           | C      | -2.653229 | -1.284604 | 0.148831  | N      | -6.519039 | -2.993231 | -0.233732 |
| N      | 0.916098  | 4.126416  | -0.632674 | H      | -2.952146 | -0.083560 | 1.394023  | H      | -8.235097 | -1.330512 | -0.813817 |
| C      | 1.012457  | 2.680856  | -0.750590 | C      | -3.745134 | 0.415530  | -0.555536 | H      | -5.671202 | -3.519972 | -0.093034 |
| H      | 1.089705  | 2.424649  | -1.816257 | O      | -0.329424 | 1.931704  | 1.623150  | H      | -7.197697 | -3.463835 | -0.809713 |
| C      | 2.285965  | 2.205126  | -0.039755 | H      | -3.803582 | 1.501786  | -0.429609 | O      | -0.314289 | 2.407362  | -1.066492 |
| C      | -0.211895 | 1.988517  | -0.143640 | H      | -3.511196 | 0.253640  | -1.614724 | H      | -1.072258 | 4.413391  | 1.132867  |
| H      | 3.097574  | 2.850668  | -0.392955 | C      | -5.112891 | -0.157483 | -0.286484 | H      | -1.654551 | 4.302869  | -0.369644 |
| H      | 2.170865  | 2.401940  | 1.034697  | O      | -5.386972 | -0.946093 | 0.587174  | N      | -0.190944 | 0.905160  | 0.620312  |
| C      | 2.643386  | 0.741208  | -0.269163 | O      | -1.713665 | 2.631758  | -0.001352 | H      | -0.568439 | 0.540571  | 1.484154  |
| H      | 1.830151  | 0.093660  | 0.089242  | C      | -1.578183 | 3.960511  | 0.510173  | C      | 0.908893  | 0.169760  | 0.400745  |
| H      | 2.748088  | 0.542364  | -1.344214 | H      | -2.191656 | 4.588242  | -0.134600 | H      | 0.761786  | 0.111708  | -1.043742 |
| C      | 3.941219  | 0.356480  | 0.426110  | H      | -1.927491 | 4.011463  | 1.543853  | C      | 2.255151  | 0.869420  | 0.314951  |
| H      | 4.775876  | 0.959387  | 0.058257  | O      | -0.533676 | 4.277960  | 0.474711  | C      | 0.862407  | -1.224451 | 0.633196  |
| H      | 3.872354  | 0.561892  | 1.505957  | H      | -6.016305 | 0.334207  | -1.151104 | H      | 2.105732  | 1.910575  | 0.006141  |
| N      | 4.268776  | -1.029481 | 0.162685  | C      | -7.345511 | -0.148860 | -0.967796 | H      | 2.429342  | 0.874772  | 1.398739  |
| H      | 3.511510  | -1.676322 | 0.332272  | H      | -7.947527 | 0.338723  | -1.734126 | C      | 3.458302  | 0.283774  | -0.412941 |
| C      | 5.523621  | -1.494810 | 0.504544  | H      | -7.381973 | -1.234623 | -1.086722 | O      | 0.294692  | -1.499768 | 1.667845  |
| N      | 6.410669  | -0.690770 | 0.961534  | H      | -7.715861 | 0.104802  | 0.028711  | H      | 3.650057  | -0.744023 | -0.094185 |
| N      | 5.711161  | -2.841912 | 0.213930  | 63     |           |           |           | H      | 3.258160  | 0.260176  | -1.493274 |
| H      | 7.312181  | -1.159131 | 1.024028  | ArgAla |           |           |           | C      | 4.720207  | 1.100986  | -0.143960 |
| H      | 4.899778  | -3.387807 | -0.030013 | N      | -0.840718 | 4.089737  | -0.324189 | H      | 4.583799  | 2.138139  | -0.473678 |
| H      | 6.362554  | -3.324467 | -0.810913 | C      | -0.565154 | 2.676733  | -0.520841 | H      | 4.920461  | 1.117159  | 0.931348  |
| O      | -0.748811 | 2.420989  | 0.870365  | H      | -0.557244 | 2.472192  | -1.600404 | N      | 5.913341  | 0.585971  | -0.784772 |
| H      | 0.144613  | 4.458819  | -1.204550 | C      | 0.825381  | 2.351471  | 0.045530  | H      | 5.908324  | 0.623498  | -1.794422 |
| H      | 0.639039  | 4.326490  | 0.326979  | C      | -1.624036 | 1.799256  | 0.156432  | C      | 6.522112  | -0.542732 | -0.272867 |
| N      | -0.667077 | 0.881546  | -0.781156 | H      | 1.495532  | 3.140445  | -0.313160 | N      | 6.108626  | -1.078579 | 0.815572  |
| H      | -0.164735 | 0.477504  | -1.560498 | H      | 0.783638  | 2.447421  | 1.139088  | N      | 7.567645  | -0.980616 | -1.086519 |
| C      | -1.733781 | 0.084640  | -0.230946 | H      | 1.375137  | 0.983700  | -0.342295 | H      | 6.742725  | -1.815252 | 1.116400  |
| H      | -1.588456 | -0.033168 | 0.850259  | C      | 0.695457  | 0.189778  | -0.002741 | H      | 8.125935  | -0.233764 | -1.477314 |
| C      | -3.106077 | 0.752234  | -0.439853 | H      | 1.429000  | 0.899598  | -1.436388 | H      | 8.140027  | -1.696594 | -0.665361 |
|        |           |           |           |        |           |           |           | O      | 1.534573  | -2.107644 | -0.105370 |

|        |           |           |           |        |           |           |           |        |           |           |           |
|--------|-----------|-----------|-----------|--------|-----------|-----------|-----------|--------|-----------|-----------|-----------|
| C      | 1.609660  | -3.425576 | 0.442641  | H      | 1.899482  | -0.225322 | -1.156571 | H      | -2.203404 | -1.122976 | 1.328648  |
| H      | 2.180217  | -4.010918 | -0.276934 | C      | 3.562948  | 0.624227  | -0.099882 | N      | -2.865965 | 0.149143  | -0.229062 |
| H      | 2.116712  | -3.408312 | 1.409924  | C      | 2.229799  | -1.424093 | 0.595531  | H      | -2.248434 | 0.948717  | -0.198914 |
| H      | 0.608652  | -3.842887 | 0.573660  | H      | 3.386129  | 1.614480  | -0.522062 | C      | -4.190748 | 0.396873  | 0.055817  |
| 65     |           |           |           | H      | 3.913786  | 0.728662  | 0.931014  | N      | -4.910628 | -0.499330 | 0.624118  |
| ArgAsn |           |           |           | S      | 4.817640  | -0.225644 | -1.125323 | N      | -4.639519 | 1.629509  | -0.414692 |
| N      | 0.519330  | 3.942061  | -0.972891 | O      | 1.679923  | -1.648257 | 1.651196  | H      | -5.886490 | -0.210137 | 0.637024  |
| C      | 0.679860  | 2.495962  | -0.951439 | H      | 5.451630  | 0.897962  | -1.501722 | H      | -3.937747 | 2.301136  | -0.686477 |
| H      | 0.687620  | 2.133933  | -1.988760 | O      | 2.953369  | -2.312491 | -0.078256 | H      | -5.388022 | 2.035434  | 0.123582  |
| C      | 2.022889  | 2.156041  | -0.298657 | C      | 3.109101  | -3.586540 | 0.552101  | O      | 2.729453  | -1.490427 | 1.164322  |
| C      | -0.452131 | 1.820249  | -0.171882 | H      | 3.739491  | -4.168808 | -0.117693 | H      | 2.745285  | -4.013513 | -0.496393 |
| H      | 2.787774  | 2.742048  | -0.820127 | H      | 3.585677  | -3.473154 | 1.528217  | H      | 2.064275  | -3.817235 | 0.953708  |
| H      | 1.993043  | 2.520860  | 0.736637  | H      | 2.136720  | -4.066407 | 0.683670  | N      | 2.277744  | -0.344669 | -0.741662 |
| C      | 2.386052  | 0.675954  | -0.314615 | 67     |           |           |           | H      | 1.669058  | -0.289611 | -1.543901 |
| H      | 1.630803  | 0.101585  | 0.241528  | ArgPhe |           |           |           | C      | 2.896404  | 0.863689  | -0.284220 |
| H      | 2.375679  | 0.290216  | -1.342679 | N      | 1.950495  | 4.459036  | -0.015714 | N      | 1.911569  | 2.004960  | -0.139362 |
| C      | 3.760186  | 0.423869  | 0.288789  | C      | 1.727081  | 3.076354  | -0.398178 | H      | 3.341687  | 0.646396  | 0.692799  |
| H      | 4.539879  | 0.929690  | -0.286867 | H      | 1.704622  | 3.019485  | -1.495428 | H      | 3.708635  | 1.191252  | -0.944736 |
| H      | 3.812790  | 0.843857  | 1.305638  | C      | 2.894074  | 2.214547  | 0.110016  | O      | 0.721625  | 1.940083  | -0.348374 |
| N      | 4.073737  | -0.989995 | 0.276144  | C      | 0.405493  | 2.540244  | 0.167403  | O      | 2.546068  | 3.117509  | 0.240237  |
| H      | 3.364195  | -1.576888 | 0.691670  | H      | 3.814346  | 2.732874  | -0.180516 | C      | 1.714910  | 4.265421  | 0.414682  |
| C      | 5.374645  | -1.390040 | 0.509374  | H      | 2.865719  | 2.213394  | 1.208124  | H      | 0.958521  | 4.078308  | 1.180530  |
| N      | 6.309954  | -0.522104 | 0.629707  | C      | 2.896345  | 0.784561  | -0.415208 | H      | 2.381437  | 5.068868  | 0.725307  |
| N      | 5.538267  | -2.772006 | 0.498034  | H      | 1.952410  | 0.288280  | -0.157320 | H      | 1.214779  | 4.523336  | -0.521981 |
| H      | 7.217083  | -0.983109 | 0.653128  | H      | 2.955200  | 0.787859  | -1.512658 | 69     |           |           |           |
| H      | 4.706796  | -3.341135 | 0.532361  | C      | 4.036447  | -0.060913 | 0.130970  | ArgGln |           |           |           |
| H      | 6.286223  | -3.117011 | 1.077315  | H      | 5.011004  | 0.321442  | -0.186195 | N      | -0.685796 | 4.239275  | 0.222705  |
| O      | -0.829861 | 2.272984  | 0.904244  | H      | 4.041541  | -0.033162 | 1.231867  | C      | -0.833498 | 2.813503  | 0.460021  |
| H      | -0.318440 | 4.181119  | -1.496129 | N      | 3.907027  | -1.414342 | -0.367772 | H      | -0.825268 | 2.641321  | 1.545144  |
| H      | 0.330728  | 4.231884  | -0.014701 | H      | 2.960519  | -1.769256 | -0.366552 | C      | -2.187645 | 2.345677  | -0.095275 |
| N      | -1.007110 | 0.724442  | -0.742539 | C      | 4.897058  | -2.331108 | -0.089104 | C      | 0.302833  | 2.016306  | -0.190610 |
| H      | -0.601054 | 0.317112  | -1.575061 | N      | 5.964557  | -1.965058 | 0.519779  | H      | -2.926223 | 3.084718  | 0.234038  |
| C      | -1.980564 | -0.103158 | -0.068450 | N      | 4.643038  | -3.598175 | -0.608361 | H      | -2.151716 | 2.403585  | -1.191637 |
| H      | -1.611295 | -0.423805 | 0.917912  | H      | 6.644145  | -2.722832 | 0.524816  | C      | -2.613127 | 0.950283  | 0.346102  |
| C      | -3.303275 | 0.618423  | 0.202715  | H      | 3.704845  | -3.788985 | -0.925250 | H      | -1.865065 | 0.207317  | 0.036848  |
| C      | -2.146275 | -1.348896 | -0.920010 | H      | 5.051472  | -4.357633 | -0.087998 | H      | -2.661075 | 0.905618  | 1.442783  |
| H      | -3.039478 | 1.627202  | 0.540282  | O      | -0.027263 | 2.930460  | 1.242023  | C      | -3.968768 | 0.550293  | -0.216521 |
| H      | -3.910379 | 0.705181  | -0.704726 | H      | 1.249608  | 5.045149  | -0.460621 | H      | -4.748918 | 1.248377  | 0.100783  |
| C      | -4.072151 | -0.038447 | 1.337853  | H      | 1.750707  | 4.525602  | 0.980957  | H      | -3.955656 | 0.589917  | -1.316828 |
| O      | -1.418985 | -1.634964 | -1.846874 | N      | -0.244475 | 1.613613  | -0.597006 | N      | -4.337521 | -0.764247 | 0.266827  |
| O      | -3.524892 | -0.685067 | 2.213697  | H      | 0.245364  | 1.215635  | -1.385747 | H      | -3.588012 | -1.441482 | 0.248508  |
| N      | -5.413516 | 0.179256  | 1.320868  | C      | -1.361038 | 0.855091  | -0.087423 | C      | -5.591966 | -1.256611 | -0.027859 |
| H      | -5.944841 | -0.123010 | 2.121053  | H      | -1.683647 | 1.341283  | 0.836320  | N      | -6.444506 | -0.525297 | -0.645562 |
| H      | -5.844512 | 0.802567  | 0.660789  | C      | -2.509771 | 0.829433  | -1.117570 | N      | -5.822881 | -2.528988 | 0.486115  |
| O      | -3.180771 | -2.087958 | -0.530922 | C      | -0.914636 | -0.566024 | 0.225141  | H      | -7.355127 | -0.979975 | -0.657733 |
| C      | -3.379318 | -3.296559 | -1.266064 | H      | -2.790989 | 1.871494  | -1.302523 | H      | -5.029483 | -3.042549 | 0.836796  |
| H      | -4.253967 | -3.769221 | -0.821874 | H      | -2.113030 | 0.430010  | -2.058678 | H      | -6.469952 | -3.092547 | -0.040687 |
| H      | -3.551338 | -3.079231 | -2.322835 | C      | -3.705456 | 0.022864  | -0.684839 | O      | 0.833252  | 2.397900  | -1.227240 |
| H      | -2.505386 | -3.945763 | -1.176660 | O      | -0.126870 | -1.190710 | -0.454814 | H      | 0.144101  | 4.571094  | 0.706499  |
| 66     |           |           |           | C      | -3.902048 | -1.274545 | -1.163822 | H      | -0.470561 | 4.351991  | -0.766705 |
| ArgCys |           |           |           | C      | -4.627804 | 0.547931  | 0.224332  | N      | 0.677076  | 0.870104  | 0.434989  |
| N      | -0.263168 | 3.984389  | 0.754270  | H      | -3.194594 | -1.692949 | -1.876507 | H      | 0.136239  | 0.510328  | 1.208809  |
| C      | -0.432542 | 2.540207  | 0.785803  | C      | -4.992650 | -2.031667 | -0.744217 | C      | 1.613824  | -0.040744 | -0.176667 |
| H      | -0.414562 | 2.212940  | 1.834525  | C      | -5.718219 | -0.205227 | 0.645506  | H      | 1.616400  | 0.170536  | -1.253195 |
| C      | -1.795738 | 2.186802  | 0.182443  | H      | -4.490819 | 1.558535  | 0.602481  | C      | 3.040339  | 0.162166  | 0.371920  |
| C      | 0.675708  | 1.831712  | 0.002846  | H      | -5.134005 | -3.036533 | -1.132161 | C      | 1.093690  | -1.448387 | 0.050245  |
| H      | -2.536810 | 2.813540  | 0.690646  | C      | -5.903465 | -1.498581 | 0.162703  | H      | 3.177630  | 1.244633  | 0.456322  |
| H      | -1.787550 | 2.495968  | -0.871252 | H      | -6.427873 | 0.219710  | 1.349604  | H      | 3.128220  | -0.243462 | 1.384999  |
| C      | -2.184891 | 0.717034  | 0.289512  | H      | -6.757484 | -2.085291 | 0.488326  | C      | 4.149051  | -0.415506 | -0.496288 |
| H      | -1.451905 | 0.096103  | -0.246056 | O      | -1.514261 | -1.046451 | 1.310684  | O      | 0.182794  | -1.728827 | 0.798060  |
| H      | -2.160515 | 0.392174  | 1.338131  | C      | -1.229981 | -2.411590 | 1.617405  | H      | 3.960039  | -1.474995 | -0.704168 |
| C      | -3.575995 | 0.458866  | -0.270807 | H      | -1.771447 | -2.626005 | 2.537485  | H      | 4.180894  | 0.093383  | -1.467549 |
| H      | -4.331850 | 1.020169  | 0.284849  | H      | -1.576862 | -3.061128 | 0.810168  | C      | 5.493912  | -0.330801 | 0.207763  |
| H      | -3.640240 | 0.813037  | -1.311778 | H      | -0.156666 | -2.557117 | 1.759690  | O      | 5.604995  | -0.402705 | 1.419986  |
| N      | -3.922142 | -0.943086 | -0.158857 | 68     |           |           |           | N      | 6.569342  | -0.212428 | -0.614711 |
| H      | -3.233395 | -1.573171 | -0.545307 | ArgGly |           |           |           | H      | 7.483026  | -0.163829 | -0.194688 |
| C      | -5.235725 | -1.323603 | -0.356254 | N      | 1.847919  | -3.875695 | -0.039810 | H      | 6.479039  | -0.088600 | -1.607472 |
| N      | -6.147422 | -0.440748 | -0.533280 | C      | 1.303114  | -2.587362 | -0.431082 | O      | 1.767724  | -2.354985 | -0.663467 |
| N      | -5.435428 | -2.695761 | -0.246274 | H      | 1.254327  | -2.551883 | -1.528448 | C      | 1.358813  | -3.710846 | -0.465619 |
| H      | -7.067452 | -0.875771 | -0.518831 | C      | -0.120641 | -2.448615 | 0.126007  | H      | 2.005472  | -4.310027 | -1.105125 |
| H      | -4.620833 | -3.289358 | -0.235854 | C      | 2.167497  | -1.430301 | 0.080178  | H      | 1.478791  | -3.998765 | 0.581114  |
| H      | -6.197725 | -3.063180 | -0.791863 | H      | -0.653552 | -3.368123 | -0.139622 | H      | 0.312328  | -3.838569 | -0.751375 |
| O      | 1.052588  | 2.254307  | -1.084914 | H      | -0.055099 | -2.425963 | 1.222303  | 70     |           |           |           |
| H      | 0.588245  | 4.236884  | 1.248162  | C      | -0.873563 | -1.223506 | -0.377156 | ArgIle |           |           |           |
| H      | -0.098878 | 4.243355  | -0.216941 | H      | -0.303507 | -0.313427 | -0.150935 | N      | -0.206436 | 4.110809  | 0.398012  |
| N      | 1.213690  | 0.725198  | 0.573117  | H      | -0.970942 | -1.265642 | -1.471125 | C      | -0.417043 | 2.680609  | 0.549831  |
| H      | 0.866752  | 0.355244  | 1.448346  | C      | -2.261313 | -1.084278 | 0.229397  | H      | -0.420812 | 2.442964  | 1.622597  |
| C      | 2.194973  | -0.080185 | -0.110210 | H      | -2.918189 | -1.906260 | -0.068672 | C      | -1.787221 | 2.310829  | -0.035621 |

|        |           |           |           |        |           |           |           |        |           |           |           |
|--------|-----------|-----------|-----------|--------|-----------|-----------|-----------|--------|-----------|-----------|-----------|
| C      | 0.686006  | 1.876671  | -0.148025 | O      | 1.808261  | -1.272113 | 1.757369  | N      | 4.024835  | -1.190224 | -0.589246 |
| H      | -2.497358 | 3.050245  | 0.350725  | N      | 4.724212  | -0.682544 | 0.632713  | H      | 3.145440  | -1.670858 | -0.457599 |
| H      | -1.745964 | 2.452773  | -1.124101 | C      | 5.004936  | 0.325113  | -1.272113 | C      | 5.159912  | -1.958370 | -0.448386 |
| C      | -2.271086 | 0.903298  | 0.293319  | H      | 4.357769  | -0.966192 | 1.528908  | N      | 6.239493  | -1.440258 | 0.010159  |
| H      | -1.558281 | 0.157839  | -0.087266 | C      | 5.815526  | -1.181432 | -0.006655 | N      | 5.014942  | -3.257326 | -0.930132 |
| H      | -2.312024 | 0.765976  | 1.382383  | N      | 6.014711  | -0.594481 | -1.161846 | H      | 7.011047  | -2.098174 | -0.079162 |
| C      | -3.650309 | 0.621198  | -0.284186 | H      | 4.917601  | 0.967911  | -2.137991 | H      | 4.077585  | -3.578854 | -1.117278 |
| H      | -4.389863 | 1.327107  | 0.104073  | H      | 6.429008  | -1.963550 | 0.420238  | H      | 5.588200  | -3.944591 | -0.468647 |
| H      | -3.644494 | 0.759265  | -1.376744 | O      | 1.686402  | -2.059209 | -0.346734 | O      | -0.184738 | 2.653182  | 1.475771  |
| N      | -4.090064 | -0.708055 | 0.086091  | C      | 1.833177  | -3.384702 | 0.168670  | H      | 0.594833  | 4.893112  | -0.378187 |
| H      | -3.399214 | -1.431113 | -0.056647 | H      | 1.738515  | -4.046764 | -0.690520 | H      | 1.324676  | 4.459663  | 0.993000  |
| C      | -5.393589 | -1.077513 | -0.178253 | H      | 2.815838  | -3.502395 | 0.631742  | N      | -0.506303 | 1.337562  | -0.348329 |
| N      | -6.222959 | -0.226695 | -0.658739 | H      | 1.061082  | -3.596635 | 0.911379  | H      | -0.082882 | 0.991533  | -1.197096 |
| N      | -5.689815 | -2.379894 | 0.211812  |        |           |           |           | C      | -1.495037 | 0.494064  | 0.279292  |
| H      | -7.164351 | -0.613782 | -0.658715 | 72     |           |           |           | H      | -1.746667 | 0.969120  | 1.232139  |
| H      | -4.919521 | -2.982062 | 0.457107  | ArgLeu |           |           |           | C      | -2.750242 | 0.375978  | -0.601042 |
| H      | -6.405219 | -2.836841 | -0.329641 | N      | 0.457059  | 4.402847  | 0.104817  | C      | -0.888257 | -0.873211 | 0.562314  |
| O      | 1.206216  | 2.280542  | -1.181891 | C      | 0.537106  | 3.016848  | -0.322060 | H      | -3.032996 | 1.400190  | -0.870544 |
| H      | 0.638097  | 4.376375  | 0.897266  | H      | 0.467577  | 2.987661  | -1.418507 | H      | -2.479956 | -0.129582 | -1.538686 |
| H      | 0.011904  | 4.271344  | -0.584215 | C      | 1.895465  | 2.435562  | 0.097246  | C      | -3.938059 | -0.327793 | 0.046799  |
| N      | 1.045828  | 0.704445  | 0.432742  | C      | -0.591231 | 2.173694  | 0.285269  | O      | -0.005973 | -1.381988 | -0.094934 |
| H      | 0.516745  | 0.325826  | 1.206630  | H      | 2.658530  | 3.153400  | -0.222867 | H      | -3.675634 | -1.362192 | 0.299776  |
| C      | 1.964489  | -0.200361 | -0.217853 | H      | 1.927983  | 2.407888  | 1.195010  | H      | -4.171983 | 0.164623  | 1.000316  |
| H      | 1.830439  | -0.105995 | -1.302897 | C      | 2.185003  | 1.051270  | -0.468510 | C      | -5.172291 | 0.317356  | -0.848404 |
| C      | 3.441020  | 0.154913  | 0.102722  | H      | 1.380437  | 0.358856  | -0.191271 | H      | -5.458951 | -0.712156 | -1.094785 |
| C      | 1.569042  | -1.602520 | 0.202313  | H      | 2.197783  | 1.088936  | -1.566763 | H      | -4.934268 | -0.807298 | -1.804184 |
| H      | 3.476334  | 1.239175  | -0.067538 | C      | 3.502450  | 0.465400  | 0.015647  | C      | -6.372506 | -1.010549 | -0.218862 |
| C      | 3.775096  | -0.121417 | 1.565443  | H      | 4.359220  | 1.041341  | -0.345435 | H      | -6.085626 | -2.041793 | 0.060579  |
| C      | 4.430109  | -0.487879 | -0.874119 | H      | 3.554447  | 0.498680  | 1.115383  | H      | -6.626573 | -0.499037 | 0.182488  |
| O      | 0.768951  | -1.850275 | 1.078871  | N      | 3.637146  | -0.887442 | -0.483411 | N      | -7.528619 | -0.928506 | -1.100023 |
| H      | 3.820961  | -1.198539 | 1.768298  | H      | 2.795244  | -1.441504 | -0.404618 | H      | -7.362557 | -1.482631 | -1.934781 |
| H      | 4.743794  | 0.305494  | 1.837863  | C      | 4.823490  | -1.560589 | -0.289364 | H      | -8.341731 | -1.333446 | -0.648325 |
| H      | 3.025029  | 0.317071  | 2.230865  | N      | 5.830119  | -0.962697 | 0.233760  | O      | -1.464607 | -0.463738 | 1.612546  |
| H      | 4.466495  | -1.570611 | -0.709189 | N      | 4.814014  | -2.859063 | -0.794007 | C      | -0.974695 | -2.768842 | 1.924438  |
| H      | 4.052980  | -0.347294 | -1.895352 | H      | 6.657175  | -1.553602 | 0.179059  | H      | -1.553776 | -3.104643 | 2.783567  |
| C      | 5.835405  | 0.096337  | -0.781771 | H      | 3.917268  | -3.255282 | -1.030743 | H      | -1.113822 | -3.445368 | 1.077786  |
| H      | 6.296768  | -0.095501 | 0.192009  | H      | 5.418915  | -3.503113 | -0.103444 | H      | 0.088291  | -2.726964 | 2.173366  |
| H      | 6.489212  | -0.340664 | -1.542556 | O      | -1.009625 | 2.397252  | 1.412481  |        |           |           |           |
| H      | 5.824220  | 1.180685  | -0.937745 | H      | -0.390919 | 4.819366  | -0.269715 | 74     |           |           |           |
| O      | 2.205616  | -2.540380 | -0.501830 | H      | 0.320149  | 4.393496  | 1.114193  | ArgMet |           |           |           |
| C      | 1.897721  | -3.887322 | -0.137306 | N      | -1.096404 | 1.180352  | -0.503284 | N      | 0.946148  | 4.312083  | -0.040931 |
| H      | 2.507489  | -4.514807 | -0.785882 | H      | -0.593944 | 0.937639  | -1.344658 | C      | 1.022079  | 2.895722  | -0.353700 |
| H      | 2.140572  | -4.066972 | 0.912449  | C      | -2.019632 | 0.199512  | 0.015031  | H      | 0.996668  | 2.780862  | -1.446178 |
| H      | 0.836069  | -4.092381 | -0.293374 | H      | -2.459701 | 0.636979  | 0.914419  | C      | 2.356135  | 2.335425  | 0.162874  |
|        |           |           |           | C      | -3.100451 | -0.112055 | -1.032513 | C      | -0.145501 | 2.119860  | 0.267002  |
| 71     |           |           |           | C      | -1.265771 | 1.063710  | 0.410272  | H      | 3.128359  | 3.050135  | -0.142046 |
| ArgHis |           |           |           | H      | -3.547860 | 0.849861  | -1.313837 | H      | 2.332917  | 2.346209  | 1.261073  |
| N      | -1.200942 | 4.115550  | 0.520159  | H      | -2.601822 | -0.500604 | -1.931559 | C      | 2.702491  | 0.940461  | -0.344521 |
| C      | -1.278835 | 2.667318  | 0.629344  | O      | -4.211291 | -1.082101 | -0.616831 | H      | 1.915736  | 0.227102  | -0.064153 |
| H      | -1.241149 | 2.400183  | 1.694821  | C      | -0.268646 | -1.472125 | -0.144236 | H      | 2.743210  | 0.943256  | -1.442511 |
| C      | -2.616821 | 2.196648  | 0.052466  | H      | -3.752975 | -2.046320 | -0.356693 | C      | 4.034691  | 0.436150  | 0.188455  |
| C      | -0.129720 | 1.988306  | -0.119757 | C      | -4.987147 | -0.585589 | 0.601092  | H      | 4.854985  | 1.097092  | -0.106213 |
| H      | -3.400246 | 2.769829  | 0.560539  | C      | -5.148248 | -1.314388 | -1.800550 | H      | 4.030908  | 0.429200  | 1.289512  |
| H      | -2.645760 | 2.487520  | -1.005966 | H      | -5.416775 | 0.405557  | 0.411953  | N      | 4.314953  | -0.876803 | -0.354382 |
| C      | -2.881297 | 0.701373  | 0.182712  | H      | -5.813290 | -1.264459 | 0.835819  | H      | 3.523063  | -1.504294 | -0.360503 |
| H      | -2.123159 | 0.140086  | -0.382185 | H      | -4.354501 | -0.519257 | 1.490432  | C      | 5.538463  | -1.459645 | -0.099196 |
| H      | -2.786033 | 0.384230  | 1.229608  | H      | -4.608247 | -1.696242 | -2.673524 | N      | 6.443330  | -0.810862 | 0.536113  |
| C      | -4.270700 | 0.329566  | -0.315909 | H      | -5.930177 | -2.037059 | -1.547113 | N      | 5.681918  | -2.720915 | -0.669978 |
| H      | -5.046559 | 0.795400  | 0.296730  | H      | -5.642354 | -0.381154 | -2.095872 | H      | 7.323087  | -1.322425 | 0.516354  |
| H      | -4.421139 | 0.708985  | -1.339155 | O      | -1.856499 | -1.692027 | 1.430540  | H      | 4.852023  | -3.169462 | -1.025548 |
| N      | -4.482921 | -1.100941 | -0.240379 | C      | -1.235024 | -2.911051 | 1.841257  | H      | 6.298996  | -3.345174 | -0.176604 |
| H      | -3.817208 | -1.649139 | -0.766117 | H      | -1.841673 | -3.290416 | 2.662312  | O      | -0.641040 | 2.464535  | 1.331644  |
| C      | -5.773667 | -1.593790 | -0.234947 | H      | -1.211551 | -3.627857 | 1.016919  | H      | 0.123888  | 4.707908  | -0.488202 |
| N      | -6.775335 | -0.797055 | -0.173741 | H      | -0.212629 | -2.722394 | 2.176776  | H      | 0.758521  | 4.384856  | 0.957707  |
| N      | -5.832944 | -2.983907 | -0.204730 |        |           |           |           | N      | -0.590314 | 1.036065  | -0.428146 |
| H      | -7.636633 | -1.321340 | -0.036713 | 73     |           |           |           | H      | -0.052832 | 0.692371  | -1.211524 |
| H      | -4.988806 | -3.492075 | -0.418757 | ArgLys |           |           |           | C      | -1.550785 | 0.124170  | 0.142315  |
| H      | -6.656219 | -3.381860 | -0.626818 | N      | 1.410494  | 4.403598  | -0.020549 | H      | -1.658276 | 0.394397  | 1.199128  |
| O      | 0.184219  | 2.336898  | -1.250385 | C      | 1.314270  | 2.997532  | -0.372279 | C      | -2.922784 | 0.259003  | -0.550365 |
| H      | -0.364384 | 4.449732  | 0.990232  | H      | 1.171376  | 2.921658  | -1.459226 | C      | -0.982717 | -1.280957 | 0.041379  |
| H      | -1.065465 | 4.334576  | -0.465009 | C      | 2.627201  | 2.291524  | -0.002747 | H      | -3.124934 | 1.333806  | -0.603085 |
| N      | 0.506213  | 0.977622  | 0.531893  | C      | 0.142087  | 2.317418  | 0.354985  | H      | -2.847124 | -0.101014 | -1.583826 |
| H      | 0.303245  | 0.787776  | 1.502389  | H      | 3.438567  | 2.908142  | -0.404640 | C      | -4.072997 | -0.432863 | 0.168455  |
| C      | 1.633799  | 0.291451  | -0.058445 | H      | 2.728748  | 2.309378  | 1.090897  | O      | -0.061022 | -1.595731 | -0.679383 |
| H      | 1.462745  | 0.215006  | -1.133812 | C      | 2.736227  | 0.861220  | -0.515444 | H      | -3.922387 | -1.515209 | 0.208553  |
| C      | 2.956266  | 1.050458  | 0.204687  | H      | 1.897698  | 0.261456  | -0.139311 | H      | -4.147456 | -0.064196 | 1.198402  |
| C      | 1.709286  | -1.089159 | 0.560547  | H      | 2.659201  | 0.849445  | -1.611765 | S      | -5.625444 | -0.077693 | -0.708673 |
| H      | 2.904951  | 1.985267  | -0.359420 | C      | 4.032902  | 0.176905  | -0.111709 | C      | -6.769967 | -1.016364 | 0.327956  |
| H      | 2.980852  | 1.309522  | 1.270289  | H      | 4.903710  | 0.676656  | -0.545724 | H      | -6.778233 | -0.639363 | 1.354389  |
| C      | 4.184574  | 0.298785  | -0.171417 | H      | 4.167640  | 0.223984  | 0.980327  | H      | -7.767482 | -0.888979 | -0.097908 |

|        |           |           |           |        |           |           |           |        |           |           |           |
|--------|-----------|-----------|-----------|--------|-----------|-----------|-----------|--------|-----------|-----------|-----------|
| H      | -6.524790 | -2.082183 | 0.329259  | H      | -1.152429 | 0.600996  | -1.340242 | H      | -1.586035 | 1.259499  | 1.478351  |
| O      | -1.630216 | -2.140122 | 0.832612  | C      | -2.538822 | -0.389014 | -0.126656 | C      | -3.040160 | 0.941602  | -0.066140 |
| C      | -1.171045 | -3.492565 | 0.768024  | H      | -3.042745 | -0.114976 | 0.802446  | H      | -3.749949 | 1.668419  | 0.338934  |
| H      | -1.808067 | -4.053337 | 1.450537  | C      | -3.565380 | -0.799888 | -1.182915 | H      | -3.119496 | 1.015545  | -1.162325 |
| H      | -1.259555 | -3.880400 | -0.249304 | C      | -1.577492 | -1.541329 | 0.131408  | N      | -3.432839 | -0.369749 | 0.406547  |
| H      | -0.126521 | -3.554902 | 1.081668  | H      | -4.271166 | 0.034413  | -1.305656 | H      | -2.727388 | -1.081672 | 0.274455  |
| 75     |           |           |           | H      | -3.038020 | -0.941118 | -2.140702 | C      | -4.739523 | -0.777077 | 0.257176  |
| ArgPro |           |           |           | O      | -4.190233 | -1.982456 | -0.750355 | N      | -5.625957 | 0.033375  | -0.192852 |
| N      | -0.076418 | -1.555462 | -2.339843 | O      | -0.608255 | -1.769149 | -0.563188 | N      | -4.975658 | -2.069581 | 0.723418  |
| C      | 0.200450  | -1.044248 | -1.007727 | H      | -4.821127 | -2.253176 | -1.423168 | H      | -6.552637 | -0.379922 | -0.110798 |
| H      | 0.265696  | 0.045797  | -1.075192 | O      | -1.927554 | -2.260742 | 1.191075  | H      | -4.168003 | -2.650825 | 0.889166  |
| C      | -0.946212 | -1.402146 | -0.051016 | C      | -1.106712 | -3.397886 | 1.456952  | H      | -5.720116 | -2.554738 | 0.248732  |
| C      | 1.490838  | -1.646515 | -0.441850 | H      | -1.540522 | -3.876554 | 2.333622  | O      | 1.696487  | 1.866313  | -1.621021 |
| H      | -1.047995 | -2.496334 | -0.048995 | H      | -1.112519 | -4.080507 | 0.604016  | H      | 1.703938  | 4.356931  | 0.081464  |
| H      | -0.671019 | -1.117177 | 0.974299  | H      | -0.078173 | -3.089150 | 1.659681  | N      | 0.852373  | 4.111824  | -1.266723 |
| C      | -2.262045 | -0.740585 | -0.436014 | 77     |           |           |           | N      | 1.619713  | 0.662886  | 0.299348  |
| H      | -2.173885 | 0.348332  | -0.342877 | ArgTyr |           |           |           | H      | 1.200768  | 0.550023  | 1.209995  |
| H      | -2.471044 | -0.968017 | -1.488028 | N      | 2.647228  | 4.364185  | 0.043885  | C      | 2.332764  | -0.460927 | -0.234008 |
| C      | -3.418151 | -1.196933 | 0.448187  | C      | 2.297899  | 3.017149  | -0.370544 | H      | 2.714740  | -0.153161 | -1.214191 |
| H      | -3.557225 | -2.281914 | 0.363578  | H      | 2.272843  | 2.987484  | -1.468862 | C      | 3.504428  | -0.860714 | 0.670156  |
| H      | -3.197840 | -0.970633 | 1.495364  | C      | 3.378649  | 2.040218  | 0.118916  | C      | 1.397673  | -1.647485 | -0.453482 |
| N      | -4.686797 | -0.562515 | 0.143570  | C      | 0.931815  | 2.591360  | 0.182485  | H      | 3.982648  | -1.740569 | 0.216414  |
| C      | -5.038398 | -0.748350 | -0.785638 | H      | 4.343886  | 2.468695  | -0.171941 | C      | 4.522334  | 0.254704  | 0.825281  |
| C      | -4.911109 | 0.732366  | 0.566751  | H      | 3.355803  | 2.029761  | 1.217131  | O      | 2.902941  | -1.205952 | 1.908756  |
| N      | -4.075775 | 1.334221  | 1.330451  | C      | 3.235223  | 0.622514  | -0.420155 | O      | 0.217058  | -1.673128 | -0.198773 |
| N      | -6.101171 | 1.246966  | 0.048460  | H      | 2.247621  | 0.221249  | -0.161591 | H      | 4.049078  | 1.147092  | 1.242754  |
| H      | -4.455051 | 2.225355  | 1.642636  | H      | 3.289531  | 0.630329  | -1.517875 | H      | 5.331207  | -0.057018 | 1.495437  |
| H      | -6.857524 | 0.576824  | 0.015382  | C      | 4.287731  | -0.336971 | 0.113153  | H      | 4.970831  | 0.514948  | -0.138091 |
| H      | -6.388320 | 2.115232  | 0.474192  | H      | 5.292886  | -0.058954 | -0.216530 | H      | 3.601289  | -1.419240 | 2.535182  |
| O      | 1.779196  | -2.811008 | -0.694880 | H      | 4.309370  | -0.308660 | 1.213910  | O      | 2.063123  | -2.676082 | -0.992726 |
| H      | 0.579200  | -1.129066 | -2.989051 | N      | 4.012061  | -1.670259 | -0.380315 | C      | 1.278116  | -3.841370 | -1.243834 |
| H      | 0.171130  | -2.544333 | -2.321167 | H      | 3.035469  | -1.929857 | -0.348709 | H      | 1.957400  | -4.566447 | -1.690552 |
| N      | 2.251162  | -0.902106 | 0.406623  | C      | 4.914978  | -2.679935 | -0.128246 | H      | 0.861365  | -4.230141 | -1.311602 |
| C      | 3.389727  | -1.496824 | 1.095092  | N      | 6.031342  | -2.421014 | 0.447101  | H      | 0.459229  | -3.610936 | -1.929405 |
| C      | 2.104672  | 0.508832  | 0.701895  | N      | 4.521845  | -3.916109 | -0.635856 | 79     |           |           |           |
| H      | 4.285617  | -1.473698 | 0.459171  | H      | 6.632701  | -3.242199 | 0.434609  | ArgTrp |           |           |           |
| H      | 3.168932  | -2.541324 | 1.321669  | H      | 3.558558  | -4.013673 | -0.918247 | N      | -2.265551 | 4.472579  | 0.134922  |
| C      | 3.541171  | -0.596453 | 2.313775  | H      | 4.869871  | -4.711262 | -0.124874 | C      | -2.179917 | 3.069211  | 0.497234  |
| C      | 3.205380  | 0.785906  | 1.756230  | O      | 0.539228  | 2.984523  | 1.271124  | H      | -2.267983 | 2.987378  | 1.589664  |
| H      | 1.113760  | 0.736746  | 1.115764  | H      | 2.002633  | 5.022721  | -0.384551 | C      | -3.352208 | 2.308149  | -0.142921 |
| C      | 2.312763  | 1.394474  | -0.518674 | H      | 2.456254  | 4.424592  | 1.042705  | C      | -0.852028 | 2.447328  | 0.044674  |
| H      | 4.539855  | -0.640010 | 2.755866  | N      | 0.193981  | 1.758729  | -0.610848 | H      | -4.256264 | 2.887830  | 0.073052  |
| H      | 2.815451  | -0.886090 | 3.081500  | H      | 0.648899  | 1.338673  | -1.408863 | H      | -3.217905 | 2.327158  | -1.233038 |
| H      | 4.087342  | 1.210743  | 1.264315  | C      | -0.991601 | 1.097157  | -0.121708 | C      | -3.508051 | 0.872124  | 0.341148  |
| H      | 2.870728  | 1.503691  | 2.507252  | H      | -1.335324 | 1.658143  | 0.750285  | H      | -2.581352 | 0.313539  | 0.160975  |
| O      | 2.650641  | 1.024802  | -1.616391 | C      | -2.077528 | 1.065363  | -1.216113 | H      | -3.672188 | 0.858481  | 1.427769  |
| O      | 2.078555  | 2.673339  | -0.193449 | C      | -0.659002 | -0.326151 | 0.306623  | C      | -4.647486 | 0.124005  | -0.332900 |
| C      | 2.260661  | 3.610903  | -1.255078 | H      | -2.292740 | 2.105703  | -1.482606 | H      | -5.617937 | 0.572392  | -0.100885 |
| H      | 1.589659  | 3.383226  | -2.086733 | H      | -1.647523 | 0.588056  | -2.105284 | H      | -4.543489 | 0.171980  | -1.428126 |
| H      | 2.026850  | 4.587088  | -0.831919 | C      | -3.335012 | 0.342987  | -0.812455 | N      | -4.665152 | -1.244351 | 0.141506  |
| H      | 3.291061  | 3.586437  | -1.617877 | O      | 0.086401  | -1.060584 | -0.308610 | H      | -3.750376 | -1.665906 | 0.227663  |
| 76     |           |           |           | C      | -3.564706 | -0.975254 | -1.206766 | C      | -5.682183 | -2.082025 | -0.260721 |
| ArgSer |           |           |           | C      | -4.295634 | 0.962653  | -0.008638 | N      | -6.650911 | -1.629651 | -0.968633 |
| N      | -0.905183 | 4.221487  | 0.155849  | H      | -2.836602 | -1.480658 | -1.837227 | N      | -5.574291 | -3.372683 | 0.251800  |
| C      | -0.575265 | 2.877990  | -0.283962 | C      | -4.710683 | -1.659246 | -0.811941 | H      | -7.378113 | -2.335781 | -1.062037 |
| H      | -0.559938 | 2.867351  | -1.382786 | H      | -5.443203 | 0.296207  | 0.395613  | H      | -4.691448 | -3.634288 | 0.663136  |
| C      | 0.828180  | 2.507873  | 0.223875  | C      | -4.143311 | 1.991341  | 0.312700  | H      | -5.974195 | -4.092404 | -0.328235 |
| C      | -1.599195 | 1.851232  | 0.218408  | H      | -4.872922 | -2.684800 | -1.138128 | O      | -0.286623 | 2.833074  | -0.968440 |
| H      | 1.478953  | 3.355055  | -0.018528 | C      | -5.655603 | -1.024017 | -0.007026 | H      | -1.565336 | 4.993638  | 0.655469  |
| H      | 0.791559  | 2.441854  | 1.319724  | H      | -6.189582 | 0.780231  | 1.016864  | H      | -1.972149 | 4.544862  | -0.837948 |
| C      | 1.390791  | 1.218856  | -0.360646 | O      | -6.795211 | -1.630174 | 0.410868  | N      | -0.353981 | 1.451670  | 0.834844  |
| H      | 0.723443  | 0.378751  | -0.131664 | H      | -6.825071 | -2.523816 | 0.054543  | H      | -0.948018 | 1.073203  | 1.559032  |
| H      | 1.434654  | 1.291963  | -1.456449 | O      | -1.309771 | -0.675365 | 1.412748  | C      | 0.745167  | 0.618214  | 0.410041  |
| C      | 2.778143  | 0.874393  | 0.158658  | C      | -1.130151 | -2.028429 | 1.830367  | H      | 1.180174  | 1.087270  | -0.475241 |
| H      | 3.514524  | 1.630784  | -0.127966 | H      | -1.505254 | -2.713528 | 1.066130  | C      | 1.797034  | 0.494139  | 1.533137  |
| H      | 2.780703  | 0.848299  | 1.259614  | H      | -0.073170 | -2.237006 | 2.011529  | C      | 0.221731  | -0.760114 | 0.037336  |
| N      | 3.199503  | -0.390533 | -0.406427 | H      | -1.704221 | -2.132131 | 2.749883  | H      | 2.099450  | 1.516128  | 1.790993  |
| H      | 2.477535  | -1.097710 | -0.428449 | 78     |           |           |           | H      | 1.302328  | 0.076665  | 2.418632  |
| C      | 4.479637  | -0.840173 | -0.165475 | ArgThr |           |           |           | C      | 2.985523  | -0.337155 | 1.181111  |
| N      | 5.314111  | -0.103754 | 0.471326  | N      | 0.768380  | 4.141381  | -0.251991 | O      | -0.673505 | -1.326054 | 0.631242  |
| N      | 4.754306  | -2.073194 | -0.750984 | C      | 0.403999  | 2.802145  | 0.178586  | C      | 3.301420  | -1.567284 | 1.694150  |
| H      | 6.242811  | -0.519508 | 0.443787  | H      | 0.506604  | 2.750180  | 1.271623  | C      | 4.269583  | 1.082269  | -0.600821 |
| H      | 3.970920  | -2.609824 | -1.090428 | C      | -1.062017 | 2.531694  | -0.188637 | C      | 4.020059  | -0.016498 | 0.234540  |
| H      | 5.441131  | -2.628444 | -0.267014 | C      | 1.297564  | 1.739320  | -0.470721 | H      | 2.779613  | -2.152419 | 2.439502  |
| O      | -2.188679 | 2.009922  | 1.276322  | H      | -1.641001 | 3.392130  | 0.164414  | N      | 4.463115  | -2.030895 | 1.124934  |
| H      | -1.773551 | 4.511756  | -0.285045 | H      | -1.139687 | 2.525115  | -1.284363 | C      | 4.931438  | -1.101232 | 0.229544  |
| H      | -1.126245 | 4.162377  | 1.148457  | C      | -1.615157 | 1.231964  | 0.380160  | C      | 5.398412  | 1.072190  | -1.402917 |
| N      | -1.806357 | 0.765202  | -0.587189 | H      | -0.979628 | 0.392438  | 0.072734  | H      | 3.590478  | 1.930595  | -0.619552 |
|        |           |           |           |        |           |           |           | H      | 4.920735  | -2.893639 | 1.360894  |

|        |           |           |           |        |           |           |           |        |           |           |            |
|--------|-----------|-----------|-----------|--------|-----------|-----------|-----------|--------|-----------|-----------|------------|
| C      | 6.070517  | -1.115776 | -0.576675 | C      | 1.605193  | -0.884534 | -0.899250 | H      | -1.752488 | -1.862678 | 0.477072   |
| C      | 6.289111  | -0.015954 | -1.390688 | C      | 1.055017  | 1.462426  | -0.136413 | C      | -2.110303 | -0.604952 | 2.197250   |
| H      | 5.601733  | 1.916930  | -2.054096 | H      | 1.201881  | -1.900300 | -0.824897 | C      | -1.913982 | 0.135856  | -0.200633  |
| H      | 6.760710  | -1.954738 | -0.567338 | H      | 1.567769  | -0.562269 | -1.941836 | H      | -1.818245 | 0.377730  | 2.582353   |
| H      | 7.165840  | 0.006074  | -2.031162 | C      | 3.049959  | -0.925509 | -0.471744 | H      | -3.197828 | -0.629961 | 2.104788   |
| O      | 0.876535  | -1.279841 | -0.997173 | O      | 0.320291  | 2.323014  | -0.558724 | H      | -1.797507 | -1.362560 | 2.919693   |
| C      | 0.493717  | -2.604896 | -1.362614 | O      | 3.997349  | -0.746456 | -1.198703 | O      | -1.215485 | 0.968498  | -0.729157  |
| H      | 0.654728  | -3.292899 | -0.529095 | O      | 2.308622  | 1.680503  | 0.272923  | O      | -3.220912 | -0.010257 | -0.457351  |
| H      | -0.560429 | -2.633938 | -1.649056 | C      | 2.767751  | 3.025437  | 0.130026  | C      | -3.750654 | 0.888832  | -1.429682  |
| H      | 1.126481  | -2.872384 | -2.207561 | H      | 3.800807  | 3.022600  | 0.474732  | H      | -4.806259 | 0.636410  | -1.525167  |
| 80     |           |           |           | H      | 2.713468  | 3.338998  | -0.914836 | H      | -3.632888 | 1.924873  | -1.102233  |
| ArgVal |           |           |           | H      | 2.160724  | 3.702652  | 0.735415  | H      | -3.238858 | 0.762335  | -2.386764  |
| N      | 0.090633  | 4.137439  | 0.310970  | O      | 3.160889  | -1.232734 | 0.831445  | 84     |           |           |            |
| C      | -0.103565 | 2.707645  | 0.485423  | C      | 4.496631  | -1.283848 | 1.322316  | AsnArg |           |           |            |
| H      | -0.080377 | 2.483855  | 1.560931  | H      | 4.983586  | -0.311489 | 1.210778  | N      | 4.007884  | -2.909970 | -0.005950  |
| C      | -1.483933 | 2.317506  | -0.062631 | H      | 4.417253  | -1.552038 | 2.375522  | C      | 3.538086  | -1.564361 | 0.274041   |
| C      | 0.990910  | 1.904166  | -0.226600 | H      | 5.080413  | -2.031395 | 0.779612  | H      | 3.498099  | -1.408249 | 1.357431   |
| H      | -2.190518 | 3.058324  | 0.327473  | 82     |           |           |           | C      | 4.539928  | -0.547775 | -0.285321  |
| H      | -1.469574 | 2.440593  | -1.154069 | AsnGlu |           |           |           | C      | 2.134991  | -1.327185 | -0.314686  |
| C      | -1.948952 | 0.912686  | 0.302463  | N      | -2.800518 | -3.254910 | 0.287674  | H      | 5.540192  | -0.974592 | -0.143174  |
| H      | -1.240724 | 0.165276  | -0.082528 | C      | -2.631064 | -1.871884 | -0.120541 | H      | 4.407537  | -0.418142 | -1.367340  |
| H      | -1.961944 | 0.794836  | 1.394558  | H      | -2.589639 | -1.816148 | -1.213729 | C      | 4.485334  | 0.800791  | 0.408179   |
| C      | -3.339649 | 0.609893  | -0.235817 | C      | -3.852584 | -1.057245 | 0.321785  | O      | 3.753160  | 1.035200  | 1.361546   |
| H      | -4.074978 | 1.317744  | 0.157082  | C      | -1.334387 | -1.272530 | 0.453916  | N      | 5.329510  | -1.737130 | -0.687655  |
| H      | -3.361597 | 0.727141  | -1.330568 | H      | -4.725192 | -1.713954 | 0.221896  | H      | 5.355425  | 2.637697  | 0.361745   |
| N      | -3.759111 | -0.715661 | 0.169710  | H      | -3.785341 | -0.789118 | 1.384235  | H      | 5.966581  | 1.543038  | -0.840231  |
| C      | -3.061831 | -1.433855 | 0.033587  | C      | -4.082982 | 0.190645  | -0.509967 | O      | 1.690153  | -2.073953 | -1.183494  |
| C      | -5.061687 | -1.104901 | -0.069481 | C      | -3.366143 | 0.511925  | -1.450113 | H      | -3.524941 | -3.553378 | 0.614253   |
| N      | -5.905955 | -0.273800 | -0.558491 | N      | -5.160345 | 0.929589  | -0.153212 | H      | 3.658186  | -3.150246 | -0.933405  |
| N      | -5.338847 | -2.401089 | 0.353630  | H      | -5.375530 | 1.747441  | -0.699672 | N      | 1.456165  | -0.264096 | 0.160326   |
| H      | -6.843090 | -0.670585 | -0.538217 | H      | -5.789505 | 0.646565  | 0.577628  | C      | 1.893458  | 0.354765  | 0.839862   |
| H      | -4.558974 | -2.989202 | 0.602711  | O      | -0.755066 | -1.818344 | 1.389602  | H      | 0.146010  | 0.064017  | -0.352479  |
| H      | -6.056000 | -2.877843 | -0.168075 | H      | -2.160736 | -3.830099 | -0.252357 | H      | 0.121844  | -0.169772 | -1.422260  |
| O      | 1.494260  | 2.305474  | -1.269624 | H      | -2.448722 | -3.321848 | 1.242457  | C      | -0.950436 | -0.760195 | 0.351185   |
| H      | 0.942794  | 4.416678  | 0.789348  | N      | -0.895271 | -0.129825 | -0.113073 | C      | -0.071811 | 1.549898  | -0.155692  |
| H      | 0.288012  | 4.287304  | -0.677348 | H      | -1.449498 | 0.322690  | -0.837992 | H      | -0.628773 | -1.805199 | 0.270085   |
| N      | 1.362505  | 0.734421  | 0.352552  | C      | 0.290737  | 0.522253  | 0.386796  | H      | -0.945532 | -0.501044 | 1.171574   |
| H      | 0.844150  | 0.356916  | 1.134115  | H      | 0.319739  | 0.411174  | 1.477052  | C      | -2.351043 | -0.604870 | -0.228058  |
| C      | 2.269309  | -0.172079 | -0.312101 | C      | 1.561720  | -0.127658 | -0.197546 | O      | 0.456696  | 2.209291  | 0.708785   |
| H      | 2.132893  | -0.061191 | -1.395057 | C      | 0.197083  | 1.993596  | 0.036696  | H      | -2.712183 | 0.421250  | -0.117077  |
| C      | 3.749349  | 0.165183  | 0.009124  | H      | 1.449612  | -1.203662 | -0.043424 | H      | -2.329643 | -0.372556 | -1.304087  |
| C      | 1.862466  | -1.575888 | 0.090924  | H      | 1.581565  | 0.050105  | -1.279392 | C      | -3.347584 | -1.530921 | 0.465463   |
| H      | 3.796083  | 1.248905  | -0.154218 | C      | 2.863488  | 0.335972  | 0.451776  | H      | -3.028999 | -2.576270 | 0.370471   |
| C      | 4.095545  | -0.123229 | 1.466087  | O      | -0.479250 | 2.443940  | -0.857485 | H      | -3.387444 | -1.290692 | 1.531836   |
| C      | 4.735309  | -0.488722 | -0.953056 | H      | 3.030933  | 1.407319  | 0.333305  | N      | -4.703543 | -1.434865 | -0.037904  |
| O      | 1.067142  | -1.828098 | 0.970598  | H      | 2.820701  | 0.134064  | 1.530450  | H      | -4.825167 | -1.733710 | -0.995492  |
| H      | 4.105934  | -1.200791 | 1.670270  | C      | 4.090469  | -0.357666 | -0.085652 | C      | -5.476170 | -0.342334 | 0.302897   |
| H      | 5.090052  | 0.263548  | 1.707912  | O      | 5.126171  | 0.191565  | -0.378558 | N      | -5.053532 | 0.529526  | 1.141465   |
| H      | 3.379723  | 0.344910  | 2.148749  | O      | 0.980669  | 2.738662  | 0.827439  | N      | -6.692765 | -0.326538 | -1.3081904 |
| H      | 4.483475  | -0.263167 | -1.994323 | C      | 0.993824  | 4.133820  | 0.518804  | H      | -5.790753 | 1.190936  | 1.374340   |
| H      | 5.745063  | -0.110475 | -0.764886 | H      | 1.677761  | 4.588245  | 1.234469  | H      | -7.114582 | -1.250584 | -0.476257  |
| H      | 4.755587  | -1.575796 | -0.839105 | H      | 1.341682  | 4.298645  | -0.503633 | H      | -7.350800 | 0.345853  | -0.036865  |
| O      | 2.483630  | -2.510099 | -0.631864 | H      | -0.008076 | 4.556924  | 0.6211784 | O      | -0.946664 | 2.042378  | -1.040825  |
| C      | 2.162225  | -3.858960 | -0.286234 | O      | 3.909777  | -1.686658 | -0.181872 | C      | -1.277794 | 3.418889  | -0.854841  |
| H      | 2.761271  | -4.483303 | -0.947703 | C      | 5.040394  | -2.412667 | -0.657506 | H      | -1.985737 | 3.661996  | -1.646307  |
| H      | 2.408267  | -4.057701 | 0.759326  | H      | 4.730959  | -3.456980 | -0.690678 | H      | -1.732641 | 3.574240  | 0.126343   |
| H      | 1.097505  | -4.049306 | -0.440049 | H      | 5.331487  | -2.066811 | -1.652472 | H      | -0.383877 | 4.042312  | -0.932331  |
| 81     |           |           |           | H      | 5.891288  | -2.287073 | 0.016881  | 85     |           |           |            |
| AsnAsp |           |           |           | 83     |           |           |           | AsnAsn |           |           |            |
| N      | -3.382479 | -2.665752 | -0.381617 | AsnAla |           |           |           | N      | -3.209900 | -2.569459 | -0.461885  |
| C      | -2.864949 | -1.309649 | -0.415217 | N      | 3.011439  | -1.852400 | -0.872813 | C      | -2.626164 | -1.239995 | -0.479024  |
| H      | -2.987100 | -0.896753 | -1.422285 | C      | 2.199121  | -0.947918 | -0.079447 | H      | -2.688435 | -0.825048 | -1.490697  |
| C      | -3.687813 | -0.428470 | 0.531936  | H      | 2.584257  | -0.909400 | 0.945295  | C      | -3.440632 | -0.314554 | 0.432336   |
| C      | -1.372757 | -1.269083 | -0.040978 | C      | 2.299064  | 0.468852  | -0.662259 | C      | -1.150009 | -1.268902 | -0.041563  |
| H      | -4.725504 | -0.777480 | 0.468989  | C      | 0.724056  | -1.372456 | -0.059808 | H      | -4.492282 | -0.606640 | 0.325676   |
| H      | -3.374557 | -0.570101 | 1.574537  | H      | 3.335346  | 0.608229  | -0.992064 | H      | -3.178893 | -0.470106 | 1.487006   |
| C      | -3.646159 | 1.046032  | 0.176224  | H      | 1.663221  | 0.561563  | -1.551593 | C      | -3.306958 | 1.154126  | 0.074295   |
| O      | -3.030356 | 1.485343  | -0.787319 | C      | 1.950455  | 1.574024  | 0.316039  | O      | -2.669408 | 1.549824  | -0.894350  |
| N      | -4.361157 | 1.855560  | 0.992957  | O      | 1.669650  | 1.374684  | 1.494841  | N      | -3.973485 | 2.008739  | 0.885184   |
| H      | -4.391288 | 2.838764  | 0.778069  | N      | 2.030585  | 2.827843  | -0.186786 | H      | -3.908345 | 2.994579  | 0.691436   |
| H      | -4.910978 | 1.500977  | 1.755835  | H      | 1.720257  | 3.584494  | 0.400894  | H      | -4.491044 | 1.696779  | 1.688117   |
| O      | -0.849876 | -2.212725 | 0.547168  | H      | 2.115123  | 2.990673  | -1.175409 | O      | -0.700884 | -2.235722 | 0.569114   |
| H      | -3.040549 | -3.161655 | -1.199496 | O      | 0.265693  | -2.098094 | -0.933713 | H      | -2.859516 | -3.084676 | -1.264138  |
| H      | -2.927760 | -3.133345 | 0.402101  | H      | 3.157614  | -2.705264 | -0.340699 | H      | -2.806550 | -3.053580 | 0.339952   |
| N      | -0.691971 | -0.156077 | -0.384967 | H      | 2.433995  | -2.142660 | -1.661760 | N      | -0.406100 | -0.189852 | -0.361611  |
| H      | -1.189492 | 0.641458  | -0.779174 | N      | -0.019416 | -0.861807 | 0.954319  | H      | -0.869303 | 0.633325  | -0.744024  |
| C      | 0.692981  | -0.005521 | -0.018951 | H      | 0.416543  | -0.099643 | 1.471913  | C      | 0.956417  | -0.063127 | 0.101055   |
| H      | 0.840115  | -0.323983 | 1.020312  | C      | -1.453110 | -0.876945 | 0.847486  | H      | 1.019002  | -0.282272 | 1.178174   |

|        |           |           |           |        |           |           |           |        |           |           |           |
|--------|-----------|-----------|-----------|--------|-----------|-----------|-----------|--------|-----------|-----------|-----------|
| C      | 1.908147  | -1.056556 | -0.571679 | C      | 4.491000  | 1.259807  | 0.315477  | H      | -2.144450 | 3.882131  | 0.507330  |
| C      | 1.370506  | 1.383929  | -0.085942 | C      | 4.819509  | -0.691500 | -1.053950 | H      | -0.998204 | 4.270416  | -0.792545 |
| H      | 1.378039  | -2.014718 | -0.611420 | H      | 3.090734  | -1.398225 | -2.117289 |        |           |           |           |
| H      | 2.147311  | -0.752798 | -1.596324 | H      | 4.881137  | 2.013769  | 0.993462  | 90     |           |           |           |
| C      | 3.159370  | -1.287824 | 0.259667  | C      | 5.328831  | 0.264741  | -0.178865 | AsnIle |           |           |           |
| O      | 0.600670  | 2.295067  | -0.283648 | H      | 5.467822  | -1.468715 | -1.448538 | N      | 3.095453  | -2.676439 | -0.105948 |
| O      | 3.172863  | -1.173778 | 1.472766  | H      | 6.374972  | 0.236641  | 0.111829  | C      | 2.527424  | -1.370369 | 0.178856  |
| N      | 4.252633  | -1.676739 | -0.447538 | O      | 1.262989  | -1.074458 | 1.550529  | H      | 2.511219  | -1.207191 | 1.261745  |
| H      | 5.077947  | -1.937401 | 0.066378  | C      | 1.433446  | -0.806856 | 2.940112  | C      | 3.425934  | -0.284423 | -0.423821 |
| H      | 4.227676  | -1.821850 | -1.441179 | H      | 2.187514  | -1.511887 | 3.287859  | C      | 1.091577  | -1.253167 | -0.364146 |
| O      | 2.694411  | 1.534940  | 0.004429  | H      | 1.772668  | 0.220795  | 3.093557  | H      | 4.460891  | -0.630369 | -0.314262 |
| C      | 3.157859  | 2.879884  | -0.103996 | H      | 0.492668  | -0.954723 | 3.475487  | H      | 3.245726  | -0.178025 | -1.501499 |
| H      | 4.241283  | 2.827021  | -0.004721 |        |           |           |           | C      | 3.288449  | 1.063946  | 0.258123  |
| H      | 2.878271  | 3.306780  | -1.070244 | 88     |           |           |           | O      | 2.553969  | 1.257974  | 1.218921  |
| H      | 2.730358  | 3.497262  | 0.689567  | AsnGly |           |           |           | N      | 4.058706  | 2.050908  | -0.259227 |
| 86     |           |           |           | N      | -1.622391 | 2.638018  | 0.245928  | H      | 4.031030  | 2.955027  | 0.182895  |
| AsnCys |           |           |           | C      | -1.568487 | 1.193628  | 0.390364  | H      | 4.703456  | 1.890694  | -1.013285 |
| N      | 3.277005  | -2.401825 | 0.107307  | H      | -1.669652 | 0.929752  | 1.448316  | O      | 0.688924  | -2.027519 | -1.228980 |
| C      | 2.560707  | -1.153722 | 0.299014  | C      | -2.757749 | 0.578150  | -0.354165 | H      | 2.676740  | -3.353177 | 0.525445  |
| H      | 2.570747  | -0.885465 | 1.360997  | C      | -0.241329 | 0.630019  | -0.143137 | H      | 2.749913  | -2.948231 | -1.026222 |
| C      | 3.285469  | -0.031066 | -0.452933 | H      | -3.628852 | 1.209266  | -1.140845 | N      | 0.331720  | -0.264001 | 0.149698  |
| C      | 1.098995  | -1.268416 | -0.169487 | H      | -2.597111 | 0.629802  | -1.439233 | H      | 0.748231  | 0.410262  | 0.788855  |
| H      | 4.359624  | -0.235590 | -0.369866 | C      | -3.082968 | -0.847175 | 0.050132  | C      | -1.009966 | -0.042583 | -0.337911 |
| H      | 3.046040  | -0.055586 | -1.524015 | O      | -2.479808 | -1.461723 | 0.924630  | H      | -1.025479 | -0.238159 | -1.416197 |
| C      | 3.006810  | 1.351967  | 0.105515  | N      | -4.133346 | -1.399494 | -0.601212 | C      | -2.025572 | -1.014098 | 0.325443  |
| O      | 2.283690  | 1.550684  | 1.074316  | H      | -4.376406 | -2.353284 | -0.389033 | C      | -1.354479 | 1.411716  | -0.093899 |
| N      | 3.633705  | 2.367433  | -0.534300 | H      | -4.603943 | -0.929658 | -1.354947 | H      | -1.558939 | -1.998141 | 0.183610  |
| H      | 3.509419  | 3.301012  | -0.178214 | O      | 0.400010  | 1.230330  | -0.997153 | C      | -2.161336 | -0.746931 | 1.821228  |
| H      | 4.270378  | 2.211955  | -1.296245 | H      | -1.016290 | 3.052604  | 0.948093  | C      | -3.370588 | -1.038882 | -0.406249 |
| O      | 0.751608  | -2.177492 | -0.918483 | H      | -1.167868 | 2.856066  | -0.640806 | O      | -0.820224 | 2.115370  | 0.731613  |
| H      | 2.980564  | -3.057844 | 0.823835  | N      | 0.159339  | -0.548217 | 0.384638  | H      | -2.686679 | 0.195462  | 2.015829  |
| H      | 2.930782  | -2.806947 | -0.761920 | H      | -0.545719 | -1.087950 | 0.877242  | H      | -2.719785 | -1.546532 | 2.315358  |
| N      | 0.246795  | -0.320866 | 0.276153  | C      | 1.340603  | -1.177027 | -0.129559 | H      | -1.179454 | -0.685206 | 2.299592  |
| H      | 0.597258  | 0.453224  | 0.838876  | C      | 2.595195  | -0.398655 | 0.227822  | H      | -3.890538 | -0.084022 | -0.263026 |
| C      | -1.126994 | -0.305272 | -0.162355 | H      | 1.436974  | -2.172864 | 0.314507  | H      | -3.181542 | -1.121007 | -1.484342 |
| H      | -1.179531 | -0.550295 | -1.228878 | O      | 1.309951  | -1.295927 | -1.218519 | C      | -4.275738 | -2.186579 | 0.027193  |
| C      | -1.931340 | -1.365389 | 0.610819  | C      | 2.699900  | 0.387713  | 1.107808  | H      | -4.573780 | -2.099780 | 1.076658  |
| C      | -1.678016 | 1.088897  | 0.067415  | O      | 3.601941  | -0.768239 | -0.573759 | H      | -5.192053 | -2.207886 | -0.570728 |
| H      | -1.424421 | -2.315289 | 0.433193  | C      | 4.844663  | -0.124033 | -0.302487 | H      | -3.775821 | -3.153461 | -0.098036 |
| H      | -1.903070 | -1.128868 | 1.678247  | H      | 5.166924  | -0.319786 | 0.723394  | O      | -2.346010 | 1.828053  | -0.893098 |
| S      | -3.661295 | -1.503958 | 0.029003  | H      | 5.557983  | -0.540253 | -1.013511 | C      | -2.760169 | 3.177665  | -0.680534 |
| O      | -1.220093 | 1.883973  | 0.853439  | H      | 4.752878  | 0.955995  | -0.440350 | H      | -3.562481 | 3.357189  | -1.395294 |
| H      | -3.845003 | -2.752076 | 0.493308  |        |           |           |           | H      | -3.119019 | 3.314984  | 0.342418  |
| O      | -2.753827 | 1.310354  | -0.690706 | 89     |           |           |           | H      | -1.929288 | 3.865497  | -0.854533 |
| C      | -3.412044 | 2.557336  | -0.462258 | AsnGln |           |           |           |        |           |           |           |
| H      | -4.261215 | 2.570780  | -1.143758 | N      | 2.965304  | -3.046026 | -0.051008 | 91     |           |           |           |
| H      | -3.750609 | 2.625750  | 0.574049  | C      | 2.634462  | -1.660171 | 0.231306  | AsnHis |           |           |           |
| H      | -2.735336 | 3.389199  | -0.670699 | H      | 2.634747  | -1.496415 | 1.314221  | N      | -3.804408 | -2.438501 | 0.740109  |
| 87     |           |           |           | C      | 3.716646  | -0.748238 | -0.358741 | C      | -3.067513 | -1.397039 | 0.048204  |
| AsnPhe |           |           |           | C      | 1.248001  | -1.291636 | -0.326268 | H      | -3.053936 | -1.615907 | -1.025419 |
| N      | -4.438613 | -1.832746 | -0.468802 | H      | 4.673015  | -1.271783 | -0.240305 | C      | -3.792606 | -0.054257 | 0.226083  |
| C      | -3.473353 | -0.772481 | -0.693618 | H      | 3.569921  | -0.608805 | -1.437718 | C      | -1.611808 | -1.309407 | 0.548293  |
| H      | -3.573235 | -0.392609 | -1.716001 | C      | 3.811314  | 0.601588  | 0.327846  | H      | -4.862996 | -0.279778 | 0.295089  |
| C      | -3.769067 | 0.390737  | 0.262968  | O      | 3.108639  | 0.920857  | 1.278773  | H      | -3.512954 | 0.422406  | 1.174983  |
| C      | -2.034118 | -1.246693 | -0.453040 | N      | 4.751287  | 1.438201  | -0.174177 | C      | -3.561606 | 0.926306  | -0.908115 |
| H      | -4.858509 | 0.510382  | 0.296892  | H      | 4.880580  | 2.329316  | 0.276348  | O      | -2.731450 | 0.750499  | -1.794767 |
| H      | -3.444228 | 0.136126  | 1.279709  | H      | 5.376107  | 1.164746  | -0.912304 | N      | -4.350038 | 2.024635  | -0.888041 |
| C      | -3.153687 | 1.714750  | -0.149593 | O      | 0.717530  | -1.987263 | -1.189945 | H      | -4.231305 | 2.708790  | -1.617297 |
| O      | -2.588941 | 1.893055  | -1.225670 | H      | 2.441106  | -3.637849 | 0.586794  | H      | -5.062872 | 2.163658  | -0.193377 |
| N      | -3.330521 | 2.726334  | 0.730896  | H      | 2.571089  | -3.256174 | -0.967779 | O      | -1.272623 | -1.873771 | 1.580863  |
| H      | -2.864136 | 3.597376  | 0.535374  | N      | 0.674411  | -0.177404 | 0.169907  | H      | -3.511125 | -3.338589 | 0.372097  |
| H      | -3.645000 | 2.551792  | 1.669929  | H      | 1.189835  | 0.413676  | 0.819524  | H      | -3.468532 | -2.444911 | 1.702823  |
| O      | -1.797845 | -2.208340 | 0.268594  | C      | -0.605143 | 0.264879  | -0.330679 | N      | -0.775632 | -0.574026 | -0.222223 |
| H      | -4.407384 | -2.471937 | -1.257657 | H      | -0.634201 | 0.091607  | -1.413688 | H      | -1.178970 | -0.071959 | -1.013327 |
| H      | -4.089688 | -2.380466 | 0.317520  | C      | -1.761408 | -0.523555 | 0.319276  | C      | 0.604525  | -0.352345 | 0.144821  |
| N      | -1.062681 | -0.502759 | -1.036037 | C      | -0.715852 | 1.752417  | -0.065554 | H      | 0.758304  | -0.859086 | 1.100232  |
| H      | -1.365236 | 0.399793  | -1.399326 | H      | -1.440790 | -1.569283 | 0.332463  | C      | 1.551745  | -0.898791 | -0.926943 |
| C      | 0.293384  | -0.623612 | -0.559643 | H      | -1.895072 | -0.214821 | 1.360663  | C      | 0.836854  | 1.144048  | 0.310010  |
| H      | 0.651329  | -1.646482 | -0.708907 | C      | -3.089784 | -0.421866 | -0.416291 | H      | 1.304246  | -1.956327 | -1.083972 |
| C      | 1.176823  | 0.371189  | -1.332290 | O      | -0.023351 | 2.367258  | 0.709778  | H      | 1.334806  | -0.369838 | -1.863762 |
| C      | 0.349942  | -0.322340 | 0.936678  | H      | -3.371980 | 0.628121  | -0.558107 | C      | 2.988861  | -0.722974 | -0.565301 |
| H      | 1.066776  | 0.140090  | -2.397974 | H      | -3.005611 | -0.859290 | -1.418884 | O      | 0.771865  | 1.936391  | -0.601023 |
| H      | 0.766385  | 1.375956  | -1.175438 | C      | -4.208460 | -1.083505 | 0.371429  | N      | 3.989695  | -0.683364 | -1.507746 |
| C      | 2.629544  | 0.341557  | -0.938544 | O      | -4.231367 | -1.107162 | 1.590192  | C      | 3.647949  | -0.588982 | 0.633495  |
| O      | -0.317960 | 0.525064  | 1.486184  | N      | -5.211625 | -1.608666 | -0.382640 | H      | 3.860688  | -0.734358 | -2.505116 |
| C      | 3.151827  | 1.296362  | -0.063064 | H      | -5.973151 | -2.061325 | 0.095616  | C      | 5.171494  | -0.531270 | -0.851213 |
| C      | 3.481206  | -0.651211 | -1.429802 | H      | -5.156239 | -1.670923 | -1.383661 | N      | 5.001589  | -0.469634 | 0.445897  |
| H      | 2.500468  | 2.077266  | 0.323059  | O      | -1.699762 | 2.312118  | -0.785753 | H      | 3.214840  | -0.563485 | 1.624093  |
|        |           |           |           | C      | -1.899481 | 3.705878  | -0.542606 | H      | 6.118054  | -0.469842 | -1.371188 |
|        |           |           |           | H      | -2.727615 | 4.002697  | -1.185209 | O      | 1.096201  | 1.475427  | 1.578214  |

|        |           |           |           |        |           |           |           |        |           |           |           |
|--------|-----------|-----------|-----------|--------|-----------|-----------|-----------|--------|-----------|-----------|-----------|
| C      | 1.349664  | 2.863432  | 1.796911  | H      | 5.621094  | 0.442497  | -0.217895 | H      | 2.887543  | -0.071966 | 2.237140  |
| H      | 1.526775  | 2.967408  | 2.866660  | H      | 5.543742  | -0.852949 | 0.974456  | O      | 1.385009  | 1.179143  | -1.488040 |
| H      | 2.227729  | 3.182539  | 1.230426  | N      | 6.454897  | -1.468235 | -0.785537 | O      | 2.100942  | 2.187575  | 0.392480  |
| H      | 0.491516  | 3.464811  | 1.487316  | H      | 6.466498  | -1.233797 | -1.773763 | C      | 2.344892  | 3.371807  | -0.369447 |
| 92     |           |           |           | H      | 7.384070  | -1.260819 | -0.434821 | H      | 1.419623  | 3.728851  | -0.827674 |
| AsnLeu |           |           |           | O      | 1.218119  | 2.230634  | 1.146660  | H      | 2.728683  | 4.105149  | 0.338454  |
| N      | -3.684568 | -1.278222 | -1.649001 | C      | 1.358928  | 3.643853  | 1.003943  | H      | 3.076580  | 3.177582  | -1.157083 |
| C      | -2.774709 | -0.272226 | -1.131629 | H      | 1.993522  | 3.963644  | 1.829730  | 96     |           |           |           |
| H      | -2.833807 | 0.630984  | -1.748399 | H      | 1.821738  | 3.891439  | 0.045418  | AsnSer |           |           |           |
| C      | -3.200216 | 0.111091  | 0.292513  | H      | 0.383630  | 4.133533  | 1.057518  | N      | -3.338326 | -2.012206 | 0.498491  |
| C      | -1.326285 | -0.778067 | -1.091150 | 94     |           |           |           | C      | -2.432460 | -1.007817 | -0.028855 |
| H      | -4.296124 | 0.142468  | 0.304017  | AsnMet |           |           |           | H      | -2.510734 | -0.985710 | -1.121473 |
| H      | -2.894223 | -0.667675 | 1.002474  | N      | -3.127276 | -3.025241 | 0.184738  | C      | -2.855163 | 0.377771  | 0.478446  |
| C      | -2.673527 | 1.453060  | 0.764125  | C      | -2.765118 | -1.663429 | -0.165763 | C      | -0.970768 | -1.312376 | 0.353424  |
| O      | -2.032876 | 2.220157  | 0.050492  | H      | -2.768567 | -1.553412 | -1.255579 | H      | -3.948081 | 0.363857  | 0.564651  |
| N      | -3.014573 | 1.787284  | 2.030147  | C      | -3.822068 | -0.697778 | 0.384176  | H      | -2.465752 | 0.565259  | 1.487743  |
| H      | -2.614188 | 2.628440  | 2.412757  | C      | -1.365214 | -1.302053 | 0.363040  | C      | -2.448019 | 1.515618  | -0.438923 |
| H      | -3.409218 | 1.111968  | 2.662002  | H      | -4.789284 | -1.208973 | 0.308439  | O      | -1.767915 | 1.357152  | -1.446838 |
| O      | -1.077622 | -1.978146 | -1.065658 | H      | -3.658219 | -0.498791 | 1.451324  | N      | -2.904808 | 2.736997  | -0.077826 |
| H      | -3.565239 | -1.333862 | -2.656260 | C      | -3.900878 | 0.613359  | -0.375382 | H      | -2.667393 | 3.523896  | -0.659409 |
| H      | -3.347503 | -2.176730 | -1.303659 | O      | -3.182634 | 0.879588  | -1.331492 | H      | -3.496245 | 2.875928  | 0.722694  |
| N      | -0.368076 | 0.177647  | -1.031956 | N      | -4.843700 | 1.479001  | 0.067467  | O      | -0.714273 | -2.130872 | 1.228766  |
| H      | -0.698477 | 1.117084  | -0.816427 | H      | -4.959576 | 2.347419  | -0.428726 | H      | -3.248417 | -2.852539 | -0.064976 |
| C      | 0.963126  | -0.192026 | -0.618505 | H      | -5.480393 | 1.247564  | 0.809842  | H      | -2.970883 | -2.286553 | 1.409281  |
| H      | 1.338560  | -0.969424 | -1.289676 | O      | -0.833911 | -1.979639 | 1.238886  | N      | -0.028800 | -0.615919 | -0.323425 |
| C      | 1.862627  | 1.049524  | -0.666388 | H      | -2.616206 | -3.659968 | -0.421667 | H      | -0.332446 | 0.099089  | -0.983261 |
| C      | 0.913212  | -0.786416 | 0.787686  | H      | -2.738844 | -3.200325 | 1.111184  | C      | 1.376380  | -0.760865 | -0.028471 |
| H      | 1.782965  | 1.461210  | -1.681388 | N      | -0.781670 | -0.210705 | -0.174562 | H      | 1.473847  | -1.287540 | 0.922909  |
| H      | 1.434683  | 1.801488  | 0.010703  | H      | -1.295265 | 0.361132  | -0.843014 | C      | 2.071373  | -1.560667 | -1.129530 |
| C      | 3.341697  | 0.844226  | -0.325957 | C      | 0.512893  | 0.226052  | 0.289256  | C      | 2.016227  | 0.613742  | 0.058396  |
| O      | 0.108691  | -0.484846 | 1.638543  | H      | 0.582400  | 0.030591  | 1.365427  | H      | 1.602569  | -2.554754 | -1.173663 |
| H      | 3.411212  | 0.455304  | 0.699076  | C      | 1.641325  | -0.555031 | -0.418120 | H      | 1.925207  | -1.049004 | -2.887308 |
| C      | 4.018081  | -0.160807 | -1.255580 | C      | 0.619450  | 1.717193  | 0.043039  | O      | 3.442020  | -1.624088 | -0.810941 |
| C      | 4.062579  | 2.190314  | -0.366699 | H      | 1.376140  | -1.612438 | -0.319350 | O      | 1.871767  | 1.470397  | -0.783212 |
| H      | 3.918898  | 0.148882  | -2.303193 | H      | 1.628091  | -0.309109 | -1.486301 | H      | 3.906015  | -2.015286 | -1.556014 |
| H      | 5.087576  | -0.234197 | -1.032801 | C      | 3.028209  | -0.329985 | 0.167406  | O      | 2.754986  | 0.758544  | 1.160240  |
| H      | 3.591577  | -1.162249 | -1.152291 | O      | -0.024092 | 2.325302  | -0.778763 | C      | 3.434304  | 0.808607  | 1.264722  |
| H      | 3.603974  | 2.913827  | 0.315670  | H      | 3.338707  | 0.714363  | 0.067589  | H      | 3.983148  | 1.970436  | 2.205003  |
| H      | 5.114706  | 2.081711  | -0.084649 | H      | 3.030163  | -0.581059 | 1.234722  | H      | 4.120881  | 2.141480  | 0.425114  |
| H      | 4.032356  | 2.618805  | -1.375726 | S      | 4.226392  | -1.389705 | -0.697119 | H      | 2.720585  | 2.836195  | 1.268668  |
| O      | 1.902246  | -1.668895 | 0.979568  | C      | 5.732230  | -0.901573 | 0.174613  | 97     |           |           |           |
| C      | 1.937689  | -2.263183 | 2.275846  | H      | 5.670191  | -1.137251 | 1.240781  | AsnTyr |           |           |           |
| H      | 2.786262  | -2.946436 | 2.266918  | H      | 6.555771  | -1.471818 | -0.260608 | N      | -4.796205 | -1.781067 | -0.461221 |
| H      | 2.067084  | -1.500477 | 3.047920  | H      | 5.940037  | 0.164533  | 0.045903  | C      | -3.818474 | -0.731125 | -0.681076 |
| H      | 1.010281  | -2.807200 | 2.469475  | O      | 1.538861  | 2.283643  | 0.837174  | H      | -3.921716 | -0.337182 | -1.697768 |
| 93     |           |           |           | C      | 1.732817  | 3.682975  | 0.624828  | C      | -4.090477 | 0.423735  | 0.292277  |
| AsnLys |           |           |           | H      | 2.504666  | 3.985484  | 1.331575  | C      | -2.383865 | -1.227737 | -0.458519 |
| N      | -3.360741 | -2.972859 | 0.520610  | H      | 2.053068  | 3.876585  | -0.401706 | H      | -5.177797 | 0.558668  | 0.335939  |
| C      | -2.888466 | -1.716051 | -0.032428 | H      | 0.805694  | 4.229842  | 0.811575  | H      | -3.762138 | 0.151204  | 1.303272  |
| H      | -2.790019 | -1.809901 | -1.119524 | 95     |           |           |           | C      | -3.459161 | 1.743960  | -0.108152 |
| C      | -3.929611 | -0.619186 | 0.226335  | AsnPro |           |           |           | O      | -2.903247 | 1.929112  | -1.187519 |
| C      | -1.518026 | -1.324354 | 0.552117  | N      | -2.097245 | -0.118423 | -1.849592 | N      | -3.611512 | 2.745509  | 0.788531  |
| H      | -4.914879 | -1.097529 | 0.173162  | C      | -1.329316 | -0.234764 | -0.614255 | H      | -3.133618 | 3.611930  | 0.600441  |
| H      | -3.834677 | -0.214058 | 1.242305  | H      | -0.879829 | 0.739748  | -0.410586 | H      | -3.917624 | 2.561883  | 1.728600  |
| C      | -3.881822 | 0.515161  | -0.780592 | C      | -2.238085 | -0.620903 | 0.564661  | O      | -2.154921 | -2.199490 | 0.252006  |
| O      | -3.069725 | 0.566257  | -1.697059 | C      | -0.266554 | -1.329580 | -0.754097 | H      | -4.779814 | -2.410786 | -1.258114 |
| N      | -4.822954 | 1.473695  | -0.612907 | H      | -2.773382 | -1.541699 | 0.299225  | H      | -4.448025 | -2.343066 | 0.315333  |
| H      | -4.838789 | 2.241725  | -1.263713 | H      | -1.641898 | -0.843939 | 1.453669  | N      | -1.407819 | -0.492237 | -1.043723 |
| H      | -5.517248 | 1.426982  | 0.112114  | C      | -3.250321 | 0.438629  | 0.992425  | H      | -1.700439 | 0.417498  | -1.396632 |
| O      | -1.084513 | -1.885694 | 1.554080  | O      | -3.465354 | 0.669997  | 2.172671  | C      | -0.047254 | -0.638445 | -0.587013 |
| H      | -2.843663 | -3.729697 | 0.082939  | N      | -3.884842 | 1.053911  | -0.029609 | H      | 0.295299  | -1.663431 | -0.756688 |
| H      | -3.053806 | -2.995673 | 1.492838  | H      | -4.553598 | 1.772572  | 0.192262  | C      | 0.839921  | 0.357663  | -1.353997 |
| N      | -0.859447 | -0.335924 | -0.089269 | H      | -3.590992 | 0.845996  | -0.983364 | C      | 0.032770  | -0.361221 | 0.912434  |
| H      | -1.302614 | 0.125733  | -0.881495 | O      | -0.524393 | -2.331544 | -1.411957 | H      | 0.720943  | 0.140106  | -2.421744 |
| C      | 0.419281  | 0.137668  | 0.385971  | H      | -1.515270 | 0.338885  | -2.546388 | H      | 0.435387  | 1.362956  | -1.184497 |
| H      | 0.490206  | -0.105624 | 1.450407  | H      | -2.236615 | -1.070059 | -2.190001 | C      | 2.293809  | 0.318502  | -0.968351 |
| C      | 1.578604  | -0.548094 | -0.361444 | N      | 0.901540  | -1.206899 | -0.073502 | O      | -0.605128 | 0.496843  | 1.481117  |
| C      | 0.466877  | 1.641669  | 0.205561  | C      | 1.855338  | -2.309556 | -0.040195 | C      | 2.829375  | 1.256882  | -0.086195 |
| H      | 1.408749  | -1.626008 | -0.257278 | C      | 1.393258  | -0.034586 | 0.624951  | C      | 3.147338  | -0.670109 | -1.468920 |
| H      | 1.487485  | -0.312868 | -1.429858 | H      | 2.506736  | -2.286983 | -0.924624 | H      | 2.189299  | 2.038561  | 0.316382  |
| C      | 2.974902  | -0.199751 | 0.141804  | H      | 1.312663  | -3.256228 | -0.049038 | C      | 4.168576  | 1.215247  | 0.289530  |
| O      | -0.080267 | 2.241674  | -0.689819 | C      | 2.631925  | -2.028879 | 1.238960  | C      | 4.484315  | -0.726566 | -1.105176 |
| H      | 3.166105  | 0.873496  | 0.015740  | C      | 2.731717  | -0.504199 | 1.247291  | H      | 2.757381  | -1.411266 | -2.162861 |
| H      | 3.029369  | -0.389725 | 1.222434  | H      | 0.699200  | 0.286932  | 1.413038  | H      | 4.566012  | 1.961919  | 0.974520  |
| C      | 4.061727  | -0.997095 | -0.570901 | C      | 1.613603  | 1.153574  | -0.302657 | C      | 5.002163  | 0.220391  | -0.219682 |
| H      | 3.905803  | -2.072765 | -0.424803 | H      | 3.611044  | -2.513907 | 1.258306  | H      | 5.145218  | -1.491953 | -1.498638 |
| H      | 3.990890  | -0.820482 | -1.654501 | H      | 2.059963  | -2.380533 | 2.104343  | O      | 6.317666  | 0.124751  | 0.102301  |
| C      | 5.466206  | -0.646629 | -0.100796 | H      | 3.565008  | -0.181144 | 0.614190  | H      | 6.543472  | 0.836833  | 0.709164  |

|        |           |           |           |        |           |           |           |        |           |           |           |
|--------|-----------|-----------|-----------|--------|-----------|-----------|-----------|--------|-----------|-----------|-----------|
| O      | 0.929954  | -1.147541 | 1.506899  | C      | -5.639334 | 1.277438  | -0.121392 | C      | -4.395637 | -1.663935 | -0.608209 |
| C      | 1.118118  | -0.906683 | 2.898680  | H      | -4.739365 | 3.184994  | -0.568236 | H      | -4.908379 | -0.701050 | -0.677618 |
| H      | 1.492119  | 0.106907  | 3.065109  | H      | -6.299744 | -0.739631 | 0.271664  | H      | -4.440611 | -2.189720 | -1.561491 |
| H      | 0.176627  | -1.031190 | 3.438746  | H      | -6.612603 | 1.713599  | 0.083346  | H      | -4.867712 | -2.256258 | 0.179315  |
| H      | 1.850646  | -1.641396 | 3.230859  | O      | -0.574941 | -0.193786 | 1.971804  |        |           |           |           |
|        |           |           |           | C      | -0.530897 | -1.038954 | 3.117508  | 102    |           |           |           |
| 98     |           |           |           | H      | -0.674841 | -2.084173 | 2.831509  | CysGlu |           |           |           |
| AsnThr |           |           |           | H      | 0.430865  | -0.941419 | 3.626898  | N      | 3.562351  | -2.379825 | -1.303178 |
| N      | 3.452425  | -1.417343 | -1.243808 | H      | -1.341469 | -0.705164 | 3.764347  | C      | 3.011573  | -1.554930 | -0.248200 |
| C      | 2.484079  | -0.845522 | -0.326430 |        |           |           |           | H      | 2.798540  | -2.117570 | 0.681232  |
| H      | 2.596022  | -1.301866 | 0.662931  | 100    |           |           |           | C      | 4.028515  | -0.451977 | 0.083209  |
| C      | 2.756707  | 0.654738  | -0.160788 | AsnVal |           |           |           | C      | 1.645362  | -1.042816 | -0.738006 |
| C      | 1.044160  | -1.037726 | -0.820380 | N      | 3.310402  | -2.240214 | -0.090258 | H      | 5.026752  | -0.891610 | 0.039767  |
| H      | 3.844004  | 0.778097  | -0.090197 | C      | 2.508271  | -1.061632 | 0.187793  | H      | 3.974458  | 0.344688  | -0.663120 |
| H      | 2.429334  | 1.206174  | -1.050486 | H      | 2.466298  | -0.893643 | 1.269254  | S      | 3.748790  | 0.233764  | 1.760514  |
| C      | 2.132266  | 1.245638  | 1.089148  | C      | 3.182991  | 0.168790  | -0.429903 | H      | 4.392679  | 1.397726  | 1.574270  |
| O      | 1.734735  | 0.553807  | 2.020510  | C      | 1.073450  | -1.222470 | -0.347325 | O      | 1.036152  | -1.649799 | -1.613436 |
| N      | 2.118192  | 2.600051  | 1.147944  | H      | 4.265150  | 0.024845  | -0.325184 | H      | 4.065082  | -3.169043 | -0.916985 |
| H      | 1.596799  | 3.005800  | 1.909261  | H      | 2.980138  | 0.229776  | -1.507097 | H      | 2.784845  | -2.728308 | -1.859310 |
| H      | 2.198123  | 3.140848  | 0.303185  | C      | 2.797661  | 1.473102  | 0.242851  | N      | 1.150431  | 0.066444  | -0.152321 |
| O      | 0.809277  | -1.255443 | -2.003155 | O      | 2.042476  | 1.533564  | 1.205411  | H      | 1.655029  | 0.546240  | 0.588625  |
| H      | 3.434649  | -2.428045 | -1.143701 | N      | 3.368007  | 2.582861  | -0.284278 | C      | -0.132392 | 0.593924  | -0.551180 |
| H      | 3.096122  | -1.250007 | -2.184295 | H      | 3.170580  | 3.469347  | 0.150312  | H      | -0.235704 | 0.473348  | -1.635536 |
| N      | 0.072698  | -0.920643 | 0.121085  | O      | 4.027631  | 2.541262  | -1.041322 | C      | -1.285798 | -0.165725 | 0.134854  |
| H      | 0.342013  | -0.554389 | 1.031458  | H      | 0.819206  | -2.070296 | -1.199566 | C      | -0.135928 | 2.071527  | -0.209211 |
| C      | -1.289635 | -0.737643 | -0.289032 | H      | 3.036808  | -2.974727 | 0.555913  | H      | -1.080205 | -1.228635 | -0.013614 |
| H      | -1.430234 | -1.285669 | -1.227434 | H      | 3.009336  | -2.585601 | -1.001452 | H      | -1.246001 | 0.029376  | 1.213310  |
| C      | -2.268245 | -1.268542 | 0.759399  | N      | 0.144591  | -0.385108 | 0.158132  | C      | -2.670577 | 0.155128  | -0.422413 |
| C      | -1.552830 | 0.736509  | -0.597985 | H      | 0.432504  | 0.366334  | 0.782296  | O      | 0.605023  | 2.586080  | 0.596405  |
| H      | -3.283689 | -1.081490 | 0.380135  | C      | -1.214529 | -0.419497 | -0.330167 | H      | -2.932997 | 1.207412  | -0.306927 |
| C      | -2.085395 | -2.754060 | 1.018346  | H      | -1.194102 | -0.626534 | -1.406496 | H      | -2.686758 | -0.065735 | -1.498060 |
| O      | -2.023140 | -0.493062 | 1.920390  | C      | -2.032808 | -1.554356 | 0.345212  | C      | -3.779909 | -0.643758 | 0.215996  |
| O      | -0.731508 | 1.619313  | -0.539022 | C      | -1.821040 | 0.949040  | -0.101662 | O      | -4.839910 | -0.191747 | 0.578982  |
| H      | -1.066734 | -2.960508 | 1.355841  | H      | -1.384456 | -2.431512 | 0.229804  | O      | -1.074527 | 2.735376  | -0.890772 |
| H      | -2.786861 | -3.096613 | 1.787649  | C      | -2.246779 | -1.295692 | 1.832671  | C      | -1.174277 | 4.128445  | -0.583743 |
| H      | -2.278321 | -3.337237 | 0.112771  | C      | -3.342737 | -1.849036 | -0.377602 | H      | -1.980362 | 4.510723  | -1.208342 |
| H      | -2.530364 | -0.866310 | 2.647478  | O      | -1.402373 | 1.763286  | 0.688028  | H      | -1.405159 | 4.272963  | 0.474104  |
| O      | -2.822727 | 0.924929  | -0.082381 | H      | -2.928178 | -0.453365 | 2.000491  | H      | -0.235144 | 4.636809  | -0.813274 |
| C      | -3.160036 | 2.271519  | -1.309348 | H      | -2.685271 | -2.174734 | 2.315064  | O      | -3.461234 | -1.945940 | 0.315848  |
| H      | -4.208872 | 2.253019  | -1.604075 | H      | -1.303579 | -1.068254 | 2.338060  | C      | -4.476221 | -2.770166 | 0.884249  |
| H      | -3.016898 | 2.923583  | -0.444255 | H      | -3.175247 | -2.045602 | -1.441532 | H      | -4.062548 | -3.777948 | 0.907707  |
| H      | -2.537829 | 2.634346  | -2.131116 | H      | -3.817299 | -2.735308 | 0.055601  | H      | -4.726684 | -2.434186 | 1.893499  |
|        |           |           |           | H      | -4.048336 | -1.017030 | -0.298222 | H      | -5.382056 | -2.742486 | 0.273391  |
| 99     |           |           |           | O      | -2.901527 | 1.148219  | -0.868900 |        |           |           |           |
| AsnTrp |           |           |           | C      | -3.554826 | 2.401753  | -0.668602 | 103    |           |           |           |
| N      | 4.681975  | 2.371210  | 0.264860  | H      | -4.403734 | 2.405582  | -1.351389 | CysAla |           |           |           |
| C      | 3.866325  | 1.346318  | -0.360495 | H      | -3.892897 | 2.500217  | 0.365799  | N      | 3.457065  | -1.292534 | -0.739199 |
| H      | 3.899410  | 1.459769  | -1.449279 | H      | -2.876523 | 3.227982  | -0.894459 | C      | 2.540244  | -0.451232 | 0.001678  |
| C      | 4.444118  | -0.034185 | -0.022357 |        |           |           |           | H      | 2.785836  | -0.380884 | 1.078787  |
| C      | 2.412175  | 1.394616  | 0.125532  | 101    |           |           |           | C      | 2.593527  | 0.963939  | -0.594860 |
| H      | 5.533466  | 0.037141  | -0.125706 | CysAsp |           |           |           | C      | 1.155333  | -1.121275 | -0.060420 |
| H      | 4.238804  | -0.280975 | 1.026746  | N      | 3.711401  | -2.219107 | -0.651924 | H      | 3.631897  | 1.180122  | -0.853041 |
| C      | 3.952804  | -1.153404 | -0.921027 | C      | 3.130647  | -1.094906 | 0.051829  | H      | 1.998641  | 1.008095  | -1.510721 |
| O      | 3.342619  | -0.957919 | -1.968632 | H      | 3.279355  | -1.140578 | 1.148011  | S      | 2.000788  | 2.219947  | 0.602452  |
| N      | 4.302727  | -2.400400 | -0.527894 | C      | 3.789059  | 0.192757  | -0.467272 | H      | 1.708162  | 3.178188  | -0.292039 |
| H      | 3.913400  | -3.170382 | -1.047846 | C      | 1.607781  | -1.164318 | -0.156992 | O      | 1.061590  | -2.324003 | -0.287198 |
| H      | 4.623251  | -2.575436 | 0.409200  | H      | 4.849397  | -0.012978 | -0.625350 | H      | 4.365224  | -1.314666 | -0.292605 |
| O      | 2.125626  | 1.883096  | 1.212308  | H      | 3.351041  | 0.477129  | -1.427414 | H      | 3.072509  | -2.234684 | -0.744055 |
| H      | 4.462818  | 3.265932  | -0.163252 | S      | 3.617270  | 1.564987  | 0.736383  | N      | 0.079254  | -0.343779 | 0.169326  |
| H      | 4.349732  | 2.458560  | 1.225110  | H      | 3.791512  | 2.573352  | -0.133570 | H      | 0.174924  | 0.652739  | 0.345895  |
| N      | 1.497564  | 0.816411  | -0.689784 | O      | 1.070496  | -2.228850 | -0.447392 | C      | -1.251200 | -0.900059 | 0.124617  |
| H      | 1.879495  | 0.240073  | -1.437236 | H      | 4.500084  | -2.594545 | -0.140398 | H      | -1.301425 | -1.608999 | -0.710641 |
| C      | 0.199387  | 0.471905  | -0.162727 | H      | 2.997449  | -2.939937 | -0.727105 | C      | -1.623189 | -1.648421 | 1.408097  |
| H      | -0.322452 | 1.375270  | 0.165227  | N      | 0.902372  | -0.029172 | 0.022673  | C      | -2.218246 | 0.233085  | -0.153908 |
| C      | -0.601872 | -0.248058 | -1.262516 | H      | 1.357988  | 0.846210  | 0.269896  | H      | -1.583943 | -0.977303 | 2.271147  |
| C      | 0.353651  | -0.443497 | 1.048803  | C      | -0.526448 | -0.016024 | -0.159960 | H      | -2.628129 | -2.069431 | 1.329948  |
| H      | -0.633116 | 0.422556  | -2.130489 | H      | -0.784771 | -0.577411 | -1.065261 | H      | -0.907884 | -2.459882 | 1.555777  |
| H      | -0.029120 | -1.133161 | -1.565301 | C      | -1.259667 | -0.681925 | 1.022430  | O      | -1.922555 | 1.405780  | -0.171628 |
| C      | -1.983055 | -0.649813 | -0.864875 | C      | -0.951010 | 1.430010  | -0.337223 | O      | -3.455054 | -0.229442 | -0.360803 |
| O      | 1.188478  | -1.316155 | 1.142102  | H      | -0.815974 | -1.677840 | 1.127890  | C      | -4.441668 | 0.773762  | -0.604184 |
| C      | -2.420259 | -1.923282 | -0.615088 | H      | -1.100377 | -0.121261 | 1.945822  | H      | -5.379598 | 0.238066  | -0.744955 |
| C      | -3.316575 | 1.596162  | -0.760835 | C      | -2.745295 | -0.850997 | 0.826264  | H      | -4.512886 | 1.456773  | 0.245589  |
| C      | -3.115291 | 0.212255  | -0.657921 | O      | -0.214190 | 2.381123  | -0.217348 | H      | -4.190822 | 1.349431  | -1.498286 |
| H      | -1.874571 | -2.855820 | -0.666223 | O      | -3.594567 | -0.509638 | 1.613493  |        |           |           |           |
| N      | -3.749189 | -1.905801 | -0.264371 | O      | -2.251338 | 1.518094  | -0.620858 | 104    |           |           |           |
| C      | -4.206046 | -0.611504 | -0.284348 | C      | -2.762739 | 2.848194  | -0.731206 | CysArg |           |           |           |
| C      | -4.572249 | 2.114714  | -0.492564 | H      | -3.828065 | 2.738271  | -0.927841 | N      | 4.517953  | -2.187748 | -0.919784 |
| H      | -2.500122 | 2.253265  | -1.048073 | H      | -2.598983 | 3.398126  | 0.198027  | C      | 3.828368  | -1.302580 | -0.003908 |
| H      | -4.305533 | -2.716481 | -0.058232 | H      | -2.271704 | 3.378366  | -1.550402 | H      | 3.727381  | -1.722164 | 1.015633  |
| C      | -5.473563 | -0.094101 | -0.013116 | O      | -3.010792 | -1.472586 | -0.333877 | C      | 4.624568  | 0.007711  | 0.094979  |

|        |           |           |           |        |           |           |           |        |           |           |           |
|--------|-----------|-----------|-----------|--------|-----------|-----------|-----------|--------|-----------|-----------|-----------|
| C      | 2.388304  | -1.141428 | -0.524981 | S      | 2.836809  | 1.821735  | 0.987941  | H      | -1.352869 | -2.027707 | 0.502085  |
| H      | 5.687059  | -0.242673 | 0.083704  | H      | 2.841151  | 2.956004  | 0.268481  | H      | -1.742368 | -1.126786 | 1.971243  |
| H      | 4.414050  | 0.640733  | -0.770788 | O      | 1.026968  | -2.186585 | -0.718995 | O      | -1.677057 | 0.934183  | -0.378421 |
| S      | 4.237140  | 0.908396  | 1.644173  | H      | 4.468877  | -1.944349 | -0.412158 | O      | -3.372461 | -0.466256 | 0.080356  |
| H      | 4.640527  | 2.123300  | 1.237367  | H      | 3.052200  | -2.487047 | -1.059837 | C      | -4.235194 | 0.376075  | -0.687373 |
| O      | 1.899161  | -1.999017 | -1.254944 | N      | 0.458922  | -0.121070 | -0.008863 | H      | -3.890920 | 0.432899  | -1.722447 |
| H      | 5.155531  | -2.795083 | -0.420318 | H      | 0.744006  | 0.778751  | 0.371275  | H      | -5.220386 | -0.085455 | -0.636217 |
| H      | 3.813571  | -2.761026 | -1.378949 | C      | -0.950234 | -0.346386 | -0.127255 | H      | -4.260339 | 1.384067  | -0.266920 |
| N      | 1.703704  | -0.050726 | -0.129585 | H      | -1.099125 | -0.886885 | -1.158158 |        |           |           |           |
| H      | 2.111189  | 0.628628  | 0.507536  | C      | -1.523867 | -1.203619 | 0.924756  |        |           |           |           |
| C      | 0.339195  | 0.159100  | -0.556506 | C      | -1.619207 | 1.013543  | -0.300422 | 109    |           |           |           |
| H      | 0.243906  | -0.183356 | -1.592286 | H      | -0.928796 | -2.118232 | 0.940141  | CysGln |           |           |           |
| C      | -0.654522 | -0.634563 | 0.314833  | H      | -1.399534 | -0.672849 | 1.873130  | N      | 3.643932  | -2.180667 | -1.097668 |
| C      | 0.074460  | 1.649979  | -0.492071 | S      | -3.279018 | -1.652042 | 0.664771  | C      | 3.011104  | -1.302488 | -0.135434 |
| H      | -0.269205 | -1.660744 | 0.336033  | O      | -1.122170 | 2.041486  | 0.098545  | H      | 2.929516  | -1.747662 | 0.874795  |
| H      | -0.604313 | -0.248698 | 1.341152  | H      | -3.234950 | -2.756478 | 1.429874  | C      | 3.849142  | -0.019058 | -0.026741 |
| C      | -2.094141 | -0.638459 | -0.183951 | O      | -2.831030 | 0.922188  | -0.844689 | H      | 4.902595  | -0.300803 | -0.077209 |
| O      | 0.685101  | 2.418739  | 0.215561  | C      | -3.580431 | 2.138862  | -0.879284 | H      | 3.632570  | 0.642725  | -0.869184 |
| H      | -2.520184 | 0.368374  | -0.170907 | H      | -4.536117 | 1.881641  | -1.332917 | S      | 3.536234  | 0.851499  | 1.556097  |
| H      | -2.118543 | -0.989129 | -1.225232 | H      | -3.726286 | 2.525613  | 0.131721  | H      | 3.961287  | 2.064547  | 1.166149  |
| C      | -2.978927 | -1.537070 | 0.677312  | H      | -3.058339 | 2.889678  | -1.476650 | O      | 1.024260  | -1.893130 | -1.352903 |
| H      | -2.585423 | -2.560952 | 0.691032  |        |           |           |           | H      | 4.277387  | -2.821220 | -0.635960 |
| H      | -2.982413 | -1.167426 | 1.706686  | 107    |           |           |           | H      | 2.909008  | -2.718712 | -1.551267 |
| N      | -4.361805 | -1.601172 | 0.249270  | CysPhe |           |           |           | N      | 0.917908  | 0.007275  | -1.406673 |
| H      | -4.509346 | -2.026419 | -1.395398 | N      | 4.141179  | -2.191689 | -0.738967 | H      | 1.367775  | 0.660198  | 0.495676  |
| C      | -5.198885 | -0.532313 | 0.502452  | C      | 3.513563  | -1.153734 | 0.052109  | C      | -0.449304 | 0.264946  | -0.525391 |
| N      | -4.801562 | 0.464981  | 1.202184  | H      | 3.575464  | -1.337170 | 1.142472  | H      | -0.565807 | -0.010077 | -1.580267 |
| N      | -6.445863 | -0.698141 | -0.101974 | C      | 4.218497  | 0.177225  | -0.249497 | C      | -1.440317 | -0.567714 | 0.313637  |
| H      | -5.574507 | 1.096386  | 1.091865  | C      | 2.010793  | -1.176091 | -0.279206 | C      | -0.682593 | 1.755270  | -0.371552 |
| H      | -6.799876 | -1.644336 | -0.061776 | H      | 5.287263  | -0.022607 | -0.347296 | H      | -1.010988 | -1.571945 | 0.378472  |
| H      | -7.136385 | -0.025999 | 0.196419  | H      | 3.859643  | 0.585123  | -1.197848 | H      | -1.499387 | -0.177252 | 1.334397  |
| O      | -0.931636 | 2.010177  | -1.292808 | S      | 3.957429  | 1.390291  | 1.100364  | C      | -2.841115 | -0.663543 | -0.273673 |
| C      | -1.296588 | 3.389718  | -1.220994 | H      | 4.233505  | 2.495462  | 0.388557  | O      | 0.032946  | 2.498196  | 0.259203  |
| H      | -2.116573 | 3.514589  | -1.926867 | O      | 1.491172  | -2.198649 | -0.716159 | H      | -3.241811 | 0.336678  | -0.476387 |
| H      | -1.619057 | 3.647782  | -0.209675 | H      | 4.889542  | -2.634820 | -0.220852 | H      | -2.817485 | -1.190904 | -1.235265 |
| H      | -0.450605 | 4.023756  | -1.496245 | C      | 3.431482  | -2.890062 | -0.948275 | C      | -3.797185 | -1.340125 | 0.695191  |
|        |           |           |           | N      | 1.306022  | -0.049199 | -0.049661 | O      | -3.688344 | -1.236977 | 1.905146  |
| 105    |           |           |           | H      | 1.735584  | 0.762615  | 0.386903  | N      | -4.813561 | -2.031842 | 0.114010  |
| CysAsn |           |           |           | C      | -0.117389 | -0.015894 | -0.287334 | H      | -5.470274 | -2.500055 | 0.716645  |
| N      | 3.585477  | -2.047400 | -0.577758 | H      | -0.337423 | -0.585637 | -1.194063 | H      | -4.858125 | -2.192671 | -0.876573 |
| C      | 2.912712  | -0.960933 | 0.102743  | C      | -0.896398 | -0.642282 | 0.896112  | O      | -1.794059 | 2.153515  | -1.002631 |
| H      | 3.039673  | -0.989804 | 1.201940  | C      | -0.519332 | 1.431456  | -0.480221 | C      | -2.104896 | 3.541165  | -0.853831 |
| C      | 3.493497  | 0.366179  | -0.411355 | H      | -0.472228 | -1.642408 | 1.031363  | H      | -3.025959 | 3.698928  | -1.413451 |
| C      | 1.401733  | -1.133484 | -0.144126 | H      | -0.672159 | -0.058708 | 1.795677  | H      | -2.246439 | 3.791639  | 0.199929  |
| H      | 4.566907  | 0.229373  | -0.554397 | C      | -2.381649 | -0.732342 | 0.676548  | H      | -1.299147 | 4.157825  | -1.258318 |
| H      | 3.050920  | 0.620692  | -1.377798 | O      | 0.012137  | 2.359523  | 0.087568  |        |           |           |           |
| S      | 3.215863  | 1.727465  | 0.785490  | C      | -3.256678 | 0.171361  | 1.283291  | 110    |           |           |           |
| H      | 3.320685  | 2.743166  | -0.086988 | C      | -2.911854 | -1.719592 | -0.159258 | CysIle |           |           |           |
| O      | 0.949769  | -2.230533 | -0.458413 | H      | -2.857512 | 0.939177  | 1.942671  | N      | 3.628494  | -1.690477 | -1.137874 |
| H      | 4.368788  | -2.384255 | -0.032524 | C      | -4.628762 | 0.094076  | 1.060492  | C      | 2.877719  | -0.891431 | -0.191699 |
| H      | 2.914275  | -2.804025 | -0.689531 | C      | -4.281660 | -1.798529 | -0.385546 | H      | 2.959663  | -1.256126 | 0.850527  |
| N      | 0.617559  | -0.053091 | 0.037634  | H      | -2.240542 | -2.434150 | -0.630607 | C      | 3.417021  | 0.546153  | -0.238640 |
| H      | 1.020979  | 0.853747  | 0.258980  | H      | -5.295566 | 0.801156  | 1.546133  | C      | 1.388885  | -1.034665 | -0.557527 |
| C      | -0.800985 | -0.104015 | -0.225199 | C      | -5.144957 | -0.890852 | 0.223723  | H      | 4.501859  | 0.494693  | -0.349069 |
| H      | -0.992065 | -0.569566 | -1.203272 | H      | -4.677553 | -2.574254 | -1.034929 | H      | 3.010780  | 1.071501  | -1.106835 |
| C      | -1.573576 | -0.951251 | 0.791822  | H      | -6.215413 | -0.955273 | 0.051259  | S      | 3.014046  | 1.460159  | 1.298871  |
| C      | -1.290738 | 1.330974  | -0.291748 | O      | -1.547702 | 1.550101  | -1.318608 | H      | 3.166299  | 2.698827  | 0.801959  |
| H      | -0.971759 | -1.849866 | 0.968240  | C      | -2.061643 | 2.874090  | -1.466373 | O      | 1.001465  | -2.018355 | -1.181204 |
| H      | -1.692525 | -0.426046 | 1.745618  | H      | -2.872006 | 2.796357  | -1.289704 | H      | 4.421526  | -2.129641 | -0.687176 |
| C      | -2.905099 | -1.424931 | 0.230389  | H      | -2.437983 | 3.245616  | -0.510244 | H      | 3.007174  | -2.417626 | -1.485349 |
| O      | -0.564796 | 2.299645  | -0.303484 | H      | -1.283402 | 3.549991  | -1.828092 | N      | 0.551018  | -0.063675 | -0.142885 |
| O      | -3.085943 | -1.607275 | -0.960230 |        |           |           |           | H      | 0.891894  | 0.744516  | 0.370465  |
| N      | -3.864616 | -1.668738 | 1.161169  | 108    |           |           |           | C      | -0.859648 | -0.126518 | -0.447852 |
| H      | -4.725070 | -2.088269 | 0.849421  | CysGly |           |           |           | H      | -0.975791 | -0.543795 | -1.454429 |
| H      | -3.689742 | -1.588660 | 2.147226  | N      | 3.356734  | -1.335803 | -0.463147 | C      | -1.624315 | -1.052501 | 0.537506  |
| O      | -2.620877 | 1.396869  | -0.334371 | C      | 2.371232  | -0.475268 | 0.164783  | C      | -1.376816 | 1.298333  | -0.440493 |
| C      | -3.161263 | 2.714299  | -0.436233 | H      | 2.652683  | -0.308209 | 1.211201  | H      | -1.023097 | -1.971464 | 0.536090  |
| H      | -4.242179 | 2.586220  | -0.471475 | C      | 2.398198  | 0.884888  | -0.550718 | C      | -1.637441 | -0.477311 | 1.950564  |
| H      | -2.871213 | 3.316926  | 0.427895  | C      | 0.967335  | -1.088224 | 0.104657  | C      | -3.019554 | -1.422718 | 0.025602  |
| H      | -2.803333 | 3.204857  | -1.344276 | H      | 3.439678  | 1.212134  | -0.580565 | O      | -0.808317 | 2.228482  | 0.085469  |
|        |           |           |           | H      | 2.060658  | 0.773218  | -1.585443 | H      | -2.283853 | 0.406031  | 2.017764  |
| 106    |           |           |           | S      | 1.468595  | 2.231862  | 0.252064  | H      | -2.005738 | -1.212040 | 2.671324  |
| CysCys |           |           |           | H      | 0.234751  | 1.860940  | -0.152767 | H      | -0.632997 | -0.181118 | 2.267709  |
| N      | 3.618968  | -1.660925 | -0.883364 | O      | 0.663860  | -1.895719 | -0.761684 | H      | -3.669977 | -0.540432 | 0.045707  |
| C      | 2.844752  | -0.763902 | -0.051443 | H      | 3.547459  | -2.123194 | 0.149268  | H      | -2.938787 | -1.715418 | -1.029134 |
| H      | 3.002593  | -0.926001 | 1.032618  | H      | 2.913447  | -1.743462 | -1.285161 | C      | -3.669019 | -2.559992 | 0.806232  |
| C      | 3.254379  | 0.678959  | -0.383386 | N      | 0.096621  | -0.688031 | 1.074520  | H      | -3.857801 | -2.286906 | 1.849081  |
| C      | 1.359925  | -1.083269 | -0.298522 | H      | 0.350469  | 0.133215  | 1.607696  | H      | -4.630637 | -2.836373 | 0.363276  |
| H      | 4.334023  | 0.693139  | -0.544102 | C      | -1.287208 | -1.045560 | 0.978970  | H      | -3.034627 | -3.453259 | 0.805126  |
| H      | 2.768347  | 1.004053  | -1.306771 | C      | -2.100695 | -0.068959 | 0.148581  | O      | -2.550732 | 1.407226  | -1.070850 |



|        |           |           |           |        |           |           |           |        |           |           |           |
|--------|-----------|-----------|-----------|--------|-----------|-----------|-----------|--------|-----------|-----------|-----------|
| C      | -0.217318 | 0.013370  | 0.289298  | H      | -0.049745 | 1.007462  | 1.935249  | H      | -3.031618 | 4.032506  | -0.340568 |
| H      | 0.015903  | -0.552487 | 1.195002  | C      | -1.887563 | 0.356785  | 1.037553  | H      | -1.403722 | 4.079969  | -0.584269 |
| C      | 0.584462  | -0.583434 | -0.894044 | O      | 1.319967  | 2.683849  | -0.302058 | N      | -0.219278 | 0.610953  | -0.239000 |
| C      | 0.140731  | 1.471110  | 0.487084  | C      | -2.731990 | 1.337052  | 1.484007  | H      | -0.895840 | -0.142460 | -0.258742 |
| H      | 0.196019  | -1.597779 | -1.031932 | C      | -2.439959 | -1.822477 | -0.288793 | C      | 1.175985  | 0.254886  | -0.261968 |
| H      | 0.336544  | -0.007700 | -1.792648 | C      | -2.711244 | -0.609081 | 0.361344  | H      | 1.706089  | 0.927522  | -0.945911 |
| C      | 2.072035  | -0.616727 | -0.678682 | H      | -2.506804 | 2.235675  | 2.042443  | C      | 1.824036  | 0.407526  | 1.129447  |
| O      | -0.398527 | 2.382588  | -0.100231 | N      | -4.026552 | 1.042707  | 1.123897  | C      | 1.288924  | -1.165310 | -1.782605 |
| C      | 2.914664  | 0.319430  | -1.277423 | C      | -4.047423 | -0.146187 | 0.436581  | H      | 1.613046  | 1.434986  | 1.444955  |
| C      | 2.651069  | -1.584260 | 0.150339  | C      | -3.495942 | -2.529026 | -0.841107 | H      | 1.376236  | -0.283849 | 1.846309  |
| H      | 2.492972  | 1.078113  | -1.933095 | H      | -1.420544 | -2.196644 | -0.352555 | C      | 3.318571  | 0.208394  | 1.155208  |
| C      | 4.289247  | 0.298771  | -1.060463 | H      | -4.833502 | 1.591716  | 1.361596  | O      | 0.349806  | -1.889851 | -1.019812 |
| C      | 4.018391  | -1.617989 | 0.378521  | C      | -5.112572 | -0.856899 | -0.118740 | O      | 3.910341  | -0.525126 | 1.909968  |
| H      | 2.014703  | -2.329767 | 0.621984  | C      | -4.816125 | -2.050907 | -0.757649 | O      | 2.565606  | -1.523319 | -0.927804 |
| H      | 4.928948  | 1.034353  | -1.544684 | H      | -3.304701 | -3.470313 | -1.347886 | C      | 2.778053  | -2.872258 | -1.348863 |
| C      | 4.846263  | -0.671713 | -0.228648 | H      | -6.133948 | -0.492104 | -0.053675 | H      | 3.858549  | -3.002139 | -1.385593 |
| H      | 4.466249  | -2.371974 | 1.017625  | H      | -5.621148 | -2.629582 | -1.201340 | H      | 2.332336  | -3.569438 | -0.636064 |
| O      | 6.178399  | -0.749655 | 0.023355  | O      | -0.714371 | 2.270055  | -1.166416 | H      | 2.335951  | -3.038092 | -2.333941 |
| H      | 6.629911  | -0.053858 | -0.464831 | C      | -0.802348 | 3.647674  | -1.528302 | O      | 3.924317  | 0.987898  | 0.245391  |
| O      | 1.141200  | 1.621860  | 1.354099  | H      | -0.732828 | 4.284214  | -0.642799 | C      | 5.341504  | 0.854917  | 0.190203  |
| C      | 1.611541  | 2.960564  | 1.511073  | H      | 0.002804  | 3.915838  | -2.216583 | H      | 5.619640  | -0.166850 | -0.081058 |
| H      | 2.003534  | 3.340278  | 0.564408  | H      | -1.772320 | 3.764400  | -2.009819 | H      | 5.677117  | 1.556892  | -0.572551 |
| H      | 0.804146  | 3.614821  | 1.847930  |        |           |           |           | H      | 5.790517  | 1.095067  | 1.156990  |
| H      | 2.402895  | 2.909227  | 2.257541  |        |           |           |           |        |           |           |           |
|        |           |           |           | 120    |           |           |           | 122    |           |           |           |
| 118    |           |           |           | CysVal |           |           |           | PheGlu |           |           |           |
| CysThr |           |           |           | N      | -3.614625 | -1.075384 | -1.346329 | N      | 2.522073  | -2.821417 | -2.241626 |
| N      | -3.642413 | 1.118600  | -1.070753 | C      | -2.687801 | -0.112913 | -0.779316 | C      | 2.221994  | -1.933205 | -1.134861 |
| C      | -2.641663 | 0.580508  | -0.166495 | H      | -2.822061 | 0.855324  | -1.275910 | H      | 2.139178  | -2.457003 | -0.162795 |
| H      | -2.681913 | 1.127260  | 0.782931  | C      | -3.036888 | 0.065617  | -0.707027 | C      | 3.341654  | -0.879165 | -1.004931 |
| C      | -2.994650 | -0.887131 | 0.122362  | H      | -1.233727 | -0.571851 | -0.928607 | C      | 0.814330  | -1.375237 | -1.385047 |
| C      | -1.232431 | 0.687368  | -0.761215 | H      | -4.101271 | 0.302789  | 0.765275  | H      | 4.279775  | -1.416682 | -1.187561 |
| H      | -4.050752 | -0.913940 | 0.399722  | S      | -2.166141 | 1.408193  | 1.580627  | H      | 3.247640  | -0.157339 | -0.182290 |
| H      | -2.879203 | -1.488065 | -0.784846 | H      | -0.994319 | 0.758585  | 1.756742  | C      | 3.439335  | -0.174090 | 0.325199  |
| S      | -2.093525 | -1.670198 | 1.497897  | O      | -0.946294 | -1.759467 | -1.005254 | C      | 3.259916  | 1.207980  | 0.433743  |
| H      | -0.924788 | -1.871913 | 0.851934  | H      | -3.585665 | -1.007342 | -2.359249 | C      | 3.732126  | -0.895749 | 1.489657  |
| O      | -1.059810 | 0.727361  | -1.972511 | H      | -3.244530 | -2.000682 | -1.132765 | C      | 3.032149  | 1.791084  | -0.455066 |
| H      | -3.578241 | 1.232326  | -1.068840 | N      | -0.291128 | 0.407274  | -0.959796 | C      | 3.353782  | 1.849368  | 1.667873  |
| H      | -3.367561 | 0.841619  | -2.012232 | H      | -0.574826 | 1.326363  | -0.646669 | C      | 3.832535  | -0.259179 | 2.720772  |
| N      | -0.206189 | 0.743631  | 0.128888  | C      | 1.104796  | 0.053740  | -0.867719 | H      | 3.893910  | -1.969739 | 1.426935  |
| H      | -0.385476 | 0.520633  | 1.099922  | H      | 1.318690  | -0.687461 | -1.643948 | H      | 3.199432  | 2.922647  | 1.726343  |
| C      | 1.155235  | 0.663424  | -0.316457 | C      | 1.991423  | 1.297961  | -1.099822 | C      | 3.640759  | -1.183348 | 2.814594  |
| H      | 1.192555  | 1.071920  | -1.332302 | C      | 1.388391  | -0.616308 | 0.474138  | H      | 4.064089  | -0.838140 | 3.610459  |
| C      | 2.076445  | 1.474604  | 0.598763  | H      | 1.592406  | 1.750234  | -2.018094 | H      | 3.716529  | 1.616108  | 3.776902  |
| C      | 1.616343  | -0.789722 | -0.408782 | C      | 1.885345  | 2.325168  | 0.027670  | O      | 0.003877  | -2.008624 | -2.054082 |
| H      | 3.105615  | 1.324294  | 0.242663  | C      | 3.447071  | 0.918734  | -1.358168 | H      | 3.115687  | -3.581913 | -1.933025 |
| C      | 1.742190  | 2.956109  | 0.590351  | O      | 0.792453  | -0.391169 | 1.505122  | H      | 1.643172  | -3.212387 | -2.571392 |
| O      | 1.905970  | 0.898984  | 1.884096  | H      | 2.288926  | 1.929691  | 0.965435  | N      | 0.495305  | -0.193822 | -0.810539 |
| O      | 0.948087  | -1.759420 | -0.137519 | H      | 2.455870  | 3.222553  | -0.229345 | H      | 1.158562  | 0.327308  | -0.250858 |
| H      | 0.705381  | 3.116948  | 0.896321  | H      | 0.855741  | 2.640953  | 0.226654  | C      | -0.821282 | 0.369815  | -0.984714 |
| H      | 2.398229  | 3.499213  | 1.279696  | H      | 3.536123  | 0.210790  | -2.187799 | H      | -1.180436 | 0.089695  | -1.980968 |
| H      | 1.883429  | 3.384817  | -0.406399 | H      | 4.028458  | 1.810631  | -1.610609 | C      | -1.806900 | -0.185788 | 0.062749  |
| H      | 2.413564  | 1.413863  | 2.518705  | H      | 3.904664  | 0.457746  | -0.478004 | C      | -0.688787 | 1.878394  | -0.906783 |
| O      | 2.871218  | -0.861069 | -0.822868 | O      | 2.410672  | -1.469001 | 0.387783  | H      | -1.697783 | -1.272932 | 0.033865  |
| C      | 3.393149  | -2.184517 | -0.996724 | C      | 2.749196  | -2.137537 | 1.604667  | H      | -1.490926 | 0.148777  | 1.058363  |
| H      | 4.408744  | -2.065627 | -1.372273 | H      | 3.590219  | -2.785522 | 1.361548  | C      | -3.269406 | 0.175616  | -0.188216 |
| H      | 3.396720  | -2.693011 | -0.029972 | H      | 3.028300  | -1.415918 | 2.376058  | O      | 0.232873  | 2.458308  | -0.378828 |
| H      | 2.788875  | -2.763494 | -1.698740 | H      | 1.900838  | -2.725949 | 1.960858  | H      | -3.440907 | 1.252513  | -0.170857 |
|        |           |           |           |        |           |           |           | H      | -3.565057 | -0.184112 | -1.182642 |
| 119    |           |           |           | 121    |           |           |           | C      | -4.219537 | -0.432548 | 0.813460  |
| CysTrp |           |           |           | PheAsp |           |           |           | O      | -5.110308 | 0.160444  | 1.374394  |
| N      | 3.761112  | -2.935512 | -0.446997 | N      | -2.251833 | 3.551688  | -0.772727 | O      | -1.728695 | 2.496321  | -1.474738 |
| C      | 3.558840  | -1.644922 | 0.178283  | C      | -2.089078 | 2.231131  | -0.195409 | C      | -1.700389 | 3.923971  | -1.399969 |
| H      | 3.702081  | -1.663853 | 1.276206  | H      | -2.342716 | 2.189514  | 0.881695  | H      | -2.610665 | 4.262847  | -1.892512 |
| C      | 4.569488  | -0.654555 | -0.419154 | C      | -3.006451 | 1.233885  | -0.932060 | H      | -1.680146 | 4.253970  | -0.358834 |
| C      | 2.082635  | -1.263894 | -0.031939 | C      | -0.589609 | 1.911007  | -0.240675 | H      | -0.817870 | 4.314100  | -1.911906 |
| H      | 5.514812  | -1.182161 | -0.559623 | H      | -3.953832 | 1.762480  | -1.092724 | O      | -3.973621 | -1.740999 | 1.000471  |
| H      | 4.223390  | -0.308773 | -1.396483 | H      | -2.597491 | 1.046278  | -1.930379 | C      | -4.850967 | -2.391244 | 1.916955  |
| S      | 4.841546  | 0.774809  | 0.696315  | C      | -3.290925 | -0.063798 | -0.216890 | H      | -4.520574 | -3.428704 | 1.959995  |
| H      | 5.328644  | 1.617815  | -0.229117 | C      | -2.936750 | -1.294583 | -0.776860 | H      | -4.790312 | -1.927820 | 2.904840  |
| O      | 1.245158  | -2.142576 | -0.223902 | C      | -3.939123 | -0.064913 | 1.025160  | H      | -5.885079 | -2.332925 | 1.568231  |
| H      | 4.415571  | -3.493639 | 0.086991  | H      | -2.432542 | -1.319748 | -1.739575 |        |           |           |           |
| H      | 2.862977  | -3.413198 | -0.462807 | C      | -3.206565 | -2.490043 | -0.112853 | 123    |           |           |           |
| N      | 1.761684  | 0.042520  | 0.028845  | C      | -4.214085 | -1.254856 | 1.687975  | PheAla |           |           |           |
| H      | 2.459159  | 0.750549  | 0.243616  | H      | -4.241628 | 0.879236  | 1.473058  | N      | -1.926547 | 3.297562  | -0.745186 |
| C      | 0.390491  | 0.468001  | -0.119504 | H      | -2.911139 | -3.432070 | -0.564961 | C      | -1.588383 | 2.009406  | -0.170606 |
| H      | -0.085323 | -0.131840 | -0.900528 | C      | -3.845903 | -2.473961 | 1.121109  | H      | -2.036551 | 1.844206  | 0.828154  |
| C      | -0.408251 | 0.279088  | 1.198993  | H      | -4.720087 | -1.232596 | 2.649107  | C      | -2.090366 | 0.884993  | -1.101219 |
| C      | 0.408219  | 1.921774  | -0.538239 | H      | -4.058386 | -3.403925 | 1.640269  | C      | -0.075471 | 2.023082  | 0.089217  |
| H      | -0.130583 | -0.715675 | 1.564868  | O      | 0.240652  | 2.814908  | -0.231425 | H      | -3.072232 | 1.213299  | -1.462491 |

|        |           |           |           |        |           |           |           |        |           |           |           |
|--------|-----------|-----------|-----------|--------|-----------|-----------|-----------|--------|-----------|-----------|-----------|
| H      | -1.446517 | 0.841722  | -1.985876 | H      | -1.988913 | -2.684504 | 2.364474  | O      | 3.182687  | -1.115201 | -0.938989 |
| C      | -2.236336 | -0.480767 | -0.476933 | H      | -1.007547 | -2.103665 | 3.729191  | C      | 3.551568  | -2.436147 | -1.340495 |
| C      | -1.493267 | -1.574031 | -0.931908 |        |           |           |           | H      | 4.626251  | -2.401035 | -1.511082 |
| C      | -3.142598 | -0.687829 | 0.570989  | 125    |           |           |           | H      | 3.310295  | -3.154991 | -0.554302 |
| H      | -0.781435 | -1.439059 | -1.742310 | PheAsn |           |           |           | H      | 3.023903  | -2.716531 | -2.254901 |
| C      | -1.638293 | -2.832379 | -0.349827 | N      | -1.968137 | 3.551156  | -0.750015 | 127    |           |           |           |
| C      | -3.293948 | -1.941911 | 1.150066  | C      | -1.803022 | 2.227511  | -0.180876 | PhePhe |           |           |           |
| H      | -3.744913 | 0.144168  | 0.929460  | H      | -2.059676 | 2.178808  | 0.895144  | N      | 2.918263  | 3.464026  | 0.642237  |
| H      | -1.041900 | -3.662959 | -0.715568 | C      | -2.716982 | 1.232631  | -0.926234 | C      | 2.609888  | 2.154590  | 0.099555  |
| C      | -2.538940 | -3.020471 | 0.691989  | C      | -0.300974 | 1.910909  | -0.226758 | H      | 2.775023  | 2.084012  | -0.993228 |
| H      | -4.005337 | -2.080461 | 1.959466  | H      | -3.659899 | 1.765632  | -1.097690 | C      | 3.502364  | 1.094359  | 0.777369  |
| H      | -2.655497 | -4.000511 | 1.145421  | H      | -2.298711 | 1.041830  | -1.920150 | C      | 1.098074  | 1.951574  | 0.266481  |
| O      | 0.516342  | 3.084274  | 0.263535  | C      | -3.016701 | -0.063008 | -0.213543 | H      | 4.496045  | 1.550087  | 0.863540  |
| H      | -2.855574 | 3.580574  | -0.457610 | C      | -2.662505 | -1.296358 | -0.767713 | H      | 3.154066  | 0.940882  | 1.804076  |
| H      | -1.258548 | 3.978015  | -0.391542 | C      | -3.682115 | -0.059370 | 1.019398  | C      | 3.635095  | -0.222354 | 0.052665  |
| N      | 0.559779  | 0.833404  | 0.162191  | H      | -2.142620 | 1.326109  | -1.721735 | C      | 3.201848  | -1.419881 | 0.629423  |
| H      | 0.078825  | -0.040569 | -0.008472 | C      | -2.949460 | -2.489501 | -0.106626 | C      | 4.214889  | -0.275073 | -1.221467 |
| C      | 1.978958  | 0.780896  | 0.414134  | C      | -3.974182 | -1.246961 | 1.679202  | H      | 2.749672  | -1.405453 | 1.618154  |
| H      | 2.444550  | 1.629463  | -0.101464 | H      | -3.985290 | 0.887146  | 1.461886  | C      | 3.328530  | -2.631140 | -0.048680 |
| C      | 2.319236  | 0.885984  | 1.903787  | H      | -2.654932 | -3.433676 | -0.555076 | C      | 4.348994  | -1.481387 | -1.898116 |
| C      | 2.523250  | -0.496567 | -0.191990 | C      | -3.606182 | -2.468887 | 1.118199  | H      | 4.575819  | 0.641256  | -1.683656 |
| H      | 1.863351  | 0.064138  | 2.463910  | H      | -4.494637 | -1.220702 | 2.632577  | H      | 2.972396  | -3.545101 | 0.416965  |
| H      | 3.400808  | 0.862956  | 2.055271  | H      | -3.833560 | -3.397298 | 1.634025  | C      | 3.902968  | -2.665710 | -1.313789 |
| H      | 1.927890  | 1.832584  | 2.282150  | O      | 0.524717  | 2.819090  | -0.220833 | H      | 4.805044  | -1.499299 | -2.884041 |
| O      | 1.850908  | -1.377485 | -0.678288 | H      | -2.737395 | 4.035507  | -0.283422 | H      | 4.004371  | -3.608305 | -1.843648 |
| O      | 3.856459  | -0.538082 | -0.107798 | H      | -1.112969 | 4.072814  | -0.574406 | O      | 0.341115  | 2.917493  | 0.296630  |
| C      | 4.459685  | -1.718804 | -0.637362 | N      | 0.069653  | 0.612360  | -0.210233 | H      | 3.694212  | 3.879934  | 0.141169  |
| H      | 5.531379  | -1.597148 | -0.485085 | H      | -0.611845 | -0.132111 | -0.286766 | H      | 2.099488  | 4.052870  | 0.511907  |
| H      | 4.095191  | -2.605168 | -0.112749 | H      | 1.463123  | 0.240852  | -0.282238 | N      | 0.638484  | 0.682762  | 0.340504  |
| H      | 4.233058  | -1.821285 | -1.701281 | H      | 1.968238  | 0.822774  | -1.067546 | H      | 1.254596  | -0.115837 | 0.250741  |
| 124    |           |           |           | C      | 2.230964  | 0.541001  | 1.008733  | C      | -0.777754 | 0.425487  | 0.432866  |
| PheArg |           |           |           | H      | 1.521926  | -1.219503 | -0.688679 | H      | -1.234255 | 1.23948   | 1.036903  |
| N      | 3.632853  | 3.296621  | 0.385511  | H      | 1.894965  | 1.528421  | 1.344942  | C      | -1.438201 | 0.431171  | -0.968736 |
| C      | 3.117719  | 2.026535  | -0.090491 | C      | 1.998267  | -0.185835 | 1.794329  | C      | -0.967744 | -0.913782 | 1.113032  |
| H      | 3.099101  | 1.948713  | -1.194843 | O      | 3.727320  | 0.652111  | 0.762302  | H      | -1.150003 | 1.385151  | -1.422138 |
| C      | 4.002735  | 0.881442  | 0.444394  | O      | 4.192265  | 0.991394  | -0.311042 | H      | -0.984892 | -0.370136 | -1.562842 |
| C      | 1.638438  | 1.969100  | 0.317735  | N      | 4.506240  | 0.381760  | 1.843038  | C      | -2.936321 | 0.298047  | -0.949529 |
| H      | 5.035546  | 1.242668  | 0.370331  | H      | 5.494701  | 0.555482  | 1.763090  | O      | -0.184581 | -1.834293 | 1.027586  |
| H      | 3.808046  | 0.751982  | 1.514172  | H      | 4.117834  | 0.185459  | 2.748602  | C      | -3.558875 | -0.906657 | -1.282783 |
| C      | 3.897293  | -0.436228 | -0.282924 | O      | 2.742007  | -1.729799 | -0.527424 | C      | -3.734528 | 1.384455  | -0.578947 |
| C      | 3.454548  | -1.592807 | 0.365565  | C      | 2.892193  | -3.088980 | -0.936541 | H      | -2.949472 | -1.757073 | -1.581337 |
| C      | 4.258239  | -0.533101 | -1.633104 | H      | 3.934702  | -3.339484 | -0.745569 | C      | -4.945370 | -1.027122 | -1.244960 |
| H      | 3.166003  | -1.543449 | 1.412514  | H      | 2.226851  | -3.738806 | -0.362983 | C      | -5.119512 | 1.267039  | -0.537834 |
| C      | 3.358968  | -2.805679 | -0.314500 | H      | 2.660779  | -3.196006 | -1.998759 | H      | -3.260954 | 2.330519  | -0.325476 |
| C      | 4.170124  | -1.741826 | -2.312927 | 126    |           |           |           | H      | -5.413405 | -1.970183 | -1.513343 |
| H      | 4.622196  | 0.349626  | -2.154624 | PheCys |           |           |           | C      | -5.729602 | 0.059691  | -0.870378 |
| H      | 2.999323  | -3.686091 | 0.209528  | N      | -2.072917 | 3.402978  | -0.899075 | H      | -5.725266 | 2.121913  | -0.250678 |
| C      | 3.716955  | -2.884207 | -1.655208 | C      | -1.812577 | 2.118387  | -0.278483 | H      | -6.811656 | -0.030995 | -0.842910 |
| H      | 4.457803  | -1.794601 | -3.359303 | H      | -2.112782 | 2.076673  | 0.786714  | O      | -2.116316 | -0.965300 | 1.785520  |
| H      | 3.644272  | -3.828200 | -2.187334 | C      | -2.593531 | 1.019530  | -1.028579 | C      | -2.424225 | -2.231265 | 2.369158  |
| O      | 0.997227  | 3.005255  | 0.467962  | C      | -0.288504 | 1.944255  | -0.246876 | H      | -3.385775 | -2.101211 | 2.863530  |
| H      | 4.347769  | 3.644991  | -0.241905 | H      | -3.574599 | 1.453480  | -1.256095 | H      | -2.492016 | -3.001478 | 1.597251  |
| H      | 2.860036  | 3.957828  | 0.391036  | H      | -2.114722 | 0.841663  | -1.997114 | H      | -1.655130 | -2.518455 | 3.090012  |
| N      | 1.074467  | 0.570725  | 0.461269  | C      | -2.797669 | -0.277020 | -0.284775 | 128    |           |           |           |
| H      | 1.599629  | -0.101950 | 0.314201  | C      | -2.283605 | -1.483004 | -0.769632 | PheGly |           |           |           |
| C      | -0.322739 | 0.620287  | 0.803218  | C      | -3.528564 | -0.303178 | 0.910182  | N      | -0.922143 | 3.498064  | -0.474439 |
| H      | -0.595898 | 1.468799  | 1.438595  | H      | -1.714084 | -1.489159 | -1.695637 | C      | -0.915799 | 2.133737  | 0.017435  |
| C      | -1.214587 | 0.640213  | -0.453588 | C      | -2.477270 | -2.676775 | -0.076715 | H      | -1.583500 | 2.079479  | 0.887470  |
| C      | -0.482951 | -0.667316 | 1.586671  | C      | -3.729011 | -1.492188 | 1.600823  | C      | -1.477095 | 1.189596  | -1.072775 |
| H      | -0.902613 | 1.526926  | -1.018434 | H      | -3.955007 | 0.619693  | 1.297457  | C      | 0.488173  | 1.692374  | 0.456256  |
| H      | -0.970690 | -0.235414 | -1.068983 | H      | -2.056963 | -3.597860 | -0.469088 | H      | -2.254326 | 1.768695  | -1.582709 |
| C      | -2.713511 | 0.701964  | -0.187816 | C      | -3.200572 | -2.685113 | 1.109973  | H      | -0.693216 | 0.979766  | -1.809512 |
| O      | 0.270737  | -1.611894 | 1.509608  | H      | -4.301992 | -1.490149 | 2.523879  | C      | -2.064911 | -0.101279 | -0.561023 |
| H      | -3.058953 | -0.194064 | 0.334786  | C      | -3.354502 | -3.614069 | 1.651137  | C      | -1.413970 | -1.326369 | -0.744704 |
| H      | -2.935148 | 1.562258  | 0.459028  | O      | 0.449545  | 2.924257  | -0.229247 | C      | -3.289735 | -0.093203 | 0.118151  |
| C      | -3.505563 | 0.822860  | -1.487952 | H      | -2.914616 | 3.816517  | -0.516351 | H      | -0.454004 | -1.346280 | -1.254211 |
| H      | -3.194369 | 1.715576  | -2.044415 | H      | -1.288826 | 4.015324  | -0.689391 | C      | -1.974526 | -2.508612 | -0.262555 |
| H      | -3.307033 | -0.048602 | -2.118416 | N      | 0.203869  | 0.685530  | -0.192009 | C      | -3.849347 | -1.271597 | 0.599084  |
| N      | -4.941723 | 0.892859  | -1.307917 | H      | -0.396625 | -0.130423 | -0.195534 | H      | -3.813256 | 0.850000  | 0.259882  |
| H      | -5.271541 | 1.716215  | -0.823794 | C      | 1.627793  | 0.463666  | -0.149351 | H      | -1.455943 | -3.450629 | -0.418433 |
| C      | -5.640731 | -0.254693 | -0.989146 | H      | 2.124281  | 1.186837  | -0.805494 | C      | -3.192452 | -2.485886 | 0.409272  |
| N      | -5.056989 | -1.395053 | -0.956177 | C      | 2.153971  | 0.678900  | 1.280773  | H      | -4.803375 | -1.243783 | 1.118082  |
| N      | -6.980853 | 0.017603  | -0.710470 | C      | 1.893375  | -0.941902 | -0.655332 | H      | -3.630337 | -3.407724 | 0.781092  |
| H      | -5.735941 | -2.142819 | -0.833603 | H      | 1.842855  | 1.686245  | 1.562511  | O      | 1.475794  | 2.372163  | 0.219292  |
| H      | -7.392959 | 0.715712  | -1.314629 | H      | 1.686338  | -0.045842 | 1.953656  | H      | -0.631586 | 4.111101  | 0.282567  |
| H      | -7.558654 | -0.806267 | -0.639999 | S      | 3.977973  | 0.581101  | 1.398631  | H      | -0.165056 | 3.579171  | -1.150932 |
| O      | -1.573351 | -0.646239 | 2.357070  | O      | 1.048061  | -1.800798 | -0.765848 | N      | 0.570872  | 0.514054  | 1.139487  |
| C      | -1.838895 | -1.858942 | 3.064009  | H      | 4.071800  | 1.383941  | 2.472722  | H      | -0.219516 | -0.114320 | 1.094215  |
| H      | -2.746910 | -1.673554 | 3.636188  |        |           |           |           |        |           |           |           |

|        |           |           |           |        |           |           |           |        |           |           |           |
|--------|-----------|-----------|-----------|--------|-----------|-----------|-----------|--------|-----------|-----------|-----------|
| C      | 1.866618  | -0.047819 | 1.383458  | N      | 0.100338  | 0.684352  | -0.394625 | C      | -3.035796 | -0.169037 | -0.176931 |
| C      | 2.488438  | -0.668643 | 0.142611  | H      | -0.517020 | -0.117200 | -0.394088 | C      | -2.614724 | -1.421004 | -0.634769 |
| H      | 2.539039  | 0.737274  | 1.738287  | C      | 1.522179  | 0.433130  | -0.388913 | C      | -3.692353 | -0.104509 | 0.059103  |
| H      | 1.807718  | -0.812494 | 2.164384  | H      | 2.004709  | 1.212228  | -0.988762 | H      | -2.100729 | -1.497376 | -1.589562 |
| O      | 1.929821  | -0.845158 | -0.913212 | C      | 2.112807  | 0.508607  | 1.046003  | C      | -2.827829 | -2.571735 | 0.122274  |
| O      | 3.757078  | -1.015848 | 0.386771  | C      | 1.746755  | -0.910796 | -1.051399 | C      | -3.911825 | -1.250298 | 1.814125  |
| C      | 4.442559  | -1.614473 | -0.713088 | H      | 1.738873  | 1.471757  | 1.418903  | H      | -4.044818 | 0.856198  | 1.428539  |
| H      | 4.477675  | -0.926816 | -1.561242 | C      | 1.567200  | -0.604600 | 1.935875  | H      | -2.480160 | -3.530163 | -0.251467 |
| H      | 5.448171  | -1.830669 | -0.354208 | C      | 3.642621  | 0.583621  | 1.045854  | C      | -3.477365 | -2.490227 | 1.348362  |
| H      | 3.941152  | -2.533807 | -1.025611 | O      | 0.897115  | -1.764524 | -1.177382 | H      | -4.426081 | -1.177339 | 2.768391  |
| 129    |           |           |           | H      | 1.958473  | -1.584848 | 1.638441  | H      | -3.646314 | -3.385527 | 1.939524  |
| PheGln |           |           |           | H      | 1.841749  | -0.442235 | 2.981497  | O      | 0.384287  | 2.832045  | -0.497019 |
| N      | -2.373060 | 3.415358  | -1.153985 | H      | 0.475068  | -0.652736 | 1.888391  | H      | -2.923171 | 3.921428  | -0.567258 |
| C      | -2.093327 | 2.190638  | -0.428502 | H      | 4.062476  | -0.376983 | 0.724659  | H      | -1.308849 | 3.997094  | -0.885069 |
| H      | -2.138178 | 2.313440  | -0.670861 | H      | 3.957373  | 1.317992  | 0.293432  | N      | 0.007853  | 0.614791  | -0.317858 |
| C      | -3.126509 | 1.114777  | -0.822795 | C      | 4.230736  | 0.974862  | 2.396963  | H      | -0.646551 | -0.501331 | -0.213826 |
| C      | -0.627640 | 1.833516  | -0.709407 | H      | 4.023464  | 0.225337  | 3.167007  | C      | 1.416766  | 0.294080  | -0.313277 |
| H      | -4.090067 | 1.634909  | -0.883413 | H      | 5.317724  | 1.082654  | 2.331981  | H      | 1.928288  | 1.039800  | -0.928020 |
| H      | -2.909266 | 0.770515  | -1.839374 | H      | 3.823211  | 1.930793  | 2.744243  | C      | 1.986280  | 0.340882  | 1.119780  |
| C      | -3.265368 | -0.054168 | 0.120705  | O      | 3.007789  | -1.055258 | -1.470830 | C      | 1.579253  | -1.074815 | -0.940411 |
| C      | -2.998009 | -1.361314 | -0.296177 | C      | 3.303579  | -2.316564 | -0.072224 | H      | 1.729773  | 1.336330  | 1.503279  |
| C      | -3.686656 | 0.144870  | 1.441883  | H      | 4.356110  | -2.272027 | -2.349096 | H      | 1.432027  | -0.387755 | 1.725678  |
| H      | -2.668033 | -1.541265 | -1.316182 | H      | 3.125494  | -3.131244 | -1.366275 | C      | 3.492165  | 0.116058  | 1.288187  |
| C      | -3.131936 | -2.436312 | 0.580853  | H      | 2.680553  | -2.474337 | -2.955641 | O      | 0.718952  | -1.926115 | -0.961980 |
| C      | -3.825924 | -0.924751 | 2.317821  | 131    |           |           |           | H      | 3.738852  | -0.890989 | 0.925500  |
| H      | -3.917436 | 1.151246  | 1.784617  | PheHis |           |           |           | C      | 4.321193  | 1.119874  | 0.489759  |
| C      | -2.906460 | -3.440663 | 0.235088  | N      | -3.120763 | -3.163290 | -0.834976 | C      | 3.846370  | 0.180651  | 2.773009  |
| H      | -3.546326 | -2.221567 | 1.889968  | C      | -2.627730 | -1.801109 | -0.814293 | H      | 4.049857  | 2.148809  | 0.753756  |
| H      | -4.155477 | -0.747577 | 3.337757  | H      | -2.840736 | -1.244735 | -1.746317 | H      | 5.388562  | 0.992141  | 0.698086  |
| H      | -3.651503 | -3.057365 | 2.575431  | C      | -3.293389 | -1.032411 | 0.353014  | H      | 4.181335  | 0.998039  | -0.587838 |
| O      | 0.178915  | 2.708724  | -1.012089 | C      | -1.094327 | -1.870795 | -0.736256 | H      | 3.275669  | -0.550541 | 3.355490  |
| H      | -3.047294 | 3.978288  | -0.649501 | H      | -4.340327 | -1.356322 | 0.357636  | H      | 4.910863  | -0.018811 | 2.932935  |
| H      | -1.503753 | 3.938708  | -1.222100 | H      | -2.866270 | -1.386941 | 1.296924  | H      | 3.629468  | 1.174752  | 3.181564  |
| N      | -0.255561 | 0.542836  | -0.568118 | C      | -3.250182 | 0.473661  | 0.276966  | O      | 2.804161  | -1.245094 | -1.450017 |
| H      | -0.914542 | -0.182956 | -0.315033 | C      | -2.537683 | 1.233955  | 1.210813  | C      | 3.051310  | -2.534797 | -2.012528 |
| C      | 1.119427  | 0.159352  | -0.780338 | C      | -3.936994 | 1.150083  | -0.739711 | H      | 4.079268  | -2.508381 | -2.371617 |
| H      | 1.516848  | 0.773705  | -1.596657 | H      | -1.992353 | 0.734249  | 2.007620  | H      | 2.927485  | -3.314251 | -1.256956 |
| C      | 1.976872  | 0.401394  | 0.479307  | C      | -2.501928 | 2.625156  | 1.125760  | H      | 2.361475  | -2.730479 | -2.836660 |
| C      | 1.127567  | -1.294921 | -1.207583 | C      | -3.908047 | 2.537053  | -0.824041 | 133    |           |           |           |
| H      | 1.662025  | 1.371616  | 0.874896  | H      | -4.511073 | 0.580072  | -1.467112 | PheLys |           |           |           |
| H      | 1.751505  | -0.345688 | 1.246884  | H      | -1.935243 | 3.190974  | 1.859268  | N      | -2.747664 | 3.306566  | -1.187366 |
| C      | 3.477485  | 0.431461  | 0.227369  | C      | -3.187292 | 3.280625  | 0.109106  | C      | -2.370652 | 2.136867  | -0.416652 |
| O      | 0.195376  | -2.055036 | -1.079254 | H      | -4.452441 | 3.040988  | -1.617785 | H      | -2.347141 | 2.321372  | 0.674795  |
| H      | 3.796110  | -0.474785 | -0.301084 | H      | -3.164268 | 4.364497  | 0.043406  | C      | -3.382746 | 1.001790  | -0.678289 |
| H      | 3.738990  | 1.278107  | -0.419185 | O      | -0.494514 | -2.898399 | -1.020539 | C      | -0.912701 | 1.819553  | -0.778853 |
| C      | 4.253337  | 0.483235  | 1.533379  | H      | -3.915766 | -3.247703 | -1.455837 | H      | -4.368056 | 1.481980  | -0.711126 |
| O      | 3.854211  | -0.046527 | 2.556516  | H      | -2.374115 | -3.761690 | -1.179288 | H      | -3.213640 | 0.599300  | -1.682530 |
| N      | 5.450936  | 1.124141  | 1.467682  | N      | -0.458713 | -0.723137 | -0.387403 | C      | -3.418683 | -0.106791 | 0.344493  |
| H      | 5.999079  | 1.186738  | 2.309855  | H      | -0.999184 | 0.082725  | -0.099174 | C      | -3.113132 | -1.426711 | -0.000092 |
| H      | 5.744006  | 1.635281  | 0.654079  | C      | 0.975591  | -0.656327 | -0.224339 | C      | -3.778852 | 0.163001  | 1.671179  |
| O      | 2.306325  | -1.652390 | -1.731766 | H      | 1.370827  | -1.640508 | -0.483740 | H      | -2.828934 | -1.661415 | -1.022819 |
| C      | 2.404093  | -3.026723 | -2.112995 | C      | 1.566617  | 0.434372  | -1.124351 | C      | -3.151271 | -2.444631 | 0.951414  |
| H      | 3.410538  | -3.151924 | -2.510271 | C      | 1.275160  | -0.341005 | 1.236212  | C      | -3.823792 | -0.850061 | 2.621319  |
| H      | 2.247326  | -3.676832 | -1.249268 | H      | 1.254665  | 0.214689  | -2.153540 | H      | -4.037468 | 1.179658  | 1.959487  |
| H      | 1.658246  | -3.264947 | -2.874642 | H      | 1.098778  | 1.387069  | -0.842179 | H      | -2.898467 | -3.459611 | 0.659692  |
| 130    |           |           |           | C      | 3.051073  | 0.548802  | -1.020973 | C      | -3.507347 | -2.159864 | 2.264386  |
| Phelle |           |           |           | O      | 0.841894  | 0.635960  | 1.805865  | H      | -4.109209 | -0.618604 | 3.643751  |
| N      | -2.174816 | 3.397255  | -1.061964 | N      | 3.725964  | 1.690305  | -1.388290 | H      | -3.539870 | -2.951486 | 3.007264  |
| C      | -1.896514 | 2.142804  | -0.387990 | C      | 4.041840  | -0.317370 | -0.624780 | O      | -0.163923 | 2.708276  | -1.173054 |
| H      | -2.132424 | 2.166236  | 0.693730  | H      | 3.305234  | 2.541774  | -1.722997 | H      | -3.408546 | 3.872987  | -0.669234 |
| C      | -2.738437 | 1.020980  | -1.026930 | C      | 5.054205  | 1.464055  | -1.200980 | H      | -1.906027 | 3.855977  | -1.342917 |
| C      | -0.374377 | 1.948262  | -0.431144 | N      | 5.280810  | 0.260090  | -0.738515 | N      | -0.487781 | 0.548229  | -0.608860 |
| H      | -3.734130 | 1.449999  | -1.193848 | H      | 3.924685  | -1.325286 | -0.251735 | H      | -1.100914 | -0.176631 | -0.258195 |
| H      | -2.338746 | 0.801024  | -2.022469 | H      | 5.804255  | 2.213201  | -1.416199 | C      | 0.883091  | 0.187360  | -0.886017 |
| C      | -2.885890 | -0.244359 | -0.217908 | O      | 2.042822  | -1.267272 | 1.808122  | H      | 1.241278  | 0.825337  | -1.700138 |
| C      | -2.450234 | -1.476745 | -0.713714 | C      | 2.387123  | -1.014310 | 3.171917  | C      | 1.782753  | 0.411425  | 0.345531  |
| C      | -3.479790 | -0.215423 | 1.050562  | H      | 2.992018  | -1.863656 | 3.485835  | C      | 0.893068  | -1.258041 | -1.340243 |
| H      | -1.983856 | -1.524619 | -1.694585 | H      | 2.957671  | -0.086236 | 3.252413  | H      | 1.589912  | 1.441939  | 0.664536  |
| C      | -2.588675 | -2.643021 | 0.036909  | H      | 1.486716  | -0.933866 | 3.785141  | H      | 1.436551  | -0.244688 | 1.154916  |
| C      | -3.623533 | -1.376835 | 1.800207  | 132    |           |           |           | C      | 3.277920  | 0.227961  | 0.111375  |
| H      | -3.842764 | 0.728383  | 1.451575  | PheLeu |           |           |           | O      | 0.053213  | -2.076438 | -1.039103 |
| H      | -2.231808 | -3.585562 | -0.367361 | N      | -2.148100 | 3.434429  | -1.000877 | H      | 3.493706  | -0.805938 | -0.184336 |
| C      | -3.175506 | -2.596745 | 1.296008  | C      | -1.917450 | 2.162479  | -0.342847 | H      | 3.590635  | 0.855196  | -0.734525 |
| H      | -4.089254 | -1.331744 | 2.780755  | H      | -2.145758 | 2.182491  | 0.740370  | C      | 4.100313  | 0.590720  | 1.343351  |
| H      | -3.285438 | -3.503821 | 1.883111  | C      | -2.809787 | 1.081981  | -0.989267 | H      | 3.916825  | 1.632432  | 1.632691  |
| O      | 0.370843  | 2.923460  | -0.452573 | C      | -0.406312 | 1.897617  | -0.406775 | H      | 3.774478  | -0.026649 | 2.193781  |
| H      | -2.994876 | 3.837564  | -0.661829 | H      | -3.778122 | 1.563836  | -1.169969 | C      | 5.596975  | 0.405137  | 1.138330  |
| H      | -1.377113 | 4.009636  | -0.910320 | H      | -2.409221 | 0.836597  | -1.978359 | H      | 5.788098  | -0.635976 | 0.816614  |
|        |           |           |           |        |           |           |           | H      | 5.924618  | 1.046370  | 0.310041  |

|        |           |           |           |        |           |           |           |        |           |           |           |
|--------|-----------|-----------|-----------|--------|-----------|-----------|-----------|--------|-----------|-----------|-----------|
| N      | 6.330368  | 0.806716  | 2.330821  | C      | 2.070603  | 0.268150  | 0.729738  | H      | 2.513292  | 4.045649  | 0.424396  |
| H      | 6.116711  | 0.170098  | 3.092850  | H      | 3.752572  | -1.811244 | -0.579868 | N      | 0.972871  | 0.708406  | 0.333360  |
| H      | 7.328936  | 0.729216  | 2.169009  | H      | 2.817848  | -2.917397 | 0.434056  | H      | 1.568990  | -0.102698 | 0.223450  |
| O      | 1.958710  | -1.533273 | -2.099261 | C      | 3.776547  | -1.250613 | 1.529747  | C      | -0.445767 | 0.480496  | 0.465951  |
| C      | 2.061626  | -2.892505 | -2.526180 | C      | 3.491158  | 0.238373  | 1.343889  | H      | -0.871284 | 1.291851  | 1.061719  |
| H      | 2.974212  | -2.947826 | -3.118268 | H      | 1.324210  | 0.456638  | 1.512132  | C      | -1.140003 | 0.460925  | -0.918646 |
| H      | 2.119624  | -3.563653 | -1.665928 | C      | 1.967254  | 1.389943  | -0.292615 | C      | -0.644790 | -0.839180 | 1.180519  |
| H      | 1.194805  | -3.169737 | -3.130544 | H      | 4.845396  | -1.469958 | 1.591188  | H      | -0.867898 | 1.407999  | -1.732483 |
| 134    |           |           |           | H      | 3.299741  | -1.619766 | 2.444363  | H      | -0.693177 | -0.347004 | -1.508919 |
| PheMet |           |           |           | H      | 4.207210  | 0.664909  | 0.632453  | C      | -2.635117 | 0.311886  | -0.863891 |
| N      | -2.608825 | 3.324796  | -1.202431 | H      | 3.545317  | 0.826310  | 2.261949  | O      | 0.093232  | -1.792525 | 1.058931  |
| C      | -2.276730 | 2.135224  | -0.441755 | O      | 1.934792  | 1.256097  | -1.492768 | C      | -3.255079 | -0.903608 | -1.151828 |
| H      | -2.324357 | 2.288645  | 0.653782  | O      | 1.940992  | 2.572069  | 0.332843  | C      | -3.447420 | 1.392479  | -0.501357 |
| C      | -3.263946 | 1.005195  | -0.800718 | C      | 1.869987  | 3.712543  | -0.525881 | H      | -2.648777 | -1.758391 | -1.443569 |
| C      | -0.797494 | 1.833229  | -0.716520 | H      | 0.964773  | 3.674797  | -1.136237 | C      | -4.637894 | -1.045279 | -1.081511 |
| H      | -4.249011 | 1.481528  | -0.874041 | H      | 1.850404  | 4.578799  | 0.134050  | C      | -4.826287 | 1.247944  | -0.424610 |
| H      | -3.034217 | 0.639705  | -1.807098 | H      | 2.739970  | 3.751207  | -1.185568 | H      | -2.987385 | 2.352832  | -0.279228 |
| C      | -3.351158 | -0.139333 | 0.178485  | 136    |           |           |           | H      | -5.101209 | -2.001407 | -1.318065 |
| C      | -3.030066 | -1.446599 | -0.198901 | PheSer |           |           |           | C      | -5.429227 | 0.042605  | -0.715491 |
| C      | -3.776834 | 0.082684  | 1.494566  | N      | -1.870875 | 3.399437  | -0.786007 | H      | -5.454986 | 2.107985  | -0.147817 |
| H      | -2.696523 | -1.644696 | -1.214457 | C      | -1.629001 | 2.094873  | -0.201694 | O      | -6.782859 | -0.026650 | -0.629725 |
| C      | -3.115672 | -2.498370 | 0.711837  | H      | -2.098237 | 1.966622  | 0.792746  | H      | -7.065661 | -0.915507 | -0.866903 |
| C      | -3.868543 | -0.964103 | 2.403801  | C      | -2.199901 | 1.001624  | -1.132336 | O      | -1.747779 | -0.834734 | 1.927876  |
| H      | -4.049320 | 1.088555  | 1.806723  | C      | -0.119825 | 1.998799  | 0.069189  | C      | -2.066947 | -2.079416 | 2.549254  |
| H      | -2.850133 | -3.502858 | 0.396086  | H      | -3.152678 | 1.396536  | -1.503890 | H      | -2.258649 | -2.844517 | 1.792942  |
| C      | -3.535242 | -2.260666 | 2.015375  | H      | -1.551929 | 0.909431  | -2.010193 | H      | -1.246511 | -2.411267 | 3.189655  |
| H      | -4.203456 | -0.769368 | 3.418787  | C      | -2.446178 | -0.347080 | -0.502610 | H      | -2.964243 | -1.893436 | 3.137774  |
| H      | -3.604006 | -3.078572 | 2.126584  | C      | -1.751690 | -1.486783 | -0.919868 | 138    |           |           |           |
| O      | -0.026716 | 2.734332  | -1.031411 | C      | -3.394588 | -0.488839 | 0.518813  | PheThr |           |           |           |
| H      | -3.311523 | 3.869398  | -0.716958 | H      | -1.009302 | -1.404462 | -1.709765 | N      | -1.683080 | 3.592274  | 0.093842  |
| H      | -1.764845 | 3.886619  | -1.281222 | C      | -1.983326 | -2.726548 | -0.326021 | C      | -1.417522 | 2.173558  | 0.242024  |
| N      | -0.377107 | 0.557945  | -0.557418 | C      | -3.633460 | -1.724399 | 1.108279  | H      | -1.932189 | 1.823365  | 1.146844  |
| H      | -1.010824 | -0.185212 | -0.291220 | H      | -3.960121 | 0.380407  | 0.847876  | C      | -2.007555 | 1.409018  | -0.967639 |
| C      | 1.007655  | 0.214393  | -0.769264 | H      | -1.420737 | -3.592950 | -0.660497 | C      | 0.083182  | 1.887090  | 0.405156  |
| H      | 1.406162  | 0.883403  | -1.539382 | C      | -2.925076 | -2.849356 | 0.688836  | H      | -2.888160 | 1.985703  | -1.270488 |
| C      | 1.833340  | 0.406103  | 0.520994  | H      | -4.376588 | -1.811848 | 1.896022  | H      | -1.296196 | 1.437470  | -1.800801 |
| C      | 1.055790  | -1.214936 | -1.272873 | H      | -3.109169 | -3.814614 | 1.151403  | C      | -2.415808 | -0.014625 | -0.883827 |
| H      | 1.578535  | 1.404206  | 0.891357  | O      | 0.556322  | 3.011707  | 0.200554  | C      | -1.678055 | -1.100059 | -1.166575 |
| H      | 1.497291  | -0.318237 | 1.272598  | H      | -2.768569 | 3.761512  | -0.488517 | C      | -3.557771 | -0.273108 | 0.084809  |
| C      | 3.340355  | 0.314969  | 0.326005  | H      | -1.142808 | 4.027616  | -0.455090 | H      | -0.781485 | -0.915176 | -1.752768 |
| O      | 0.175997  | -2.029312 | -1.109965 | N      | 0.403558  | 0.755783  | 0.197042  | C      | -2.068798 | -2.650498 | -0.881350 |
| H      | 3.634020  | -0.670011 | -0.048517 | H      | -0.172384 | -0.068496 | 0.079370  | C      | -3.951027 | -1.576403 | 0.365043  |
| H      | 3.668738  | 1.064616  | -0.403637 | C      | 1.809309  | 0.550349  | 0.445987  | H      | -4.148079 | 0.561553  | 0.457346  |
| S      | 4.172174  | 0.622014  | 1.913204  | H      | 2.345308  | 1.464422  | 0.183452  | H      | -1.478324 | -3.236801 | -1.260855 |
| C      | 5.891636  | 0.475788  | 1.376645  | C      | 2.045608  | 0.231535  | 1.924277  | C      | -3.205320 | -2.650498 | -0.117811 |
| H      | 6.140795  | 1.232734  | 0.627690  | C      | 2.288387  | -0.608662 | -0.409539 | H      | -4.844186 | -1.755618 | 0.957275  |
| H      | 6.518111  | 0.637045  | 2.256576  | H      | 1.709285  | 1.101693  | 2.506619  | H      | -3.512319 | -3.669629 | 0.099525  |
| H      | 6.102150  | -0.520095 | 0.976508  | H      | 1.414480  | -0.629761 | 2.194379  | O      | 0.916753  | 2.773731  | 0.280617  |
| O      | 2.203984  | -1.478752 | -1.105871 | O      | 3.415085  | -0.040513 | 2.098205  | H      | -1.294838 | 4.072403  | 0.901668  |
| C      | 2.340435  | -2.822371 | -2.374201 | O      | 1.637464  | -1.614274 | -0.592312 | H      | -1.110661 | 3.930001  | -0.677802 |
| H      | 3.318050  | -2.870491 | -2.852018 | H      | 3.562703  | -0.258897 | 3.022508  | N      | 0.427235  | 0.606360  | 0.716995  |
| H      | 2.282929  | -3.527800 | -1.541980 | O      | 3.498724  | -0.393530 | -0.917723 | H      | -0.254367 | -0.133839 | 0.602434  |
| H      | 1.550896  | -3.057910 | -3.091364 | C      | 4.038783  | -1.478320 | -1.672086 | C      | 1.805475  | 0.209464  | 0.674903  |
| 135    |           |           |           | H      | 5.015992  | -1.141651 | -2.015523 | H      | 2.409960  | 1.062082  | 1.001735  |
| PhePro |           |           |           | H      | 4.137947  | -2.366999 | -1.044285 | C      | 2.057612  | -0.980093 | 1.604242  |
| N      | -0.737531 | -0.425122 | -2.094355 | H      | 3.393005  | -1.715390 | -2.521017 | C      | 2.238577  | -0.110540 | -0.755695 |
| C      | -0.405773 | -0.675814 | -0.699852 | 137    |           |           |           | H      | 3.112210  | -1.268661 | 1.486158  |
| H      | -0.308958 | 0.291104  | -0.196258 | PheTyr |           |           |           | C      | 1.779668  | -0.646185 | 3.059834  |
| C      | -1.535865 | -1.459223 | -0.004482 | N      | 3.325417  | 3.442963  | 0.531370  | O      | 1.205880  | -2.008385 | 1.124155  |
| C      | 0.873328  | -1.509170 | -0.596781 | C      | 2.969779  | 2.130760  | 0.025912  | O      | 1.525515  | -0.088481 | -1.728860 |
| H      | -1.745937 | -2.341541 | -0.620397 | H      | 3.101289  | 2.033480  | -1.069297 | H      | 0.747198  | -0.311038 | 3.186743  |
| H      | -1.164180 | -1.838718 | 0.955044  | C      | 3.856603  | 1.062995  | 0.700453  | H      | 1.942780  | -1.526672 | 3.691736  |
| C      | -2.780887 | -0.647445 | 0.237709  | C      | 1.459126  | 1.966343  | 0.241805  | H      | 2.449057  | 0.142997  | 3.415238  |
| C      | -3.149818 | -0.300872 | 1.540459  | H      | 4.861790  | 1.498138  | 0.751306  | H      | 1.236190  | -2.742623 | 1.744900  |
| C      | -3.589445 | -0.213867 | -0.819473 | H      | 3.532622  | 0.936986  | 1.738781  | O      | 3.545961  | -0.401473 | -0.797057 |
| H      | -2.535472 | -0.635694 | 2.373964  | C      | 3.941375  | -0.269516 | -0.001857 | C      | 4.055135  | -0.704298 | -2.095465 |
| C      | -4.292204 | 0.455381  | 1.788852  | C      | 3.487586  | -1.445047 | 0.603704  | H      | 5.117269  | -0.905362 | -1.959199 |
| C      | -4.729929 | 0.543660  | -0.574054 | C      | 4.495908  | -0.359693 | -1.285150 | H      | 3.549190  | -1.578873 | -2.511479 |
| H      | -3.296816 | -0.457259 | -1.835265 | H      | 3.053894  | -1.401763 | 1.599798  | H      | 3.908242  | 0.141811  | -2.770794 |
| H      | -4.561822 | 0.708338  | 1.810660  | C      | 3.570149  | -2.670682 | -0.055048 | 139    |           |           |           |
| C      | -5.087415 | 0.880498  | 0.729565  | C      | 4.586091  | -1.580552 | -1.942711 | PheTrp |           |           |           |
| H      | -5.345678 | 0.871783  | -1.407203 | H      | 4.871886  | 0.538923  | -1.769590 | N      | -2.497437 | 3.721651  | -0.702504 |
| H      | -5.981719 | 1.467966  | 0.917725  | H      | 3.198681  | -3.566720 | 0.432915  | C      | -2.558696 | 2.384341  | -0.144257 |
| O      | 0.929392  | -2.595556 | -1.162329 | C      | 4.120105  | -2.742375 | -1.329476 | H      | -2.774215 | 2.372956  | 0.941714  |
| H      | -0.049112 | 0.219970  | -2.474411 | H      | 5.023410  | -1.627419 | -2.936147 | C      | -3.673089 | 1.583777  | -0.851618 |
| H      | -0.603146 | -1.305382 | -2.589267 | H      | 4.187061  | -3.696384 | -1.844176 | C      | -1.148803 | 1.788824  | -0.259393 |
| N      | 1.918968  | -1.049789 | 0.144887  | O      | 0.727603  | 2.950403  | 0.293688  | H      | -4.502671 | 2.287117  | -0.990489 |
| C      | 3.111447  | -1.873435 | 0.310047  | H      | 4.088116  | 3.834633  | -0.007952 | H      | -3.335089 | 1.318325  | -1.858744 |

|        |           |           |           |        |           |           |           |        |           |           |           |
|--------|-----------|-----------|-----------|--------|-----------|-----------|-----------|--------|-----------|-----------|-----------|
| C      | -4.186772 | 0.368895  | -0.119228 | H      | 3.989993  | 1.629063  | 1.296714  | C      | -1.867542 | 0.131340  | -0.046473 |
| C      | -4.055485 | -0.916309 | -0.652889 | H      | 3.807750  | 0.808331  | 2.853469  | H      | -3.183393 | -0.533914 | 1.461131  |
| C      | -4.829159 | 0.508138  | 1.117922  | H      | 4.172435  | -0.126859 | 1.396633  | H      | -2.609991 | -1.840217 | 0.424328  |
| H      | -3.559867 | -1.050816 | -1.611065 | O      | 3.459919  | -0.611432 | -0.970358 | O      | -2.113333 | 1.170496  | -0.646864 |
| C      | -4.536928 | -2.030793 | 0.032037  | C      | 3.936019  | -1.762408 | -1.669715 | H      | -4.110801 | 0.293175  | -0.816061 |
| C      | -5.316171 | -0.599625 | 1.800959  | H      | 5.011809  | -1.623458 | -1.768900 | H      | -4.975643 | -0.832864 | 0.008901  |
| H      | -4.958029 | 1.500561  | 1.544579  | H      | 3.715495  | -2.673523 | -1.108508 | N      | -0.612182 | -0.230726 | 0.302597  |
| H      | -4.411025 | -3.019405 | -0.399052 | H      | 3.466088  | -1.833225 | -2.653448 | H      | -0.410242 | -1.151624 | 0.668194  |
| C      | -5.169381 | -1.875942 | 1.259874  |        |           |           |           | C      | 0.529575  | 0.564427  | -0.077937 |
| H      | -5.814593 | -0.468001 | 2.757331  | 141    |           |           |           | H      | 0.407900  | 0.886999  | -1.120286 |
| H      | -5.547262 | -2.742528 | 1.794509  | GlyAsp |           |           |           | C      | 0.696930  | 1.812823  | 0.792284  |
| O      | -0.166892 | 2.526323  | -0.306054 | N      | 4.893128  | -0.497878 | -0.511769 | C      | 1.746833  | -0.334733 | 0.000724  |
| H      | -3.141003 | 4.336308  | -0.218891 | C      | 3.939486  | 0.222618  | 0.301313  | H      | 0.831167  | 1.535318  | 1.841917  |
| H      | -1.552673 | 4.071446  | -0.564329 | C      | 2.537950  | -0.270219 | -0.024570 | H      | 1.559649  | 2.397252  | 0.464537  |
| N      | -1.034708 | 0.444003  | -0.268208 | H      | 4.058251  | 0.082776  | 1.391885  | H      | -0.203559 | 2.422530  | 0.698049  |
| H      | -1.841602 | -0.163063 | -0.129358 | H      | 4.006780  | 1.304176  | 0.120349  | O      | 1.734585  | -1.467563 | 0.429364  |
| C      | 0.265489  | -0.177735 | -0.338094 | O      | 2.333902  | -1.413730 | -0.413389 | O      | 2.840326  | 0.282249  | -0.448382 |
| H      | 0.906678  | 0.427888  | -0.984401 | H      | 4.523063  | -1.434615 | -0.653370 | C      | 4.039780  | -0.492203 | -0.392306 |
| C      | 0.929823  | -0.268279 | 1.061891  | H      | 5.781853  | -0.580465 | -0.034303 | H      | 4.824051  | 0.149400  | -0.791624 |
| C      | 0.089545  | -1.550819 | -0.984825 | N      | 1.536242  | 0.611651  | 0.198251  | H      | 4.264043  | -0.777873 | 0.638029  |
| H      | 0.759300  | 0.710437  | 1.524581  | H      | 1.720063  | 1.583593  | 0.409336  | H      | 3.939240  | -1.397313 | -0.995676 |
| H      | 0.389413  | -1.008488 | 1.663001  | C      | 0.162492  | 0.276310  | -0.073885 |        |           |           |           |
| C      | 2.391096  | -0.559490 | 1.033349  | H      | 0.082468  | -0.209001 | -1.054371 | 144    |           |           |           |
| O      | -0.941713 | -2.186780 | -0.907679 | C      | -0.406174 | -0.698307 | 0.975568  | GlyArg |           |           |           |
| C      | 3.029916  | -1.694378 | 1.454344  | C      | -0.611546 | 1.581533  | -0.106346 | N      | 5.557202  | -1.518668 | -0.287934 |
| C      | 3.397384  | 1.618101  | 0.002706  | H      | 0.282236  | -1.550266 | 0.997321  | C      | 4.619687  | -0.864047 | 0.597414  |
| C      | 3.415906  | 0.324339  | 0.545710  | H      | -0.430301 | -0.237114 | 1.965046  | C      | 3.264623  | -0.776004 | -0.090576 |
| H      | 2.616633  | -2.593209 | 1.891863  | C      | -1.786514 | -1.221290 | 0.667287  | H      | 4.436403  | -1.393743 | 1.550447  |
| N      | 4.385589  | -1.572590 | 1.254699  | O      | -0.129687 | 2.663859  | 0.143687  | H      | 4.968233  | 0.142680  | 0.866104  |
| C      | 4.654311  | -0.344429 | 0.701720  | O      | -2.712513 | -1.237540 | 1.441692  | O      | 2.916738  | -1.603773 | -0.924791 |
| C      | 4.599718  | 2.198519  | -0.367411 | O      | -1.888660 | 1.384262  | -0.424552 | H      | 5.024886  | -2.178309 | -0.850761 |
| H      | 2.456723  | 2.150418  | -0.120969 | C      | -2.709623 | 2.555297  | -0.417393 | H      | 6.244334  | -2.041476 | 0.240427  |
| H      | 5.073305  | -2.258805 | 1.510004  | H      | -3.712886 | 2.211690  | -0.663978 | N      | 2.465346  | 0.235000  | 0.314010  |
| C      | 5.866566  | 0.239332  | 0.330711  | H      | -2.695878 | 3.023953  | 0.568845  | H      | 2.788924  | 0.948424  | 0.952804  |
| C      | 5.819311  | 1.516590  | -0.205828 | H      | -2.353662 | 3.273465  | -1.159370 | C      | 1.136748  | 0.414734  | -0.222293 |
| H      | 4.604319  | 3.199106  | -0.789548 | O      | -1.849653 | -1.711542 | -0.580961 | H      | 1.158922  | 0.219675  | -1.300750 |
| H      | 6.810619  | -0.283561 | 0.456744  | C      | -3.123194 | -2.225808 | -0.960234 | C      | 0.129595  | -0.553053 | 0.430066  |
| H      | 6.744071  | 2.000868  | -0.505978 | H      | -3.880105 | -1.438022 | -0.924607 | C      | 0.767682  | 1.865403  | 0.016555  |
| O      | 1.215734  | -1.991772 | -1.507476 | H      | -3.003973 | -2.595012 | -1.978369 | H      | 0.596853  | -1.542579 | 0.364694  |
| C      | 1.150512  | -3.313010 | -2.042413 | H      | -3.427874 | -3.034846 | -0.292050 | H      | 0.045897  | -0.304302 | 1.495892  |
| H      | 0.894283  | -4.033034 | -1.261322 |        |           |           |           | O      | -1.248317 | -0.594570 | -0.218088 |
| H      | 0.398406  | -3.370427 | -2.832950 | 142    |           |           |           | C      | 1.304678  | 2.570640  | 0.842995  |
| H      | 2.142592  | -3.517995 | -2.442461 | GlyGlu |           |           |           | H      | -1.758345 | 0.368004  | -0.126563 |
|        |           |           |           | N      | 4.770502  | -2.055312 | -0.394436 | H      | -1.140760 | -0.807297 | -1.290975 |
| 140    |           |           |           | C      | 3.947660  | -1.316540 | 0.537221  | C      | -2.132244 | -1.660009 | 0.426709  |
| PheVal |           |           |           | C      | 2.625625  | -0.973535 | -0.132636 | H      | -1.659973 | -2.647026 | 0.349619  |
| N      | -2.089220 | 3.392149  | -0.838749 | H      | 3.680927  | -1.866784 | 1.458338  | H      | -2.260244 | -1.433692 | 1.489140  |
| C      | -1.796658 | 2.094983  | -0.258405 | H      | 4.451156  | -0.395837 | 0.862889  | N      | -3.460471 | -1.759318 | -0.143824 |
| H      | -2.170829 | 1.985235  | 0.778047  | O      | 2.149869  | -1.680748 | -1.012517 | H      | -3.490079 | -2.066946 | -1.105838 |
| C      | -2.453459 | 0.992054  | -1.112012 | H      | 4.142978  | -2.596775 | -0.984268 | C      | -4.400833 | -0.794267 | 0.158917  |
| C      | -0.270997 | 2.012664  | -0.111005 | H      | 5.374867  | -2.702411 | 0.096182  | N      | -4.151996 | 0.122332  | 1.019376  |
| H      | -3.451652 | 1.366538  | -1.370066 | N      | 1.991556  | 0.123315  | 0.341092  | N      | -5.569064 | -0.959479 | -0.586309 |
| H      | -1.913054 | 0.908348  | -2.060790 | H      | 2.439849  | 0.762122  | 0.983356  | H      | -4.988533 | 0.667080  | 1.215954  |
| C      | -2.598192 | -0.359411 | -0.456220 | C      | 0.724868  | 0.545908  | -0.204246 | H      | -5.847348 | -1.923977 | -0.706830 |
| C      | -1.995861 | -1.498313 | -0.999043 | H      | 0.747300  | 0.409904  | -1.293185 | H      | -6.336525 | -0.383499 | -0.275107 |
| C      | -3.356731 | -0.506571 | 0.712279  | C      | -0.440262 | -0.284504 | 0.368969  | O      | -0.226623 | 2.267260  | -0.773928 |
| H      | -1.400504 | -1.409543 | -1.904413 | C      | 0.591022  | 2.024621  | 0.105104  | C      | -0.676865 | 3.605641  | -0.551260 |
| C      | -2.131834 | -2.743400 | -0.387389 | H      | -0.110851 | -1.326628 | 0.343280  | H      | -1.476565 | 3.770021  | -1.271928 |
| C      | -3.498835 | -1.747284 | 1.322141  | H      | -0.596011 | -0.030193 | 1.422642  | H      | -1.051150 | 3.717876  | 0.468713  |
| H      | -3.850085 | 0.361552  | 1.143881  | C      | -1.741317 | -0.160754 | -0.407287 | H      | 0.139145  | 4.313973  | -0.711159 |
| H      | -1.644324 | -3.610136 | -0.823626 | O      | 1.296714  | 2.621193  | 0.887523  |        |           |           |           |
| C      | -2.883507 | -2.871945 | 0.774646  | H      | -2.100852 | 0.873198  | -0.445404 | 145    |           |           |           |
| H      | -4.093915 | -1.838877 | 2.226505  | H      | -1.608267 | -0.464995 | -1.452385 | GlyAsn |           |           |           |
| H      | -2.992139 | -3.841122 | 1.252626  | C      | -2.833836 | -1.007966 | 0.192389  | N      | 4.647069  | 0.211735  | -0.375308 |
| O      | 0.387050  | 3.033443  | 0.066669  | O      | -2.759220 | -1.624627 | 1.229000  | C      | 3.606258  | -0.733370 | -0.036322 |
| H      | -2.986998 | 3.730006  | -0.512648 | O      | -0.408748 | 2.592255  | -0.573985 | C      | 2.297189  | 0.018469  | 0.156818  |
| H      | -1.370524 | 4.038323  | -0.522000 | C      | -0.609356 | 3.983178  | -0.306574 | H      | 3.489616  | -1.489489 | -0.824612 |
| N      | 0.297495  | 0.787645  | -0.134134 | H      | -1.453791 | 4.282963  | -0.925557 | H      | 3.772641  | -1.288542 | 0.905590  |
| H      | -0.247300 | -0.048476 | -0.300015 | H      | -0.829934 | 4.142635  | 0.751252  | O      | 2.281686  | 1.181426  | 0.543010  |
| C      | 1.721880  | 0.632818  | 0.042783  | H      | 0.283381  | 4.553826  | -0.571642 | H      | 4.430773  | 1.079805  | 0.109229  |
| H      | 2.212812  | 1.512463  | -0.386970 | O      | -3.934457 | -0.985505 | -0.578381 | H      | 5.547187  | -0.113621 | -0.045348 |
| C      | 2.107219  | 0.563341  | 1.545016  | C      | -5.028276 | -1.754509 | -0.083103 | N      | 1.174204  | -0.688599 | -0.099075 |
| C      | 2.144262  | -0.598401 | -0.733153 | H      | -5.828995 | -1.637288 | -0.812885 | H      | 1.220864  | -1.667222 | -0.351227 |
| H      | 1.605314  | 1.440619  | 1.972141  | H      | -4.749124 | -2.806808 | 0.012292  | C      | -0.146933 | -0.194347 | 0.207136  |
| C      | 1.557422  | -0.689697 | 2.219234  | H      | -5.347074 | -1.388884 | 0.896360  | C      | -0.213206 | 0.136077  | 1.254643  |
| C      | 3.605331  | 0.725764  | 1.780909  |        |           |           |           | C      | -0.546120 | 1.019895  | -0.637642 |
| O      | 1.391616  | -1.479122 | -1.085896 | 143    |           |           |           | C      | -1.092129 | -1.369294 | 0.032140  |
| H      | 2.051658  | -1.595178 | 1.847876  | GlyAla |           |           |           | H      | 0.341483  | 1.660191  | -0.695209 |
| H      | 1.722909  | -0.645214 | 3.300047  | N      | -4.106768 | -0.668332 | -0.483620 | H      | -0.825589 | 0.729516  | -1.656032 |
| H      | 0.482096  | -0.801681 | 2.049905  | C      | -2.977642 | -0.804808 | 0.409171  | C      | -1.635655 | 1.836891  | 0.037770  |

|        |           |           |           |        |           |           |            |        |           |           |           |
|--------|-----------|-----------|-----------|--------|-----------|-----------|------------|--------|-----------|-----------|-----------|
| O      | -0.726003 | -2.506069 | -0.177571 | H      | -2.571441 | -1.743941 | -0.260179  | C      | 3.213281  | -2.033492 | -0.915096 |
| O      | -1.803342 | 1.838566  | 1.244451  | O      | -2.070324 | 1.439198  | 0.039844   | H      | 3.826330  | -1.832661 | -1.792541 |
| N      | -2.389122 | 2.591570  | -0.805587 | H      | -4.104874 | 0.703626  | -0.336996  | H      | 3.781467  | -1.856609 | 0.001041  |
| H      | -3.026409 | 3.252896  | -0.392499 | H      | -4.932914 | -0.678917 | -0.022352  | H      | 2.862745  | -3.067942 | -0.918123 |
| H      | -2.165720 | 2.681217  | -1.781463 | N      | -0.545865 | -0.221970 | 0.149779   |        |           |           |           |
| O      | -2.366396 | -1.004255 | 0.130969  | H      | -0.331832 | -1.209117 | 0.117202   | 151    |           |           |           |
| C      | -3.316688 | -2.063147 | 0.004118  | C      | 0.573528  | 0.672829  | 0.100894   | GlyHis |           |           |           |
| H      | -4.293335 | -1.595146 | 0.117516  | C      | 1.841102  | -0.138185 | 0.007879   | N      | 4.922795  | -1.236096 | 0.136010  |
| H      | -3.228672 | -2.542895 | -0.973544 | H      | 0.508752  | 1.350233  | -0.759846  | C      | 4.144965  | -0.018795 | 0.197281  |
| H      | -3.157781 | -2.813647 | 0.781752  | H      | 0.623925  | 1.317093  | 0.988070   | C      | 2.730486  | -0.313236 | -0.277422 |
|        |           |           |           | O      | 1.876604  | -1.347720 | -0.022676  | H      | 4.122799  | 0.379787  | 1.220765  |
| 146    |           |           |           | O      | 2.915158  | 0.649697  | -0.034106  | H      | 4.510862  | 0.801704  | -0.447674 |
| GlyCys |           |           |           | C      | 4.166298  | -0.035028 | -0.125420  | O      | 2.502136  | -1.179210 | -1.111826 |
| N      | -4.544213 | -0.345969 | -0.445385 | H      | 4.207303  | -0.637970 | -1.035455  | H      | 4.594009  | -1.764055 | -0.668751 |
| C      | -3.443643 | -0.644424 | 0.442845  | H      | 4.927286  | 0.743716  | -0.147406  | H      | 5.903208  | -1.027581 | -0.006583 |
| C      | -2.192409 | 0.054706  | -0.066355 | H      | 4.309522  | -0.688213 | 0.738412   | N      | 1.759253  | 0.476629  | 0.238763  |
| H      | -3.577416 | -0.294576 | 1.483476  |        |           |           |            | H      | 1.944796  | 1.114384  | 1.000133  |
| H      | -3.269024 | -1.727437 | 0.501890  | 149    |           |           |            | C      | 0.377406  | 0.341445  | -0.160933 |
| O      | -2.254776 | 1.100049  | -0.701232 | GlyGln |           |           |            | H      | 0.335393  | 0.182169  | -1.241754 |
| H      | -4.395869 | 0.592845  | -0.807293 | N      | 4.816972  | -1.125645 | -0.301920  | C      | -0.275737 | -0.854922 | 0.559350  |
| H      | -5.423353 | -0.354366 | 0.056191  | C      | 3.827930  | -0.573198 | 0.596917   | C      | -0.306910 | 1.644894  | 0.208155  |
| N      | -1.015349 | -0.520011 | 0.275636  | C      | 2.476225  | -0.558758 | -0.101009  | H      | 0.361994  | -1.718492 | 0.333265  |
| H      | -0.973508 | -1.430493 | 0.714430  | H      | 3.675812  | -1.147841 | 1.529142   | H      | -0.201178 | -0.669737 | 1.638735  |
| C      | 0.246080  | 0.031508  | -0.150379 | H      | 4.100531  | 0.445896  | 0.903926   | C      | -1.692815 | -1.128592 | 0.179211  |
| H      | 0.189730  | 0.328410  | -1.204860 | O      | 2.193706  | -1.377354 | -0.0968239 | O      | -0.043130 | 2.263035  | 1.216778  |
| C      | 0.590926  | 1.281213  | 0.677844  | H      | 4.342033  | -1.811718 | -0.883800  | N      | -2.546666 | -1.810544 | 1.016690  |
| C      | 1.278376  | -1.071446 | 0.006247  | H      | 5.543786  | -1.603702 | 0.215698   | C      | -2.445284 | -0.887490 | -0.944843 |
| H      | -0.269352 | 1.945659  | 0.583924  | N      | 1.598692  | 0.373188  | 0.333073   | H      | -2.319378 | -2.156839 | 1.934618  |
| H      | 0.716694  | 1.001851  | 1.727993  | H      | 1.871449  | -1.106757 | 0.972752   | C      | -3.738233 | -1.944720 | 0.374570  |
| S      | 2.071371  | 2.163993  | 0.063715  | C      | 0.276893  | 0.476950  | -0.235631  | N      | -3.712719 | -1.394097 | -0.813456 |
| O      | 1.068715  | -2.116542 | 0.581599  | H      | 0.349730  | 0.335992  | -1.321582  | H      | -2.142948 | -0.361356 | -1.839103 |
| H      | 1.634923  | 3.388753  | 0.403863  | C      | -0.674149 | -0.592127 | 0.339538   | H      | -4.584043 | -2.447399 | 0.823931  |
| O      | 2.438892  | -0.737510 | -0.547535 | C      | -0.207182 | 1.885380  | 0.049483   | O      | -1.217008 | 2.015093  | -0.685975 |
| C      | 3.493994  | -1.690038 | -0.390319 | H      | -0.092929 | -1.517575 | 0.387263   | C      | -1.957480 | 3.192290  | -0.352818 |
| H      | 4.358608  | -1.252681 | -0.886461 | H      | -0.961484 | -0.339031 | 1.364849   | H      | -2.657783 | 3.340404  | -1.173155 |
| H      | 3.701236  | -1.857534 | 0.668862  | C      | -1.926392 | -0.834715 | -0.490601  | H      | -2.493539 | 3.049942  | 0.587979  |
| H      | 3.219724  | -2.639545 | -0.855182 | O      | 0.322826  | 2.639532  | 0.834438   | H      | -1.287188 | 4.049238  | -0.255574 |
|        |           |           |           | H      | -2.451118 | 0.109490  | -0.678548  |        |           |           |           |
| 147    |           |           |           | H      | -1.660755 | -1.247019 | -1.471688  | 152    |           |           |           |
| GlyPhe |           |           |           | C      | -2.898672 | -1.746842 | 0.239825   | GlyLeu |           |           |           |
| N      | 5.028758  | -1.297015 | -0.454473 | O      | -3.011799 | -1.747164 | 1.453962   | N      | 4.709668  | -0.009586 | 0.425585  |
| C      | 4.240789  | -0.414855 | 0.376935  | N      | -3.668748 | -2.530080 | -0.561348  | C      | 3.654787  | -0.282493 | -0.524997 |
| C      | 2.772650  | -0.566688 | 0.010000  | H      | -4.324549 | -3.154194 | -0.120752  | C      | 2.321764  | 0.133733  | 0.080264  |
| H      | 4.300067  | -0.622880 | 1.461479  | H      | -3.518517 | -2.598732 | -1.552237  | H      | 3.735470  | 0.271859  | -1.478325 |
| H      | 4.551912  | 0.630628  | 0.246090  | O      | -1.300648 | 2.193542  | -0.652464  | H      | 3.629106  | -1.348680 | -0.789185 |
| O      | 2.328416  | -1.621732 | -0.430018 | C      | -1.839991 | 3.492879  | -0.392714  | O      | 2.247397  | 1.043203  | 0.897925  |
| H      | 4.461314  | -2.119880 | -0.642843 | H      | -2.710457 | 3.585046  | -1.040721  | H      | 4.425949  | 0.807870  | 0.960701  |
| H      | 5.864146  | -1.597067 | 0.032105  | H      | -2.129697 | 3.584211  | 0.656452   | H      | 5.574034  | 0.213392  | -0.051752 |
| N      | 1.987817  | 0.507013  | 0.250269  | H      | -1.102902 | 4.264321  | -0.625816  | N      | 1.235875  | -0.526895 | -0.379403 |
| H      | 2.370366  | 1.403101  | 0.520075  |        |           |           |            | H      | 1.319410  | -1.326770 | -0.991326 |
| C      | 0.577984  | 0.473312  | -0.043752 | 150    |           |           |            | C      | -0.094693 | -0.212460 | 0.086853  |
| H      | 0.423878  | -0.015585 | -1.012606 | GlyIle |           |           |            | H      | -0.042173 | 0.014774  | 1.156527  |
| C      | -0.215509 | -0.323864 | 1.025120  | N      | -4.121910 | 0.512422  | -1.102038  | C      | -0.666904 | 1.009733  | -0.660760 |
| O      | 0.110730  | 1.911584  | -0.133855 | C      | -2.705679 | 0.269235  | -0.952239  | C      | -0.934075 | -1.455826 | -0.122106 |
| H      | 0.417017  | -1.182070 | 1.271818  | C      | -2.350199 | -0.571803 | 0.277835   | H      | 0.087081  | 1.797850  | -0.544085 |
| H      | -0.313147 | 0.282599  | 1.932512  | H      | -2.334639 | -0.258123 | -1.843040  | H      | -0.708073 | 0.761454  | -1.729274 |
| C      | -1.555979 | -0.820613 | 0.556500  | H      | -2.171866 | 1.226721  | -0.930024  | C      | -2.023480 | 1.550303  | -0.198137 |
| O      | 0.764071  | 2.859803  | 0.245677  | O      | -3.225745 | -1.097440 | 0.947934   | O      | -0.647983 | -2.345543 | -0.892997 |
| C      | -2.750041 | -0.288133 | 1.043443  | H      | -4.433126 | 1.072953  | -0.313620  | H      | -2.783409 | 0.773072  | -0.354079 |
| C      | -1.614481 | -1.851407 | -0.387269 | H      | -4.598126 | -0.376517 | -0.969325  | C      | -2.025178 | 1.920703  | 1.283687  |
| H      | -2.717355 | 0.510403  | 1.781074  | N      | -1.031400 | -0.736645 | 0.573788   | C      | -2.400785 | 2.756327  | -1.056936 |
| C      | -3.978000 | -0.770740 | 0.598769  | H      | -0.825529 | -1.374369 | 1.332914   | H      | -1.218215 | 2.627108  | 1.511331  |
| C      | -2.839257 | -2.331536 | -0.837291 | C      | 0.107372  | -0.201031 | -0.133050  | H      | -2.972388 | 2.393914  | 1.562623  |
| H      | -0.686015 | -2.279743 | -0.759922 | H      | -0.122677 | -0.099509 | -1.199172  | H      | -1.898102 | 1.043148  | 1.924015  |
| H      | -4.898814 | -0.348861 | 0.991965  | C      | 0.545703  | 1.192770  | 0.402740   | H      | -2.420424 | 2.502378  | -2.122222 |
| C      | -4.025785 | -1.792135 | -0.345047 | C      | 1.224559  | -1.224689 | -0.002599  | H      | -3.389602 | 3.138831  | -0.784291 |
| H      | -2.868321 | -3.134362 | -1.568600 | H      | -0.376290 | 1.792163  | 0.377484   | H      | -1.680124 | 3.571467  | -0.921503 |
| H      | -4.982965 | -2.170334 | -0.692374 | C      | 1.009213  | 1.116838  | 1.854389   | O      | -2.037674 | -1.448865 | 0.628408  |
| O      | -1.109686 | 2.003135  | -0.653817 | C      | 1.562787  | 1.874195  | -0.518380  | C      | -2.900048 | -2.574892 | 0.449129  |
| C      | -1.645904 | 3.325270  | -0.726483 | O      | 1.316419  | -2.012993 | 0.909894   | H      | -3.745076 | -2.407670 | 1.115476  |
| H      | -2.648981 | 3.212152  | -1.134961 | H      | 1.957199  | 0.575259  | 1.946047   | H      | -3.234749 | -2.641124 | -0.588617 |
| H      | -1.682278 | 3.780563  | 0.265878  | H      | 1.153883  | 2.116999  | 2.270542   | H      | -2.379766 | -3.498639 | 0.712051  |
| H      | -1.032450 | 3.950528  | -1.379431 | H      | 0.269421  | 0.606092  | 2.477162   |        |           |           |           |
|        |           |           |           | H      | 2.521812  | 1.345515  | -0.463382  | 153    |           |           |           |
| 148    |           |           |           | H      | 1.224941  | 1.771649  | -1.558212  | GlyLys |           |           |           |
| GlyGly |           |           |           | C      | 1.772451  | 3.352165  | -0.208850  | N      | 4.807239  | -1.853712 | -0.347641 |
| N      | -4.098336 | -0.306530 | -0.457700 | H      | 2.201540  | 3.506576  | 0.785693   | C      | 3.923874  | -1.180202 | 0.578034  |
| C      | -2.911112 | -0.805730 | 0.199947  | H      | 2.455163  | 3.807646  | -0.932270  | C      | 2.587710  | -0.927589 | -0.105654 |
| C      | -1.814068 | 0.244242  | 0.105151  | H      | 0.827297  | 3.904698  | -0.252747  | H      | 3.687151  | -1.754047 | 1.493035  |
| H      | -3.032311 | -1.015188 | 1.278797  | O      | 2.106414  | -1.131581 | -1.001475  | H      | 4.357119  | -0.228113 | 0.914437  |

|        |           |           |           |        |           |           |           |        |           |           |           |
|--------|-----------|-----------|-----------|--------|-----------|-----------|-----------|--------|-----------|-----------|-----------|
| O      | 2.174021  | -1.664108 | -0.992900 | H      | 0.475671  | 0.291234  | -1.567626 | C      | -2.992077 | -1.073478 | 0.578167  |
| H      | 4.224587  | -2.427712 | -0.952789 | C      | 1.439409  | -0.348649 | 0.224351  | C      | -1.913407 | -0.371915 | -0.231845 |
| H      | 5.444526  | -2.466244 | 0.145623  | H      | -0.053673 | 3.883832  | 0.073423  | H      | -2.840234 | -0.875543 | 1.647763  |
| N      | 1.876702  | 0.122489  | 0.362706  | H      | -0.624054 | 3.030819  | -1.371401 | H      | -2.815287 | -2.155626 | 0.433451  |
| H      | 2.262314  | 0.767507  | 1.038385  | H      | 1.595794  | 2.158935  | 0.538755  | O      | -2.124998 | 0.020707  | -1.372361 |
| C      | 0.579255  | 0.457150  | -0.175327 | H      | 1.725840  | 2.287997  | -1.221446 | H      | -4.220456 | -0.403999 | -0.849051 |
| H      | 0.597119  | 0.305520  | -1.260864 | O      | 1.272906  | -0.781971 | 1.337682  | H      | -4.989774 | -1.328265 | 0.268895  |
| C      | -0.525774 | -0.435515 | 0.244550  | O      | 2.514021  | -0.610459 | -0.533703 | N      | -0.711864 | -0.243155 | 0.381316  |
| C      | 0.355894  | 1.926596  | 0.121173  | C      | 3.494030  | -1.448712 | 0.079506  | H      | -0.546966 | -0.680603 | 1.276391  |
| H      | -0.159193 | -1.462028 | 0.315352  | H      | 3.060393  | -2.416857 | 0.340904  | C      | 0.455756  | 0.187257  | -0.338142 |
| H      | -0.594928 | -0.231436 | 1.501097  | H      | 4.285045  | -1.570733 | -0.659463 | H      | 0.237114  | 0.106622  | -1.409054 |
| C      | -1.895914 | -0.320521 | -0.233617 | H      | 3.885308  | -0.983256 | 0.987400  | C      | 0.852450  | 1.641723  | -0.042193 |
| O      | 0.949857  | 2.540857  | 0.980317  |        |           |           |           | C      | 1.605052  | -0.742763 | 0.015815  |
| H      | -2.286901 | 0.698247  | -0.126646 | 156    |           |           |           | H      | 1.700681  | 1.874987  | -0.704488 |
| C      | -1.791346 | -0.493354 | -1.313517 | GlySer |           |           |           | C      | -0.283338 | 2.614486  | -0.298723 |
| H      | -2.894564 | -1.317458 | 0.344625  | N      | -4.279702 | -0.731045 | -0.417907 | O      | 1.266350  | 1.653737  | 1.312881  |
| H      | -2.528474 | -2.343523 | 0.219491  | C      | -3.171891 | -0.719370 | 0.510598  | O      | 1.550918  | -1.610407 | 0.854693  |
| H      | -2.986958 | -1.153742 | 1.428727  | C      | -2.009052 | 0.040028  | -0.112271 | H      | -1.117197 | 2.404580  | 0.375892  |
| C      | -4.273568 | -1.217995 | -0.292069 | H      | -3.378338 | -0.213195 | 1.471881  | H      | 0.052818  | 3.643536  | -0.127142 |
| H      | -4.636820 | -0.177173 | -0.198706 | H      | -2.857427 | -1.741732 | 0.761805  | H      | -0.647518 | 2.540002  | -1.326613 |
| H      | -4.183199 | -1.415230 | -1.367908 | O      | -2.191037 | 0.929102  | -0.933790 | H      | 1.444540  | 2.565906  | 1.561295  |
| N      | -5.170373 | -2.217477 | 0.271419  | H      | -4.230211 | 0.130757  | -0.956138 | O      | 2.687607  | -0.473778 | -0.719535 |
| H      | -5.348640 | -2.003937 | 1.248250  | H      | -5.162995 | -0.742438 | 0.076192  | C      | 3.833830  | -1.269147 | -0.415506 |
| H      | -6.070588 | -2.181508 | -0.195040 | N      | -0.778863 | -0.300824 | 0.337845  | H      | 4.618166  | -0.928698 | -1.090526 |
| O      | -0.582813 | 2.462986  | -0.660501 | H      | -0.641831 | -1.063441 | 0.986958  | H      | 4.132592  | -1.125219 | 0.625410  |
| C      | -0.868612 | 3.840114  | -0.404799 | C      | 0.416617  | 0.351887  | -0.136193 | H      | 3.620140  | -2.328084 | -0.578634 |
| H      | -1.648525 | 4.115463  | -1.113385 | H      | 0.322626  | 0.572692  | -1.203081 |        |           |           |           |
| H      | -1.214873 | 3.977011  | 0.622238  | C      | 0.632060  | 1.670502  | 0.167741  | 159    |           |           |           |
| H      | 0.024324  | 4.449828  | -0.559997 | C      | 1.572519  | -0.599522 | 0.103645  | GlyTrp |           |           |           |
|        |           |           |           | H      | -0.250144 | 2.292829  | 0.415658  | N      | 4.821074  | -2.427242 | -0.303339 |
| 154    |           |           |           | H      | 0.661371  | 1.446119  | 1.696059  | C      | 4.402199  | -1.220524 | 0.374050  |
| GlyMet |           |           |           | O      | 1.825273  | 2.259393  | 0.163661  | C      | 2.920405  | -0.993131 | 0.114735  |
| N      | -4.857447 | -1.336252 | 0.407702  | O      | 1.584906  | -1.407947 | 1.007721  | H      | 4.511329  | -1.244432 | 1.474267  |
| C      | -3.923531 | -0.752706 | -0.529171 | H      | 1.875701  | 3.148313  | 0.525588  | H      | 4.979642  | -0.353449 | 0.025256  |
| C      | -2.552165 | -0.670389 | 0.123737  | O      | 2.555139  | -0.434688 | -0.772946 | O      | 2.158047  | -1.933576 | -0.083766 |
| H      | -3.775662 | -1.332157 | -1.459268 | C      | 3.707240  | -1.249621 | -0.552200 | H      | 4.028017  | -3.064213 | -0.300878 |
| H      | -4.251100 | 0.249289  | -0.838826 | H      | 4.404836  | -0.994345 | -1.348479 | H      | 5.581692  | -2.872329 | 0.194742  |
| O      | -2.202285 | -1.468311 | 0.984377  | H      | 4.145100  | -1.034209 | 0.255192  | N      | 2.502268  | 0.289378  | 0.170546  |
| H      | -4.336714 | -1.997830 | 0.978628  | H      | 3.442066  | -2.308565 | -0.596272 | H      | 3.151349  | 1.059044  | 0.261720  |
| H      | -5.582473 | -1.847096 | -0.080248 |        |           |           |           | C      | 1.116450  | 0.640356  | -0.019223 |
| N      | -1.733644 | 0.300069  | -0.344300 | 157    |           |           |           | C      | 0.701207  | 0.046931  | -0.840581 |
| H      | -2.061236 | 1.014498  | -0.979815 | GlyTyr |           |           |           | H      | 0.276603  | 0.359690  | 1.257296  |
| C      | -0.399913 | 0.470419  | 0.177148  | N      | 5.124186  | -1.861808 | -0.508934 | C      | 1.083125  | 2.106379  | -0.393084 |
| H      | -0.418403 | 0.301141  | 1.260661  | C      | 4.486669  | -0.855804 | 0.310774  | H      | 0.626832  | -0.612496 | 1.621305  |
| C      | 0.579686  | -0.539085 | -0.458562 | C      | 3.000712  | -0.821001 | -0.011833 | H      | 0.531772  | 1.101910  | 2.022271  |
| C      | -0.007414 | 1.909582  | -0.096530 | H      | 4.550926  | -1.035357 | 1.400089  | C      | -1.194596 | 0.301773  | 1.027566  |
| H      | 0.079007  | -1.510715 | -0.403249 | H      | 4.930163  | 0.133839  | 0.134885  | O      | 2.001346  | 2.873830  | -0.193543 |
| H      | 0.709006  | -0.294988 | -1.519683 | O      | 2.407237  | -1.820707 | -0.402436 | C      | -2.149814 | 1.183640  | 1.455287  |
| C      | 1.929098  | -0.635209 | 0.239173  | H      | 4.445152  | -2.604768 | -0.655806 | C      | -1.471012 | -1.887575 | -0.366706 |
| O      | -0.577163 | 2.627489  | -0.888001 | H      | 5.924440  | -2.258399 | -0.032543 | C      | -1.889001 | -0.722761 | 0.294828  |
| H      | 2.460135  | 0.320556  | 0.212274  | N      | 2.373914  | 0.355289  | 0.210823  | H      | -2.038972 | 2.086343  | 2.040803  |
| H      | 1.786282  | -0.914645 | 1.289833  | H      | 2.881155  | 1.199358  | 0.439596  | N      | -3.392157 | 0.773828  | 1.030302  |
| S      | 2.940126  | -1.902737 | -0.583360 | C      | 0.962722  | 0.502260  | -0.040307 | C      | -3.266082 | -0.393960 | 0.318097  |
| C      | 4.425529  | -1.802484 | 0.440982  | H      | 0.712280  | 0.011904  | -0.988152 | C      | -2.427355 | -2.678552 | -0.982498 |
| H      | 4.209748  | -2.061320 | 1.481354  | C      | 0.105203  | -0.152060 | 1.076532  | H      | -0.418003 | -2.160165 | -0.388844 |
| H      | 5.140376  | -2.525966 | 0.043171  | C      | 0.688675  | 1.986687  | -0.161250 | H      | -4.258742 | 1.235720  | 1.241914  |
| H      | 4.875367  | -0.806589 | 0.395791  | H      | 0.637279  | -1.069930 | 1.344495  | C      | -4.230800 | -1.190518 | -0.300701 |
| O      | 1.048956  | 2.288850  | 0.624978  | H      | 0.106890  | 0.494715  | 1.961167  | C      | -3.790492 | -2.333188 | -0.950440 |
| C      | 1.493906  | 3.627899  | 0.389673  | C      | -1.297067 | -0.498059 | 0.658985  | H      | -2.122275 | -3.583738 | -1.499162 |
| H      | 2.349079  | 3.773614  | 1.048057  | O      | 1.474796  | 2.848918  | 0.168794  | H      | -5.284985 | -0.928653 | -0.275078 |
| H      | 1.784973  | 3.757459  | -0.655147 | C      | -2.407484 | 0.195324  | 1.135066  | H      | -4.514505 | -2.975796 | -1.443029 |
| H      | 0.700002  | 4.339431  | 0.626869  | C      | -1.512807 | -1.555615 | -0.233189 | O      | -0.078350 | 2.457903  | -0.937595 |
|        |           |           |           | H      | -2.268260 | 1.018856  | 1.831329  | C      | -0.199753 | 3.841722  | -1.268233 |
| 155    |           |           |           | C      | -3.697067 | -0.148543 | 0.740018  | H      | -0.082081 | 4.462673  | -0.376882 |
| GlyPro |           |           |           | C      | -2.790476 | -1.907144 | -0.640746 | H      | 0.559936  | 4.128663  | -1.999065 |
| N      | -2.525677 | -2.471992 | -0.656888 | H      | -0.656019 | -2.113474 | -0.605910 | H      | -1.198103 | 3.956882  | -1.687927 |
| C      | -1.340028 | -1.696901 | -0.358593 | H      | -4.551905 | 0.402081  | 1.128424  |        |           |           |           |
| C      | -1.745408 | -0.311571 | 0.123984  | C      | -3.892316 | -1.201515 | -0.152608 | 160    |           |           |           |
| H      | -0.708699 | -2.118899 | 0.439618  | H      | -2.958065 | -2.729137 | -1.329071 | GlyVal |           |           |           |
| H      | -0.695464 | -1.611060 | -1.246375 | O      | -5.123157 | -1.587642 | -0.577996 | N      | -4.054567 | 0.055646  | -1.128938 |
| O      | -2.868855 | -0.105355 | 0.566874  | H      | -5.786873 | -1.029842 | -0.160146 | C      | -2.618159 | 0.044771  | -0.974395 |
| H      | -3.293198 | -2.045331 | -0.141690 | O      | -0.526201 | 2.228935  | -0.646008 | C      | -2.143781 | -0.564551 | 0.348676  |
| H      | -2.421098 | -3.421173 | -0.321737 | C      | -0.878254 | 3.609625  | -0.746687 | H      | -2.172161 | -0.534501 | -1.795754 |
| N      | -0.817198 | 0.681625  | 0.061746  | H      | -0.828231 | 4.092130  | 0.232289  | H      | -2.232601 | 1.065171  | -1.086765 |
| C      | -1.171670 | 2.038400  | 0.465848  | H      | -0.201201 | 4.127864  | -1.429775 | O      | -2.933656 | -1.114092 | 1.100932  |
| C      | 0.510478  | 0.600090  | -0.514729 | H      | -1.896897 | 3.624837  | -1.131455 | H      | -4.446747 | 0.654393  | -0.407575 |
| H      | -1.005899 | 2.174916  | 1.542774  |        |           |           |           | H      | -4.394248 | -0.871324 | -0.884369 |
| H      | -2.231056 | 2.208669  | 0.265834  | 158    |           |           |           | N      | -0.814589 | -0.497900 | 0.636695  |
| C      | -0.222408 | 2.895371  | -0.361164 | GlyThr |           |           |           | H      | -0.518220 | -0.988079 | 1.471628  |
| C      | 1.045703  | 2.046265  | -0.402504 | N      | -4.290595 | -0.606651 | 0.145190  | C      | 0.233531  | 0.096706  | -0.157815 |

|        |           |           |           |        |           |           |            |        |           |           |           |
|--------|-----------|-----------|-----------|--------|-----------|-----------|------------|--------|-----------|-----------|-----------|
| H      | -0.015406 | 0.031790  | -1.222336 | H      | -3.749972 | -2.529651 | 1.563126   | H      | -4.026705 | -3.566775 | 0.070782  |
| C      | 0.473907  | 1.592736  | 0.192307  | N      | -0.439128 | -1.359679 | -0.062200  | H      | -4.402542 | -2.447620 | 1.173601  |
| C      | 1.485070  | -0.736978 | 0.069134  | H      | -0.466085 | -1.401247 | -1.069569  | N      | -1.031305 | -1.475805 | -0.458220 |
| H      | -0.520384 | 2.051874  | 0.103332  | C      | 0.691524  | -0.728310 | 0.572052   | H      | -1.130372 | -1.254925 | -1.437405 |
| C      | 0.941880  | 1.778306  | 1.632021  | H      | 0.961912  | -1.300872 | 1.465448   | C      | 0.225489  | -1.172080 | 0.183934  |
| C      | 1.400549  | 2.285055  | -0.802211 | C      | 1.867225  | -0.682062 | -0.405874  | H      | 0.455386  | -1.962337 | 0.905385  |
| O      | 1.700224  | -1.374683 | 1.073841  | C      | 0.313595  | 0.676627  | 1.040213   | C      | 1.333529  | -1.075635 | -0.869583 |
| H      | 1.943462  | 1.363055  | 1.788306  | H      | 2.037615  | -1.694850 | -0.784750  | C      | 0.112207  | 0.135843  | 0.964681  |
| H      | 0.981002  | 2.842541  | 1.882652  | H      | 1.592333  | -0.066633 | -1.271360  | H      | 1.283708  | -1.989779 | -1.476276 |
| H      | 0.262712  | 1.292553  | 2.338278  | C      | 3.158637  | -0.161167 | 0.204810   | H      | 1.105181  | -0.233988 | -1.538225 |
| H      | 1.054797  | 2.158302  | -1.833559 | O      | -0.430739 | 1.425720  | 0.446729   | C      | 2.736484  | -0.909675 | -0.298516 |
| H      | 1.442196  | 3.358048  | -0.591954 | H      | 3.086191  | 0.888084  | 0.507927   | O      | -0.528542 | 1.098434  | 0.601186  |
| H      | 2.420163  | 1.893178  | -0.745152 | H      | 3.411658  | -0.711393 | 1.119981   | H      | 2.814110  | 0.015481  | 0.279804  |
| O      | 2.329689  | -0.659826 | -0.963002 | C      | 4.318137  | -0.302470 | -0.750168  | H      | 2.957520  | -1.741383 | 0.384126  |
| C      | 3.550886  | -1.386526 | -0.800170 | O      | 4.288466  | -0.897483 | -1.801630  | C      | 3.789226  | -0.854492 | -1.403816 |
| H      | 4.116023  | -1.222107 | -1.716518 | O      | 0.957734  | 1.002200  | -0.159553  | H      | 3.762498  | -1.770429 | -2.007254 |
| H      | 4.105039  | -1.017417 | 0.065898  | C      | 0.674856  | 2.305956  | 2.672902   | H      | 3.572690  | -0.012106 | -2.067241 |
| H      | 3.345113  | -2.449998 | -0.659864 | H      | 1.289690  | 2.411764  | 3.565435   | N      | 5.145123  | -0.677656 | -0.928468 |
| 161    |           |           |           | H      | 0.927461  | 3.073426  | 1.937429   | H      | 5.520088  | -1.451217 | -0.397610 |
| GlnAsp |           |           |           | H      | -0.384322 | 2.387563  | 2.926594   | C      | 5.537818  | 0.562046  | -0.459646 |
| N      | -2.712399 | -3.240730 | -0.544284 | O      | 5.408427  | 0.315365  | -0.273782  | N      | 4.747908  | 1.568521  | -0.527937 |
| C      | -2.320585 | -1.849394 | -0.674248 | C      | 6.567674  | 0.212620  | -1.100474  | N      | 6.823753  | 0.527993  | 0.076829  |
| H      | -2.382600 | -1.571321 | -1.736120 | H      | 7.351769  | 0.762683  | -0.581348  | H      | 5.229569  | 2.424927  | -0.264512 |
| C      | -3.303874 | -0.975054 | 0.116849  | H      | 6.856251  | -0.833122 | -1.231831  | H      | 7.474181  | -0.047086 | -0.441002 |
| C      | -0.890058 | -1.613831 | -0.175623 | H      | 6.379196  | 0.649806  | -2.083949  | H      | 7.206275  | 1.437812  | 0.284950  |
| H      | -4.314941 | -1.295488 | -0.146486 | 163    |           |           |            | O      | 0.851769  | 0.109339  | 2.069555  |
| H      | -3.183393 | -1.184449 | 1.186687  | GlnAla |           |           |            | C      | 0.846902  | 1.313452  | 2.838817  |
| C      | -3.169517 | 0.518884  | -0.136232 | N      | 2.118247  | -2.930966 | -0.886863  | H      | 1.498483  | 1.121860  | 3.690083  |
| H      | -2.195782 | 0.906458  | 0.185007  | C      | 1.582215  | -1.901439 | -0.013909  | H      | 1.226156  | 2.244980  | 2.244980  |
| H      | -3.238224 | 0.726177  | -1.214924 | H      | 1.725555  | -2.219956 | 1.028200   | H      | -0.166621 | 1.541364  | 3.176305  |
| C      | -4.275150 | 1.316732  | 0.539262  | C      | 2.347692  | -0.590624 | -0.248326  | 165    |           |           |           |
| O      | -5.310457 | 0.814817  | 0.938515  | C      | 0.096918  | -1.647813 | -0.287230  | GlnAsn |           |           |           |
| N      | -4.018638 | 2.648742  | 0.652055  | H      | 3.413916  | -0.828566 | -0.290165  | N      | -2.126421 | -2.828193 | -1.399476 |
| H      | -4.746537 | 3.240737  | 1.016559  | H      | 2.062376  | -0.212592 | -1.238584  | C      | -1.994082 | -1.419037 | -1.069242 |
| H      | -3.188994 | 3.069311  | 0.270896  | C      | 2.090966  | 0.483344  | 0.812929   | H      | -1.947266 | -0.839923 | -2.003839 |
| O      | -0.400744 | -2.292721 | 0.717994  | H      | 1.021332  | 0.566201  | 1.026458   | C      | -3.136675 | -0.866092 | -0.204966 |
| H      | -2.127079 | -3.809123 | -1.150029 | H      | 2.616362  | 0.252687  | 1.738372   | C      | -0.676884 | -1.275570 | -0.312410 |
| H      | -2.468531 | -3.533062 | 0.400313  | C      | 2.616711  | 1.829453  | 0.344979   | H      | -4.089128 | -1.035826 | -0.719526 |
| N      | -0.199250 | -0.603171 | -0.767711 | O      | 3.805177  | 2.104478  | 0.333599   | H      | -3.165412 | -1.441451 | 0.728080  |
| H      | -0.662249 | 0.032241  | -1.402978 | N      | 1.649850  | 2.678795  | -0.089496  | C      | -3.032901 | 0.621964  | 0.104836  |
| C      | 1.062422  | -0.157829 | -0.233924 | H      | 1.940785  | 3.554228  | -0.492277  | H      | -2.198470 | 0.831041  | 0.784378  |
| H      | 1.054632  | -0.291145 | 0.855666  | H      | 0.679612  | 2.403574  | -0.128035  | H      | -2.830842 | 1.183858  | -0.818674 |
| C      | 2.237466  | -0.983326 | -0.786939 | O      | -0.352183 | -1.666530 | -1.425014  | C      | -4.339483 | 1.165312  | 0.663804  |
| C      | 1.186971  | 1.324368  | -0.536731 | H      | 1.665119  | -3.816887 | -0.680591  | O      | -5.427960 | 0.751190  | 0.302731  |
| H      | 1.980354  | -2.031464 | -0.598242 | H      | 1.827735  | -2.698679 | -1.834961  | N      | -4.208412 | 2.172228  | 1.566862  |
| H      | 2.350068  | -0.841549 | -1.863801 | N      | -0.702330 | -1.387975 | 0.787442   | H      | -5.046671 | 2.567618  | 1.960042  |
| C      | 3.572414  | -0.713462 | -0.137365 | H      | -0.271663 | -1.220022 | 1.683789   | H      | -3.314977 | 2.473028  | 1.913707  |
| O      | 0.324357  | 1.985530  | -1.073797 | C      | -2.045555 | -0.916257 | 0.575889   | O      | -0.422399 | -2.000547 | 0.643903  |
| O      | 4.609648  | -0.540798 | -0.729838 | H      | -2.518635 | -1.566034 | -0.166410  | H      | -3.086277 | -3.028478 | -1.662209 |
| O      | 2.361807  | 1.808177  | -0.143049 | C      | -2.844384 | -0.937759 | 1.875407   | H      | -1.927451 | -3.356723 | -0.553306 |
| C      | 2.584673  | 3.193283  | -0.419353 | C      | -2.044735 | 0.491114  | -0.018724  | N      | 0.160419  | -0.307169 | -0.743952 |
| H      | 3.598760  | 3.399925  | -0.081415 | H      | -2.392881 | -0.277870 | 2.624242   | H      | -0.100360 | 0.306030  | -1.504275 |
| H      | 2.488674  | 3.388647  | -1.489423 | H      | -3.867928 | -0.601770 | 1.697535   | C      | 1.387422  | 0.031239  | -0.063410 |
| H      | 1.864245  | 3.809974  | 0.122802  | H      | -2.874792 | -1.953283 | 2.278019   | H      | 1.199894  | 0.256952  | 0.997233  |
| O      | 3.471859  | -0.735663 | 1.201024  | O      | -1.136962 | 1.288252  | 0.062421   | C      | 2.416352  | -1.103707 | -0.066267 |
| C      | 4.691816  | -0.500195 | 1.899257  | O      | -3.210753 | 0.751045  | -0.608925  | C      | 1.904360  | 1.298411  | -0.720138 |
| H      | 5.083021  | 0.492603  | 1.662496  | C      | -3.333846 | 2.054677  | -1.180840  | H      | 1.857369  | -2.028012 | 0.119050  |
| H      | 4.447139  | -0.571804 | 2.958524  | H      | -4.337366 | 2.099535  | -0.1601482 | H      | 2.916705  | -1.194382 | -1.736163 |
| H      | 5.442226  | -1.246356 | 1.627538  | H      | -3.202923 | 2.823929  | -0.416082  | C      | 3.411040  | -0.954026 | 1.073330  |
| 162    |           |           |           | H      | -2.585107 | 2.197390  | -1.963298  | O      | 1.276710  | 1.942928  | -1.533094 |
| GlnGlu |           |           |           | 164    |           |           |            | O      | 3.149401  | -0.349291 | 2.098460  |
| N      | -3.630638 | -2.918035 | 0.629347  | GlnArg |           |           |            | N      | 4.604009  | -1.574297 | 0.875249  |
| C      | -2.836754 | -1.968569 | -0.130571 | N      | -4.406848 | -2.629685 | 0.171480   | H      | 5.239082  | -1.620743 | 1.655412  |
| H      | -2.545323 | -2.439400 | -1.079891 | C      | -3.497390 | -1.673808 | -0.436288  | H      | 4.767518  | -2.171301 | 0.083300  |
| C      | -3.683204 | -0.721655 | -0.424644 | H      | -3.344939 | -1.957410 | -1.487190  | O      | 3.125976  | 1.615444  | -0.302628 |
| C      | -1.592927 | -1.524518 | 0.641912  | C      | -4.124200 | -0.272996 | -0.378296  | C      | 3.670976  | 2.812020  | -0.860997 |
| H      | -4.663125 | -1.054992 | -0.776443 | C      | -2.154452 | -1.625985 | 0.297165   | H      | 4.657804  | 2.920777  | -0.413723 |
| H      | -3.842427 | -0.199812 | 0.527816  | H      | -5.165720 | -0.356831 | -0.699891  | H      | 3.745728  | 2.728964  | -1.947806 |
| C      | -3.054916 | 0.235284  | -1.442851 | H      | -4.135954 | 0.039597  | 0.673940   | H      | 3.041020  | 3.669725  | -0.614665 |
| H      | -1.991364 | 0.381035  | -1.231010 | C      | -3.395359 | 0.776021  | -1.223482  | 166    |           |           |           |
| H      | -3.157553 | -0.174259 | -2.452969 | H      | -2.313566 | 0.706293  | -1.076909  | GlnCys |           |           |           |
| C      | -3.762436 | 1.579333  | -1.416766 | H      | -3.617209 | 0.619956  | -2.284335  | N      | 2.325789  | -3.192532 | 0.556675  |
| O      | -4.858995 | 1.756379  | -1.921212 | C      | -3.863420 | 2.173973  | -0.856456  | H      | 1.874555  | -1.817709 | 0.667646  |
| N      | -3.081930 | 2.548167  | -0.751204 | O      | -4.945477 | 2.618484  | -1.203919  | C      | 1.846303  | -1.547617 | 1.732925  |
| H      | -3.533409 | 3.439609  | -0.629953 | N      | -2.987285 | 2.862335  | -0.080709  | C      | 2.881207  | -0.900210 | -0.041222 |
| H      | -2.200535 | 2.362917  | -0.295439 | H      | -3.270476 | 3.766697  | 0.258523   | C      | 0.477200  | -1.629193 | 0.065567  |
| O      | -1.635759 | -1.301676 | 1.845175  | H      | -2.120862 | 2.452215  | 0.236575   | H      | 3.880929  | -1.188993 | 0.292591  |
| H      | -3.099634 | -3.774295 | 0.761243  | O      | -2.094162 | -1.697824 | 1.517789   | H      | 2.846488  | -1.100619 | -1.119062 |





|        |           |           |           |        |           |           |           |        |           |           |           |
|--------|-----------|-----------|-----------|--------|-----------|-----------|-----------|--------|-----------|-----------|-----------|
| C      | 3.047379  | 0.907106  | -0.968231 | H      | -0.743160 | 1.385748  | 0.384331  | H      | -4.565548 | -0.325102 | 2.093016  |
| C      | 3.615747  | -1.392477 | -0.615197 | C      | -1.006804 | 0.199396  | -1.423627 | H      | -4.241525 | -1.841732 | 1.261787  |
| H      | 2.328192  | 1.672081  | -1.251846 | C      | 0.130617  | -0.532580 | 0.681048  | H      | -2.337155 | 1.410600  | 0.848470  |
| C      | 4.333507  | 1.287465  | -0.598380 | H      | -1.164608 | 1.073413  | -2.068878 | H      | -3.078995 | 1.817539  | -0.690499 |
| C      | 4.901467  | -1.030405 | -0.243732 | H      | -0.399262 | -0.517226 | -1.990563 | C      | -4.316397 | 2.246080  | 1.004650  |
| H      | 3.345628  | -2.446044 | -0.624001 | C      | -2.314165 | -0.424289 | -1.065253 | H      | -4.496561 | 1.912652  | 2.030915  |
| H      | 4.612295  | 2.339343  | -0.601191 | O      | 0.966452  | -1.374679 | 0.422756  | H      | -3.982347 | 3.286904  | 1.053633  |
| C      | 5.266870  | 0.317407  | -0.233604 | C      | -2.618813 | -1.759273 | -1.112489 | H      | -5.276212 | 2.228996  | -0.866674 |
| H      | 5.639512  | -1.774662 | 0.036545  | C      | -3.817739 | 1.583710  | -0.328739 | O      | -1.030974 | -1.932473 | 0.291412  |
| O      | 6.537204  | 0.617682  | 0.133206  | C      | -3.492901 | 0.243591  | -0.584217 | H      | -2.978543 | -2.505204 | -2.044446 |
| H      | 6.661998  | 1.571059  | 0.087740  | H      | -2.002267 | -2.591337 | -1.425008 | H      | -3.064947 | -2.777442 | -0.456698 |
| O      | 1.043365  | 0.105878  | 1.760377  | N      | -3.909663 | -1.960972 | -0.689967 | N      | -0.521672 | 0.022567  | -0.716216 |
| C      | 1.076801  | 1.271996  | 2.582833  | C      | -4.474972 | -0.753149 | -0.362640 | H      | -0.832930 | 0.852189  | -1.203956 |
| H      | 1.441601  | 2.130187  | 2.013262  | C      | -5.086706 | 1.890744  | 0.132181  | C      | 0.817325  | 0.069307  | -0.186282 |
| H      | 0.078872  | 1.492146  | 2.968466  | H      | -3.086724 | 2.371403  | -0.491227 | C      | 0.803350  | -0.156093 | 0.887189  |
| H      | 1.758627  | 1.037504  | 3.398798  | H      | -4.377645 | -2.849709 | -0.660727 | H      | 1.732872  | -0.296130 | -0.864816 |
| 178    |           |           |           | C      | -5.755419 | -0.448939 | 0.101810  | C      | 1.325523  | 1.485339  | -0.385878 |
| GlnThr |           |           |           | C      | -6.044937 | 0.883838  | 0.346061  | H      | 1.221858  | -1.930912 | -0.756056 |
| N      | 2.155348  | -3.054591 | -0.785949 | H      | -5.349952 | 2.924673  | 0.333845  | H      | 1.852629  | -0.747982 | -1.927626 |
| C      | 1.777736  | -1.813697 | -0.139474 | H      | -6.497747 | -1.224926 | 0.265815  | C      | 3.105618  | -1.094686 | -0.253887 |
| H      | 1.649748  | -1.904569 | 0.957335  | H      | -7.031582 | 1.156103  | 0.708734  | O      | 0.709901  | 2.354344  | -0.962006 |
| C      | 2.877191  | -0.756840 | -0.409626 | O      | -0.669822 | -0.576039 | 1.736767  | O      | 4.143979  | -1.084088 | -0.869630 |
| C      | 0.425349  | -1.379570 | -0.720177 | C      | -0.482067 | -1.692811 | 2.604616  | O      | 2.539632  | 1.646277  | 0.135724  |
| H      | 3.770127  | -1.316185 | -0.706905 | H      | -0.640650 | -2.629032 | 2.063814  | C      | 3.124973  | 2.936200  | -0.060640 |
| H      | 2.608561  | -0.169169 | -1.292928 | H      | 0.528569  | -1.684033 | 3.019248  | H      | 4.109698  | 2.884852  | 0.401016  |
| C      | 3.239036  | 0.158685  | 0.774743  | H      | -1.220353 | -1.578136 | 3.396803  | H      | 3.211945  | 3.156706  | -1.126662 |
| H      | 2.576451  | -0.030337 | 1.631486  | 180    |           |           |           | H      | 2.514742  | 3.707226  | 0.414911  |
| H      | 4.249202  | -0.052615 | 1.321192  | GlnVal |           |           |           | O      | 3.029535  | -1.263866 | 1.075983  |
| C      | 3.237237  | 1.664382  | 0.537405  | N      | 2.293134  | -3.270019 | 0.017775  | C      | 4.285410  | -1.389290 | 1.737350  |
| O      | 4.115230  | 2.373372  | 1.004062  | C      | 1.772548  | -1.956110 | 0.349105  | H      | 4.884510  | -0.486116 | 1.595551  |
| N      | 2.222643  | 2.160455  | -0.216585 | H      | 1.669815  | -1.890430 | 1.441790  | H      | 4.053526  | -1.532152 | 2.792338  |
| H      | 2.170760  | 3.167040  | -0.243403 | C      | 2.774524  | -0.887153 | -0.111203 | H      | 4.843397  | -2.244309 | 1.348199  |
| H      | 1.340831  | 1.677025  | -0.321383 | C      | 0.404850  | -1.707586 | -0.300074 | 182    |           |           |           |
| O      | 0.136915  | -1.497475 | -1.897458 | H      | 3.766768  | -1.195876 | 0.227388  | IleGlu |           |           |           |
| H      | 3.046058  | -3.370367 | -0.418057 | H      | 2.809483  | -0.882873 | -1.207561 | N      | -2.727056 | -2.927899 | -0.871041 |
| H      | 1.474525  | -3.785544 | -0.611679 | C      | 2.480892  | 0.513600  | 0.403880  | C      | -2.630925 | -1.477909 | -0.798454 |
| N      | -0.453247 | -0.863298 | 0.192163  | H      | 1.523064  | 0.897595  | 0.036110  | H      | -2.616135 | -1.082331 | -1.823087 |
| H      | -0.184367 | -0.720628 | 1.153820  | H      | 2.400765  | 0.499490  | 1.501549  | C      | -3.890610 | -0.899629 | -0.107860 |
| C      | -1.762236 | -0.424494 | -0.199261 | C      | 3.582382  | 1.503166  | 0.058114  | C      | -1.343218 | -1.050216 | -0.085242 |
| H      | -1.958932 | -0.867434 | -1.183399 | O      | 4.715511  | 1.167181  | -0.236506 | H      | -4.721866 | -1.295995 | -0.707543 |
| C      | -2.811367 | -0.899473 | 0.809748  | N      | 3.198536  | 2.807516  | 0.122124  | C      | -4.053245 | -1.423527 | 1.317057  |
| C      | -1.816076 | 1.088371  | -0.385001 | H      | 3.898433  | 3.516389  | -0.021284 | C      | -3.941145 | 0.630599  | -0.182780 |
| H      | -3.777053 | -0.472548 | 0.509670  | H      | 2.271470  | 3.077985  | 0.401937  | H      | -3.224963 | -1.107883 | 1.959825  |
| C      | -2.915047 | -2.413941 | 0.873147  | O      | 0.099251  | -2.231292 | -1.363141 | H      | -4.986662 | -1.065543 | 1.760407  |
| O      | -2.390536 | -0.353143 | 2.053255  | H      | 1.683734  | -3.977949 | 0.418149  | H      | -4.091075 | -2.516263 | 1.326360  |
| O      | -0.869928 | 1.828994  | -0.327381 | H      | 2.191662  | -3.383330 | -0.989370 | H      | -3.167725 | 1.061478  | 0.466537  |
| H      | -1.969361 | -2.845105 | 1.210987  | N      | -0.434626 | -0.866128 | 0.365081  | H      | -3.689864 | 0.945675  | -1.206084 |
| H      | -3.700750 | -2.713495 | 1.574363  | H      | -0.078999 | -0.324301 | 1.140181  | C      | -5.296671 | 1.225301  | 0.182211  |
| H      | -3.160790 | -2.835292 | -0.106417 | C      | -1.640317 | -0.371124 | -0.256464 | H      | -5.561177 | 1.031405  | 1.225854  |
| H      | -3.116268 | -0.421672 | 2.680219  | H      | -1.549949 | -0.556829 | -1.333764 | H      | -5.298253 | 2.310468  | 0.041679  |
| O      | -3.060708 | 1.485463  | -0.663351 | C      | -2.897304 | -1.124451 | 0.251011  | H      | -6.091801 | 0.807264  | -0.444918 |
| C      | -3.252327 | 2.878275  | -0.922643 | C      | -1.687578 | 1.128443  | -0.022653 | O      | -0.865045 | -1.718284 | 0.826942  |
| H      | -4.019158 | 2.948281  | -1.694499 | H      | -2.603330 | -2.178770 | 0.171291  | H      | -2.065070 | -3.268543 | -1.562217 |
| H      | -3.597445 | 3.370761  | -0.009940 | C      | -3.191771 | -0.817788 | 1.715708  | H      | -2.386525 | -3.290462 | 0.017870  |
| H      | -2.320109 | 3.335995  | -1.255058 | C      | -4.122885 | -0.917139 | -0.632856 | N      | -0.759697 | 0.094834  | -0.514822 |
| 179    |           |           |           | O      | -0.947211 | 1.726560  | 0.730521  | H      | -1.190085 | 0.678644  | -1.219316 |
| GlnTrp |           |           |           | H      | -3.510165 | 0.222970  | 1.850604  | C      | 0.397135  | 0.645676  | 0.148313  |
| N      | 3.930907  | 3.194596  | 0.349811  | H      | -3.998697 | -1.456344 | 0.807541  | H      | 0.284306  | 0.517629  | 1.232164  |
| C      | 3.368998  | 2.044174  | -0.336009 | H      | -2.314615 | -0.989739 | 2.347298  | C      | 1.684355  | -0.080723 | -0.291967 |
| C      | 3.303246  | 2.275453  | -1.408490 | H      | -3.899875 | -1.140227 | -1.681146 | C      | 0.422558  | 2.125842  | -0.178801 |
| C      | 4.294779  | 0.835508  | -0.134787 | H      | -4.929118 | -1.584873 | -0.313265 | H      | 1.462100  | -1.148578 | -0.209343 |
| C      | 1.988464  | 1.674856  | 0.211832  | H      | -4.494291 | 0.109593  | -0.579858 | H      | 1.879015  | 0.141560  | -1.347762 |
| H      | 5.320170  | 1.158127  | -0.333634 | O      | -2.642331 | 1.722767  | -0.739335 | C      | 2.918239  | 0.237644  | 0.556851  |
| H      | 4.244084  | 0.558404  | 0.926169  | C      | -2.753553 | 3.135926  | -0.555862 | O      | -0.218475 | 2.624376  | -1.049385 |
| C      | 3.943707  | -0.375982 | -1.004532 | H      | -3.578064 | 3.451583  | -1.193497 | H      | 3.165724  | 1.298924  | 0.510958  |
| H      | 2.864005  | -0.552703 | -1.003516 | H      | -2.962368 | 3.372704  | 0.489871  | H      | 2.725778  | -0.037325 | 1.598805  |
| H      | 4.268889  | -0.202240 | -2.035542 | H      | -1.827511 | 3.633229  | -0.853378 | C      | 4.110486  | -0.530356 | 0.046857  |
| C      | 4.656816  | -1.618358 | -0.498931 | 181    |           |           |           | O      | 4.931877  | -0.106135 | -0.730695 |
| O      | 5.848307  | -1.812275 | -0.676847 | IleAsp |           |           |           | O      | 1.252858  | 2.803457  | 0.608715  |
| N      | 3.857359  | -2.468188 | 0.195815  | N      | -3.389600 | -2.146581 | -1.187556 | C      | 1.353485  | 4.202232  | 0.323208  |
| H      | 4.287976  | -3.270011 | 0.625830  | C      | -2.820567 | -0.839152 | -0.899098 | H      | 2.069807  | 4.597866  | 1.041709  |
| H      | 2.885915  | -2.258820 | 0.376590  | H      | -2.811665 | -0.254009 | -1.828568 | H      | 1.705084  | 4.359854  | -0.698689 |
| O      | 1.750880  | 1.709558  | 1.12238   | C      | -3.723539 | -0.080846 | 0.105413  | H      | 0.381037  | 4.684822  | 0.442493  |
| H      | 3.359552  | 4.013384  | 0.160683  | C      | -1.383035 | -0.969683 | -0.383805 | O      | 4.130478  | -1.781895 | 0.535849  |
| H      | 3.831455  | 3.023751  | 1.348879  | H      | -4.708932 | -0.077895 | -0.380945 | C      | 5.199690  | -2.595354 | 0.058616  |
| N      | 1.045862  | 1.269620  | -0.682654 | H      | -3.859696 | -0.830766 | 1.428253  | H      | 5.075076  | -3.564210 | 0.541350  |
| H      | 1.320121  | 1.110569  | -1.640198 | C      | -3.285039 | 1.375662  | 0.295358  | H      | 5.150871  | -2.699628 | -1.028289 |
| C      | -0.178494 | 0.664435  | -0.213543 | H      | -2.898667 | -0.912387 | 1.946577  | H      | 6.165333  | -2.157007 | 0.322816  |



|        |           |           |           |        |           |           |           |        |           |           |           |
|--------|-----------|-----------|-----------|--------|-----------|-----------|-----------|--------|-----------|-----------|-----------|
| N      | -0.513410 | -0.459864 | 0.241141  | N      | 0.152798  | -0.156053 | 0.474314  | H      | -2.801101 | -0.461142 | 2.006201  |
| H      | -0.584062 | 0.215760  | 0.989182  | H      | 0.384627  | 0.525958  | 1.183864  | H      | -4.492218 | 0.059873  | 1.886510  |
| C      | -1.707352 | -0.702027 | -0.515704 | C      | -1.106959 | 0.038016  | -0.205624 | H      | -4.055642 | -1.598063 | 1.488554  |
| C      | -2.837740 | 0.093257  | 0.086611  | H      | -0.936657 | -0.104815 | -1.288115 | H      | -2.213389 | 1.531547  | 0.394258  |
| H      | -1.590973 | -0.418723 | -1.570004 | C      | -2.136138 | -1.065294 | 0.162356  | H      | -2.853581 | 1.509308  | -1.240562 |
| H      | -1.969078 | -1.767309 | -0.519690 | C      | -1.576680 | 1.434953  | 0.150849  | C      | -4.220343 | 2.292653  | 0.211205  |
| O      | -2.722345 | 0.829588  | 1.040294  | H      | -1.565538 | -1.992985 | 0.025285  | H      | -4.462354 | 2.220326  | 1.275651  |
| O      | -3.978603 | -0.116611 | -0.570321 | H      | -2.565127 | -0.961760 | 1.622580  | H      | -3.919563 | 3.326301  | 0.014767  |
| C      | -5.106977 | 0.603772  | -0.070204 | C      | -3.317010 | -1.110294 | -0.811334 | H      | -5.140255 | 2.101009  | -0.352229 |
| H      | -4.928262 | 1.680212  | -0.122785 | O      | -1.117967 | 2.093568  | 1.058992  | O      | -0.810133 | -1.836275 | 0.791859  |
| H      | -5.942958 | 0.322497  | -0.709017 | H      | -3.210059 | -0.090403 | 1.790113  | H      | -2.550249 | -2.992552 | -1.481695 |
| H      | -5.307268 | 0.329052  | 0.967983  | H      | -3.122541 | -1.848811 | 1.934724  | H      | -2.747659 | -2.888065 | 0.114512  |
| 189    |           |           |           | H      | -1.696647 | -0.869605 | 2.281855  | N      | -0.252093 | -0.132299 | -0.582238 |
| IleGln |           |           |           | H      | -3.938602 | -0.216424 | -0.684748 | H      | -0.523931 | 0.530596  | -1.294932 |
| N      | -2.919894 | -2.724923 | -0.786541 | H      | -2.926265 | -1.066473 | -1.836158 | C      | 1.057910  | 0.052988  | -0.000178 |
| C      | -2.601211 | -1.305354 | -0.753380 | C      | -4.175883 | -2.361283 | -0.662413 | H      | 0.979379  | -0.084180 | 1.083106  |
| H      | -2.530109 | -0.942762 | -1.787704 | H      | -4.667817 | -2.407164 | 0.314218  | C      | 2.057710  | -0.976566 | -0.566405 |
| C      | -3.752843 | -0.521616 | -0.077139 | H      | -4.961439 | -2.387279 | -1.423651 | C      | 1.471870  | 1.478807  | -0.298701 |
| C      | -1.259198 | -1.063725 | -0.053026 | H      | -3.574192 | -3.269859 | -0.775613 | H      | 1.585718  | -1.953145 | -0.403146 |
| H      | -4.639328 | -0.804018 | -0.662129 | O      | -2.562445 | 1.855588  | -0.643811 | H      | 2.116464  | -0.825953 | -1.652150 |
| C      | -3.982357 | -0.974748 | 1.362643  | C      | -3.072095 | 3.156197  | -0.340694 | C      | 3.466877  | -1.000165 | 0.032965  |
| C      | -3.571293 | 0.995797  | -0.197456 | H      | -3.858331 | 3.341745  | -1.071174 | O      | 0.997157  | 2.151078  | -1.187776 |
| H      | -3.111809 | -0.768129 | 1.993830  | H      | -3.475088 | 3.184354  | 0.674313  | H      | 3.950672  | -0.034542 | -0.166156 |
| H      | -4.849053 | -0.470014 | 1.798623  | H      | -2.281851 | 3.905366  | -0.427092 | C      | 3.451387  | -1.216753 | 1.544865  |
| H      | -4.181218 | -2.049237 | 1.402115  | 191    |           |           |           | C      | 4.286657  | -2.659682 | -0.659682 |
| H      | -2.737217 | 1.323796  | 0.436595  | IleHis |           |           |           | H      | 2.892390  | -2.123411 | 1.804704  |
| H      | -3.281190 | 1.238431  | -1.230136 | N      | -3.204996 | -2.557048 | -0.828485 | H      | 4.470441  | -1.331099 | 1.928832  |
| C      | -4.819169 | 1.798529  | 0.153038  | C      | -2.890026 | -1.144747 | -0.737656 | H      | 2.996404  | -0.374398 | 2.073608  |
| H      | -5.104738 | 1.672554  | 1.201693  | H      | -2.812013 | -0.733408 | -1.756161 | H      | 4.322272  | -1.936958 | -1.743980 |
| H      | -4.657089 | 2.867588  | -0.014992 | C      | -3.942948 | -0.278913 | 0.011278  | H      | 5.316311  | -2.100506 | -0.288012 |
| H      | -5.671698 | 1.490256  | -0.462172 | C      | -1.519435 | -1.051838 | -0.071677 | H      | 3.854462  | -3.078336 | -0.474799 |
| O      | -0.882842 | -1.780841 | 0.870234  | H      | -4.884976 | -0.465674 | -0.530714 | O      | 2.434890  | 1.904871  | 0.521846  |
| H      | -2.334493 | -3.177794 | -1.482385 | C      | -4.139402 | -0.719690 | 1.458766  | C      | 2.906285  | 3.230276  | 0.267536  |
| H      | -2.615333 | -3.114341 | 0.104214  | C      | -3.643843 | 1.218718  | -0.114050 | H      | 3.675500  | 3.417874  | 1.015345  |
| N      | -0.512930 | -0.027563 | -0.503200 | H      | -3.248103 | -0.518558 | 2.060934  | H      | 3.322865  | 3.303109  | -0.739736 |
| H      | -0.851556 | 0.600090  | -1.219396 | H      | -4.988197 | -0.203589 | 1.915901  | H      | 2.090649  | 3.950217  | 0.365046  |
| C      | 0.723222  | 0.343434  | 0.142662  | H      | -4.337584 | -1.793805 | 1.519014  | 193    |           |           |           |
| H      | 0.600328  | 0.226944  | 1.226678  | H      | -2.751690 | 1.463262  | 0.477099  | IleLys |           |           |           |
| C      | 1.888813  | -0.553069 | -0.321398 | H      | -3.386119 | 1.441671  | -1.159480 | N      | -2.979998 | -2.839416 | -0.816986 |
| C      | 0.961008  | 1.806118  | -0.178915 | C      | -4.796252 | 2.123227  | 0.307375  | C      | -2.747136 | -1.404026 | -0.757229 |
| H      | 1.493346  | -1.572817 | -0.333778 | H      | -5.035016 | 2.011415  | 1.369172  | H      | -2.724848 | -1.015278 | -1.784393 |
| H      | 2.175688  | -0.305853 | -1.348309 | H      | -4.550451 | 3.175851  | 0.137213  | C      | -3.926799 | -0.708187 | -0.035322 |
| C      | 3.120466  | -0.507055 | 0.571332  | H      | -5.704387 | 1.898548  | -0.263256 | C      | -1.405207 | -1.096278 | -0.082460 |
| O      | 0.368947  | 2.416265  | -1.040901 | O      | -1.212804 | -1.775252 | 0.869416  | H      | -4.808759 | -1.022532 | 0.610880  |
| H      | 3.447738  | 0.528525  | -0.271530 | H      | -4.205722 | -2.692142 | -0.924275 | C      | -4.099643 | -1.214452 | 1.394769  |
| H      | 2.889060  | -0.909718 | 1.565028  | H      | -2.905273 | -3.003067 | 0.034282  | C      | -3.832119 | 0.819887  | -0.112773 |
| C      | 4.283047  | -1.253776 | -0.062746 | N      | -0.677591 | -0.110675 | -0.561189 | H      | -3.227092 | -0.980105 | 2.013086  |
| O      | 4.450872  | -1.303522 | -1.269470 | H      | -0.904517 | 0.418793  | -1.390957 | H      | -4.982017 | -0.769624 | 1.863408  |
| N      | 5.150975  | -1.823516 | 0.815000  | C      | 0.645437  | 0.083851  | -0.014501 | H      | -4.241292 | -2.298673 | 1.060772  |
| H      | 5.936080  | -2.330357 | 0.440253  | H      | 0.592494  | 0.006010  | 1.074589  | H      | -3.004076 | 1.174083  | 0.515160  |
| H      | 4.972600  | -1.858807 | 1.802962  | C      | 1.612588  | -0.986699 | -0.558878 | H      | -3.576966 | 1.108929  | -1.142764 |
| O      | 1.915391  | 2.343127  | 0.586469  | C      | 1.084453  | 1.477198  | -0.425058 | C      | -5.114811 | 1.541281  | 0.285729  |
| C      | 2.223417  | 3.709903  | 0.297147  | H      | 1.154184  | -1.952176 | -0.311797 | H      | -5.371500 | 1.369168  | 1.335172  |
| H      | 3.009617  | 3.899082  | 0.997232  | H      | 1.616091  | -0.899608 | -1.652947 | H      | -5.015393 | 2.622238  | 0.147302  |
| H      | 2.570052  | 3.814288  | -0.733331 | C      | 3.006747  | -0.908918 | -0.031971 | H      | -5.961669 | 1.204412  | -0.322349 |
| H      | 1.340917  | 4.337457  | 0.439416  | O      | 0.824434  | 1.957258  | -1.507020 | O      | -0.974799 | -1.797662 | 0.828617  |
| 190    |           |           |           | N      | 4.077301  | -1.401704 | -0.743604 | H      | -2.377031 | -3.241781 | -1.528750 |
| IleIle |           |           |           | C      | 3.561789  | -0.457122 | 1.140976  | H      | -2.641141 | -3.227613 | 0.061847  |
| N      | 2.983398  | -2.389886 | 0.792435  | H      | 4.032780  | -1.824278 | -1.656640 | N      | -0.724937 | -0.020156 | -0.543206 |
| C      | 2.430566  | -1.044510 | 0.739647  | C      | 5.193818  | -1.229274 | 0.013694  | H      | -1.101981 | 0.574966  | -1.267751 |
| H      | 2.287632  | -0.690323 | 1.769598  | N      | 4.918233  | -0.656734 | 1.159056  | C      | 0.513256  | 0.412825  | 0.062040  |
| C      | 3.442626  | -0.084519 | 0.066939  | H      | 3.054784  | 0.016604  | 1.969621  | H      | 0.439906  | 0.285990  | 1.148374  |
| C      | 1.076892  | -1.036817 | 0.020496  | H      | 6.174686  | -1.536009 | -0.323659 | C      | 1.704706  | -0.424115 | -0.445909 |
| H      | 4.352435  | -0.195741 | 0.673312  | O      | 1.782982  | 2.091428  | 0.523815  | C      | 0.663660  | 1.885366  | -0.262603 |
| C      | 3.778700  | -0.514958 | -1.358752 | C      | 2.300541  | 3.375834  | 0.167209  | H      | 1.399107  | -1.467653 | -0.313778 |
| C      | 2.994287  | 1.379065  | 0.150899  | H      | 2.850999  | 3.723115  | 1.039992  | H      | 1.815650  | -0.254476 | -1.524945 |
| H      | 2.899974  | -0.472807 | -2.010404 | H      | 2.964341  | 3.291602  | -0.695940 | C      | 3.028696  | -0.192501 | 0.272921  |
| H      | 4.555012  | 0.125272  | -1.787101 | H      | 1.485368  | 4.061322  | -0.075182 | O      | 0.089132  | 2.439407  | -1.174270 |
| H      | 4.161728  | -1.538995 | -1.372886 | 192    |           |           |           | H      | 3.363164  | 0.842346  | 0.133277  |
| H      | 2.125544  | 1.540478  | -0.500854 | IleLeu |           |           |           | H      | 2.878878  | -0.319152 | 1.353997  |
| H      | 2.649612  | 1.588084  | 1.174156  | N      | -3.032480 | -2.458630 | -0.764472 | C      | 4.114920  | -1.151209 | -0.203101 |
| C      | 4.085084  | 2.383790  | -0.202890 | C      | -2.507180 | -1.101232 | -0.754059 | H      | 3.808721  | -2.190848 | -0.036319 |
| H      | 4.401495  | 2.293561  | -1.246259 | H      | -2.427097 | -0.753748 | -1.793140 | H      | 4.248483  | -1.040148 | -1.289621 |
| H      | 3.734335  | 3.409874  | -0.056011 | C      | -3.503059 | -0.157048 | -0.036268 | C      | 5.452675  | -0.926849 | 0.487434  |
| H      | 4.970849  | 2.241690  | 0.426101  | C      | -1.116165 | -1.060659 | -0.109367 | H      | 5.323017  | -1.068154 | 1.568095  |
| O      | 0.849363  | -1.797597 | -0.915679 | H      | -4.448216 | -0.318243 | -0.573320 | N      | 6.436108  | -1.896394 | 0.025349  |
| H      | 2.466440  | -2.931930 | 1.478711  | C      | -3.720776 | -0.559407 | 1.420249  | H      | 6.647943  | -1.727516 | -0.953503 |
| H      | 2.770783  | -2.829177 | -0.101794 | C      | -3.118102 | 1.318764  | -0.190107 | H      | 7.308634  | -1.775776 | 0.528756  |

|        |           |           |           |        |           |           |           |        |           |           |           |
|--------|-----------|-----------|-----------|--------|-----------|-----------|-----------|--------|-----------|-----------|-----------|
| O      | 1.515644  | 2.499965  | 0.560424  | H      | -0.880522 | 0.299154  | 1.525304  | H      | 0.652081  | -1.244259 | -1.494579 |
| C      | 1.732644  | 3.885143  | 0.281762  | C      | -2.034239 | -0.728232 | 0.054575  | H      | 1.211011  | 0.280409  | -2.183643 |
| H      | 2.441782  | 4.229310  | 1.033349  | H      | -2.348920 | 3.723168  | 0.015416  | C      | 2.455965  | -0.524122 | -0.616905 |
| H      | 2.141927  | 4.016025  | -0.722670 | H      | -1.034857 | 3.293534  | 1.123821  | O      | -0.435931 | 2.730768  | -0.820441 |
| H      | 0.794761  | 4.440279  | 0.355081  | H      | -3.255466 | 1.476802  | 0.079533  | C      | 3.594281  | 0.183705  | -0.996597 |
| 194    |           |           |           | H      | -2.788113 | 1.686866  | 1.770117  | C      | 2.586999  | -1.493280 | 0.385398  |
| IleMet |           |           |           | O      | -1.999352 | -1.144993 | -1.078664 | H      | 3.522241  | 0.938836  | -1.775736 |
| N      | -3.029094 | -2.746056 | -0.758398 | O      | -2.716848 | -1.310659 | 1.047958  | C      | 4.828323  | -0.059646 | -0.400733 |
| C      | -2.715717 | -1.325505 | -0.732346 | C      | -3.434819 | -2.490101 | 0.679559  | C      | 3.807842  | -1.743780 | 0.992941  |
| H      | -2.684773 | -0.959456 | -1.767487 | H      | -2.749010 | -3.253623 | 0.305024  | H      | 1.709957  | -2.063177 | 0.685692  |
| C      | -3.844928 | -0.549199 | -0.010933 | H      | -3.928704 | -2.832135 | 1.588146  | H      | 5.706726  | 0.500286  | -0.716499 |
| C      | -1.350120 | -1.079020 | -0.081138 | H      | -4.170243 | -2.265676 | -0.096555 | C      | 4.938277  | -1.024380 | 0.599716  |
| H      | -4.751263 | -0.833550 | -0.563592 | 196    |           |           |           | H      | 3.909728  | -2.497481 | 1.766982  |
| C      | -4.017975 | -1.007998 | 1.435002  | IleSer |           |           |           | O      | 6.111642  | -1.310148 | 1.221406  |
| C      | -3.674844 | 0.969520  | -0.132143 | N      | -3.092487 | -2.022545 | -0.659975 | H      | 6.804450  | -0.754412 | 0.850695  |
| H      | -3.123106 | -0.804321 | 2.032126  | C      | -2.237163 | -0.846260 | -0.701133 | O      | 1.424936  | 2.255349  | 0.347306  |
| H      | -4.866505 | -0.504619 | 1.906732  | H      | -2.032054 | -0.605254 | -1.753154 | C      | 1.728114  | 3.650890  | 0.373223  |
| H      | -4.215969 | -2.082461 | 1.478855  | C      | -2.983457 | 0.368719  | -0.095939 | H      | 1.824775  | 4.042883  | -0.642018 |
| H      | -2.821278 | 1.299273  | 0.474559  | C      | -0.907081 | -1.113339 | 0.013710  | H      | 0.940600  | 4.203840  | 0.890619  |
| H      | -3.421417 | 1.217260  | -1.173303 | H      | -3.914179 | 0.417943  | -0.678217 | H      | 2.672158  | 3.735666  | 0.909454  |
| C      | -4.914158 | 1.764487  | 0.263575  | C      | -3.360269 | 0.135778  | 1.365087  | 198    |           |           |           |
| H      | -5.164285 | 1.631958  | 1.320383  | C      | -2.223057 | 1.682634  | -0.308142 | IleThr |           |           |           |
| H      | -4.762880 | 2.835147  | 0.095667  | H      | -2.473503 | 0.027557  | 1.998203  | N      | -3.090724 | -2.142533 | -0.132924 |
| H      | -5.785036 | 1.454951  | -0.324686 | H      | -3.957884 | 0.965858  | -1.752054 | C      | -2.248914 | -1.002622 | -0.465543 |
| O      | -0.935892 | -1.794962 | 0.825496  | H      | -3.962753 | -0.770746 | 1.469361  | H      | -2.056961 | -1.018973 | -1.546889 |
| H      | -2.463294 | -3.195957 | -1.472118 | H      | -1.320691 | 1.696163  | 0.317003  | C      | -3.001775 | 0.315536  | -0.158322 |
| H      | -2.697511 | -3.136698 | 0.122035  | H      | -1.872927 | 1.726608  | -1.349904 | C      | -0.907939 | -1.082232 | 0.273794  |
| N      | -0.625249 | -0.037170 | -0.556907 | C      | -3.051354 | 2.931233  | -0.026700 | H      | -3.960874 | 0.189189  | -0.679772 |
| H      | -0.994504 | 0.590516  | -1.257822 | H      | -3.350007 | 2.995216  | 1.023789  | C      | -3.300674 | 0.469244  | 1.330927  |
| C      | 0.626778  | 0.345427  | 0.049302  | H      | -2.484130 | 3.837440  | -0.260039 | C      | -2.300042 | 1.541510  | -0.753311 |
| H      | 0.550596  | 0.206178  | 1.134457  | H      | -3.963896 | 2.944692  | -0.632896 | H      | -2.383288 | 0.580728  | 1.918521  |
| C      | 1.785666  | -0.530060 | -0.473486 | O      | -0.840928 | -1.873367 | 0.974191  | H      | -3.929902 | 1.344720  | 1.513894  |
| C      | 0.829020  | 1.817255  | -0.255635 | H      | -2.732620 | -2.715427 | -1.309843 | H      | -3.841444 | -0.401513 | 1.711989  |
| H      | 1.426067  | -1.561614 | -0.409109 | H      | -2.971250 | -2.441110 | 0.260878  | H      | -1.353895 | 1.733933  | -0.232296 |
| H      | 1.955433  | -0.305369 | -1.533237 | N      | 0.183107  | -0.468154 | -0.469513 | H      | -2.031254 | 1.319656  | -1.796843 |
| C      | 3.080323  | -0.403913 | 0.316920  | H      | 0.120884  | 0.162688  | -1.256725 | C      | -3.149031 | 2.807963  | -0.737918 |
| O      | 0.223686  | 2.240036  | -1.113919 | C      | 1.475719  | -0.567774 | 0.163745  | H      | -3.365612 | 3.141789  | 0.281255  |
| H      | 3.467699  | 0.618486  | 0.287011  | H      | 1.354747  | -0.630431 | 1.248601  | H      | -2.632998 | 3.628184  | -1.245926 |
| H      | 2.903717  | -0.669187 | 1.366152  | C      | 2.199786  | -1.831124 | -0.318375 | H      | -4.106698 | 2.649469  | -1.246400 |
| S      | 4.321983  | -1.532907 | -0.382573 | C      | 2.259932  | 0.674848  | -0.209621 | O      | -0.821402 | -1.623800 | 1.371276  |
| C      | 5.696300  | -1.188291 | 0.739099  | H      | 1.566630  | -2.681615 | -0.031625 | H      | -2.734054 | -2.965105 | -0.610656 |
| H      | 5.441642  | -1.444965 | 1.771191  | H      | 2.256639  | -1.792796 | -1.418022 | H      | -2.944759 | -2.335191 | 0.856698  |
| H      | 6.534644  | -1.812249 | 0.421969  | O      | 3.471756  | -1.876045 | 0.279397  | N      | 0.169169  | -0.539348 | -0.351593 |
| H      | 6.002228  | -0.139573 | 0.685942  | O      | 2.099464  | 1.267058  | -1.255772 | H      | 0.043740  | 0.012815  | -1.187368 |
| O      | 1.763833  | 2.369229  | 0.520979  | H      | 3.864736  | -2.730228 | 0.080174  | C      | 1.433176  | -0.405974 | 0.320696  |
| C      | 2.029494  | 3.750215  | 0.258942  | O      | 3.134830  | 1.023284  | 0.726255  | H      | 1.258574  | -0.606070 | 1.384282  |
| H      | 2.806340  | 4.039724  | 0.965184  | C      | 3.960915  | 2.140891  | 0.396986  | C      | 2.494160  | -1.395282 | -0.182733 |
| H      | 2.372229  | 3.886663  | -0.769180 | H      | 4.609902  | 2.290931  | 1.258526  | C      | 1.930447  | 1.020877  | 0.154876  |
| H      | 1.127846  | 4.347026  | 0.413157  | H      | 4.552493  | 1.927749  | -0.496342 | H      | 3.382470  | -1.253927 | 0.451795  |
| 195    |           |           |           | H      | 3.350715  | 3.028574  | 0.214328  | C      | 2.024274  | -2.835776 | -0.096642 |
| IlePro |           |           |           | 197    |           |           |           | O      | 2.772264  | -1.007770 | -1.517323 |
| N      | 1.116782  | -1.880716 | -1.535248 | IleTyr |           |           |           | O      | 1.380965  | 1.869432  | -0.507082 |
| C      | 1.092674  | -0.906881 | -0.452041 | N      | -3.723819 | -2.411322 | -1.284926 | H      | 1.163052  | -2.985710 | -0.752730 |
| H      | 0.390218  | -1.277724 | 0.302376  | C      | -3.378538 | -1.050509 | -0.901632 | H      | 2.823088  | -3.517072 | -0.410752 |
| C      | 2.466926  | -0.829721 | 0.252885  | H      | -3.548203 | -0.395028 | -1.766545 | H      | 1.730908  | -3.098388 | 0.923233  |
| C      | 0.648604  | 0.463757  | -0.969858 | C      | -4.321843 | -0.565591 | 0.226811  | H      | 3.407223  | -1.631351 | -1.882756 |
| H      | 2.614293  | -1.839440 | 0.662953  | C      | -1.904728 | -0.955242 | -0.491950 | O      | 3.059970  | 1.220608  | 0.840613  |
| C      | 3.621293  | -0.549762 | -0.706070 | H      | -5.326876 | -0.720227 | -0.189993 | C      | 3.618545  | 2.528417  | 0.711511  |
| C      | 2.424078  | 0.158701  | 1.424608  | H      | -4.200472 | -1.426727 | 1.481515  | H      | 4.518460  | 2.528116  | 1.325442  |
| H      | 3.523477  | 0.435500  | -1.169185 | C      | -4.156698 | 0.930324  | 0.518740  | H      | 3.864804  | 2.736729  | -0.332254 |
| H      | 4.580262  | -0.600825 | -0.181913 | H      | -3.201563 | -1.355472 | 1.924172  | H      | 2.912566  | 3.283403  | 1.065263  |
| H      | 3.650927  | -1.300650 | -1.500696 | H      | -4.931866 | -1.123445 | 2.235816  | 199    |           |           |           |
| H      | 2.328849  | 1.180851  | 1.033337  | H      | -4.393182 | -2.477791 | 1.249947  | IleTrp |           |           |           |
| H      | 1.515368  | -0.030526 | 2.014652  | H      | -3.186832 | 1.112335  | 0.999878  | N      | -3.635855 | -2.236726 | -1.744073 |
| C      | 3.629550  | 0.082285  | 2.354312  | H      | -4.131360 | 1.477550  | -0.434922 | C      | -3.405465 | -0.949949 | -1.105150 |
| H      | 4.555426  | 0.363912  | 1.844480  | C      | -5.266971 | 1.519764  | 1.381505  | H      | -3.684538 | -0.158181 | -1.813589 |
| H      | 3.510315  | 0.755136  | 3.209301  | H      | -5.279708 | 1.084173  | 2.384996  | C      | -4.330663 | -0.800507 | 0.128014  |
| H      | 3.761661  | -0.932637 | 2.745688  | H      | -5.140527 | 2.600554  | 1.496813  | C      | -1.927995 | -0.779829 | -0.732521 |
| O      | 1.246478  | 0.997089  | -1.899314 | H      | -6.250639 | 1.345824  | 0.931481  | H      | -5.335661 | -0.980565 | -0.278541 |
| H      | 0.155689  | -2.047416 | -1.824704 | O      | -1.333271 | -1.896658 | 0.053528  | C      | -4.056277 | -1.871020 | 1.181363  |
| H      | 1.565573  | -1.432685 | -2.331388 | H      | -3.324271 | -2.608238 | -2.197905 | C      | -4.302788 | 0.618662  | 0.706929  |
| N      | -0.411126 | 1.092395  | -0.383233 | H      | -3.229511 | -3.031010 | -0.645077 | H      | -3.048744 | -1.776821 | 1.599557  |
| C      | -0.801902 | 2.422713  | -0.836115 | N      | -1.266900 | 0.208189  | -0.760238 | H      | -4.775142 | -1.803646 | 2.002710  |
| C      | -1.355041 | 0.533786  | 0.564322  | H      | -1.750111 | 1.004884  | -1.152561 | H      | -4.151285 | -2.871521 | 0.750623  |
| H      | -1.365662 | 2.362782  | -1.777191 | C      | 0.089303  | 0.430286  | -0.325195 | H      | -3.335296 | 0.806326  | 1.190515  |
| H      | 0.091822  | 3.020405  | -1.024098 | H      | 0.213784  | 0.027504  | 0.686304  | H      | -4.376127 | 1.341007  | -0.119147 |
| C      | -1.668571 | 2.920750  | 0.311639  | C      | 1.113296  | -0.283051 | -1.248779 | C      | -5.426272 | 0.906194  | 1.696702  |
| C      | -2.405920 | 1.656368  | 0.748036  | C      | 0.307378  | 1.928565  | -0.296663 | H      | -5.350855 | 0.283677  | 2.593263  |

|        |           |           |           |        |           |           |           |           |           |           |           |           |           |
|--------|-----------|-----------|-----------|--------|-----------|-----------|-----------|-----------|-----------|-----------|-----------|-----------|-----------|
|        | -5.402843 | 1.950649  | 2.022289  | HisAsp |           |           |           | O         | -4.036238 | -1.249375 | -1.152768 |           |           |
| H      | -6.406912 | 0.720226  | 1.244833  | N      | -3.308620 | -2.830637 | -0.843974 | C         | -5.122690 | -2.175557 | -1.170466 |           |           |
| O      | -1.240193 | -1.747762 | -0.414273 | C      | -2.706569 | -1.512448 | -0.831736 | H         | -4.907084 | -2.870815 | -1.980990 |           |           |
| H      | -3.268680 | -2.205150 | -2.690719 | H      | -2.876539 | -1.034827 | -1.804508 | H         | -5.191313 | -2.705684 | -0.217700 |           |           |
| H      | -3.049096 | -2.914373 | -1.260086 | C      | -3.409359 | -0.647343 | 0.243378  | H         | -6.066844 | -1.656035 | -1.350928 |           |           |
| N      | -1.428715 | 0.476285  | -0.771793 | C      | -1.202075 | -1.578191 | -0.556902 |           |           |           |           |           |           |
| H      | -2.012126 | 1.272719  | -0.989487 | H      | -4.480534 | -0.808358 | 0.093883  | 203       |           |           |           |           |           |
| C      | -0.078804 | 0.768009  | -0.354622 | H      | -3.166516 | -1.055928 | 1.232737  | HisAla    |           |           |           |           |           |
| H      | 0.164022  | 0.171603  | 0.531120  | C      | -3.127158 | 0.816720  | 0.196267  | N         | -1.702327 | 3.299496  | -0.124405 |           |           |
| C      | 0.948393  | 0.421601  | -1.467858 | N      | -2.073175 | 1.422592  | 0.843474  | C         | -1.512986 | 1.908688  | 0.239114  |           |           |
| C      | -0.035356 | 2.238331  | 0.001217  | C      | -3.778518 | 1.851067  | -0.437808 | H         | -2.043182 | 1.710678  | 1.178758  |           |           |
| H      | 0.608216  | -0.534427 | -1.880277 | H      | -1.327274 | 0.944288  | 1.347657  | C         | -2.146317 | 1.013988  | -0.853844 |           |           |
| H      | 0.870685  | 1.165396  | -2.269086 | C      | -2.139464 | 2.750789  | 0.570234  | C         | -0.030730 | 1.564730  | 0.406743  |           |           |
| C      | 2.353724  | 0.284713  | -0.991466 | N      | -3.159975 | 3.048999  | -0.202299 | H         | -3.130969 | 1.445929  | -1.052749 |           |           |
| O      | -0.869446 | 3.043864  | -0.355512 | H      | -4.675205 | 1.787088  | -1.040909 | H         | -1.562081 | 1.127300  | -1.776248 |           |           |
| C      | 3.415989  | 1.106194  | -1.255964 | H      | -1.422118 | 3.456846  | 0.967635  | C         | -2.311391 | -0.427389 | -0.508840 |           |           |
| C      | 2.268074  | -1.898520 | 0.437852  | O      | -0.686562 | -2.538415 | -0.000391 | N         | -1.333476 | -1.381119 | -0.680364 |           |           |
| C      | 2.855940  | -0.766905 | -0.148036 | H      | -2.990985 | -3.331725 | -1.668480 | C         | -3.378951 | -1.122244 | 0.013928  |           |           |
| H      | 3.456345  | 2.005551  | -1.855555 | H      | -2.914773 | -3.349311 | -0.060672 | H         | -0.373180 | -1.207267 | -0.976676 |           |           |
| N      | 4.544062  | 0.633865  | -0.626671 | N      | -0.460154 | -0.503264 | -0.943222 | C         | -1.845671 | -2.565662 | -0.259942 |           |           |
| C      | 4.234027  | -0.515269 | 0.058860  | H      | -0.940370 | 0.346234  | -1.204879 | N         | -3.083201 | -2.449829 | 0.166915  |           |           |
| C      | 3.062085  | -2.733288 | 1.207423  | C      | 0.922512  | -0.431708 | -0.549160 | H         | -4.352742 | -0.726502 | 0.272707  |           |           |
| H      | 1.212362  | -2.111561 | 0.284038  | H      | 1.456901  | -1.302883 | -0.939141 | H         | -1.275155 | -3.484552 | -0.294610 |           |           |
| H      | 5.458517  | 1.044741  | -0.690151 | C      | 1.550099  | 0.853195  | -1.110471 | O         | 0.847528  | 2.212714  | -0.149141 |           |           |
| C      | 5.035306  | -1.355951 | 0.832836  | C      | 1.072235  | -0.456570 | 0.972083  | H         | -1.471766 | 3.884712  | 0.673294  |           |           |
| C      | 4.428806  | -2.464420 | 1.403074  | H      | 1.425114  | 0.845924  | -2.197500 | H         | -0.994946 | 3.524719  | -0.822218 |           |           |
| H      | 2.624604  | -3.614105 | 1.668119  | H      | 1.046646  | 1.729882  | -0.693561 | N         | 0.269529  | 0.489161  | 1.182044  |           |           |
| H      | 6.092103  | -1.153093 | 0.982998  | C      | 3.019066  | 0.958308  | -0.772745 | H         | -0.474943 | -0.122881 | 1.483398  |           |           |
| H      | 5.022802  | -3.140087 | 2.011721  | O      | 0.286804  | 0.021521  | 1.763788  | C         | 1.630219  | 0.020438  | 1.248721  |           |           |
| O      | 1.037534  | 2.546896  | 0.724954  | O      | 3.482846  | 1.678273  | 0.077926  | H         | 2.269718  | 0.831852  | 1.610189  |           |           |
| C      | 1.171945  | 3.930345  | 1.051984  | O      | 2.223690  | -1.015183 | 1.321190  | C         | 1.734621  | -1.183877 | 2.179441  |           |           |
| H      | 1.234051  | 4.536704  | 0.145082  | C      | 2.525930  | -0.982219 | 2.719725  | C         | 2.148807  | -0.356130 | -0.136654 |           |           |
| H      | 0.317810  | 4.269118  | 1.643012  | H      | 3.470158  | -1.513406 | 2.828352  | H         | 1.112527  | -2.008766 | 1.816645  |           |           |
| H      | 2.092181  | 4.007522  | 1.629359  | H      | 2.625031  | 0.051690  | 3.057199  | H         | 2.768588  | -1.530379 | 2.239495  |           |           |
|        |           |           |           | H      | 1.736363  | -1.477313 | 3.287992  | H         | 1.402712  | -0.911207 | 3.184683  |           |           |
| 200    |           |           |           | O      | 3.742574  | 0.123667  | -1.530024 | O         | 1.483182  | -0.821892 | -1.039232 |           |           |
| IleVal |           |           |           | C      | 5.139045  | 0.100181  | -1.233328 | O         | 3.462482  | -0.175956 | -0.215371 |           |           |
| N      | 3.080817  | -2.155835 | 0.635505  | H      | 5.302789  | -0.227469 | -0.203919 | C         | 4.058991  | -0.535594 | -1.464205 |           |           |
| C      | 2.320377  | -0.915742 | 0.678264  | H      | 5.579467  | -0.607225 | -1.934767 | H         | 5.122810  | -0.331931 | -1.351765 |           |           |
| H      | 2.104583  | -0.679395 | 1.729057  | H      | 5.576028  | 1.093065  | -1.362095 | H         | 3.888899  | -1.592767 | -1.680574 |           |           |
| C      | 3.176907  | 0.247100  | 0.119369  |        |           |           |           | H         | 3.634949  | 0.066484  | -2.270469 |           |           |
| C      | 0.994382  | -1.060304 | -0.078011 | 202    |           |           |           | 204       |           |           |           |           |           |
| H      | 4.085839  | 0.222846  | 0.736693  | HisGlu | N         | 4.274015  | 0.838542  | -1.928238 | HisArg    | N         | -4.801309 | -1.689904 | -1.116860 |
| C      | 3.591844  | 0.004833  | -1.329784 | N      | 3.191898  | 0.062562  | -1.355886 | N         | -3.783419 | -0.671253 | -0.944248 |           |           |
| C      | 2.505598  | 1.610540  | 0.321178  | C      | 2.958798  | -0.773099 | -2.027082 | C         | -3.796472 | -0.003968 | -1.814713 |           |           |
| H      | 2.723727  | -0.036254 | -1.995603 | H      | 3.660382  | -0.535618 | -0.006624 | C         | -4.129061 | 0.177459  | 0.303836  |           |           |
| H      | 4.258832  | 0.796071  | -1.683497 | C      | 1.936198  | 0.909976  | -1.140169 | C         | -2.389768 | -1.284625 | -0.788300 |           |           |
| H      | 4.134586  | -0.939776 | -1.423360 | H      | 4.646997  | -0.964789 | -0.201879 | C         | -5.195836 | 0.402563  | 0.219229  |           |           |
| H      | 1.633425  | 1.698945  | -0.339859 | H      | 3.811845  | 0.287926  | 0.702955  | H         | -4.011067 | -0.452966 | 1.194715  |           |           |
| H      | 2.115705  | 1.666975  | 1.348005  | C      | 2.781485  | -1.584689 | 0.586233  | C         | -3.376843 | 1.455970  | 0.459926  |           |           |
| C      | 3.434078  | 2.798330  | 0.094341  | N      | 1.717927  | -1.322042 | 1.420354  | N         | -2.143322 | 1.561826  | 1.062649  |           |           |
| H      | 3.778721  | 2.855566  | -0.942409 | C      | 2.798321  | -2.957192 | 0.475849  | C         | -3.685482 | 2.744120  | 0.084045  |           |           |
| H      | 2.926648  | 3.740738  | 0.321899  | H      | 1.352408  | -0.398591 | 1.651036  | H         | -1.572028 | 0.786708  | 1.401313  |           |           |
| H      | 4.320177  | 2.733941  | 0.735477  | C      | 1.161664  | -2.514361 | 1.754712  | C         | -1.781571 | 2.869180  | 1.016212  |           |           |
| O      | 0.902044  | -1.777188 | -1.070068 | N      | 1.789562  | -3.528637 | 1.203093  | N         | -2.690628 | 3.617291  | 0.431530  |           |           |
| H      | 2.646022  | -2.830406 | 1.258354  | H      | 3.503182  | -3.559515 | -0.082952 | H         | -4.587963 | 3.082473  | -0.408942 |           |           |
| H      | 2.955240  | -2.544396 | -0.297877 | O      | 0.305106  | -2.586060 | 2.412135  | H         | -0.846293 | 3.222062  | 1.430634  |           |           |
| N      | -0.061392 | -0.362864 | 0.407063  | H      | 1.991986  | 2.127639  | -0.017889 | O         | -2.232665 | -2.428688 | -0.379214 |           |           |
| H      | 0.051793  | 0.296973  | 1.164660  | H      | 4.047141  | 1.062877  | -2.892607 | H         | -4.686306 | -2.119228 | -2.030414 |           |           |
| C      | -1.322272 | -0.315333 | -0.296104 | N      | 0.753775  | 0.245967  | -1.053796 | H         | -4.591079 | -2.435603 | -0.455020 |           |           |
| H      | -1.124016 | -0.297963 | -1.374669 | H      | 0.764261  | -0.761145 | -0.977204 | N         | -1.331830 | -0.489653 | -1.094332 |           |           |
| C      | -2.191865 | -1.566611 | 0.001183  | C      | -0.437823 | 0.961818  | -0.667564 | H         | -1.493731 | 0.495193  | -1.249105 |           |           |
| C      | -1.993053 | 0.983278  | 0.106400  | H      | -0.667500 | 1.720867  | -1.423531 | C         | 0.009507  | -0.929495 | -0.791483 |           |           |
| H      | -1.493152 | -2.397081 | -0.156440 | C      | -1.602164 | -0.024922 | -0.539804 | H         | 0.229222  | -1.839876 | -1.359153 |           |           |
| C      | -2.669719 | -1.595924 | 1.448932  | O      | -0.210875 | 1.701132  | 0.649832  | C         | 1.004537  | 0.175752  | -1.159958 |           |           |
| C      | -3.342130 | -1.735393 | -0.985339 | H      | -1.670504 | -0.589413 | -1.474729 | C         | 0.131170  | -1.286642 | 0.687318  |           |           |
| O      | -1.655814 | 1.653559  | 1.058199  | H      | -1.366272 | -0.744858 | 0.254321  | H         | 0.817679  | 0.442266  | -2.208848 |           |           |
| H      | -3.410057 | -0.810804 | 1.644291  | C      | -2.943117 | 0.647223  | -0.260841 | H         | 0.772138  | 1.066201  | -0.559733 |           |           |
| H      | -3.142828 | -2.555701 | 1.677367  | O      | 0.399972  | 1.258181  | 1.601861  | C         | 2.468155  | -0.203993 | -0.974027 |           |           |
| H      | -1.838459 | -1.456783 | 2.146745  | H      | -2.942741 | 1.200097  | 0.680704  | O         | -0.389631 | -0.672531 | 1.597585  |           |           |
| H      | -2.982819 | -1.729700 | -2.019492 | H      | -3.162709 | 1.374378  | -1.053674 | H         | 2.685564  | -0.412692 | 0.077749  |           |           |
| H      | -3.844781 | -2.692208 | -0.812318 | C      | -4.109739 | -0.309823 | -0.195732 | H         | 2.688755  | -1.118148 | -1.541806 |           |           |
| H      | -4.086339 | -0.940548 | -0.883645 | O      | -5.017574 | -0.234125 | 0.596192  | C         | 3.398806  | 0.920862  | -1.423219 |           |           |
| O      | -3.008866 | 1.300358  | -0.698719 | O      | -0.831561 | 2.874752  | 0.660827  | H         | 3.232577  | 1.157496  | -2.481397 |           |           |
| C      | -3.704139 | 2.500097  | -0.351090 | C      | -0.689998 | 3.633804  | 1.865560  | H         | 3.182535  | 1.822908  | -0.843202 |           |           |
| H      | -4.491696 | 2.610148  | -1.095315 | H      | -1.261443 | 4.546821  | 1.706269  | N         | 4.807436  | 0.636306  | -1.249541 |           |           |
| H      | -4.130011 | 2.420621  | 0.651765  | H      | -1.081696 | 3.076238  | 2.719227  | H         | 5.176287  | -0.097083 | -1.838385 |           |           |
| H      | -3.026064 | 3.356032  | -0.379129 | H      | 0.363099  | 3.863549  | 2.039802  | C         | 5.346708  | 0.655354  | 0.022855  |           |           |
| 201    |           |           |           |        |           |           |           |           |           |           |           |           |           |

|        |           |            |           |        |           |           |           |        |           |           |           |
|--------|-----------|------------|-----------|--------|-----------|-----------|-----------|--------|-----------|-----------|-----------|
| N      | 4.635964  | 1.004444   | 1.030211  | O      | 0.980801  | -0.075227 | 1.548240  | O      | 1.670536  | -0.989797 | -0.671773 |
| N      | 6.677834  | 0.241826   | 0.026187  | H      | 3.548306  | 2.647171  | -1.592457 | C      | 3.636712  | -0.370011 | 0.204658  |
| H      | 5.210185  | 1.091674   | 1.865339  | O      | 2.783493  | -1.136654 | 0.743426  | C      | 4.293043  | -1.029719 | -0.881938 |
| H      | 7.219021  | 0.581253   | -0.757306 | C      | 3.220512  | -1.355135 | 2.087606  | H      | 3.999248  | -0.577132 | -1.831256 |
| H      | 7.151541  | 0.389119   | 0.904476  | H      | 4.162367  | -1.894792 | 2.005112  | H      | 5.359245  | -0.895557 | -0.706190 |
| O      | 0.936945  | -2.324244  | 0.873794  | H      | 3.365606  | -0.401181 | 2.599032  | H      | 4.035253  | -2.091091 | -0.897550 |
| C      | 1.151755  | -2.696212  | 2.237693  | H      | 2.481147  | -1.948295 | 2.629515  |        |           |           |           |
| H      | 1.823269  | -3.552890  | 2.205963  |        |           |           |           | 209    |           |           |           |
| H      | 1.605186  | -1.870971  | 2.791364  | 207    |           |           |           | HisGln |           |           |           |
| H      | 0.203656  | -2.966593  | 2.707115  | HisPhe |           |           |           | N      | -3.824637 | -1.804738 | -1.628650 |
| 205    |           |            |           | N      | -4.043042 | -2.430969 | -0.861576 | C      | -2.918624 | -0.746818 | -1.224125 |
| HisAsn |           |            |           | C      | -3.258152 | -1.212312 | -0.840525 | H      | -2.879297 | 0.010410  | -2.016472 |
| N      | -3.085144 | -2.692735  | -1.014550 | H      | -3.399056 | -0.680808 | -1.789616 | C      | -3.478257 | -0.066701 | 0.049289  |
| C      | -2.466770 | -1.386240  | -0.906621 | C      | -3.781960 | -0.297607 | 0.293813  | C      | -1.511309 | -1.282576 | -0.953779 |
| H      | -2.671863 | -0.818315  | -1.822466 | C      | -1.770303 | -1.498393 | -0.626735 | H      | -4.543996 | 0.083372  | -0.144361 |
| C      | -3.110460 | -0.621797  | 0.275919  | H      | -4.870538 | -0.294487 | 0.190035  | H      | -3.408043 | -0.778531 | 0.882211  |
| C      | -0.954418 | -1.488270  | -0.696602 | H      | -3.560262 | -0.778401 | 1.255392  | C      | -2.868796 | 1.243144  | 0.417635  |
| H      | -4.190520 | -0.737057  | 0.149934  | C      | -3.290576 | 1.110537  | 0.283642  | N      | -1.712453 | 1.385334  | 1.152695  |
| H      | -2.846171 | -1.140468  | 1.206376  | N      | -2.116991 | 1.527843  | 0.870501  | C      | -3.263870 | 2.534077  | 0.149461  |
| C      | -2.783479 | 2.830299   | 0.374996  | C      | -3.829773 | 2.257025  | -0.255861 | H      | -1.114591 | 0.628163  | 1.481633  |
| N      | -1.685134 | 1.331782   | 1.036400  | H      | -1.411491 | 0.928691  | 1.300401  | C      | -1.476927 | 2.716326  | 1.282449  |
| C      | -3.429198 | 1.945821   | -0.110323 | C      | -2.010991 | 2.864101  | 0.655755  | N      | -2.395559 | 3.444033  | 0.688316  |
| H      | -0.923043 | 0.784126   | 1.437099  | N      | -3.030142 | 3.342615  | -0.022234 | H      | -4.143683 | 2.847345  | -0.398028 |
| C      | -1.721593 | 2.682901   | -0.213665 | H      | -4.767119 | 2.349890  | -0.789405 | O      | -0.620845 | 3.099771  | 1.821777  |
| N      | -2.764260 | 3.093688   | 0.227048  | H      | -1.173595 | 3.441746  | 1.024839  | H      | -0.318180 | -2.449320 | -0.632395 |
| H      | -4.352920 | 1.972951   | -0.674047 | O      | -1.384691 | -2.514469 | -0.061805 | H      | -3.566097 | -2.124700 | -2.557538 |
| H      | -0.968794 | 3.321676   | 1.357002  | H      | -3.838952 | -2.942477 | -1.715188 | H      | -3.642881 | -2.602227 | -1.021209 |
| O      | -0.436525 | -2.482805  | -0.204550 | H      | -3.691569 | -3.025999 | -0.112949 | N      | -0.481536 | -0.401894 | -1.057725 |
| H      | -2.816262 | -3.113987  | -1.898896 | N      | -0.895304 | -0.551978 | -1.065605 | H      | -0.683622 | 0.584584  | -1.137043 |
| H      | -2.657493 | -3.285988  | -0.305157 | H      | -1.256881 | 0.344268  | -1.350444 | C      | 0.840681  | -0.810116 | -0.649624 |
| N      | -0.214259 | -0.404704  | -1.048816 | C      | 0.502686  | -0.654353 | -0.710918 | H      | 1.153046  | -1.665948 | -1.257923 |
| H      | -0.695578 | 0.455216   | -1.268922 | H      | 0.943917  | -1.531175 | -1.195502 | C      | 1.814002  | 0.358343  | -0.827566 |
| C      | 1.189961  | -0.357836  | -0.715207 | C      | 1.227395  | 0.623920  | -1.165889 | C      | 0.819268  | -1.284320 | 0.801798  |
| H      | 1.745719  | -1.115806  | -1.274178 | C      | 0.675016  | -0.837008 | 0.794784  | H      | 1.679215  | 0.752946  | -1.841002 |
| C      | 1.748848  | 1.020339   | -1.068336 | H      | 1.075018  | 0.720076  | -2.247256 | H      | 1.555591  | 1.171676  | -0.140854 |
| C      | 1.391406  | -0.635660  | 0.775070  | H      | 0.734077  | 1.480425  | -0.690392 | C      | 3.274602  | -0.015588 | -0.625971 |
| H      | 1.424709  | 1.266484   | -2.087318 | C      | 2.698811  | 0.632906  | -0.845298 | O      | 0.153702  | -0.789876 | 1.688582  |
| H      | 1.332061  | 1.779964   | -0.396794 | O      | 0.077780  | -0.196858 | 1.640034  | H      | 3.421363  | -0.507767 | 0.343752  |
| C      | 3.272337  | 1.025265   | -1.085421 | C      | 3.176236  | 1.289794  | 0.291284  | H      | 3.600317  | -0.738192 | -1.384178 |
| O      | 0.698921  | -0.173884  | 1.663024  | C      | 3.610038  | -0.034559 | -1.667353 | C      | 4.163159  | 1.219844  | -0.651173 |
| O      | 3.910947  | 0.101526   | -1.553827 | H      | 2.477109  | 1.816455  | 0.936832  | O      | 3.736596  | 2.337974  | -0.422439 |
| N      | 3.850345  | 2.138730   | -0.568833 | C      | 4.533306  | 1.278286  | 0.601423  | N      | 5.472219  | 0.978238  | -0.922094 |
| H      | 4.852454  | 2.220647   | -0.628150 | C      | 4.966314  | -0.048474 | -1.360019 | H      | 6.111185  | 1.756014  | -0.903667 |
| H      | 3.316685  | 2.916387   | -0.222369 | H      | 3.253274  | -0.543812 | -2.559824 | H      | 5.826441  | 0.057064  | -1.110104 |
| O      | 2.460189  | -1.382535  | 0.994027  | H      | 4.889220  | 1.799532  | 1.485479  | O      | 1.675428  | -2.282365 | 1.003912  |
| C      | 2.736045  | -1.679843  | 2.364409  | C      | 5.431677  | 0.608106  | -0.223522 | C      | 1.717455  | -2.789414 | 2.341156  |
| H      | 3.645880  | -2.277694  | 2.356234  | H      | 5.662274  | -0.568610 | -2.011794 | H      | 2.462977  | -3.583188 | 2.331689  |
| H      | 2.882398  | -0.760249  | 2.935555  | H      | 6.491275  | 0.601962  | 0.014506  | H      | 1.999031  | -2.001500 | 3.043383  |
| H      | 1.907582  | -2.243497  | 2.798658  | O      | 1.614301  | -1.725370 | 1.074120  | H      | 0.738986  | -3.184612 | 2.621557  |
| 206    |           |            |           | C      | 1.896774  | -1.907708 | 2.462872  |        |           |           |           |
| HisCys |           |            |           | H      | 2.666257  | -2.676759 | 2.507080  | 210    |           |           |           |
| N      | -2.812678 | -2.854143  | -0.798638 | H      | 2.259940  | -0.975387 | 2.901371  | HisIle |           |           |           |
| C      | -2.269149 | -1.511406  | -0.773785 | H      | 0.997342  | -2.229704 | 2.991621  | N      | -2.933801 | -2.647062 | -1.434460 |
| H      | -2.587646 | -0.981388  | -1.679781 | 208    |           |           |           | C      | -2.335400 | -1.364642 | -1.112628 |
| C      | -2.854357 | -0.752886  | 0.443241  | HisGly |           |           |           | H      | -2.451116 | -0.693412 | -1.972378 |
| C      | -0.740738 | -1.515359  | -0.699274 | N      | -1.714049 | 3.188121  | -0.405698 | C      | -3.100246 | -0.743988 | 0.080009  |
| H      | -3.931681 | -0.937995  | 0.414991  | C      | -1.470254 | 1.852027  | 0.103013  | C      | -0.852952 | -1.512894 | -0.762114 |
| H      | -2.479670 | -1.225934  | 1.359836  | H      | -2.017818 | 1.726039  | 1.045093  | H      | -4.160815 | -0.888114 | -0.143930 |
| C      | -2.610391 | 0.718624   | 0.476128  | C      | -2.030228 | 0.821655  | -0.907309 | H      | -2.884410 | -1.340375 | 0.976328  |
| N      | -1.515067 | 1.306615   | 1.068084  | C      | 0.021844  | 1.607308  | 0.343982  | C      | -2.860756 | 0.704712  | 0.334435  |
| C      | -3.337427 | 1.776365   | -0.023770 | H      | -3.014710 | 1.201108  | -1.194601 | N      | -1.777217 | 1.209140  | 1.017123  |
| H      | -0.706036 | 0.816839   | 1.449356  | H      | -1.408787 | 0.847573  | -1.812027 | C      | -3.600006 | 1.815467  | -0.004103 |
| C      | -1.631588 | 2.647838   | 0.893716  | C      | -2.183530 | -0.575057 | -0.408747 | H      | -0.985387 | 0.676031  | 1.376627  |
| N      | -2.724060 | 2.971504   | 0.238515  | N      | -1.172086 | -1.509822 | -0.390722 | C      | -1.916137 | 2.559801  | 1.052478  |
| H      | -4.284580 | 1.730153   | -0.545903 | C      | -3.272319 | -1.239586 | 0.108396  | N      | -3.008041 | 2.964851  | 0.443947  |
| H      | -0.896615 | 3.344085   | 1.276086  | H      | -0.200674 | -1.349407 | -0.654042 | H      | -4.540265 | 1.834972  | -0.540177 |
| O      | -0.114789 | -2.477193  | -0.273867 | C      | -1.689586 | -2.655168 | 0.122782  | H      | -1.193752 | 3.198884  | 1.542951  |
| H      | -2.597743 | -3.282858  | -1.693956 | N      | -2.959062 | -2.530702 | 0.437241  | O      | -0.415537 | -2.545286 | -0.267181 |
| H      | -2.291567 | -0.3403658 | -0.117363 | H      | -4.271880 | -0.847550 | 0.245976  | H      | -2.559679 | -2.975016 | -2.320334 |
| N      | -0.106946 | -0.379196  | -1.098592 | H      | -1.096414 | -3.552396 | 0.240831  | H      | -2.591879 | -3.315063 | -0.745123 |
| H      | -0.661405 | 0.453036   | -1.245234 | O      | 0.882822  | 2.242440  | -0.249340 | N      | -0.043820 | -0.449073 | -1.002851 |
| C      | 1.310140  | -0.239897  | -0.861285 | H      | -1.524084 | 3.861674  | 0.330688  | H      | -0.449912 | 0.434013  | -1.272946 |
| H      | 1.856750  | -0.989619  | -1.442191 | H      | -1.004216 | 3.373573  | -1.112586 | C      | 1.339706  | -0.503948 | -0.597120 |
| C      | 1.731421  | 1.167302   | -1.286638 | H      | 0.351917  | 0.642016  | 1.247482  | H      | 1.791290  | -1.398329 | -1.039438 |
| C      | 1.641419  | -0.480276  | 0.612903  | N      | -0.365866 | 0.015415  | 1.578390  | C      | 2.109042  | 0.741621  | -1.092716 |
| H      | 1.449613  | 1.304291   | -2.334127 | C      | 1.731915  | 0.287019  | 1.403223  | C      | 1.433705  | -0.681057 | 0.915595  |
| H      | 1.195986  | 1.900326   | -0.674077 | C      | 2.309530  | -0.420576 | 0.188059  | H      | 1.842238  | 0.824342  | -2.157063 |
| S      | 3.533333  | 1.396120   | -1.101867 | H      | 2.331229  | 1.183270  | 1.582257  | C      | 1.673002  | 2.024536  | -0.384804 |
|        |           |            |           | H      | 1.849384  | -0.371301 | 2.269756  | C      | 3.625175  | 0.522651  | -1.018805 |
|        |           |            |           |        |           |           |           | O      | 0.655153  | -0.222447 | 1.727820  |

|        |           |           |           |        |           |           |           |        |           |           |           |
|--------|-----------|-----------|-----------|--------|-----------|-----------|-----------|--------|-----------|-----------|-----------|
| H      | 1.991293  | 2.023401  | 0.663458  | C      | 1.159714  | -0.417992 | -0.646169 | N      | -1.790489 | 1.380160  | 1.211207  |
| H      | 2.112196  | 2.900687  | -0.867639 | H      | 1.665829  | -1.205786 | -1.211939 | C      | -3.255633 | 2.596830  | 0.159461  |
| H      | 0.587415  | 2.164716  | -0.392139 | C      | 1.802236  | 0.946865  | -0.920194 | H      | -1.225112 | 0.597816  | 1.538858  |
| H      | 3.933857  | 0.450470  | 0.031215  | C      | 1.281098  | -0.779497 | 0.831277  | C      | -1.494797 | 2.698755  | 1.342253  |
| H      | 3.860671  | -0.449870 | -1.468476 | H      | 1.652340  | 1.170661  | -1.985177 | N      | -2.360400 | 3.466965  | 0.719884  |
| C      | 4.437542  | 1.604992  | -1.719682 | H      | 1.240283  | 1.702841  | -0.354591 | H      | -4.104746 | 2.949534  | -0.411943 |
| H      | 4.326317  | 2.581202  | -1.238687 | C      | 3.292853  | 1.072215  | -0.590705 | H      | -0.639682 | 3.043786  | 1.908558  |
| H      | 5.502674  | 1.356363  | -1.707116 | O      | 0.563358  | -0.355462 | 1.715528  | O      | -1.458723 | -2.403919 | -0.654685 |
| H      | 4.135782  | 1.712778  | -2.767541 | H      | 3.428300  | 0.861485  | 0.479657  | H      | -3.743789 | -2.053772 | -2.535938 |
| O      | 2.514307  | -1.375202 | 1.258338  | C      | 4.148312  | 0.082566  | -1.378830 | H      | -3.795807 | -2.533311 | -0.998874 |
| C      | 2.685974  | -1.591237 | 2.661486  | C      | 3.748868  | 2.507544  | -0.844800 | N      | -0.618811 | -0.353806 | -1.061226 |
| H      | 3.604611  | -2.167670 | 2.759901  | H      | 3.997014  | 0.209784  | -2.457633 | H      | -0.822339 | 0.632794  | -1.134297 |
| H      | 2.769026  | -0.638957 | 3.190208  | H      | 5.211249  | 0.244581  | -1.173676 | C      | 0.705426  | -0.765693 | -0.663924 |
| H      | 1.836712  | -2.148648 | 3.061990  | H      | 3.918976  | -0.954889 | -1.120313 | H      | 1.037260  | -1.588118 | -1.306695 |
| 211    |           |           |           | H      | 3.162382  | 3.226509  | -0.263327 | C      | 1.665419  | 0.422337  | -0.790322 |
| HisHis |           |           |           | H      | 4.801778  | 2.637253  | -0.576291 | C      | 0.689063  | -1.299301 | 0.766963  |
| N      | -3.938188 | -2.131933 | -1.167157 | H      | 3.642247  | 2.769202  | -1.904250 | H      | 1.575039  | 0.812199  | -1.811038 |
| C      | -3.092174 | -0.968292 | -0.997196 | O      | 2.322723  | -1.572607 | 1.056610  | H      | 1.339429  | 1.218468  | -0.109109 |
| H      | -3.195886 | -0.320520 | -1.876409 | C      | 2.522968  | -1.950501 | 2.421055  | C      | 3.119342  | 0.063287  | -0.515760 |
| C      | -3.577692 | -0.168059 | 0.236679  | H      | 3.410963  | -2.580745 | 2.424442  | O      | 0.042817  | -0.827905 | 1.680829  |
| C      | -1.621719 | -1.350913 | -0.815374 | H      | 2.672888  | -1.067742 | 3.046815  | H      | 3.253821  | -0.269434 | 0.519001  |
| H      | -4.659297 | -0.063062 | 0.114983  | H      | 1.656029  | -2.504828 | 2.786341  | H      | 3.438186  | -0.753803 | -1.173277 |
| H      | -3.421888 | -0.784622 | 1.131008  | 213    |           |           |           | S      | 4.163675  | 1.519703  | -0.812798 |
| C      | -2.970469 | 1.182154  | 0.421281  | HisLys |           |           |           | C      | 5.775925  | 0.809451  | -0.411386 |
| N      | -1.819482 | 1.419256  | 1.137814  | N      | -4.232889 | -1.425250 | -1.560772 | H      | 6.020523  | -0.024441 | -1.075035 |
| C      | -3.359037 | 2.426821  | -0.023355 | C      | -3.211913 | -0.461208 | -1.199362 | H      | 6.517273  | 1.598211  | -0.555245 |
| H      | -1.189025 | 0.711540  | 1.515437  | H      | -3.121022 | 0.280098  | -2.002740 | H      | 5.817728  | 0.477699  | 0.629741  |
| C      | -1.576582 | 2.753560  | 1.083294  | C      | -3.656987 | 0.285399  | 0.082016  | O      | 1.531242  | -2.315879 | 0.915345  |
| N      | -2.488575 | 3.398691  | 0.390613  | C      | -1.856866 | -1.131795 | -0.963081 | C      | 1.589597  | -0.267826 | 2.229939  |
| H      | -4.237687 | 2.667671  | -0.608006 | H      | -4.696824 | 0.575480  | -0.091995 | H      | 2.328018  | -3.675351 | 2.176507  |
| H      | -0.728108 | 3.204226  | 1.581539  | H      | -3.666362 | -0.431582 | 0.913136  | H      | 1.889236  | -2.120077 | 2.958534  |
| O      | -1.287248 | -2.451657 | -0.395719 | C      | -2.868548 | 1.498667  | 0.443362  | H      | 0.612139  | -3.275107 | 2.509625  |
| H      | -3.762909 | -2.540260 | -2.080474 | N      | -1.712449 | 1.476845  | 1.190549  | 215    |           |           |           |
| H      | -3.619810 | -2.835297 | -0.502524 | C      | -3.070130 | 2.831900  | 0.163985  | HisPro |           |           |           |
| N      | -0.703776 | -0.390749 | -1.099469 | H      | -1.214938 | 0.642776  | 1.503254  | N      | 0.254626  | -2.399867 | 1.535795  |
| H      | -1.031687 | 0.550302  | -1.266091 | C      | -1.286680 | 2.759652  | 1.313887  | C      | -0.384639 | -1.436405 | 0.651147  |
| C      | 0.686208  | -0.586674 | -0.752029 | N      | -2.083843 | 3.610164  | 0.706869  | H      | 0.119095  | -1.479488 | -0.320166 |
| H      | 1.123142  | -1.359989 | -1.391946 | H      | -3.891427 | 3.266320  | -0.391566 | C      | -1.851458 | -1.840536 | 0.443022  |
| C      | 1.414639  | 0.746899  | -0.944527 | H      | -0.392511 | 3.018652  | 1.865617  | C      | -0.328747 | -0.024513 | 1.241385  |
| C      | 0.807941  | -1.063343 | 0.696730  | O      | -1.770571 | -2.308188 | -0.630372 | H      | -1.859590 | -2.829060 | -0.022762 |
| H      | 1.198315  | 1.090044  | -0.966424 | H      | -4.047067 | -1.768854 | -2.498506 | H      | -2.308854 | -1.944727 | 1.434152  |
| H      | 0.955490  | 1.477240  | -0.263819 | H      | -4.103776 | -2.236261 | -0.957668 | C      | -2.643257 | -0.881890 | -0.378167 |
| C      | 2.887763  | 0.688856  | -0.718425 | N      | -0.752615 | -0.354148 | -1.100283 | N      | -3.109890 | 0.306861  | 0.133377  |
| O      | 0.240442  | -0.543550 | 1.638292  | H      | -0.867444 | 0.643640  | -1.205713 | C      | -3.072405 | -0.882123 | -1.683948 |
| N      | 3.627679  | 1.827176  | -0.491790 | C      | 0.540739  | -0.865720 | -0.711133 | H      | -2.904582 | 0.630123  | 1.069862  |
| C      | 3.815394  | -0.324560 | -0.723329 | H      | 0.816041  | -1.701613 | -1.363276 | C      | -3.773347 | 0.950246  | -0.860879 |
| H      | 3.266220  | 2.765056  | -0.425566 | C      | 1.583724  | 0.251198  | -0.817655 | N      | -3.774258 | 0.258784  | -1.976879 |
| C      | 4.930402  | 1.454595  | -0.372888 | O      | 0.484220  | -1.412133 | 0.712699  | H      | -2.920710 | -1.656761 | -2.424402 |
| N      | 5.079010  | 0.160367  | -0.505173 | H      | 1.543417  | 0.639489  | -1.843278 | H      | -4.241233 | 1.914893  | -0.715874 |
| H      | 3.635343  | -1.381770 | -0.856442 | H      | 1.280612  | 1.073345  | -0.154950 | O      | -1.040922 | 0.259491  | 2.208215  |
| H      | 5.720959  | 2.169004  | -0.186932 | C      | 3.010006  | -0.179884 | -0.494972 | H      | 1.244739  | -2.179125 | 1.607279  |
| O      | 1.649055  | -2.076978 | 0.813237  | O      | -0.085677 | -0.875740 | 1.642849  | H      | -0.138638 | -2.280110 | 2.466348  |
| C      | 1.844481  | -2.567932 | 2.141896  | H      | 3.072736  | -0.517506 | 0.547673  | N      | 0.524972  | 0.887822  | 0.714423  |
| H      | 2.564042  | -3.379852 | 2.051305  | H      | 3.276292  | -1.049509 | -1.110506 | C      | 0.557788  | 2.251888  | 1.236845  |
| H      | 2.234626  | -1.777416 | 2.786419  | C      | 4.018201  | 0.939694  | -0.727351 | C      | 1.354071  | 0.731980  | -0.469578 |
| H      | 0.898564  | -2.933143 | 2.547055  | H      | 3.997128  | 1.263214  | -1.775019 | H      | 1.277166  | 2.326796  | 2.062858  |
| 212    |           |           |           | H      | 3.733424  | 1.817200  | -0.128530 | H      | -0.427153 | 2.511307  | 1.628410  |
| HisLeu |           |           |           | C      | 5.444665  | 0.538946  | -0.377997 | C      | 0.999187  | 3.067202  | 0.029019  |
| N      | -3.189669 | -2.534947 | -1.283907 | H      | 5.471806  | 0.191488  | 0.671914  | C      | 1.984155  | 2.130386  | -0.664927 |
| C      | -2.526955 | -1.266442 | -1.051430 | H      | 5.732581  | -0.323229 | -0.993174 | H      | 0.751822  | 0.465942  | -1.346775 |
| H      | -2.676249 | -0.620811 | -1.925445 | N      | 6.365235  | 1.626368  | -0.674639 | C      | 2.446122  | -0.310685 | -0.305318 |
| C      | -3.186134 | -0.571291 | 0.165009  | H      | 6.188585  | 2.406117  | -0.048392 | H      | 1.448714  | 4.024670  | 0.303457  |
| C      | -1.028988 | -1.447677 | -0.796837 | H      | 7.320675  | 1.333446  | -0.500517 | H      | 0.140405  | 3.265888  | -0.621341 |
| H      | -4.264320 | -0.651255 | 0.001045  | O      | 1.201251  | -2.522127 | 0.838928  | H      | 2.954359  | 2.170259  | -0.156753 |
| H      | -2.961282 | -1.160436 | 1.063531  | C      | 1.213121  | -3.098523 | 2.147084  | H      | 2.149069  | 2.350741  | -1.721026 |
| C      | -2.832706 | 0.862654  | 0.374214  | H      | 1.843595  | -3.983328 | 2.073012  | O      | 2.784544  | -0.827394 | 0.733585  |
| N      | -1.732805 | 1.294995  | 1.080589  | H      | 1.620441  | -2.393250 | 2.875199  | O      | 3.016817  | -0.558462 | -1.487962 |
| C      | -3.452464 | 2.021556  | -0.036610 | H      | 0.198646  | -3.372714 | 2.443821  | C      | 4.093161  | -1.499325 | -1.459943 |
| H      | -0.995026 | 0.703648  | 1.463452  | 214    |           |           |           | H      | 3.744529  | -2.466449 | -1.090655 |
| C      | -1.743603 | 2.652132  | 1.054694  | HisMet |           |           |           | H      | 4.437831  | -1.584141 | -2.489536 |
| N      | -2.770944 | 3.129628  | 0.388456  | N      | -3.979701 | -1.732773 | -1.601512 | H      | 4.897570  | -1.142395 | -0.812741 |
| H      | -4.368416 | 2.105835  | -0.607410 | C      | -3.055890 | -0.685130 | -1.213516 | 216    |           |           |           |
| H      | -0.982013 | 3.243178  | 1.546255  | H      | -3.018569 | 0.069364  | -2.008693 | HisSer |           |           |           |
| O      | -0.572156 | -2.499628 | -0.365018 | C      | -3.589028 | 0.006054  | 0.065408  | N      | -2.138402 | 3.199400  | 0.428027  |
| H      | -2.900667 | -2.898525 | -2.187364 | C      | -1.649946 | -1.233351 | -0.961660 | C      | -1.817337 | 1.792058  | 0.559023  |
| H      | -2.812858 | -3.196759 | -0.607070 | H      | -4.649557 | 0.194077  | -0.123444 | H      | -2.270493 | 1.407413  | 1.480931  |
| N      | -0.230073 | -0.376181 | -1.036868 | H      | -3.541281 | -0.713288 | 0.893236  | C      | -2.442492 | 1.021532  | -0.629916 |
| H      | -0.657602 | 0.521120  | -1.215946 | C      | -2.930054 | 1.289469  | 0.443194  | C      | -0.306226 | 1.553938  | 0.594639  |

|        |           |           |           |        |           |           |           |        |           |           |           |
|--------|-----------|-----------|-----------|--------|-----------|-----------|-----------|--------|-----------|-----------|-----------|
| H      | -3.473970 | 1.377420  | -0.701414 | C      | -1.953176 | 1.773104  | 0.309308  | H      | 6.901334  | -1.115513 | -1.108815 |
| H      | -1.937488 | 1.338559  | -1.551454 | H      | -2.274196 | 1.398466  | 1.288959  | O      | 0.942317  | -1.151230 | 1.814771  |
| C      | -2.448344 | -0.466216 | -0.519664 | C      | -2.589486 | 0.860132  | -0.767972 | C      | 0.991883  | -1.062826 | 3.239009  |
| N      | -1.414659 | -1.278185 | -0.929954 | C      | -0.422629 | 1.728486  | 0.230082  | H      | 1.164384  | -0.030462 | 3.552162  |
| C      | -3.396197 | -1.338952 | -0.032854 | H      | -3.642015 | 1.153975  | -0.809103 | H      | 0.053206  | -1.416533 | 3.670830  |
| H      | -0.498598 | -0.969617 | -1.258536 | H      | -2.155560 | 1.110866  | -1.744699 | H      | 1.820179  | -1.700419 | 3.544122  |
| C      | -1.780545 | -2.559564 | -0.671617 | C      | -2.512390 | -0.606985 | -0.513861 |        |           |           |           |
| N      | -2.975437 | -2.637630 | -0.129545 | N      | -1.438976 | -1.397928 | -0.856873 | 220    |           |           |           |
| H      | -4.370554 | -1.089001 | 0.367227  | C      | -3.399939 | -1.474669 | 0.080964  | HisVal |           |           |           |
| H      | -1.140824 | -3.399251 | -0.909932 | H      | -0.564895 | -1.072993 | -1.267669 | N      | 2.425817  | 3.112942  | -0.719705 |
| O      | 0.484807  | 2.350679  | 0.107199  | C      | -1.723459 | -2.662460 | -0.456634 | C      | 1.991787  | 1.728207  | -0.695184 |
| H      | -1.907600 | 3.674165  | 1.295834  | N      | -2.904031 | -2.750422 | 0.113654  | H      | 2.298216  | 1.243891  | -1.630391 |
| H      | -1.495822 | 3.590518  | -0.259058 | H      | -4.379502 | -1.237975 | 0.476322  | C      | 2.705669  | 1.003055  | 0.469904  |
| N      | 0.115481  | 0.392428  | 1.162294  | H      | -1.031642 | -3.480466 | -0.605503 | C      | 0.474230  | 1.621931  | -0.526994 |
| H      | -0.575502 | -0.315561 | 1.368309  | O      | 0.217449  | 2.624158  | -0.305069 | H      | 3.751369  | 1.318266  | 0.415846  |
| C      | 1.499314  | 0.002069  | 1.049320  | H      | -2.194827 | 3.674863  | 0.951239  | H      | 2.307725  | 1.394132  | 1.415584  |
| H      | 2.137691  | 0.694427  | 1.605905  | H      | -1.927600 | 3.542416  | -0.627469 | C      | 2.656379  | -0.486348 | 0.447331  |
| C      | 1.656585  | -1.405605 | 1.617939  | N      | 0.190120  | 0.647412  | 0.787206  | N      | 1.590939  | -1.238942 | 0.887012  |
| C      | 1.959842  | 0.019320  | -0.407000 | H      | -0.350487 | -0.173518 | 1.027145  | C      | 3.582580  | -1.414997 | 0.029190  |
| H      | 1.335131  | -1.389382 | 2.670963  | C      | 1.601469  | 0.461323  | 0.612632  | H      | 0.695178  | -0.883970 | 1.221935  |
| H      | 0.980382  | -2.079154 | 1.066081  | H      | 2.104518  | 1.420980  | 0.768379  | C      | 1.921474  | -2.544902 | 0.714912  |
| O      | 3.003142  | -1.773927 | 1.474335  | C      | 2.129746  | -0.560941 | 1.625110  | N      | 3.120188  | -2.691887 | 0.197108  |
| O      | 1.311884  | -0.423894 | -1.336559 | C      | 1.943416  | 0.022074  | -0.809607 | H      | 4.568015  | -1.218354 | -0.373463 |
| H      | 3.101150  | -2.683298 | 1.770389  | H      | 3.191779  | -0.730940 | 1.393736  | H      | 1.251828  | -3.348342 | 0.992218  |
| O      | 3.173098  | 0.527131  | -0.532350 | C      | 1.994931  | -0.078410 | 3.059414  | O      | -0.164090 | 2.484722  | 0.064487  |
| C      | 3.695873  | 0.547418  | -1.861605 | O      | 1.373066  | -1.735841 | 1.383080  | H      | 2.105069  | 3.545702  | -1.581141 |
| H      | 4.689769  | 0.984536  | -1.779488 | O      | 1.159855  | -0.376821 | -1.643176 | H      | 1.916694  | 3.596557  | 0.018691  |
| H      | 3.752337  | -0.466080 | -2.264995 | H      | 0.952889  | 0.149493  | 3.297495  | N      | -0.135410 | 0.524262  | -1.045182 |
| H      | 3.059221  | 1.156323  | -2.507107 | H      | 2.351375  | -0.846931 | 3.754270  | H      | 0.427490  | -2.383390 | -1.390449 |
|        |           |           |           | H      | 2.595311  | 0.820610  | 3.226814  | C      | -1.546924 | 0.324920  | -0.825757 |
| 217    |           |           |           | H      | 1.556513  | -2.370679 | 2.082453  | H      | -2.077591 | 1.219121  | -1.169667 |
| HisTyr |           |           |           | O      | 3.252451  | 0.131969  | -1.029598 | C      | -2.059347 | -0.895563 | -1.622607 |
| N      | -4.428220 | -2.343247 | -0.840270 | C      | 3.691942  | -0.261731 | -2.332261 | C      | -1.834070 | 0.205504  | 0.668096  |
| C      | -3.608289 | -1.147658 | -0.827782 | H      | 4.769988  | -0.107375 | -2.339006 | H      | -1.675206 | -0.739791 | -2.640502 |
| H      | -3.738036 | -0.616358 | -1.778572 | H      | 3.451362  | -1.311327 | -2.515645 | C      | -1.518177 | -2.226550 | -1.101205 |
| C      | -4.100691 | -0.213837 | 0.304985  | H      | 3.210278  | 0.352618  | -3.095878 | C      | -3.583624 | -0.917614 | -1.699643 |
| C      | -2.128465 | -1.475856 | -0.618781 |        |           |           |           | O      | -1.086659 | -0.283214 | 1.491932  |
| H      | -5.188782 | -0.175790 | 0.203132  | 219    |           |           |           | H      | -1.901954 | -2.442307 | -0.098539 |
| H      | -3.892995 | -0.699710 | 1.267190  | HisTrp |           |           |           | H      | -1.832078 | -3.041290 | -1.760102 |
| C      | -3.564287 | 1.177877  | 0.291457  | N      | -4.233745 | -2.864914 | -0.713543 | H      | -0.425282 | -2.254884 | -1.044530 |
| N      | -2.375056 | 1.557628  | 0.872075  | C      | -3.580446 | -1.574908 | -0.823646 | H      | -3.979715 | 0.019114  | -2.103328 |
| C      | -4.069862 | 2.340951  | -0.245127 | H      | -3.609814 | -1.247734 | -1.870218 | H      | -3.914313 | -1.732989 | -2.349686 |
| H      | -1.685033 | 0.936337  | 1.295967  | C      | -4.368559 | -0.541165 | 0.016800  | H      | -4.033599 | -1.071661 | -0.714371 |
| C      | -2.227770 | 2.889730  | 0.656305  | C      | -2.129420 | -1.631569 | -0.341340 | O      | -3.042800 | 0.668868  | 0.970351  |
| N      | -3.234921 | 3.400645  | -0.015973 | H      | -5.419835 | -0.685826 | -0.247037 | C      | -3.399268 | 0.597263  | 2.353536  |
| H      | -5.006804 | 2.463538  | -0.773358 | H      | -4.270651 | -0.812684 | 1.075931  | H      | -4.403009 | 1.014213  | 2.420384  |
| H      | -1.370141 | 3.440287  | 1.020292  | C      | -4.010052 | 0.890848  | -0.195542 | H      | -3.387122 | -0.438391 | 2.700761  |
| O      | -1.770728 | -2.498601 | -0.047312 | N      | -2.984495 | 1.540368  | 0.453792  | H      | -2.698326 | 1.182305  | 2.952480  |
| H      | -4.242242 | -2.863937 | -1.692473 | C      | -4.562749 | 1.853272  | -1.010837 |        |           |           |           |
| H      | -4.090375 | -2.944839 | -0.090568 | H      | -2.299646 | 1.115200  | 1.080261  | 221    |           |           |           |
| N      | -1.228637 | -0.558835 | -1.059559 | C      | -2.969914 | 2.821212  | 0.004869  | LeuAsp |           |           |           |
| H      | -1.565795 | 0.343662  | -1.363176 | N      | -3.911867 | 3.050247  | -0.882540 | N      | -3.027528 | -2.287268 | -1.502675 |
| C      | 0.168605  | -0.697277 | -0.722692 | H      | -5.411204 | 1.739192  | -1.673428 | C      | -2.766360 | -0.984570 | -0.907843 |
| H      | 0.584628  | -1.585038 | -1.209774 | H      | -2.255466 | 3.549269  | 0.366267  | C      | -2.815978 | -0.227253 | -1.701187 |
| C      | 0.923352  | 0.562626  | -1.180899 | O      | -1.758079 | -2.460135 | 0.481251  | C      | -3.733794 | -0.607917 | 0.228001  |
| C      | 0.345334  | -0.884052 | 0.781415  | H      | -3.842894 | -3.494353 | -1.408562 | C      | -1.349014 | -1.049909 | -0.349297 |
| H      | 0.769090  | 0.661340  | -2.262025 | H      | -3.955160 | -3.263207 | 0.181990  | H      | -4.757977 | -0.670804 | -0.169400 |
| H      | 0.448665  | 1.430540  | -0.706811 | N      | -1.280858 | -0.694183 | -0.835693 | C      | -3.641845 | -1.387731 | 0.995058  |
| C      | 2.394124  | 0.543026  | -0.862585 | H      | -1.661900 | 0.069802  | -1.375377 | H      | -3.539382 | 0.766881  | 0.766858  |
| O      | -0.224107 | -0.223589 | 1.630515  | C      | 0.048097  | -0.556296 | -0.287248 | H      | -2.505814 | 0.825225  | 1.248248  |
| C      | 2.894827  | 1.200736  | 0.261131  | H      | 0.645679  | -1.442872 | -0.521530 | C      | -3.756077 | 1.915793  | -0.106820 |
| C      | 3.297128  | -0.153947 | -1.672081 | C      | 0.704549  | 0.703703  | -0.878499 | C      | -4.472353 | 0.911993  | 2.077550  |
| H      | 2.215887  | 1.753367  | 0.906280  | C      | -0.007511 | -0.438011 | 1.232281  | H      | -4.761204 | 1.869042  | -0.543350 |
| C      | 4.250134  | 1.166555  | 0.573610  | H      | 0.695622  | 0.595464  | -1.970920 | H      | -3.658431 | 2.883241  | 0.396210  |
| C      | 4.650599  | -0.198226 | -1.375029 | H      | 0.064566  | 1.561284  | -0.636980 | H      | -3.035210 | 1.907508  | -0.930355 |
| H      | 2.934168  | -0.669320 | -2.558438 | C      | 2.093831  | 0.952813  | -0.394321 | H      | -4.306004 | 0.116711  | 2.811437  |
| H      | 4.619874  | 1.693323  | 1.451103  | O      | -0.783607 | 0.275148  | 1.841230  | H      | -4.323957 | 1.872596  | 2.581839  |
| C      | 5.134539  | 0.464863  | -0.245284 | C      | 2.485178  | 1.921526  | 0.491998  | H      | -5.521940 | 0.861780  | 1.763156  |
| H      | 5.350699  | -0.734651 | -2.006925 | C      | 3.541914  | -0.861918 | -1.596804 | O      | -1.008351 | -1.957468 | 0.401531  |
| O      | 6.466446  | 0.394028  | -0.001511 | C      | 3.280797  | 0.221171  | -0.744965 | H      | -4.022198 | -2.390599 | -1.677280 |
| H      | 6.669485  | 0.900216  | 0.791665  | H      | 1.891066  | 2.680096  | 0.983493  | H      | -2.766297 | -2.991903 | -0.817026 |
| O      | 1.256694  | -1.802697 | 1.055998  | N      | 3.837539  | 1.835630  | 0.713985  | N      | -0.511214 | -0.050613 | -0.706295 |
| C      | 1.538027  | -1.996067 | 2.443110  | C      | 4.356322  | 0.806357  | -0.032331 | H      | -0.804421 | 0.695986  | -1.321228 |
| H      | 1.929742  | -1.075905 | 2.882854  | C      | 4.841273  | -1.325513 | -1.714318 | C      | 0.824570  | 0.047720  | -0.178296 |
| H      | 0.631128  | -2.292361 | 2.974230  | H      | 2.738621  | -1.330346 | -2.159551 | C      | 0.807085  | -0.091888 | 0.909104  |
| H      | 2.284397  | -2.787839 | 2.483448  | H      | 4.368975  | 2.455255  | 1.299949  | C      | 1.756306  | -1.029212 | -0.770114 |
|        |           |           |           | C      | 5.667678  | 0.342781  | -0.147199 | C      | 1.322411  | 1.446342  | -0.492545 |
| 218    |           |           |           | C      | 5.892827  | -0.729172 | -0.995709 | H      | 1.255529  | -1.987137 | -0.592838 |
| HisThr |           |           |           | H      | 5.055897  | -2.163191 | -2.370988 | H      | 1.881896  | -0.888918 | -1.845659 |
| N      | -2.454028 | 3.123891  | 0.137900  | H      | 6.481776  | 0.803438  | 0.405184  | C      | 3.124275  | -1.086850 | -0.139013 |

|        |           |           |           |        |           |           |           |        |           |           |           |
|--------|-----------|-----------|-----------|--------|-----------|-----------|-----------|--------|-----------|-----------|-----------|
| O      | 0.723416  | 2.243541  | -1.179221 | H      | -3.597161 | -2.168092 | -1.171193 | C      | -3.427144 | 1.988116  | -0.257417 |
| O      | 4.170051  | -1.091896 | -0.742140 | H      | -2.639938 | -2.753139 | 0.020773  | C      | -4.242507 | 1.045469  | 1.919639  |
| O      | 2.511591  | 1.675598  | 0.060238  | N      | 0.376147  | -0.642522 | -0.349289 | H      | -4.421843 | 1.962630  | -0.719049 |
| C      | 3.096591  | 2.943397  | -0.248801 | H      | 0.370846  | -0.071731 | -1.182898 | H      | -3.311586 | 2.962747  | 0.227536  |
| H      | 4.061781  | 2.951874  | 0.254988  | C      | 1.628512  | -0.733174 | 0.359863  | H      | -2.686637 | 1.939655  | -1.061983 |
| H      | 3.226164  | 3.049968  | -1.327893 | H      | 1.443934  | -0.557019 | 1.427005  | H      | -4.117737 | 0.263237  | 2.675387  |
| H      | 2.462689  | 3.754281  | 0.116807  | C      | 2.295402  | -2.103635 | 0.208590  | H      | -4.090336 | 2.013527  | 2.408213  |
| O      | 3.035828  | -1.169669 | 1.198724  | C      | 2.520471  | 0.374094  | -0.163749 | H      | -5.281795 | 1.009981  | 0.70628   |
| C      | 4.285881  | -1.221309 | 1.880172  | H      | 2.506210  | -2.314811 | -0.843795 | O      | -0.812125 | -2.015405 | 0.410376  |
| H      | 4.865701  | -0.315281 | 1.685760  | H      | 3.228923  | -2.141014 | 0.774799  | H      | -3.754173 | -2.331033 | -1.741244 |
| H      | 4.044559  | -1.300126 | 2.939809  | H      | 1.611420  | -2.862667 | 0.592286  | H      | -2.532015 | -2.960321 | -0.852504 |
| H      | 4.868476  | -2.086396 | 1.554414  | O      | 2.258574  | 1.069748  | -1.120028 | N      | -0.210690 | -0.089490 | -0.620455 |
| 222    |           |           |           | O      | 3.644457  | 0.474098  | 0.547671  | H      | -0.488401 | 0.701658  | -1.185401 |
| LeuGlu |           |           |           | C      | 4.558923  | 1.475627  | 0.098533  | C      | 1.090793  | 0.013073  | -0.005096 |
| N      | -2.324512 | -3.046284 | -0.938354 | H      | 5.408319  | 1.425921  | 0.778487  | H      | 1.010600  | -0.004855 | 1.092120  |
| C      | -2.548947 | -1.629062 | -0.693570 | H      | 4.875546  | 1.273774  | -0.927403 | C      | 2.024072  | -1.145388 | -0.372011 |
| H      | -2.657166 | -1.124400 | -1.662795 | H      | 4.093754  | 2.463385  | 0.136297  | C      | 1.646878  | 1.366973  | -0.407133 |
| C      | -3.777789 | -1.333925 | 0.184981  | 224    |           |           |           | H      | 1.412006  | -2.054200 | -0.345928 |
| C      | -1.298292 | -1.117565 | 0.013832  | LeuArg |           |           |           | H      | 2.428214  | -1.033891 | -1.383818 |
| H      | -4.649945 | -1.809189 | -0.288773 | N      | -3.431761 | -2.824615 | -1.024783 | C      | 3.124041  | -1.325878 | 0.661325  |
| H      | -3.615451 | -1.849245 | 1.140601  | C      | -3.381380 | -1.405772 | -0.703386 | O      | 1.011389  | 2.209534  | -1.004040 |
| C      | -4.104301 | 0.139809  | 0.451887  | H      | -3.438100 | -0.835127 | -1.639858 | O      | 3.001530  | -0.972430 | 1.820784  |
| H      | -3.215646 | 0.610934  | 0.896666  | C      | -4.494972 | -0.943210 | 0.253136  | N      | 4.244431  | -1.942914 | 0.200318  |
| C      | -4.455805 | 0.901440  | -1.825175 | C      | -2.027625 | -1.168393 | -0.040432 | H      | 4.940454  | -2.208833 | 0.877747  |
| C      | -5.242028 | 0.246315  | 1.465318  | H      | -5.459343 | -1.241545 | -0.185461 | H      | 4.291474  | -2.339620 | -1.721986 |
| H      | -5.313732 | 0.439611  | -1.328905 | H      | -4.376225 | -1.518794 | 1.180402  | O      | 2.913792  | 1.516883  | -0.032930 |
| H      | -4.723180 | 1.938918  | -0.599946 | C      | -4.547447 | 0.552285  | 0.585001  | C      | 3.500210  | 2.778974  | -0.354370 |
| H      | -3.627333 | 0.930240  | -1.539802 | H      | -3.564901 | 0.849404  | 0.979144  | H      | 4.521023  | 2.731803  | 0.021754  |
| H      | -4.990095 | -0.259178 | 2.403197  | C      | -4.845327 | 1.411481  | -0.642933 | H      | 3.493043  | 2.941823  | -1.434721 |
| H      | -5.470563 | 1.292021  | 1.696322  | C      | -5.584275 | 0.808141  | 1.676913  | H      | 2.949976  | 3.589507  | 0.128841  |
| H      | -6.157260 | -0.213890 | 1.735589  | H      | -5.803433 | 1.124463  | -1.093207 | 226    |           |           |           |
| O      | -0.852143 | -1.693291 | 0.999943  | H      | -4.910369 | 2.470432  | -0.372476 | LeuCys |           |           |           |
| H      | -3.204079 | -3.496971 | -1.170093 | H      | -4.075439 | 1.323120  | -1.415877 | N      | -2.695939 | -2.419642 | -1.129565 |
| H      | -1.995325 | -3.454719 | -0.066650 | H      | -5.362812 | 0.231486  | 2.580866  | C      | -2.348889 | -1.051935 | -0.772011 |
| N      | -0.738337 | 0.007444  | -0.484876 | H      | -5.617841 | 1.867502  | 1.952223  | H      | -2.255319 | -0.466898 | -1.696370 |
| H      | -1.111954 | 0.473837  | -1.299339 | H      | -6.587050 | 0.522532  | 1.336331  | C      | -3.360499 | -0.374878 | 0.169449  |
| C      | 0.408402  | 0.620475  | 0.139082  | O      | -1.650734 | -1.876607 | 0.887529  | C      | -0.994651 | -1.127568 | -0.704950 |
| H      | 0.282572  | 0.579624  | 1.227694  | H      | -4.390880 | -3.099149 | -1.212407 | H      | -4.350272 | -0.430578 | -0.308279 |
| C      | 1.708354  | -0.122809 | -0.229825 | H      | -3.128637 | -3.330694 | -0.195766 | H      | -3.410962 | -0.990230 | 1.077140  |
| C      | 0.425476  | 2.068458  | -0.311994 | N      | -1.301021 | -0.130370 | -0.508078 | C      | -3.082450 | 1.081357  | 0.558652  |
| H      | 1.505903  | -1.183959 | -0.066246 | H      | -1.613842 | 0.426858  | -0.290617 | H      | -2.081706 | 1.128617  | 1.012262  |
| H      | 1.902264  | 0.012865  | -1.300638 | C      | -0.024109 | 0.225853  | 0.064584  | C      | -3.103930 | 2.022737  | -0.644738 |
| C      | 2.923506  | 0.288534  | 0.597905  | H      | -0.090870 | 0.142399  | 1.155097  | C      | -4.090759 | 1.539957  | 1.610284  |
| O      | -0.173685 | 2.481432  | -1.280059 | C      | 1.097803  | -0.708171 | -0.432074 | H      | -4.072027 | 1.973982  | -1.157935 |
| H      | 3.163828  | 1.346845  | 0.489146  | C      | 0.234433  | 1.668927  | -0.319891 | H      | -2.946774 | 3.059976  | -0.331760 |
| H      | 2.712148  | 0.111403  | 1.660955  | H      | 0.715461  | -1.724367 | -0.283585 | H      | -2.326784 | 1.786584  | -1.378357 |
| C      | 4.175581  | -0.480476 | 0.254757  | H      | 1.218587  | -0.562768 | -1.513327 | H      | -4.066082 | 0.896272  | 2.495538  |
| O      | 5.270450  | 0.008571  | 0.105823  | C      | 2.434721  | -0.550034 | 0.280833  | H      | -3.887319 | 2.566076  | 1.933768  |
| O      | 1.194408  | 2.829197  | 0.468872  | O      | -0.291374 | 2.219490  | -1.262672 | H      | -5.110763 | 1.515535  | 1.207926  |
| C      | 1.296887  | 4.199566  | 0.070953  | H      | 2.851653  | 0.448266  | 0.123595  | O      | -0.805299 | -1.906353 | 0.852501  |
| H      | 1.956964  | 4.668419  | 0.799175  | H      | 2.288598  | -0.676353 | 1.362851  | H      | -3.679958 | -2.469977 | -1.373812 |
| H      | 1.716234  | 4.276382  | -0.934644 | C      | 3.454901  | -1.571441 | -0.217540 | H      | -2.560652 | -2.992891 | -0.300103 |
| O      | 0.312591  | 4.672831  | 0.081647  | H      | 3.076915  | -2.591036 | -0.074265 | N      | -0.037723 | -0.280123 | -0.518405 |
| O      | 3.936325  | -1.798665 | 0.153555  | H      | 3.623076  | -1.426199 | -1.288519 | H      | -0.200907 | 0.351979  | -1.290190 |
| C      | 5.079102  | -2.596473 | -0.146516 | N      | 4.749732  | -1.484767 | 0.427034  | C      | 1.257005  | -0.199386 | 0.109213  |
| H      | 4.716812  | -3.622039 | -0.210714 | H      | 4.753213  | -1.709919 | 1.411975  | H      | 1.143337  | -0.186129 | 1.199415  |
| H      | 5.527553  | -2.287619 | -1.093972 | C      | 5.608334  | -0.457993 | 0.088656  | C      | 2.109517  | -1.424113 | -0.267347 |
| H      | 5.831090  | -2.504499 | 0.641251  | N      | 5.322615  | 0.356251  | -0.858949 | C      | 1.887200  | 1.102458  | -0.351893 |
| 223    |           |           |           | N      | 6.742591  | -0.443494 | 0.902021  | H      | 1.513682  | -2.295599 | 0.007837  |
| LeuAla |           |           |           | H      | 6.113495  | 0.963758  | -1.060664 | H      | 2.280835  | -1.431247 | -1.347637 |
| N      | -2.631190 | -2.278260 | -0.878964 | H      | 7.105786  | -1.362236 | 1.117137  | S      | 3.697931  | -1.493328 | 0.638359  |
| C      | -2.029633 | -0.969089 | -0.669324 | H      | 7.467135  | 0.180072  | 0.579709  | O      | 1.474157  | 1.761785  | -1.028069 |
| H      | -1.777671 | -0.543739 | -1.649808 | O      | 1.124301  | 2.252183  | 0.482978  | H      | 3.773439  | -2.835079 | 0.650660  |
| C      | -2.925954 | 0.011914  | 0.106419  | C      | 1.481638  | 3.588568  | 0.122854  | O      | 2.957904  | 1.410194  | 0.373088  |
| C      | -0.752139 | -1.211971 | 0.128294  | H      | 2.203145  | 3.911676  | 0.871866  | C      | 3.667937  | 2.579826  | -0.042442 |
| H      | -3.885501 | 0.083847  | -0.427666 | H      | 1.928892  | 3.608375  | -0.873453 | H      | 4.511825  | 2.667237  | 0.639702  |
| H      | -3.137731 | -0.452479 | 1.078319  | H      | 0.600978  | 4.234840  | 0.130569  | H      | 4.014917  | 2.469281  | -1.072086 |
| C      | -2.378779 | 1.426163  | 0.329949  | 225    |           |           |           | H      | 3.023244  | 3.458964  | 0.024862  |
| H      | -1.410375 | 1.339764  | 0.844085  | LeuAsn |           |           |           | 227    |           |           |           |
| C      | -2.154913 | 2.181721  | -0.978942 | N      | -2.760067 | -2.255410 | -1.550000 | LeuPhe |           |           |           |
| C      | -3.319979 | 2.209712  | 1.242741  | C      | -2.472259 | -0.957322 | -0.957275 | N      | -3.191276 | -2.441065 | -1.515885 |
| H      | -3.088323 | 2.254252  | -1.550567 | H      | -2.449757 | -0.207420 | -1.759186 | C      | -3.051763 | -1.124422 | -0.911011 |
| H      | -1.804469 | 3.200879  | -0.786226 | C      | -3.478325 | -0.527673 | 0.125456  | H      | -3.196543 | -0.367743 | -1.693335 |
| H      | -1.409336 | 1.701117  | -1.620062 | C      | -1.086965 | -1.074839 | -0.327563 | C      | -4.029012 | -0.862960 | 0.249037  |
| H      | -3.460576 | 1.701394  | 2.202205  | H      | -4.484974 | -0.567957 | -0.317496 | C      | -1.623219 | -1.048613 | -0.383551 |
| H      | -2.931614 | 3.213147  | 1.446151  | H      | -3.446589 | -1.293937 | 0.910929  | H      | -5.048766 | -1.032257 | -0.128475 |
| H      | -4.306946 | 2.324266  | 0.778218  | C      | -3.272432 | 0.854415  | 0.755401  | H      | -3.837893 | -1.635527 | 1.005204  |
| O      | -0.772466 | -1.873816 | 1.160421  | H      | -2.251521 | 0.896012  | 1.161884  | C      | -3.970948 | 0.518541  | 0.909983  |



|        |           |           |           |        |           |           |           |        |           |           |            |
|--------|-----------|-----------|-----------|--------|-----------|-----------|-----------|--------|-----------|-----------|------------|
| C      | 3.494310  | -0.933110 | 0.144004  | H      | -4.362300 | 2.342156  | -0.447862 | H      | 4.103601  | -0.163568 | 0.367137   |
| O      | 1.007848  | 2.013276  | -1.376285 | H      | -3.464136 | 1.217028  | -1.462648 | H      | 3.279067  | -0.615944 | -1.126850  |
| H      | 3.949010  | 0.025253  | -0.141312 | H      | -4.714711 | 0.148915  | 2.552195  | C      | 2.701695  | 1.311929  | -0.342199  |
| C      | 3.485382  | -1.015027 | 1.669298  | H      | -5.051176 | 1.754561  | 1.884719  | H      | 1.716705  | 1.314916  | -0.831076  |
| C      | 4.346113  | -2.052610 | -0.452218 | H      | -5.946068 | 0.347079  | 1.296710  | C      | 2.578225  | 2.068062  | 0.979835   |
| H      | 2.956494  | -1.913402 | 2.008764  | O      | -0.896068 | -1.801400 | 0.919322  | C      | 3.683928  | 2.021983  | -1.271594  |
| H      | 4.507348  | -1.061191 | 2.059738  | H      | -3.557565 | -3.207326 | -1.184905 | H      | 3.529302  | 2.053308  | 1.525961   |
| H      | 3.001643  | -0.144731 | 2.121959  | H      | -2.302159 | -3.361101 | -0.145005 | H      | 2.312328  | 3.115912  | 0.806745   |
| H      | 4.381058  | -1.994140 | -1.545342 | N      | -0.616634 | -0.086505 | -0.526675 | H      | 1.811598  | 1.644880  | 1.636503   |
| H      | 5.374527  | -2.004936 | -0.079757 | H      | -0.959228 | 0.450428  | -1.310746 | H      | 3.757832  | 1.513207  | -2.238194  |
| H      | 3.940259  | -3.035104 | -0.183991 | C      | 0.632395  | 0.340744  | 0.053928  | H      | 3.377107  | 3.056529  | -1.457657  |
| O      | 2.369459  | 1.982550  | 0.411901  | H      | 0.555211  | 0.270136  | 1.145263  | H      | 4.687828  | 2.048400  | -0.830577  |
| C      | 2.826245  | 3.284868  | 0.039846  | C      | 1.800583  | -0.554452 | -0.413653 | O      | 0.787630  | -1.818296 | -1.162601  |
| H      | 3.559794  | 3.566387  | 0.794028  | C      | 0.825428  | 1.790155  | -0.347496 | H      | 3.631840  | -2.397684 | 1.095311   |
| H      | 3.283145  | 3.262810  | -0.952217 | H      | 1.451962  | -1.584408 | -0.291191 | H      | 2.607032  | -2.873639 | -0.088789  |
| H      | 1.994048  | 3.992344  | 0.029355  | H      | 1.971842  | -0.389548 | -1.484050 | N      | -0.202339 | -0.503721 | 0.391913   |
| 233    |           |           |           | C      | 3.089847  | -0.365045 | 0.373189  | H      | -0.145303 | -0.031300 | 1.283160   |
| LeuLys |           |           |           | O      | 0.241993  | 2.320903  | -1.266189 | C      | -1.494769 | -0.504353 | -0.248703  |
| N      | -2.582492 | -2.976643 | -0.987094 | H      | 3.459890  | 0.661109  | 0.290994  | H      | -1.371698 | -0.436386 | -1.332769  |
| C      | -2.670517 | -1.552980 | -0.696786 | H      | 2.912854  | -0.577446 | 1.434362  | C      | -2.246776 | -1.800958 | 0.077726   |
| H      | -2.765906 | -1.011065 | -1.647131 | S      | 4.354537  | -1.507311 | -0.260054 | C      | -2.256739 | 0.696989  | 0.274583   |
| C      | -3.836675 | -1.176350 | 0.234090  | C      | 5.714168  | -1.082354 | 0.851861  | H      | -1.633419 | -2.625503 | -0.308842  |
| C      | -1.354850 | -1.175986 | -0.021926 | H      | 5.456141  | -1.290531 | 1.894034  | H      | -2.307009 | -1.893603 | 1.173709   |
| H      | -4.762522 | -1.156984 | -0.212052 | H      | 6.565307  | -1.707170 | 0.572727  | O      | -3.517882 | -1.740916 | -0.522000  |
| H      | -3.680431 | -1.721123 | 1.174266  | H      | 6.003037  | -0.032598 | 0.747623  | O      | -2.108313 | 1.134334  | 1.395765   |
| C      | -4.031192 | 0.313962  | 0.534950  | O      | 1.729812  | 2.408377  | 0.415473  | H      | -3.931398 | -2.603600 | -0.429465  |
| H      | -3.087503 | 0.706636  | 0.940561  | C      | 1.993566  | 3.768087  | 0.058169  | O      | -3.099874 | 1.194421  | -0.622683  |
| C      | -4.381830 | 1.119725  | -0.715029 | H      | 2.744329  | 4.118085  | 0.765264  | C      | -3.908681 | 2.275947  | -0.158202  |
| C      | -5.107750 | 0.493906  | 1.603315  | H      | 2.369268  | 3.829565  | -0.965653 | H      | -4.528302 | 2.565285  | -1.005770  |
| H      | -5.299361 | 0.736795  | -1.178214 | H      | 1.082857  | 4.365894  | 0.136934  | H      | -4.531441 | 1.953656  | 0.679541   |
| H      | -4.550544 | 2.172677  | -0.466921 | 235    |           |           |           | H      | -3.283675 | 3.111371  | 0.166031   |
| H      | -3.590672 | 1.089201  | -1.470712 | LeuPro |           |           |           | 237    |           |           |            |
| H      | -4.850906 | -0.041256 | 2.523214  | N      | -0.790028 | -1.518139 | 2.062593  | LeuTyr |           |           |            |
| H      | -5.244550 | 1.550901  | 1.854749  | C      | -1.033337 | -0.758928 | 0.840118  | N      | -3.554577 | -2.527223 | -1.376376  |
| H      | -6.073089 | 0.109357  | 1.252220  | H      | -0.476995 | -1.247972 | 0.032757  | C      | -3.413561 | -1.188420 | -0.822080  |
| O      | -0.930822 | -1.819883 | 0.931459  | C      | -2.526353 | -0.796595 | 0.513330  | H      | -3.558581 | -0.462216 | -1.632775  |
| H      | -3.507493 | -3.342643 | -1.189401 | C      | -0.597555 | 0.699538  | 1.021340  | C      | -4.389514 | -0.881456 | 0.327514   |
| H      | -2.253540 | -3.436371 | -0.141152 | H      | -2.844305 | -1.845677 | 0.556816  | C      | -1.984279 | -1.094749 | -0.298497  |
| N      | -0.715250 | -0.090750 | -0.511053 | H      | -3.041517 | -0.264994 | 1.322774  | H      | -5.409924 | -1.064264 | -0.041976  |
| H      | -1.065577 | 0.415022  | 0.1312124 | C      | -2.933072 | -0.179503 | -0.828034 | H      | -4.198017 | -1.624015 | 1.113015   |
| C      | 0.517489  | 0.390432  | 0.067308  | H      | -2.506775 | 0.833558  | -0.882176 | C      | -4.328234 | 0.524939  | 0.933218   |
| H      | 0.444986  | 0.321338  | 1.158516  | C      | -2.414961 | -0.983335 | -2.019911 | H      | -3.298731 | 0.703676  | 1.275854   |
| C      | 1.722408  | -0.452462 | -0.397847 | C      | -4.452272 | -0.043295 | -0.903414 | C      | -4.687558 | 1.613804  | -0.076652  |
| C      | 0.647234  | 1.844085  | -0.339643 | H      | -2.824572 | -2.000595 | -2.005796 | C      | -5.245365 | 0.607113  | 2.151731   |
| H      | 1.434925  | -1.493480 | -0.215779 | H      | -2.711240 | -0.519517 | -2.966806 | H      | -5.693034 | 1.450344  | -0.483510  |
| H      | 1.832229  | -0.334191 | -1.483739 | H      | -1.323253 | -1.071245 | -2.026273 | H      | -4.678567 | 2.601570  | 0.395542   |
| C      | 3.039981  | -0.160294 | 0.310676  | H      | -4.836058 | 0.574635  | -0.085491 | H      | -3.990694 | 1.653641  | -0.919829  |
| O      | 0.088806  | 2.330020  | -1.298760 | H      | -4.765443 | 0.413650  | -1.848188 | H      | -4.977883 | -0.141669 | 2.904355   |
| H      | 3.352368  | 0.874545  | 0.125718  | H      | -4.934461 | -1.025933 | -0.834176 | H      | -5.191122 | 1.593728  | 0.932667   |
| H      | 2.891071  | -0.242127 | 1.396169  | O      | -1.178412 | 1.410360  | 1.834574  | H      | -6.289740 | 0.433803  | 1.864969   |
| C      | 4.147777  | -1.115168 | -0.121204 | H      | 0.210838  | -1.524080 | 2.246212  | O      | -1.535278 | -1.948733 | 0.458981   |
| H      | 3.862645  | -2.152904 | 0.088844  | H      | -1.212512 | -0.997254 | 2.828391  | H      | -4.538217 | -2.739844 | -1.509861  |
| H      | 4.282502  | -1.047777 | -1.211087 | N      | 0.444433  | 1.189548  | 0.290950  | H      | -3.195809 | -3.180161 | -0.683537  |
| C      | 5.477953  | -0.832824 | 0.562577  | C      | 0.844178  | 2.584592  | 0.442554  | N      | -1.266188 | -0.016630 | -0.684771  |
| H      | 5.757710  | 0.221840  | 0.379208  | C      | 1.293169  | 0.466382  | -0.636034 | H      | -1.623815 | 0.648777  | -1.355456  |
| H      | 5.347685  | -0.930527 | 1.648029  | H      | 1.478612  | 2.710750  | 1.330343  | C      | 0.089213  | 0.184975  | -0.235587  |
| N      | 6.483759  | -1.799610 | 0.145074  | H      | -0.044185 | 3.203843  | 0.579673  | H      | 0.154075  | -0.060749 | 0.828688   |
| H      | 6.690981  | -1.671983 | -0.840987 | C      | 1.614054  | 2.852476  | -0.843152 | C      | 1.078561  | -0.722715 | -1.011874  |
| H      | 7.353427  | -1.635092 | 0.640959  | C      | 2.327316  | 1.524787  | -1.088093 | C      | 0.413371  | 1.648597  | -0.445935  |
| O      | 1.464920  | 2.523846  | 0.467158  | H      | 0.731231  | 0.095181  | -1.502348 | H      | 0.650319  | -1.728430 | -0.953603  |
| H      | 1.667450  | 3.892521  | 0.108383  | C      | 2.011596  | -0.710575 | 0.002533  | H      | 1.067211  | -0.420559 | -2.065095  |
| H      | 2.351843  | 4.294587  | 0.854173  | H      | 2.306817  | 3.693494  | -0.758288 | C      | 2.480346  | -0.723848 | -0.469515  |
| H      | 2.099954  | 3.968114  | -0.891987 | H      | 0.915770  | 3.066704  | -1.659763 | O      | -0.118240 | 2.338764  | -1.289293  |
| H      | 0.719527  | 4.435135  | 0.124132  | H      | 3.216451  | 1.462261  | -0.450366 | C      | 3.517595  | -0.056021 | -1.118696  |
| 234    |           |           |           | H      | 2.642831  | 1.364430  | -2.120856 | C      | 2.778353  | -1.399014 | 0.719985   |
| LeuMet |           |           |           | O      | 2.157987  | -0.891931 | 1.188118  | H      | 3.317636  | 0.468559  | -2.050354  |
| N      | -2.616648 | -2.882656 | -0.985905 | O      | 2.504860  | -1.514712 | -0.946455 | C      | 4.810752  | -0.053557 | -0.604381  |
| C      | -2.640098 | -1.457766 | -0.690953 | C      | 3.245795  | -2.637699 | -0.463928 | C      | 4.060221  | -1.403150 | 1.248527   |
| H      | -2.720878 | -0.909155 | -1.638751 | H      | 2.611167  | -3.274843 | 0.156374  | H      | 1.987297  | -1.938714 | 1.236144   |
| C      | -3.778758 | -1.032040 | 0.252843  | H      | 3.578331  | -3.175894 | -1.350587 | H      | 5.606979  | 0.468231  | -1.0132172 |
| C      | -1.302733 | -1.140580 | -0.029638 | H      | 4.101598  | -2.307182 | 0.129223  | C      | 5.085812  | -0.726570 | 0.585209   |
| H      | -4.725009 | -1.387149 | -0.182480 | 236    |           |           |           | H      | 4.290632  | -1.930978 | 2.168220   |
| H      | -3.635241 | -1.581628 | 1.192224  | LeuSer |           |           |           | O      | 6.324558  | -0.763905 | 1.140984   |
| C      | -3.907345 | 0.465754  | 0.552351  | N      | 2.655205  | -2.416481 | 0.818831  | H      | 6.933867  | -0.275812 | 0.578143   |
| H      | -2.943028 | 0.820461  | 0.944432  | C      | 2.169948  | -1.055317 | 0.641342  | O      | 1.368159  | 2.072310  | 0.377835   |
| C      | -4.241695 | 1.282435  | -0.695063 | H      | 1.982668  | -0.623620 | 1.633471  | C      | 1.792723  | 3.420921  | 0.176299   |
| C      | -4.961271 | 0.692331  | 1.634331  | C      | 3.130038  | -0.146477 | -0.145806 | H      | 2.194622  | 3.549189  | -0.831509  |
| H      | -5.181234 | 0.937103  | -1.143317 | C      | 0.855263  | -1.172398 | -0.123756 | H      | 0.956523  | 4.110354  | 0.313721   |
|        |           |           |           |        |           |           |           | H      | 2.566119  | 3.599923  | 0.921738   |

|        |           |           |           |        |           |           |           |        |           |           |           |
|--------|-----------|-----------|-----------|--------|-----------|-----------|-----------|--------|-----------|-----------|-----------|
| 238    |           |           |           | C      | 4.240885  | -0.531241 | 0.077116  | O      | 0.203189  | 2.241567  | 0.848603  |
| LeuThr |           |           |           | C      | 3.063060  | -2.764977 | 1.188983  | H      | 1.875569  | 3.894242  | 0.217890  |
| N      | 2.936064  | -2.466471 | -0.010092 | H      | 1.220552  | -2.135632 | 0.256082  | H      | 1.417051  | 4.021702  | -1.325709 |
| C      | 2.221088  | -1.227415 | 0.256202  | H      | 5.469110  | 1.038308  | -0.645300 | N      | 0.012953  | 0.683927  | -0.778137 |
| H      | 2.092851  | -1.135394 | 1.342085  | C      | 5.037067  | -1.380064 | 0.847483  | H      | 0.428317  | 0.193564  | -1.559182 |
| C      | 3.062488  | -0.052125 | -0.261235 | C      | 4.427640  | -2.496253 | 1.399331  | C      | -1.183850 | 0.097903  | -0.230761 |
| C      | 0.851684  | -1.213848 | -0.427728 | H      | 2.623411  | -3.652418 | 1.634688  | H      | -1.064139 | -0.058895 | 0.848313  |
| H      | 4.078650  | -0.201006 | 0.125047  | H      | 6.092357  | -1.177670 | 1.008564  | C      | -2.406532 | 1.014203  | -0.432287 |
| H      | 3.123804  | -0.153547 | -1.353469 | H      | 5.017792  | -3.178440 | 2.004464  | C      | -1.370144 | -1.247399 | -0.907881 |
| C      | 2.574955  | 1.357382  | 0.090384  | O      | 1.033135  | 2.509023  | 0.794296  | H      | -2.126012 | 1.981573  | -0.001648 |
| H      | 1.529561  | 1.464983  | -0.230014 | C      | 1.182230  | 3.889224  | 1.128165  | H      | -2.624100 | 1.147254  | -1.494032 |
| C      | 2.632190  | 1.632364  | 1.592392  | H      | 1.297713  | 4.493875  | 0.225369  | C      | -3.666337 | 0.544615  | 0.250287  |
| C      | 3.402617  | 2.393879  | -0.667067 | H      | 0.309870  | 4.246369  | 1.680538  | O      | -0.663837 | -1.663614 | -1.799074 |
| H      | 3.660117  | 1.542758  | 1.964171  | H      | 2.077149  | 3.947019  | 1.746180  | O      | -4.749081 | 0.452497  | -0.275740 |
| H      | 2.279368  | 2.643860  | 1.816079  | 240    |           |           |           | O      | -2.417884 | -1.902792 | -0.413237 |
| H      | 2.012432  | 0.940905  | 2.173478  | LeuVal |           |           |           | C      | -2.709298 | -3.154777 | -1.039708 |
| H      | 3.338441  | 2.242300  | -1.749675 | N      | -2.615931 | -2.515043 | -0.776926 | H      | -3.602871 | -3.530110 | -0.543658 |
| H      | 3.059780  | 3.410397  | -0.448188 | C      | -2.244606 | -1.116469 | -0.614225 | H      | -2.893354 | -3.013012 | -2.106718 |
| H      | 4.460447  | 2.331146  | -0.384272 | H      | -2.073106 | -0.687252 | -1.610287 | H      | -1.875275 | -3.848085 | -0.910136 |
| O      | 0.698390  | -1.700453 | -1.542242 | C      | -3.290594 | -0.276673 | 0.138890  | O      | -3.441630 | 0.274927  | 1.546218  |
| H      | 2.433670  | -3.239512 | 0.417887  | C      | -0.940992 | -1.113241 | 0.178456  | C      | -4.581443 | -0.178327 | 2.271226  |
| H      | 2.869428  | -2.633428 | -1.012848 | H      | -4.248674 | -0.378095 | -0.392934 | H      | -4.955715 | -1.115046 | 1.850080  |
| N      | -0.168015 | -0.642145 | 0.265904  | H      | -3.421927 | -0.742937 | 1.123952  | H      | -4.242196 | -0.329057 | 3.295602  |
| H      | 0.026586  | -0.133594 | 1.116064  | C      | -2.983772 | 1.213803  | 0.322061  | H      | -5.381336 | 0.565159  | 2.237419  |
| C      | -1.441635 | -0.390545 | -0.351301 | H      | -2.014098 | 1.301847  | 0.833448  | 242    |           |           |           |
| H      | -1.323538 | -0.581227 | -1.424581 | C      | -2.888783 | 1.960207  | -1.007913 | LysGlu |           |           |           |
| C      | -2.558112 | -1.301464 | 0.176955  | C      | -4.040573 | 1.856696  | 1.217989  | N      | 2.295157  | -2.963009 | -2.160090 |
| C      | -1.809941 | 1.069784  | -0.141557 | H      | -3.822321 | 1.861886  | -1.575326 | C      | 2.041831  | -2.181065 | -0.958071 |
| H      | -3.459864 | -1.069156 | -0.409886 | H      | -2.711721 | 3.028195  | -0.844367 | H      | 1.958090  | -2.804868 | -0.045135 |
| C      | -2.213697 | -2.772386 | 0.031630  | H      | -2.074829 | 1.592029  | -1.640227 | C      | 3.175252  | -1.177323 | -0.731249 |
| O      | -2.740282 | -0.930178 | 1.532593  | H      | -4.097994 | 1.356169  | 2.190028  | C      | 0.633241  | -1.603219 | -1.133722 |
| O      | -1.157593 | 1.859545  | 0.496602  | H      | -3.820281 | 2.914523  | 1.395820  | H      | 4.109494  | -1.676737 | 1.017170  |
| H      | -1.335874 | -3.010679 | 0.637697  | H      | -5.032467 | 1.798526  | 0.753489  | H      | 3.076125  | -0.341366 | -1.436683 |
| H      | -3.049199 | -3.395968 | 0.369173  | O      | -0.851105 | -1.720880 | 1.239792  | C      | 3.319494  | -0.677406 | 0.705607  |
| H      | -1.994476 | -3.027856 | -1.008662 | H      | -3.586273 | -2.579058 | -1.068580 | C      | 2.380325  | -0.234106 | 1.063898  |
| H      | -3.408966 | -1.507877 | 1.912968  | H      | -2.547073 | -2.953260 | 0.138704  | H      | 3.501726  | -1.540329 | 1.361916  |
| O      | -2.952639 | -1.373075 | -0.764636 | N      | 0.078196  | -0.393172 | -0.340078 | C      | 4.445885  | 0.336522  | 0.869338  |
| C      | -3.392104 | 2.720932  | -0.594057 | H      | -0.024195 | 0.121122  | -1.203507 | H      | 5.385804  | -0.104834 | 0.505979  |
| H      | -4.317270 | 2.805158  | -1.163023 | C      | 1.335447  | -0.241684 | 0.353210  | H      | 4.260453  | 1.218968  | 0.245140  |
| H      | -3.569751 | 2.933383  | 0.462752  | H      | 1.133791  | -0.097670 | 1.421365  | C      | 4.634012  | 0.796798  | 2.307903  |
| H      | -2.642754 | 3.419419  | -0.973710 | C      | 2.230521  | -1.502563 | 0.207761  | H      | 3.704820  | 1.266322  | 2.655506  |
| 239    |           |           |           | C      | 1.982873  | 1.010779  | -0.203561 | H      | 4.790552  | -0.090420 | 2.949999  |
| LeuTrp |           |           |           | H      | 1.555285  | -2.320409 | 0.485905  | N      | 5.694627  | 1.791065  | 2.392374  |
| N      | -3.388140 | -1.956869 | -2.242525 | C      | 2.688469  | -1.714608 | -1.231069 | H      | 5.778115  | 2.132126  | 3.344202  |
| C      | -3.366612 | -0.931495 | -1.209220 | C      | 3.399344  | -1.510534 | 1.187092  | H      | 6.585822  | 1.359121  | 2.167040  |
| H      | -3.728480 | 0.007953  | -1.647482 | O      | 1.655488  | 1.537438  | -1.244797 | O      | -0.276290 | -2.320392 | -1.538120 |
| C      | -4.204036 | -1.278940 | 0.034209  | H      | 3.391830  | -0.936166 | -1.550292 | H      | 1.438603  | -3.460627 | -2.388826 |
| C      | -1.906942 | -0.775274 | -0.795985 | H      | 3.198288  | -2.677663 | -1.329926 | H      | 3.011600  | -3.655985 | -1.972747 |
| H      | -5.228048 | -1.500282 | -0.302621 | H      | 1.842849  | -1.712729 | -1.925210 | N      | 0.426706  | -0.308025 | -0.806243 |
| H      | -3.794800 | -2.212309 | 0.442053  | H      | 3.057787  | -1.365100 | 2.217044  | H      | 1.187716  | 0.319853  | -0.589294 |
| C      | -4.266490 | -0.224516 | 1.144723  | H      | 3.916880  | -2.473772 | 1.140268  | C      | -0.866153 | 0.304243  | -0.995031 |
| H      | -3.236483 | 0.009144  | 1.450749  | O      | 4.126964  | -0.725967 | 0.960875  | H      | -1.300954 | -0.062226 | -1.933540 |
| C      | -4.930100 | 1.072376  | 0.683878  | C      | 2.968487  | 1.459910  | 0.575987  | C      | -1.825042 | -0.058716 | 0.156347  |
| C      | -4.995202 | -0.791330 | 2.361484  | C      | 3.647309  | 2.618523  | 0.086047  | C      | -0.625638 | 1.797767  | -1.106071 |
| H      | -5.948426 | 0.880918  | 0.324025  | H      | 4.410654  | 2.848497  | 0.828121  | H      | -1.742828 | -1.140626 | 0.284854  |
| H      | -4.999545 | 1.789403  | 1.508325  | H      | 4.103556  | 2.414677  | -0.885427 | H      | -1.466462 | 0.411365  | 1.080090  |
| H      | -4.379068 | 1.563710  | -0.124142 | H      | 2.950395  | 3.452951  | -0.020193 | C      | -3.286669 | 0.299581  | -0.102674 |
| H      | -4.509357 | -1.700540 | 2.730141  | 241    |           |           |           | O      | 0.408379  | 2.341800  | -0.786926 |
| H      | -5.020904 | -0.066244 | 3.181624  | LysAsp |           |           |           | H      | -3.434613 | 1.370953  | -0.241877 |
| H      | -6.032515 | -1.045229 | 2.111214  | N      | 2.121736  | 3.601055  | -0.726175 | H      | -3.621063 | -0.199616 | -1.021813 |
| O      | -1.239995 | -1.756648 | -0.479793 | C      | 1.984866  | 2.153583  | -0.766323 | C      | -4.214352 | -0.130815 | 1.006433  |
| H      | -4.339312 | -2.284631 | -2.378356 | H      | 2.038359  | 1.830716  | -1.815386 | O      | -5.068409 | 0.562293  | 1.506567  |
| H      | -2.843915 | -2.744207 | -1.897580 | C      | 3.150646  | 1.519463  | 0.001426  | O      | -1.690216 | 2.444552  | -1.582452 |
| N      | -1.415029 | 0.481302  | -0.770653 | C      | 0.655845  | 1.701432  | -0.155117 | C      | -1.544865 | 3.864694  | -1.678802 |
| H      | -1.969945 | 1.275690  | -1.056800 | H      | 4.065362  | 1.990311  | -0.376346 | H      | -2.492023 | 4.230875  | -2.072030 |
| C      | -0.064325 | 0.757516  | -0.347734 | H      | 3.059915  | 1.808321  | 1.057190  | H      | -1.342474 | 4.296433  | -0.696170 |
| H      | 0.169112  | 0.149233  | 0.531831  | C      | 3.252567  | 0.002493  | -0.113711 | H      | -0.723639 | 4.117469  | -2.352972 |
| C      | 0.965005  | 0.419314  | -1.461994 | H      | 2.343916  | -0.469425 | 0.283675  | O      | -3.994531 | -1.406317 | 1.369580  |
| C      | -0.010920 | 2.224136  | 0.020105  | H      | 3.302591  | -0.280035 | -1.175963 | C      | -4.853721 | -1.895309 | 2.396600  |
| H      | 0.625395  | -0.531601 | -1.886338 | C      | 4.466896  | -0.561131 | 0.615792  | H      | -4.547256 | -2.925613 | 2.575103  |
| H      | 0.890832  | 1.171817  | -2.255255 | H      | 5.378158  | -0.085648 | 0.224153  | H      | -4.746423 | -1.299829 | 3.306709  |
| C      | 2.367533  | 0.278146  | -0.978767 | H      | 4.422541  | -0.307349 | 1.681775  | H      | -5.898056 | -1.856590 | 2.076695  |
| O      | -0.811521 | 3.046644  | -0.372365 | C      | 4.596126  | -2.071883 | 0.485267  | 243    |           |           |           |
| C      | 3.430555  | 1.104289  | -1.225158 | H      | 3.695871  | -2.543442 | 0.900186  | LysAla |           |           |           |
| C      | 2.274158  | -1.922057 | 0.423031  | H      | 4.616083  | -2.337782 | -0.588321 | N      | -0.939494 | 3.450570  | -1.071580 |
| C      | 2.864944  | -0.782474 | -0.143920 | N      | 5.742642  | -2.555169 | 1.242592  | C      | -0.988960 | 2.327703  | -0.144707 |
| H      | 3.474534  | 2.009986  | -1.814892 | H      | 5.799246  | -3.566385 | 1.181817  | H      | -1.399821 | 2.604129  | 0.847235  |
| N      | 4.554497  | 0.626330  | -0.592332 | H      | 6.598590  | -2.198994 | 0.827621  | C      | -1.867504 | 1.211263  | -0.713373 |

|        |           |           |           |        |           |           |            |        |           |           |           |
|--------|-----------|-----------|-----------|--------|-----------|-----------|------------|--------|-----------|-----------|-----------|
| C      | 0.473126  | 1.979520  | 0.155013  | H      | -8.057703 | 0.225176  | -1.460447  | C      | -1.842901 | 1.285159  | 0.544254  |
| H      | -2.727138 | 1.693753  | -1.195941 | O      | -1.121901 | -1.631350 | 2.312902   | H      | -2.562936 | -1.951894 | -0.366314 |
| H      | -1.337958 | 0.700592  | -1.529203 | C      | -1.032232 | -2.968167 | 2.812481   | H      | -3.151015 | -1.082057 | 1.072779  |
| C      | -2.394810 | 0.215105  | 0.318403  | H      | -1.956334 | -3.139001 | 3.362874   | S      | -4.294032 | -0.390520 | -0.969560 |
| H      | -1.566716 | -0.263735 | 0.858236  | H      | -0.937274 | -3.679918 | 1.989325   | O      | -1.278594 | 1.650647  | 1.551849  |
| H      | -2.960635 | 0.767173  | 1.082625  | H      | -0.166775 | -3.071623 | 3.470776   | H      | -4.754248 | -1.617455 | -1.267753 |
| C      | -3.283506 | -0.860754 | -0.294376 |        |           |           |            | O      | -2.733373 | 2.010666  | -0.123973 |
| H      | -4.112363 | -0.380655 | -0.835557 | 245    |           |           |            | C      | -3.049124 | 3.282201  | 0.448997  |
| H      | -2.726272 | -1.440928 | -1.039860 | LysAsn |           |           |            | H      | -3.793644 | 3.723337  | -0.211410 |
| C      | -3.853220 | -1.824133 | 0.737211  | N      | 1.734053  | 3.583568  | -0.927970  | H      | -3.453371 | 3.156686  | 1.455837  |
| H      | -3.023619 | -2.328318 | 1.249353  | C      | 1.618392  | 2.134355  | -0.881319  | H      | -2.155729 | 3.908600  | 0.498354  |
| H      | -4.386924 | -1.242881 | 1.512583  | H      | 1.632553  | 1.752625  | -1.911758  |        |           |           |           |
| N      | -4.665316 | -2.845900 | 0.091103  | C      | 2.826402  | 1.560370  | -0.130451  | 247    |           |           |           |
| H      | -5.000334 | -3.511809 | 0.779315  | C      | 0.322601  | 1.698508  | -0.188813  | LysPhe |           |           |           |
| H      | -5.492317 | -2.417852 | -0.314514 | H      | 3.715849  | 2.025380  | -0.570870  | N      | -2.376206 | -3.507722 | -1.075438 |
| O      | 1.264381  | 2.872789  | 0.440586  | H      | 2.774688  | 1.903323  | 0.911659   | C      | -2.320622 | -2.056877 | -0.977343 |
| H      | -0.205866 | 4.078004  | -0.752498 | C      | 2.952856  | 0.041192  | -0.170008  | H      | -2.468928 | -1.637363 | -1.982133 |
| H      | -1.814793 | 3.961882  | -1.035435 | H      | 2.075967  | -0.425262 | 0.298363   | C      | -3.456921 | -1.574185 | -0.069520 |
| N      | 0.842552  | 0.680150  | 0.122100  | H      | 2.954946  | -0.297179 | -1.217123  | C      | -0.977680 | -1.586945 | -0.413981 |
| H      | 0.241443  | -0.033744 | -0.265302 | C      | 4.214398  | -0.461510 | 0.523087   | H      | -4.373846 | -2.052001 | -0.432953 |
| C      | 2.217583  | 0.297791  | 0.336307  | H      | 5.094736  | 0.004290  | 0.056099   | H      | -3.273250 | -1.967509 | 0.939300  |
| H      | 2.870821  | 0.999371  | -0.198938 | H      | 4.222868  | -0.148346 | 1.574026   | C      | -3.637616 | -0.061496 | -0.008892 |
| C      | 2.608025  | 0.317056  | 1.816175  | C      | 4.362793  | -1.975289 | 0.469795   | H      | -2.723817 | 0.413198  | 0.373286  |
| C      | 2.398063  | -1.078825 | -0.270263 | H      | 3.500116  | -2.435441 | 0.968476   | H      | -3.781631 | 0.330629  | -1.026667 |
| H      | 1.982281  | -0.374462 | 2.388027  | H      | 4.318316  | -2.301677 | -0.5786214 | C      | -4.817362 | 0.330594  | 0.863672  |
| H      | 3.656396  | 0.036762  | 1.940731  | N      | 5.564665  | -2.397461 | 1.176308   | H      | -5.732987 | -0.125852 | 0.485979  |
| H      | 2.460451  | 1.329185  | 2.197127  | H      | 5.632180  | -3.409814 | 1.174868   | H      | -4.680129 | -0.014299 | 1.887995  |
| O      | 1.499851  | -1.745533 | -0.734943 | H      | 6.385503  | -2.058603 | 0.683272   | C      | -5.026605 | 1.859076  | 0.916058  |
| O      | 3.670966  | -1.473613 | -0.218416 | O      | -0.113239 | 2.315074  | 0.777849   | H      | -4.121556 | 2.330785  | 1.320187  |
| C      | 3.924782  | -2.771890 | -0.758345 | H      | 1.513938  | 3.923277  | 0.007181   | H      | -5.138870 | 2.241262  | -0.115968 |
| H      | 4.994432  | -2.937685 | -0.637363 | H      | 0.998196  | 3.957336  | -1.521262  | N      | -6.135538 | 2.191021  | 1.800335  |
| H      | 3.354309  | -3.530665 | -0.217673 | N      | -0.303548 | 0.614478  | -0.706756  | H      | -6.244422 | 3.198029  | 1.859833  |
| H      | 3.647364  | -2.808012 | -1.814388 | H      | 0.144192  | 0.056329  | -1.422398  | H      | -7.001936 | 1.836002  | 1.406553  |
|        |           |           |           | C      | -1.429120 | -0.014490 | -0.055336  | O      | -0.450246 | -2.169907 | 0.529501  |
| 244    |           |           |           | H      | -1.212846 | -0.204558 | 1.007031   | H      | -2.052580 | -3.875631 | -0.182309 |
| LysArg |           |           |           | C      | -2.691026 | 0.852609  | -0.070989  | H      | -1.691963 | -3.824963 | -1.756787 |
| N      | 3.113150  | 3.464027  | 0.956347  | C      | -1.620150 | -1.359277 | -0.732327  | N      | -0.409535 | -0.508897 | -1.003337 |
| C      | 2.749847  | 2.346179  | 0.096950  | H      | -2.363259 | 1.874016  | 0.153821   | H      | -0.875833 | 0.007791  | -1.736706 |
| H      | 2.631803  | 2.637996  | -0.966414 | H      | -3.168850 | 0.853495  | -1.056563  | C      | 0.806501  | 0.065248  | -0.485535 |
| C      | 3.825315  | 1.257914  | 0.162099  | C      | -3.660547 | 0.450740  | 1.029003   | H      | 0.754496  | 0.091025  | 0.609172  |
| C      | 1.333665  | 1.942387  | 0.522778  | O      | -0.828451 | -1.839239 | -1.515384  | C      | 2.053539  | -0.770063 | -0.880745 |
| H      | 4.794207  | 1.768598  | 0.229457  | O      | -3.298450 | -0.093492 | 2.056828   | C      | 0.890626  | 1.482880  | -1.012090 |
| H      | 3.733049  | 0.703402  | 1.105618  | N      | -4.959455 | 0.775653  | 0.792843   | H      | 1.730731  | -1.813448 | -0.816977 |
| C      | 3.867667  | 0.310269  | -1.036109 | H      | -5.614276 | 0.652505  | 1.547899   | H      | 2.311714  | -0.569056 | -1.926488 |
| H      | 2.896835  | -0.181628 | -1.186436 | H      | -5.235323 | 1.325606  | -0.001800  | C      | 3.240232  | -0.567618 | 0.021542  |
| H      | 4.036757  | 0.901849  | -1.947244 | O      | -2.754684 | -1.948575 | -0.367007  | O      | 0.185862  | 1.919870  | -1.896594 |
| C      | 4.952453  | -0.752828 | -0.908029 | C      | -2.982580 | -3.239375 | -0.934361  | C      | 4.392839  | 0.088746  | -0.410728 |
| H      | 5.924344  | -0.260303 | -0.755530 | H      | -3.936690 | -3.573042 | -0.529239  | C      | 3.195510  | -1.057781 | 1.331040  |
| H      | 4.779396  | -1.370650 | -0.018593 | H      | -3.025135 | -3.177704 | -2.024351  | H      | 4.441382  | 0.469637  | -1.428242 |
| C      | 5.042101  | -1.669970 | -2.119521 | H      | -2.183197 | -3.927357 | -0.650065  | C      | 5.479069  | 0.256098  | 0.444212  |
| H      | 4.082712  | -2.187989 | -2.245326 |        |           |           |            | C      | 4.276633  | -0.887220 | 2.188452  |
| H      | 5.181104  | -1.052575 | -3.026934 | 246    |           |           |            | H      | 2.303593  | -1.582873 | 1.667544  |
| N      | 6.071993  | -2.680282 | -1.920448 | LysCys |           |           |            | H      | 6.371421  | 0.765215  | 0.090676  |
| C      | 6.088679  | -3.320679 | -2.707167 | N      | 1.570574  | -3.618642 | 0.716902   | C      | 5.422688  | -0.229104 | 1.747130  |
| H      | 6.985001  | -2.235892 | -1.897606 | C      | 1.440878  | -2.170332 | 0.744191   | H      | 4.228094  | -1.275582 | 3.201879  |
| O      | 0.487282  | 2.806895  | 0.730118  | H      | 1.394186  | -1.847297 | 1.793492   | H      | 6.269535  | -0.099809 | 2.414957  |
| H      | 2.290349  | 4.053121  | 1.054856  | C      | 2.680956  | -1.545920 | 0.093443   | O      | 1.847650  | 2.178941  | -0.404896 |
| H      | 3.835873  | 4.017960  | 0.509844  | C      | 0.181535  | -1.707370 | 0.006529   | C      | 2.027771  | 3.514153  | -0.879784 |
| N      | 1.049658  | 0.626315  | 0.628726  | H      | 3.550708  | -2.016090 | 0.566256   | H      | 2.855535  | 3.921410  | -0.301188 |
| H      | 1.764634  | -0.084308 | 0.566394  | H      | 2.696464  | -1.844937 | -0.963246  | H      | 2.265769  | 3.514318  | -1.946063 |
| C      | -0.254976 | 0.180473  | 1.057933  | C      | 2.777699  | -0.028074 | 0.202119   | H      | 1.120695  | 4.101999  | -0.720815 |
| H      | -0.605681 | 0.832390  | 1.867660  | H      | 1.921139  | 0.442568  | -0.298912  |        |           |           |           |
| C      | -1.279120 | 0.246675  | -0.092759 | H      | 2.712610  | 0.268282  | 1.259728   | 248    |           |           |           |
| C      | -0.074008 | -1.226083 | 1.594014  | C      | 4.068180  | 0.520142  | -0.396884  | LysGly |           |           |           |
| H      | -1.130796 | 1.228619  | -0.554472 | H      | 4.927989  | 0.051722  | 0.104252   | N      | 1.218839  | 3.528083  | -0.591923 |
| H      | -1.018276 | -0.507385 | -0.846393 | H      | 4.143254  | 0.244991  | -1.455786  | C      | 0.941681  | 2.099611  | -0.614177 |
| C      | -2.736351 | 0.107708  | 0.329301  | C      | 4.187164  | 2.033150  | -0.283163  | H      | 0.711942  | 1.808154  | -1.648710 |
| O      | 0.903910  | -1.909733 | 1.383588  | H      | 3.343364  | 2.497318  | -0.809933  | C      | 2.192771  | 1.341926  | -0.156688 |
| H      | -2.924223 | -0.866184 | 0.791353  | H      | 4.083254  | 2.321881  | 0.779689   | C      | -0.237701 | 1.748725  | 0.297019  |
| H      | -2.953729 | 0.864623  | 1.097447  | N      | 5.415777  | 2.498250  | -0.912057  | H      | 3.028849  | 1.726773  | -0.751714 |
| C      | -3.678575 | 0.289077  | -0.852395 | H      | 5.467333  | 3.510671  | -0.870184  | H      | 2.393172  | 1.619800  | 0.886745  |
| H      | -3.480614 | 1.247420  | -1.358200 | H      | 6.216428  | 2.152671  | -0.391289  | C      | 2.110579  | -0.175527 | -0.279714 |
| H      | -3.521241 | -0.487858 | -1.605458 | O      | -0.176314 | -2.244015 | -1.036240  | H      | 1.288431  | -0.559333 | 0.339201  |
| N      | -5.058333 | 0.184627  | -0.425577 | H      | 1.418046  | -3.910208 | -0.247170  | H      | 1.862284  | -0.445087 | -1.317253 |
| H      | -5.310483 | 0.811812  | 0.324966  | H      | 0.807098  | -4.034504 | 1.243220   | C      | 3.406387  | -0.869357 | 0.124983  |
| C      | -6.041902 | -0.023514 | -1.372320 | N      | -0.507047 | -0.681070 | 0.564237   | H      | 4.231582  | -0.485006 | -0.492460 |
| N      | -5.731069 | -0.236275 | -2.597456 | H      | -0.171154 | -0.204441 | 1.390903   | H      | 3.661302  | -0.625321 | 1.163377  |
| N      | -7.324798 | -0.068179 | -0.835177 | C      | -1.633857 | -0.074122 | -0.099482  | C      | 3.343515  | -2.383735 | -0.012689 |
| H      | -6.555906 | -0.507871 | -3.128190 | H      | -1.415612 | 0.058874  | -1.166286  | H      | 2.539665  | -2.766669 | 0.629378  |
| H      | -7.447546 | 0.262038  | 0.109528  | C      | -2.871950 | -0.979593 | 0.020008   | H      | 3.055782  | -2.636602 | -1.050550 |

|        |           |           |           |        |           |           |           |        |           |           |           |
|--------|-----------|-----------|-----------|--------|-----------|-----------|-----------|--------|-----------|-----------|-----------|
| N      | 4.592681  | -2.990595 | 0.426426  | H      | 4.363219  | -0.014945 | -1.422821 | H      | -0.887925 | 3.865721  | 0.992642  |
| H      | 4.529271  | -4.001459 | 0.366597  | C      | 4.563080  | 1.696265  | -0.155256 |        |           |           |           |
| H      | 5.342514  | -2.716702 | -0.201603 | H      | 3.774505  | 2.267134  | -0.662494 | 252    |           |           |           |
| O      | -0.369311 | 2.273559  | 1.396451  | H      | 4.473466  | 1.936598  | 0.920841  | LysLeu |           |           |           |
| H      | 1.226586  | 3.807810  | 0.387831  | N      | 5.838987  | 2.073879  | -0.748115 | N      | -1.730140 | 3.430885  | -1.243064 |
| H      | 0.433981  | 4.027302  | -1.001714 | H      | 5.989591  | 3.071913  | -0.644432 | C      | -1.671205 | 2.343081  | -0.274848 |
| N      | -1.117904 | 0.832578  | -0.170566 | H      | 6.595086  | 1.620352  | -0.243760 | H      | -1.892238 | 2.673519  | 0.759834  |
| H      | -1.003231 | 0.288276  | -1.068838 | O      | -0.165653 | -2.116154 | -1.188893 | C      | -2.682083 | 1.254865  | -0.640436 |
| C      | -2.230413 | 0.396963  | 0.622968  | H      | 1.232008  | -3.950009 | -0.436042 | C      | -0.195765 | 1.931404  | -0.216700 |
| C      | -2.985399 | -0.665265 | -0.135044 | H      | 0.587240  | -4.073425 | 1.038469  | H      | -3.594695 | 1.761649  | -0.979734 |
| H      | -1.905426 | -0.007639 | 1.589981  | N      | -0.388828 | -0.591436 | 0.468774  | H      | -2.326911 | 0.699187  | -1.518779 |
| H      | -2.909981 | 1.225653  | 0.859020  | H      | -0.002821 | -0.164490 | 1.300030  | C      | -3.054666 | 0.312483  | 0.502951  |
| O      | -2.674850 | -1.072072 | -1.232014 | C      | -1.439948 | 0.143450  | -0.195557 | H      | -2.159090 | -0.164012 | 0.924755  |
| O      | -4.037974 | -1.097387 | 0.559356  | H      | -1.216634 | 0.182679  | -1.268735 | H      | -3.482472 | 0.906312  | 1.323259  |
| C      | -4.814995 | -2.109520 | -0.084145 | C      | -2.819395 | -0.549308 | -0.027321 | C      | -4.046225 | -0.766901 | 0.083565  |
| H      | -4.204585 | -2.993698 | -0.281763 | H      | -1.405527 | 1.550222  | 0.368890  | H      | -4.938126 | -0.290697 | -0.350376 |
| H      | -5.620795 | -2.347412 | 0.608777  | H      | -2.608344 | -1.591121 | -0.302405 | H      | -3.618123 | -1.393530 | -0.708240 |
| H      | -5.218138 | -1.739731 | -1.029773 | C      | -3.289917 | -0.509614 | 1.423327  | C      | -4.471857 | -1.669043 | 1.233045  |
|        |           |           |           | C      | -3.864715 | -0.021767 | -1.014346 | H      | -3.583383 | -2.167130 | 1.642025  |
| 249    |           |           |           | O      | -0.817799 | 1.859761  | 1.382710  | H      | -4.877073 | -1.041590 | 2.049186  |
| LysGln |           |           |           | H      | -3.582588 | 0.504296  | 1.722223  | N      | -5.385132 | -2.701194 | 0.762527  |
| N      | -2.165855 | 3.469253  | -1.115495 | H      | -4.154492 | -1.160755 | 1.576229  | H      | -5.624850 | -3.328268 | 1.523211  |
| C      | -1.947178 | 2.352444  | -0.205213 | H      | -2.500983 | -0.846214 | 2.102683  | H      | -6.256418 | -2.273952 | 0.462690  |
| H      | -2.009906 | 2.646012  | 0.861846  | H      | -4.135024 | 1.008590  | -0.755756 | O      | 0.667741  | 2.790865  | -0.068950 |
| C      | -2.991197 | 1.260667  | -0.447307 | H      | -3.410690 | 0.024430  | -1.032580 | H      | -0.933492 | 4.037944  | -1.068588 |
| C      | -0.476932 | 1.961316  | -0.386691 | C      | -5.120954 | -0.883104 | -1.082199 | H      | -2.569534 | 3.979302  | -1.088623 |
| H      | -3.947978 | 1.765546  | -0.632574 | H      | -5.666250 | -0.889129 | -0.133325 | N      | 0.108602  | 0.619589  | -0.316630 |
| H      | -2.765905 | 0.733019  | -0.383999 | H      | -5.807147 | -0.511007 | -1.849004 | H      | -0.588467 | -0.076885 | -0.537172 |
| C      | -3.181705 | 0.282753  | 0.711136  | H      | -4.875807 | -1.921117 | -1.332615 | H      | 1.482057  | 0.170488  | -0.314707 |
| H      | -2.234546 | -0.211364 | 0.966008  | O      | -2.107655 | 2.410382  | -0.370912 | H      | 2.087290  | 0.903832  | -0.857575 |
| H      | -3.463709 | 0.851240  | 1.608888  | C      | -2.142770 | 3.749650  | 0.127243  | C      | 2.015071  | 0.046305  | 1.127296  |
| C      | -4.239575 | -0.776981 | 0.426046  | H      | -2.746326 | 4.312323  | -0.583593 | C      | 1.508420  | -1.151450 | -1.053231 |
| H      | -5.191459 | -0.282706 | 0.181147  | H      | -2.593310 | 3.778134  | 1.122074  | H      | 1.814241  | 0.192433  | 1.592301  |
| H      | -3.964670 | -1.366375 | -0.457107 | H      | -1.132872 | 4.161775  | 0.185773  | H      | 1.397237  | -0.693846 | 1.652256  |
| C      | -4.457328 | -1.731483 | 1.591428  |        |           |           |           | C      | 3.498406  | -0.290456 | 1.306903  |
| H      | -3.515052 | -2.251990 | 1.804865  | 251    |           |           |           | O      | 0.533202  | -1.846707 | -1.235483 |
| H      | -4.696465 | -1.142626 | 2.496867  | LysHis |           |           |           | H      | 3.689676  | -1.281708 | 0.874910  |
| N      | -5.455202 | -2.736515 | 1.251366  | N      | 2.171995  | -3.693167 | 0.465614  | C      | 4.409560  | 0.713872  | 0.603919  |
| H      | -5.550550 | -3.403112 | 2.010224  | C      | 2.092583  | -2.246510 | 0.597415  | C      | 3.818716  | -0.359002 | 2.799299  |
| H      | -6.363406 | -2.293673 | 1.147965  | H      | 2.092549  | -1.996993 | 1.667845  | H      | 4.185912  | 1.737519  | 0.926457  |
| O      | 0.390903  | 2.829358  | -0.367079 | C      | 3.330210  | -1.618889 | -0.053007 | H      | 5.460211  | 0.511403  | 0.836799  |
| H      | -1.357274 | 4.081864  | -1.048066 | C      | 0.826843  | -1.694814 | -0.064191 | H      | 4.302367  | 0.670646  | -0.483755 |
| H      | -2.975867 | 4.000739  | -0.814628 | H      | 4.200395  | -2.141431 | 0.360348  | H      | 3.183066  | -1.086855 | 3.315027  |
| N      | -0.174025 | 0.654265  | -0.541982 | H      | 3.301730  | -1.851879 | -1.125843 | H      | 4.861758  | -0.647776 | 2.964315  |
| H      | -0.884776 | -0.048532 | -0.687455 | C      | 3.474708  | -0.113947 | 0.143697  | H      | 3.664434  | 0.615756  | 3.277033  |
| C      | 1.189769  | 0.236435  | -0.761441 | H      | 2.615300  | 0.407815  | -0.298145 | O      | 2.736760  | -1.472305 | -0.664171 |
| H      | 1.676307  | 0.958979  | -1.429086 | H      | 3.453282  | 0.118982  | 1.218806  | C      | 2.841213  | -2.730714 | -2.136238 |
| C      | 1.979803  | 0.177541  | 0.561329  | C      | 4.760152  | 0.433956  | -0.466266 | H      | 3.892880  | -2.838505 | -2.398006 |
| C      | 1.123516  | -1.112388 | -1.450548 | H      | 5.622272  | -0.085479 | -0.022642 | H      | 2.522478  | -3.543407 | -1.479454 |
| H      | 1.686022  | 1.067341  | 1.125637  | H      | 4.792920  | 0.219173  | -1.541156 | H      | 2.218528  | -2.737525 | -3.033651 |
| H      | 1.677204  | -0.693709 | 1.150730  | C      | 4.926429  | 1.934012  | -0.270424 |        |           |           |           |
| C      | 3.492437  | 0.172739  | 0.393106  | H      | 4.080911  | 2.450500  | -0.743000 | 253    |           |           |           |
| O      | 0.117559  | -1.779985 | -1.541329 | H      | 4.863332  | 2.163735  | 0.810037  | LysLys |           |           |           |
| H      | 3.798865  | -0.623680 | -0.295325 | N      | 6.148360  | 2.400996  | -0.910595 | N      | -2.403640 | 3.426351  | -1.210280 |
| H      | 3.830399  | 1.117977  | -0.048832 | H      | 6.230946  | 3.407489  | -0.813094 | C      | -2.126990 | 2.346310  | -0.274104 |
| C      | 4.189093  | -0.092232 | 1.717744  | H      | 6.954124  | 2.003735  | -0.436723 | H      | -2.103119 | 2.684121  | 0.781941  |
| O      | 3.716757  | -0.822059 | 2.572881  | O      | 0.442583  | -2.118186 | -1.148183 | C      | -3.199925 | 1.259285  | -0.389054 |
| N      | 5.402158  | 0.504877  | 1.862482  | H      | 1.986564  | -3.910676 | -0.512154 | C      | -0.680966 | 1.919016  | -0.552306 |
| H      | 5.895579  | 0.364773  | 2.728894  | H      | 1.409072  | -4.121727 | 0.982505  | H      | -4.153487 | 1.768853  | -0.575835 |
| H      | 5.750103  | 1.181115  | 1.206140  | N      | 0.170198  | -0.714291 | 0.604087  | H      | -3.020615 | 0.657314  | -1.289900 |
| O      | 2.310177  | -1.490901 | -1.932797 | H      | 0.465163  | -0.410174 | 1.521203  | C      | -3.365550 | 0.373567  | 0.845372  |
| C      | 2.327137  | -2.780127 | -2.552440 | C      | -1.018369 | -0.088747 | 0.070266  | H      | -2.416016 | -0.107427 | 1.117890  |
| H      | 3.351948  | -2.931492 | -2.888623 | H      | -0.891720 | 0.047987  | -1.007129 | H      | -3.623999 | 1.010577  | 1.703410  |
| H      | 2.038777  | -3.552679 | -1.836187 | C      | -2.252855 | -0.974188 | 0.331230  | C      | -4.434743 | -0.697241 | 0.662946  |
| H      | 1.636616  | -2.805228 | -3.398230 | C      | -1.150038 | 1.254830  | 0.763403  | H      | -5.383493 | -0.215943 | 0.382628  |
|        |           |           |           | H      | -2.011414 | -1.950735 | -0.106660 | H      | -4.171597 | -1.362663 | -0.168104 |
| 250    |           |           |           | H      | -2.333511 | -1.114058 | 1.417035  | C      | -4.654134 | -1.545753 | 1.907391  |
| LysIle |           |           |           | C      | -3.537749 | -0.449648 | -0.218039 | H      | -3.714848 | -2.053143 | 2.162399  |
| N      | 1.398352  | -3.715326 | 0.541423  | O      | -0.882178 | 1.420136  | 1.933873  | H      | -4.886126 | -0.878859 | 2.759068  |
| C      | 1.406511  | -2.262719 | 0.625138  | N      | -4.755196 | -0.830488 | 0.300240  | N      | -5.660250 | -2.568853 | 1.658052  |
| H      | 1.366050  | -1.977744 | 1.685704  | C      | -3.861789 | 0.382845  | -1.261906 | H      | -5.764968 | -3.161105 | 2.475121  |
| C      | 2.715133  | -1.735814 | 0.024907  | H      | -4.895425 | -1.451471 | 1.080497  | H      | -6.563617 | -2.128856 | 1.509824  |
| C      | 0.213165  | -1.654533 | -0.117793 | C      | -5.726527 | -0.226543 | -0.435924 | O      | 0.184556  | 2.769948  | -0.732909 |
| H      | 3.525356  | -2.309612 | 0.489187  | N      | -5.220569 | 0.517744  | -1.387363 | H      | -1.567755 | 4.002442  | -1.267911 |
| H      | 2.723402  | -1.986520 | -1.044403 | H      | -3.183662 | 0.905213  | -1.921526 | H      | -3.153399 | 4.007533  | -0.851731 |
| C      | 2.955951  | -0.241263 | 0.207475  | H      | -6.779205 | -0.363963 | -0.228524 | N      | -0.396785 | 0.598527  | -0.558220 |
| H      | 2.154852  | 0.332834  | -0.276924 | O      | -1.590415 | 2.208369  | -0.050288 | H      | -1.119014 | -0.105896 | -0.513349 |
| H      | 2.904159  | 0.008755  | 1.277769  | C      | -1.815426 | 3.480258  | 0.563462  | C      | 0.938008  | 0.124282  | -0.841225 |
| C      | 4.300796  | 0.210085  | -0.351288 | H      | -2.173093 | 4.131094  | -0.232648 | H      | 1.371574  | 0.736793  | -1.640983 |
| H      | 5.105171  | -0.364756 | 0.130781  | H      | -2.565075 | 3.393349  | 1.352950  | C      | 1.847046  | 0.235157  | 0.399428  |

|        |           |           |           |        |           |           |           |        |           |           |           |
|--------|-----------|-----------|-----------|--------|-----------|-----------|-----------|--------|-----------|-----------|-----------|
| C      | 0.791805  | -1.303205 | -1.328767 | H      | 3.054074  | 0.765219  | 1.037434  | C      | 1.295172  | 1.991077  | 0.133678  |
| H      | 1.701465  | 1.255016  | 0.771188  | C      | 4.243721  | -0.275261 | -0.444868 | H      | 4.737669  | 1.672723  | 0.603764  |
| H      | 1.471615  | -0.447043 | 1.173419  | H      | 4.547247  | -1.096929 | 0.220958  | H      | 3.471250  | 0.732674  | 1.338817  |
| C      | 3.332585  | 0.003034  | 0.149444  | H      | 4.122749  | -0.718956 | -1.441200 | C      | 3.973734  | 0.158726  | -0.706952 |
| O      | -0.197291 | -1.980893 | -1.153009 | C      | 5.365277  | 0.751171  | -0.508880 | H      | 3.014452  | -0.286110 | -1.004492 |
| H      | 3.505397  | -1.019106 | -0.207223 | H      | 5.070776  | 1.560032  | -1.190341 | H      | 4.351901  | 0.664144  | -1.606931 |
| H      | 3.667854  | 0.667686  | -0.658638 | H      | 5.480151  | 1.214822  | 0.488359  | C      | 4.936627  | -0.952240 | -0.303090 |
| C      | 4.171490  | 0.261509  | 1.396501  | N      | 6.585097  | 0.148909  | -0.032440 | H      | 5.897881  | -0.508643 | -0.003923 |
| H      | 4.029995  | 1.290924  | 1.746929  | H      | 7.320824  | 0.845853  | -1.086080 | H      | 4.558223  | -1.485960 | 0.577111  |
| H      | 3.824795  | -0.391504 | 2.211440  | H      | 6.916319  | -0.559326 | -0.383719 | C      | 5.177852  | -1.965534 | -1.412650 |
| C      | 5.659075  | 0.030098  | 1.172896  | O      | -0.351533 | -2.276567 | 1.419385  | H      | 4.220569  | -2.428103 | -1.685267 |
| H      | 5.808603  | -0.997533 | 0.791430  | H      | 0.841408  | -0.467561 | 2.667096  | H      | 5.530546  | -1.431192 | -2.314877 |
| H      | 6.008559  | 0.704551  | 0.380703  | H      | -0.127785 | 0.801883  | 2.369549  | N      | 6.070093  | -3.022204 | -0.956271 |
| N      | 6.412028  | 0.334176  | 2.382015  | N      | -1.645518 | -1.175568 | -0.058672 | H      | 6.184650  | -3.720519 | -1.683285 |
| H      | 6.176504  | -0.336148 | 3.107831  | C      | -2.609792 | -2.268565 | -0.107654 | H      | 6.994437  | -2.637670 | -0.784979 |
| H      | 7.406180  | 0.227299  | 2.210045  | C      | -2.086429 | -0.012949 | -0.803173 | O      | 0.466781  | 2.883198  | -0.025579 |
| O      | 1.883353  | -1.735598 | -1.962653 | H      | -3.262724 | -2.250644 | 0.775681  | H      | 2.220066  | 4.109313  | 0.763381  |
| C      | 1.821618  | -3.089210 | -2.418073 | H      | -2.078541 | -3.222113 | -0.107035 | H      | 3.845359  | 3.942900  | 0.666904  |
| H      | 2.779806  | -3.282049 | -2.898602 | C      | -3.381415 | -1.971744 | -1.386144 | N      | 0.929535  | 0.715153  | 0.382918  |
| H      | 1.667044  | -3.770997 | -1.578604 | C      | -3.452395 | -0.446007 | -1.388715 | H      | 1.600471  | -0.011405 | 0.587594  |
| H      | 1.002344  | -3.214999 | -3.129489 | H      | -1.391916 | 0.243154  | -1.613538 | C      | -0.461080 | 0.356643  | 0.513223  |
| 254    |           |           |           | C      | -2.264680 | 1.220499  | 0.068733  | H      | -0.987582 | 1.147594  | 1.057210  |
| LysMet |           |           |           | H      | -4.369041 | -2.439296 | -1.406343 | C      | -1.126980 | 0.194652  | -0.877390 |
| N      | -2.294085 | 3.387802  | -1.278383 | H      | -2.817272 | -2.329247 | -2.254556 | C      | -0.512748 | -0.931511 | 1.307247  |
| C      | -2.065033 | 2.323494  | -0.310480 | H      | -4.257683 | -0.113817 | -0.733827 | H      | -0.839104 | 1.091655  | -1.435199 |
| H      | -2.118826 | 2.674225  | 0.739795  | H      | -3.628126 | -0.003722 | -2.371110 | H      | -0.672427 | -0.665831 | -1.381375 |
| C      | -3.108942 | 1.218106  | -0.484293 | O      | -2.265002 | 1.242261  | 1.276433  | C      | -2.624684 | 0.070107  | -0.847560 |
| C      | -0.596250 | 1.923434  | -0.484363 | O      | -2.455349 | 2.298318  | -0.701755 | O      | 0.418485  | -1.702904 | 1.398594  |
| H      | -4.064766 | 1.710862  | -0.703363 | C      | -2.674549 | 3.519352  | 0.007690  | C      | -3.265829 | -1.140767 | -1.102863 |
| H      | -2.882027 | 0.632676  | -1.385497 | H      | -1.813881 | 3.754471  | 0.638202  | C      | -3.419342 | 1.185313  | -0.556921 |
| C      | -3.304986 | 0.314317  | 0.732355  | H      | -2.810537 | 4.284840  | -0.755188 | H      | -2.673890 | -2.022148 | -1.339339 |
| H      | -2.358783 | -0.159920 | 1.026640  | H      | -3.563288 | 3.442989  | 0.638480  | C      | -4.653188 | -1.245819 | -1.070019 |
| H      | -3.596636 | 0.937492  | 1.589860  | 256    |           |           |           | C      | -4.802428 | 1.096990  | -0.515416 |
| C      | -4.357035 | -0.764602 | 0.504166  | LysSer |           |           |           | H      | -2.939437 | 2.142926  | -0.366508 |
| H      | -5.303485 | -0.289667 | 0.205926  | N      | 1.298841  | -3.661361 | 0.538679  | H      | -5.133426 | -2.199885 | -1.279600 |
| H      | -4.064990 | -1.414993 | 0.329238  | C      | 1.145412  | -2.217155 | 0.628517  | C      | -5.427120 | -0.124974 | -0.772937 |
| C      | -4.599269 | -1.633892 | 1.299774  | H      | 1.026825  | -1.947733 | 1.687425  | O      | -5.417611 | 1.963011  | -0.293811 |
| H      | -3.660860 | -2.133376 | 2.003071  | C      | 2.414232  | -1.547677 | 0.089494  | H      | -0.784121 | -0.758477 | -0.724912 |
| H      | -4.862088 | -0.982423 | 2.584549  | C      | -0.068845 | -1.734411 | -0.169878 | H      | -7.081675 | -1.050145 | -0.931453 |
| N      | -5.585326 | -2.665522 | 1.439260  | H      | 3.260517  | -2.022746 | 0.598727  | O      | -1.703908 | -1.125970 | 1.865845  |
| H      | -5.701735 | -3.272647 | 2.243724  | H      | 2.502141  | -1.802186 | -0.975224 | C      | -1.851069 | -2.357475 | 2.574111  |
| H      | -6.490741 | -2.235075 | 1.276261  | C      | 2.472913  | -0.034348 | 0.264188  | H      | -1.681835 | -3.206540 | 1.907732  |
| O      | 0.269524  | 2.790173  | -0.547547 | H      | 1.635574  | 0.438533  | -0.266217 | H      | -1.138843 | -2.410549 | 3.400831  |
| H      | -1.481721 | 3.998866  | -1.260502 | H      | 2.341755  | 0.217362  | 1.327169  | H      | -2.874199 | -2.360888 | 2.946999  |
| H      | -3.096913 | 3.939684  | -0.995833 | C      | 3.783006  | 0.562253  | -0.238204 | 258    |           |           |           |
| N      | -0.291845 | 0.607221  | -0.538715 | H      | 4.623400  | 0.089283  | 0.290938  | LysThr |           |           |           |
| H      | -1.003835 | -0.105014 | -0.617153 | H      | 3.922061  | 0.332559  | -1.301531 | N      | -1.101564 | 3.421120  | -1.301220 |
| C      | 1.067486  | 0.173934  | -0.752776 | C      | 3.864481  | 2.071068  | -0.057168 | C      | -1.185721 | 2.331950  | -0.337848 |
| H      | 1.548449  | 0.853582  | -1.467270 | H      | 3.040526  | 2.541088  | -0.609592 | H      | -1.598753 | 2.651253  | 0.640496  |
| C      | 1.873193  | 0.203816  | 0.563329  | H      | 3.698765  | 2.313664  | 1.009368  | C      | -2.084072 | 1.216216  | -0.875845 |
| C      | 0.989979  | -1.215017 | -1.356764 | N      | 5.115136  | 2.584764  | -0.599229 | C      | 0.264089  | 1.958539  | -0.011364 |
| H      | 1.653654  | 1.173797  | 1.020060  | H      | 5.144600  | 3.595060  | -0.510377 | H      | -2.934018 | 1.700756  | -1.373446 |
| H      | 1.491713  | -0.572247 | 1.237466  | H      | 5.893757  | 2.230240  | -0.051696 | H      | -1.562527 | 0.673184  | -1.675770 |
| C      | 3.378596  | 0.069114  | 0.384234  | O      | -0.319264 | -1.193823 | -1.278219 | C      | -2.631286 | 0.259411  | 0.183459  |
| O      | -0.010064 | -1.897935 | -1.358853 | H      | 1.217247  | -3.904114 | -0.447391 | H      | -1.814038 | -0.219940 | 0.739331  |
| H      | 3.641236  | -0.889790 | -0.071369 | H      | 0.507190  | -4.112299 | 0.989180  | H      | -3.189828 | 0.843307  | 0.929362  |
| H      | 3.748666  | 0.868541  | -0.268648 | N      | -0.833656 | -0.777280 | 0.104660  | C      | -3.538566 | -0.815798 | -0.403116 |
| S      | 4.190066  | 0.201203  | 0.205931  | H      | -0.618413 | -0.410338 | 1.327259  | H      | -4.358941 | -0.335322 | -0.956882 |
| C      | 5.911036  | 0.016574  | 1.486463  | C      | -1.955819 | -0.175289 | -0.268055 | H      | -2.991219 | -1.423678 | -1.133626 |
| H      | 6.209883  | 0.819951  | 0.807298  | H      | -1.728640 | -0.056851 | -1.331141 | C      | -4.124749 | -1.743066 | 0.652014  |
| H      | 6.527311  | 0.074017  | 2.386271  | C      | -3.194766 | -1.069688 | -0.133320 | H      | -3.303769 | -2.249680 | 1.175408  |
| H      | 6.081934  | -0.951769 | 1.007531  | C      | -2.199374 | 1.176702  | 0.372851  | H      | -4.646612 | -1.133041 | 1.413371  |
| O      | 2.156593  | -1.605138 | -1.874452 | H      | -2.939068 | -2.028484 | -0.603867 | N      | -4.956687 | -2.764983 | 0.031795  |
| C      | 2.160671  | -2.922744 | -2.431296 | H      | -3.375343 | -1.242977 | 0.939655  | H      | -5.304104 | -3.406954 | 0.736410  |
| H      | 3.171959  | -3.081865 | -2.802890 | O      | -4.279594 | -0.430325 | -0.759286 | H      | -5.775380 | -2.331478 | -0.384701 |
| H      | 1.909293  | -3.662517 | -1.667944 | O      | -1.953521 | 1.409264  | 1.537478  | O      | 1.072727  | 2.840869  | 0.256998  |
| H      | 1.435945  | -2.994151 | -3.245262 | H      | -5.009131 | -1.054531 | -0.802649 | H      | -0.360272 | 4.045454  | -0.994490 |
| 255    |           |           |           | O      | -2.714471 | 2.056000  | -0.478101 | H      | -1.967383 | 3.949476  | -1.296276 |
| LysPro |           |           |           | C      | -3.042415 | 3.325771  | 0.087363  | N      | 0.590033  | 0.644682  | 0.006233  |
| N      | 0.726839  | 0.343766  | 2.062069  | H      | -3.444605 | 3.918156  | -0.733171 | H      | -0.027818 | -0.038709 | -0.406116 |
| C      | 0.510378  | -0.166130 | 0.713887  | H      | -3.787423 | 3.210277  | 0.877985  | C      | 1.949681  | 0.216897  | 0.194272  |
| H      | 0.196516  | 0.676490  | 0.087067  | H      | -2.152126 | 3.800884  | 0.506085  | H      | 2.603827  | 1.078304  | 0.016270  |
| C      | 1.813958  | -0.728423 | 0.138143  | 257    |           |           |           | C      | 2.227502  | -0.311772 | 1.609564  |
| C      | -0.534387 | -1.284222 | 0.723091  | LysTyr |           |           |           | C      | 2.247210  | -0.867536 | -0.828087 |
| H      | 2.122102  | -1.569820 | 0.771839  | N      | 2.988474  | 3.462488  | 0.920500  | H      | 3.302568  | -0.545919 | 1.650436  |
| H      | 1.613505  | -1.152856 | -0.855391 | C      | 2.788718  | 2.319617  | 0.038110  | C      | 1.881052  | 0.701786  | 2.684565  |
| C      | 2.925691  | 0.309169  | 0.049233  | H      | 2.934154  | 2.569305  | -1.031886 | O      | 1.458133  | -1.495633 | 1.731894  |
| H      | 2.612993  | 1.121345  | -0.623607 | C      | 3.769663  | 1.200946  | 0.391256  | O      | 1.427435  | -1.348608 | -1.573801 |
|        |           |           |           |        |           |           |           | H      | 0.808471  | 0.911650  | 2.667600  |

|        |           |           |           |        |           |           |           |        |           |           |           |
|--------|-----------|-----------|-----------|--------|-----------|-----------|-----------|--------|-----------|-----------|-----------|
| H      | 2.142157  | 0.309735  | 3.674250  | H      | -4.068486 | 2.189790  | -1.018454 | C      | 4.681140  | -0.540616 | 0.325097  |
| H      | 2.417675  | 1.642015  | 2.534460  | N      | -5.489317 | 2.381926  | 0.597759  | H      | 4.701568  | -0.253906 | 1.384028  |
| H      | 1.569500  | -1.830958 | 2.626715  | H      | -5.576228 | 3.388641  | 0.505739  | H      | 4.961096  | -1.595363 | 0.252066  |
| O      | 3.533809  | -1.225335 | -0.793711 | H      | -6.250250 | 1.982240  | 0.056469  | S      | 5.869378  | 0.482661  | -0.593203 |
| C      | 3.889442  | -2.274185 | -1.695372 | O      | 0.150243  | -2.075101 | 1.322145  | C      | 7.396720  | -0.040005 | 0.219657  |
| H      | 4.955601  | -2.442618 | -1.548075 | H      | -1.252963 | -3.882963 | 0.448526  | H      | 7.564424  | -1.113274 | 0.093864  |
| H      | 3.321625  | -3.179833 | -1.469806 | H      | -0.503999 | -4.045294 | -0.974292 | H      | 8.218144  | 0.500524  | -0.255667 |
| H      | 3.686434  | -1.977746 | -2.727068 | N      | 0.657927  | -0.670571 | -0.378814 | H      | 7.387091  | 0.206721  | 1.285153  |
| 259    |           |           |           | H      | 0.395659  | -0.267320 | -1.268054 | O      | 0.393580  | -1.638711 | -1.009103 |
| LysTrp |           |           |           | C      | 1.712519  | 0.004507  | 0.341353  | H      | 2.060618  | -3.196465 | 0.974518  |
| N      | 2.411380  | 3.596621  | 0.996549  | H      | 1.387733  | 0.165674  | 1.376755  | H      | 2.300872  | -2.928335 | -0.598943 |
| C      | 2.488244  | 2.436721  | 0.119382  | C      | 3.011621  | -0.844029 | 0.385512  | N      | 0.217290  | 0.125102  | 0.395518  |
| H      | 2.605488  | 2.708969  | -0.949131 | C      | 1.901859  | 1.349505  | -0.331763 | H      | 0.638504  | 0.719477  | 1.096708  |
| C      | 3.681092  | 1.559663  | 0.507777  | H      | 2.653383  | -1.826943 | 0.713959  | C      | -1.036484 | 0.579926  | -0.156119 |
| C      | 1.102757  | 1.784075  | 0.176924  | C      | 3.646212  | -0.987762 | -0.993620 | H      | -0.992042 | 0.498221  | -1.249598 |
| H      | 4.498301  | 2.235532  | 0.789643  | C      | 4.008983  | -0.344622 | 1.425103  | C      | -2.214566 | -0.274516 | 0.351102  |
| H      | 3.447001  | 1.002414  | 1.424734  | O      | 1.456980  | 1.629706  | -1.423799 | C      | -1.173573 | 2.041375  | 0.225964  |
| C      | 4.188234  | 0.629861  | -0.594062 | H      | 4.071791  | -0.038989 | -1.342004 | H      | -1.891638 | -1.315322 | 0.264753  |
| H      | 3.385513  | -0.027495 | -0.955039 | H      | 4.458919  | -1.719882 | -0.966827 | H      | -2.380368 | -0.083090 | 1.416463  |
| H      | 4.477210  | 1.238772  | -1.462736 | H      | 2.916310  | -1.323329 | -1.736557 | C      | -3.505491 | -0.092282 | 0.430510  |
| C      | 5.371882  | -0.222215 | -0.151429 | H      | 3.544788  | -0.259903 | 2.413008  | O      | -0.495971 | 2.587992  | 1.067535  |
| H      | 6.177043  | 0.435441  | 0.208356  | H      | 4.843749  | -1.047682 | 1.508555  | H      | -3.861554 | 0.943206  | -0.402122 |
| H      | 5.091142  | -0.856130 | 0.698333  | H      | 4.417930  | 0.634470  | 1.160540  | H      | -3.361341 | -0.324583 | -1.492447 |
| C      | 5.914036  | -1.115431 | -1.258251 | O      | 2.626747  | 2.189322  | 0.409599  | C      | -4.607571 | -0.974690 | 0.096980  |
| H      | 5.118741  | -1.797037 | -1.586191 | C      | 2.868028  | 3.467091  | -1.184030 | O      | -4.546619 | -1.164052 | 0.901122  |
| H      | 6.164141  | -0.488103 | -2.134542 | H      | 3.465617  | 4.019680  | 0.539664  | O      | -2.141225 | 2.652786  | -0.460922 |
| N      | 7.020901  | -1.924628 | -0.767160 | H      | 3.409124  | 3.357161  | -1.126653 | C      | -2.343475 | 4.029557  | -0.127767 |
| H      | 7.342923  | -2.553415 | -1.495332 | H      | 1.924446  | 3.982414  | -0.377256 | H      | -3.157681 | 4.370006  | -0.765858 |
| H      | 7.808677  | -1.323934 | -0.543098 | 261    |           |           |           | H      | -2.609251 | 4.134088  | 0.926513  |
| O      | 0.098290  | 2.486386  | 0.088041  | MetAsp |           |           |           | H      | -1.435781 | 4.604847  | -0.322502 |
| H      | 1.508207  | 4.037790  | 0.844194  | N      | -2.478015 | -3.244311 | -0.944031 | O      | -5.698368 | -0.896718 | -0.683754 |
| H      | 3.127021  | 4.267705  | 0.739305  | C      | -2.225600 | -1.815075 | -0.868910 | C      | -6.800083 | -1.694083 | -0.254949 |
| N      | 1.031433  | 0.442329  | 0.295930  | H      | -2.263998 | -1.402064 | -1.886278 | H      | -7.589695 | -0.192022 | -0.987546 |
| H      | 1.848571  | -0.127073 | 0.465119  | C      | -3.334303 | -1.165124 | -0.030929 | H      | -6.522850 | -2.750670 | -0.222819 |
| C      | -0.240762 | -0.233063 | 0.379189  | C      | -0.860389 | -1.519407 | -0.240365 | H      | -7.133207 | -1.391118 | 0.740992  |
| H      | -0.917831 | 0.342443  | 1.019445  | H      | -4.287937 | -1.494139 | -0.455872 | 263    |           |           |           |
| C      | -0.900461 | -0.376449 | -0.019703 | H      | -3.276443 | -1.567767 | 0.987686  | MetAla |           |           |           |
| C      | 0.023549  | -1.582704 | 1.010955  | C      | -3.269940 | 0.355645  | 0.012157  | N      | -1.892614 | 2.519059  | 0.387770  |
| H      | -0.732805 | 0.586605  | -1.513985 | H      | -2.349986 | 0.696470  | 0.500942  | C      | -1.130566 | 1.288622  | 0.492491  |
| H      | -0.356265 | -1.134257 | -1.594905 | H      | -3.284357 | 0.769354  | -1.004584 | C      | -1.035995 | 1.023808  | 1.554723  |
| C      | -2.361494 | -0.668520 | -0.987097 | S      | -4.696967 | 1.004853  | 0.930772  | H      | -1.865198 | 0.147650  | -0.229731 |
| O      | 1.124857  | -2.085329 | 1.091719  | C      | -4.324662 | 2.771180  | 0.846048  | C      | 0.270299  | 1.432929  | -0.116962 |
| C      | -2.997582 | -1.820513 | -1.363051 | H      | -4.297959 | 3.124813  | -0.188571 | H      | -1.959466 | 0.414237  | -1.290093 |
| C      | -3.374091 | 1.552007  | -0.059923 | H      | -5.126108 | 3.294631  | 1.371894  | C      | -1.262112 | -0.767359 | -0.185195 |
| C      | -3.389623 | 0.235386  | -0.545199 | H      | -3.375655 | 3.003277  | 1.337754  | H      | -3.243429 | -0.101589 | 0.362960  |
| H      | -2.581387 | -2.738283 | -1.756048 | O      | -0.456819 | -2.158937 | 0.724654  | H      | -3.155358 | -0.404245 | 1.414017  |
| N      | -4.354458 | -1.690554 | -1.178406 | H      | -1.830444 | -3.667129 | -1.603029 | H      | -3.825152 | 0.823635  | 0.322346  |
| C      | -4.626927 | -0.440095 | -0.679680 | H      | -2.232706 | -3.636052 | -0.036281 | S      | -4.094249 | -1.412350 | -0.564840 |
| C      | -4.578884 | 2.146717  | 0.278411  | N      | -0.134678 | -0.523915 | -0.934026 | C      | -5.684876 | -1.393793 | 0.293140  |
| H      | -2.433653 | 2.089410  | 0.041346  | H      | -0.498581 | 0.034234  | -1.565068 | H      | -6.173020 | -0.419525 | 0.201431  |
| H      | -5.040202 | -2.388414 | -1.405901 | C      | 1.117384  | -0.083825 | -0.242734 | H      | -6.317313 | -2.147870 | -0.180385 |
| C      | -5.841461 | 0.158492  | -0.341126 | H      | 1.019425  | 0.035220  | 0.843341  | H      | -5.571064 | -1.648204 | 1.350773  |
| C      | -5.797350 | 1.457616  | 0.140388  | C      | 2.244738  | -1.103335 | -0.497273 | O      | 0.498512  | 2.258142  | -0.993846 |
| H      | -4.586430 | 3.165078  | 0.655700  | C      | 1.429217  | 1.266722  | -0.861079 | H      | -1.519796 | 3.199099  | 1.043480  |
| H      | -6.784680 | -0.369739 | -0.450040 | H      | 1.872938  | -2.059751 | -0.113747 | H      | -1.692758 | 2.906463  | -0.533704 |
| H      | -6.723921 | 1.953866  | 0.414341  | H      | 2.447642  | -1.203090 | -1.565570 | N      | 1.213971  | 0.582786  | 0.348740  |
| O      | -1.093614 | -2.162976 | 1.440856  | C      | 3.544639  | -0.791607 | 0.200792  | H      | 0.987564  | -0.147315 | 1.011329  |
| C      | -0.922755 | -3.463575 | 2.004999  | O      | 0.760509  | 1.788761  | -1.725351 | C      | 2.527346  | 0.510537  | -0.245296 |
| H      | -0.480433 | -4.145498 | 1.274763  | O      | 4.631029  | -0.783287 | -0.325409 | H      | 2.427473  | 0.544766  | -1.337868 |
| H      | -0.272411 | -3.418189 | 2.881704  | O      | 2.537826  | 1.793929  | -0.348176 | C      | 3.435095  | 1.664580  | 0.188442  |
| H      | -1.921432 | -3.795324 | 2.285608  | C      | 2.946732  | 3.039986  | -0.919272 | C      | 3.117902  | -0.831915 | 1.136919  |
| 260    |           |           |           | H      | 3.871468  | 3.306404  | -0.410168 | H      | 3.568720  | 1.661626  | 1.274202  |
| LysVal |           |           |           | H      | 3.117246  | 2.929204  | -1.992167 | H      | 4.413081  | 1.585312  | -0.291713 |
| N      | -1.329396 | -3.642668 | -0.538614 | H      | 2.181761  | 3.802223  | -0.755520 | H      | 2.965094  | 2.603479  | -0.109808 |
| C      | -1.257388 | -2.191218 | -0.622578 | O      | 3.346864  | -0.559828 | 1.508206  | O      | 2.607942  | -1.605998 | 0.916596  |
| H      | -1.134890 | -1.912710 | -1.678539 | C      | 4.525365  | -0.252984 | 2.248514  | O      | 4.279909  | -1.047819 | -0.479720 |
| C      | -2.570420 | -1.597262 | -0.102945 | H      | 4.991980  | 0.657745  | 1.864404  | C      | 4.917707  | -2.285458 | -0.157247 |
| C      | -0.087350 | -1.643065 | 0.199037  | H      | 4.201030  | -0.110804 | 3.278883  | H      | 5.839319  | -2.301972 | -0.737331 |
| H      | -3.381854 | -2.117218 | -0.624895 | H      | 5.246648  | -1.071008 | 2.182916  | H      | 5.135227  | -2.337398 | 0.912057  |
| H      | -2.658619 | -1.858149 | 0.960229  | 262    |           |           |           | H      | 4.277453  | -3.127834 | -0.428926 |
| C      | -2.710834 | -0.088966 | -0.275891 | MetGlu |           |           |           | 264    |           |           |           |
| H      | -1.900719 | 0.428133  | 0.255898  | N      | 2.612511  | -2.640804 | 0.327962  | MetArg |           |           |           |
| H      | -2.592466 | 0.171234  | -1.338252 | C      | 2.252533  | -1.242713 | 0.471888  | N      | 3.299919  | -2.605652 | 0.416834  |
| C      | -4.051033 | 0.435302  | 0.227753  | H      | 2.255053  | -0.988401 | 1.540843  | C      | 2.814807  | -1.241173 | 0.513126  |
| H      | -4.865116 | -0.082108 | -0.300938 | C      | 3.282855  | -0.353941 | -0.243108 | H      | 2.787489  | -0.951730 | 1.572810  |
| H      | -4.176207 | 0.197413  | 1.290981  | C      | 0.864845  | -0.949001 | -0.112353 | C      | 3.765934  | -0.288216 | -0.228376 |
| C      | -4.215317 | 1.937558  | 0.048605  | H      | 3.277927  | -0.610083 | -1.310229 | C      | 1.410090  | -1.094080 | -0.087416 |
| H      | -3.415191 | 2.451193  | 0.597296  | H      | 2.979194  | 0.697224  | -0.167584 | H      | 3.789564  | -0.579500 | -1.286184 |





|        |           |           |           |        |           |           |           |        |           |           |           |
|--------|-----------|-----------|-----------|--------|-----------|-----------|-----------|--------|-----------|-----------|-----------|
| O      | -0.157741 | -2.231723 | 1.447955  | N      | 0.981321  | 0.410990  | 0.448059  | C      | -5.194671 | 1.435195  | 2.349401  |
| H      | 0.068571  | 0.871542  | 2.328514  | H      | 1.663392  | -0.308249 | 0.647497  | H      | -5.404270 | 2.232153  | 1.630239  |
| H      | 1.055999  | -0.387165 | 2.617151  | C      | -0.403696 | 0.017793  | 0.538877  | H      | -5.937249 | 1.483892  | 3.148795  |
| N      | -1.516060 | -1.178424 | -0.008027 | H      | -0.934717 | 0.719350  | 1.192146  | H      | -4.202896 | 1.585826  | 2.785281  |
| C      | -2.464421 | -2.287171 | -0.007615 | C      | -1.094657 | 0.041701  | -0.850598 | O      | -0.850147 | -1.937116 | -0.548591 |
| C      | -1.997411 | -0.038081 | -0.762282 | C      | -0.432933 | -1.363583 | 1.157442  | H      | -2.415633 | -2.509636 | -3.165520 |
| H      | -3.093617 | -2.259378 | 0.892451  | H      | -0.695249 | 0.927488  | -1.353669 | H      | -2.508449 | 3.267862  | -1.739556 |
| H      | -1.917982 | -3.231997 | -0.006080 | H      | -0.773786 | -0.832701 | -1.428290 | N      | -1.047963 | 0.227095  | -1.184748 |
| C      | -3.273798 | -2.029418 | -1.270917 | C      | -2.594215 | 0.136536  | -0.798065 | H      | -1.608515 | 0.961849  | -1.594826 |
| C      | -3.370689 | -0.505605 | -1.302382 | O      | 0.543605  | -2.072038 | 1.276091  | C      | 0.233557  | 0.622954  | -0.652754 |
| H      | -1.330146 | 0.212570  | -1.597019 | C      | -3.419090 | -0.929292 | -1.150519 | H      | 0.379440  | 0.153868  | 0.325886  |
| C      | -2.171121 | 1.210420  | 0.089108  | C      | -3.199424 | 1.332393  | -0.392494 | C      | 1.398416  | 0.179045  | -1.580135 |
| H      | -4.253488 | -2.513463 | -1.255565 | H      | -2.975733 | -1.868069 | -1.474029 | C      | 0.195726  | 2.127070  | -0.490194 |
| H      | -2.726273 | -2.395608 | -2.146240 | C      | -4.805453 | -0.815637 | -1.102665 | H      | 1.140038  | -0.838204 | -1.893810 |
| H      | -4.164227 | -0.172491 | -0.624012 | C      | -4.578747 | 1.460000  | -0.334133 | H      | 1.398108  | 0.805239  | -2.479750 |
| H      | -3.578965 | -0.086364 | -2.288398 | H      | -2.568747 | 2.177808  | -0.124746 | C      | 2.736971  | 0.171125  | -0.925702 |
| O      | -2.101039 | 1.264584  | 1.293812  | H      | -5.432291 | -1.658539 | -1.387999 | O      | -0.605459 | 2.845026  | -1.051450 |
| O      | -2.444336 | 2.259910  | -0.695003 | C      | -5.390329 | 0.381082  | -0.691141 | C      | 3.801413  | 0.994918  | -1.173798 |
| C      | -2.666888 | 3.491663  | -0.005029 | H      | -5.047798 | 2.387836  | -0.023253 | C      | 2.530864  | -1.797151 | 0.776912  |
| H      | -1.780998 | 3.773906  | 0.568647  | O      | -6.735343 | 0.557573  | -0.622061 | C      | 3.157468  | -0.732117 | 0.111915  |
| H      | -2.873755 | 4.230680  | -0.777964 | H      | -7.171011 | -0.253826 | -0.901514 | H      | 3.892660  | 1.804422  | -1.885402 |
| H      | -3.515092 | 3.401644  | 0.677556  | O      | -1.661265 | -1.714107 | 1.529087  | N      | 4.853792  | 0.663173  | -0.352936 |
| 276    |           |           |           | C      | -1.779020 | -3.026357 | 2.081237  | C      | 4.491121  | -0.393620 | 0.446204  |
| MetSer |           |           |           | H      | -1.447664 | -3.778050 | 1.360897  | C      | 3.242820  | -2.481244 | 1.748848  |
| N      | 1.895978  | -3.300340 | 0.595106  | H      | -1.174307 | -3.115613 | 2.986659  | H      | 1.509886  | -3.078074 | 0.527404  |
| C      | 1.528032  | -1.895038 | 0.651376  | H      | -2.835876 | -3.153647 | 2.310967  | H      | 5.757716  | 1.101313  | -0.363555 |
| H      | 1.384755  | -1.616081 | 1.704518  | 278    |           |           |           | C      | 5.210133  | -1.082864 | 1.423984  |
| C      | 2.681167  | -1.064471 | 0.073323  | MetThr |           |           |           | C      | 4.565892  | -2.127165 | 2.068964  |
| C      | 0.245172  | -1.621535 | -0.140418 | N      | 2.058962  | -2.607265 | -0.298978 | H      | 2.774263  | -3.308434 | 2.273812  |
| H      | 3.592393  | -1.383899 | 0.589018  | C      | 1.357222  | -1.420822 | 0.153066  | H      | 6.233664  | -0.814738 | 1.670910  |
| H      | 2.796963  | -1.328408 | -0.984962 | H      | 1.285389  | -1.451481 | 1.249087  | H      | 5.095759  | -2.684997 | 2.835663  |
| C      | 2.494367  | 0.440346  | 0.211117  | C      | 2.136007  | -0.156831 | -0.248698 | O      | 1.158100  | 2.568863  | 0.314334  |
| H      | 1.619699  | 0.781090  | -0.354340 | C      | -0.055319 | -1.327970 | -0.435911 | C      | 1.218367  | 3.987488  | 0.468087  |
| H      | 2.343243  | 0.712916  | 1.263708  | H      | 2.222358  | -0.138890 | -1.342574 | H      | 1.374431  | 4.473360  | -0.498008 |
| S      | 3.968084  | 1.300760  | -0.413260 | H      | 1.568814  | 0.736732  | 0.039117  | H      | 0.291127  | 4.365030  | 0.905515  |
| C      | 3.439886  | 3.011111  | -0.165528 | C      | 3.521930  | -0.130825 | 0.376887  | H      | 2.059850  | 4.175102  | 1.133456  |
| H      | 3.247441  | 3.221033  | 0.890512  | H      | 3.442970  | -0.101905 | 1.470906  | 280    |           |           |           |
| H      | 4.256497  | 3.652445  | -0.504163 | H      | 4.058617  | -1.041979 | 0.096981  | MetVal |           |           |           |
| H      | 2.547821  | 3.242946  | -0.754428 | S      | 4.441592  | 1.329295  | -0.193227 | N      | 2.165188  | -2.552828 | 0.165647  |
| O      | 0.048581  | -2.156216 | -1.225100 | C      | 6.031458  | 1.001109  | 0.601110  | C      | 1.497676  | -1.280067 | 0.365537  |
| H      | 1.200604  | -3.850660 | 1.091199  | H      | 6.464069  | 0.060413  | 0.248932  | H      | 1.412349  | -1.093888 | 1.445130  |
| H      | 1.818558  | -3.585646 | -0.379802 | H      | 6.703722  | 1.818188  | 0.330293  | C      | 2.323420  | -0.144694 | -0.260596 |
| N      | -0.638539 | -0.758027 | 0.417326  | H      | 5.936164  | 0.974937  | 1.690407  | C      | 0.096124  | -1.267733 | -0.259715 |
| H      | -0.475025 | -0.339504 | 1.322877  | O      | -0.344140 | -1.885778 | -1.487107 | H      | 2.407622  | -0.333421 | -1.338404 |
| C      | -1.854755 | -0.364937 | -0.252367 | H      | 1.659646  | -3.424258 | 0.153089  | H      | 1.789709  | 0.806495  | -0.145953 |
| H      | -1.671136 | -0.257068 | -1.324922 | H      | 1.836796  | -2.719139 | -1.287301 | C      | 3.710490  | -0.048127 | 0.355477  |
| C      | -2.936156 | -1.434664 | -0.050471 | N      | -0.938909 | -0.575598 | 0.268150  | H      | 3.635019  | 0.178678  | 1.426401  |
| C      | -2.290762 | 0.958365  | 0.345046  | H      | -0.612316 | -0.019426 | 1.046073  | H      | 4.219871  | -1.009739 | 0.245533  |
| H      | -2.541226 | -2.361858 | -0.486832 | C      | -2.197226 | -0.168858 | -0.297717 | S      | 4.667378  | 1.260683  | -0.565281 |
| H      | -3.068069 | -1.586127 | 1.032966  | H      | -2.168913 | -0.398475 | -1.369285 | C      | 6.244773  | 1.052545  | 0.392184  |
| O      | -4.118411 | -1.001586 | -0.675460 | C      | -3.402960 | -0.895069 | 0.314387  | H      | 6.657219  | 0.053611  | 0.225172  |
| O      | -2.045345 | 1.277934  | 1.489144  | C      | -2.339654 | 1.333239  | -0.105808 | H      | 6.937235  | 1.790200  | -0.019144 |
| H      | -4.739009 | -1.735480 | -0.681688 | H      | -4.289899 | -0.554756 | -0.241957 | H      | 6.141857  | 1.231416  | 1.466263  |
| O      | -2.970518 | 1.704672  | -0.516377 | C      | -3.277676 | -2.403917 | 0.210774  | O      | -0.183615 | -1.999349 | -1.202200 |
| C      | -3.484842 | 2.927219  | 0.014238  | O      | -3.465681 | -0.459018 | 1.661007  | H      | 1.734290  | -3.252888 | 0.761984  |
| H      | -4.008497 | 3.408384  | -0.810427 | O      | -1.557197 | 2.020249  | 0.507257  | H      | 1.947131  | -2.848342 | -0.785269 |
| H      | -4.171747 | 2.725129  | 0.839227  | H      | -2.413520 | -2.746175 | 0.785788  | N      | -0.785051 | -0.387194 | 0.269239  |
| H      | -2.671782 | 3.560394  | 0.377117  | H      | -4.175357 | -2.889571 | 0.609750  | H      | -0.512660 | 0.258866  | 0.998153  |
| 277    |           |           |           | H      | -3.148986 | -2.722342 | -0.827169 | C      | -2.082700 | -0.159843 | -0.323822 |
| MetTyr |           |           |           | H      | -4.191237 | -0.921867 | 2.090962  | H      | -1.982871 | -0.186658 | -1.415595 |
| N      | 2.953962  | 3.064122  | 1.417180  | O      | -3.441910 | 1.796140  | -0.700608 | C      | -3.101564 | -1.257999 | 0.083409  |
| C      | 2.791096  | 2.108056  | 0.329574  | C      | -3.672904 | 3.195823  | -0.532858 | C      | -2.509774 | 1.231759  | 0.100692  |
| H      | 2.926513  | 2.562852  | -0.671297 | H      | -4.594243 | 3.410665  | -1.072880 | H      | -2.562361 | -2.188975 | -0.129228 |
| C      | 3.813782  | 0.980365  | 0.473054  | H      | -3.781518 | 3.439326  | 0.526515  | C      | -3.427152 | -1.208271 | 1.572367  |
| C      | 1.310150  | 1.717531  | 0.352990  | H      | -2.842259 | 3.773301  | -0.945088 | C      | -4.360413 | -1.243326 | -0.777092 |
| H      | 4.776931  | 1.438897  | 0.727156  | 279    |           |           |           | O      | -2.001196 | 1.845339  | 1.013899  |
| H      | 3.559390  | 0.348023  | 1.332559  | MetTrp |           |           |           | H      | -4.012730 | -0.316819 | 1.826923  |
| C      | 3.994110  | 0.152912  | -0.795300 | N      | -2.976813 | -2.574785 | -2.320900 | H      | -2.517857 | -1.198859 | 2.180918  |
| H      | 3.055605  | -0.323486 | -1.101054 | C      | -2.916028 | -1.312135 | -1.602925 | H      | -4.115300 | -1.287529 | -1.843133 |
| H      | 4.315776  | 0.803071  | -1.618250 | H      | -3.215662 | -0.508368 | -2.289449 | H      | -4.982889 | -2.112187 | -0.541511 |
| S      | 5.250672  | -1.130702 | -0.525048 | C      | -3.912825 | -1.362774 | -0.437894 | H      | -4.958779 | -0.343941 | -0.607104 |
| C      | 5.229815  | -1.912565 | -2.153948 | C      | -1.508226 | -1.038565 | -1.065458 | O      | -3.519144 | 1.699193  | -0.635055 |
| H      | 5.516524  | -1.207684 | -2.939528 | H      | -4.879414 | -1.659152 | -0.857805 | C      | -3.989117 | 2.997432  | -0.263194 |
| H      | 5.960493  | -2.723896 | -2.130800 | H      | -3.598172 | -2.158042 | 0.248596  | H      | -4.802425 | 3.223920  | -0.951164 |
| H      | 4.246926  | -2.335541 | -2.379982 | C      | -4.042654 | -0.049883 | 0.322034  | H      | -4.346660 | 2.995585  | 0.769042  |
| O      | 0.458063  | 2.598442  | 0.277540  | H      | -3.098198 | 0.213270  | 0.811679  | H      | -3.188247 | 3.734105  | -0.357914 |
| H      | 3.808901  | 3.593469  | 1.281282  | H      | -4.305781 | 0.766252  | -0.363387 | 281    |           |           |           |
| H      | 2.180190  | 3.721366  | 1.368223  | S      | -5.337865 | -0.197394 | 1.587790  |        |           |           |           |

|        |                               |        |        |                               |
|--------|-------------------------------|--------|--------|-------------------------------|
| ProAsp |                               | 283    |        | ProAsn                        |
| N      | -4.012810 -1.133620 -0.509587 | ProAla | N      | -3.772455 -0.970486 -0.595963 |
| C      | -4.888296 -0.841240 0.622609  | N      | C      | -4.737895 -0.621414 0.444974  |
| C      | -3.057236 -0.043307 -0.645556 | C      | C      | -2.750417 0.066332 -0.652467  |
| H      | -4.457054 -1.135811 1.595043  | C      | H      | -4.443855 -0.978775 1.446491  |
| H      | -5.847532 -1.358731 0.512121  | H      | H      | -5.722513 -1.044979 0.216950  |
| C      | -5.022501 0.674076 0.559271   | C      | C      | -4.733690 0.901429 0.423870   |
| C      | -3.587256 1.102698 0.252401   | H      | C      | -3.244476 1.206453 0.270026   |
| H      | -3.006864 0.289359 -1.694421  | C      | H      | -2.641015 0.439516 -1.683316  |
| C      | -1.647959 -0.481115 -0.247858 | H      | C      | -1.387900 -0.471552 -0.216402 |
| H      | -5.412116 1.113356 1.481651   | C      | H      | -5.173222 1.346652 1.320657   |
| H      | -5.688963 0.951784 -0.264291  | H      | H      | -5.289548 1.262722 -0.448365  |
| H      | -3.007744 1.152313 1.181617   | H      | H      | -2.750550 1.140816 1.246875   |
| H      | -3.517756 2.081821 -0.229825  | H      | H      | -3.038372 2.200230 -0.137763  |
| O      | -1.406186 -1.603846 0.180494  | O      | O      | -1.248415 -1.602443 0.236526  |
| H      | -3.496120 -1.997627 -0.368123 | H      | H      | -3.314364 -1.855724 -0.395617 |
| N      | -0.679338 0.449718 -0.421891  | H      | N      | -0.351623 0.381759 -0.388291  |
| H      | -0.897021 1.392943 -0.715822  | H      | H      | -0.514417 1.341419 -0.665385  |
| C      | 0.685582 0.211180 -0.030163   | C      | C      | 0.981528 0.098789 0.087927    |
| H      | 0.718256 -0.233589 0.971871   | H      | H      | 0.971070 -0.182730 1.151833   |
| C      | 1.393602 -0.762358 0.939293   | C      | C      | 1.646300 -1.071059 -0.644123  |
| C      | 1.378318 1.560941 0.008243    | C      | C      | 1.763802 1.393669 -0.036204   |
| H      | 0.758508 -1.653775 -1.035963  | H      | H      | 0.873676 -1.839080 -0.764207  |
| H      | 1.470691 -0.333801 -1.994631  | H      | H      | 1.996504 -0.778199 -1.639680  |
| C      | 2.772166 -1.188799 -0.556420  | C      | C      | 2.757551 -1.691797 0.187045   |
| O      | 0.861307 2.601062 -0.333732   | O      | O      | 1.263128 2.461815 -0.316368   |
| O      | 3.759858 -1.166617 -1.250191  | O      | O      | 2.781954 -1.628720 1.403405   |
| C      | 2.631498 1.453665 0.444062    | C      | N      | 3.705535 -2.352439 -0.529323  |
| C      | 3.385630 2.668760 0.445794    | H      | H      | 4.382927 -2.891934 -0.016707  |
| H      | 4.380365 2.396343 0.794650    | H      | H      | 3.617197 -2.501199 -1.519370  |
| H      | 3.433642 3.088446 -0.561224   | O      | O      | 3.061169 1.218344 0.195879    |
| H      | 2.927606 3.399627 1.115934    | C      | C      | 3.858488 2.401682 0.130744    |
| O      | 2.759745 -1.641011 1.08096    | H      | H      | 4.876709 2.080863 0.345372    |
| C      | 4.025589 -2.065828 1.205529   | H      | H      | 3.795896 2.852722 -0.862384   |
| H      | 4.735527 -1.234669 1.206495   | H      | H      | 3.521236 3.129946 0.871755    |
| H      | 3.844486 -2.414419 2.221846   |        |        |                               |
| H      | 4.431512 -2.872334 0.590239   |        |        |                               |
| 282    |                               | 284    |        | 286                           |
| ProGlu |                               | ProArg |        | ProCys                        |
| N      | -3.795299 -1.864493 -0.093933 | N      | N      | 3.697828 -0.960273 0.341449   |
| C      | -4.939493 -1.371773 0.668059  | C      | C      | 4.564893 -0.318594 -0.643586  |
| C      | -3.066858 -0.718051 -0.619359 | C      | H      | 2.600715 -0.053317 0.649201   |
| H      | -4.684501 -1.084728 1.703060  | H      | H      | 4.213480 -0.444341 -1.682344  |
| H      | -5.726730 -2.132075 0.716644  | C      | H      | 5.581229 -0.723130 -0.584000  |
| C      | -5.357102 -0.136939 -0.118382 | C      | C      | 4.489246 1.150336 -0.250720   |
| C      | -4.004980 0.501840 -0.439548  | H      | C      | 2.999130 1.317538 0.047333    |
| H      | -2.841266 -0.868608 -1.686931 | H      | H      | 2.474601 0.034738 1.740080    |
| C      | -1.727964 -0.532144 0.095329  | O      | C      | 1.275371 -0.567183 0.087978   |
| H      | -6.022640 0.527590 0.439326   | H      | H      | 4.847642 1.826380 -1.031748   |
| H      | -5.864646 -0.440997 -1.040020 | H      | H      | 5.082232 1.322118 0.653960    |
| H      | -3.672168 1.113029 0.407540   | O      | H      | 2.452060 1.492892 -0.886398   |
| H      | -4.027481 1.149273 -1.320743  | H      | H      | 2.778377 2.152466 0.718328    |
| O      | -1.369538 -1.260656 1.013530  | C      | O      | 1.198404 -1.593657 -0.577022  |
| H      | -3.162065 -2.404185 0.490495  | H      | H      | 3.306543 -1.828504 -0.014238  |
| N      | -0.955252 0.479478 -0.367173  | C      | N      | 0.186436 0.179269 0.394257    |
| H      | -1.276641 1.107168 -1.091688  | C      | H      | 0.265039 1.049535 0.904282    |
| C      | 0.318221 0.792812 0.233146    | H      | C      | -1.123346 -0.136663 -0.116965 |
| H      | 0.231747 0.701201 1.322781    | C      | H      | -1.062107 -0.394093 -1.181262 |
| C      | 1.414701 -0.177942 -0.250402  | C      | C      | -1.710751 -1.346288 0.631085  |
| C      | 0.625908 2.234603 -0.123471   | O      | C      | -1.971276 1.112121 0.049470   |
| H      | 0.996303 -1.181369 -0.141055  | H      | H      | -0.966136 -2.138599 0.542749  |
| H      | 1.590316 -0.009567 -1.319794  | H      | H      | -1.844278 -1.094113 1.687096  |
| C      | 2.722372 -0.095667 0.533370   | C      | S      | -3.281088 -1.945477 -0.092703 |
| O      | 0.076970 2.842221 -1.015837   | H      | O      | -1.634637 2.076102 0.701044   |
| H      | 3.187236 0.888663 0.467094    | H      | H      | -3.067961 -3.239374 0.201636  |
| H      | 2.519005 -0.289093 1.595070   | N      | O      | -3.131701 1.004215 -0.589144  |
| C      | 3.756372 -1.098461 0.083713   | H      | C      | -4.029887 2.104897 -0.426276  |
| O      | 4.921506 -0.850604 -0.118462  | H      | H      | -4.922530 1.839228 -0.989892  |
| O      | 1.585375 2.749073 0.647302    | C      | H      | -4.269340 2.248365 0.629606   |
| C      | 1.961171 0.093546 0.334046    | N      | H      | -3.582392 3.020730 -0.818699  |
| H      | 2.746901 4.351615 1.042450    | N      |        |                               |
| H      | 2.330622 4.158856 -0.691721   | H      | 287    |                               |
| H      | 1.105729 4.763259 0.446137    | H      | ProPhe |                               |
| O      | 3.230060 -2.327895 -0.048343  | H      | N      | 4.200789 -1.445662 0.489458   |
| C      | 4.153986 -3.338140 -0.446502  | O      | C      | 5.120372 -1.221964 -0.622979  |
| H      | 3.575071 -4.258335 -0.519279  | C      | C      | 3.389925 -0.248252 0.663835   |
| H      | 4.604991 -3.090924 -1.410721  | H      | H      | 4.669046 -1.422012 -1.610346  |
| H      | 4.951090 -3.444876 0.293580   | H      | H      | 6.005587 -1.860140 -0.525684  |
|        |                               | H      | C      | 5.443665 0.260475 -0.498094   |
|        |                               | H      | C      | 4.070104 0.854706 -0.185195   |
|        |                               |        | H      | 3.372398 0.047775 1.724724    |
|        |                               | 285    |        |                               |

|        |           |           |           |        |           |           |           |        |           |           |           |
|--------|-----------|-----------|-----------|--------|-----------|-----------|-----------|--------|-----------|-----------|-----------|
| C      | 1.939831  | -0.487982 | 0.244842  | N      | 0.716275  | 0.355789  | 0.368777  | O      | 1.575630  | -1.436668 | -0.894242 |
| H      | 5.897257  | 0.681964  | -1.399325 | H      | 0.967148  | 1.081906  | 1.026013  | H      | 3.585447  | -2.159913 | -0.389464 |
| H      | 6.129549  | 0.419589  | 0.340870  | C      | -0.592788 | 0.455692  | -0.229507 | N      | 0.864925  | 0.260045  | 0.420901  |
| H      | 3.512448  | 1.011095  | -1.115988 | H      | -0.499076 | 0.290860  | -1.310252 | H      | 1.056118  | 0.899503  | 1.179729  |
| H      | 4.117789  | 1.816336  | 0.333512  | C      | -1.562069 | -0.595956 | 0.348354  | C      | -0.495898 | 0.227047  | -0.065173 |
| O      | 1.561133  | -1.558802 | -0.219655 | C      | -1.076868 | 1.871302  | 0.016821  | H      | -0.480531 | 0.042340  | -1.142460 |
| H      | 3.578655  | -2.229064 | 0.308237  | H      | -0.986324 | -1.522614 | 0.428281  | C      | -1.289370 | -0.891140 | 0.636929  |
| N      | 1.096540  | 0.552850  | 0.435781  | H      | -1.869691 | -0.318010 | 1.361354  | C      | -1.090983 | 1.591973  | 0.225949  |
| H      | 1.417833  | 1.447186  | 0.781362  | C      | -2.798814 | -0.849383 | -0.502197 | H      | -0.713860 | -1.810494 | 0.470644  |
| C      | -0.288987 | 0.473694  | 0.049588  | O      | -0.567704 | 2.635238  | 0.806099  | H      | -1.266177 | -0.683095 | 1.714740  |
| H      | -0.364804 | -0.013054 | -0.929113 | H      | -3.307760 | 0.094889  | -0.728916 | C      | -2.697853 | -1.060928 | 0.172945  |
| C      | -1.118939 | -0.358594 | 1.062853  | H      | -2.516723 | -1.293870 | -1.464389 | O      | -0.872278 | 2.195231  | 1.257866  |
| C      | -0.801929 | 1.894996  | -0.058388 | C      | -3.798601 | -1.725430 | 0.235218  | N      | -3.626913 | -1.741435 | 0.927674  |
| H      | -0.485624 | -1.214562 | 1.315146  | O      | -3.961278 | -1.659806 | 1.441877  | C      | -3.380502 | -0.712306 | -0.967386 |
| H      | -1.260520 | 0.226164  | 1.978662  | N      | -4.534039 | -2.553943 | -0.552902 | H      | -3.464984 | -2.150511 | 1.833512  |
| C      | -2.433314 | -0.856289 | 0.526785  | H      | -5.201963 | -3.159764 | -0.104900 | C      | -4.791516 | -1.769423 | 0.225400  |
| O      | -0.227425 | 2.857513  | 0.403808  | H      | -4.338070 | -2.680913 | -1.529949 | N      | -4.678603 | -1.153275 | -0.924493 |
| C      | -3.651132 | -0.336417 | 0.966720  | O      | -2.146544 | 2.174098  | -0.723760 | H      | -3.006663 | -0.152309 | -1.812431 |
| C      | -2.444232 | -1.872338 | -0.434401 | C      | -2.689664 | 3.477927  | -0.496993 | H      | -5.684223 | -2.248106 | 0.604872  |
| H      | -3.655857 | 0.449663  | 1.718397  | H      | -3.541429 | 3.563189  | -1.170327 | O      | -1.865098 | 2.037307  | -0.754391 |
| C      | -4.855236 | -0.816666 | 0.458964  | H      | -3.008371 | 3.584258  | 0.542284  | C      | -2.517844 | 3.284543  | -0.502009 |
| C      | -3.644878 | -2.350278 | -0.947494 | H      | -1.944543 | 4.244771  | -0.719717 | H      | -3.104387 | 3.494943  | -1.394819 |
| H      | -1.498061 | -2.292190 | -0.770208 |        |           |           |           | H      | -3.166991 | 3.202839  | 0.372453  |
| H      | -5.795006 | -0.405059 | 0.816590  |        |           |           |           | H      | -1.780872 | 4.071629  | -0.327798 |
| C      | -4.855113 | -1.823221 | -0.501927 | 290    |           |           |           |        |           |           |           |
| H      | -3.636901 | -3.141998 | -1.691348 | ProIle |           |           |           | 292    |           |           |           |
| H      | -5.793661 | -2.199881 | -0.898304 | N      | 3.767681  | -1.157296 | 0.066189  | ProLeu |           |           |           |
| O      | -1.968855 | 1.953421  | -0.693748 | C      | 4.597563  | -0.310774 | -0.784999 | N      | -3.788120 | -1.203799 | -0.217247 |
| C      | -2.552405 | 3.254232  | -0.782687 | C      | 2.704203  | -0.328474 | 0.617077  | C      | -4.698085 | -0.528302 | 0.703994  |
| H      | -3.505012 | 3.113671  | -1.291182 | H      | 4.165005  | -0.137044 | -1.786201 | C      | -2.786134 | -0.241864 | -0.655959 |
| H      | -2.705755 | 3.675869  | 0.213393  | H      | 5.589217  | -0.755683 | -0.921322 | H      | -4.314064 | -0.476107 | 1.737658  |
| H      | -1.905891 | 3.924658  | -1.353838 | C      | 4.634765  | 0.996537  | -0.006130 | H      | -5.666977 | -1.038870 | 0.732875  |
|        |           |           |           | C      | 3.178684  | 1.137875  | 0.444381  | C      | -4.784858 | 0.874153  | 0.118134  |
| 288    |           |           |           | H      | 2.558456  | -0.560903 | 1.683392  | C      | -3.325881 | 1.151909  | -0.246654 |
| ProGly |           |           |           | C      | 1.365885  | -0.600530 | -0.075681 | H      | -2.662521 | -0.295480 | -1.749119 |
| N      | -3.079575 | 0.290793  | 0.892082  | H      | 4.981923  | 1.846464  | -0.600036 | C      | -1.418651 | -0.537341 | -0.036702 |
| C      | -3.917232 | -0.219142 | -0.189956 | H      | 5.294486  | 0.887361  | 0.860872  | H      | -5.199517 | 1.609306  | 0.813341  |
| C      | -1.705410 | -0.097332 | 0.605720  | H      | 2.592814  | 1.635918  | -0.336663 | H      | -5.408281 | 0.859672  | -0.822267 |
| H      | -3.870984 | 0.400539  | -1.101757 | O      | 3.066076  | 1.725553  | 1.359761  | H      | -2.785556 | 1.521470  | 0.632468  |
| H      | -4.963874 | -0.275661 | 0.127784  | H      | 1.243318  | -1.462998 | -0.937904 | H      | -3.209278 | 1.897162  | -1.038557 |
| C      | -3.304324 | -1.584959 | -0.459127 | H      | 3.340017  | -1.913374 | -0.462997 | O      | -1.246850 | -1.453275 | 0.760006  |
| C      | -1.804172 | -1.283824 | -0.392409 | N      | 0.323176  | 0.150940  | 0.352831  | H      | -3.308312 | -1.977572 | 0.235712  |
| H      | -1.206564 | -0.417194 | 1.534306  | H      | 0.461922  | 0.928073  | 0.984864  | N      | -0.412184 | 0.271903  | -0.440268 |
| C      | -0.910121 | 1.080061  | 0.031995  | C      | -0.981085 | 0.054431  | -0.259366 | H      | -0.571331 | 1.037463  | -1.080866 |
| H      | -3.608950 | -2.016278 | -1.416571 | H      | -0.853044 | -0.104580 | -1.337057 | C      | 0.931889  | 0.133293  | 0.071241  |
| H      | -3.588957 | -2.278621 | 0.338684  | C      | -1.793174 | -1.145268 | 0.300005  | H      | 0.876362  | -0.096393 | 1.140075  |
| H      | -1.437371 | -0.981322 | -1.380202 | C      | -1.661753 | 1.390805  | -0.036257 | C      | 1.679964  | -1.006611 | -0.651040 |
| H      | -1.214430 | -2.147645 | -0.073653 | H      | -1.083456 | -1.980238 | 0.231498  | C      | 1.611382  | 1.473092  | -0.120720 |
| O      | -1.449185 | 2.147233  | -0.224725 | C      | -2.161413 | -0.933870 | 1.765221  | H      | 1.030773  | -1.884750 | -0.549187 |
| H      | -3.119047 | 1.306579  | 0.924676  | C      | -2.995570 | -1.497960 | -0.579989 | H      | 1.719340  | -0.758755 | -1.719613 |
| N      | 0.421681  | 0.895499  | -0.170256 | O      | -1.283752 | 2.218768  | 0.764092  | C      | 3.081161  | -1.365205 | -0.146975 |
| H      | 0.939552  | 1.695231  | -0.514767 | H      | -2.929273 | -0.158748 | 1.878011  | O      | 1.247383  | 2.309678  | -0.917852 |
| C      | 1.208739  | -0.254806 | 0.166073  | H      | -2.551895 | -1.852352 | 2.211108  | H      | 3.739274  | -0.497174 | -0.286715 |
| C      | 2.669613  | 0.074804  | -0.606734 | H      | -1.287786 | -0.630429 | 2.350053  | C      | 3.088756  | -1.728308 | 1.336712  |
| H      | 1.083281  | -0.566724 | 1.211953  | H      | -3.747594 | -0.702735 | -0.519767 | C      | 3.635204  | -2.514852 | -0.987251 |
| H      | 0.975379  | -1.133057 | -0.450817 | H      | -2.665721 | -1.525770 | -1.626586 | H      | 2.367892  | -2.526994 | 1.547559  |
| O      | 3.080042  | 1.135438  | -0.453670 | C      | -3.631888 | -2.837424 | -0.225530 | H      | 4.078692  | -2.082534 | 1.642572  |
| C      | 3.439349  | -0.967424 | 0.269220  | H      | -4.066961 | -2.831517 | 0.778697  | H      | 2.840059  | -0.870709 | 1.968340  |
| C      | 4.843009  | -0.758159 | 0.094038  | H      | -4.434879 | -3.084783 | -0.926432 | H      | 3.635236  | -2.263053 | -0.205069 |
| H      | 5.188230  | 0.065625  | 0.722848  | O      | -2.895816 | -3.647956 | -0.264954 | H      | 4.656566  | -2.766859 | -0.684165 |
| H      | 5.319096  | -1.691864 | 0.389893  | C      | -2.734551 | 1.549645  | -0.813812 | H      | 3.021193  | -3.415288 | -0.867985 |
| H      | 5.067638  | -0.525484 | -0.949349 | C      | -3.440235 | 2.778676  | -0.628160 | O      | 2.672114  | 1.618788  | 0.676738  |
|        |           |           |           | H      | -4.276695 | 2.746034  | -1.324931 | C      | 3.391222  | 2.843145  | -0.511285 |
| 289    |           |           |           | H      | -3.798536 | 2.864845  | 0.400229  | H      | 4.213569  | 2.800528  | 1.224046  |
| ProGln |           |           |           | H      | -2.790264 | 3.628885  | -0.847125 | H      | 3.770472  | 2.930776  | -0.509462 |
| N      | 3.850471  | -1.589901 | 0.170103  |        |           |           |           | H      | 2.743540  | 3.697244  | 0.721444  |
| C      | 4.824115  | -0.957717 | -0.714376 | 291    |           |           |           | 293    |           |           |           |
| C      | 2.965285  | -0.548291 | 0.672334  | ProHis |           |           |           | ProLys |           |           |           |
| H      | 4.427976  | -0.747465 | -1.723531 | N      | 4.117138  | -1.460434 | 0.121968  | N      | 3.917343  | -1.874625 | 0.110878  |
| H      | 5.710517  | -1.591260 | -0.827221 | C      | 5.113630  | -0.817038 | -0.731052 | C      | 4.925834  | -1.291434 | -0.768436 |
| C      | 5.116073  | 0.350698  | 0.006468  | C      | 3.193355  | -0.441376 | 0.600473  | C      | 3.124015  | -0.783622 | 0.659434  |
| C      | 3.716591  | 0.789901  | 0.445056  | H      | 4.776244  | -0.687755 | -1.773830 | H      | 4.533469  | -1.017552 | -1.763659 |
| H      | 2.770815  | -0.702541 | 1.744840  | H      | 6.039747  | -1.401974 | -0.750200 | H      | 5.757505  | -1.988743 | -0.916387 |
| C      | 1.605462  | -0.583316 | -0.029971 | C      | 5.288967  | 0.545698  | -0.075325 | C      | 5.330972  | -0.035499 | -0.010149 |
| H      | 5.617282  | 1.090955  | -0.623141 | C      | 3.844415  | 0.921291  | 0.255032  | C      | 3.977907  | 0.497514  | 0.468436  |
| H      | 5.746861  | 0.155235  | 0.879835  | H      | 3.060140  | -0.530868 | 1.690774  | H      | 2.928629  | -0.959320 | 1.728603  |
| H      | 3.235536  | 1.362786  | -0.355851 | C      | 1.811928  | -0.596437 | -0.035224 | C      | 1.757979  | -0.686176 | -0.026419 |
| H      | 3.724053  | 1.422303  | 1.337166  | H      | 5.784050  | 1.276102  | -0.720996 | H      | 5.879469  | 0.684144  | -0.624080 |
| O      | 1.331315  | -1.424127 | -0.879604 | H      | 5.877010  | 0.441259  | 0.842813  | H      | 5.958035  | -0.309806 | 0.844500  |
| H      | 3.286165  | -2.274119 | -0.327670 | H      | 3.362202  | 1.355459  | -0.628393 |        |           |           |           |
|        |           |           |           | H      | 3.755891  | 1.648274  | 1.067284  |        |           |           |           |

|        |           |           |           |        |           |           |           |        |           |           |           |
|--------|-----------|-----------|-----------|--------|-----------|-----------|-----------|--------|-----------|-----------|-----------|
| H      | 3.532762  | 1.137080  | -0.302091 | H      | -0.836883 | 1.083235  | -0.834378 | H      | 1.855794  | 1.462942  | 0.734190  |
| H      | 4.049526  | 1.093006  | 1.382874  | C      | -0.798651 | -1.038028 | -0.549286 | C      | 0.069826  | 0.588780  | 0.066517  |
| O      | 1.407070  | -1.478555 | -0.893383 | H      | -3.629179 | 0.787680  | 2.205398  | H      | -0.065006 | 0.078898  | -0.893810 |
| H      | 3.293385  | -2.493833 | -0.400936 | H      | -3.362573 | 2.064106  | 1.000901  | C      | -0.785545 | -0.153931 | 1.128071  |
| N      | 0.956750  | 0.315201  | 0.406886  | H      | -1.480844 | -0.196208 | 1.777613  | C      | -0.348724 | 2.037392  | -0.071742 |
| H      | 1.269864  | 0.985563  | 1.095663  | H      | -1.065325 | 1.495552  | 1.484555  | H      | -0.206913 | -1.046850 | 1.383839  |
| C      | -0.351834 | 0.543707  | -0.159903 | O      | -1.393489 | -1.954435 | -1.105183 | H      | -0.849345 | 0.463730  | 2.031084  |
| H      | -0.305357 | 0.368659  | -1.240858 | H      | -2.840771 | -0.412176 | -1.635495 | C      | -2.151627 | -0.563327 | 0.625996  |
| C      | -1.400347 | -0.412222 | 0.444020  | N      | 0.475078  | -1.206938 | -0.098247 | O      | 0.290985  | 2.969925  | 0.366103  |
| C      | -0.687491 | 1.999018  | 0.096672  | C      | 1.127096  | -2.506994 | -0.225429 | C      | -3.311937 | 0.062082  | 1.104575  |
| H      | -0.960188 | -1.411981 | 0.361994  | C      | 1.319786  | -0.219972 | 0.552216  | C      | -2.284053 | -1.608611 | -0.269104 |
| H      | -1.499329 | -0.191254 | 1.514857  | H      | 1.563505  | -2.619713 | -1.226612 | H      | -3.238893 | 0.873093  | 1.825404  |
| C      | -2.765025 | -0.406644 | -0.234993 | H      | 0.387873  | -3.298867 | -0.091925 | C      | -4.568208 | -0.334923 | 0.656022  |
| O      | -0.167921 | 2.671040  | 0.960744  | C      | 2.199106  | -2.451697 | 0.853391  | C      | -3.527562 | -2.012499 | -0.730505 |
| H      | -3.228610 | 0.583824  | -0.153658 | C      | 2.635057  | -0.988640 | 0.816713  | H      | -1.389535 | -2.117709 | 0.622231  |
| H      | -2.632472 | -0.591529 | -1.309869 | H      | 0.884468  | 0.128885  | 1.494621  | H      | -5.462436 | 0.162620  | 1.026952  |
| C      | -3.700396 | -1.460500 | 0.348133  | C      | 1.614205  | 0.987714  | -0.324080 | C      | -4.679615 | -1.373850 | -0.266963 |
| H      | -3.260998 | -2.460266 | 0.248611  | H      | 3.026133  | -3.141313 | 0.666576  | H      | -3.629745 | -2.825668 | -1.441749 |
| H      | -3.821318 | -1.283654 | 1.427319  | H      | 1.763891  | -2.697738 | 1.828347  | O      | -5.874033 | -1.809455 | -0.745026 |
| C      | -5.072273 | -1.469916 | -0.311062 | H      | 3.319275  | -0.829791 | -0.023955 | H      | -6.579187 | -1.298052 | -0.335774 |
| H      | -5.509108 | -0.455681 | -0.243037 | H      | 3.127262  | -0.643298 | 1.728412  | O      | -1.513923 | 2.160551  | -0.701994 |
| H      | -4.950628 | -1.679341 | -1.381541 | O      | 1.752694  | 0.963440  | -1.521894 | C      | -2.007311 | 3.496071  | -0.815321 |
| N      | -5.906243 | -2.519770 | 0.257190  | O      | 1.758027  | 2.087265  | 0.430850  | H      | -2.134062 | 3.944521  | 0.172833  |
| H      | -6.114050 | -2.302907 | 1.227417  | C      | 2.116717  | 3.267098  | -0.290396 | H      | -1.315552 | 4.111516  | -1.395261 |
| H      | -6.799383 | -2.554367 | -0.222775 | H      | 1.344674  | 3.517465  | -1.021835 | H      | -2.966071 | 3.412154  | -1.324881 |
| O      | -1.634360 | 2.451949  | -0.727500 | H      | 2.207432  | 4.055577  | 0.455734  |        |           |           |           |
| C      | -2.028592 | 3.808494  | -0.509541 | H      | 3.063875  | 3.123093  | -0.815739 |        |           |           |           |
| H      | -2.795025 | 4.015930  | -1.255041 |        |           |           |           | 298    |           |           |           |
| H      | -2.428174 | 3.935735  | 0.499252  |        |           |           |           | ProThr |           |           |           |
| H      | -1.175769 | 4.478858  | -0.637888 |        |           |           |           | N      | -3.598656 | 0.724250  | -0.265054 |
|        |           |           |           | 296    |           |           |           | C      | -4.074746 | -0.567528 | -0.750327 |
|        |           |           |           | ProSer |           |           |           | C      | -2.406481 | 0.462755  | 0.526554  |
|        |           |           |           | N      | -3.545938 | 0.841954  | 0.136901  | H      | -3.471246 | -0.968508 | -1.583612 |
|        |           |           |           | C      | -4.288318 | -0.077475 | -0.721133 | H      | -5.112841 | -0.492313 | -1.090898 |
| 294    |           |           |           | C      | -2.364493 | 0.148549  | 0.631986  | C      | -3.912619 | -1.448621 | 0.480077  |
| ProMet |           |           |           | H      | -3.896181 | -0.126732 | -1.751865 | C      | -2.552882 | -0.999711 | 1.030726  |
| N      | -3.921700 | -1.666573 | -0.115277 | H      | -5.342551 | 0.214887  | -0.778141 | H      | -2.353191 | 1.163521  | 1.373130  |
| C      | -4.892094 | -1.050344 | 0.784051  | C      | -4.081721 | -1.417738 | -0.029347 | C      | -1.128917 | 0.673226  | -0.293295 |
| C      | -3.071545 | -0.609626 | -0.644185 | H      | -2.598405 | -1.354864 | 0.337774  | H      | -3.946433 | -2.517856 | 0.254441  |
| H      | -4.481917 | -0.826039 | 1.784440  | H      | -2.256135 | 0.310934  | 1.716198  | H      | -4.707594 | -1.221604 | 1.197334  |
| H      | -5.762181 | -1.702274 | 0.916824  | C      | -1.089372 | 0.680214  | -0.025109 | H      | -1.748760 | -1.626345 | 0.629488  |
| C      | -5.226201 | 0.247116  | 0.061755  | H      | -4.329511 | -2.274668 | -0.661693 | H      | -2.498414 | -1.066744 | 2.120642  |
| C      | -3.845557 | 0.713772  | -0.406955 | H      | -4.698369 | -1.464908 | 0.874513  | O      | -1.156701 | 1.105212  | -1.438934 |
| H      | -2.899255 | -0.766013 | -1.720326 | H      | -1.989734 | -1.670750 | -0.517289 | H      | -3.340819 | 1.331678  | -1.039106 |
| C      | -1.694692 | -0.611204 | 0.024627  | O      | -2.331832 | -1.995462 | 1.183172  | N      | 0.031793  | 0.393257  | 0.356540  |
| H      | -5.730768 | 0.980184  | 0.697050  | H      | -1.110038 | 1.569942  | -0.866662 | H      | 0.000016  | -0.110685 | 1.231156  |
| H      | -5.869655 | 0.033070  | -0.797893 | H      | -3.239786 | 1.665125  | -0.375633 | C      | 1.289910  | 0.361530  | -0.337470 |
| H      | -3.360486 | 1.299839  | 0.381922  | N      | 0.063809  | 0.110740  | 0.402541  | H      | 1.075282  | 0.468714  | -1.407154 |
| H      | -3.884353 | 1.342118  | -1.301159 | C      | 1.350515  | 0.483801  | -0.131790 | C      | 2.236596  | 1.495127  | 0.078462  |
| O      | -1.380528 | -1.439082 | 0.871728  | H      | 1.263241  | 0.694816  | -1.200959 | C      | 1.944449  | -0.989717 | -0.092888 |
| H      | -3.332670 | -2.335319 | 0.374732  | C      | 1.868679  | 1.743810  | 0.573156  | H      | 3.130252  | 1.412290  | -0.558905 |
| N      | -0.835962 | 0.345366  | -0.403150 | C      | 2.291359  | -0.682224 | 0.099531  | C      | 1.601971  | 2.862301  | -0.098588 |
| H      | -1.118803 | 1.058263  | -1.061800 | H      | 1.130807  | 2.534827  | 0.382914  | O      | 2.567609  | 1.234508  | 1.431689  |
| C      | 0.486900  | 0.478712  | 0.155970  | H      | 1.893425  | 1.542591  | 1.656053  | O      | 1.494404  | -1.848835 | 0.627845  |
| H      | 0.437489  | 0.289705  | 1.235016  | O      | 3.140564  | 2.054562  | 0.060006  | H      | 0.725802  | 2.953262  | 0.548362  |
| C      | 1.461828  | -0.539329 | -0.473706 | O      | 2.183370  | -1.440657 | 1.039701  | H      | 2.314386  | 3.651727  | 0.166304  |
| C      | 0.918326  | 1.913094  | -0.080782 | H      | 3.399070  | 2.913757  | 0.404587  | H      | 1.286060  | 3.022799  | -1.133138 |
| H      | 0.942052  | -1.501943 | -0.443622 | O      | 3.237126  | -0.763552 | -0.828810 | H      | 3.122276  | 1.954430  | 1.747242  |
| H      | 1.617562  | -0.281701 | -1.528043 | C      | 4.203696  | -1.793984 | -0.619939 | O      | 3.084139  | -1.108357 | -0.780642 |
| C      | 2.794565  | -0.669430 | 0.250213  | H      | 4.893560  | -1.724847 | -0.459751 | C      | 3.783350  | -2.336703 | -0.578293 |
| O      | 0.397214  | 2.652698  | -0.885621 | H      | 4.731327  | -1.636494 | 0.323583  | H      | 4.677698  | -2.274145 | -1.197189 |
| H      | 3.342990  | 0.276955  | 0.248390  | H      | 3.721057  | -2.773882 | -0.596652 | H      | 4.051085  | -2.454266 | 0.474299  |
| H      | 2.625282  | -0.960962 | 1.293662  |        |           |           |           | H      | 3.165080  | -3.184671 | -0.882216 |
| S      | 3.800294  | -1.942751 | -0.569685 |        |           |           |           |        |           |           |           |
| C      | 5.267852  | -1.879642 | 0.482934  |        |           |           |           |        |           |           |           |
| H      | 5.028936  | -2.147670 | 1.515916  | 297    |           |           |           |        |           |           |           |
| H      | 5.977910  | -2.610016 | 0.089144  | ProTyr |           |           |           |        |           |           |           |
| H      | 5.734938  | -0.890953 | 0.458521  | N      | 4.422554  | -1.622068 | 0.514576  | 299    |           |           |           |
| O      | 1.950988  | 2.261700  | 0.689729  | C      | 5.361194  | -1.537109 | -0.601922 | ProTrp |           |           |           |
| C      | 2.434885  | 3.592579  | 0.488269  | C      | 3.707181  | -0.357276 | 0.617189  | N      | 4.327409  | -1.653291 | 0.767646  |
| H      | 3.265986  | 3.711717  | 1.181930  | H      | 4.903211  | -1.782632 | -1.575567 | C      | 5.153953  | -1.864806 | -0.417592 |
| H      | 2.770499  | 3.727065  | -0.542470 | H      | 6.205077  | -2.219172 | -0.449622 | C      | 3.746803  | -0.319856 | 0.688360  |
| H      | 1.648391  | 4.319724  | 0.701876  | H      | 5.776610  | -0.072171 | -0.586236 | H      | 4.576028  | -2.187262 | -1.301080 |
|        |           |           |           | C      | 4.443146  | 0.627199  | -0.324746 | H      | 5.919204  | -2.624381 | -0.223358 |
| 295    |           |           |           | H      | 3.740407  | 0.016309  | 1.653076  | C      | 5.741234  | -0.482448 | -0.665116 |
| ProPro |           |           |           | C      | 2.234304  | -0.516084 | 0.243365  | C      | 4.529367  | 0.419003  | -0.427012 |
| N      | -2.794058 | 0.346713  | -0.960191 | H      | 6.255441  | 0.251590  | -1.514395 | H      | 3.868489  | 0.205067  | 1.648993  |
| C      | -3.771332 | 0.152267  | 0.105192  | H      | 6.471304  | 0.107077  | 0.241517  | C      | 2.246503  | -0.376868 | 0.397811  |
| C      | -1.470548 | 0.327686  | -0.349553 | H      | 3.889402  | 0.733632  | -1.265022 | H      | 6.171025  | -0.366659 | -1.663871 |
| H      | -3.852434 | -0.898104 | 0.435284  | H      | 4.549070  | 1.625779  | 0.108591  | H      | 6.522780  | -0.276327 | 0.073971  |
| H      | -4.764406 | 0.482465  | -0.218082 | O      | 1.775242  | -1.574067 | -0.175741 | H      | 3.923015  | 0.475306  | -1.338473 |
| C      | -3.195993 | 1.005613  | 1.225257  | H      | 3.741274  | -2.363236 | 0.373148  | H      | 4.794567  | 1.442349  | -0.146966 |
| C      | -1.702272 | 0.673380  | 1.147552  | N      | 1.467949  | 0.585407  | 0.415105  | O      | 1.662333  | -1.438573 | 0.201769  |
|        |           |           |           |        |           |           |           | H      | 3.570019  | -2.329615 | 0.818146  |

|        |           |           |           |        |           |           |           |        |           |           |           |
|--------|-----------|-----------|-----------|--------|-----------|-----------|-----------|--------|-----------|-----------|-----------|
| N      | 1.610958  | 0.816014  | 0.386946  | O      | 1.529982  | -1.983802 | -0.456134 | C      | -0.995027 | -0.837195 | 0.027037  |
| H      | 2.109309  | 1.684970  | 0.525361  | H      | 3.547296  | -2.446404 | -0.685489 | H      | -0.944183 | -1.360553 | -0.936532 |
| C      | 0.202040  | 0.926303  | 0.099629  | H      | 4.919780  | -2.052971 | 0.128121  | C      | -1.343082 | -1.867046 | 1.106047  |
| H      | -0.054422 | 0.258626  | -0.729468 | N      | 1.122869  | 0.148208  | 0.184653  | C      | -2.056060 | 0.239564  | -0.079692 |
| C      | -0.664829 | 0.530020  | 1.327032  | H      | 1.528433  | 1.045106  | 0.445733  | H      | -1.401129 | -1.390346 | 2.088992  |
| C      | -0.050692 | 2.360352  | -0.313113 | C      | -0.288548 | 0.066084  | -0.078019 | H      | -2.298098 | -2.349877 | 0.886656  |
| H      | -0.179023 | -0.358626 | 1.744547  | H      | -0.457766 | -0.436470 | -1.038500 | H      | -0.556955 | -2.624458 | 1.126135  |
| H      | -0.596098 | 1.320970  | 2.082582  | H      | -1.022666 | -0.752821 | 0.102512  | O      | -1.868832 | 1.419473  | 0.113680  |
| C      | -2.084181 | 0.213184  | 1.002197  | C      | -0.818820 | 1.484879  | -0.172462 | O      | -3.242455 | -0.281987 | -0.407359 |
| O      | 0.707660  | 3.275568  | -0.069926 | H      | -0.498020 | -1.713108 | 1.055783  | C      | -4.308627 | 0.661273  | -0.513934 |
| C      | -3.203275 | 0.929365  | 1.330699  | H      | -0.960400 | -0.261596 | 1.975695  | H      | -5.191297 | 0.081256  | -0.780500 |
| C      | -1.885423 | -2.028065 | -0.321357 | C      | -2.474828 | -1.032833 | 0.709278  | H      | -4.461340 | 1.178084  | 0.436516  |
| C      | -2.540641 | -0.934095 | 0.264394  | O      | -0.153644 | 2.481039  | -0.003433 | H      | -4.089560 | 1.402673  | -1.286090 |
| H      | -3.288961 | 1.852674  | 1.887583  | O      | -3.387452 | -0.856808 | 1.479881  |        |           |           |           |
| N      | -4.324456 | 0.301854  | 0.839728  | O      | -2.122875 | 1.495248  | -0.453309 |        |           |           |           |
| C      | -3.951540 | -0.845276 | 0.182749  | O      | -2.726922 | 2.789066  | -0.503685 | 304    |           |           |           |
| C      | -2.647587 | -2.987596 | -0.967803 | H      | -3.783365 | 2.612990  | -0.700305 | SerArg |           |           |           |
| H      | -0.802819 | -2.117040 | -0.261158 | H      | -2.595367 | 3.309274  | 0.447555  | N      | 4.867599  | -2.001374 | -0.624075 |
| H      | -5.269681 | 0.614103  | 0.974376  | H      | -2.280538 | 3.387455  | -1.301257 | C      | 4.087748  | -1.140568 | 0.242340  |
| C      | -4.720707 | -1.811609 | -0.046727 | O      | -2.628272 | -1.550787 | -0.520412 | H      | 3.959044  | -1.538006 | 1.264584  |
| C      | -4.048132 | -2.879583 | -1.040682 | C      | -3.974078 | -1.842510 | -0.884367 | C      | 4.798128  | 0.205220  | 0.380331  |
| H      | -2.157894 | -3.841846 | -1.425974 | C      | -3.974078 | -1.842510 | -0.884367 | C      | 2.671739  | -1.020984 | -0.341389 |
| H      | -5.803034 | -1.733453 | -0.521975 | H      | -4.577415 | -0.930929 | -0.883435 | H      | 5.854975  | 0.009121  | 0.607373  |
| H      | -4.615747 | -3.650046 | -1.554498 | H      | -3.926356 | -2.267191 | -1.886718 | H      | 4.756621  | 0.731499  | -0.583459 |
| O      | -1.213381 | 2.503167  | -0.944043 | H      | -4.417739 | -2.556497 | -0.186245 | O      | 4.182787  | 0.949320  | 1.422050  |
| C      | -1.544386 | 3.842682  | -1.311190 |        |           |           |           | H      | 4.463823  | 1.866186  | 0.135485  |
| H      | -1.593119 | 4.483796  | -0.427705 | 302    |           |           |           | O      | 2.249802  | -1.844649 | -1.149189 |
| H      | -0.797319 | 4.247533  | -1.997967 | SerGlu |           |           |           | H      | 4.207549  | -2.528045 | -1.193140 |
| H      | -2.517641 | 3.782289  | -1.796254 | N      | 3.890583  | -2.400179 | -0.805635 | H      | 5.409825  | -2.661037 | -0.080932 |
|        |           |           |           | C      | 3.247925  | -1.507564 | 0.137289  | N      | 1.937351  | 0.015463  | 0.105587  |
|        |           |           |           | H      | 2.995686  | -1.984966 | 1.100472  | H      | 2.356118  | 0.680732  | 0.751421  |
| 300    |           |           |           | C      | 4.195192  | -0.350871 | 0.454265  | C      | 0.595757  | 0.244075  | -0.371253 |
| ProVal |           |           |           | C      | 1.912268  | -1.046465 | -0.463539 | H      | 0.547929  | -0.033416 | -1.430437 |
| N      | 3.658720  | -0.900029 | 0.092165  | H      | 5.180674  | -0.775411 | 0.689024  | C      | -0.430535 | -0.611220 | 0.399392  |
| C      | 4.447899  | 0.028652  | -0.711884 | H      | 4.307043  | 0.275173  | -0.441941 | C      | 0.317156  | 1.727455  | -0.231006 |
| C      | 2.499155  | -0.182595 | 0.605051  | O      | 3.679906  | 0.382000  | 1.556624  | H      | -0.021739 | -1.628505 | 0.391796  |
| H      | 4.065798  | 0.150480  | -1.740534 | H      | 4.143671  | 1.222175  | 1.613399  | H      | -0.447985 | -0.279791 | 1.445648  |
| H      | 5.488286  | -0.307791 | -0.779395 | O      | 1.383060  | -1.663623 | -1.383445 | C      | -1.838299 | -0.622688 | -0.182733 |
| C      | 4.296376  | 1.337680  | 0.505116  | H      | 3.174756  | -2.713308 | -1.458393 | O      | 0.921971  | 2.468874  | 0.511035  |
| C      | 2.808573  | 1.323224  | 0.405395  | H      | 4.262665  | -3.214235 | -0.333584 | H      | -2.288512 | 0.372969  | -0.150871 |
| H      | 2.358925  | -0.404044 | 1.674613  | N      | 1.362134  | 0.049289  | 0.096990  | H      | -1.793014 | -0.926386 | -1.238106 |
| C      | 1.215791  | -0.611888 | -0.109389 | H      | 1.874004  | 0.548871  | 0.821051  | C      | -2.749661 | -1.579193 | 0.582921  |
| H      | 4.588104  | 2.215458  | -0.533036 | O      | 0.122417  | 0.592711  | -0.395421 | H      | -2.329654 | -2.592573 | 0.579599  |
| H      | 4.906787  | 1.307375  | 0.958868  | H      | 0.095133  | 0.478266  | -1.486108 | H      | -2.828144 | -1.254404 | 1.624375  |
| H      | 2.222290  | 1.721553  | -0.430811 | C      | -1.087862 | -0.158345 | 0.196755  | N      | -4.100863 | -1.659724 | 0.065092  |
| H      | 2.567089  | 1.922687  | 1.287695  | C      | 0.113541  | 2.070644  | -0.053642 | H      | -4.178246 | -2.047397 | -0.864858 |
| O      | 1.216727  | -1.451977 | -1.002002 | H      | -0.872553 | -1.222011 | 0.068503  | C      | -4.982509 | -0.625244 | 0.308703  |
| H      | 3.325800  | -1.683326 | -0.464488 | H      | -1.135759 | 0.038312  | 1.274605  | N      | -4.661284 | 0.348820  | 1.077022  |
| N      | 0.079638  | -0.018549 | 0.328212  | C      | -2.422717 | 0.161824  | -0.472250 | N      | -6.182009 | -0.794884 | -0.384728 |
| H      | 0.106116  | 0.733798  | 1.003349  | O      | 0.840920  | 2.588698  | 0.762876  | H      | -5.463649 | 0.950413  | 1.248845  |
| C      | -1.196821 | -0.267050 | -0.299545 | H      | -2.693928 | 1.213676  | -0.376965 | H      | -6.510118 | -0.750886 | -0.410401 |
| H      | -1.048214 | -0.353385 | -1.382692 | H      | -2.349552 | -0.059847 | -1.545305 | H      | -6.909913 | -0.156106 | -0.102378 |
| C      | -1.832285 | -1.594457 | 0.195210  | C      | -3.577848 | -0.639022 | 0.075343  | O      | -0.693403 | 2.118907  | -1.011479 |
| C      | -2.061323 | 0.945343  | -0.015326 | O      | -4.654780 | -0.184838 | 0.381969  | C      | -1.068071 | 3.490398  | -0.874200 |
| H      | -1.014419 | -2.316822 | 0.086149  | O      | -0.810218 | 2.736505  | -0.753779 | H      | -1.897048 | 3.639808  | -1.564640 |
| C      | -2.228239 | -1.522468 | 1.666026  | C      | -0.909747 | 4.130672  | -0.453738 | H      | -1.380958 | 3.701224  | 0.150992  |
| C      | -2.985173 | -2.063158 | -0.685728 | H      | -1.703447 | 4.513867  | -1.093509 | H      | -0.230461 | 4.143365  | -1.130526 |
| O      | -1.813670 | 1.769974  | 0.837592  | H      | -1.158429 | 4.280262  | 0.599389  |        |           |           |           |
| H      | -3.077380 | -0.846287 | 1.822311  | H      | 0.035036  | 4.635005  | -0.668809 | 305    |           |           |           |
| H      | -2.524949 | -2.510228 | 2.031335  | O      | -3.277588 | -1.946476 | 0.165436  | SerAsn |           |           |           |
| H      | -1.398319 | -1.171157 | 2.286485  | C      | -4.333306 | -2.772589 | 0.650114  | N      | 4.073837  | -1.427772 | -0.316740 |
| H      | -2.684760 | -2.121758 | -1.736877 | H      | -3.931958 | -3.785371 | 0.673090  | C      | 3.194285  | -0.452469 | 0.294677  |
| H      | -3.309197 | -3.061465 | -0.375309 | H      | -4.641554 | -2.458945 | 1.650577  | H      | 3.263694  | -0.425998 | 1.395603  |
| H      | -3.847339 | -1.393600 | -0.619607 | H      | -5.200088 | -2.719383 | -0.013482 | C      | 3.573081  | 0.943487  | -0.203163 |
| O      | -3.137292 | 0.995189  | -0.802960 |        |           |           |           | C      | 1.739855  | -0.825549 | -0.034361 |
| C      | -4.014722 | 2.097300  | -0.560590 | 303    |           |           |           | H      | 4.662177  | 1.050369  | -0.111352 |
| H      | -4.830070 | 1.986893  | -1.274186 | SerAla |           |           |           | H      | 3.319495  | 1.023432  | -1.269231 |
| H      | -4.392979 | 2.069354  | 0.463887  | N      | 3.787851  | -0.539669 | -0.588632 | O      | 2.897756  | 1.917435  | 0.580479  |
| H      | -3.491578 | 3.043320  | -0.717458 | C      | 2.700408  | 0.046707  | 0.168318  | H      | 2.883346  | 2.748818  | 0.098010  |
|        |           |           |           | H      | 2.862391  | 0.031367  | 1.260053  | O      | 1.452124  | -1.940478 | -0.461029 |
| 301    |           |           |           | C      | 2.546933  | 1.513537  | -0.234310 | H      | 3.497381  | -2.219579 | -0.595664 |
| SerAsp |           |           |           | C      | 1.429264  | -0.779210 | -0.082173 | H      | 4.760993  | -1.759909 | 0.347340  |
| N      | 4.191123  | -1.687522 | -0.471417 | H      | 3.542717  | 1.976471  | -0.211275 | N      | 0.823014  | 0.133042  | 0.204294  |
| C      | 3.432259  | -0.658263 | 0.208858  | H      | 2.180860  | 1.562717  | -1.269197 | H      | 1.153114  | 1.065554  | 0.446762  |
| H      | 3.544731  | -0.675002 | 1.307240  | O      | 1.665050  | 2.157134  | 0.674779  | C      | -0.562342 | -0.032795 | -0.159974 |
| C      | 3.916165  | 0.712677  | -0.262740 | H      | 1.366760  | 2.983103  | 0.283658  | H      | -0.650815 | -0.404634 | -1.192465 |
| C      | 1.939933  | -0.895381 | -0.062684 | O      | 1.490645  | -1.911415 | -0.553561 | C      | -1.292110 | -1.061619 | 0.708542  |
| H      | 5.013179  | 0.721358  | -0.208560 | H      | 3.493923  | -1.476763 | -0.857756 | C      | -1.196157 | 1.345548  | -0.122923 |
| H      | 3.633702  | 0.848328  | -1.316013 | H      | 4.618882  | -0.624101 | -0.017589 | H      | -0.605322 | -1.907664 | 0.825469  |
| O      | 3.356208  | 1.714543  | 0.573970  | N      | 0.268861  | -0.189330 | 0.265688  | H      | -1.516301 | -0.662256 | 1.703403  |
| H      | 3.465339  | 2.570005  | 0.149094  | H      | 0.281932  | 0.782000  | 0.569460  | C      | -2.534630 | -1.600801 | 0.018510  |

|        |           |           |           |        |           |           |           |        |           |           |           |
|--------|-----------|-----------|-----------|--------|-----------|-----------|-----------|--------|-----------|-----------|-----------|
| O      | -0.571824 | 2.382135  | -0.069971 | H      | -1.146652 | 3.865048  | -1.523078 | N      | 0.751838  | 0.068674  | 0.057944  |
| O      | -2.645462 | -1.644684 | -1.193930 |        |           |           |           | H      | 1.022597  | 0.847123  | 0.654581  |
| N      | -3.497653 | -2.067467 | 0.856543  | 308    |           |           |           | C      | -0.617973 | -0.046103 | 0.377220  |
| H      | -4.286437 | -2.540324 | 0.446887  | SerGly |           |           |           | H      | -0.624688 | -0.333996 | -1.435246 |
| H      | -3.368375 | -2.107757 | 1.852080  | N      | 3.480718  | -0.518376 | -0.744863 | C      | -1.381324 | -1.144987 | 0.411754  |
| O      | -2.526568 | 1.282376  | -0.163376 | C      | 2.451082  | -0.018452 | 0.141661  | C      | -1.243410 | 1.328070  | -0.238564 |
| C      | -3.195527 | 2.542856  | -0.186551 | H      | 2.832728  | 0.022453  | 1.169265  | C      | -0.705904 | -2.008953 | 0.351387  |
| H      | -4.258855 | 2.310472  | -0.224495 | C      | 2.101785  | 1.428957  | -0.269680 | C      | -1.552762 | -0.827363 | 1.878269  |
| H      | -2.957803 | 3.121189  | 0.709553  | C      | 1.182613  | -0.867011 | 0.113851  | C      | -2.695547 | -1.550117 | -0.262490 |
| H      | -2.897607 | 3.117690  | -1.066511 | H      | 3.023817  | 2.012649  | -0.197718 | O      | -0.775867 | 2.231084  | 0.418938  |
|        |           |           |           | H      | 1.796371  | 1.426630  | -1.325926 | H      | -2.272162 | 0.058722  | 1.996750  |
| 306    |           |           |           | O      | 1.128267  | 2.027796  | 0.554924  | H      | -1.915830 | -1.606155 | 2.468605  |
| SerCys |           |           |           | H      | 0.254503  | 1.830907  | 0.180770  | H      | -0.602454 | -0.438700 | 2.314511  |
| N      | 4.040726  | -1.023725 | -0.629234 | O      | 0.954578  | -1.670205 | -0.778725 | H      | -3.420359 | -0.731067 | -0.188719 |
| C      | 3.082569  | -0.292042 | 0.173383  | H      | 3.008606  | -0.914511 | -1.555901 | H      | -2.508757 | -1.693934 | -1.334544 |
| H      | 3.177220  | -0.475733 | 1.258463  | H      | 3.949424  | -1.304245 | -0.306110 | C      | -3.299894 | -2.827363 | 0.309936  |
| C      | 3.293853  | 1.206335  | -0.038900 | N      | 0.306152  | -0.626912 | 1.138624  | H      | -3.590152 | -2.710129 | 1.358656  |
| C      | 1.672005  | -0.764121 | -0.206083 | H      | 0.474556  | 0.241203  | 1.634654  | H      | -4.197264 | -3.116735 | -0.245455 |
| H      | 4.366588  | 1.415981  | 0.070013  | C      | -1.056654 | -1.041071 | 0.982130  | H      | -2.590988 | -3.660713 | 0.251709  |
| H      | 3.006499  | 1.465950  | -1.067305 | C      | -1.866348 | -0.048143 | 0.167327  | O      | -2.389397 | 1.428069  | -0.920291 |
| O      | 2.534009  | 1.920804  | 0.925098  | H      | -1.070279 | -2.000982 | 0.458711  | C      | -3.052907 | -2.687322 | -0.803592 |
| H      | 2.491464  | 2.844954  | 0.663528  | H      | -1.544823 | -1.182652 | 1.951784  | H      | -3.961169 | 2.598783  | -1.398370 |
| O      | 1.492876  | -1.837180 | -0.774419 | O      | -1.452566 | 1.009694  | -0.260399 | H      | -3.295580 | 2.899977  | 0.240244  |
| H      | 3.568492  | -1.852147 | -0.985218 | O      | -3.110049 | -0.481013 | -0.016934 | H      | -2.419755 | 3.490654  | -1.187587 |
| H      | 4.825380  | -1.326202 | -0.066322 | C      | -3.957540 | 0.383802  | -0.778691 |        |           |           |           |
| N      | 0.660285  | 0.054687  | 0.148783  | H      | -3.548210 | 0.531562  | -1.780377 | 311    |           |           |           |
| H      | 0.872220  | 0.951483  | 0.582585  | H      | -4.922122 | -0.119144 | -0.828819 | SerHis |           |           |           |
| C      | -0.704154 | -0.257969 | -0.185938 | H      | -4.054132 | 1.354477  | -0.287180 | N      | 4.523412  | -1.126649 | -1.068111 |
| H      | -0.752857 | -0.673978 | -1.199259 |        |           |           |           | C      | 3.599078  | -0.837432 | 0.008649  |
| C      | -1.257345 | -1.315717 | 0.785776  | 309    |           |           |           | H      | 3.590599  | -1.603051 | 0.804314  |
| C      | -1.490617 | 1.039649  | -0.139412 | SerGln |           |           |           | C      | 4.005267  | 0.480149  | 0.668646  |
| H      | -0.564536 | -2.157092 | 0.731740  | N      | 4.042837  | -1.952220 | -0.698672 | C      | 2.173429  | -0.815585 | -0.564801 |
| H      | -1.255917 | -0.912603 | 1.802650  | C      | 3.279001  | -1.094769 | 0.184947  | H      | 5.083849  | 0.437393  | 0.870126  |
| S      | -2.927269 | -1.912007 | 0.331563  | H      | 3.153363  | -1.504043 | 1.202709  | H      | 3.829955  | 1.303524  | -0.037705 |
| O      | -1.079816 | 2.071990  | 0.339897  | C      | 4.005325  | 0.241587  | 0.334225  | O      | 3.269215  | 0.646522  | 1.873898  |
| H      | -2.766613 | -3.137471 | 0.860272  | C      | 1.860929  | -0.949714 | -0.385372 | H      | 3.388460  | 1.548655  | 2.184454  |
| O      | -2.699782 | 0.890631  | -0.677391 | H      | 5.060449  | 0.030523  | 0.555435  | O      | 1.918128  | -1.335531 | -1.643928 |
| C      | -3.549108 | 2.037395  | -0.607469 | H      | 3.966920  | 0.777763  | 0.624285  | H      | 3.980330  | -1.516150 | -1.836056 |
| H      | -4.489462 | 1.733826  | -1.064563 | O      | 3.402250  | 0.982218  | 1.385249  | H      | 5.203941  | -1.818801 | -0.782331 |
| H      | -3.704955 | 2.334392  | 0.432050  | H      | 3.697201  | 1.895468  | 1.329361  | N      | 1.245554  | -0.217776 | 0.217235  |
| H      | -3.105817 | 2.872873  | -1.154101 | O      | 1.424285  | -1.747313 | -1.211487 | H      | 1.559354  | 0.232188  | 1.074292  |
|        |           |           |           | H      | 3.374398  | -2.462229 | -1.272835 | C      | -0.136964 | -0.099757 | -0.181166 |
| 307    |           |           |           | H      | 4.580050  | -2.626365 | -0.168522 | H      | -0.196162 | -0.355508 | -1.241306 |
| SerPhe |           |           |           | N      | 1.135500  | 0.079040  | 0.094076  | C      | -1.021935 | -1.039271 | 0.651052  |
| N      | 4.283050  | -2.097553 | -0.482911 | H      | 1.568744  | 0.737973  | 0.737091  | C      | -0.558065 | 1.344830  | 0.041092  |
| C      | 3.667568  | -1.001259 | 0.236806  | C      | -0.202124 | 0.324223  | -0.381344 | H      | -0.622951 | -2.053653 | 0.522140  |
| H      | 3.736940  | -1.094645 | 1.335152  | H      | -0.234562 | 0.103062  | -1.455710 | H      | -0.884459 | -0.770831 | 1.706625  |
| C      | 4.372845  | 0.300842  | -0.139492 | C      | -1.231455 | -0.576704 | 0.332561  | C      | -2.469871 | -0.980162 | 0.293767  |
| C      | 2.166904  | -0.991522 | -0.084813 | C      | -0.486899 | 1.799235  | -0.175137 | O      | -0.421728 | 1.917251  | 1.099137  |
| H      | 5.455743  | 0.135371  | -0.057197 | H      | -0.765836 | -1.564169 | 0.403963  | N      | -3.454354 | -1.398666 | 1.159679  |
| H      | 4.150861  | 0.536849  | -1.189581 | H      | -1.403593 | -0.228795 | 1.355886  | C      | -3.154283 | -0.589388 | -0.832113 |
| O      | 3.945951  | 1.329903  | 0.741349  | C      | -2.565833 | -0.708378 | -0.387776 | H      | -3.308833 | -1.746770 | 2.093320  |
| H      | 4.218042  | 2.178379  | 0.380427  | O      | 0.188418  | 2.541628  | 0.500158  | C      | -4.651202 | -1.244483 | 0.531934  |
| O      | 1.607410  | -1.991446 | -0.529986 | H      | -2.988914 | 0.281697  | -0.594181 | N      | -4.506761 | -0.755314 | -0.674199 |
| H      | 3.539703  | -2.742614 | -0.742983 | H      | -2.428727 | -1.199580 | -1.358976 | H      | -2.741426 | -0.185602 | -1.745844 |
| H      | 4.936721  | -2.593829 | 0.109132  | C      | -3.578020 | -1.456204 | 0.464203  | H      | -5.589432 | -1.502451 | 1.004475  |
| N      | 1.513201  | 0.156954  | 0.175520  | O      | -3.604025 | -1.370207 | 1.680255  | O      | -1.074214 | 1.900486  | -1.054730 |
| H      | 2.032280  | 0.966082  | 0.509667  | N      | -4.486341 | -2.192614 | -0.230409 | C      | -1.537390 | 3.242765  | -0.893684 |
| C      | 0.105493  | 0.276753  | -0.096597 | H      | -5.171258 | -2.711869 | 0.293971  | H      | -1.913886 | 3.544148  | -1.870057 |
| H      | -0.119180 | -0.222141 | -1.046096 | H      | -4.412317 | -2.342906 | -1.220898 | H      | -2.333906 | 3.281450  | -0.147145 |
| C      | -0.751373 | -0.399148 | 1.007681  | O      | -1.594013 | 2.188274  | -0.819517 | H      | -0.719973 | 3.894463  | -0.576801 |
| C      | -0.212497 | 1.751855  | -0.226090 | C      | -1.952066 | 3.558728  | -0.628171 |        |           |           |           |
| H      | -0.222622 | -1.325921 | 1.250986  | H      | -2.864691 | 3.708457  | -1.203643 | 312    |           |           |           |
| H      | -0.742840 | 0.227926  | 1.906147  | H      | -2.126107 | 3.765741  | 0.430160  | SerLeu |           |           |           |
| C      | -2.157443 | -0.730677 | 0.588282  | H      | -1.157564 | 4.214998  | -0.990568 | N      | 4.080237  | -1.296915 | -0.814991 |
| O      | 0.520626  | 2.644620  | 0.138276  |        |           |           |           | C      | 3.209213  | -0.616764 | 0.121986  |
| C      | -3.259776 | -0.043964 | 1.098078  | 310    |           |           |           | H      | 3.248028  | -1.029922 | 1.145505  |
| C      | -2.374263 | -1.760645 | -0.332916 | SerIle |           |           |           | C      | 3.632324  | 0.848041  | 0.222103  |
| H      | -3.104052 | 0.755720  | 1.818588  | N      | 4.070241  | -1.143166 | -0.793794 | C      | 1.757369  | -0.800037 | -0.346048 |
| C      | -4.551758 | -0.375159 | 0.698471  | C      | 3.131621  | -0.493067 | 0.098048  | H      | 4.720837  | 0.877294  | 0.367345  |
| C      | -3.662855 | -2.090602 | -0.737579 | H      | 3.150288  | -0.889621 | 1.128486  | H      | 3.409894  | 1.350260  | -0.729665 |
| H      | -1.518399 | -2.307051 | -0.724399 | C      | 3.480213  | 0.991839  | 0.191306  | O      | 2.956772  | 1.453636  | 1.315583  |
| H      | -5.399782 | 0.165907  | 1.109141  | C      | 1.709029  | -0.749820 | -0.422360 | H      | 3.043092  | 2.408179  | 1.240649  |
| C      | -4.756605 | -1.398130 | -0.222427 | H      | 4.559749  | 1.075184  | 0.376739  | O      | 1.452288  | -1.702297 | -1.120929 |
| H      | -3.815083 | -2.895053 | -1.451708 | H      | 3.270921  | 1.469291  | -0.776074 | H      | 3.503902  | -1.956354 | -1.334369 |
| H      | -5.764013 | -1.658482 | -0.534308 | O      | 2.735027  | 1.579026  | 1.248670  | H      | 4.793887  | -1.821798 | -0.325748 |
| O      | -1.414786 | 1.946182  | -0.767209 | H      | 2.768895  | 2.535361  | 1.156584  | N      | 0.863094  | 0.067857  | 0.165947  |
| C      | -1.823925 | 3.309852  | -0.869575 | O      | 1.478689  | -1.664494 | -1.208458 | H      | 1.189624  | 0.810373  | 0.779881  |
| H      | -2.827887 | 3.284462  | -1.290878 | H      | 3.545522  | -1.829021 | -1.333267 | C      | -0.533449 | 0.007743  | -0.190297 |
| H      | -1.831035 | 3.784951  | 0.114311  | H      | 4.782650  | -1.634594 | -0.269429 | H      | -0.607970 | -0.350457 | -1.221622 |

|        |           |           |           |        |           |           |           |        |           |           |           |
|--------|-----------|-----------|-----------|--------|-----------|-----------|-----------|--------|-----------|-----------|-----------|
| C      | -1.294143 | -0.963141 | 0.737085  | C      | -1.118127 | -0.550472 | 0.429003  | H      | 4.526736  | -1.144512 | -1.738091 |
| C      | -1.080882 | 1.417890  | -0.107047 | C      | -0.342329 | 1.810437  | -0.118924 | H      | 4.283415  | -1.516317 | -0.000940 |
| H      | -0.749371 | -1.913415 | 0.672029  | H      | -0.719035 | -1.568807 | 0.383853  | H      | 3.340969  | -2.390578 | -1.228515 |
| H      | -1.180728 | -0.600965 | 1.767049  | H      | -1.138720 | -0.253049 | 1.484077  |        |           |           |           |
| C      | -2.774061 | -1.217843 | 0.435107  | C      | -2.521679 | -0.539733 | -0.160104 | 317    |           |           |           |
| O      | -0.596057 | 2.303223  | 0.560952  | O      | 0.328790  | 2.524404  | 0.590692  | SerTyr |           |           |           |
| H      | -3.319635 | -0.269326 | 0.529664  | H      | -2.961715 | 0.460841  | -0.121923 | N      | 4.642015  | -2.145317 | -0.536687 |
| C      | -2.993484 | -1.748609 | -0.800183 | H      | -2.488544 | -0.854957 | -1.209845 | C      | 4.016597  | -1.077059 | 0.216009  |
| C      | -3.338063 | -2.189675 | 1.470355  | S      | -3.575000 | -1.690209 | 0.774190  | H      | 4.062848  | -1.216790 | 1.310807  |
| H      | -2.394860 | -2.650140 | -1.156268 | C      | -5.123681 | -1.468114 | -0.130233 | C      | 4.734451  | 0.236172  | -0.089971 |
| H      | -4.045216 | -2.010381 | -1.136663 | H      | -5.017563 | -1.759871 | -1.178872 | C      | 2.522331  | -1.049246 | -0.134954 |
| H      | -2.724067 | -1.009145 | -1.739411 | H      | -5.866524 | -2.117374 | 0.338176  | H      | 5.814965  | 0.062135  | 0.005464  |
| H      | -3.204438 | -1.814176 | 2.490544  | H      | -5.476461 | -0.434543 | -0.070544 | H      | 4.533208  | 0.519285  | -1.132564 |
| H      | -4.408228 | -2.357090 | 1.311100  | O      | -1.407051 | 2.238247  | -0.806532 | O      | 4.295135  | 1.227714  | 0.827328  |
| H      | -2.836388 | -3.162446 | 1.404877  | C      | -1.723589 | 3.620652  | -0.629226 | H      | 4.586982  | 2.088691  | 0.514687  |
| O      | -2.185487 | 1.567828  | -0.847077 | H      | -2.609296 | 3.801034  | -1.237014 | O      | 1.967263  | -2.032326 | -0.619826 |
| C      | -2.788779 | 2.860624  | -0.777479 | H      | -1.926678 | 3.837057  | 0.422136  | H      | 3.901578  | -2.779562 | -0.829809 |
| H      | -3.670524 | 2.810007  | -1.414980 | H      | -0.894365 | 4.247937  | -0.964246 | H      | 5.287528  | -2.663993 | 0.045137  |
| H      | -3.070454 | 3.099376  | 0.250795  |        |           |           |           | N      | 1.870895  | 0.096301  | 0.144569  |
| H      | -2.097091 | 3.625042  | -1.139132 | 315    |           |           |           | H      | 2.384108  | 0.882564  | 0.536728  |
|        |           |           |           | SerPro |           |           |           | C      | 0.463892  | 0.232374  | -0.128860 |
| 313    |           |           |           | N      | 2.312816  | -2.036254 | -0.944629 | H      | 0.233413  | -0.262247 | -1.078063 |
| SerLys |           |           |           | C      | 1.626160  | -1.147188 | -0.023335 | C      | -0.391302 | -0.433388 | 0.981480  |
| N      | 4.159926  | -2.146271 | -0.783903 | H      | 0.670244  | -1.600885 | 0.246249  | C      | 0.161609  | 1.711248  | -0.246310 |
| C      | 3.414020  | -1.339632 | 0.160550  | C      | 2.465164  | -0.102303 | 1.243056  | H      | 0.059149  | -1.419626 | 1.133349  |
| H      | 3.225585  | -1.844102 | 1.124768  | C      | 1.446365  | 0.249673  | -0.633837 | H      | -0.258865 | 0.133486  | 1.909874  |
| C      | 4.210994  | -0.074493 | 0.474200  | H      | 2.644297  | -2.035295 | 1.630033  | C      | -1.848651 | -0.586935 | 0.647128  |
| C      | 2.027880  | -1.052442 | -0.436436 | H      | 3.435103  | -0.578800 | 0.973935  | O      | 0.842260  | 2.586510  | 0.242117  |
| H      | 5.243283  | -0.372342 | 0.703366  | O      | 1.759482  | -0.213974 | 2.167192  | C      | -2.828829 | 0.199990  | 1.249183  |
| H      | 4.239048  | 0.561743  | -0.421386 | H      | 2.330866  | -0.049551 | 2.921820  | C      | -2.258670 | -1.539974 | -0.292821 |
| O      | 3.614810  | 0.587659  | 1.580793  | O      | 2.364834  | 0.724366  | -1.296192 | H      | -2.540672 | 0.942806  | 1.989630  |
| H      | 3.970806  | 1.479002  | 1.635106  | H      | 3.010286  | -1.468739 | -1.424760 | C      | -4.174990 | 0.050247  | 0.928819  |
| O      | 1.572598  | -1.747191 | -1.340458 | H      | 1.653586  | -2.322335 | -1.662543 | C      | -3.594878 | -1.699065 | -0.627038 |
| H      | 3.484029  | -2.559418 | -1.423644 | N      | 0.297368  | 0.936253  | -0.416281 | H      | -1.511205 | -2.173669 | -0.765537 |
| H      | 4.643530  | -2.898423 | -0.310028 | C      | 0.172092  | 2.321774  | -0.850096 | H      | -4.924332 | 0.671042  | 1.416613  |
| N      | 1.355751  | -0.021187 | 0.111566  | C      | -0.820990 | 0.520006  | 0.410578  | C      | -4.562457 | -0.899960 | -0.014732 |
| H      | 1.802570  | 0.531514  | 0.839475  | H      | -0.318005 | 2.377449  | -1.831979 | H      | -3.911287 | -2.440788 | -1.353202 |
| C      | 0.042376  | 0.351429  | -0.353127 | H      | 1.168558  | 2.755976  | -0.945383 | O      | -5.857927 | -1.096668 | -0.373339 |
| H      | -0.012977 | 0.164099  | -1.431150 | C      | -0.694722 | 2.934257  | 0.242046  | H      | -6.415067 | -0.492616 | 0.127617  |
| C      | -1.053052 | -0.481496 | 0.342976  | C      | -1.669610 | 1.804696  | 0.571675  | O      | -0.962878 | 1.931341  | -0.927136 |
| C      | -0.119631 | 1.835972  | -0.095206 | H      | -0.463861 | 0.169618  | 1.386517  | C      | -1.363548 | 3.298288  | -1.013798 |
| H      | -0.752840 | -1.526563 | 0.207038  | C      | -1.629937 | -0.600232 | -0.223912 | H      | -1.511236 | 3.720117  | -0.016745 |
| H      | -1.014043 | -0.275320 | 1.420550  | H      | -1.201159 | 3.849622  | -0.075334 | H      | -0.606235 | 3.887757  | -1.536259 |
| C      | -2.469013 | -0.290752 | -0.188566 | H      | -0.074944 | 3.169404  | 1.114013  | H      | -2.299391 | 3.295812  | -1.570867 |
| O      | 0.502209  | 2.457695  | 0.736835  | H      | -2.494058 | 1.799441  | -0.149658 |        |           |           |           |
| H      | -2.798781 | 0.743568  | -0.033142 | H      | -2.109371 | 1.871871  | 1.568406  | 318    |           |           |           |
| H      | -2.470954 | -0.447839 | -1.275857 | O      | -1.367515 | -1.175341 | -1.252509 | SerThr |           |           |           |
| C      | -3.460707 | -1.247854 | 0.464149  | O      | -2.696317 | -0.883462 | 0.539298  | N      | -3.940017 | 0.173386  | -0.768927 |
| H      | -3.163320 | -2.288183 | 0.285810  | C      | -3.526039 | -1.936265 | 0.048459  | C      | -2.779246 | 0.248063  | 0.094128  |
| H      | -3.440759 | -1.105022 | 1.554947  | H      | -2.957237 | -2.865262 | -0.037804 | H      | -2.888071 | 1.087850  | 0.791468  |
| C      | -4.886654 | -1.062927 | -0.034812 | H      | -4.329044 | -2.045786 | 0.776538  | C      | -2.707135 | -1.037571 | 0.947064  |
| H      | -5.184782 | -0.008261 | 0.116197  | H      | -3.931329 | -1.681559 | -0.933802 | C      | -1.474938 | 0.408902  | -0.683018 |
| H      | -4.909858 | -1.235244 | -1.118515 |        |           |           |           | H      | -3.649895 | -1.106059 | 1.497569  |
| N      | -5.777217 | -2.031247 | 0.590099  | 316    |           |           |           | H      | -2.659676 | -1.903211 | 0.270020  |
| H      | -5.847150 | -1.837563 | 1.584694  | SerSer |           |           |           | O      | -1.648187 | -1.036835 | 1.873560  |
| H      | -6.715464 | -1.934410 | 0.216388  | N      | -3.881909 | 0.561992  | -0.841938 | H      | -0.863534 | -1.403505 | 1.435012  |
| O      | -1.050609 | 2.381328  | -0.885455 | C      | -2.876893 | 0.085178  | 0.085862  | O      | -1.401620 | 0.184256  | -1.883673 |
| C      | -1.290704 | 3.771641  | -0.663802 | H      | -3.071127 | 0.366496  | 1.136294  | H      | -3.651367 | -0.320646 | -1.611753 |
| H      | -2.072243 | 4.052702  | -1.368599 | C      | -2.839644 | -1.441480 | 0.039701  | H      | -4.181105 | 1.106750  | -1.086397 |
| H      | -1.617438 | 3.947782  | 0.363848  | C      | -1.535191 | 0.739434  | -0.277213 | N      | -0.395741 | 0.777278  | 0.069292  |
| H      | -0.382579 | 4.350602  | -0.847480 | H      | -3.872385 | -1.807825 | 0.115911  | H      | -0.501278 | 0.689482  | 1.074464  |
|        |           |           |           | H      | -2.443427 | -1.760590 | -0.934333 | C      | 0.927060  | 0.571735  | -0.447327 |
| 314    |           |           |           | O      | -2.049289 | -1.918204 | 1.119865  | H      | 0.887378  | 0.717945  | -1.531937 |
| SerMet |           |           |           | H      | -1.860665 | -2.850028 | 0.976946  | C      | 1.925956  | 1.553006  | 0.169884  |
| N      | 4.116580  | -1.988284 | -0.782217 | O      | -1.493625 | 1.765952  | -0.946876 | C      | 1.369529  | -0.870607 | -0.206774 |
| C      | 3.375905  | -1.151494 | 0.139634  | H      | -3.520355 | 1.414743  | -1.264494 | H      | 2.916492  | 1.316955  | -0.246228 |
| H      | 3.259224  | -1.592225 | 1.145415  | H      | -4.739700 | 0.791057  | -0.356267 | C      | 1.573844  | 2.998943  | -0.131599 |
| C      | 4.120862  | 0.170328  | 0.321226  | N      | -0.435278 | 0.126744  | 0.209312  | O      | 1.893293  | 1.275014  | 1.560278  |
| C      | 1.951370  | -0.973083 | -0.404453 | H      | -0.544029 | -0.730616 | 0.746640  | O      | 0.723911  | -1.714192 | 0.377689  |
| H      | 5.175646  | -0.060611 | 0.523031  | C      | 0.890204  | 0.624581  | -0.056972 | H      | 0.570881  | 3.230571  | 0.234789  |
| H      | 4.078001  | 0.736571  | -0.619601 | H      | 0.899782  | 1.139623  | -1.020697 | H      | 2.289859  | 3.674324  | 0.349932  |
| O      | 3.540133  | 0.885871  | 1.402304  | C      | 1.309689  | 1.614695  | 1.035187  | H      | 1.607094  | 3.194893  | -1.207558 |
| H      | 3.854361  | 1.794036  | 1.376026  | C      | 1.840123  | -0.557334 | -0.082732 | H      | 2.445146  | 1.919880  | 2.013105  |
| O      | 1.491092  | -1.742695 | -1.242682 | H      | 0.593117  | 2.447686  | 1.004168  | O      | 2.565145  | -1.107262 | -0.743632 |
| H      | 3.434825  | -2.476660 | -1.359426 | H      | 1.212589  | 1.108683  | 2.008606  | C      | 3.062567  | -2.436543 | -0.569344 |
| H      | 4.658522  | -2.681304 | -0.282112 | O      | 2.630255  | 2.027206  | 0.779568  | H      | 4.033465  | -2.455294 | -1.062544 |
| N      | 1.247390  | 0.053183  | 0.114521  | O      | 1.714971  | -1.529098 | 0.629967  | H      | 3.164699  | -2.668471 | 0.493073  |
| H      | 1.700450  | 0.686358  | 0.769856  | H      | 2.869239  | 2.686707  | 1.436651  | H      | 2.384057  | -3.159521 | -1.027414 |
| C      | -0.096173 | 0.328233  | -0.324916 | O      | 2.823543  | -0.392712 | -0.963661 |        |           |           |           |
| H      | -0.168972 | 0.097481  | -1.394439 | C      | 3.801594  | -1.431879 | -0.977899 | 319    |           |           |           |

|        |           |           |           |        |           |           |           |          |           |           |           |
|--------|-----------|-----------|-----------|--------|-----------|-----------|-----------|----------|-----------|-----------|-----------|
| SerTrp |           |           | TyrAsp    |        | H         | 4.297936  | -0.107646 | 1.374073 |           |           |           |
| N      | 4.176739  | -2.717617 | -0.242889 | N      | -1.953466 | -2.539948 | -0.576660 | 5.346503 | -0.811775 | -0.321340 |           |
| C      | 3.860625  | -1.425481 | 0.330772  | C      | -1.431730 | -1.201856 | -0.376194 | O        | 6.431799  | -0.446316 | -0.706311 |
| H      | 3.995898  | -1.379258 | 1.426123  | H      | -1.621907 | -0.604098 | -1.276678 | O        | 2.896961  | 2.783734  | 0.626068  |
| C      | 4.788807  | -0.372285 | -0.272063 | C      | -2.147924 | -0.518872 | 0.811226  | C        | 3.066910  | 4.161005  | 0.276856  |
| C      | 2.372709  | -1.136545 | 0.085829  | C      | 0.075330  | -1.224592 | -0.094656 | H        | 3.929732  | 4.503964  | 0.845778  |
| H      | 5.816521  | -0.756999 | -0.219949 | H      | -2.104301 | -1.214775 | 1.658649  | H        | 3.246033  | 4.265292  | -0.795509 |
| H      | 4.536489  | -0.238726 | -1.333192 | H      | -1.580467 | 0.370758  | 1.109629  | H        | 2.176200  | 4.733367  | 0.545054  |
| O      | 4.659185  | 0.835674  | 0.464006  | C      | -3.569181 | -0.119965 | 0.515399  | O        | 4.938342  | -2.091289 | -0.372362 |
| H      | 5.067724  | 1.547548  | -0.036528 | C      | -3.914744 | 1.225499  | 0.387769  | C        | 5.889543  | -3.003888 | -0.915998 |
| O      | 1.586688  | -2.049688 | -0.159713 | C      | -4.581051 | -1.074047 | 0.346299  | H        | 5.407056  | -3.980711 | -0.900261 |
| H      | 3.298317  | -3.218990 | -0.358140 | H      | -3.152251 | 1.990518  | 0.518827  | H        | 6.154365  | -2.722559 | -1.938209 |
| H      | 4.764359  | -3.253788 | 0.382752  | C      | -5.219393 | 1.618425  | 0.102133  | H        | 6.799967  | -3.017118 | -0.311538 |
| N      | 1.998461  | 0.152518  | 0.183685  | C      | -5.885041 | -0.697884 | 0.060174  |          |           |           |           |
| H      | 2.701631  | 0.863299  | 0.373116  | H      | -4.324851 | -2.125698 | 0.419655  | 323      |           |           |           |
| C      | 0.628119  | 0.548115  | -0.015511 | H      | -5.463694 | 2.675279  | 0.011740  | TyrAla   |           |           |           |
| H      | 0.196143  | -0.047761 | -0.825799 | C      | -6.211545 | 0.653883  | -0.062678 | N        | -1.119903 | 2.649824  | 0.386687  |
| C      | -0.222129 | 0.313201  | 1.263782  | H      | -6.668298 | -1.437858 | -0.070047 | C        | -0.459442 | 1.363118  | 0.269575  |
| C      | 0.629074  | 2.007670  | -0.414498 | O      | -7.504884 | 0.966767  | -0.339559 | H        | -0.571057 | 0.815729  | 1.214052  |
| H      | 0.083776  | -0.672327 | 1.632276  | H      | -7.588279 | 1.924143  | -0.391583 | C        | -1.114863 | 0.525605  | -0.851421 |
| H      | 0.070865  | 1.046196  | 2.024046  | O      | 0.622739  | -2.211148 | 0.384844  | C        | 1.031421  | 1.528555  | -0.049487 |
| C      | -1.695159 | 0.324695  | 1.039324  | H      | -1.443282 | -3.149424 | 0.061744  | H        | -1.158298 | 1.160762  | -1.745387 |
| O      | 1.542364  | 2.773885  | -0.195565 | H      | -1.711944 | -2.862696 | -1.508325 | H        | -0.458675 | -0.316949 | -1.100636 |
| C      | -2.605071 | 1.253727  | 1.465700  | N      | 0.752841  | -0.086349 | -0.377020 | C        | -2.480213 | -0.003243 | -0.499934 |
| C      | -2.082780 | -1.854752 | -0.343917 | H      | 0.281361  | 0.740604  | -0.719486 | C        | -2.677741 | -1.368843 | -0.294252 |
| C      | -2.441135 | -0.668007 | 0.313489  | C      | 2.138533  | 0.082948  | -0.021961 | C        | -3.585491 | 0.845912  | -0.357446 |
| H      | -2.448123 | 2.152637  | 2.046503  | H      | 2.308775  | -0.268575 | 1.002973  | H        | -1.839827 | -2.054397 | -0.402407 |
| N      | -3.867619 | 0.903015  | 1.046422  | C      | 3.067428  | -0.724571 | -0.949500 | C        | -3.927717 | -1.881774 | 0.041264  |
| C      | -3.800739 | -0.272934 | 0.339951  | C      | 2.433710  | 1.570354  | -0.088002 | C        | -4.836609 | 0.349697  | -0.021999 |
| C      | -3.078768 | -2.602294 | -0.951174 | H      | 2.698688  | -1.755531 | -0.915927 | H        | -3.444039 | 1.913237  | -0.491029 |
| H      | -1.043862 | -2.176715 | -0.370947 | H      | 3.007487  | -0.359832 | -1.976986 | H        | -4.056012 | -2.952129 | 0.192311  |
| H      | -4.710192 | 1.406594  | 1.259733  | C      | 4.517916  | -0.732275 | -0.537231 | C        | -5.014387 | -1.020387 | 0.178337  |
| C      | -4.805320 | -1.025168 | -0.270701 | O      | 1.640075  | 2.404216  | -0.463862 | H        | -5.692145 | 1.008542  | -0.087714 |
| C      | -4.423578 | -2.191557 | -0.915457 | O      | 5.449705  | -0.498854 | -1.268348 | O        | -6.261965 | -1.453634 | 0.500744  |
| H      | -2.819863 | -3.523722 | -1.464379 | O      | 3.678186  | 1.839638  | 0.298957  | H        | -6.240633 | -2.410261 | 0.603790  |
| H      | -5.845510 | -0.712407 | -0.242584 | C      | 4.065073  | 3.213448  | 0.206437  | O        | 1.450064  | 2.518141  | -0.640027 |
| H      | -5.179845 | -2.801215 | -1.401474 | H      | 5.103922  | 3.248134  | 0.530424  | H        | -0.687665 | 3.258642  | -0.307772 |
| O      | -0.510714 | 2.358418  | -1.010330 | H      | 3.971930  | 3.566593  | -0.822678 | H        | -0.894637 | 3.064832  | 1.285445  |
| C      | -0.611155 | 3.737744  | -1.360727 | H      | 3.437259  | 3.829527  | 0.853957  | N        | 1.839618  | 0.510886  | 0.327898  |
| H      | -0.517121 | 4.369444  | -0.473971 | O      | 4.651044  | -1.075551 | 0.753996  | H        | 1.467381  | -0.332814 | 0.743211  |
| H      | 0.173225  | 4.011854  | -2.070425 | C      | 5.993414  | -1.108332 | 1.231005  | C        | 3.233828  | 0.473771  | -0.041945 |
| H      | -1.594690 | 3.855833  | -1.813666 | H      | 6.455291  | -0.121507 | 1.143754  | H        | 3.333516  | 0.788469  | -0.188898 |
|        |           |           |           | H      | 5.930719  | -1.409676 | 2.276184  | C        | 4.097219  | 1.399930  | 0.818809  |
|        |           |           |           | H      | 6.588538  | -1.825330 | 0.660389  | C        | 3.688496  | -0.967942 | 0.065581  |
| 320    |           |           |           | 322    |           |           |           | H        | 4.036283  | 1.113614  | 1.872876  |
| SerVal |           |           |           | TyrGlu |           |           |           | H        | 5.140712  | 1.360825  | 0.498103  |
| N      | 4.016704  | -0.655243 | -0.779125 | N      | -1.890613 | -2.509537 | 0.375826  | H        | 3.725696  | 2.419996  | 0.705213  |
| C      | 2.984288  | -0.129894 | 0.091217  | C      | -1.550994 | -1.113400 | 0.176487  | O        | 3.010813  | -1.867785 | 0.511038  |
| H      | 3.093330  | -0.439223 | 1.145456  | H      | -1.678949 | -0.861211 | -0.883905 | O        | 4.936691  | -1.121201 | -0.377528 |
| C      | 3.045916  | 1.397096  | 0.072026  | C      | -2.495125 | -0.209498 | 1.000959  | C        | 5.452976  | -2.450773 | -0.290588 |
| C      | 1.628500  | -0.685532 | -0.371641 | C      | -0.103495 | -0.825658 | 0.593198  | H        | 6.466523  | -2.399978 | -0.685931 |
| H      | 4.092489  | 1.695384  | 0.221416  | H      | -2.498355 | -0.596787 | 2.027741  | H        | 5.461586  | -2.791689 | 0.747281  |
| H      | 2.736531  | 1.754786  | -0.919955 | H      | -2.071558 | 0.800702  | 1.051001  | H        | 4.843602  | -3.137345 | -0.882792 |
| O      | 2.217711  | 1.909179  | 1.106421  | C      | -3.894732 | -0.128813 | 0.451637  |          |           |           |           |
| H      | 2.064796  | 2.844579  | 0.945761  | C      | -4.361942 | 1.053924  | -0.121820 | 324      |           |           |           |
| O      | 1.564117  | -1.675006 | -1.095799 | C      | -4.763384 | -1.227753 | 0.483772  | TyrArg   |           |           |           |
| H      | 3.619056  | -1.457220 | -1.264463 | H      | -3.712623 | 1.926200  | -0.157332 | N        | 2.670594  | -2.614399 | -0.054736 |
| H      | 4.810947  | -0.976966 | -0.240944 | C      | -5.647325 | 1.150472  | -0.647608 | C        | 2.194413  | -1.244246 | -0.016676 |
| N      | 0.540556  | -0.034548 | 0.086085  | C      | -6.046149 | -1.147109 | -0.037602 | H        | 2.285089  | -0.861195 | 1.007713  |
| H      | 0.667774  | 0.819487  | 0.624510  | H      | -4.408055 | -2.162215 | 0.905316  | C        | 3.055621  | -0.351875 | -0.938624 |
| C      | -0.788590 | -0.428041 | -0.310910 | H      | -5.989012 | 2.086342  | -1.086075 | C        | 0.729336  | -1.150969 | -0.463630 |
| H      | -0.754076 | -0.779937 | -1.348725 | C      | -6.495946 | 0.046004  | -0.606034 | H        | 3.100551  | -0.846503 | -1.917286 |
| C      | -1.325973 | -1.595692 | 0.560590  | H      | -6.718384 | -1.998856 | -0.011773 | H        | 2.540919  | 0.603288  | -1.096378 |
| C      | -1.657943 | 0.811792  | -0.241458 | O      | -7.763093 | 0.071372  | -1.097239 | C        | 4.439057  | -0.084600 | -0.407907 |
| H      | -0.509451 | -2.327524 | 0.525283  | H      | -7.941315 | 0.948709  | -1.450409 | C        | 4.790470  | 1.187836  | 0.043065  |
| C      | -1.539726 | -1.172010 | 2.009810  | O      | 0.471041  | -1.515439 | 1.427816  | C        | 5.407922  | -1.094089 | -0.336740 |
| C      | -2.566699 | -2.256539 | -0.030239 | H      | -1.411110 | -2.804772 | 1.225794  | H        | 4.061179  | 1.993895  | -0.003327 |
| O      | -1.366833 | 1.820418  | 0.362103  | H      | -1.484226 | -3.066752 | -0.369208 | C        | 6.059662  | 1.456906  | 0.548085  |
| H      | -2.376314 | -0.469351 | 2.103857  | N      | 0.481815  | 0.248595  | 0.012815  | C        | 6.676168  | -0.841492 | 0.164979  |
| H      | -1.770221 | -2.041398 | 2.633148  | H      | -0.014995 | 0.835050  | -0.644094 | H        | 5.142577  | -2.094889 | -0.660730 |
| H      | -0.647634 | -0.690333 | 2.421050  | C      | 1.795208  | 0.700534  | 0.403390  | H        | 6.309849  | 2.459631  | 0.889959  |
| H      | -2.399241 | -2.564407 | -1.067417 | H      | 1.895287  | 0.607862  | 1.491865  | C        | 7.009346  | 0.439096  | 0.609744  |
| H      | -2.823766 | -3.150839 | 0.546350  | C      | 2.895413  | -0.152138 | -0.259917 | H        | 7.426057  | -1.624322 | 0.218949  |
| H      | -3.430861 | -1.586467 | -0.015115 | C      | 1.884289  | 2.165085  | 0.017979  | O        | 8.267373  | 0.633049  | 1.087587  |
| O      | -2.801524 | 0.659979  | -0.917845 | H      | 2.613862  | -1.193236 | -0.084582 | H        | 8.359041  | 1.553535  | 1.353099  |
| C      | -3.686689 | 1.779587  | -0.865751 | H      | 2.869940  | 0.017649  | -1.343143 | O        | 0.232728  | -1.998356 | -1.198216 |
| H      | -4.560748 | 1.492201  | -1.448833 | C      | 4.298915  | 0.084010  | 0.292729  | H        | 2.217583  | -3.051952 | -0.856815 |
| H      | -3.968403 | 2.001076  | 0.166385  | O      | 1.131976  | 2.705043  | -0.762775 | H        | 2.320824  | -3.115644 | 0.755888  |
| H      | -3.211304 | 2.663529  | -1.297378 | H      | 4.637455  | 1.110452  | 0.147229  | N        | 0.042897  | -0.068749 | -0.032034 |
|        |           |           |           |        |           |           |           | H        | 0.470660  | 0.632021  | 0.558055  |
| 321    |           |           |           |        |           |           |           |          |           |           |           |

|        |           |           |           |        |           |           |           |        |           |           |           |
|--------|-----------|-----------|-----------|--------|-----------|-----------|-----------|--------|-----------|-----------|-----------|
| C      | -1.310126 | 0.202054  | -0.459352 | C      | 3.028788  | 0.388216  | -0.062506 | H      | -2.686593 | 4.072135  | -1.146003 |
| H      | -1.406491 | -0.061325 | -1.518828 | C      | 3.899483  | 0.131124  | -1.124171 |        |           |           |           |
| C      | -2.330215 | -0.626849 | 0.346075  | C      | 3.589054  | 0.676282  | 1.186275  | 328    |           |           |           |
| C      | -1.527589 | 1.692754  | -0.289093 | H      | 3.486535  | -0.107537 | -2.099996 | TyrGly |           |           |           |
| H      | -1.970850 | -1.660773 | 0.287361  | C      | 5.278893  | 0.161194  | -0.948558 | N      | 0.998912  | 2.335547  | 0.165665  |
| H      | -2.270823 | -0.323069 | 1.399188  | C      | 4.963479  | 0.710320  | 1.377992  | C      | 0.301929  | 1.200093  | -0.404334 |
| C      | -3.769285 | -0.552468 | -0.148108 | H      | 2.934417  | 0.886452  | 2.029489  | H      | 0.496207  | 1.065452  | -1.486745 |
| O      | -0.858432 | 2.392175  | 0.440264  | H      | 5.938733  | -0.038028 | -1.710162 | C      | 0.727309  | -0.100336 | 0.299360  |
| H      | -4.169614 | 0.459622  | -0.046094 | C      | 5.817227  | 0.452379  | 0.305170  | C      | -1.196196 | 1.510669  | -0.321166 |
| H      | -3.804909 | -0.812119 | -1.215435 | H      | 5.393805  | 0.940637  | 2.347166  | H      | 0.423743  | -0.034960 | 1.349951  |
| C      | -4.674674 | -1.498542 | 0.637858  | O      | 7.154020  | 0.501580  | 0.539314  | H      | 0.208908  | -0.957050 | -0.149716 |
| H      | -4.322495 | -2.532936 | 0.542633  | H      | 7.621280  | 0.312279  | -0.280581 | C      | 2.210694  | -0.347396 | 0.203685  |
| H      | -4.645139 | -1.233378 | 1.698728  | O      | -1.024196 | -2.301014 | -0.627388 | C      | 3.098305  | 0.229029  | 1.115484  |
| N      | -6.066114 | -1.465531 | 0.235208  | H      | 1.020083  | -2.823779 | -1.115808 | C      | 2.747155  | -1.136247 | -0.819018 |
| H      | -6.249047 | -1.798615 | -0.700989 | H      | 2.521174  | -2.282746 | -0.696340 | H      | 2.705355  | 0.856648  | 1.909986  |
| C      | -6.852451 | -0.393167 | 0.607075  | N      | -1.294972 | -0.154259 | 0.004279  | C      | 4.470441  | 0.026327  | 1.012508  |
| N      | -6.400108 | 0.516567  | 1.388343  | H      | -0.896799 | 0.756504  | 0.186733  | C      | 4.114175  | -1.348694 | -0.935435 |
| N      | -8.116472 | -0.450358 | 0.018539  | C      | -2.725437 | -0.187377 | -0.172195 | H      | 2.078919  | -1.602732 | -1.539886 |
| H      | -7.142300 | 1.156680  | 1.661426  | H      | -2.976914 | -0.686562 | -1.116011 | H      | 5.143167  | 0.482371  | 1.736719  |
| H      | -8.509796 | -1.380875 | -0.022280 | C      | -3.385519 | -0.975859 | 0.971950  | C      | 4.984703  | -0.765598 | -0.014492 |
| H      | -8.772075 | 0.218036  | 0.394113  | C      | -3.191081 | 1.256893  | -0.226329 | H      | 4.524912  | -1.966909 | -1.727072 |
| O      | -2.549962 | 2.138818  | -1.017805 | H      | -2.891192 | -1.948231 | 0.984076  | O      | 6.313263  | -1.005272 | -0.164893 |
| C      | -2.860947 | 3.523392  | -0.844138 | H      | -3.201513 | -0.466420 | 1.922329  | H      | 6.792375  | -0.552990 | 0.536710  |
| H      | -3.709006 | 3.718236  | -1.498917 | S      | -5.178016 | -1.244072 | 0.720717  | O      | -1.603195 | 2.665560  | -0.367586 |
| H      | -3.124520 | 3.727702  | 0.195950  | O      | -2.485510 | 2.205160  | 0.038952  | H      | 0.462411  | 3.169756  | -0.056997 |
| H      | -2.006744 | 4.144311  | -1.123528 | H      | -5.208228 | -2.447224 | 1.318761  | H      | 1.921453  | 2.420961  | -0.242866 |
|        |           |           |           | O      | -4.468454 | 1.346418  | -0.580816 | N      | -2.048767 | 0.463796  | -0.258351 |
| 325    |           |           |           | C      | -5.014059 | 2.668160  | -0.593848 | H      | -1.738754 | -0.488026 | -0.127297 |
| TyrAsn |           |           |           | H      | -6.058288 | 2.550122  | -0.877891 | C      | -3.465408 | 0.680973  | -0.201221 |
| N      | 1.745574  | -2.055573 | -0.836574 | H      | -4.932808 | 3.124089  | 0.395279  | C      | -4.150572 | -0.639190 | 0.044036  |
| C      | 1.153131  | -1.056686 | 0.030771  | H      | -4.483630 | 3.289929  | -1.318435 | H      | -3.731402 | 1.386883  | 0.595491  |
| H      | 1.309356  | -1.264472 | 1.108165  |        |           |           |           | H      | -3.850371 | 1.119529  | -1.130724 |
| C      | 1.753476  | 0.329548  | -0.255970 | 327    |           |           |           | O      | -3.572521 | -0.951221 | 0.171344  |
| C      | -0.365651 | -1.155678 | -0.156905 | TyrPhe |           |           |           | O      | -5.474046 | -0.492159 | 0.101083  |
| H      | 1.494043  | 0.610914  | -1.282773 | N      | 2.220148  | -2.496059 | 0.595939  | C      | -6.208465 | -1.695667 | 0.334724  |
| H      | 1.313549  | 1.072185  | 0.421510  | C      | 1.772961  | -1.131389 | 0.392943  | H      | -5.917275 | -2.142987 | 1.287874  |
| C      | 3.249390  | 0.357199  | -0.077422 | H      | 1.995616  | -0.542871 | 1.292044  | H      | -7.256985 | -1.401883 | 0.353922  |
| C      | 4.105999  | -0.021316 | -1.114030 | C      | 2.525722  | -0.492060 | -0.796116 | H      | -6.026106 | -2.417314 | -0.464912 |
| C      | 3.825312  | 0.733502  | 1.140286  | C      | 0.267221  | -1.072204 | 0.110665  |        |           |           |           |
| H      | 3.680285  | -0.329877 | -2.064418 | H      | 2.439848  | -1.184812 | -1.642893 | 329    |           |           |           |
| C      | 5.486432  | -0.023770 | -0.944110 | H      | 2.009878  | 0.428668  | -1.093720 | TyrGln |           |           |           |
| C      | 5.201131  | 0.736599  | 1.325977  | C      | 3.968400  | -0.176925 | -0.503197 | N      | 1.818785  | -2.570366 | -0.165280 |
| H      | 3.182171  | 1.039134  | 1.962863  | C      | 4.391843  | 1.146002  | -0.373992 | C      | 1.379553  | -1.191677 | -0.060385 |
| H      | 6.135038  | -0.318360 | -1.767211 | C      | 4.923849  | -1.188234 | -0.338432 | H      | 1.504408  | -0.853652 | 0.976079  |
| C      | 6.040418  | 0.356881  | 0.278383  | H      | 3.674660  | 1.954136  | -0.501912 | C      | 2.241724  | -0.283604 | -0.966376 |
| H      | 5.643715  | 1.035880  | 2.270515  | C      | 5.717729  | 1.462069  | -0.090852 | C      | -0.092094 | -1.042940 | -0.466017 |
| O      | 7.379667  | 0.380147  | 0.504586  | C      | 6.248185  | -0.888870 | -0.054994 | H      | 2.249292  | -0.737044 | -1.965760 |
| H      | 7.835303  | 0.104829  | -0.297262 | H      | 4.607340  | -2.223241 | -0.413165 | H      | 1.750415  | 0.691136  | -1.070237 |
| O      | -0.892201 | -2.240978 | -0.379484 | H      | 6.023165  | 2.502819  | 0.000769  | C      | 3.644186  | -0.076162 | -0.459459 |
| H      | 1.127664  | -2.862537 | -0.845174 | C      | 6.652796  | 0.441417  | 0.069561  | C      | 4.037722  | 1.163441  | 0.045061  |
| H      | 2.648010  | -2.340056 | -0.475333 | H      | 6.987476  | -1.673353 | 0.071719  | C      | 4.588701  | -1.110748 | -0.462404 |
| N      | -1.088468 | -0.025276 | 0.007964  | O      | 7.962882  | 0.678558  | 0.343668  | H      | 3.327772  | 1.987874  | 0.056400  |
| H      | -0.644901 | 0.882974  | 0.022623  | H      | 8.101208  | 1.629459  | 0.397187  | C      | 5.324511  | 1.376502  | 0.531710  |
| C      | -2.517236 | -0.001510 | -0.201545 | O      | -0.329079 | -2.028586 | -0.375452 | C      | 5.874140  | -0.913949 | 0.020155  |
| H      | -2.780883 | -0.463574 | -1.164853 | H      | 1.672945  | -3.076592 | -0.038878 | H      | 4.291429  | -2.087585 | -0.828950 |
| C      | -3.292801 | -0.785415 | 0.861317  | H      | 1.964129  | -2.802213 | 1.529369  | H      | 5.607663  | 2.354571  | 0.916532  |
| C      | -2.915345 | 1.461573  | -0.263439 | N      | -0.351719 | 0.097227  | 0.392782  | C      | 6.249478  | 0.334342  | 0.519863  |
| H      | -2.730739 | -1.710142 | 1.034528  | H      | 0.150988  | 0.896734  | 0.754322  | H      | 6.605153  | -1.716215 | 0.017096  |
| H      | -3.349198 | -0.235799 | 1.807089  | C      | -1.734914 | 0.312251  | 0.050491  | O      | 7.522478  | 0.473810  | 0.975922  |
| C      | -4.668419 | -1.197319 | 0.361492  | H      | -1.927637 | -0.101562 | -0.945832 | H      | 7.643403  | 1.376986  | 1.285541  |
| O      | -2.121266 | 2.377355  | -0.294389 | C      | -2.691660 | -0.389114 | 1.051222  | O      | -0.631593 | -1.845806 | -1.220178 |
| O      | -4.917445 | -1.356098 | -0.820051 | C      | -1.956423 | 1.810745  | 0.020165  | H      | 1.336184  | -2.965699 | -0.971760 |
| N      | -5.590816 | -1.408843 | 1.337656  | H      | -2.218745 | -1.350577 | 1.272309  | H      | 1.478761  | -3.095130 | 0.634467  |
| H      | -6.474220 | -1.808045 | 1.065297  | H      | -2.723447 | 0.183703  | 1.984784  | N      | -0.742341 | 0.036518  | 0.026254  |
| H      | -5.351744 | -1.381456 | 2.313351  | C      | -4.075976 | -0.632643 | 0.514943  | H      | -0.278025 | 0.718484  | 0.610498  |
| O      | -4.235163 | 1.620879  | -0.277855 | O      | -1.176864 | 2.618023  | 0.479374  | C      | -2.093506 | 0.349376  | -0.372812 |
| C      | -4.686456 | 2.972670  | -0.374357 | C      | -5.181782 | 0.080555  | 0.978703  | H      | -2.199361 | 0.139240  | -1.444440 |
| H      | -5.773948 | 2.918064  | -0.386034 | C      | -4.268088 | -1.605191 | -0.471824 | C      | -3.120617 | -0.500768 | 0.402006  |
| H      | -4.337460 | 3.556215  | 0.480876  | H      | -5.045212 | 0.835807  | 1.749249  | C      | -2.283555 | 1.834908  | -0.134609 |
| H      | -4.315107 | 3.433867  | -1.292238 | C      | -6.453438 | -0.168313 | 0.469424  | H      | -2.711130 | -1.514859 | 0.426543  |
|        |           |           |           | C      | -5.536042 | -1.852304 | -0.986057 | H      | -3.196158 | -0.158116 | 1.438783  |
| 326    |           |           |           | H      | -3.410584 | -2.173219 | -0.827265 | C      | -4.509915 | -0.539324 | -0.218434 |
| TyrCys |           |           |           | H      | -7.305183 | 0.391899  | 0.845112  | O      | -1.533479 | 2.516428  | 0.527968  |
| N      | 1.608848  | -1.999678 | -1.032796 | C      | -6.633444 | -1.133846 | -0.516406 | H      | -4.880799 | 0.477518  | -0.393257 |
| C      | 0.983395  | -1.101457 | -0.083059 | H      | -5.669832 | -2.612919 | -1.750110 | H      | -4.479378 | -1.034778 | -1.196527 |
| H      | 1.147902  | -1.395281 | 0.972840  | H      | -7.625081 | -1.329878 | -0.913985 | C      | -5.502491 | -1.220993 | 0.709693  |
| C      | 1.534822  | 0.324831  | -0.248775 | O      | -3.117970 | 2.128638  | -0.543596 | O      | -5.427689 | -1.137503 | 1.923881  |
| C      | -0.529988 | -1.233714 | -0.280516 | C      | -3.428262 | 3.523130  | -0.561100 | N      | -6.508064 | -1.892365 | 0.088348  |
| H      | 1.265296  | 0.682342  | -1.248665 | H      | -4.412326 | 3.598263  | -1.021244 | H      | -7.187560 | -2.362149 | 0.663979  |
| H      | 1.070049  | 0.993051  | 0.487190  | H      | -3.445429 | 3.925917  | 0.454263  | H      | -6.525827 | -2.036687 | -0.905627 |



|        |           |           |           |        |           |           |           |        |           |           |           |
|--------|-----------|-----------|-----------|--------|-----------|-----------|-----------|--------|-----------|-----------|-----------|
| H      | 7.046764  | -1.502768 | 0.887569  | H      | 3.302893  | 1.016034  | -0.860655 | H      | 3.680912  | -1.758493 | -1.031397 |
| H      | 7.816510  | -1.819704 | -0.679728 | C      | 3.595704  | 1.095933  | 1.265162  | H      | 4.355330  | 2.673759  | 1.070904  |
| H      | 7.369813  | -0.157693 | -0.245003 | C      | 3.561064  | -0.994069 | -0.126177 | C      | 5.289106  | 0.822487  | 0.478757  |
| O      | 3.225725  | 2.331781  | 0.710488  | H      | 3.142221  | 2.095197  | 1.310926  | H      | 5.941896  | -1.095237 | -0.214239 |
| C      | 3.463664  | 3.727326  | 0.504543  | H      | 3.264413  | 0.521148  | 2.144865  | O      | 6.541826  | 1.124472  | 0.912982  |
| H      | 4.363831  | 3.959239  | 1.071964  | O      | 4.996721  | 1.141906  | 1.155884  | H      | 6.532118  | 2.008007  | 1.294391  |
| H      | 3.611204  | 3.938468  | -0.556923 | O      | 2.997196  | -1.962159 | 0.338774  | O      | -1.263209 | -2.207831 | -1.316055 |
| H      | 2.617928  | 4.315081  | 0.868098  | H      | 5.332522  | 1.697122  | 1.864894  | H      | 0.892304  | -1.030886 | -1.424861 |
| 335    |           |           |           | O      | 4.706010  | -1.039650 | -0.795930 | H      | 1.132679  | -3.441970 | 0.119685  |
| TyrPro |           |           |           | C      | 5.300545  | -2.334704 | -0.892316 | N      | -1.503418 | -0.591474 | 0.260835  |
| N      | -0.387980 | -1.654491 | -2.065387 | H      | 6.218773  | -2.195075 | -1.460870 | H      | -1.021825 | 0.082690  | 0.838367  |
| C      | 0.055878  | -1.129654 | -0.786322 | H      | 5.521335  | -2.728330 | 0.102540  | C      | -2.847755 | -0.245662 | -0.111467 |
| H      | 0.033215  | -0.038530 | -0.841726 | H      | 4.629901  | -3.027167 | -1.406522 | H      | -3.072674 | -0.778216 | -1.042881 |
| C      | -0.900714 | -1.576951 | 0.341356  | 337    |           |           |           | C      | -3.883713 | -0.652544 | 0.943648  |
| C      | 1.455485  | -1.646832 | -0.435017 | TyrTyr |           |           |           | C      | -2.910657 | 1.253525  | -0.368426 |
| H      | -1.046817 | -2.658515 | 0.228191  | N      | 2.600313  | -2.529013 | 0.488160  | H      | -4.872491 | -0.388886 | 0.538530  |
| H      | -0.405394 | -1.436138 | 1.310644  | C      | 2.142230  | -1.161913 | 0.327650  | C      | -3.831365 | -2.137644 | 1.251410  |
| C      | -2.217521 | -0.846697 | 0.356452  | H      | 2.352262  | -0.602169 | 1.247990  | O      | -3.588536 | 0.136731  | 2.083350  |
| C      | -2.556665 | -0.021712 | 1.428929  | C      | 2.899299  | -0.475537 | -0.831903 | O      | -1.984379 | 2.014705  | -0.216914 |
| C      | -3.135509 | -0.958540 | -0.696998 | C      | 0.637442  | -1.108653 | 0.036314  | H      | -2.850907 | -2.400706 | 1.656382  |
| H      | -1.867821 | 0.080784  | 2.265099  | H      | 2.823071  | -1.136747 | -1.704362 | H      | -4.596752 | -2.402549 | 1.989490  |
| C      | -3.763939 | 0.671248  | 1.464049  | H      | 2.380682  | 0.452875  | -1.098720 | H      | -4.007408 | -2.735572 | 0.352642  |
| C      | -4.340757 | -0.272283 | -0.677178 | C      | 4.337875  | -0.164734 | -0.515472 | H      | -4.189559 | -0.120078 | 2.789272  |
| H      | -2.874815 | -1.577060 | -1.549774 | C      | 5.297118  | -1.174303 | -0.395965 | O      | -4.123854 | 1.622521  | -0.789377 |
| H      | -4.005708 | 1.305074  | 2.315433  | C      | 4.751701  | 1.155470  | -0.314069 | C      | -4.278776 | 3.022117  | -1.027449 |
| C      | -4.662766 | 0.546392  | 0.406917  | H      | 4.991548  | -2.207193 | -0.524986 | H      | -5.304321 | 3.152628  | -1.370845 |
| H      | -5.050701 | -0.359847 | -1.493579 | C      | 6.618538  | -0.875007 | -0.085727 | H      | -4.106221 | 3.586579  | -0.108146 |
| O      | -5.859209 | 1.191749  | 0.376338  | C      | 6.068695  | 1.470233  | -0.404394 | H      | -3.572611 | 3.361893  | -1.788603 |
| H      | -5.954831 | 1.705277  | 1.184605  | H      | 4.027048  | 1.961872  | -0.406668 | 339    |           |           |           |
| O      | 1.778043  | -2.786530 | -0.749673 | H      | 7.350225  | -1.676448 | 0.002452  | TyrTrp |           |           |           |
| H      | -0.052457 | -2.616442 | -2.110358 | C      | 7.011051  | 0.449640  | 0.111045  | N      | 2.547871  | -2.265627 | 1.119349  |
| H      | 0.102486  | -1.160686 | -2.805887 | H      | 6.384337  | 2.497435  | 0.146767  | C      | 2.208898  | -0.929612 | 0.667003  |
| N      | 2.280780  | -0.858354 | 0.305949  | O      | 8.289258  | 0.800920  | 0.412182  | H      | 2.528829  | -0.203280 | 1.424899  |
| C      | 3.547647  | -1.376290 | 0.807478  | H      | 8.826049  | 0.003412  | 0.458094  | C      | 2.949469  | -0.605794 | -0.649885 |
| C      | 2.089996  | 0.540706  | 0.631251  | O      | 0.051614  | -2.059880 | -0.471246 | C      | 0.700675  | -0.784171 | 0.430023  |
| H      | 4.332961  | -1.293263 | 0.403532  | H      | 2.056377  | -3.092127 | -0.165182 | H      | 2.761332  | -1.438617 | -1.339404 |
| H      | 3.433355  | -2.433197 | 1.054463  | H      | 2.342614  | -2.865882 | 1.410551  | H      | 2.497161  | 0.283053  | -1.105557 |
| C      | 3.821726  | -0.467601 | 1.998082  | N      | 0.009854  | 0.052441  | 0.332988  | C      | 4.426955  | -0.372900 | -0.478088 |
| C      | 3.316773  | 0.889612  | 1.510404  | H      | 0.498077  | 0.836100  | 0.745061  | C      | 4.966302  | 0.902630  | -0.646007 |
| H      | 1.159151  | 0.704368  | 1.189976  | C      | -1.380615 | 0.260967  | 0.013184  | C      | 5.302065  | -1.412868 | -0.138062 |
| C      | 2.051558  | 1.434803  | -0.600639 | H      | -1.588964 | -0.156779 | -0.977366 | H      | 4.313386  | 1.730187  | -0.915507 |
| H      | 4.876138  | -0.445272 | 2.284977  | C      | -2.307102 | -0.441039 | 1.040286  | C      | 6.327589  | 1.145377  | -0.483990 |
| H      | 3.240182  | -0.804330 | 2.863269  | C      | -1.610149 | 1.757687  | -0.009456 | C      | 6.660310  | -1.186125 | 0.028227  |
| H      | 4.084572  | 1.371453  | 0.895182  | H      | -1.890578 | -1.446705 | 1.155791  | H      | 4.895804  | -2.406525 | 0.018668  |
| H      | 3.054171  | 1.584396  | 2.310205  | H      | -2.208420 | 0.068228  | 2.005635  | H      | 6.723355  | 2.149537  | -0.624976 |
| O      | 2.242735  | 1.083049  | -1.738734 | C      | -3.748463 | -0.533715 | 0.624046  | C      | 7.181258  | 0.097312  | -0.145686 |
| O      | 1.784035  | 2.695579  | -0.235257 | O      | -0.886311 | 2.557385  | 0.544859  | H      | 7.337186  | -1.992852 | 0.291032  |
| C      | 1.734092  | 3.638651  | -1.307342 | C      | -4.740126 | 0.239347  | 1.224985  | O      | 8.519812  | 0.262347  | 0.024688  |
| H      | 0.957411  | 3.361622  | -2.023956 | C      | -4.130126 | -1.415784 | -0.393910 | H      | 8.740383  | 1.186443  | -0.129005 |
| H      | 1.504613  | 4.598852  | -0.847031 | H      | -4.474280 | 0.927211  | 2.024465  | O      | 0.007191  | -1.757629 | 0.149137  |
| H      | 2.694161  | 3.681478  | -1.827129 | C      | -6.070914 | 0.143835  | 0.829033  | H      | 1.929793  | -2.904761 | 0.620398  |
| 336    |           |           |           | C      | -5.450449 | -1.519556 | -0.804020 | H      | 2.301636  | -2.364042 | 2.099366  |
| TyrSer |           |           |           | H      | -3.373286 | -2.037924 | -0.867101 | N      | 0.200461  | 0.468623  | 0.511311  |
| N      | -1.365833 | 2.049732  | -1.004443 | H      | -6.830332 | 0.751970  | 1.317066  | H      | 0.789015  | 1.264174  | 0.719563  |
| C      | -0.722248 | 1.166949  | -0.052622 | C      | -6.430336 | -0.735876 | -0.191041 | C      | -1.177012 | 0.760443  | 0.197238  |
| H      | -0.921998 | 1.440606  | 1.002554  | O      | -5.745581 | -2.206385 | -1.590576 | H      | -1.479210 | 0.181458  | -0.681740 |
| C      | -1.210733 | -0.278882 | -0.247383 | H      | -7.709187 | -0.877359 | -0.625415 | C      | -2.122833 | 0.386841  | 1.372295  |
| C      | 0.789353  | 1.363690  | -0.215777 | H      | -8.278772 | -0.292381 | -0.115840 | C      | -1.250083 | 2.237637  | -0.124176 |
| H      | -0.909677 | -0.609424 | -1.247405 | O      | -2.710244 | 2.083173  | -0.681779 | H      | -1.750185 | -0.574008 | 1.743484  |
| H      | -0.731839 | -0.940791 | 0.485243  | C      | -3.033399 | 3.474639  | -0.686744 | H      | -1.994714 | 1.116727  | 2.179825  |
| C      | -2.703673 | -0.405490 | -0.086517 | H      | -3.172499 | 3.840386  | 0.333282  | C      | -3.556525 | 0.248642  | 0.990208  |
| C      | -3.568245 | -0.160521 | -1.156061 | H      | -2.236205 | 4.050611  | -1.162414 | O      | -0.393869 | 3.038305  | 0.188864  |
| C      | -3.270581 | -0.740381 | 1.147446  | H      | -3.959215 | 3.558531  | -1.253841 | C      | -4.602388 | 1.060618  | 1.336750  |
| H      | -3.150524 | 0.114367  | -2.120182 | 338    |           |           |           | C      | -3.556735 | -1.913434 | -0.473585 |
| C      | -4.947882 | -0.246768 | -1.001894 | TyrThr |           |           |           | C      | -4.109116 | -0.793556 | 0.166871  |
| C      | -4.645375 | -0.830814 | 1.317742  | N      | 1.355792  | -2.729311 | -0.568322 | H      | -4.606734 | 1.951025  | 1.950875  |
| H      | -2.620512 | -0.942624 | 1.996139  | C      | 0.734512  | -1.476595 | -0.182555 | N      | -5.767699 | 0.591209  | 0.777194  |
| H      | -5.602775 | -0.055613 | -1.850159 | H      | 0.897666  | -1.311618 | 0.890050  | C      | -5.499015 | -0.546390 | 0.055855  |
| C      | -5.492747 | -0.583465 | 0.237512  | C      | 1.370746  | -0.295934 | -0.952540 | C      | -4.396608 | -2.741335 | -1.200706 |
| H      | -5.080399 | -1.097217 | 2.275512  | C      | -0.770868 | -1.476123 | -0.466958 | H      | -2.492315 | -2.123600 | -0.393844 |
| O      | -6.830227 | -0.687789 | 0.450116  | H      | 1.397430  | -0.580818 | -2.012333 | H      | -6.677839 | 0.995699  | 0.908117  |
| H      | -7.291891 | -0.498730 | -0.372986 | H      | 0.711192  | 0.577370  | -0.882785 | C      | -6.346459 | -1.380155 | -0.675257 |
| O      | 1.243872  | 2.443454  | -0.576390 | C      | 2.743363  | 0.084887  | -0.463556 | C      | -5.774475 | -2.476968 | -1.300933 |
| H      | -0.793697 | 2.885724  | -1.086969 | C      | 2.957126  | 1.324885  | 0.138983  | H      | -3.987000 | -3.613057 | -1.702459 |
| H      | -2.285232 | 2.313035  | -0.671761 | C      | 3.837590  | -0.781896 | -0.584887 | H      | -7.411790 | -1.180837 | -0.751661 |
| N      | 1.590556  | 0.323398  | 0.110535  | H      | 2.127044  | 2.020490  | 0.242293  | H      | -6.404718 | -3.146969 | -1.878576 |
| H      | 1.223871  | -0.582061 | 0.365518  | C      | 4.213614  | 1.698910  | 0.607640  | O      | -2.372891 | 2.557424  | -0.761498 |
| C      | 3.026649  | 0.417823  | 0.012059  | C      | 5.094541  | -0.423447 | -0.120165 | C      | -2.533831 | 3.947062  | -1.048518 |
|        |           |           |           |        |           |           |           | H      | -2.525148 | 4.534405  | -0.127205 |

|        |           |           |           |        |           |           |           |        |           |           |           |
|--------|-----------|-----------|-----------|--------|-----------|-----------|-----------|--------|-----------|-----------|-----------|
| H      | -1.728879 | 4.299711  | -1.697603 | H      | 3.197921  | 3.192558  | -0.731850 | H      | -4.819306 | -1.324509 | -0.779681 |
| H      | -3.496374 | 4.033582  | -1.550651 | H      | 2.641701  | 3.557733  | 0.918246  | H      | -4.239896 | -2.174962 | 0.669009  |
| 340    |           |           |           |        |           |           |           | 344    |           |           |           |
| TyrVal |           |           |           |        |           |           |           | ThrArg |           |           |           |
| N      | 1.463208  | -2.640292 | 0.081114  | N      | -3.322478 | -2.465334 | -0.255169 | N      | -4.229408 | -2.245636 | -0.424726 |
| C      | 0.869714  | -1.316436 | 0.062761  | C      | -2.997841 | -1.087034 | -0.531801 | C      | -3.731702 | -0.899239 | -0.573566 |
| H      | 0.979742  | -0.860625 | 1.054996  | H      | -2.892808 | -0.936623 | -1.618183 | H      | -3.650502 | -0.643175 | -0.642220 |
| C      | 1.599024  | -0.418166 | -0.961389 | C      | -4.021653 | -0.036154 | -0.046361 | C      | -4.584970 | 0.214048  | 0.073928  |
| C      | -0.618266 | -1.376780 | -0.304398 | C      | -1.640854 | -0.800404 | 0.118676  | C      | -2.322772 | -0.864507 | 0.029290  |
| H      | 1.643606  | -0.975651 | -1.905628 | H      | -3.610997 | 0.959821  | -0.290352 | H      | -4.047159 | 1.167130  | -0.073842 |
| H      | 0.990283  | 0.473121  | -1.155319 | O      | -5.371410 | -0.174499 | -0.736469 | C      | -5.961545 | 0.340361  | -0.564066 |
| C      | 2.974291  | 0.012075  | -0.524545 | H      | -4.134911 | -0.196418 | 1.351983  | O      | -4.678463 | -0.093739 | 1.449288  |
| C      | 3.227434  | 1.343985  | -0.195819 | H      | -5.830249 | -1.142223 | -0.510406 | H      | -6.542291 | -0.577671 | -0.429261 |
| C      | 4.033382  | -0.899456 | -0.421459 | H      | -6.061117 | 0.603574  | -0.390387 | H      | -6.526644 | 1.156119  | -0.099175 |
| H      | 2.426493  | 2.076583  | -0.270437 | H      | -5.278329 | -0.074821 | -1.822502 | H      | -5.888752 | 0.555707  | -1.634737 |
| C      | 4.487119  | 1.764525  | 0.221925  | H      | -4.770356 | 0.449718  | 1.674752  | H      | -5.194941 | 0.598202  | 1.873402  |
| C      | 5.293375  | -0.495531 | -0.005277 | O      | -1.203906 | -1.468987 | 1.043235  | O      | -1.945670 | -1.685986 | 0.852561  |
| H      | 3.847622  | -1.943455 | -0.650933 | H      | -3.018128 | -2.662427 | 0.694561  | H      | -3.895955 | -2.589076 | 0.472469  |
| H      | 4.659314  | 2.810562  | 0.469044  | H      | -4.321940 | -2.620833 | -0.306397 | H      | -5.242121 | -2.258672 | -0.410186 |
| C      | 5.527160  | 0.842228  | 0.318168  | N      | -0.967231 | 0.260555  | -0.389959 | N      | -1.537422 | 0.152974  | -0.396224 |
| H      | 6.113101  | -1.202525 | 0.073899  | H      | -1.339304 | 0.822376  | -1.142777 | H      | -1.850035 | 0.819750  | -1.087957 |
| O      | 6.781154  | 1.184592  | 0.716134  | C      | 0.268800  | 0.714352  | 0.196394  | C      | -0.220443 | 0.373771  | 0.151047  |
| H      | 6.800493  | 2.128913  | 0.900779  | H      | 0.190943  | 0.641259  | 1.288189  | H      | -0.250751 | 0.190834  | 1.231257  |
| O      | -1.070320 | -2.92395  | -0.982858 | C      | 1.455742  | -0.156014 | -0.264838 | C      | 0.819037  | -0.576438 | -0.477017 |
| H      | 1.024819  | -3.162153 | -0.677327 | C      | 0.429570  | 2.169992  | -0.197303 | C      | 0.116258  | 1.829223  | -0.103641 |
| H      | 1.189164  | -3.122046 | 0.931763  | H      | 1.138932  | -1.192029 | -0.123000 | H      | 0.370199  | -1.574268 | -0.413974 |
| N      | -1.382615 | -0.350556 | 0.137702  | H      | 1.610684  | -0.003815 | -1.339889 | H      | 0.916908  | -0.332549 | -1.542849 |
| H      | -0.977831 | 0.430127  | -0.636845 | C      | 2.751571  | 0.079447  | 0.507779  | C      | 2.184877  | -0.584662 | 0.197376  |
| C      | -2.765839 | -0.206909 | -0.252310 | O      | -0.187038 | 2.700720  | -1.094945 | O      | -0.423974 | 2.509411  | -0.949220 |
| H      | -2.870038 | -0.501796 | -1.303452 | H      | 3.117983  | 1.101591  | 0.406331  | H      | 2.672288  | 0.390970  | 0.120837  |
| C      | -3.696779 | -1.122517 | 0.587453  | H      | 2.570704  | -0.097955 | 1.576313  | C      | 2.061262  | -0.805673 | 1.266922  |
| C      | -3.100441 | 1.265672  | -0.116793 | C      | 3.877070  | -0.831999 | 0.084511  | C      | 3.108032  | -1.624454 | -0.433921 |
| H      | -3.206572 | -2.101335 | 0.521823  | O      | 5.010977  | -0.477820 | -0.137288 | H      | 2.655413  | -2.621933 | -0.378046 |
| C      | -3.746351 | -0.695817 | 2.050671  | O      | 1.343951  | 2.794648  | 0.546771  | H      | 3.258351  | -1.385624 | -1.490692 |
| O      | -5.090875 | -1.260360 | -0.014878 | C      | 1.581078  | 4.161290  | 0.197538  | N      | 4.422951  | -1.701278 | 0.170294  |
| O      | -2.423534 | 2.059768  | 0.499945  | H      | 2.351172  | 4.510798  | 0.883615  | H      | 4.434846  | -0.022742 | 1.128091  |
| H      | -4.268844 | 0.260381  | 2.173574  | H      | 1.922540  | 4.238917  | -0.837052 | C      | 5.350960  | -0.714558 | -0.095888 |
| H      | -4.281274 | -1.439997 | 2.648363  | H      | 0.666887  | 4.747649  | 0.313682  | N      | 5.107233  | 0.208090  | -0.951538 |
| H      | -2.741867 | -0.587578 | 2.470772  | O      | 3.474464  | -2.111106 | 0.001154  | N      | 6.502862  | -0.866195 | 0.677851  |
| H      | -5.043167 | -1.573519 | -1.062851 | C      | 4.491057  | -3.039288 | -0.369075 | H      | 5.938418  | 0.770575  | -1.118857 |
| H      | -5.660593 | -2.017002 | 0.533626  | H      | 4.005545  | -4.014141 | -0.402076 | H      | 6.796730  | -1.826739 | -0.793091 |
| H      | -5.648350 | -0.320689 | 0.030086  | H      | 4.909042  | -2.785115 | -1.346322 | H      | 7.266627  | -0.272386 | 0.392089  |
| O      | -4.233991 | 1.587331  | -0.742120 | H      | 5.299683  | -3.038690 | 0.366210  | O      | 1.089358  | 2.267905  | 0.694497  |
| C      | -4.623252 | 2.957872  | -0.623601 |        |           |           |           | C      | 1.515302  | 3.610370  | 0.452192  |
| H      | -5.554675 | 3.048426  | -1.180712 |        |           |           |           | H      | 2.299875  | 3.805839  | 1.181735  |
| H      | -4.773788 | 3.225267  | 0.424855  |        |           |           |           | H      | 1.903768  | 3.710387  | -0.563777 |
| H      | -3.856436 | 3.610235  | -1.047350 |        |           |           |           | H      | 0.682749  | 4.305101  | 0.584676  |
| 341    |           |           |           | 343    |           |           |           | 345    |           |           |           |
| ThrAsp |           |           |           | ThrAla |           |           |           | ThrAsn |           |           |           |
| N      | -3.752852 | -1.629999 | -0.843758 | N      | 3.276244  | 1.264754  | -0.463135 | N      | -3.518238 | -1.467845 | -0.968785 |
| C      | -3.061990 | -0.378756 | -0.649648 | C      | 2.223749  | 0.285992  | -0.590216 | C      | -2.768069 | -0.264082 | -0.701536 |
| H      | -3.048784 | 0.189954  | -1.592747 | H      | 2.041398  | 0.063701  | -1.653803 | H      | -2.674730 | 0.332150  | -1.622949 |
| C      | -3.650107 | 0.568006  | 0.421436  | C      | 2.475183  | -1.073594 | 0.099475  | C      | -3.358650 | 0.679202  | 0.370681  |
| C      | -1.615079 | -0.713731 | -0.276954 | C      | 0.948475  | 0.910138  | -0.013442 | C      | -1.361928 | -0.692851 | -0.268237 |
| H      | -2.987470 | 1.449949  | 0.480493  | H      | 1.565422  | -1.685410 | -0.035392 | H      | -2.641607 | 1.507411  | 0.512207  |
| C      | -5.050708 | 1.048514  | 0.069549  | C      | 3.647978  | -1.829100 | -0.509895 | C      | -4.695244 | 1.275189  | -0.049036 |
| O      | -3.637023 | -0.143957 | 1.640674  | O      | 2.689346  | -0.800446 | 1.468385  | O      | -3.479175 | -0.081079 | 1.554077  |
| H      | -5.750357 | 0.208366  | 0.018254  | H      | 4.580908  | -1.269089 | -0.390503 | H      | -5.445969 | 0.491552  | -0.192411 |
| H      | -5.423329 | 1.739038  | 0.834463  | H      | 3.781319  | -2.796881 | -0.013305 | H      | -5.073352 | 1.952759  | 0.724653  |
| H      | -5.064709 | 1.577591  | -0.888581 | H      | 3.489109  | -2.022875 | -1.575385 | H      | -4.604654 | 1.849123  | -0.976727 |
| H      | -4.001140 | 0.427713  | 2.323360  | H      | 2.844611  | -1.637062 | 1.917195  | H      | -3.809066 | 0.497563  | 2.248087  |
| O      | -1.295192 | -1.788142 | 0.208705  | O      | 0.977208  | 1.837381  | 0.782018  | O      | -1.137051 | -1.793495 | 0.213745  |
| H      | -3.450380 | -2.262669 | -0.108172 | C      | 3.132437  | 1.745862  | 0.421038  | H      | -4.514451 | -1.296405 | -0.901011 |
| H      | -4.755591 | -1.508954 | -0.767893 | H      | 4.185676  | 0.819686  | -0.435864 | N      | -0.395432 | 0.237740  | -0.457464 |
| N      | -0.713793 | 0.273042  | -0.508609 | N      | -0.211259 | 0.349704  | -0.434478 | H      | -0.622086 | 1.164913  | -0.791718 |
| H      | -0.986354 | 1.172206  | -0.881498 | H      | -0.222042 | -0.458491 | -1.041186 | C      | 0.946898  | 0.079775  | 0.047985  |
| C      | 0.656534  | 0.155522  | -0.086109 | C      | -1.478238 | 0.731402  | 0.137357  | H      | 0.939264  | -0.160553 | 1.121927  |
| H      | 0.699625  | -0.235379 | 0.937698  | H      | -1.356009 | 0.849084  | 1.221880  | C      | 1.712585  | -1.061888 | -0.627992 |
| C      | 1.450261  | -0.812199 | -0.987006 | C      | -2.009149 | 2.051540  | -0.428544 | C      | 1.625932  | 1.427056  | -0.116769 |
| C      | 1.248762  | 1.552365  | -0.108627 | C      | -2.445086 | -0.408278 | -0.111940 | H      | 1.001605  | -1.889989 | -0.729364 |
| H      | 0.884074  | -1.749878 | -0.985907 | H      | -2.155775 | 1.976227  | -1.509997 | H      | 2.056765  | -0.781329 | -1.629224 |
| H      | 1.507728  | -0.434162 | -2.009805 | H      | -2.957722 | 2.318368  | 0.043053  | C      | 2.854344  | -1.564211 | 0.240095  |
| C      | 2.851185  | -1.105321 | -0.513972 | H      | -1.274487 | 2.832445  | -0.224034 | O      | 1.045980  | 2.441398  | -0.442251 |
| O      | 0.665450  | 2.532796  | -0.515430 | O      | -2.196378 | -1.383451 | -0.786658 | O      | 2.869509  | -1.432084 | 1.451024  |
| O      | 3.845676  | -1.035028 | -1.195077 | O      | -3.616380 | -0.198062 | 0.490927  | N      | 3.847641  | -2.201080 | -0.437176 |
| O      | 2.497734  | 1.561579  | 0.352266  | C      | -4.596294 | -1.216495 | 0.284330  | H      | 4.544522  | -2.680999 | 0.109037  |
| C      | 3.162328  | 2.826119  | 0.296284  | H      | -5.480617 | -0.890299 | 0.830139  | H      | 3.759532  | -2.430419 | -1.411987 |
| H      | 4.167837  | 2.646220  | 0.673234  |        |           |           |           |        |           |           |           |

|        |           |           |           |        |           |           |           |        |           |           |           |
|--------|-----------|-----------|-----------|--------|-----------|-----------|-----------|--------|-----------|-----------|-----------|
| O      | 2.930122  | 1.365001  | 0.133288  | H      | 2.443077  | 3.783029  | -0.364831 | H      | 2.617025  | 1.550551  | 0.142446  |
| C      | 3.632343  | 2.603896  | 0.027939  | H      | 1.618737  | 4.014384  | 1.192192  | C      | 4.650995  | 1.080392  | 0.618047  |
| H      | 4.669990  | 2.373393  | 0.264528  |        |           |           |           | O      | 3.487488  | 0.525121  | -1.438310 |
| H      | 3.546993  | 3.009235  | -0.983123 | 348    |           |           |           | H      | 5.399293  | 0.300947  | 0.442519  |
| H      | 3.230045  | 3.332200  | 0.735772  | ThrGly |           |           |           | H      | 5.050725  | 2.015610  | 0.209914  |
| 346    |           |           |           | N      | 3.068114  | 1.177053  | -0.941207 | H      | 4.531074  | 1.215095  | 1.697679  |
| ThrCys |           |           |           | C      | 2.057248  | 0.178485  | -0.690837 | H      | 3.872889  | 1.322954  | -1.812990 |
| N      | -3.469669 | -1.522245 | -0.608221 | H      | 1.782290  | -0.324481 | -1.632162 | O      | 1.121631  | -1.607546 | -0.980347 |
| C      | -2.631435 | -0.348278 | -0.615947 | C      | 2.441905  | -0.942285 | 0.300954  | H      | 3.216190  | -2.126597 | -0.611959 |
| H      | -2.502134 | 0.010574  | -1.649206 | C      | 0.817595  | 0.909275  | -0.164797 | H      | 4.453485  | -1.595270 | 0.331518  |
| C      | -3.140049 | 0.859906  | 0.203800  | H      | 1.553198  | -1.585232 | 0.429763  | N      | 0.345322  | 0.042307  | 0.356334  |
| C      | -1.258855 | -0.768291 | -0.083589 | C      | 3.584680  | -1.808027 | -0.210983 | H      | 0.538807  | 0.768837  | 1.031578  |
| H      | -2.374038 | 1.652614  | 0.131562  | O      | 2.776511  | -0.309573 | 1.518204  | C      | -0.968470 | 0.059699  | -0.240774 |
| C      | -4.451826 | 1.416397  | -0.330732 | H      | 4.497140  | -1.217549 | -0.341230 | H      | -0.862757 | -0.052109 | -1.326957 |
| O      | -3.269554 | 0.415373  | 1.537550  | H      | 3.811130  | -2.606557 | 0.504526  | C      | -1.848151 | -1.113456 | 0.270636  |
| H      | -5.249622 | 0.669972  | -0.263445 | H      | 3.333141  | -2.280164 | -1.165875 | C      | -1.558749 | 0.323220  | 0.059568  |
| H      | -4.767006 | 2.286373  | 0.256212  | H      | 3.013956  | -0.992561 | 2.152691  | H      | -1.186355 | -1.982768 | 0.164654  |
| H      | -4.356805 | 1.737370  | -1.372878 | O      | 0.875905  | 2.015587  | 0.348468  | C      | -2.201564 | -0.943199 | 1.744783  |
| H      | -3.582884 | 1.153433  | 2.069099  | H      | 2.984361  | 1.877416  | -0.208740 | C      | -3.070137 | -1.362091 | 0.618372  |
| O      | -1.103972 | -1.750010 | 0.626552  | H      | 3.996451  | 0.775585  | -0.888857 | O      | -1.108141 | 2.192229  | 0.881236  |
| H      | -3.282986 | -2.024575 | 0.255337  | N      | -0.350102 | 0.323711  | -0.283936 | H      | -2.920996 | -0.128467 | 1.893815  |
| H      | -4.450205 | -1.268968 | -0.623325 | H      | -0.419619 | -0.654293 | -0.762453 | H      | -2.646839 | -1.854702 | 2.151778  |
| N      | -0.226941 | 0.036569  | -0.442595 | C      | -1.577376 | 0.791209  | 0.201804  | H      | -1.310492 | -0.720474 | 2.339542  |
| H      | -0.359896 | 0.857140  | -0.108076 | C      | -2.700188 | -0.171016 | -0.089701 | H      | -3.779196 | -0.531792 | -0.519896 |
| C      | 1.098126  | -0.154185 | 0.088065  | H      | -1.535864 | 0.985134  | 1.280950  | H      | -2.744334 | -1.361651 | -1.666648 |
| H      | 1.045728  | -0.355772 | 1.164865  | H      | -1.798378 | 1.758352  | -0.268296 | C      | -3.774443 | -2.680995 | -0.320761 |
| C      | 1.774854  | -1.359690 | -0.588514 | O      | -2.561648 | -1.232346 | -0.655570 | H      | -4.202968 | -2.699283 | 0.686125  |
| C      | 1.854889  | 1.140841  | -0.146487 | O      | -3.866148 | 0.299242  | 0.354019  | H      | -4.593400 | -2.852607 | -1.025933 |
| H      | 1.085335  | -2.194947 | -0.458194 | H      | -4.991844 | -0.547485 | 0.115305  | H      | -3.082306 | -3.526202 | -0.403843 |
| H      | 1.898030  | -1.158911 | -1.656752 | H      | -4.859080 | -1.511152 | 0.612618  | O      | -2.643482 | 1.679089  | -0.674413 |
| S      | 3.377562  | -1.807636 | 0.172488  | H      | -5.850541 | -0.019304 | 0.527379  | C      | -3.268303 | 2.937257  | -0.412576 |
| O      | 1.448612  | 2.046280  | -0.841557 | H      | -5.123343 | -0.717760 | -0.955758 | H      | -4.125652 | 2.985563  | -1.082580 |
| H      | 3.251269  | -3.128390 | -0.041147 | 349    |           |           |           | H      | -3.590289 | 2.997439  | 0.629641  |
| O      | 3.024386  | 1.146307  | 0.485050  | ThrGln |           |           |           | H      | -2.575667 | 3.757411  | -0.614947 |
| C      | 3.842536  | 2.296505  | 0.258648  | N      | -3.457013 | -2.182428 | -0.370355 | 351    |           |           |           |
| H      | 4.756588  | 2.120567  | 0.823157  | C      | -2.934824 | -0.852786 | -0.571583 | ThrHis |           |           |           |
| H      | 4.061955  | 2.404869  | -0.805793 | H      | -2.830260 | -0.650020 | -1.649257 | N      | -3.784790 | -2.026110 | -0.314679 |
| H      | 3.336713  | 3.197741  | 0.612265  | C      | -3.779101 | 0.304546  | 0.008063  | C      | -3.175493 | -0.734581 | -0.519056 |
| 347    |           |           |           | C      | -1.537458 | -0.812325 | 0.054803  | H      | -3.087854 | -0.530624 | -1.598249 |
| ThrPhe |           |           |           | H      | -3.228273 | 1.242272  | -0.184813 | C      | -3.918772 | 0.475515  | 0.091565  |
| N      | -3.880513 | -1.904035 | -0.855649 | C      | -5.148239 | 0.413992  | -0.648167 | C      | -1.763449 | -0.803247 | 0.070187  |
| C      | -3.357907 | -0.573048 | -0.664438 | O      | -3.887317 | 0.071262  | 1.396964  | H      | -3.301114 | 1.370297  | -0.101877 |
| H      | -3.421838 | -0.007130 | -1.607308 | H      | -5.741938 | -0.487859 | -0.468283 | C      | -5.288364 | 0.695062  | -0.535155 |
| C      | -4.062940 | 0.288815  | 0.407595  | H      | -5.706078 | 1.261329  | -0.233808 | O      | -4.016697 | 0.229438  | 1.478207  |
| C      | -1.878581 | -0.713497 | -0.295003 | H      | -5.063667 | 0.569579  | -1.728272 | H      | -5.943268 | -0.163139 | -0.354248 |
| H      | -3.521429 | 1.249785  | 0.464814  | H      | -4.411847 | 0.782418  | 1.777178  | H      | -5.773724 | 1.574784  | -0.097922 |
| C      | -5.515040 | 0.582091  | 0.058214  | O      | -1.184541 | -1.601076 | 0.919564  | H      | -5.214581 | 0.860295  | -1.614745 |
| O      | -3.954313 | -0.414499 | 1.627231  | H      | -3.176842 | -2.479697 | 0.560457  | H      | -4.463183 | 0.978877  | 1.883618  |
| H      | -6.100056 | -0.341668 | 0.006083  | H      | -4.468871 | -2.186334 | -0.414169 | O      | -1.454582 | -1.604407 | 0.938005  |
| H      | -5.973586 | 1.217028  | 0.824635  | N      | -0.726267 | 0.172756  | -0.400389 | H      | -3.530298 | -2.336399 | 0.619267  |
| H      | -5.598872 | 1.106133  | -0.899120 | H      | -1.027569 | 0.840069  | -1.096491 | H      | -4.794603 | -1.962801 | -0.363275 |
| H      | -4.384269 | 0.107829  | 2.311157  | C      | 0.568691  | 0.402807  | 0.189755  | N      | -0.888145 | 0.113300  | -0.417623 |
| O      | -1.419970 | -1.739139 | 0.188863  | H      | 0.486476  | 0.267062  | 1.275450  | H      | -1.112673 | 0.688479  | -1.217132 |
| H      | -3.474575 | -2.495598 | -0.135642 | C      | 1.624145  | -0.582959 | -0.353034 | C      | 0.475238  | 0.183828  | 0.054560  |
| H      | -4.887507 | -1.918266 | -0.747753 | C      | 0.932581  | 1.844323  | -0.106262 | H      | 0.479469  | 0.058181  | 1.140512  |
| N      | -1.115734 | 0.383192  | -0.519528 | H      | 1.123546  | -1.553687 | -0.412827 | C      | 1.326071  | -0.925664 | -0.594048 |
| H      | -1.491937 | 1.233466  | -0.915229 | H      | 1.920097  | -0.306800 | -1.370121 | C      | 0.988293  | 1.561769  | -0.321021 |
| C      | 0.266306  | 0.417658  | -0.117872 | C      | 2.868163  | -0.714396 | 0.514986  | H      | 0.802871  | -1.863636 | -0.370437 |
| H      | 0.362683  | -0.033755 | 0.875941  | O      | 0.358444  | 2.537490  | -0.916582 | H      | 1.282586  | -0.779936 | -1.681416 |
| C      | 1.169535  | -0.381594 | -1.095416 | H      | 3.291415  | 0.274234  | 0.728254  | C      | 2.745979  | -0.992538 | -0.138893 |
| C      | 0.672679  | 1.874684  | -0.047521 | H      | 2.612567  | -1.164103 | 1.481991  | O      | 0.703578  | 2.108170  | -1.364921 |
| H      | 0.593299  | -1.276921 | -1.347062 | C      | 3.948958  | -1.511020 | -0.197203 | N      | 3.710899  | -1.630750 | -0.885520 |
| H      | 1.302175  | 0.194034  | -2.018357 | O      | 4.147934  | -1.415586 | -1.396470 | C      | 3.413607  | -0.574397 | 0.986790  |
| C      | 2.495146  | -0.793535 | -0.516138 | N      | 4.713008  | -2.299200 | 0.605538  | H      | 3.567197  | -2.074306 | -1.778101 |
| O      | 0.031411  | 2.780675  | -0.536114 | H      | 5.423492  | -2.863733 | 0.168977  | C      | 4.880039  | -1.568655 | -0.193141 |
| C      | 3.693626  | -0.212853 | -0.932338 | H      | 4.477678  | -2.471147 | 1.566983  | N      | 4.736825  | -0.933000 | 0.942795  |
| C      | 2.536051  | -1.792172 | 0.462590  | O      | 1.977778  | 2.259250  | 0.614721  | H      | 3.011109  | -0.019278 | 1.821898  |
| H      | 3.675017  | 0.560505  | -1.696880 | C      | 2.412232  | 3.593397  | 0.337982  | H      | 5.798376  | -1.999375 | -0.568933 |
| C      | 4.908331  | -0.616901 | -0.384811 | H      | 3.260769  | 3.769448  | 0.997646  | O      | 1.776389  | 2.086876  | 0.611482  |
| C      | 3.747075  | -2.193994 | 1.014998  | H      | 2.711660  | 3.689158  | -0.708041 | C      | 2.359835  | 3.349041  | 0.278829  |
| H      | 1.605389  | -2.258384 | 0.780024  | H      | 1.610266  | 4.305723  | 0.543982  | H      | 2.975129  | 3.622778  | 1.134346  |
| H      | 5.833203  | -0.158705 | -0.724264 | 350    |           |           |           | H      | 2.972600  | 3.258941  | -0.620713 |
| C      | 4.937952  | -1.607005 | 0.592554  | ThrIle |           |           |           | H      | 1.581029  | 4.095374  | 0.106710  |
| H      | 3.762744  | -2.973371 | 1.771686  | N      | 3.457453  | -1.777872 | 0.312112  | 352    |           |           |           |
| H      | 5.884864  | -1.924399 | 1.019816  | C      | 2.703999  | -0.564890 | 0.519759  | ThrLeu |           |           |           |
| O      | 1.830885  | 2.036049  | 0.586694  | H      | 2.562417  | -0.389680 | 1.598242  | N      | -3.496402 | -1.836110 | -0.368805 |
| C      | 2.315923  | 3.378120  | 0.641853  | C      | 3.329046  | 0.728117  | -0.049817 | C      | -2.788726 | -0.594383 | -0.566761 |
| H      | 3.273571  | 3.322600  | 1.157339  | C      | 1.322437  | -0.773329 | -0.110182 | H      | -2.699213 | -0.379621 | -1.643814 |



|        |           |           |           |        |           |           |           |           |           |           |           |
|--------|-----------|-----------|-----------|--------|-----------|-----------|-----------|-----------|-----------|-----------|-----------|
| H      | -2.284111 | 0.769340  | 1.430044  | 360    |           | H         | 2.807631  | -3.613830 | -0.645732 |           |           |
| C      | -2.704362 | -0.999979 | 0.305716  | ThrVal |           | H         | 2.964498  | -3.045239 | -2.324968 |           |           |
| C      | -1.109455 | 0.802521  | -0.362811 | N      | 3.459381  | -1.505701 | 0.237059  | O         | 4.535612  | 0.770002  | 0.622700  |
| H      | -1.811173 | -1.519688 | 0.693295  | C      | 2.535050  | -0.430162 | 0.503170  | C         | 5.935538  | 0.522549  | 0.711808  |
| C      | -3.902287 | -1.403841 | 1.153938  | H      | 2.361527  | -0.340538 | 1.587550  | H         | 6.165060  | -0.496533 | 0.389629  |
| O      | -2.906296 | -1.316382 | -1.056874 | C      | 2.967622  | 0.971350  | 0.017235  | H         | 6.408992  | 1.247603  | 0.050496  |
| H      | -4.816906 | -0.919486 | 0.796836  | C      | 1.202959  | -0.797762 | -0.159760 | H         | 6.287040  | 0.652679  | 1.738181  |
| H      | -4.062705 | -2.486305 | 1.100266  | H      | 2.138328  | 1.666802  | 0.237894  |           |           |           |           |
| H      | -3.754276 | -1.142258 | 2.206530  | C      | 4.213064  | 1.478515  | 0.730985  | 362       |           |           |           |
| H      | -3.006095 | -2.270520 | -1.126908 | O      | 3.172951  | 0.872152  | -1.376360 | TrpGlu    |           |           |           |
| O      | -1.073011 | 1.282379  | -1.484759 | H      | 5.072223  | 0.829978  | 0.532033  | N         | -1.678897 | -1.017075 | 3.759056  |
| H      | -3.273926 | 1.393381  | -1.213364 | H      | 4.473675  | 2.483658  | 0.380656  | C         | -1.540663 | -0.666847 | 2.358210  |
| H      | -4.360526 | 0.994365  | -0.049093 | H      | 4.059382  | 1.534688  | 1.813244  | H         | -1.712803 | -1.518433 | 1.673337  |
| N      | 0.011619  | 0.463981  | 0.330042  | H      | 3.439499  | 1.738149  | -1.699555 | C         | -2.564337 | 0.435751  | 2.001919  |
| H      | -0.070868 | -0.037220 | 1.202166  | O      | 1.132185  | -1.593890 | -1.084171 | C         | -0.073770 | -0.280869 | 2.131981  |
| C      | 1.291418  | 0.384322  | -0.316657 | H      | 3.269334  | -1.836701 | -0.705510 | H         | -3.490549 | 0.160215  | 2.521271  |
| H      | 1.121460  | 0.498110  | -1.393758 | H      | 4.417011  | -1.177220 | 0.267804  | H         | -2.239053 | 1.376764  | 2.458271  |
| C      | 2.264248  | 1.482412  | 0.133767  | N      | 0.114483  | -0.162688 | 0.339882  | C         | -2.857069 | 0.624644  | 0.546425  |
| C      | 1.883628  | -0.990112 | -0.045097 | H      | 0.194482  | 0.533763  | 1.067730  | C         | -2.580602 | 1.729280  | -0.220817 |
| H      | 3.175386  | 1.369035  | -0.473620 | C      | -1.180165 | -0.280168 | -0.286713 | C         | -3.521105 | -0.308381 | -0.327929 |
| C      | 1.683847  | 2.870956  | -0.059553 | H      | -1.043665 | -0.310085 | -1.374556 | H         | -2.080673 | 2.647613  | 0.053734  |
| O      | 2.541534  | 1.206941  | 1.496567  | C      | -1.906851 | -1.586644 | 0.131970  | N         | -3.025962 | 1.537597  | -1.505926 |
| O      | 1.377525  | -1.827738 | 0.664527  | C      | -1.950052 | 0.972785  | 0.081234  | C         | -3.601787 | 0.296633  | -1.607361 |
| H      | 0.788849  | 2.990603  | 0.556025  | H      | -1.143919 | -2.357025 | -0.031867 | C         | -4.068951 | -1.587419 | -0.150417 |
| H      | 2.414344  | 3.634229  | 0.231936  | C      | -2.285334 | -2.563432 | 1.608897  | H         | -2.884465 | 2.181455  | -2.264318 |
| H      | 1.407944  | 3.044400  | -1.103231 | C      | -3.097459 | -1.913530 | -0.762771 | C         | -4.191394 | -0.341965 | -2.699525 |
| H      | 3.088586  | 1.920391  | 1.838927  | O      | -1.628364 | 1.729192  | 0.972450  | C         | -4.657202 | -2.224559 | -1.230322 |
| O      | 3.039889  | -1.157133 | -0.693679 | H      | -3.076874 | -0.850837 | 1.819951  | H         | -4.038998 | -2.071121 | 0.822284  |
| C      | 3.685160  | -2.408993 | -0.461279 | H      | -2.657457 | -2.563432 | 1.912183  | H         | -4.242404 | 0.135445  | 0.764023  |
| H      | 4.601618  | -2.383959 | -1.049775 | H      | -1.425199 | -1.339026 | 2.240808  | C         | -4.713973 | -1.608694 | -2.493130 |
| H      | 3.912897  | -2.529778 | 0.600365  | H      | -2.810151 | -1.923696 | -1.819180 | H         | -5.084293 | -3.214885 | -1.103375 |
| H      | 3.046389  | -3.235462 | -0.781741 | H      | -3.488986 | -2.904927 | -0.514218 | H         | -5.180032 | -2.133655 | -3.321712 |
|        |           |           |           | H      | -3.909084 | -1.190432 | -0.642165 | O         | 0.805400  | -0.651663 | 2.903552  |
| 359    |           |           |           | O      | -3.034321 | 1.144597  | -0.677620 | H         | -2.349236 | -1.767439 | 3.872997  |
| ThrTrp |           |           |           | C      | -3.823651 | 2.291065  | -0.354038 | H         | -0.773299 | -1.341018 | 4.089345  |
| N      | -4.010784 | -1.978315 | -1.228773 | H      | -4.657285 | 2.282038  | -1.054924 | N         | 0.205213  | 0.448149  | 1.027562  |
| C      | -3.692136 | -0.655366 | -0.750089 | H      | -4.185145 | 2.230913  | 0.675128  | H         | -0.532235 | 0.738474  | 0.395200  |
| H      | -3.931676 | 0.090438  | -1.524520 | H      | -3.235454 | 3.204511  | -0.467844 | C         | 1.562316  | 0.825599  | 0.722852  |
| C      | -4.424970 | -0.200566 | 0.532774  |        |           |           |           | H         | 2.090434  | 0.992114  | 1.668326  |
| C      | -2.181519 | -0.611659 | -0.500768 | 361    |           |           |           | C         | 2.292023  | -0.292384 | -0.049841 |
| H      | -4.033034 | 0.797080  | 0.798795  | TrpAsp |           |           |           | C         | 1.519585  | 2.124117  | -0.058340 |
| C      | -5.929747 | -0.084324 | 0.335013  | N      | -1.343510 | 3.831965  | -0.790629 | H         | 2.115976  | -1.211966 | 0.513823  |
| O      | -4.105762 | -1.142181 | 1.535520  | C      | -1.307873 | 2.428348  | -0.426987 | H         | 1.816508  | -0.413925 | -1.030684 |
| H      | -6.367881 | -1.055813 | 0.084784  | H      | -1.725983 | 2.223588  | 0.576619  | C         | 3.796678  | -0.080242 | -0.201711 |
| H      | -6.411934 | 0.264697  | 1.255058  | C      | -2.129407 | 1.613291  | -1.451927 | O         | 0.560276  | 2.521138  | -0.682186 |
| H      | -6.176281 | 0.627843  | -0.458811 | C      | 0.167747  | 2.026546  | -0.318956 | H         | 4.035919  | 0.827185  | -0.757631 |
| H      | -4.537825 | -0.867619 | 2.349943  | H      | -3.027953 | 2.209626  | -1.653507 | H         | 4.249210  | 0.020893  | 0.793637  |
| O      | -1.527378 | -1.624807 | -0.293909 | H      | -1.577789 | 1.582649  | -2.397669 | C         | 4.497390  | -1.217607 | -0.902923 |
| H      | -3.454364 | -2.636743 | -0.690153 | C      | -2.538354 | 0.236986  | -1.030638 | O         | 5.310936  | -1.092057 | -1.787434 |
| H      | -4.989227 | -2.193115 | -1.078687 | C      | -2.140071 | -0.953270 | -1.075052 | O         | 2.684854  | 2.775110  | 0.001454  |
| N      | -1.630999 | 0.624833  | -0.499710 | C      | -3.459854 | -0.106970 | 0.022460  | C         | 2.744711  | 3.987787  | -0.752870 |
| H      | -2.177023 | 1.455738  | -0.680312 | H      | -1.447031 | -1.133595 | -2.396713 | H         | 3.750682  | 4.377681  | -0.604485 |
| C      | -0.241828 | 0.830656  | -0.176067 | N      | -2.750169 | -2.003852 | -0.947286 | H         | 2.560699  | 3.791431  | -1.811621 |
| H      | 0.034312  | 0.179294  | 0.659541  | C      | -3.560004 | -1.520739 | 0.049097  | H         | 1.999658  | 4.699317  | -0.389693 |
| C      | 0.682635  | 0.494929  | -1.379566 | C      | -4.221296 | 0.640660  | 0.933112  | O         | 4.124184  | -2.410518 | -0.408694 |
| C      | -0.097691 | 2.277012  | 0.243609  | H      | -2.563657 | -2.973905 | -1.131483 | C         | 4.765056  | -3.535390 | -1.005836 |
| H      | 0.270315  | -0.426023 | -1.805660 | C      | -4.374905 | -2.194954 | 0.959681  | H         | 4.350185  | -4.412142 | -0.509415 |
| H      | 0.577878  | 1.277944  | -2.139334 | C      | -5.033566 | -0.023416 | 1.837230  | H         | 4.562991  | -3.570449 | -2.079240 |
| C      | 2.111998  | 0.280308  | -1.017124 | H      | -4.180506 | 1.726640  | 0.926741  | H         | 5.846654  | -3.487061 | -0.856605 |
| O      | -0.906959 | 3.141190  | -0.022708 | H      | -4.437621 | -3.279451 | 0.967721  |           |           |           |           |
| C      | 3.185835  | 1.072989  | -1.319667 | C      | -5.106049 | -1.427610 | 1.852321  | 363       |           |           |           |
| C      | 2.037485  | -1.965456 | 0.311720  | H      | -5.626907 | 0.546021  | 2.546401  | TrpAla    |           |           |           |
| C      | 2.629024  | -0.829568 | -0.261897 | H      | -5.750500 | -1.920237 | 2.574326  | N         | -0.475460 | 3.816712  | -0.671032 |
| H      | 3.220901  | 1.998022  | -1.879229 | O      | 1.045032  | 2.869778  | -0.157807 | C         | -0.446506 | 2.418813  | -0.284274 |
| N      | 4.335389  | 0.528443  | -0.795727 | H      | -2.129425 | 4.293491  | -0.349544 | H         | -1.048858 | 2.201103  | 0.617432  |
| C      | 4.027389  | -0.640496 | -0.143527 | H      | -0.486020 | 4.263934  | -0.455957 | C         | -1.005136 | 1.556416  | -1.440017 |
| C      | 2.848415  | -2.866196 | 0.983034  | N      | 0.453200  | 0.705161  | -0.360965 | C         | 0.995339  | 2.089979  | 0.123592  |
| H      | 0.965973  | -2.131692 | 0.223451  | H      | -0.277979 | 0.015882  | -0.500396 | H         | -1.867967 | 2.109017  | -1.832009 |
| H      | 5.259682  | 0.904820  | -0.909798 | C      | 1.813286  | 0.250319  | -0.247251 | H         | -0.270594 | 1.541788  | -2.252357 |
| C      | 4.845620  | -1.547546 | 0.531501  | H      | 2.464687  | 0.907266  | -0.835027 | C         | -1.432496 | 0.166241  | -1.087057 |
| C      | 4.235306  | -2.658720 | 1.092430  | C      | 2.309582  | 0.299888  | 1.214361  | C         | -0.876456 | -1.009832 | -1.525681 |
| H      | 2.408239  | -3.751554 | 1.432260  | C      | 1.894160  | -1.154724 | -0.811550 | C         | -2.536925 | -0.209429 | -0.241181 |
| H      | 5.917881  | -1.392551 | 0.614225  | H      | 2.140874  | 1.329020  | 1.548559  | H         | -0.020433 | -1.166178 | -2.166886 |
| H      | 4.842218  | -3.385322 | 1.624959  | H      | 1.731838  | -0.380222 | 1.843660  | N         | -1.561068 | -2.081234 | -1.005833 |
| O      | 1.032979  | 2.495836  | 0.910243  | C      | 3.771737  | -0.021668 | 1.392237  | C         | -2.580344 | -1.626006 | -0.208426 |
| C      | 1.263150  | 3.853513  | 1.286161  | O      | 0.943180  | -1.823095 | -1.150075 | C         | -3.500252 | 0.511984  | 0.479283  |
| H      | 1.298207  | 4.497546  | 0.404104  | O      | 4.215804  | -0.857196 | 2.142631  | H         | -1.302601 | -3.043771 | -1.133682 |
| H      | 0.469396  | 4.207997  | 1.948040  | O      | 3.158285  | -1.576116 | -0.866038 | C         | -3.536166 | -2.327029 | 0.528456  |
| H      | 2.222157  | 3.856934  | 1.802416  | C      | 3.337722  | -2.923488 | -1.305525 | C         | -4.452057 | -0.178772 | 1.210956  |
|        |           |           |           | H      | 4.410448  | -3.105761 | -1.264990 | H         | -3.504432 | 1.598520  | 0.460143  |

|        |           |           |           |        |           |           |            |           |           |           |           |          |
|--------|-----------|-----------|-----------|--------|-----------|-----------|------------|-----------|-----------|-----------|-----------|----------|
| H      | -3.553402 | -3.413160 | 0.544337  | TrpAsn | N         | -0.960996 | 3.854770   | -0.713667 | H         | 1.845557  | -0.366916 | 2.001421 |
| C      | -4.466642 | -1.584558 | 1.237963  | N      | -0.963834 | 2.442871  | -0.381281  | S         | 4.261035  | -0.032304 | 1.953151  |          |
| H      | -5.201902 | 0.370524  | 1.772459  | C      | -1.390676 | 2.230159  | 0.616193   | O         | 1.603206  | -1.744220 | -0.924420 |          |
| H      | -5.224154 | -2.098611 | 1.822173  | H      | -1.807996 | 1.674364  | -1.425177  | H         | 4.210012  | 0.505197  | 3.184213  |          |
| O      | 1.785815  | 2.978962  | 0.427122  | C      | 0.500825  | 1.992439  | -0.284840  | O         | 3.784584  | -1.216090 | -0.791748 |          |
| H      | -1.344401 | 4.247920  | -0.381045 | C      | -2.687541 | 2.302414  | -1.612796  | C         | 4.107092  | -2.512553 | -1.298146 |          |
| H      | 0.291711  | 4.285572  | -0.195535 | H      | -1.256194 | 1.650179  | -1.2271092 | H         | 5.194257  | -2.547246 | -1.344251 |          |
| N      | 1.336418  | 0.783615  | -0.175028 | H      | -2.257020 | 0.300651  | -1.038546  | H         | 3.725977  | -3.288602 | -0.360648 |          |
| H      | 0.679863  | 0.063492  | -0.104390 | C      | -1.890201 | -0.885224 | -1.624108  | H         | 3.674384  | -2.651091 | -2.291630 |          |
| C      | 2.665405  | 0.392841  | 0.572281  | C      | -3.190522 | -0.044587 | 0.003673   | 367       |           |           |           |          |
| H      | 3.375129  | 1.111184  | 0.144158  | H      | -1.196194 | -1.063728 | -2.433059  | TrpPhe    |           |           |           |          |
| C      | 2.851621  | 0.395184  | 2.093494  | N      | -2.530430 | -1.934863 | -1.012722  | N         | 2.154247  | 3.888919  | 0.189210  |          |
| C      | 2.964116  | -0.970869 | -0.014678 | C      | -3.329618 | -1.455595 | -0.005976  | C         | 1.924643  | 2.464380  | 0.041334  |          |
| H      | 2.158003  | -0.304819 | 2.568700  | C      | -3.933591 | 0.699788  | 0.931830   | H         | 2.249583  | 2.066793  | -0.938829 |          |
| H      | 3.874909  | 0.119678  | 2.358751  | H      | -2.370179 | -2.904302 | -1.222687  | C         | 2.705290  | 1.702634  | 1.137490  |          |
| H      | 2.647112  | 1.402213  | 2.462308  | C      | -4.165055 | -2.129972 | 0.885573   | C         | 0.405990  | 2.247223  | 0.059879  |          |
| O      | 2.162351  | -1.681015 | -0.580246 | C      | -4.765965 | 0.035453  | 1.817615   | H         | 3.683244  | 2.195450  | 1.203518  |          |
| O      | 4.240653  | -1.310020 | 0.188384  | H      | -3.863531 | 1.784086  | 0.952544   | H         | 2.218230  | 1.882335  | 2.101820  |          |
| C      | 4.614348  | -2.595328 | -0.307074 | H      | -4.258387 | -3.212178 | 0.864982   | C         | 2.910035  | 0.237283  | 0.910149  |          |
| H      | 5.669867  | -2.710438 | -0.064013 | C      | -4.877115 | -1.366023 | 1.796713   | C         | 2.390463  | -0.798848 | 1.646783  |          |
| H      | 4.023084  | -3.379408 | 0.172092  | H      | -5.345690 | 0.602945  | 2.539578   | C         | 3.715142  | -0.373137 | -0.116994 |          |
| H      | 4.462182  | -2.649491 | -1.387685 | H      | -5.537175 | -1.859077 | 2.504265   | H         | 1.727063  | -0.769236 | 2.499994  |          |
| 364    |           |           |           | O      | 1.407170  | 2.812007  | -0.164042  | N         | 2.818953  | -2.001965 | 1.142075  |          |
| TrpArg |           |           |           | H      | -1.694664 | 4.340903  | -0.213638  | C         | 3.625590  | -1.777344 | 0.055598  |          |
| N      | 2.784999  | 3.637674  | -1.041122 | H      | -0.064169 | 4.240358  | -0.428072  | C         | 4.512031  | 0.129922  | -1.156096 |          |
| C      | 2.405018  | 2.275459  | -0.716465 | N      | 0.736770  | 0.661759  | -0.276818  | H         | 2.512134  | -2.901699 | 1.467923  |          |
| H      | 2.543807  | 1.570047  | -1.557295 | H      | -0.015569 | 0.006957  | -0.461233  | C         | 4.287082  | -2.676422 | -0.782475 |          |
| C      | 3.265179  | 1.770115  | 0.465081  | C      | 2.084957  | 0.148969  | -0.218526  | C         | 5.172093  | -0.778941 | -0.989250 |          |
| C      | 0.891790  | 2.277355  | -0.459357 | H      | 2.720517  | 0.662103  | -0.956366  | H         | 4.615458  | 1.201648  | -1.303209 |          |
| H      | 4.279910  | 2.140806  | 0.274049  | C      | 2.759896  | 0.387396  | 1.136235   | H         | 4.204918  | -3.749949 | -0.637816 |          |
| H      | 2.934422  | 2.273320  | 1.379923  | C      | 2.038953  | -1.315885 | -0.608079  | C         | 5.056740  | -2.147349 | -1.806062 |          |
| C      | 3.314672  | 0.287400  | 0.663299  | H      | 2.481779  | 1.401311  | 1.444900   | H         | 5.791010  | -0.378941 | -2.797068 |          |
| C      | 2.820739  | -0.426891 | 1.726799  | H      | 2.400117  | -0.314031 | 1.896527   | H         | 5.584594  | -2.818817 | -2.476768 |          |
| C      | 3.920670  | -0.680094 | -0.215655 | C      | 4.275786  | 0.367718  | 1.022447   | O         | -0.368045 | 3.158695  | -0.214858 |          |
| H      | 2.281187  | -0.078595 | 2.596414  | O      | 1.086934  | -1.863397 | -1.121111  | H         | 2.961863  | 4.176550  | -0.349732 |          |
| N      | 3.079920  | -1.765505 | 1.560772  | O      | 4.861709  | 0.625165  | -0.013886  | H         | 1.336769  | 4.373693  | -0.172765 |          |
| C      | 3.745524  | -1.956055 | 0.376569  | N      | 4.930967  | 0.072542  | 2.177245   | N         | -0.025867 | 1.000614  | 0.356708  |          |
| C      | 4.605729  | -0.590656 | -1.436382 | H      | 5.931781  | 0.183590  | 2.185039   | H         | 0.637941  | 0.252496  | 0.524078  |          |
| H      | 2.750498  | -2.492648 | 2.171120  | H      | 4.448116  | -0.021069 | 3.053695   | C         | -1.429046 | 0.674352  | 0.337826  |          |
| C      | 4.216028  | -3.126930 | -0.219789 | O      | 3.181981  | -1.937683 | -0.323033  | H         | -1.994935 | 1.558150  | 0.643182  |          |
| C      | 5.076748  | -1.749372 | -2.031329 | C      | 3.244743  | -3.310127 | -0.707774  | C         | -1.885797 | 0.251915  | -1.081024 |          |
| H      | 4.769693  | 0.374991  | -1.907340 | H      | 4.236906  | -3.651542 | -0.416186  | C         | -1.665683 | -0.450242 | 1.324799  |          |
| H      | 4.070401  | -4.097195 | 0.246660  | H      | 2.471868  | -3.889049 | -0.196233  | H         | -1.649107 | 1.099369  | -1.732654 |          |
| C      | 4.879817  | -3.005227 | -1.430105 | H      | 3.106905  | -3.411635 | -1.786742  | H         | -1.263918 | -0.593181 | -1.396191 |          |
| H      | 5.608153  | -1.691184 | -2.976607 | 366    |           |           |            | C         | -3.344606 | -0.101036 | -1.181381 |          |
| H      | 5.258406  | -3.896639 | -1.921473 | TrpCys |           |           |            | O         | -0.878454 | -1.349497 | 1.531088  |          |
| O      | 0.177264  | 3.171315  | -0.903671 | N      | -0.993401 | 3.802145  | -0.878997  | C         | -3.758861 | -1.435049 | -1.200449 |          |
| H      | 3.516357  | 3.644513  | -1.741440 | C      | -0.929667 | 2.413001  | -0.466923  | C         | -4.316721 | 0.902138  | -1.231851 |          |
| H      | 1.966230  | 4.101940  | -1.426770 | H      | -1.421962 | 2.219135  | 0.505195   | H         | -3.011488 | -2.225094 | -1.169969 |          |
| N      | 0.391129  | 1.236418  | 0.240915  | C      | -1.627005 | 1.532266  | -1.527803  | C         | -5.110650 | -1.761437 | -1.265825 |          |
| H      | 0.999033  | 0.494815  | 0.569341  | C      | 0.546907  | 2.086049  | -0.215708  | C         | -5.668143 | 0.579825  | -1.296188 |          |
| C      | -1.025289 | 1.120820  | 0.491015  | H      | -2.534396 | 2.077044  | -1.817121  | H         | -4.006855 | 1.944781  | -1.224635 |          |
| H      | -1.436052 | 2.129998  | 0.596068  | H      | -1.000687 | 1.503349  | -2.425810  | H         | -5.414466 | -2.804400 | -1.287084 |          |
| C      | -1.748072 | 0.415700  | -0.673968 | C      | -2.001543 | 0.149071  | -1.096324  | C         | -6.069544 | -2.753860 | -1.312577 |          |
| C      | -1.205023 | 0.367394  | 1.793196  | C      | -1.511252 | -1.034620 | -1.590248  | H         | -6.410293 | 1.372007  | -1.338665 |          |
| H      | -1.437015 | 0.954150  | -1.577146 | C      | -2.973841 | -0.212076 | -0.095910  | H         | -7.124653 | -1.005829 | -1.367811 |          |
| H      | -1.357386 | -0.606633 | -0.758435 | H      | -0.758742 | -1.202305 | -2.348064  | O         | -2.857331 | -0.350320 | 1.910204  |          |
| C      | -3.268743 | 0.397505  | -0.582629 | N      | -2.112272 | -2.096711 | -0.961039  | C         | -3.209778 | -1.434676 | 2.769096  |          |
| O      | -0.407189 | -0.426995 | 2.241972  | C      | -3.007900 | -1.627900 | -0.033823  | H         | -4.192055 | -1.186630 | 3.168451  |          |
| H      | -3.606741 | -0.175387 | 0.285306  | C      | -3.828192 | 0.520790  | 0.741577   | H         | -3.252907 | -2.369029 | 2.204319  |          |
| H      | -3.640847 | 1.424189  | -0.460319 | H      | -1.866107 | -3.060735 | -1.101989  | H         | -2.480436 | -1.538971 | 3.575773  |          |
| C      | -3.892370 | -0.228725 | -1.827944 | C      | -3.846843 | -2.317379 | 0.842931   | 368       |           |           |           |          |
| H      | -3.587424 | 0.321264  | -2.726636 | C      | -4.664503 | -0.158614 | 1.611688   | TrpGly    |           |           |           |          |
| H      | -3.539721 | -1.258784 | -1.933005 | H      | -3.839553 | 1.606899  | 0.705169   | N         | 0.216954  | 3.647460  | 0.506147  |          |
| N      | -5.340483 | -0.279196 | -1.811328 | H      | -3.857772 | -3.403033 | 0.879371   | C         | 0.143886  | 2.258817  | 0.095049  |          |
| H      | -5.800250 | 0.620332  | -1.830832 | C      | -4.670068 | -1.563812 | 1.664253   | H         | 0.852663  | 2.109901  | -0.730371 |          |
| C      | -5.977192 | -1.210958 | -1.015911 | H      | -5.329643 | 0.399200  | 2.264137   | C         | 0.580902  | 1.346205  | 1.266781  |          |
| N      | -5.309799 | -2.097138 | -0.373969 | H      | -5.335511 | -2.068362 | 2.358459   | C         | -1.255232 | 1.878800  | -0.410395 |          |
| N      | -7.360683 | -1.027515 | -1.011347 | O      | 1.356582  | 2.971702  | 0.039229   | H         | 1.322908  | 1.927100  | 1.826855  |          |
| H      | -5.934715 | -2.776843 | 0.053522  | H      | -1.846759 | 4.232728  | -0.544536  | H         | -0.268187 | 1.182795  | 1.940988  |          |
| H      | -7.745442 | -0.777537 | -1.12289  | H      | -0.202891 | 4.288303  | -0.463632  | C         | 1.178193  | 0.034834  | 0.867518  |          |
| H      | -7.871069 | -1.784518 | -0.582301 | N      | 0.902404  | 0.780539  | -0.241764  | C         | 0.629122  | -1.216040 | 1.009446  |          |
| O      | -2.367429 | 0.661802  | 2.379986  | C      | 0.218046  | 0.055328  | -0.429330  | C         | 2.478277  | -0.160782 | 0.280315  |          |
| C      | -2.651804 | -0.076330 | 3.569133  | H      | 2.262723  | 0.384639  | 0.017023   | H         | -0.343887 | -1.491656 | 1.394572  |          |
| H      | -3.620610 | 0.282428  | 3.913981  | H      | 2.943153  | 1.116498  | -0.430596  | N         | 1.507301  | -2.167443 | 0.544757  |          |
| H      | -2.694555 | -1.146516 | 3.353886  | C      | 2.521910  | 0.354644  | 1.534046   | C         | 2.650251  | -1.554639 | 0.093812  |          |
| H      | -1.883527 | 0.104486  | 4.324537  | C      | 2.486578  | -0.971702 | -0.624572  | C         | 3.513704  | 0.708725  | -0.092463 |          |
|        |           |           |           | H      | 2.287620  | 1.357713  | 1.894980   | H         | 1.341814  | -3.158468 | 0.554244  |          |

|        |           |           |           |        |           |           |           |        |           |           |           |
|--------|-----------|-----------|-----------|--------|-----------|-----------|-----------|--------|-----------|-----------|-----------|
| C      | 3.814308  | -2.094474 | -0.455396 | H      | -2.675383 | 2.126714  | -1.812931 | C      | -3.418246 | -1.058243 | -1.038254 |
| C      | 4.670755  | 0.177057  | -0.637538 | H      | -1.177180 | 1.538064  | -2.491255 | O      | -1.427382 | -0.384834 | 1.895838  |
| H      | 3.409669  | 1.781296  | 0.049563  | C      | -2.134522 | 0.188870  | -1.126204 | N      | -3.850748 | -2.328442 | -1.344085 |
| H      | 3.932736  | -3.165756 | -0.592061 | C      | -1.685597 | -0.996908 | -1.653122 | C      | -4.572932 | -0.364653 | -0.765098 |
| C      | 4.817837  | -1.209919 | -0.818215 | C      | -3.061111 | -0.167733 | -0.081752 | H      | -3.263199 | -3.107361 | -1.593305 |
| H      | 5.480790  | 0.838593  | -0.929885 | H      | -0.970579 | -1.168137 | -2.445663 | C      | -5.207476 | -2.339089 | -1.243962 |
| H      | 5.737279  | -1.596388 | -1.248019 | N      | -2.268675 | -2.056377 | -1.002180 | N      | -5.677315 | -1.168332 | -0.893451 |
| O      | -2.190250 | 2.665280  | -0.262425 | C      | -3.112077 | -1.583613 | -0.029217 | H      | -4.664254 | 0.671955  | -0.472450 |
| H      | -0.074599 | 4.226075  | -0.277233 | C      | -3.864254 | 0.569203  | 0.801578  | H      | -5.794280 | -3.227434 | -1.435432 |
| H      | -0.511628 | 3.802680  | 1.200283  | H      | -2.049631 | -3.022854 | -1.168278 | O      | -2.959614 | 1.232552  | 1.587189  |
| N      | -1.376577 | 0.622973  | -0.930036 | C      | -3.918695 | -2.269044 | 0.880480  | C      | -3.346420 | 1.088111  | 2.955341  |
| H      | -0.621883 | -0.028797 | -0.755192 | C      | -4.668421 | -0.106139 | 1.704580  | H      | -4.122149 | 1.833733  | 3.122735  |
| C      | -2.666405 | 0.106471  | -1.273419 | H      | -3.861262 | 1.655603  | 0.774942  | H      | -3.735024 | 0.083155  | 3.135058  |
| C      | -3.226751 | -0.841786 | -0.231437 | H      | -3.943494 | -3.354765 | 0.908394  | H      | -2.493396 | 1.264762  | 3.614497  |
| H      | -3.347202 | 0.957598  | -1.371124 | C      | -4.691861 | -1.511519 | 1.745692  |        |           |           |           |
| H      | -2.652039 | -0.414955 | -2.238032 | H      | -5.293680 | 0.455177  | 2.392516  | 372    |           |           |           |
| O      | -2.661664 | -1.205200 | 0.773634  | H      | -5.331151 | -2.013005 | 2.466228  | TrpLeu |           |           |           |
| O      | -4.451458 | -1.246487 | -0.586688 | O      | 1.301854  | 2.974304  | -0.123558 | N      | -1.153633 | 3.790313  | -0.924240 |
| C      | -5.082116 | -2.147285 | 0.323291  | H      | -1.903517 | 4.270399  | -0.556329 | C      | -1.092301 | 2.401027  | -0.511045 |
| H      | -5.183797 | -1.688230 | 1.309439  | H      | -0.257328 | 4.301212  | -0.559291 | H      | -1.528200 | 2.221586  | 0.489906  |
| H      | -6.062159 | -2.360565 | -0.101792 | N      | 0.814038  | 0.787313  | -0.520241 | C      | -1.870943 | 1.530714  | -1.524117 |
| H      | -4.499629 | -3.066796 | 0.421427  | H      | 0.114964  | 0.080496  | -0.598748 | C      | 0.391501  | 2.041069  | -0.355937 |
|        |           |           |           | C      | 2.179677  | 0.368084  | -0.200632 | H      | -2.776020 | 2.099502  | -1.770993 |
| 369    |           |           |           | H      | 2.835573  | 1.144817  | -0.608334 | H      | -1.294390 | 1.475055  | -2.453627 |
| TrpGln |           |           |           | C      | 2.519543  | 0.211581  | 1.307690  | C      | -2.264286 | 0.162641  | -1.061593 |
| N      | -1.490473 | 3.747456  | -1.054198 | C      | 2.386174  | -0.912026 | -0.984302 | C      | -1.823096 | -1.039659 | -1.556898 |
| C      | -1.357799 | 2.369074  | -0.620861 | H      | 2.195111  | 1.170045  | 1.734891  | C      | -3.210774 | -0.160080 | -0.024183 |
| H      | -1.650516 | 2.210386  | 0.434034  | C      | 1.710061  | -0.909293 | 1.952982  | H      | -1.098651 | -1.236908 | -2.334695 |
| C      | -2.256269 | 1.466308  | -1.497411 | C      | 4.025361  | 0.084992  | 1.558435  | N      | -2.430470 | -2.077624 | -0.893473 |
| C      | 0.135932  | 2.024922  | -0.664076 | O      | 1.498056  | -1.661805 | -1.328480 | C      | -3.282191 | -1.573671 | 0.056324  |
| H      | -3.186703 | 2.028048  | -1.646591 | H      | 2.033242  | -1.894524 | 1.595910  | C      | -4.014722 | 0.605909  | 0.833166  |
| H      | -1.803030 | 1.376986  | -2.490495 | H      | 1.820988  | -0.898699 | 3.040503  | H      | -2.223973 | -3.050299 | -1.038128 |
| C      | -2.584429 | 0.117356  | -0.938555 | H      | 0.643242  | -0.805509 | 1.733417  | C      | -4.110790 | -2.229151 | 0.968245  |
| C      | -2.204891 | -1.105818 | -1.433581 | H      | 4.382249  | -0.886577 | 1.195824  | C      | -4.840392 | -0.039628 | 1.738562  |
| C      | -3.396582 | -0.158503 | 0.219014  | H      | 4.546646  | 0.841270  | 0.957855  | H      | -3.994867 | 1.691431  | 0.784997  |
| H      | -1.580971 | -1.338191 | -2.285323 | C      | 4.412887  | 0.260538  | 3.022304  | H      | -4.151347 | -3.313644 | 1.017826  |
| N      | -2.725477 | -2.113004 | -0.657660 | H      | 3.988997  | -0.524669 | 3.655820  | C      | -4.884654 | -1.443437 | 1.807356  |
| C      | -3.455306 | -1.566807 | 0.367484  | H      | 5.499750  | 0.226109  | 3.144484  | H      | -5.466489 | 0.544206  | 2.406726  |
| C      | -4.090699 | 0.646713  | 1.133999  | H      | 4.066152  | 1.224781  | 3.409891  | H      | -5.540800 | -1.921242 | 2.528841  |
| H      | -2.536473 | -3.091668 | -0.784876 | O      | 3.678650  | -1.136037 | -1.240055 | O      | 1.238654  | 2.912790  | -0.187114 |
| C      | -4.164814 | -2.179543 | 1.401604  | C      | 3.957461  | -2.348966 | -1.940168 | H      | -1.958656 | 4.247597  | -0.514066 |
| C      | -4.798006 | 0.043785  | 2.160806  | H      | 5.039711  | -2.378962 | -2.059402 | H      | -0.313278 | 4.251330  | -0.584101 |
| H      | -4.079097 | 1.729048  | 1.036728  | H      | 3.609808  | -3.213152 | -1.368991 | N      | 0.704618  | 0.726475  | -0.375438 |
| H      | -4.196275 | -3.260661 | 1.503180  | H      | 3.464207  | -2.349782 | -2.915007 | H      | -0.018628 | 0.025555  | -0.489489 |
| C      | -4.830657 | -1.355583 | 2.294824  |        |           |           |           | C      | 2.065051  | 0.283569  | -0.184628 |
| H      | -5.338006 | 0.657881  | 2.875318  | 371    |           |           |           | H      | 2.725716  | 1.056230  | -0.587452 |
| H      | -5.391407 | -1.799639 | 3.111965  | TrpHis |           |           |           | C      | 2.375681  | 0.082668  | 1.313343  |
| O      | 0.990063  | 2.906667  | -0.635781 | N      | 1.975239  | 3.689124  | -1.196699 | C      | 2.251195  | -0.997482 | -0.970955 |
| H      | -2.240076 | 4.206267  | -0.551122 | C      | 1.714211  | 2.299271  | -0.877816 | H      | 2.127357  | 1.037651  | 1.793142  |
| H      | -0.618950 | 4.225224  | -0.838831 | H      | 2.119569  | 1.596457  | -1.627886 | H      | 1.672855  | -0.663854 | 1.705616  |
| N      | 0.463880  | 0.714337  | -0.697176 | C      | 2.362627  | 1.954593  | 0.487692  | C      | 3.808880  | -0.306021 | 1.689276  |
| H      | -0.252929 | -0.002236 | -0.705873 | C      | 0.193363  | 2.091509  | -0.910540 | O      | 1.362662  | -1.774988 | -1.243155 |
| C      | 1.847565  | 0.310388  | -0.712504 | H      | 3.339871  | 2.451757  | 0.480278  | H      | 4.042971  | -1.273846 | 1.224904  |
| H      | 2.407404  | 1.055611  | -1.289256 | H      | 1.787736  | 2.447078  | 1.279433  | C      | 4.833794  | 0.713234  | 1.195928  |
| C      | 2.438451  | 0.247264  | 0.711691  | C      | 2.553776  | 0.502091  | 0.796273  | C      | 3.902582  | -0.477622 | 3.204531  |
| C      | 1.932266  | -1.027418 | -1.419679 | C      | 1.922497  | -0.233326 | 1.770589  | H      | 4.592989  | 1.717717  | 1.563359  |
| H      | 2.062442  | 1.133841  | 1.231109  | C      | 3.469544  | -0.402500 | 0.148648  | H      | 5.836508  | 0.458192  | 1.554449  |
| H      | 2.054733  | -0.625890 | 1.248904  | H      | 1.153709  | 0.066808  | 2.469529  | H      | 4.876568  | 0.752747  | 0.104007  |
| C      | 3.959884  | 0.245198  | 0.767179  | N      | 2.385534  | -1.526526 | 1.761646  | H      | 3.185943  | -1.220297 | 3.571262  |
| O      | 0.996111  | -1.772458 | -1.605273 | C      | 3.332934  | -1.664785 | 0.778986  | H      | 4.904976  | -0.801080 | 3.503095  |
| H      | 4.366155  | -0.547645 | 0.128128  | C      | 4.400382  | -0.264037 | -0.891574 | H      | 3.692781  | 0.468927  | 3.716503  |
| H      | 4.357187  | 1.191865  | 0.381289  | C      | 2.052710  | -2.259343 | 2.363453  | O      | 3.529960  | -1.189378 | -1.311364 |
| C      | 4.456907  | -0.025777 | 2.177842  | H      | 4.082122  | -2.777406 | 0.392789  | C      | 3.797092  | -2.406289 | -2.009753 |
| O      | 3.879758  | -0.780870 | 2.941833  | C      | 5.147202  | -1.364518 | -1.277789 | H      | 4.870494  | -2.411480 | -2.194275 |
| N      | 5.618958  | 0.596310  | 2.511590  | H      | 4.539118  | 0.694859  | -1.383717 | H      | 3.506568  | -3.269184 | -1.405783 |
| H      | 5.980684  | 0.451645  | 3.440050  | C      | 3.964802  | -3.737898 | 0.886629  | H      | 3.246007  | -2.434169 | -2.952648 |
| H      | 6.046055  | 1.289562  | 1.923247  | H      | 4.986836  | -2.609276 | -0.643265 |        |           |           |           |
| O      | 3.183764  | -1.308589 | -1.801192 | H      | 5.871247  | -1.268241 | -2.081332 | 373    |           |           |           |
| C      | 3.353835  | -2.581807 | -2.428027 | H      | 5.586775  | -3.454118 | -0.968268 | TrpLys |           |           |           |
| H      | 4.413230  | -2.651842 | -2.671198 | O      | -0.555133 | 2.922086  | -1.407828 | N      | 1.865273  | 3.322243  | -2.006407 |
| H      | 3.061168  | -3.386121 | -1.749215 | H      | 2.770770  | 3.772400  | -1.816678 | C      | 1.650159  | 2.063025  | -1.318908 |
| H      | 2.747268  | -2.644683 | -3.334268 | H      | 1.155806  | 4.060507  | -1.671072 | H      | 1.841741  | 1.178398  | -1.594705 |
|        |           |           |           | N      | -0.250053 | 0.916847  | -0.393623 | C      | 2.596729  | 1.976915  | -0.099292 |
| 370    |           |           |           | H      | 0.412631  | 0.307065  | 0.073220  | C      | 0.155190  | 1.980981  | -0.981656 |
| TrpIle |           |           |           | C      | -1.655106 | 0.599433  | -0.294451 | H      | 3.558829  | 2.378238  | -0.441099 |
| N      | -1.075231 | 3.830201  | -0.938202 | H      | -2.203530 | 1.452769  | -0.699195 | H      | 2.242330  | 2.673429  | 0.668084  |
| C      | -1.008012 | 2.438318  | -0.534217 | C      | -1.974990 | -0.680407 | -1.075473 | C      | 2.813342  | 0.614095  | 0.480787  |
| H      | -1.458531 | 2.247346  | 0.458279  | C      | -1.994393 | 0.411397  | 1.178724  | C      | 2.440948  | 0.172663  | 1.726395  |
| C      | -1.762435 | 1.570325  | -1.565978 | H      | -1.631037 | -0.525230 | -2.106137 | C      | 3.488179  | -0.494100 | -0.145883 |
| C      | 0.476105  | 2.094820  | -0.349987 | H      | -1.365036 | -1.489810 | -0.652395 | H      | 1.901427  | 0.692725  | 2.505558  |

|        |           |           |           |        |           |           |           |        |           |           |           |
|--------|-----------|-----------|-----------|--------|-----------|-----------|-----------|--------|-----------|-----------|-----------|
| N      | 2.838307  | -1.129723 | 1.907002  | S      | 4.318887  | -0.183748 | 2.473584  | H      | -5.436556 | 0.446196  | 1.679521  |
| C      | 3.476637  | -1.571123 | 0.775788  | C      | 6.105434  | -0.299712 | 2.226750  | H      | -5.466032 | -2.020338 | 1.800875  |
| C      | 4.113214  | -0.675610 | -1.388466 | H      | 6.506332  | 0.616985  | 1.785243  | O      | 1.596088  | 2.972239  | 0.398278  |
| H      | 2.620351  | -1.689166 | 2.712707  | H      | 6.558103  | -0.439181 | 3.210805  | H      | -1.513756 | 4.247692  | -0.491603 |
| C      | 4.050210  | -2.809703 | 0.484064  | H      | 6.367611  | -1.155297 | 1.597823  | H      | 0.119214  | 4.280314  | -0.280361 |
| C      | 4.685703  | -1.902112 | -1.682194 | O      | 3.038822  | -0.976370 | -2.071754 | N      | 1.128211  | 0.772377  | 0.155915  |
| H      | 4.153385  | 0.136160  | -2.109859 | C      | 3.223289  | -2.147847 | -2.869048 | H      | 0.445646  | 0.067932  | -0.101551 |
| H      | 4.030374  | -3.625348 | 1.201383  | H      | 4.268933  | -2.135896 | -3.173666 | C      | 2.439586  | 0.331764  | 0.558017  |
| C      | 4.650699  | -2.959432 | -0.755858 | H      | 3.001464  | -3.047049 | -2.289505 | H      | 3.151333  | 1.142362  | 0.387898  |
| H      | 5.171735  | -2.053150 | -2.641483 | H      | 2.569192  | -2.120912 | -3.743556 | C      | 2.443337  | -0.032751 | 2.045737  |
| H      | 5.106561  | -3.910422 | -1.015075 |        |           |           |           | C      | 2.818207  | -0.882301 | -0.269655 |
| O      | -0.668495 | 2.656310  | -1.591068 | 375    |           |           |           | H      | 2.191778  | 0.880535  | 2.603599  |
| H      | 2.566865  | 3.217369  | -2.728950 | TrpPro |           |           |           | H      | 1.647053  | -0.773878 | 2.218625  |
| H      | 0.987585  | 3.587797  | -2.446543 | N      | 1.555787  | -1.661951 | -2.566595 | O      | 3.715900  | -0.535763 | 2.373797  |
| N      | -0.204585 | 1.107238  | -0.015337 | C      | 0.642168  | -1.201500 | -1.532404 | O      | 2.031651  | -1.750666 | -0.583817 |
| H      | 0.493095  | 0.543045  | 0.456227  | H      | 0.663456  | -0.107699 | -1.529517 | H      | 3.726509  | -0.732922 | 3.314477  |
| C      | -1.591548 | 0.921260  | 0.336791  | C      | -0.789456 | -1.652080 | -1.858628 | O      | 4.107639  | -0.887471 | -0.593892 |
| H      | -2.107469 | 1.877254  | 0.201252  | C      | 1.014210  | -1.775968 | -0.162754 | C      | 4.550728  | -2.044116 | -1.302703 |
| C      | -2.265128 | -0.130428 | -0.567706 | H      | -1.029993 | -1.285073 | -2.862460 | H      | 5.614347  | -1.891872 | -1.480705 |
| C      | -1.648487 | 0.525314  | 1.797824  | H      | -0.789298 | -2.746528 | -1.901087 | H      | 4.386930  | -2.943788 | -0.704837 |
| H      | -2.058163 | 0.193314  | -1.593932 | C      | -1.788799 | -1.185690 | -0.849934 | H      | 4.013552  | -2.144736 | -2.248970 |
| H      | -1.753258 | -1.091201 | -0.425647 | C      | -2.348520 | -1.936499 | 0.149085  |        |           |           |           |
| C      | -3.769560 | -0.292874 | -0.382473 | C      | -2.296667 | 0.149591  | -0.676621 | 377    |           |           |           |
| O      | -0.758641 | -0.043830 | 2.391848  | H      | -2.201817 | -2.984250 | 0.372487  | TrpTyr |           |           |           |
| H      | -3.993091 | -0.649424 | 0.630645  | N      | -3.172042 | -1.155194 | 0.927211  | N      | 2.585511  | 3.848506  | -0.033839 |
| H      | -4.252820 | 0.689823  | -0.469320 | C      | -3.165817 | 0.129078  | 0.444962  | C      | 2.298151  | 2.428266  | -0.100522 |
| C      | -4.375279 | -1.248214 | -1.405129 | C      | -2.107324 | 1.360003  | -1.361512 | H      | 2.577074  | 1.969165  | -1.067884 |
| H      | -4.187845 | -0.887477 | -2.423560 | H      | -3.726354 | -1.485523 | 1.697297  | C      | 3.082487  | 1.692471  | 1.010781  |
| H      | -3.878219 | -2.226840 | -1.329230 | C      | -3.839292 | 1.268354  | 0.888014  | C      | 0.773676  | 2.271721  | -0.025526 |
| C      | -5.875398 | -1.437300 | -1.230227 | C      | -2.770854 | 2.494481  | -0.922131 | H      | 4.075923  | 2.157353  | 1.032221  |
| H      | -6.075715 | -1.772616 | -0.195058 | H      | -1.456856 | 1.403895  | -2.231336 | H      | 2.624706  | 1.929205  | 1.977117  |
| H      | -6.371425 | -0.464182 | -1.338008 | H      | -4.505097 | 1.234335  | 1.746054  | C      | 3.238243  | 0.212946  | 0.844118  |
| N      | -6.402794 | -2.323385 | -2.258538 | C      | -3.628247 | 2.448316  | 0.191552  | C      | 2.702562  | -0.775434 | 1.633025  |
| H      | -6.030205 | -3.258985 | -2.126622 | H      | -2.633020 | 3.435277  | -1.446905 | C      | 4.006753  | -0.463732 | -0.169308 |
| H      | -7.409963 | -2.404088 | -2.167047 | H      | -4.137197 | 3.353098  | 0.510656  | H      | 2.056216  | -0.691045 | 2.495682  |
| O      | -2.816694 | 0.855137  | 2.357287  | O      | 1.030133  | -2.993556 | -0.004985 | N      | 3.087114  | -2.010992 | 1.172507  |
| C      | -2.967694 | 0.462894  | 3.722023  | H      | 2.472820  | -1.264072 | -2.377326 | C      | 3.880946  | -1.856172 | 0.064609  |
| H      | -3.963405 | 0.792542  | 0.015725  | H      | 1.657120  | -2.668317 | -2.448968 | C      | 4.799770  | -0.027780 | -1.241011 |
| H      | -2.875850 | -0.621119 | 3.823871  | N      | 1.312070  | -0.930326 | 0.858788  | H      | 2.765408  | -2.886925 | 1.545347  |
| H      | -2.207110 | 0.940876  | 4.343828  | C      | 1.552347  | -1.450985 | 2.198470  | C      | 4.503997  | -2.808239 | -0.744003 |
|        |           |           |           | C      | 1.372971  | 0.518316  | 0.809288  | C      | 5.422115  | -0.968276 | -2.044900 |
| 374    |           |           |           | H      | 2.606870  | -1.732722 | 2.324754  | H      | 4.929612  | -1.033465 | -0.455520 |
| TrpMet |           |           |           | H      | 0.948216  | -2.347739 | 2.348024  | H      | 4.394878  | -3.871948 | -0.552233 |
| N      | -1.683859 | 3.838137  | -0.671224 | C      | 1.176152  | -0.271097 | 3.085026  | C      | 5.271747  | -2.344902 | -1.800388 |
| C      | -1.520384 | 2.428228  | -0.371403 | C      | 1.663164  | 0.926990  | 2.272746  | H      | 6.038118  | -0.641519 | -2.877374 |
| H      | -1.779865 | 2.167981  | 0.672240  | H      | 0.419449  | 0.951319  | 0.479420  | H      | 5.770344  | -3.058899 | -2.449211 |
| C      | -2.432611 | 1.597738  | -1.302563 | C      | 2.465126  | 1.029417  | -0.116766 | O      | 0.025992  | 3.197521  | -0.323713 |
| C      | -0.023519 | 2.114576  | -0.482392 | H      | 1.629383  | -0.320199 | 4.078534  | H      | 3.384377  | 4.076695  | -0.612780 |
| H      | -3.381785 | 2.145546  | -1.354927 | H      | 0.087933  | -0.230364 | 3.205032  | H      | 1.774843  | 4.345706  | -0.394374 |
| H      | -2.018468 | 1.627556  | -2.316077 | H      | 2.742100  | 1.057316  | 2.414193  | N      | 0.306537  | 1.059515  | 0.350140  |
| C      | -2.703940 | 0.187039  | -0.881888 | H      | 1.178659  | 1.870876  | 2.528643  | H      | 0.948622  | 0.295774  | 0.530190  |
| C      | -2.330486 | -0.960354 | -1.537273 | O      | 3.262929  | 0.352453  | -0.720995 | C      | -1.107461 | 0.783297  | 0.388055  |
| C      | -3.441637 | -0.242211 | 0.279001  | O      | 2.430345  | 2.367051  | -0.167402 | H      | -1.632723 | 1.704982  | 0.650413  |
| H      | -1.754078 | -1.075283 | -2.444613 | C      | 3.420402  | 2.967645  | -1.003369 | C      | -1.618360 | 0.286648  | -0.987265 |
| N      | -2.784739 | -2.063961 | -0.857397 | H      | 3.315424  | 2.618333  | -2.033276 | C      | -1.354688 | -0.266889 | 1.450862  |
| C      | -3.463859 | -1.659496 | 0.263855  | H      | 3.246607  | 4.041366  | -0.943849 | H      | -1.371964 | 1.081539  | -1.699062 |
| C      | -4.096434 | 0.431726  | 1.320634  | H      | 4.424249  | 2.721152  | -0.649287 | H      | -1.030777 | -0.595982 | -1.263646 |
| H      | -2.586857 | -3.016054 | -1.110415 |        |           |           |           | C      | -3.088267 | -0.027708 | -1.028448 |
| C      | -4.098659 | -2.407317 | 1.256766  | 376    |           |           |           | O      | -0.602446 | -1.190379 | 1.680492  |
| C      | -4.729597 | -0.305496 | 2.307341  | TrpSer |           |           |           | C      | -3.546473 | -1.343501 | -0.962809 |
| H      | -4.111966 | 1.517870  | 1.351789  | N      | -0.642887 | 3.804915  | -0.757380 | C      | -4.041042 | 0.994270  | -1.107634 |
| H      | -4.103070 | -3.493356 | 1.231251  | C      | -0.628663 | 2.415967  | -0.340293 | C      | -2.827650 | -2.158035 | -0.906971 |
| C      | -4.726823 | -1.711323 | 2.277086  | H      | -1.244053 | 2.221618  | 0.558154  | H      | -4.906634 | -1.638487 | -0.974955 |
| H      | -5.238424 | 0.206719  | 3.118490  | C      | -1.178106 | 1.530669  | -1.484007 | C      | -5.399988 | 0.717991  | -1.119739 |
| H      | -5.229730 | -2.262360 | 3.066242  | C      | 0.806468  | 2.086402  | 0.092902  | H      | -3.709058 | 2.028386  | -1.165884 |
| O      | 0.818124  | 3.001545  | -0.380632 | H      | -2.032846 | 2.078700  | -1.899231 | H      | -5.241004 | -2.673440 | -0.931740 |
| H      | -2.431380 | 4.234309  | -0.114645 | H      | -0.433486 | 1.494010  | -2.286387 | C      | -5.839769 | -0.605485 | -1.052794 |
| H      | -0.816527 | 4.309475  | -0.426793 | C      | -1.617721 | 0.150778  | -1.104703 | H      | -6.137090 | 1.511544  | -1.186555 |
| N      | 0.320018  | 0.817594  | -0.653561 | C      | -1.056751 | -1.039369 | -1.499019 | O      | -7.180143 | -0.822819 | -1.071640 |
| H      | -0.389963 | 0.097138  | -0.722406 | C      | -2.737805 | -0.198171 | -0.268268 | H      | -7.343650 | -1.770653 | -1.037190 |
| C      | 1.706132  | 0.429047  | -0.717369 | H      | -0.190162 | -1.218020 | -2.120300 | O      | -2.514083 | -0.074243 | 2.076872  |
| H      | 2.265769  | 1.246019  | -1.185396 | N      | -1.753606 | -2.093450 | -0.960960 | C      | -2.877593 | -1.086161 | 3.015331  |
| C      | 2.282330  | 0.187962  | 0.694924  | C      | -2.785383 | -1.613083 | -0.195206 | H      | -2.996801 | -2.047744 | 2.510164  |
| C      | 1.803444  | -0.807329 | -1.588886 | C      | -3.711617 | 0.546318  | 0.413688  | H      | -2.114696 | -1.183715 | 3.791232  |
| H      | 1.988690  | 1.060643  | 1.286852  | H      | -1.491490 | -3.059296 | -1.052265 | H      | -3.824419 | -0.762820 | 3.445440  |
| H      | 1.791642  | -0.687460 | 1.137016  | C      | -3.755955 | -2.290223 | 0.544958  |        |           |           |           |
| C      | 3.796302  | 0.037035  | 0.746264  | C      | -4.678090 | -0.120757 | 1.147961  | 378    |           |           |           |
| O      | 0.888060  | -1.568435 | -1.810632 | H      | -3.712600 | 1.631848  | 0.362535  | TrpThr |           |           |           |
| H      | 4.132946  | -0.821808 | 0.158099  | H      | -3.776385 | -3.375354 | 0.592153  | N      | -0.562161 | 3.836336  | 0.095414  |
| H      | 4.275383  | 0.934481  | 0.337421  | C      | -4.696777 | -1.525228 | 1.215660  | C      | -0.481185 | 2.389891  | 0.167602  |

|        |           |           |           |        |           |           |           |        |           |           |           |
|--------|-----------|-----------|-----------|--------|-----------|-----------|-----------|--------|-----------|-----------|-----------|
| H      | -1.133288 | 2.049341  | 0.982641  | C      | 3.464783  | -1.691126 | 1.601848  | H      | -4.679426 | -1.402880 | 1.274754  |
| C      | -1.007932 | 1.773487  | -1.152062 | C      | 3.964853  | 1.602676  | 0.148436  | H      | -3.186966 | 2.441492  | -0.048762 |
| C      | 0.946153  | 1.906472  | 0.457554  | C      | 3.933772  | 0.316233  | 0.707955  | H      | -3.991083 | 2.274915  | 1.514072  |
| H      | -1.796321 | 2.452623  | -1.496685 | H      | 3.012804  | -2.585228 | 2.009815  | H      | -2.364241 | 1.629448  | 1.293758  |
| H      | -0.213150 | 1.797833  | -1.906611 | N      | 4.833391  | -1.568300 | 1.532436  | O      | -1.466621 | -1.674759 | 0.181690  |
| C      | -1.556741 | 0.388012  | -1.033359 | C      | 5.152443  | -0.346656 | 0.991715  | H      | -3.613524 | -2.185584 | -0.617389 |
| C      | -0.989176 | -0.777725 | -1.484934 | C      | 5.196186  | 2.181881  | -0.112053 | H      | -3.510389 | -1.688224 | -2.149161 |
| C      | -2.811213 | 0.017355  | -0.431886 | H      | 3.039155  | 2.130167  | -0.071727 | C      | -1.727929 | -0.595955 | -0.342631 |
| H      | -0.034527 | -0.920706 | -1.973527 | H      | 5.494144  | -2.247559 | 1.865656  | N      | -0.772984 | 0.336292  | -0.577922 |
| N      | -1.815276 | -1.840023 | -1.204325 | C      | 6.393707  | 0.236151  | 0.731150  | H      | -1.005024 | 1.250677  | -0.942793 |
| C      | -2.938135 | -1.388893 | -0.556619 | C      | 6.395793  | 1.505973  | 0.175099  | C      | 0.582282  | 0.169970  | -0.118042 |
| C      | -3.839593 | 0.740062  | 0.189989  | H      | 5.239454  | 3.176990  | -0.544819 | H      | 0.586622  | -0.177295 | 0.922561  |
| H      | -1.607338 | -2.800375 | -1.413383 | H      | 7.322288  | -0.281716 | 0.955028  | C      | 1.343720  | -0.874107 | -0.957546 |
| C      | -4.050032 | -2.081529 | -0.075016 | H      | 7.344297  | 1.989175  | -0.040977 | C      | 1.242410  | 1.535189  | -0.183870 |
| C      | -4.944801 | 0.056220  | 0.669779  | O      | 1.924096  | -2.064381 | -1.474845 | C      | 0.727355  | -1.779394 | -0.935202 |
| H      | -3.770053 | 1.820229  | 0.289361  | C      | 1.896077  | -3.395513 | -1.986728 | H      | 1.449480  | -0.542302 | -1.992484 |
| H      | -4.134502 | -3.159797 | -0.178949 | H      | 1.519708  | -4.091282 | -1.232726 | C      | 2.713259  | -1.227338 | -0.435076 |
| C      | -5.047285 | -1.340283 | 0.539701  | H      | 1.255322  | -3.454214 | -2.869976 | O      | 0.706014  | 2.529497  | -0.619616 |
| H      | -5.748363 | 0.604114  | 1.153052  | H      | 2.926830  | -3.632772 | -2.246571 | O      | 3.721778  | -1.264313 | -1.097557 |
| H      | -5.926451 | -1.848247 | 0.925255  |        |           |           |           | O      | 2.489866  | 1.497815  | 0.278667  |
| O      | 1.896564  | 2.677125  | 0.465827  | 380    |           |           |           | C      | 3.212168  | 2.729216  | 0.193226  |
| H      | -0.234382 | 4.217504  | 0.979033  | TrpVal |           |           |           | H      | 4.207154  | 2.513124  | 0.578861  |
| H      | 0.141087  | 4.147282  | -0.572335 | N      | -0.832575 | 3.871042  | -0.743442 | H      | 3.267354  | 3.066908  | -0.843822 |
| N      | 1.083734  | 0.575027  | 0.714467  | C      | -0.786823 | 2.464949  | -0.389300 | H      | 2.723371  | 3.499359  | 0.794032  |
| H      | 0.317711  | -0.042398 | 0.471090  | H      | -1.328409 | 2.230196  | 0.546500  | O      | 2.666939  | -1.540896 | 0.869815  |
| C      | 2.390305  | -0.012450 | 0.772230  | C      | -1.428478 | 1.632607  | -1.522145 | C      | 3.922085  | -1.887313 | 1.448431  |
| H      | 3.076071  | 0.738425  | 1.178605  | C      | 0.676419  | 2.125532  | -0.076656 | H      | 4.622123  | -1.051099 | 1.374244  |
| C      | 2.397351  | -1.248852 | 1.674654  | H      | -2.323116 | 2.188630  | -1.829393 | H      | 3.714608  | -2.120144 | 2.492437  |
| C      | 2.899634  | -0.364715 | -0.624745 | H      | -0.759342 | 1.647626  | -2.389149 | H      | 4.355527  | -2.752874 | 0.941639  |
| H      | 3.413815  | -1.667938 | 1.646310  | C      | -1.817932 | 0.229173  | -1.177126 |        |           |           |           |
| C      | 2.018960  | -0.919689 | 3.108002  | C      | -1.303175 | -0.927602 | -1.707985 | 382    |           |           |           |
| O      | 1.476241  | -2.151043 | 1.078133  | C      | -2.831520 | -0.182847 | -0.239172 | ValGlu |           |           |           |
| O      | 2.271331  | -0.267244 | -1.651146 | H      | -0.514444 | -1.056119 | -2.435936 | N      | -3.255615 | -2.631956 | -0.701920 |
| H      | 1.029229  | -0.457977 | 3.146246  | N      | -1.928501 | -2.020821 | -1.160103 | C      | -3.025199 | -1.195669 | -0.716492 |
| H      | 2.007093  | -1.829309 | 3.719420  | C      | -2.864393 | -1.600171 | -0.249658 | H      | -2.960145 | -0.867043 | -1.762597 |
| H      | 2.742497  | -0.231609 | 3.555341  | C      | -3.722399 | 0.506394  | 0.597083  | C      | -4.234517 | -0.464706 | -0.085504 |
| H      | 1.346024  | -2.887223 | 1.683661  | H      | -1.673861 | -2.976259 | -1.338977 | H      | -5.089938 | -0.817647 | -0.675899 |
| O      | 4.168115  | -0.791979 | -0.567890 | C      | -3.737798 | -2.333123 | 0.555469  | C      | -4.471317 | -0.875158 | 1.365682  |
| C      | 4.745108  | -1.141415 | -1.825473 | C      | -4.592338 | -0.216167 | 1.396725  | C      | -4.146167 | 1.052515  | -0.226540 |
| H      | 5.765971  | -1.453811 | -1.608019 | H      | -3.735177 | 1.592877  | 0.614618  | H      | -3.620266 | -0.615861 | 2.003790  |
| H      | 4.185785  | -1.956210 | -2.291664 | C      | -3.747301 | -3.419278 | 0.536958  | H      | -5.359091 | -0.371150 | 1.761153  |
| H      | 4.742493  | -0.281702 | -2.499640 | H      | -4.596365 | -1.622181 | 1.378639  | H      | -4.640097 | -1.952541 | 1.447035  |
|        |           |           |           | H      | -5.285316 | 0.307924  | 2.048168  | H      | -3.987862 | 1.357747  | -1.267874 |
| 379    |           |           |           | H      | -5.288593 | -2.161366 | 2.018540  | H      | -5.075599 | 1.520438  | 0.112692  |
| TrpTrp |           |           |           | O      | 1.471503  | 3.003671  | 0.245129  | H      | -3.331618 | 1.472013  | 0.373627  |
| N      | -1.791789 | 3.761919  | -0.989909 | H      | -1.694180 | 4.291228  | -0.417021 | O      | -1.306693 | -1.497424 | 0.948483  |
| C      | -1.914805 | 2.383825  | -0.554106 | H      | -0.053802 | 4.331842  | -0.279143 | H      | -2.966719 | -2.966927 | 0.215700  |
| H      | -2.275005 | 2.283143  | 0.487148  | N      | 1.027067  | 0.821253  | -0.124742 | H      | -2.616264 | -3.076244 | -1.354436 |
| C      | -2.918640 | 1.646247  | -1.469795 | H      | 0.356003  | 0.115423  | -0.405521 | C      | -1.713251 | -0.842801 | -0.006804 |
| C      | -0.502193 | 1.786543  | -0.532256 | C      | 2.370157  | 0.405936  | 0.198685  | N      | -1.027444 | 0.221763  | -0.488949 |
| H      | -3.741764 | 2.351978  | -1.636982 | H      | 3.058565  | 1.189572  | -0.135727 | H      | -1.395447 | 0.797187  | -1.234067 |
| H      | -2.453431 | 1.497263  | -2.450048 | C      | 2.565163  | 0.233901  | 1.730217  | C      | 0.173858  | 0.697588  | 0.153180  |
| C      | -3.474189 | 0.359792  | -0.944534 | C      | 2.658523  | -0.864446 | -0.574192 | H      | 0.052597  | 0.613385  | 1.240222  |
| C      | -3.279055 | -0.899324 | -1.455744 | H      | 2.197398  | 1.185177  | 2.134572  | C      | 1.394637  | -0.146546 | -0.265047 |
| C      | -4.349682 | 0.195357  | 0.188022  | C      | 1.711525  | -0.897927 | 2.292724  | C      | 0.321399  | 2.159631  | -0.222711 |
| H      | -2.677904 | -1.211940 | -2.298058 | C      | 4.030238  | 0.094637  | 2.129949  | H      | 1.094096  | -1.189525 | -0.139734 |
| N      | -3.972549 | -1.825186 | -0.715722 | O      | 1.812516  | -1.607661 | -1.022653 | H      | 1.587476  | 0.014262  | -1.332660 |
| C      | -4.632214 | -1.188899 | 0.304912  | H      | 2.054816  | -1.876562 | 1.936740  | C      | 2.654716  | 0.110513  | 0.557675  |
| C      | -4.932493 | 1.083155  | 1.104441  | H      | 1.765108  | -0.908856 | 3.385632  | O      | -0.269565 | 2.684766  | -1.140243 |
| H      | -3.921607 | -2.819735 | -0.849787 | H      | 0.659911  | -0.787355 | 2.011520  | H      | 3.001645  | 1.141372  | 0.478061  |
| C      | -5.455131 | -1.700777 | 1.309230  | H      | 4.635365  | 0.910996  | 1.722919  | H      | 2.437943  | -0.078091 | 1.617622  |
| C      | -5.751564 | 0.580493  | 2.101843  | H      | 4.123389  | 0.120407  | 3.220275  | C      | 3.816991  | -0.771618 | 1.73457   |
| H      | -4.748955 | 2.151803  | 1.030816  | H      | 4.460808  | -0.847767 | 1.778991  | O      | 4.954443  | -0.393008 | 0.023157  |
| H      | -5.659223 | -2.765053 | 1.385708  | O      | 3.971240  | -1.088977 | -0.689452 | O      | 1.190669  | 2.795895  | 0.564035  |
| C      | -6.006578 | -0.798500 | 2.204894  | C      | 4.323064  | -2.293152 | -1.371592 | C      | 1.409397  | 4.172090  | 0.239021  |
| H      | -6.207448 | 1.259151  | 2.816604  | H      | 5.411718  | -2.327932 | -1.366863 | H      | 2.140237  | 4.532168  | 0.961539  |
| H      | -6.651559 | -1.163240 | 2.998839  | H      | 3.908314  | -3.163440 | -0.857355 | H      | 1.793388  | 4.269021  | -0.778865 |
| O      | 0.487116  | 2.513605  | -0.472567 | H      | 3.944925  | -2.276615 | -2.396506 | H      | 0.476713  | 4.734467  | 0.321055  |
| H      | -2.469599 | 4.345816  | -0.515622 |        |           |           |           | O      | 3.443622  | -2.055644 | 0.037221  |
| H      | -0.859646 | 4.084303  | -0.742446 | 381    |           |           |           | C      | 4.498551  | -2.955372 | -0.295402 |
| N      | -0.404339 | 0.440290  | -0.540392 | ValAsp |           |           |           | H      | 4.037259  | -3.939619 | -0.371063 |
| H      | -1.234234 | -0.141938 | -0.562955 | N      | -3.869644 | -1.419556 | -1.237822 | H      | 4.961258  | -2.674169 | -1.244693 |
| C      | 0.883742  | -0.202541 | -0.472579 | C      | -3.155006 | -0.241193 | -0.772682 | H      | 5.267450  | -2.951368 | 0.481162  |
| H      | 1.598298  | 0.377672  | -1.063628 | H      | -3.106074 | 0.481398  | -1.598515 |        |           |           |           |
| C      | 1.410725  | -0.274917 | 0.987713  | C      | -3.945131 | 0.434566  | 0.373707  | 383    |           |           |           |
| C      | 0.748474  | -1.584836 | -1.071522 | H      | -4.930330 | 0.631866  | -0.068237 | ValAla |           |           |           |
| H      | 1.197269  | 0.710772  | 1.416015  | C      | -4.148781 | -0.493066 | 1.568798  | N      | -3.392612 | -1.162231 | -0.820817 |
| H      | 0.813537  | -1.005120 | 1.545755  | C      | -3.333688 | 1.765883  | 0.802432  | C      | -2.314822 | -0.186905 | -0.754193 |
| C      | 2.867775  | -0.563962 | 1.105629  | H      | -3.195143 | -0.786278 | 2.019292  | H      | -2.017359 | 0.069592  | -1.780006 |
| O      | -0.294519 | -2.200119 | -1.149010 | H      | -4.749147 | 0.005854  | 2.336433  | C      | -2.825783 | 1.114984  | -0.091382 |

|        |           |           |           |        |           |           |           |        |           |           |           |
|--------|-----------|-----------|-----------|--------|-----------|-----------|-----------|--------|-----------|-----------|-----------|
| H      | -3.689702 | 1.399596  | -0.705876 | C      | -2.866916 | -0.139467 | -0.839823 | C      | -3.941406 | 1.464113  | 0.727801  |
| C      | -3.323694 | 0.887405  | 1.333483  | H      | -2.730361 | 0.549632  | -1.684196 | H      | -3.341821 | -0.972772 | 2.035809  |
| C      | -1.800659 | 2.244419  | -0.148857 | C      | -3.651164 | 0.628610  | 0.251178  | H      | -5.005168 | -0.451595 | 2.358206  |
| H      | -2.521364 | 0.535505  | 1.989797  | H      | -4.602998 | 0.877078  | -0.235891 | H      | -4.706556 | -1.868698 | 1.348926  |
| H      | -3.720765 | 1.819219  | 1.749161  | C      | -3.962690 | -0.240334 | 1.467105  | H      | -3.929489 | 2.119669  | -0.151216 |
| H      | -4.128133 | 0.146987  | 1.354760  | C      | -2.965243 | 1.928919  | 0.662177  | H      | -4.665521 | 1.880089  | 1.435228  |
| H      | -1.442424 | 2.418845  | -1.170598 | H      | -3.048755 | -0.581960 | 1.963431  | H      | -2.954979 | 1.518652  | 1.200799  |
| H      | -2.244350 | 3.180115  | 0.205364  | H      | -4.553873 | 0.326021  | 2.194025  | O      | -1.540570 | -1.683302 | 0.170764  |
| H      | -0.928699 | 2.037708  | 0.481140  | H      | -4.544961 | -1.121388 | 1.183322  | H      | -3.587084 | -2.531102 | -0.562212 |
| O      | -1.234085 | -1.550947 | 0.913633  | H      | -2.736767 | 2.562955  | -0.202951 | H      | -3.582682 | -2.068475 | -2.106923 |
| H      | -3.409910 | -1.641595 | 0.077959  | H      | -3.613494 | 2.506813  | 1.328198  | C      | -1.974508 | -0.662365 | -0.358310 |
| H      | -3.146035 | -1.881292 | -1.494709 | H      | -2.028969 | 1.743770  | 1.199752  | N      | -1.181532 | 0.407631  | -0.600694 |
| C      | -1.100143 | -0.760526 | -0.016027 | O      | -1.338848 | -1.668479 | 0.223651  | H      | -1.545476 | 1.268038  | -0.987113 |
| N      | 0.118963  | -0.355801 | -0.445133 | H      | -3.473098 | -2.036826 | -0.643519 | C      | 0.192253  | 0.428295  | -0.165608 |
| H      | 0.216849  | 0.368884  | -1.143465 | H      | -3.270204 | -1.603338 | -2.183859 | H      | 0.258161  | -0.006791 | 0.838048  |
| C      | 1.326637  | -0.740677 | 0.244682  | C      | -1.489410 | -0.585630 | -0.335411 | C      | 1.102602  | -0.404900 | -1.106660 |
| H      | 1.153708  | -0.678711 | 1.326983  | N      | -0.460212 | 0.267375  | -0.554029 | C      | 0.621054  | 1.879977  | -0.110660 |
| C      | 1.763098  | -2.170308 | -0.086227 | H      | -0.630606 | 1.198112  | -0.912708 | H      | 0.515966  | -1.294109 | -1.355986 |
| C      | 2.396499  | 0.267047  | -0.124440 | C      | 0.854135  | 0.061396  | 0.008983  | H      | 1.268343  | 0.151182  | -2.035953 |
| H      | 1.951128  | -2.276789 | -1.158628 | H      | 0.794561  | -0.123087 | 1.092459  | C      | 2.406007  | -0.832247 | -0.488740 |
| H      | 2.670233  | -2.432386 | 0.463031  | C      | 1.575950  | -1.155064 | -0.577935 | O      | -0.000404 | 2.788239  | -0.619406 |
| H      | 0.959875  | -2.850183 | 0.203523  | C      | 1.615756  | 1.358368  | -0.194718 | C      | 3.625704  | -0.288500 | -0.892676 |
| O      | 2.256470  | 1.143628  | -0.948602 | H      | 0.825865  | -1.950761 | -0.651389 | C      | 2.403123  | -1.808189 | 0.513332  |
| O      | 3.521248  | 0.060009  | 0.561843  | H      | 1.960719  | -0.950357 | -1.582797 | H      | 3.640905  | 0.467443  | -1.674477 |
| C      | 4.591344  | 0.956267  | 0.265620  | C      | 2.664153  | -1.662219 | 0.354722  | C      | 4.819042  | -0.707403 | -0.310424 |
| H      | 5.421207  | 0.652523  | 0.893241  | O      | 1.105317  | 2.388088  | -0.580907 | C      | 3.592766  | -2.224760 | 1.100176  |
| H      | 4.867211  | 0.879240  | -0.797640 | O      | 2.627235  | -1.491732 | 1.560367  | H      | 1.455188  | -2.244482 | 0.822241  |
| H      | 4.300135  | 1.987195  | 0.470694  | N      | 3.664519  | -2.351522 | -0.255148 | H      | 5.761105  | -0.278155 | -0.640170 |
| 384    |           |           |           | H      | 4.335417  | -2.176600 | 0.333563  | C      | 4.805380  | -1.675193 | 0.689378  |
| ValArg |           |           |           | H      | 3.634987  | -2.582064 | -1.232823 | H      | 3.574818  | -2.986047 | 1.874984  |
| N      | -4.241927 | -2.317858 | -0.819722 | O      | 2.906572  | 1.232155  | 0.098149  | H      | 5.735613  | -2.004000 | 1.143700  |
| C      | -3.796492 | -0.935784 | -0.721711 | C      | 3.682315  | 2.424259  | -0.034243 | O      | 1.772605  | 2.031607  | 0.537444  |
| H      | -3.747432 | -0.514986 | -1.735266 | H      | 4.697524  | -2.145426 | 0.343896  | C      | 2.274958  | 3.368034  | 0.586580  |
| C      | -4.839026 | -0.104863 | 0.064479  | H      | 3.649714  | 2.791410  | -1.062754 | H      | 3.224885  | 3.304498  | 1.115180  |
| H      | -5.777489 | -0.286563 | -0.475155 | H      | 3.301923  | 3.202485  | 0.631191  | H      | 2.420420  | 3.761557  | -0.422083 |
| C      | -5.021539 | -0.602313 | 1.496030  | 386    |           |           |           | H      | 1.578949  | 4.018175  | 1.121860  |
| C      | -4.546511 | 1.392800  | 0.300024  | ValCys |           |           |           | 388    |           |           |           |
| H      | -4.098867 | -0.504181 | 2.076952  | N      | -3.592327 | -1.357777 | -1.012360 | ValGly |           |           |           |
| H      | -5.804305 | -0.026146 | 2.000099  | C      | -2.724524 | -0.214646 | -0.776901 | N      | -3.232305 | -1.197957 | -0.994500 |
| H      | -5.322221 | -1.653619 | 1.512968  | H      | -2.529113 | 0.274517  | -1.740861 | C      | -2.176104 | -0.216529 | -0.799388 |
| H      | -4.428448 | 1.761071  | -0.996081 | C      | -3.449471 | 0.820219  | 0.117383  | H      | -1.836418 | 0.127288  | -1.785899 |
| H      | -5.369970 | 1.952122  | 0.485130  | H      | -4.375884 | 1.035177  | -0.430645 | C      | -2.740125 | 1.019210  | -0.057407 |
| H      | -3.635105 | 1.644388  | 0.582961  | C      | -3.835873 | 0.246541  | 1.478136  | H      | -3.582076 | 1.339262  | -0.684747 |
| O      | -2.049284 | -1.664437 | 0.769475  | C      | -2.664269 | 2.120715  | 0.265719  | C      | -3.294124 | 0.668164  | 1.320869  |
| H      | -3.932466 | -2.783663 | 0.032008  | H      | -2.955023 | -0.053694 | 2.054574  | C      | -1.736708 | 2.166524  | 0.023038  |
| H      | -3.728736 | -2.776894 | -1.566725 | H      | -4.385762 | 0.992941  | 2.060393  | H      | -2.514652 | 0.272891  | 1.980185  |
| C      | -2.405356 | -0.854088 | -0.082030 | H      | -4.483438 | -0.627627 | 1.367231  | H      | -3.722559 | 1.557453  | 1.794455  |
| N      | -1.600825 | 0.150522  | -0.499033 | H      | -2.383693 | 2.542538  | -0.706830 | H      | -4.087389 | -0.080950 | 1.246956  |
| H      | -1.910564 | 0.834110  | -1.176101 | H      | -3.267209 | 2.871606  | 0.785652  | H      | -1.340330 | 2.431978  | -0.964405 |
| C      | -0.299498 | 0.376275  | 0.086561  | H      | -1.747264 | 1.979153  | 0.847734  | H      | -2.214211 | 3.061381  | 0.434310  |
| H      | -0.360988 | 0.200728  | 1.166789  | O      | -1.319618 | -1.603322 | 0.606757  | H      | -0.888200 | 1.922384  | 0.671551  |
| C      | 0.755374  | -0.581089 | -0.502854 | H      | -3.487667 | -1.979380 | -0.212380 | O      | -1.145418 | -1.708248 | 0.791746  |
| C      | 0.045985  | 1.829966  | -0.167905 | H      | -3.238125 | -1.886536 | -1.804001 | H      | -3.275210 | -1.753840 | -0.141745 |
| H      | 0.304290  | -1.578046 | -0.440330 | C      | -1.389212 | -0.652618 | -0.166282 | H      | -2.945658 | -1.852251 | -1.716790 |
| H      | 0.882262  | -0.348816 | -1.568185 | N      | -0.293346 | 0.058948  | -0.528512 | C      | -0.987911 | -0.833336 | -0.053166 |
| C      | 2.102647  | -0.583918 | 0.207999  | H      | -0.364983 | 0.877959  | -1.117961 | N      | 0.242691  | -0.368087 | -0.373088 |
| O      | -0.473674 | 2.506293  | -1.028902 | C      | 0.996720  | -0.172294 | 0.072251  | H      | 0.378419  | 0.387186  | -1.030703 |
| H      | 2.596262  | 0.388183  | 0.127492  | H      | 0.890274  | -0.300642 | 1.156575  | C      | 1.412563  | -0.827506 | 0.318579  |
| H      | 1.949787  | -0.785693 | 1.277537  | C      | 1.627364  | -1.455847 | -0.495091 | C      | 2.593281  | 0.007185  | -0.108251 |
| C      | 3.037342  | -1.638518 | -0.380524 | C      | 1.836973  | 1.061701  | -0.206948 | H      | 1.287910  | -0.759471 | 1.406377  |
| H      | 2.580160  | -2.633541 | -0.316234 | H      | 0.881631  | -2.238438 | -0.349407 | H      | 1.625284  | -1.883549 | 0.107418  |
| H      | 3.213987  | -1.420485 | -1.437750 | H      | 1.814028  | -1.331561 | -1.565774 | O      | 2.536215  | 0.909967  | -0.912470 |
| N      | 4.336913  | -1.707409 | 0.256403  | S      | 3.159995  | -1.951320 | 0.373195  | O      | 3.707537  | -0.381350 | 0.511863  |
| H      | 4.324376  | -2.007219 | 1.221226  | O      | 1.500652  | 1.954318  | -0.953513 | C      | 4.882208  | 0.355527  | 0.166210  |
| C      | 5.273384  | -0.727512 | -0.007809 | H      | 2.940761  | -3.273086 | 0.268943  | H      | 4.760020  | 1.411374  | 0.418659  |
| N      | 5.050694  | 0.177815  | -0.887172 | O      | 2.989913  | 1.028438  | 0.452769  | H      | 5.689335  | -0.086473 | 0.748670  |
| N      | 6.406199  | -0.865533 | 0.795414  | C      | 3.877867  | 2.120275  | 0.198793  | H      | 5.087895  | 0.269248  | -0.903197 |
| H      | 5.886004  | 0.736256  | -1.047084 | H      | 4.767511  | 1.917167  | 0.792338  | 389    |           |           |           |
| H      | 6.695484  | -1.823820 | 0.937595  | H      | 4.126205  | 2.170521  | -0.863576 | ValGln |           |           |           |
| H      | 7.177589  | -0.277953 | 0.517439  | H      | 3.416515  | 3.062560  | 0.502518  | N      | -3.456144 | -2.263275 | -0.789309 |
| O      | 0.999095  | 2.270756  | 0.652494  | 387    |           |           |           | C      | -2.994247 | -0.884392 | -0.738556 |
| C      | 1.428869  | 3.613960  | 0.418696  | ValPhe |           |           |           | H      | -2.898678 | -0.513356 | -1.768002 |
| H      | 2.191522  | 3.813180  | 1.170097  | N      | -3.971123 | -1.834064 | -1.198029 | C      | -4.054022 | -0.002649 | -0.034960 |
| H      | 1.846303  | 3.711754  | -0.585914 | C      | -3.444135 | -0.545526 | -0.775887 | H      | -4.971995 | -0.194384 | -0.605373 |
| H      | 0.591023  | 4.306689  | 0.525040  | H      | -3.517001 | 0.151400  | -1.621828 | C      | -4.305083 | -0.432510 | 1.407866  |
| 385    |           |           |           | C      | -4.319219 | 0.030977  | 0.363160  | C      | -3.734944 | 1.487335  | -0.123932 |
| ValAsn |           |           |           | H      | -5.330680 | 0.037128  | -0.063077 | H      | -3.407521 | -0.319242 | 2.024438  |
| N      | -3.648612 | -1.277217 | -1.299287 | C      | -4.339015 | -0.868799 | 1.596084  | H      | -5.100908 | 0.175061  | 1.850810  |

|        |           |           |           |        |           |           |           |         |           |           |           |
|--------|-----------|-----------|-----------|--------|-----------|-----------|-----------|---------|-----------|-----------|-----------|
| H      | -4.620867 | -1.478247 | 1.457781  | C      | 3.974366  | -0.128317 | 0.318102  | 393     |           |           |           |
| H      | -3.569041 | 1.807258  | -1.159613 | H      | 4.910606  | -0.503308 | 0.750792  | VallLys |           |           |           |
| H      | -4.566716 | 2.078884  | 0.271341  | C      | 4.237638  | 0.209813  | -1.146929 | N       | -3.500156 | -2.519788 | -0.730983 |
| H      | -2.842926 | 1.750462  | 0.454821  | C      | 3.540734  | 1.108343  | 1.101284  | C       | -3.139032 | -1.110557 | -0.711065 |
| O      | -1.314233 | -1.560783 | 0.853181  | H      | 3.326591  | 0.546004  | -1.652635 | H       | -3.089954 | -0.750886 | -1.747886 |
| H      | -3.191570 | -2.693242 | 0.095568  | H      | 4.982648  | 1.008543  | -1.221811 | C       | -4.246850 | -0.296229 | -0.000304 |
| H      | -2.921219 | -2.764898 | -1.492308 | H      | 4.628181  | -0.655394 | -1.689694 | H       | -5.157877 | -0.554622 | -0.555497 |
| C      | -1.628348 | -0.789794 | -0.049726 | H      | 3.356931  | 0.875530  | 2.157854  | C       | -4.447795 | -0.728594 | 1.449836  |
| N      | -0.790950 | 0.180897  | -0.484314 | H      | 4.325546  | 1.870708  | 1.071001  | C       | -4.030717 | 1.210994  | -0.105463 |
| H      | -1.072356 | 0.852595  | -1.185168 | H      | 2.632032  | 1.553927  | 0.682712  | H       | -3.547422 | -0.560360 | 2.049491  |
| C      | 0.483323  | 0.412505  | 0.152807  | O      | 1.379043  | -1.325544 | -1.299570 | H       | -5.269217 | -0.163977 | 1.902778  |
| H      | 0.359272  | 0.298968  | 1.237135  | H      | 3.378036  | -2.503415 | -1.083952 | H       | -4.702785 | -1.790125 | 1.512153  |
| C      | 1.544065  | -0.597022 | -0.330605 | H      | 3.083416  | -3.330698 | 0.267658  | H       | -3.896052 | 1.532518  | -1.145214 |
| C      | 0.871559  | 1.845201  | -0.156050 | C      | 1.628666  | -1.019640 | -0.142422 | H       | -4.897237 | 1.748151  | 0.292773  |
| H      | 1.040706  | -1.567740 | -0.358369 | N      | 0.712015  | -0.408485 | 0.662238  | H       | -3.153440 | 1.538091  | 0.462796  |
| H      | 1.854943  | -0.364814 | -1.354030 | H      | 0.978503  | -0.156730 | 1.601370  | O       | -1.386420 | -1.633940 | 0.859184  |
| C      | 2.774101  | -0.700174 | 0.559628  | C      | -0.603162 | -0.051382 | 0.184800  | H       | -3.192706 | -2.912210 | 0.157565  |
| O      | 0.336516  | 2.526209  | -1.002104 | H      | -0.637949 | -0.432331 | -0.844752 | H       | -2.938481 | -2.994411 | -1.431906 |
| H      | 3.211927  | 0.291031  | 0.726893  | C      | -1.713859 | -0.713634 | 1.018323  | C       | -1.770533 | -0.904942 | -0.050755 |
| H      | 2.500489  | -1.092581 | 1.546698  | C      | -0.762709 | 1.463403  | 0.103220  | N       | -1.015942 | 0.117102  | -0.519564 |
| C      | 3.847934  | -1.558321 | -0.089691 | H      | -1.385426 | -1.738414 | 1.212730  | H       | -1.355001 | 0.739189  | -1.240214 |
| O      | 4.010974  | -1.602859 | -1.297281 | H      | -1.781930 | -0.208576 | 1.991262  | C       | 0.252100  | 0.462220  | 0.080345  |
| N      | 4.646042  | -2.237713 | 0.776238  | C      | -3.054349 | -0.792043 | 0.371058  | H       | 0.178569  | 0.322386  | 1.164926  |
| H      | 5.369321  | -2.822632 | 0.390942  | O      | -1.730391 | 2.087741  | 0.488172  | C       | 1.385183  | -0.438460 | -0.451128 |
| H      | 4.461981  | -2.273709 | 1.763131  | N      | -3.866200 | 0.292684  | 0.585822  | C       | 0.491919  | 1.927558  | -0.223127 |
| O      | 1.887153  | 2.267106  | 0.602353  | C      | -3.778426 | -1.865326 | -0.091407 | H       | 1.016113  | -1.463273 | -0.335223 |
| C      | 2.336445  | 3.596910  | 0.325990  | H      | -3.584334 | 1.244954  | 0.334826  | H       | 1.499324  | -0.257008 | -1.527924 |
| H      | 3.153230  | 3.782179  | 1.022185  | C      | -5.004586 | -0.163616 | -0.433618 | C       | 2.725739  | -0.302181 | 0.261417  |
| H      | 2.684731  | 3.676507  | -0.706165 | N      | -4.989683 | -1.467546 | -0.589537 | O       | -0.047877 | 2.528238  | -1.126468 |
| H      | 1.526587  | 4.312612  | 0.483171  | H      | -3.484902 | -2.907101 | -0.082158 | H       | 3.118067  | 0.715178  | 0.145735  |
| 390    |           |           |           | H      | -5.811726 | 0.496488  | -0.721724 | H       | 2.577005  | -0.448503 | 1.340047  |
| Vallle |           |           |           | O      | 0.296152  | 2.043146  | -0.459823 | C       | 3.751352  | -1.308510 | 0.249394  |
| N      | 3.529523  | -1.734845 | 0.759546  | C      | 0.208225  | 3.461236  | -0.618053 | H       | 3.385288  | -2.332893 | -0.111233 |
| C      | 2.786102  | -0.485075 | 0.707326  | H      | 1.145519  | 3.762661  | -1.083109 | H       | 3.885702  | -1.173285 | -1.333056 |
| H      | 2.594169  | -0.154155 | 1.737010  | H      | -0.638875 | 3.721692  | -1.256662 | C       | 5.103478  | -1.183794 | 0.438363  |
| C      | 3.647854  | 0.609027  | 0.033049  | H      | 0.084078  | 3.948725  | 0.351562  | H       | 5.465148  | -0.143771 | 0.331095  |
| H      | 4.568436  | 0.622106  | 0.630823  | 392    |           |           |           | H       | 4.971773  | -1.352385 | 1.514850  |
| C      | 4.029190  | 0.250354  | -1.400851 | ValLeu |           |           |           | N       | 6.026695  | -2.192828 | -0.061772 |
| C      | 3.005910  | 1.991781  | 0.107521  | N      | -3.577437 | -1.773689 | -0.838132 | H       | 6.242421  | -2.004910 | -1.036300 |
| H      | 3.146049  | 0.151399  | -2.040214 | C      | -2.875112 | -0.502547 | -0.747467 | H       | 6.907577  | -2.138944 | 0.438642  |
| H      | 4.673284  | 1.026518  | -1.826801 | H      | -2.745477 | -0.106923 | -1.764064 | O       | 3.792621  | 2.477465  | 0.608177  |
| H      | 4.581140  | -0.692993 | -1.437197 | C      | -3.739168 | 0.519343  | 0.029365  | C       | 1.680747  | 3.850642  | 0.349224  |
| H      | 2.731482  | 2.259728  | 1.134876  | H      | -4.685484 | 0.538587  | -0.526640 | H       | 2.409757  | 4.139728  | 1.104992  |
| H      | 3.702282  | 2.754865  | -0.253892 | C      | -4.046007 | 0.062348  | 1.453123  | H       | 2.097190  | 3.970622  | -0.653615 |
| H      | 2.102593  | 2.056449  | -0.508591 | C      | -3.142409 | 1.924078  | 0.013850  | H       | 0.778787  | 4.461282  | 0.431614  |
| O      | 1.321539  | -1.475091 | -0.931328 | H      | -3.133426 | -0.046370 | 2.047929  | 394     |           |           |           |
| H      | 3.389713  | -2.196353 | -0.137884 | H      | -4.694014 | 0.790101  | 1.952386  | ValMet  |           |           |           |
| H      | 3.092254  | -2.350645 | 1.438988  | H      | -4.567775 | -0.898698 | 1.454170  | N       | -3.548386 | -2.321392 | -0.735199 |
| C      | 1.443434  | -0.675195 | -0.008082 | H      | -2.922031 | 2.262847  | -1.005555 | C       | -3.104533 | -0.936517 | -0.700328 |
| N      | 0.406268  | 0.074881  | 0.436061  | H      | -3.843901 | 2.640708  | 0.452320  | H       | -3.053362 | -0.562880 | -1.732045 |
| H      | 0.539503  | 0.794997  | 1.133040  | H      | -2.214392 | 1.978223  | 0.593075  | C       | -4.148566 | -0.070354 | 0.045116  |
| C      | -0.878654 | 0.055645  | -0.223832 | O      | -1.303916 | -1.519819 | 0.771680  | H       | -5.084671 | -0.272156 | -0.491356 |
| H      | -0.718466 | -0.007109 | -1.307191 | H      | -3.383763 | -2.277053 | 0.026171  | C       | -3.439884 | -0.507803 | 1.494906  |
| C      | -1.721002 | -1.178346 | 0.198978  | H      | -3.149599 | -2.335942 | -1.568126 | C       | -3.852320 | 1.423851  | -0.050429 |
| C      | -1.549389 | 1.375896  | 0.101489  | C      | -1.494213 | -0.683101 | -0.106643 | H       | -3.420204 | -0.389068 | 2.076859  |
| H      | -1.012740 | -2.010291 | 0.092524  | N      | -0.504938 | 0.122109  | -0.559546 | H       | -5.123300 | 0.090942  | 1.970680  |
| C      | -2.153502 | -1.084750 | 1.658841  | H      | -0.676644 | 0.830672  | -1.259341 | H       | -4.644354 | -1.556466 | 1.552776  |
| C      | -2.885332 | -1.449417 | -0.758526 | C      | 0.822428  | 0.092792  | 0.011611  | H       | -3.727988 | 1.749154  | -1.090284 |
| O      | -1.176412 | 2.128073  | 0.975597  | H      | 0.732752  | -0.047768 | 1.093605  | H       | -4.677080 | 2.003207  | 0.376257  |
| H      | -2.922411 | -0.315519 | 1.800841  | C      | 1.647095  | -1.069875 | -0.578892 | H       | -2.943917 | 1.697246  | 0.497262  |
| H      | -2.568382 | -2.033311 | 2.009311  | H      | 1.449980  | 1.441642  | -0.272212 | O       | -1.354629 | -1.589215 | 0.824560  |
| H      | -1.306264 | -0.837844 | 2.305772  | C      | 1.032777  | -1.964679 | -0.421773 | H       | -3.247928 | -2.747773 | 0.139878  |
| H      | -3.636043 | -0.655940 | -0.666642 | H      | 1.718054  | -0.914669 | -1.663288 | H       | -3.031652 | -2.816297 | -1.456294 |
| H      | -2.509236 | -1.395043 | -1.788375 | C      | 3.041423  | -1.316519 | 0.005147  | C       | -1.714815 | -0.822925 | -0.063838 |
| C      | -3.540660 | -2.809024 | -0.543681 | O      | 1.075184  | 2.193400  | -1.145250 | N       | -0.907684 | 0.161263  | -0.529137 |
| H      | -4.018261 | -2.884617 | 0.438170  | H      | 3.665716  | -0.434106 | -0.188825 | H       | -1.227086 | 0.831143  | -1.215297 |
| H      | -4.314023 | -2.991275 | -1.296016 | C      | 3.005198  | -1.546075 | 1.514861  | C       | 0.381278  | 0.418556  | 0.066158  |
| H      | -2.806253 | -3.618392 | -0.620620 | C      | 3.678142  | -2.508569 | -0.707623 | H       | 0.305632  | 0.270659  | 1.150216  |
| O      | -2.607948 | 1.612388  | -0.675639 | H      | 2.316664  | -2.360073 | 1.770385  | C       | 1.449338  | -0.551322 | -0.482931 |
| C      | -3.302694 | 2.830146  | -0.396742 | H      | 3.997837  | -1.817978 | 1.888623  | C       | 0.713641  | 1.870296  | -0.219661 |
| H      | -4.127294 | 2.868048  | -1.107231 | H      | 2.686988  | -0.650470 | 2.056118  | H       | 0.996277  | -1.546074 | -0.430412 |
| H      | -3.677667 | 2.832382  | 0.629305  | H      | 3.728092  | -2.351255 | -1.790430 | H       | 1.629767  | -0.326003 | -1.540752 |
| H      | -2.639377 | 3.687533  | -0.531233 | H      | 4.696503  | -2.684450 | -0.346390 | C       | 2.756856  | -0.557961 | 0.296227  |
| 391    |           |           |           | O      | 3.099711  | -3.422875 | -0.529880 | O       | 0.158200  | 2.538592  | -1.063056 |
| ValHis |           |           |           | H      | 2.478386  | 1.699484  | 0.539086  | H       | 3.238301  | 0.423963  | 0.275951  |
| N      | 3.580522  | -2.518631 | -0.086008 | C      | 3.146760  | 2.939341  | 0.294803  | H       | 2.565136  | -0.820157 | 1.343555  |
| C      | 2.996237  | -1.316379 | 0.484481  | H      | 3.950521  | 2.990169  | 1.027955  | S       | 3.881575  | -1.788496 | -0.429592 |
| H      | 2.865397  | -1.476910 | 1.563863  | H      | 3.549150  | 2.965159  | -0.720464 | C       | 5.293966  | -1.583689 | 0.678779  |
|        |           |           |           | H      | 2.456430  | 3.776224  | 0.422120  |         |           |           |           |

|        |           |           |           |        |           |           |           |        |           |           |           |
|--------|-----------|-----------|-----------|--------|-----------|-----------|-----------|--------|-----------|-----------|-----------|
| H      | 5.028922  | -1.828470 | 1.711146  | H      | -4.721778 | -1.840499 | 1.236629  | H      | 2.011606  | 3.764644  | 0.042272  |
| H      | 6.068387  | -2.277431 | 0.344531  | H      | -4.620437 | -1.458604 | -0.512216 | H      | 0.999031  | 3.038092  | -1.219540 |
| H      | 5.693691  | -0.566664 | 0.633221  | H      | -3.592713 | -2.739127 | 0.169862  | H      | 2.926975  | 2.159088  | 1.671366  |
| O      | 1.699978  | 2.323195  | 0.557046  |        |           |           |           | O      | 3.043764  | -0.952948 | -0.769831 |
| C      | 2.088378  | 3.678402  | 0.314334  | 397    |           |           |           | C      | 3.823801  | -2.128191 | -0.547730 |
| H      | 2.889889  | 3.885961  | 1.021851  | ValTyr |           |           |           | H      | 4.704921  | -2.022737 | -1.179610 |
| H      | 2.439925  | 3.798668  | -0.712842 | N      | -4.174362 | -1.997150 | -1.207031 | H      | 4.110765  | -2.202489 | 0.503742  |
| H      | 1.244490  | 4.351518  | 0.480526  | C      | -3.735165 | -0.693169 | -0.734331 | H      | 3.258438  | -3.021484 | -0.823401 |
|        |           |           |           | H      | -3.893080 | 0.036989  | -1.539723 |        |           |           |           |
| 395    |           |           |           | C      | -4.610963 | -0.246888 | 0.461069  | 399    |           |           |           |
| ValPro |           |           |           | H      | -5.634540 | -0.296683 | 0.067849  | ValTrp |           |           |           |
| N      | 1.620565  | -1.862036 | -1.159072 | C      | -4.518434 | -1.208563 | 1.642830  | N      | 4.100733  | -1.929748 | 1.520491  |
| C      | 1.368853  | -0.908167 | -0.088103 | C      | -4.329824 | 1.190098  | 0.892709  | C      | 3.765362  | -0.690162 | 0.837300  |
| H      | 0.538138  | -1.300596 | 0.508356  | H      | -3.501110 | -1.256797 | 2.044271  | H      | 4.045688  | 0.149839  | 1.487334  |
| C      | 2.578083  | -0.827027 | 0.871354  | H      | -5.186784 | -0.884554 | 2.447148  | C      | 4.604983  | -0.561287 | -0.457293 |
| H      | 2.670931  | -1.846269 | 1.269983  | H      | -4.817157 | -2.219700 | 1.352859  | H      | 5.640739  | -0.655351 | -0.106222 |
| C      | 3.892173  | -0.483801 | 0.175587  | H      | -4.397721 | 1.889988  | 0.051223  | C      | 4.341532  | -1.699897 | -1.439316 |
| C      | 2.303817  | 0.124335  | 2.033700  | H      | -5.058053 | 1.510812  | 1.644174  | C      | 4.445951  | 0.799280  | -1.130122 |
| H      | 3.852062  | 0.505049  | -0.288162 | H      | -3.334245 | 1.295109  | 1.337173  | H      | 3.302668  | -1.702860 | -1.784718 |
| H      | 4.713298  | -0.498084 | 0.900398  | O      | -1.716506 | -1.720954 | 0.091380  | H      | 4.990729  | -1.600756 | -2.315270 |
| H      | 4.126641  | -1.217539 | -0.600963 | H      | -3.711049 | -2.692345 | -0.924209 | H      | 4.549915  | -1.671213 | -0.82145  |
| H      | 1.377807  | -0.132802 | 2.562071  | H      | -3.805076 | -2.152144 | -2.140600 | H      | 4.642823  | 1.624249  | -0.435010 |
| H      | 3.118822  | 0.086852  | 2.763326  | C      | -2.246639 | -0.713033 | -0.370750 | H      | 5.151414  | 0.896802  | -1.961252 |
| H      | 2.220844  | 1.161611  | 1.689541  | N      | -1.549111 | 0.427053  | -0.583787 | H      | 3.439066  | 0.937242  | -1.538376 |
| O      | 1.761995  | 1.008655  | -1.471020 | H      | -1.993904 | 1.272561  | -0.94319  | O      | 1.608900  | -1.621655 | 0.303614  |
| H      | 2.210158  | -1.393787 | -1.844096 | C      | -0.164989 | 0.536443  | -0.195879 | H      | 3.533508  | -2.661666 | 1.095984  |
| H      | 0.738188  | -2.035453 | -1.635005 | H      | -0.026436 | 0.063123  | 0.782692  | H      | 3.777655  | -1.875267 | 2.482059  |
| C      | 1.016145  | 0.467677  | -0.660581 | C      | 0.770867  | -0.179106 | -1.207072 | C      | 2.262599  | -0.609457 | 0.547281  |
| N      | -0.123956 | 1.094049  | -0.249357 | C      | 0.151869  | 2.012972  | -0.087115 | N      | 1.703339  | 0.621558  | 0.570461  |
| C      | -0.432224 | 2.432583  | -0.739851 | H      | 0.242925  | -1.097735 | -1.479997 | H      | 2.255819  | 1.452182  | 0.734009  |
| C      | -1.211345 | 0.525641  | 0.522719  | H      | 0.855524  | 0.430626  | -2.113772 | C      | 0.318836  | 0.831510  | 0.223366  |
| H      | -0.833793 | 2.389722  | -1.761664 | C      | 2.126419  | -0.530068 | -0.660194 | H      | 0.056224  | 0.187086  | -0.621991 |
| H      | 0.481418  | 3.029106  | -0.769158 | O      | -0.549769 | 2.890835  | -0.542499 | C      | -0.624163 | 0.483847  | 1.408149  |
| C      | -1.474973 | 2.916881  | 0.258015  | C      | 3.284585  | 0.129752  | -1.065391 | C      | 0.181898  | 2.281719  | -0.186768 |
| C      | -2.275967 | 1.649448  | 0.548118  | C      | 2.249682  | -1.557936 | 0.282767  | H      | -0.219483 | -0.442268 | 1.830626  |
| H      | -0.899419 | 0.275971  | 1.544548  | H      | 3.218140  | 0.928807  | -1.799982 | H      | -0.530584 | 1.258688  | 2.177658  |
| C      | -1.797632 | -0.727682 | -0.109195 | C      | 4.530833  | -0.217669 | -0.552162 | C      | -2.047893 | 0.273597  | 1.021847  |
| H      | -2.095515 | 3.727135  | -0.132956 | C      | 3.482833  | -1.912315 | 0.808062  | O      | 0.987621  | -3.142334 | 0.099587  |
| H      | -0.981721 | 3.273732  | 1.168779  | H      | 1.356414  | -2.091868 | 0.600771  | C      | -3.125794 | 1.063901  | 1.316427  |
| H      | -3.005430 | 1.482994  | -0.252558 | H      | 5.424274  | 0.306170  | -0.887043 | C      | -1.954402 | -1.958298 | -0.329372 |
| H      | -2.820285 | 1.667095  | 1.494198  | C      | 4.633335  | -1.240228 | 0.389915  | C      | -2.553801 | -0.828272 | 0.247787  |
| O      | -1.571284 | -1.133848 | -1.223867 | H      | 3.578560  | -2.711910 | 1.535426  | H      | -3.168716 | 1.983727  | 1.883951  |
| O      | -2.640195 | -1.316566 | 0.748585  | O      | 5.817731  | -1.628127 | 0.929927  | N      | -4.267389 | 0.524921  | 0.770603  |
| C      | -3.288539 | -2.489723 | 0.253407  | H      | 6.523713  | -1.097451 | 0.547525  | C      | -3.950237 | -0.637439 | 0.111081  |
| H      | -2.550784 | -3.248216 | -0.018424 | O      | 1.304369  | 2.227974  | 0.542006  | C      | -2.755786 | -2.851932 | -1.021259 |
| H      | -3.920529 | -2.844378 | 1.066610  | C      | 1.700926  | 3.596810  | 0.637982  | H      | -0.883928 | -2.124666 | -0.229259 |
| H      | -3.891569 | -2.253157 | -0.626429 | H      | 1.798955  | 4.039764  | -0.355903 | H      | -5.192764 | 0.902393  | 0.872026  |
|        |           |           |           | H      | 0.965033  | 4.169169  | 1.207628  | C      | -4.758898 | -1.537298 | -0.584740 |
|        |           |           |           | H      | 2.661296  | 3.588315  | 1.151374  | C      | -4.140997 | -2.642984 | -1.148056 |
| 396    |           |           |           | 398    |           |           |           | H      | -2.309581 | -3.732485 | -1.473995 |
| ValSer |           |           |           | ValThr |           |           |           | H      | -5.829731 | -1.380876 | -0.681568 |
| N      | 3.526669  | 1.301397  | -0.703764 | N      | -3.587293 | 1.359119  | 0.114103  | H      | -4.740303 | -3.363760 | -1.696778 |
| C      | 2.510988  | 0.259986  | -0.717658 | C      | -2.545861 | 0.432299  | 0.530966  | O      | -0.936550 | 2.505443  | -0.871692 |
| H      | 2.263769  | 0.032419  | -1.763614 | H      | -2.331213 | 0.609854  | 1.593495  | C      | -1.156742 | 3.865479  | -1.246901 |
| C      | 3.081583  | -1.037194 | -0.095370 | C      | -3.059550 | -1.023129 | 0.408091  | H      | -1.209100 | 4.505747  | -0.363012 |
| H      | 3.982108  | -1.237223 | -0.690335 | H      | -4.007071 | -1.007376 | 0.961853  | H      | -0.348550 | 4.220823  | -1.890472 |
| C      | 3.515390  | -0.846965 | 1.355658  | C      | -3.371810 | -1.411267 | -1.034834 | H      | -2.104736 | 3.872449  | -1.782997 |
| C      | 2.134635  | -2.225504 | -0.239930 | C      | -2.131235 | -2.037013 | 1.071611  |        |           |           |           |
| H      | 2.669023  | -0.585606 | 1.998941  | H      | -2.474533 | -1.394517 | -1.662019 | 400    |           |           |           |
| H      | 3.962927  | -1.769221 | 1.740105  | H      | -3.790992 | -2.421958 | -1.071502 | ValVal |           |           |           |
| H      | 4.264982  | -0.055527 | 1.442422  | H      | -4.106717 | -0.733309 | -1.478138 | N      | 3.560762  | -1.459409 | 0.620626  |
| H      | 1.817493  | -2.370757 | -1.279617 | H      | -1.935011 | -1.778302 | 2.119347  | C      | 2.624365  | -0.347400 | 0.682820  |
| H      | 2.628634  | -3.147239 | 0.082786  | H      | -2.589832 | -3.030952 | 1.064621  | H      | 2.372998  | -0.165467 | 1.736535  |
| H      | 1.234721  | -2.104922 | 0.372498  | H      | -1.165444 | -2.118310 | 0.562426  | C      | 3.302601  | 0.937757  | 0.150076  |
| O      | 1.293191  | 1.483177  | 0.964998  | H      | -1.165444 | -2.118310 | 0.562426  | H      | 4.212513  | 1.022851  | 0.758055  |
| H      | 3.485676  | 1.738802  | 0.215288  | O      | -1.300403 | 1.062285  | -1.431248 | C      | 3.728635  | 0.811048  | -1.310202 |
| H      | 3.258549  | 2.034421  | -1.353887 | H      | -3.522464 | 1.436325  | -0.899536 | C      | 2.455440  | 2.187284  | 0.375048  |
| C      | 1.239848  | 0.723090  | 0.003649  | H      | -3.358811 | 2.287411  | 0.457831  | H      | 2.868016  | 0.660835  | -1.970040 |
| N      | 0.063875  | 0.245967  | -0.473122 | C      | -1.260986 | 0.653821  | -0.275155 | H      | 4.250069  | 1.718293  | -1.632308 |
| H      | 0.027922  | -0.381029 | -1.264973 | N      | -0.089202 | 0.388332  | 0.359246  | H      | 4.413264  | -0.030110 | -1.450047 |
| C      | -1.196689 | 0.531485  | 0.168438  | H      | -0.094189 | -0.061218 | 1.262765  | H      | 2.152490  | 2.290948  | 1.423882  |
| H      | -1.065944 | 0.556046  | 1.253811  | C      | 1.163782  | 0.406565  | -0.344846 | H      | 3.022336  | 3.084898  | 0.108905  |
| C      | -1.721906 | 1.898733  | -0.287295 | H      | 0.932364  | 0.471459  | -1.414432 | H      | 1.547198  | 2.182173  | -0.237285 |
| C      | -2.161909 | -0.570936 | -0.221100 | C      | 2.046493  | 1.605722  | 0.028356  | O      | 1.353957  | -1.385854 | -1.082277 |
| H      | -0.964946 | 2.637201  | 0.009112  | C      | 1.904896  | -0.893002 | -0.072568 | H      | 3.501263  | -1.838695 | -0.323065 |
| H      | -1.790088 | 1.888897  | -1.386892 | H      | 2.939259  | 1.552668  | -0.613188 | H      | 3.225519  | -2.206627 | 1.221731  |
| O      | -2.968802 | 2.125841  | 0.321742  | C      | 1.337990  | 2.930836  | -0.185590 | C      | 1.336957  | -0.672005 | -0.083716 |
| O      | -2.096310 | -1.163137 | -1.277428 | O      | 2.399886  | 1.406372  | 1.386492  | N      | 0.188836  | -0.138506 | 0.399132  |
| H      | -3.224228 | 3.035990  | 0.148190  | O      | 1.521214  | -1.762981 | 0.672898  | H      | 0.196806  | 0.521771  | 1.164709  |
| O      | -3.076431 | -0.798310 | 0.714004  | H      | 0.467576  | 2.999279  | 0.471914  | C      | -1.065395 | -0.285085 | -0.302414 |
| C      | -4.062384 | -1.773719 | 0.372535  |        |           |           |           |        |           |           |           |

|                                                    |           |           |           |                     |           |           |           |                     |           |           |           |
|----------------------------------------------------|-----------|-----------|-----------|---------------------|-----------|-----------|-----------|---------------------|-----------|-----------|-----------|
| H                                                  | -0.875307 | -0.226732 | -1.381029 | H                   | -2.994491 | 2.673350  | -0.385177 | H                   | -3.789625 | 3.032313  | -1.809245 |
| C                                                  | -1.723597 | -1.661460 | -0.015647 | H                   | -3.943323 | 2.515789  | -1.891297 | H                   | -4.563032 | 3.166487  | -0.194442 |
| C                                                  | -1.931962 | 0.887796  | 0.111982  | H                   | -4.771480 | 2.534527  | -0.298860 | N                   | -1.207918 | -0.359982 | -0.393193 |
| H                                                  | -0.903111 | -2.368683 | -0.186212 | N                   | -0.768707 | -0.284639 | -0.386881 | H                   | -1.601906 | 0.303398  | -1.053512 |
| C                                                  | -2.182255 | -1.781689 | 1.433618  | H                   | -1.283163 | 0.281371  | -1.054676 | C                   | 0.072124  | 0.012055  | 0.168715  |
| C                                                  | -2.839076 | -2.000448 | -0.998370 | C                   | 0.405000  | 0.333509  | 0.185779  | H                   | 0.078798  | -0.268247 | 1.228535  |
| O                                                  | -1.697555 | 1.600523  | 1.063827  | H                   | 0.416427  | 0.110223  | 1.260366  | C                   | 1.224582  | -0.715107 | -0.551773 |
| H                                                  | -3.033873 | -1.122888 | 1.641668  | C                   | 1.698592  | -0.211140 | -0.453180 | C                   | 0.182811  | 1.517393  | 0.034437  |
| H                                                  | -2.500176 | -2.805805 | 1.651258  | C                   | 0.255680  | 1.827765  | -0.018926 | H                   | 0.926156  | -1.769031 | -0.597968 |
| H                                                  | -1.378663 | -1.524811 | 2.130458  | H                   | 1.549988  | -1.286057 | -0.589134 | H                   | 1.278619  | -0.348607 | -1.585017 |
| H                                                  | -2.494131 | -1.922108 | -2.034431 | H                   | 1.837567  | 0.216941  | -1.451195 | C                   | 2.581164  | -0.594719 | 0.130051  |
| H                                                  | -3.178581 | -3.028455 | -0.837031 | C                   | 2.937532  | 0.013767  | 0.398434  | O                   | -0.461603 | 2.172710  | -0.758211 |
| H                                                  | -3.701038 | -1.338087 | -0.880047 | O                   | -0.545612 | 2.333844  | -0.774843 | H                   | 2.913076  | 0.446118  | 0.169761  |
| O                                                  | -2.992898 | 1.039751  | -0.682952 | H                   | 3.064256  | 1.071322  | 0.657174  | H                   | 2.500647  | -0.955731 | 1.164576  |
| C                                                  | -3.868709 | 2.111514  | -0.325529 | H                   | 2.862213  | -0.523148 | 1.350650  | C                   | 3.645494  | -1.400380 | -0.612330 |
| H                                                  | -4.670718 | 2.094266  | -1.062197 | C                   | 4.190542  | -0.434314 | -0.309229 | H                   | 3.361843  | -2.458709 | -0.658942 |
| H                                                  | -4.266783 | 1.963265  | 0.680916  | O                   | 4.272194  | -0.720118 | -1.480709 | H                   | 3.730792  | -1.032286 | -1.638827 |
| H                                                  | -3.337335 | 3.065348  | -0.357511 | O                   | 1.126769  | 2.519462  | 0.713554  | N                   | 4.968062  | -1.321485 | -0.027041 |
| <b>XYZ coordinates of the 400 thio-dipeptides</b>  |           |           |           | C                   | 1.069762  | 3.940414  | 0.550455  | H                   | 5.058386  | -1.740200 | 0.887966  |
| <b>optimized with the PBE0/6-31G(d,p) level of</b> |           |           |           | H                   | 1.846753  | 4.341245  | 1.199436  | C                   | 5.713786  | -0.171205 | -0.190904 |
| <b>theory</b>                                      |           |           |           | H                   | 1.255806  | 4.213981  | -0.490356 | N                   | 5.294948  | 0.785421  | -0.934315 |
|                                                    |           |           |           | H                   | 0.088757  | 4.316407  | 0.848763  | N                   | 6.897188  | -0.212220 | 0.546733  |
|                                                    |           |           |           | O                   | 5.234816  | -0.458887 | 0.534593  | H                   | 6.016987  | 1.493063  | -1.048981 |
| I                                                  |           |           |           | C                   | 6.472828  | -0.850853 | -0.055146 | H                   | 7.348896  | -1.116677 | 0.551558  |
| <sup>1</sup> AspAsp                                |           |           |           | H                   | 7.207087  | -0.823620 | 0.749494  | H                   | 7.543349  | 0.529743  | -0.324235 |
| N                                                  | -3.138409 | -2.591996 | -1.114673 | H                   | 6.399605  | -1.858277 | -0.472142 | O                   | 1.083276  | 2.027192  | 0.867671  |
| C                                                  | -2.696266 | -1.279594 | -0.704181 | H                   | 6.756074  | -0.162182 | -0.855244 | C                   | 1.299688  | 3.436192  | 0.749554  |
| H                                                  | -2.745707 | -0.609423 | -1.572047 |                     |           |           |           | H                   | 2.070685  | 3.675720  | 1.479989  |
| C                                                  | -3.547491 | -0.643612 | 0.423257  | 3                   |           |           |           | H                   | 1.634517  | 3.687008  | -0.59180  |
| C                                                  | -1.244957 | -1.346197 | -0.236203 | <sup>1</sup> AspAla |           |           |           | H                   | 0.378808  | 3.981262  | 0.968684  |
| H                                                  | -4.595754 | -0.667108 | 0.099054  | N                   | -3.403599 | -1.200626 | -0.986318 |                     |           |           |           |
| H                                                  | -3.455563 | -1.228882 | 1.340946  | C                   | -2.302741 | -0.320846 | -0.669413 | 5                   |           |           |           |
| C                                                  | -3.212627 | 0.792114  | 0.745090  | H                   | -1.972301 | 0.170056  | -1.593929 | <sup>1</sup> AspAsn |           |           |           |
| O                                                  | -3.047401 | 1.245952  | 1.850242  | C                   | -2.652097 | 0.793591  | 0.349253  | N                   | -2.823498 | -2.547660 | -1.240936 |
| S                                                  | -0.673078 | -2.601869 | 0.687706  | C                   | -1.133095 | -1.131671 | -0.117187 | C                   | -2.407698 | -1.238073 | -0.790364 |
| O                                                  | -3.142436 | 1.534931  | -0.379555 | H                   | -3.539148 | 1.318663  | -0.027547 | H                   | -2.394919 | -0.561061 | -1.654075 |
| H                                                  | -4.147323 | -2.606420 | -1.216472 | H                   | -2.895565 | 0.354842  | 1.319509  | C                   | -3.335258 | -0.612921 | 0.278963  |
| H                                                  | -2.878221 | -3.264861 | -0.396612 | C                   | -1.576584 | 1.830788  | 0.558646  | C                   | -0.990253 | -1.317179 | -0.226171 |
| C                                                  | -2.882424 | 2.926232  | -0.171665 | O                   | -1.180752 | 2.229141  | 1.626149  | H                   | -4.358779 | -0.632165 | -0.117868 |
| H                                                  | -1.870784 | 3.071197  | 0.210994  | S                   | -1.360739 | -2.396437 | 0.936604  | H                   | -3.311962 | -1.208522 | 1.194465  |
| H                                                  | -2.980682 | 3.393195  | -1.151165 | O                   | -1.115645 | 2.293937  | -0.622228 | C                   | -3.033136 | 0.819777  | 0.644762  |
| H                                                  | -3.604223 | 3.346512  | 0.531855  | H                   | -4.252339 | -0.663898 | -1.127928 | O                   | -3.020051 | 1.270390  | 1.763147  |
| N                                                  | -0.515925 | -0.281586 | -0.583206 | H                   | -3.550651 | -1.833915 | -0.202872 | S                   | -0.502693 | -2.572261 | 0.746973  |
| H                                                  | -0.954707 | 0.488337  | -1.080089 | C                   | -0.131522 | 3.327645  | -0.523928 | O                   | -2.807877 | 1.566475  | -0.456922 |
| C                                                  | 0.842725  | -0.046978 | -1.059299 | H                   | 0.789412  | 2.935710  | -0.089453 | H                   | -3.825445 | -2.560400 | -1.398895 |
| H                                                  | 0.957468  | -0.368032 | 0.883341  | H                   | 0.049096  | 3.658985  | -1.546113 | H                   | -2.607477 | -3.223141 | -0.510106 |
| C                                                  | 1.847829  | -0.840349 | -1.016628 | H                   | -0.505847 | 4.150747  | 0.088605  | C                   | -2.563962 | 2.953210  | -0.205387 |
| C                                                  | 1.089419  | 1.446237  | -0.266216 | N                   | 0.064445  | -0.685561 | -0.503388 | H                   | -1.628636 | 3.082026  | 0.341274  |
| H                                                  | 1.520120  | -1.885994 | -0.985668 | H                   | 0.126741  | 0.148789  | -1.079213 | H                   | -2.489342 | 3.421551  | -1.186121 |
| H                                                  | 1.836123  | -0.496638 | -2.052969 | C                   | 1.323050  | -1.201155 | -0.015662 | H                   | -3.386229 | 3.384777  | 0.369467  |
| C                                                  | 3.270833  | -0.782131 | -0.517927 | H                   | 1.198693  | -1.462882 | 1.042759  | N                   | -0.223098 | -0.271753 | -0.543541 |
| O                                                  | 0.315252  | 2.228729  | -0.774063 | C                   | 1.778422  | -2.447169 | -0.780321 | H                   | -0.634321 | 0.510673  | -1.044962 |
| O                                                  | 4.232706  | -0.523614 | -1.200018 | C                   | 2.343161  | -0.087568 | -0.134197 | C                   | 1.108865  | -0.038148 | -0.034327 |
| O                                                  | 2.271336  | 1.779939  | 0.239023  | H                   | 1.915189  | -2.220380 | -1.841577 | H                   | 1.146153  | -0.254009 | 1.044194  |
| C                                                  | 2.625010  | 3.161428  | 0.119408  | H                   | 2.720450  | -2.817882 | -0.370269 | C                   | 2.163292  | -0.938623 | -0.687229 |
| H                                                  | 3.621532  | 3.246510  | 0.549196  | H                   | 1.016134  | -3.221933 | -0.676728 | C                   | 1.400155  | 1.435891  | -0.247733 |
| H                                                  | 2.631695  | 3.462419  | -0.930157 | O                   | 2.157811  | 0.951147  | -0.731736 | H                   | 1.707149  | -1.927743 | -0.813934 |
| H                                                  | 1.913889  | 3.783095  | 0.667683  | C                   | 3.480139  | -0.406022 | 0.478574  | C                   | 2.451603  | -0.571015 | -1.678023 |
| O                                                  | 3.338030  | -1.094102 | 0.884174  | O                   | 4.515094  | 0.577239  | 0.397415  | H                   | 3.375779  | -1.122884 | 0.213751  |
| C                                                  | 4.649155  | -1.069740 | 1.342741  | H                   | 5.362889  | 0.156600  | 0.935937  | O                   | 0.599990  | 2.225255  | -0.706030 |
| H                                                  | 5.079846  | -0.068144 | 1.265167  | H                   | 4.778133  | 0.771151  | -0.644875 | O                   | 3.341911  | -0.921188 | 1.413240  |
| H                                                  | 4.532109  | -1.355756 | 2.387383  | H                   | 4.190478  | 1.510900  | 0.862264  | N                   | 4.496848  | -1.551308 | -0.427546 |
| H                                                  | 5.302642  | -1.774165 | 0.822731  |                     |           |           |           | H                   | 5.273471  | -1.835608 | 0.147564  |
|                                                    |           |           |           | 4                   |           |           |           | H                   | 4.470655  | -1.865346 | -1.382477 |
| 2                                                  |           |           |           | <sup>1</sup> AspArg |           |           |           | O                   | 2.636861  | 1.753481  | 0.111195  |
| <sup>1</sup> AspGlu                                |           |           |           | N                   | -3.616901 | -2.893674 | -0.965683 | C                   | 2.986252  | 3.130959  | -0.039757 |
| N                                                  | -2.649374 | -3.243269 | -0.886470 | C                   | -3.290207 | -1.515575 | -0.682465 | H                   | 4.018096  | 3.208714  | 0.298732  |
| C                                                  | -2.595845 | -1.821467 | -0.640888 | H                   | -3.251659 | -0.964644 | -1.631095 | H                   | 2.896924  | 3.437332  | -1.084551 |
| H                                                  | -2.657469 | -1.298666 | -1.604135 | C                   | -4.313363 | -0.794203 | 0.231103  | H                   | 2.333494  | 3.757804  | 0.571819  |
| C                                                  | -3.743611 | -1.285275 | 0.252514  | C                   | -1.914187 | -1.430297 | -0.026770 |                     |           |           |           |
| C                                                  | -1.266637 | -1.456563 | 0.014092  | H                   | -5.306916 | -0.928378 | -0.215390 | 6                   |           |           |           |
| H                                                  | -4.690278 | -1.618630 | -0.191348 | H                   | -4.315707 | -1.247099 | 1.225147  | <sup>1</sup> AspCys |           |           |           |
| H                                                  | -3.664920 | -1.703769 | 1.258384  | C                   | -4.092247 | 0.690113  | 0.389534  | N                   | -3.057035 | -2.340767 | -0.954814 |
| C                                                  | -3.810077 | 0.217558  | 0.370638  | O                   | -4.079083 | 1.293403  | 1.434074  | C                   | -2.417307 | -1.082116 | -0.652649 |
| O                                                  | -3.909765 | 0.840984  | 1.398544  | S                   | -1.409131 | -2.539146 | 1.105263  | H                   | -2.315246 | -0.510899 | -1.584442 |
| S                                                  | -0.569909 | -2.408514 | 1.185130  | O                   | -3.930868 | 1.283361  | -0.811731 | C                   | -3.196607 | -0.195266 | 0.351580  |
| O                                                  | -3.766376 | 0.797903  | -0.846848 | H                   | -4.605662 | -2.984802 | -1.171830 | C                   | -1.019639 | -1.331413 | -0.092402 |
| H                                                  | -3.598113 | -3.527066 | -1.104765 | H                   | -3.406955 | -3.454083 | -0.141984 | H                   | -4.221403 | -0.091367 | -0.027195 |
| H                                                  | -2.351909 | -3.732742 | -0.045026 | C                   | -3.759687 | 2.703009  | -0.770973 | H                   | -3.237288 | -0.678496 | 1.330363  |
| C                                                  | -3.877180 | 2.224112  | -0.843520 | H                   | -2.795188 | 2.956296  | -0.327260 | C                   | -2.647677 | 1.198185  | 0.536767  |

|         |           |           |           |         |           |           |           |         |           |           |           |
|---------|-----------|-----------|-----------|---------|-----------|-----------|-----------|---------|-----------|-----------|-----------|
| O       | -2.451553 | 1.742947  | 1.594749  | C       | -1.473507 | 1.740021  | 0.619565  | C       | 2.603163  | 2.806948  | 0.743090  |
| S       | -0.698090 | -2.575022 | 0.959596  | O       | -1.146502 | 2.043934  | 1.739956  | H       | 1.641490  | 3.031839  | 0.278698  |
| O       | -2.419852 | 1.789168  | -0.655087 | S       | -1.409813 | -2.504922 | 0.725194  | H       | 2.598876  | 3.130085  | 1.783714  |
| H       | -4.049184 | -2.201824 | -1.111953 | O       | -0.885006 | 2.245367  | -0.486262 | H       | 3.403870  | 3.300190  | 1.87936   |
| H       | -2.941497 | -2.966585 | -0.160438 | H       | -4.127326 | -0.549022 | -1.374645 | N       | 0.157133  | -0.364416 | 0.352845  |
| C       | -1.951970 | 3.139422  | -0.582572 | H       | -3.501357 | -1.802396 | -0.504481 | H       | 0.532653  | 0.319468  | 1.002741  |
| H       | -0.945887 | 3.171449  | -0.161091 | C       | 0.162019  | 3.187871  | 0.318688  | C       | -1.128233 | -0.036435 | -0.223693 |
| H       | -1.937429 | 3.500665  | -1.610392 | H       | 1.027121  | 2.688148  | 0.201870  | H       | -1.096033 | -0.282837 | -1.292133 |
| H       | -2.625672 | 3.742138  | 0.030148  | H       | 0.426043  | 3.597661  | -1.213027 | C       | -2.271915 | -0.858818 | 0.430279  |
| N       | -0.115693 | -0.423002 | -0.473829 | H       | -0.185203 | 3.975435  | 0.433111  | C       | -1.304363 | 1.459406  | -0.058195 |
| H       | -0.397312 | 0.349571  | -1.070675 | N       | 0.139229  | -0.713000 | -0.441490 | H       | -1.880693 | -1.884862 | 0.430286  |
| C       | 1.236692  | -0.354884 | 0.027842  | H       | 0.276726  | 0.139749  | -0.975476 | C       | -2.517781 | -0.429391 | 1.873958  |
| H       | 1.243778  | -0.646909 | 1.084748  | C       | 1.323663  | -1.292694 | 0.123872  | C       | -3.540204 | -0.856060 | -0.427642 |
| C       | 2.136957  | -1.325657 | -0.755466 | C       | 2.499427  | -0.403955 | -0.196054 | O       | -0.652946 | 2.138338  | 0.708149  |
| C       | 1.687845  | 1.086962  | -0.119061 | H       | 1.223371  | -1.401902 | 1.211712  | H       | -2.984619 | 0.561798  | 1.925828  |
| H       | 1.670704  | -2.309087 | -0.669001 | H       | 1.501225  | -2.304092 | -0.262662 | H       | -3.181323 | -1.133337 | 2.382391  |
| H       | 2.161605  | -1.030948 | -1.808609 | O       | 2.418592  | 0.649150  | -0.790234 | H       | -1.584646 | -0.392719 | 2.444440  |
| S       | 3.830992  | -1.422099 | -0.073106 | O       | 3.632075  | -0.926922 | 0.262909  | H       | -3.971506 | 0.151505  | -0.452110 |
| O       | 1.126205  | 1.901597  | -0.820286 | C       | 4.807050  | -0.147703 | 0.022486  | H       | -3.258695 | -1.094880 | -1.461041 |
| H       | 4.038028  | -2.696791 | -0.444480 | H       | 4.724597  | 0.826937  | 0.508820  | C       | -4.589936 | -1.856211 | 0.043215  |
| O       | 2.780769  | 1.329150  | 0.590996  | H       | 5.630293  | -0.719348 | 0.447944  | H       | -4.978170 | -1.607775 | 1.035789  |
| C       | 3.328615  | 2.644417  | 0.458372  | H       | 4.954275  | 0.000482  | -1.049561 | H       | -5.441519 | -1.876420 | -0.643423 |
| H       | 4.229689  | 2.647350  | 1.068855  |         |           |           |           | H       | -4.177398 | -2.869958 | 0.089333  |
| H       | 3.568838  | 2.853149  | -0.586200 | 9       |           |           |           | O       | -2.268881 | 1.940022  | -0.838750 |
| H       | 2.614944  | 3.388110  | 0.819577  | 'AspGln |           |           |           | C       | -2.509877 | 3.344672  | -0.717790 |
|         |           |           |           | N       | -2.526593 | -3.091899 | -1.007199 | H       | -3.329346 | 3.561445  | -1.401279 |
| 7       |           |           |           | C       | -2.390355 | -1.686603 | -0.704100 | H       | -2.784468 | 3.600333  | 0.308021  |
| 'AspPhe |           |           |           | H       | -2.425085 | -1.122488 | -1.644993 | H       | -1.617307 | 3.908387  | -0.998236 |
| N       | -3.413384 | -2.731811 | -1.053147 | C       | -3.502640 | -1.122517 | 0.216473  |         |           |           |           |
| C       | -3.011872 | -1.393279 | -0.689985 | C       | -1.039831 | -1.425998 | -0.043399 | 11      |           |           |           |
| H       | -3.067599 | -0.758477 | -1.583828 | H       | -4.468131 | -1.372151 | -0.241482 | 'AspHis |           |           |           |
| C       | -3.895853 | -0.735393 | 0.400287  | H       | -3.451549 | -1.593842 | 1.200503  | N       | -3.615074 | -2.515171 | -0.685400 |
| C       | -1.566381 | -1.396209 | -0.199893 | C       | -3.469180 | 0.373651  | 0.408293  | C       | -2.857953 | -1.289475 | -0.712985 |
| H       | -4.938530 | -0.802172 | 0.064690  | O       | -3.516976 | 0.950541  | 1.466696  | H       | -2.660995 | -1.023947 | -1.760815 |
| H       | -3.798694 | -1.278742 | 1.342860  | S       | -0.402426 | -2.459277 | 1.093753  | C       | -3.581627 | -0.081970 | -0.058358 |
| C       | -3.602089 | 0.721059  | 0.663612  | O       | -3.397052 | 1.009022  | -0.779787 | C       | -1.515068 | -1.477026 | -0.007846 |
| O       | -3.436858 | 1.222003  | 1.748302  | H       | -3.490235 | -3.310013 | -1.235733 | H       | -4.556861 | 0.024636  | -0.550426 |
| S       | -0.960604 | -2.617110 | 0.752353  | H       | -2.260328 | -3.631318 | -0.186057 | H       | -3.748996 | -0.277634 | 1.003108  |
| O       | -3.566301 | 1.420829  | -0.490176 | C       | -3.405497 | 2.437544  | -0.705178 | C       | -2.874583 | 1.244617  | -0.179224 |
| H       | -4.421355 | -2.781766 | -1.152116 | H       | -2.490276 | 2.799046  | -0.233341 | O       | -2.697292 | 2.029748  | 0.721038  |
| H       | -3.130107 | -3.371668 | -0.313855 | H       | -3.456068 | 2.785186  | -1.736567 | S       | -1.351353 | -2.415252 | 1.343302  |
| C       | -3.336495 | 2.825261  | -0.343664 | H       | -4.272165 | 2.783386  | -0.137659 | O       | -2.469473 | 1.475282  | -1.446600 |
| H       | -2.309309 | 3.010105  | -0.023635 | N       | -0.469954 | -0.276011 | -0.407196 | H       | -4.590471 | -2.338984 | -0.897629 |
| H       | -3.501318 | 3.254794  | -1.331454 | H       | -0.947099 | 0.343681  | -1.055072 | H       | -3.550667 | -2.922766 | 0.245206  |
| H       | -4.030294 | 3.250368  | 0.384474  | C       | 0.743099  | 0.245178  | 0.179192  | C       | -1.834956 | 2.742220  | -1.662188 |
| N       | -0.878244 | -0.306032 | -0.545257 | H       | 0.732768  | 0.003051  | 1.249702  | H       | -0.871611 | 2.781868  | -1.147439 |
| H       | -1.324811 | 0.421098  | -1.095994 | C       | 2.001979  | -0.373357 | -0.464513 | H       | -1.694761 | 2.819814  | -2.740000 |
| C       | 0.468523  | -0.017185 | -0.111913 | C       | 0.704747  | 1.749096  | -0.000641 | H       | -2.471141 | 3.551744  | -1.298995 |
| H       | 0.597203  | -0.389940 | 0.909716  | H       | 1.755883  | -1.414419 | -0.693662 | N       | -0.532874 | -0.750106 | -0.567831 |
| C       | 1.504035  | -0.709621 | -1.033838 | H       | 2.236694  | 0.120683  | -1.412623 | H       | -0.779872 | -0.190805 | -1.375872 |
| C       | 0.627461  | 1.488886  | -0.136647 | C       | 3.225173  | -0.336240 | 0.439993  | C       | 0.805745  | -0.560094 | -0.037694 |
| H       | 1.175460  | -1.751693 | -1.110996 | O       | -0.069990 | 2.327113  | -0.732424 | H       | 0.941552  | -1.298925 | 0.756842  |
| H       | 1.431710  | -0.265579 | -2.032796 | H       | 3.381692  | 0.677740  | 0.827307  | C       | 1.843719  | -0.735408 | -1.150192 |
| C       | 2.918138  | -0.653368 | -0.523586 | H       | 3.071845  | -0.990184 | 1.306560  | C       | 0.835055  | 0.842730  | 0.567634  |
| O       | -0.054848 | 2.225135  | -0.820034 | C       | 4.481794  | -0.713733 | -0.327668 | H       | 1.711781  | -1.738260 | -1.566037 |
| C       | 3.878014  | 0.152616  | -1.137764 | O       | 4.652326  | -0.401514 | -1.494177 | H       | 1.622865  | -0.018688 | -1.952395 |
| C       | 3.291957  | -1.417847 | 0.585987  | N       | 5.422199  | -1.378804 | 0.393471  | C       | 3.257904  | -0.585123 | -0.706032 |
| H       | 3.601883  | 0.744240  | -2.008010 | H       | 6.262330  | -1.666203 | -0.081537 | O       | 1.221219  | 1.832316  | -0.028827 |
| C       | 5.183206  | 0.198902  | -0.655410 | H       | 5.237691  | -1.734369 | 1.314891  | N       | 3.830161  | 0.630943  | -0.412179 |
| C       | 4.593705  | -1.370438 | 1.072242  | O       | 1.642733  | 2.358760  | 0.721209  | C       | 4.269305  | -1.495613 | -0.517132 |
| H       | 2.553610  | -2.058495 | 1.063772  | C       | 1.709103  | 3.779662  | 0.561739  | H       | 3.329588  | 1.508488  | -0.418124 |
| H       | 5.919833  | 0.826536  | -1.149149 | H       | 2.523915  | 4.108989  | 1.204506  | C       | 5.121515  | 0.399354  | -0.064515 |
| C       | 5.543659  | -0.561018 | 0.453055  | H       | 1.911365  | 4.037387  | -0.479997 | N       | 5.423762  | -0.876764 | -0.119272 |
| H       | 4.869653  | -1.972107 | 1.933577  | H       | 0.767312  | 4.239782  | 0.868393  | H       | 4.220961  | -2.567759 | -0.656075 |
| H       | 6.561713  | -0.527909 | 0.830180  |         |           |           |           | H       | 5.796122  | 1.196188  | 0.218458  |
| O       | 1.614706  | 1.893504  | 0.649947  | 10      |           |           |           | O       | 0.323665  | 0.853394  | 1.785593  |
| C       | 1.885146  | 3.297039  | 0.628416  | 'AspIle |           |           |           | C       | 0.164732  | 2.140232  | 2.398149  |
| H       | 2.740866  | 3.439610  | 1.286092  | N       | 2.667351  | -2.792816 | 0.910861  | H       | -0.081516 | 1.935773  | 3.438672  |
| H       | 2.119792  | 3.626122  | -0.386265 | C       | 2.291589  | -1.426150 | 0.631682  | H       | 1.090116  | 2.714106  | 2.322099  |
| H       | 1.020846  | 3.856132  | 0.994212  | H       | 2.225472  | -0.882742 | 1.583091  | H       | -0.653950 | 2.674287  | 1.912025  |
|         |           |           |           | C       | 3.293734  | -0.662333 | -0.270153 |         |           |           |           |
| 8       |           |           |           | C       | 0.917606  | -1.391450 | -0.033040 | 12      |           |           |           |
| 'AspGly |           |           |           | H       | 4.288245  | -0.761555 | 0.183314  | 'AspLeu |           |           |           |
| N       | -3.299652 | -1.116368 | -1.229286 | H       | 3.320611  | -1.109486 | -1.266400 | N       | -2.732186 | -2.842034 | -0.885524 |
| C       | -2.196147 | -0.293892 | -0.794654 | C       | 3.019338  | 0.813571  | -0.423103 | C       | -2.366305 | -1.467768 | -0.633770 |
| H       | -1.784417 | 0.230947  | -1.666677 | O       | 2.997869  | 1.422615  | -1.464082 | H       | -2.358066 | -0.929161 | -1.590206 |
| C       | -2.580182 | 0.782133  | 0.253837  | S       | 0.475332  | -2.498123 | -1.191815 | C       | -3.333871 | -0.713933 | 0.313632  |
| C       | -1.093266 | -1.166862 | -0.203819 | O       | 2.819973  | 1.393548  | 0.779224  | C       | -0.961350 | -1.404069 | -0.039780 |
| H       | -3.402182 | 1.375629  | -0.166275 | H       | 3.655031  | -2.846157 | 1.134953  | H       | -4.348249 | -0.831613 | -0.088340 |
| H       | -2.930806 | 0.304350  | 1.171482  | H       | 2.495930  | -3.354403 | 0.079197  | H       | -3.302608 | -1.154491 | 1.312674  |

|         |           |           |           |         |           |           |           |           |           |
|---------|-----------|-----------|-----------|---------|-----------|-----------|-----------|-----------|-----------|
| C       | -3.072734 | 0.766654  | 0.442198  |         |           | H         | -4.487866 | -1.871672 | -0.193805 |
| O       | -2.990695 | 1.381789  | 1.476605  | 14      |           |           |           |           |           |
| S       | -0.435244 | -2.502365 | 1.091912  | 'AspMet |           | 16        |           |           |           |
| O       | -2.961081 | 1.342327  | -0.773410 | N       | -2.662609 | -3.123399 | -0.891282 | 'AspSer   |           |
| H       | -3.729789 | -2.914935 | -1.052643 | C       | -2.503725 | -1.711770 | -0.634007 | N         | -3.363877 |
| H       | -2.502166 | -3.396819 | -0.063477 | H       | -2.563026 | -1.174203 | -1.589371 | C         | -2.406049 |
| C       | -2.757827 | 2.758096  | -0.758796 | C       | -3.580810 | -1.109116 | 0.304603  | H         | -2.184797 |
| H       | -1.770079 | 2.995938  | -0.359862 | C       | -1.131177 | -1.445279 | -0.022385 | C         | -2.894487 |
| H       | -2.826144 | 3.075451  | -1.798994 | H       | -4.562581 | -1.366047 | -0.112649 | C         | -1.105902 |
| H       | -3.525256 | 3.246367  | -0.154413 | H       | -3.499015 | -1.548270 | 1.301303  | H         | -3.868796 |
| N       | -0.246058 | -0.359397 | -0.461079 | C       | -3.530515 | 0.392298  | 0.443971  | H         | -3.027490 |
| H       | -0.655260 | 0.298052  | -1.117487 | O       | -3.523462 | 1.005777  | 1.482656  | C         | -1.996509 |
| C       | 1.071424  | -0.012024 | 0.026724  | S       | -0.460965 | -2.454803 | 1.114333  | O         | -1.630084 |
| H       | 1.131858  | -0.305929 | 1.079664  | O       | -3.513238 | 0.985840  | -0.767761 | S         | -1.089756 |
| C       | 2.155207  | -0.754042 | -0.781156 | H       | -3.635932 | -3.340229 | -1.075402 | O         | -1.663734 |
| C       | 1.198377  | 1.492037  | -0.095100 | H       | -2.367039 | -3.642250 | -0.066889 | H         | -4.291835 |
| H       | 1.878748  | -1.814842 | -0.737543 | C       | -3.517738 | 2.416100  | -0.743407 | H         | -3.378266 |
| H       | 2.067424  | -0.442455 | -1.830024 | H       | -2.577777 | 2.792902  | -0.336370 | C         | -0.854867 |
| C       | 3.604537  | -0.596872 | -0.310322 | H       | -3.626358 | 2.727096  | -1.782065 | H         | 0.151037  |
| O       | 0.539136  | 2.167946  | -0.856853 | H       | -4.351481 | 2.783402  | -0.141123 | H         | -0.815474 |
| H       | 3.889872  | 0.460424  | -0.395217 | N       | -0.569285 | -0.304210 | -0.429937 | H         | -1.303739 |
| C       | 3.790976  | -1.022699 | 1.144437  | H       | -1.064107 | 0.300656  | -1.078313 | N         | -0.012463 |
| C       | 4.516450  | -1.404249 | -1.232935 | C       | 0.660314  | 0.230306  | 0.107692  | H         | -0.105178 |
| H       | 3.421062  | -2.042043 | 1.303951  | H       | 0.701464  | -0.014086 | 1.176601  | C         | 1.330101  |
| H       | 4.850749  | -1.002747 | 1.418824  | C       | 1.891955  | -0.384666 | -0.592077 | H         | 1.296697  |
| H       | 3.263086  | -0.359631 | 1.835784  | C       | 0.595197  | 1.734468  | -0.069813 | C         | 1.979376  |
| H       | 4.404668  | -1.099438 | -2.278999 | H       | 1.678533  | -1.451512 | -0.709649 | C         | 2.097192  |
| H       | 5.567486  | -1.275058 | -0.955824 | H       | 1.991178  | 0.043595  | -1.596828 | H         | 1.364483  |
| H       | 4.285010  | -2.473961 | -1.170557 | C       | 3.182489  | -0.220574 | 0.197613  | H         | 1.929910  |
| O       | 2.133909  | 1.980707  | 0.715670  | O       | -0.178513 | 2.294927  | -0.816581 | O         | 3.301878  |
| C       | 2.339473  | 3.393837  | 0.631718  | H       | 3.389914  | 0.833653  | 0.403562  | O         | 1.844995  |
| H       | 3.142435  | 3.615640  | 1.332875  | H       | 3.093343  | -0.747355 | 1.155046  | H         | 3.642744  |
| H       | 2.622629  | 3.680693  | -0.383423 | S       | 4.562155  | -0.929286 | -0.749968 | O         | 3.061676  |
| H       | 1.427896  | 3.926470  | 0.911679  | C       | 5.897893  | -0.662645 | 0.437559  | C         | 3.870355  |
|         |           |           |           | H       | 5.718267  | -1.209414 | 1.367360  | H         | 4.620467  |
| 13      |           |           |           | H       | 6.814066  | -1.043243 | -0.018974 | H         | 4.344080  |
| 'AspLys |           |           |           | H       | 6.032560  | 0.400522  | 0.655910  | H         | 3.263513  |
| N       | -2.662815 | -3.206399 | -0.872615 | O       | 1.501474  | 2.364556  | 0.673471  |           |           |
| C       | -2.536909 | -1.786898 | -0.641150 | C       | 1.524189  | 3.788802  | 0.532328  | 17        |           |
| H       | -2.579608 | -1.269950 | -1.608810 | H       | 2.323110  | 4.135255  | 1.185932  | 'AspTyr   |           |
| C       | -3.650928 | -1.185807 | 0.254551  | H       | 1.724470  | 4.067384  | -0.504467 | N         | -3.694062 |
| C       | -1.187466 | -1.480622 | 0.003601  | H       | 0.566105  | 4.214489  | 0.838330  | C         | -3.309332 |
| H       | -4.616034 | -1.474242 | -0.180609 |         |           |           |           | H         | -3.396915 |
| H       | -3.584867 | -1.598353 | 1.263717  | 15      |           |           |           | C         | -4.180596 |
| C       | -3.635678 | 0.319349  | 0.357054  | 'AspPro |           |           |           | C         | -1.853121 |
| O       | -3.660883 | 0.958591  | 1.379860  | N       | 0.290578  | -1.513759 | -2.280659 | H         | -5.229446 |
| S       | -0.529420 | -2.458691 | 1.175232  | C       | 0.689422  | -0.925123 | -1.012389 | H         | -4.050634 |
| O       | -3.608469 | 0.882706  | -0.868837 | H       | 0.069048  | -1.374321 | -0.231513 | C         | -3.912192 |
| H       | -3.628542 | -3.446708 | -1.067300 | C       | 2.133552  | -1.328868 | -0.727237 | O         | -3.742163 |
| H       | -2.370581 | -3.701114 | -0.032154 | C       | 0.525790  | 0.602007  | -1.004055 | S         | -1.203092 |
| C       | -3.638594 | 2.312719  | -0.881453 | H       | 2.205042  | -2.415801 | -0.849550 | O         | -3.907296 |
| H       | -2.704358 | 2.716082  | -0.486468 | H       | 2.799717  | -0.878648 | -1.469371 | H         | -4.703132 |
| H       | -3.754122 | 2.594781  | -1.927691 | C       | 2.692857  | -0.986151 | 0.627267  | H         | -3.378978 |
| H       | -4.477707 | 2.680857  | -0.287275 | O       | 3.860721  | -1.050335 | 0.921216  | C         | -3.704280 |
| N       | -0.641769 | -0.333677 | -0.406371 | S       | 1.462169  | 1.527982  | -0.209455 | H         | -2.677876 |
| H       | -1.127390 | 0.241205  | -1.087853 | O       | 1.738488  | -0.626222 | 1.515837  | H         | -3.887696 |
| C       | 0.563876  | 0.242620  | 0.147435  | H       | -0.689929 | -1.297330 | -2.443619 | H         | -4.399146 |
| H       | 0.599817  | 0.001453  | 1.216516  | H       | 0.812425  | -1.041435 | -3.016757 | N         | -1.193703 |
| C       | 1.820496  | -0.333775 | -0.535557 | C       | 2.235546  | -0.308064 | 2.814655  | H         | -1.666985 |
| C       | 0.447895  | 1.742217  | -0.034152 | H       | 2.948781  | 0.517799  | 2.761515  | C         | 0.158142  |
| H       | 1.671747  | -1.418883 | -0.560519 | H       | 1.365813  | -0.025671 | 3.408521  | H         | 0.320759  |
| H       | 1.847745  | 0.011348  | -1.577381 | H       | 2.735924  | -1.172108 | 3.258375  | C         | 1.182724  |
| C       | 3.135147  | -0.025916 | 0.171430  | N       | -0.402439 | 1.136803  | -0.198132 | C         | 0.285368  |
| O       | -0.287711 | 2.270815  | -0.841527 | C       | -0.597401 | 2.582450  | -0.083280 | H         | 0.871276  |
| H       | 3.302023  | 1.056913  | 0.215543  | C       | -1.294488 | 0.400543  | 0.695168  | H         | 1.070987  |
| H       | 3.066562  | -0.368229 | 1.212880  | H       | -1.229371 | 2.937260  | -0.907697 | C         | 2.609328  |
| C       | 4.321321  | -0.702467 | -0.507216 | H       | 0.368812  | 3.082933  | -0.172146 | O         | -0.422813 |
| H       | 4.175474  | -1.788680 | -0.540151 | C       | -1.269211 | 2.739312  | 1.272832  | C         | 3.538299  |
| H       | 4.383433  | -0.367838 | -1.553487 | C       | -2.149851 | 1.498257  | 1.361813  | C         | 3.040598  |
| C       | 5.645608  | -0.415503 | 0.186481  | H       | -0.715115 | -0.151448 | 1.442829  | H         | 3.232946  |
| H       | 5.783404  | 0.680119  | 0.256629  | C       | -2.201525 | -0.567858 | -0.043800 | C         | 4.857313  |
| H       | 5.592436  | -0.784010 | 1.218806  | H       | -1.837103 | 3.669072  | 1.354996  | C         | 4.349599  |
| N       | 6.734434  | -1.114131 | -0.481472 | H       | -0.514178 | 2.731076  | 2.066634  | H         | 2.334537  |
| H       | 6.873014  | -0.724392 | -1.409014 | H       | -3.066546 | 1.652886  | 0.781605  | H         | 5.568446  |
| H       | 7.603696  | -0.967782 | 0.020628  | H       | -2.436770 | 1.219326  | 2.377580  | C         | 5.266993  |
| O       | 1.261636  | 2.409855  | 0.779536  | O       | -2.464198 | -0.530164 | -1.222280 | H         | 4.684616  |
| C       | 1.229223  | 3.833376  | 0.642991  | O       | -2.715409 | -1.452917 | 0.815831  | O         | 6.537131  |
| H       | 1.964678  | 4.212648  | 1.350750  | C       | -3.632497 | -2.390572 | 0.244805  | H         | 7.065203  |
| H       | 1.486232  | 4.127370  | -0.377034 | H       | -3.139151 | -2.979852 | -0.531362 | O         | 1.276263  |
| H       | 0.234185  | 4.214414  | 0.883433  | H       | -3.951186 | -3.029585 | 1.067076  | C         | 1.511500  |

|                     |           |           |           |                     |           |           |           |                     |           |           |           |
|---------------------|-----------|-----------|-----------|---------------------|-----------|-----------|-----------|---------------------|-----------|-----------|-----------|
| H                   | 1.724627  | 3.689179  | -0.411963 | H                   | 5.180944  | 1.681933  | -1.458213 | C                   | 1.786691  | 1.410836  | -0.797386 |
| H                   | 0.638572  | 3.876886  | 0.984605  | C                   | 5.538660  | -0.324944 | 0.564437  | H                   | 2.263469  | -1.951771 | -0.261615 |
| H                   | 2.371644  | 3.500105  | 1.250511  | C                   | 5.302096  | -1.384714 | 1.425492  | H                   | 2.884815  | -0.969707 | -1.612736 |
| 18                  |           |           |           | H                   | 3.898567  | -2.842608 | 2.169300  | C                   | 3.877787  | -0.665912 | 0.235209  |
| <sup>1</sup> AspThr |           |           |           | H                   | 6.511836  | 0.155806  | 0.517326  | O                   | 1.206440  | 1.937471  | -1.721097 |
| N                   | 3.200655  | -2.246500 | -0.095926 | H                   | 6.105061  | -1.739030 | 2.065251  | O                   | 4.986558  | -0.586046 | -0.235221 |
| C                   | 2.235892  | -1.229095 | 0.252683  | O                   | 0.862173  | 2.123603  | 0.749991  | O                   | 2.796770  | 1.957480  | -0.130392 |
| H                   | 2.160581  | -1.186245 | 1.346441  | O                   | 0.927112  | 3.533588  | 0.970725  | C                   | 3.217526  | 3.243232  | -0.599529 |
| C                   | 2.755603  | 0.134903  | -0.219804 | H                   | 1.078967  | 4.062296  | 0.026939  | H                   | 4.051269  | 3.529056  | 0.039374  |
| C                   | 0.818329  | -1.443234 | -0.306940 | H                   | 0.004001  | 3.889766  | 1.433873  | H                   | 3.535608  | 3.181322  | -1.642224 |
| H                   | 3.835854  | 0.154660  | -0.031926 | H                   | 1.773695  | 3.686453  | 1.638068  | C                   | 2.400437  | 3.962750  | -0.515335 |
| H                   | 2.617371  | 0.262817  | -1.298119 | 20                  |           |           |           | O                   | 3.607390  | -0.541303 | 1.542286  |
| C                   | 2.137471  | 1.300915  | 0.505992  | <sup>1</sup> AspVal |           |           |           | C                   | 4.736677  | -0.262944 | 2.366696  |
| O                   | 1.517470  | 1.224872  | 1.549051  | N                   | 3.104938  | -2.154716 | 0.903025  | H                   | 5.196506  | 0.685505  | 2.077615  |
| S                   | 0.555613  | -2.328437 | -1.691462 | C                   | 2.374579  | -0.939839 | 0.626025  | H                   | 4.354316  | -0.207913 | 3.385285  |
| O                   | 2.386176  | 2.451045  | -0.115194 | H                   | 2.172367  | -0.431241 | 1.577554  | H                   | 5.482707  | -1.056274 | 2.279026  |
| H                   | 2.903675  | -3.131163 | 0.305760  | C                   | 3.128046  | 0.062660  | -0.284855 | 22                  |           |           |           |
| H                   | 3.148543  | -2.394885 | -1.103073 | C                   | 1.037112  | -1.275066 | -0.029001 | <sup>1</sup> GluGlu |           |           |           |
| C                   | 1.778731  | 3.601360  | 0.476003  | H                   | 4.115370  | 0.236612  | 0.161451  | N                   | 1.542079  | -3.282332 | 1.361282  |
| H                   | 2.114462  | 3.728958  | 1.507680  | H                   | 3.265895  | -0.364658 | -1.280571 | C                   | 1.694952  | -1.864522 | 1.106483  |
| H                   | 2.091991  | 4.446011  | -0.136682 | C                   | 2.461965  | 1.407944  | -0.435849 | H                   | 1.660950  | -1.347765 | 2.078534  |
| H                   | 0.692153  | 3.492904  | 0.458584  | O                   | 2.243656  | 1.974684  | -1.478114 | C                   | 3.070764  | -1.622357 | 0.481670  |
| N                   | -0.135525 | -0.829754 | 0.400765  | S                   | 0.900005  | -2.460110 | -1.186464 | C                   | 0.592580  | -1.270596 | 0.222005  |
| H                   | 0.162277  | -0.209348 | 1.153653  | O                   | 2.150437  | 3.192757  | 0.770101  | H                   | 3.817453  | -2.058439 | 1.150796  |
| C                   | -1.500688 | -0.690305 | -0.026208 | H                   | 4.071648  | -1.940378 | 1.122248  | H                   | 3.124303  | -2.179206 | -0.460450 |
| H                   | -1.687504 | -1.449056 | -0.795407 | H                   | 3.086790  | -2.743153 | 0.072469  | C                   | 3.384769  | -0.158104 | 0.223968  |
| C                   | -2.467564 | -0.894057 | 1.142782  | C                   | 1.559852  | 3.229940  | 0.735532  | H                   | 2.713648  | 0.276973  | -0.525755 |
| C                   | -1.691975 | 0.678530  | -0.674334 | H                   | 0.561047  | 3.128731  | 0.298280  | H                   | 3.254057  | 0.449534  | 1.130093  |
| H                   | -3.482430 | -0.741405 | 0.747616  | H                   | 1.497418  | 3.551769  | 1.774737  | C                   | 4.801560  | 0.046877  | -0.250406 |
| C                   | -2.356666 | -2.283183 | 1.746761  | H                   | 2.182872  | 3.914379  | 0.155814  | O                   | 5.652540  | -0.807144 | -0.320880 |
| O                   | -2.138807 | 0.120810  | 2.075698  | N                   | 0.032267  | -0.487392 | 0.361643  | S                   | 0.168666  | -1.964967 | -1.229605 |
| O                   | -0.829041 | 1.509397  | -0.818359 | H                   | 0.213704  | 0.270229  | 1.012975  | O                   | 5.012055  | 1.331862  | -0.586035 |
| H                   | -1.342304 | -2.463885 | 2.112008  | C                   | -1.295227 | -0.508413 | -0.212323 | H                   | 0.641536  | -3.459220 | 1.796814  |
| H                   | -3.052636 | -2.390110 | 2.586396  | H                   | -1.202210 | -0.744265 | -1.279493 | H                   | 1.512800  | -3.759279 | 0.462076  |
| H                   | -2.603807 | -3.053254 | 1.010210  | C                   | -2.183371 | -1.596657 | 0.448441  | C                   | 6.334026  | 1.623297  | -1.033659 |
| H                   | -2.651959 | -0.023248 | 2.876565  | C                   | -1.855581 | 0.890182  | -0.051675 | H                   | 6.343840  | 2.689422  | -1.259206 |
| O                   | -2.954977 | 0.828983  | -1.090396 | H                   | -1.549117 | -2.491334 | 0.424734  | H                   | 7.066353  | 1.390069  | -0.256556 |
| C                   | -3.234840 | 2.076848  | -1.724659 | C                   | -2.507621 | -1.267204 | 1.902149  | H                   | 6.577005  | 1.041523  | -1.926396 |
| H                   | -4.283971 | 2.033677  | -2.014988 | C                   | -3.436532 | -1.894967 | -0.366757 | N                   | 0.030719  | -0.161671 | 0.709266  |
| H                   | -3.061905 | 2.904726  | -1.032827 | O                   | -1.405620 | 1.716370  | 0.714926  | H                   | 0.368912  | 0.242298  | 1.576886  |
| H                   | -2.598427 | 2.210672  | -2.602428 | H                   | -3.169122 | -0.396395 | 1.983255  | C                   | -0.984313 | 0.618533  | 0.038807  |
| 19                  |           |           |           | H                   | -3.017803 | -2.110885 | 2.376132  | H                   | -0.766628 | 0.622066  | -1.036601 |
| <sup>1</sup> AspTrp |           |           |           | H                   | -1.603071 | -1.059313 | 2.481902  | C                   | -2.386261 | 0.016187  | 0.261478  |
| N                   | -3.663053 | -2.836965 | -1.287685 | H                   | -3.184639 | -2.150353 | -1.400807 | C                   | -0.873103 | 2.025995  | 0.595052  |
| C                   | -3.380291 | -1.517726 | -0.774096 | H                   | -3.967362 | -2.747167 | 0.068513  | H                   | -2.288325 | -1.061431 | 0.107765  |
| H                   | -3.605001 | -0.782523 | -1.557764 | H                   | -4.122932 | -1.043710 | -0.385715 | H                   | -2.681740 | 0.173798  | 1.305761  |
| C                   | -4.210294 | -1.128426 | 0.476158  | O                   | -2.910527 | 1.101486  | -0.834688 | C                   | -3.444164 | 0.559886  | -0.693535 |
| C                   | -1.899046 | -1.398305 | -0.423063 | C                   | -3.507917 | 2.395892  | -0.717734 | O                   | -0.292369 | 2.297548  | 1.623452  |
| H                   | -5.268042 | -1.292592 | 0.234297  | H                   | -4.355989 | 2.390271  | -1.400672 | H                   | -3.553095 | 1.643133  | -0.022782 |
| H                   | -3.943544 | -1.767922 | 1.320611  | H                   | -3.838448 | 2.574847  | 0.307779  | H                   | -3.144150 | 0.332536  | -1.725444 |
| C                   | -4.069148 | 0.309743  | 0.911167  | H                   | -2.792335 | 3.170858  | -1.001349 | C                   | -4.818554 | -0.029988 | -0.491383 |
| O                   | -3.846913 | 0.688437  | 2.034563  | 21                  |           |           |           | O                   | -5.852375 | 0.589628  | -0.572340 |
| S                   | -1.056018 | -2.652958 | 0.269923  | <sup>1</sup> GluAsp |           |           |           | O                   | -1.505356 | 2.916258  | -0.165549 |
| O                   | -4.248646 | 1.147328  | -0.132209 | N                   | -2.171999 | -2.863664 | -1.702298 | C                   | -1.483382 | 4.262426  | 0.322706  |
| H                   | -4.662710 | -3.006951 | -1.290180 | C                   | -1.854333 | -1.491624 | -1.365723 | H                   | -2.043501 | 4.846900  | -0.405299 |
| H                   | -3.220160 | -3.525847 | -0.682974 | H                   | -1.695303 | -0.946520 | -2.309000 | H                   | -1.952974 | 4.319186  | 1.307021  |
| C                   | -4.178159 | 2.540369  | 1.585983  | C                   | -3.059772 | -0.873037 | -0.649891 | H                   | -0.454742 | 4.621321  | 0.397170  |
| H                   | -3.151146 | 2.823120  | 0.425164  | C                   | -0.590759 | -1.332059 | -0.512201 | O                   | -4.764976 | -1.347629 | -0.235934 |
| H                   | -4.509050 | 3.063855  | -0.710671 | H                   | -3.920447 | -1.009161 | -1.312610 | C                   | -6.033201 | -1.980449 | -0.075431 |
| H                   | -4.829401 | 2.770839  | 1.031594  | H                   | -3.254900 | -1.450098 | 0.259902  | H                   | -5.818341 | -3.028730 | 0.129549  |
| N                   | -1.388528 | -0.187566 | -0.654678 | C                   | -2.881197 | 0.599106  | -0.290777 | H                   | -6.586202 | -1.531826 | 0.753468  |
| H                   | -1.977158 | 0.538395  | -1.051906 | H                   | -2.078617 | 0.706538  | 0.451179  | H                   | -6.629584 | -1.882670 | -0.985838 |
| C                   | -0.046276 | 0.224870  | -0.311930 | H                   | -2.601513 | 1.203115  | -1.159281 | 23                  |           |           |           |
| H                   | 0.259536  | -0.290215 | 0.603496  | C                   | -4.109721 | 1.247122  | 0.298483  | <sup>1</sup> GluAla |           |           |           |
| C                   | 0.940612  | -0.130213 | -1.454138 | O                   | -4.497269 | 2.361660  | 0.039124  | N                   | 1.287699  | 3.094386  | -1.146818 |
| C                   | -0.093383 | 1.719067  | -0.074983 | S                   | -0.337382 | -2.248378 | 0.851891  | C                   | 0.887875  | 1.719706  | -0.928293 |
| H                   | 0.797891  | -1.200805 | -1.641827 | O                   | -4.720273 | 0.440640  | 1.182784  | H                   | 0.647734  | 1.283099  | -1.910310 |
| H                   | 0.622257  | 0.404058  | -2.356414 | H                   | -1.402875 | -3.278595 | -2.220053 | C                   | 2.077550  | 0.950874  | -0.342232 |
| C                   | 2.370985  | 0.159562  | -1.150109 | H                   | -2.236767 | -3.390521 | -0.833123 | C                   | -0.342613 | 1.557809  | -0.027474 |
| O                   | -0.902142 | 2.455390  | -0.604048 | C                   | -5.876223 | 0.997591  | 1.804218  | H                   | 2.925047  | 1.112327  | -1.013127 |
| C                   | 3.151676  | 1.129030  | -1.721401 | H                   | -6.259698 | 0.222576  | 2.467230  | H                   | 2.329398  | 1.405018  | 0.623834  |
| C                   | 2.994642  | -1.592586 | 0.685377  | H                   | -5.614477 | 1.893115  | 2.373538  | C                   | 1.824245  | -0.543347 | -0.159336 |
| C                   | 3.203502  | -0.519217 | -0.193623 | H                   | -6.624939 | 1.267531  | 1.055436  | H                   | 1.024744  | -0.736513 | 0.559628  |
| H                   | 2.902035  | 1.844454  | -2.493532 | N                   | 0.253447  | -0.393373 | -0.948398 | H                   | 1.520520  | -0.990792 | -1.116454 |
| N                   | 4.413072  | 1.098803  | -1.176042 | H                   | 0.008488  | 0.174554  | -1.754113 | C                   | 3.027053  | -1.316498 | 0.323427  |
| C                   | 4.478161  | 0.096517  | -0.239157 | C                   | 1.464443  | 0.018969  | -0.280967 | O                   | 3.015221  | -2.141331 | 1.205682  |
| C                   | 4.044821  | -2.012438 | 1.484783  | H                   | 1.291195  | 0.049862  | 0.801628  | S                   | -0.486225 | 2.390575  | 1.405125  |
| H                   | 2.027475  | -2.088171 | 0.731526  | C                   | 2.624176  | -0.958162 | -0.552365 | O                   | 4.132334  | -0.999089 | -0.373759 |

|                     |           |           |           |                     |           |           |           |                     |           |           |           |
|---------------------|-----------|-----------|-----------|---------------------|-----------|-----------|-----------|---------------------|-----------|-----------|-----------|
| H                   | 0.523255  | 3.606740  | -1.577405 | H                   | -3.601072 | -1.167393 | -1.033961 | C                   | -0.920911 | -1.373628 | -0.397980 |
| H                   | 1.421923  | 3.525045  | -0.233339 | H                   | -2.839627 | -1.576468 | 0.505569  | H                   | -4.323381 | -1.206672 | -0.889548 |
| C                   | 5.307498  | -1.708203 | 0.011637  | C                   | -2.590481 | 0.488135  | -0.076108 | H                   | -3.471333 | -1.566614 | 0.614618  |
| H                   | 6.105399  | -1.332131 | -0.628189 | H                   | -1.751564 | 0.685003  | 0.595717  | C                   | -3.282180 | 0.485005  | -0.032653 |
| H                   | 5.541173  | -1.525501 | 1.063342  | H                   | -2.415027 | 1.069638  | -0.992745 | H                   | -2.404019 | 0.709019  | 0.577789  |
| H                   | 5.174688  | -2.783332 | -0.133659 | C                   | -3.810997 | 1.080114  | 0.586178  | H                   | -3.175723 | 1.043580  | -0.973734 |
| N                   | -1.245602 | 0.685156  | -0.479478 | O                   | -3.790006 | 1.854245  | 1.512880  | C                   | -4.464998 | 1.079219  | 0.692966  |
| H                   | -1.054651 | 0.152438  | -1.224249 | S                   | 0.110131  | -2.362888 | 0.942164  | O                   | -4.393522 | 1.875439  | 1.598403  |
| C                   | -2.430440 | 0.265587  | 0.234169  | O                   | -4.947550 | 0.667324  | -0.002633 | S                   | -0.511248 | -2.301496 | 0.922350  |
| H                   | -2.184902 | 0.201092  | 1.301974  | H                   | -1.039431 | -3.324226 | -2.073600 | O                   | -5.631061 | 0.640586  | 0.187723  |
| C                   | -3.599873 | 1.236753  | 0.056657  | H                   | -1.828521 | -3.483144 | -0.669343 | H                   | -1.793933 | -3.353656 | -2.025166 |
| C                   | -2.781195 | -1.116710 | -0.282582 | C                   | -6.141656 | 1.207477  | 0.558340  | H                   | -2.507876 | -3.492756 | -0.578150 |
| H                   | -3.871364 | 1.325995  | -0.999254 | H                   | -6.962047 | 0.768429  | -0.008851 | C                   | -6.794540 | 1.181455  | 0.809577  |
| H                   | -4.468173 | 0.885871  | 0.618589  | H                   | -6.223588 | 0.946061  | 1.616187  | H                   | -7.643090 | 0.718375  | 0.306657  |
| H                   | -3.304212 | 2.217404  | 0.434937  | H                   | -6.152841 | 2.296635  | 0.467446  | H                   | -6.806258 | 0.946733  | 1.876704  |
| O                   | -2.253032 | -1.637304 | -1.241181 | N                   | 0.540433  | -0.379000 | -0.769093 | H                   | -6.825627 | 2.267625  | 0.691774  |
| O                   | -3.753887 | -1.672937 | 0.434245  | H                   | 0.217165  | 0.226364  | -1.518217 | N                   | -0.164400 | -0.386974 | -0.882261 |
| C                   | -4.162969 | -2.973451 | 0.001267  | C                   | 1.725251  | 0.108441  | -0.100584 | H                   | -0.482945 | 0.157625  | -1.677807 |
| H                   | -4.952445 | -3.276520 | 0.687246  | H                   | 1.553477  | 0.168634  | 0.984357  | C                   | 1.093566  | 0.052417  | -0.324170 |
| H                   | -4.536997 | -2.934734 | -1.024253 | C                   | 2.941974  | -0.803189 | -0.291440 | H                   | 1.040609  | -0.015169 | 0.767377  |
| H                   | -3.324096 | -3.671317 | 0.047579  | C                   | 1.962298  | 1.508223  | -0.643070 | C                   | 2.261136  | -0.833287 | -0.826637 |
| 24                  |           |           |           | H                   | 2.581424  | -1.835860 | -0.208785 | C                   | 1.273275  | 1.494402  | -0.756616 |
| <sup>1</sup> GluArg |           |           |           | H                   | 3.389505  | -0.677479 | -1.283507 | H                   | 1.935654  | -1.866253 | -0.663898 |
| N                   | 2.822373  | -3.062104 | 1.272359  | C                   | 3.965496  | -0.604039 | 0.817132  | H                   | 2.369562  | -0.684394 | -1.906803 |
| C                   | 2.575256  | -1.657539 | 1.016770  | O                   | 1.236463  | 2.046186  | -1.453139 | C                   | 3.565901  | -0.591104 | -0.118260 |
| H                   | 2.481025  | -1.153956 | 1.991486  | O                   | 3.673569  | -0.143595 | 1.904929  | O                   | 0.730938  | 1.968143  | -1.733203 |
| C                   | 3.790919  | -1.070509 | 0.291565  | N                   | 5.226720  | -1.004824 | 0.503254  | C                   | 4.624368  | 0.062652  | -0.751045 |
| C                   | 1.295876  | -1.381808 | 0.218270  | H                   | 5.902184  | -1.029137 | 1.250037  | C                   | 3.734638  | -1.025464 | 1.200107  |
| H                   | 4.670861  | -1.314145 | 0.892125  | H                   | 5.428109  | -1.510239 | -0.342120 | H                   | 4.508530  | 0.396541  | -0.177970 |
| H                   | 3.893355  | -1.588972 | -0.669524 | O                   | 3.058820  | 2.057947  | -0.140109 | C                   | 5.826591  | 0.281357  | -0.083870 |
| C                   | 3.708677  | 0.435597  | 0.059046  | C                   | 3.342768  | 3.385081  | -0.590264 | C                   | 4.932938  | -0.804911 | 1.869989  |
| H                   | 2.871505  | 0.703791  | -0.589799 | H                   | 4.255687  | 3.678391  | -0.074682 | H                   | 2.918794  | -1.546525 | 1.696992  |
| H                   | 3.558586  | 0.953957  | 1.016957  | H                   | 3.487347  | 3.399906  | -1.673024 | H                   | 6.643046  | 0.786041  | -0.592773 |
| C                   | 4.942406  | 1.033338  | -0.571966 | H                   | 2.521862  | 4.057449  | -0.331921 | C                   | 5.982819  | -0.150169 | 1.229712  |
| O                   | 4.940618  | 1.850333  | -1.461704 | 26                  |           |           |           | H                   | 5.050381  | -1.150686 | 2.893034  |
| S                   | 0.932686  | -2.241992 | -1.160446 | <sup>1</sup> GluCys |           |           |           | H                   | 6.920455  | 0.017696  | 1.751623  |
| O                   | 6.068111  | 0.569092  | -0.001224 | N                   | 1.655899  | -3.035307 | 1.310214  | O                   | 2.107494  | 2.151546  | 0.037282  |
| H                   | 2.045415  | -3.453534 | 1.797250  | C                   | 1.344772  | -1.646439 | 1.043900  | C                   | 2.390473  | 3.498889  | -0.349825 |
| H                   | 2.812737  | -3.543808 | 0.374538  | H                   | 1.180375  | -1.150668 | 2.013299  | H                   | 3.093428  | 3.874296  | 0.391860  |
| C                   | 7.275367  | 1.108998  | -0.533303 | C                   | 2.558060  | -0.993059 | 0.372504  | H                   | 2.833735  | 3.523927  | -1.347784 |
| H                   | 8.084223  | 0.625742  | 0.014159  | C                   | 0.089863  | -1.436231 | 0.188408  | H                   | 1.474917  | 4.094452  | -0.351446 |
| H                   | 7.355135  | 0.896372  | -1.602198 | H                   | 3.421992  | -1.191410 | 1.011639  | 28                  |           |           |           |
| H                   | 7.310047  | 2.192110  | -0.390660 | H                   | 2.731357  | -1.503921 | -0.582442 | <sup>1</sup> GluGly |           |           |           |
| N                   | 0.541903  | -0.396798 | 0.707011  | C                   | 2.407547  | 0.506740  | 0.136166  | N                   | 1.096829  | 2.916838  | -1.321750 |
| H                   | 0.842000  | 0.112858  | 1.532377  | H                   | 1.584031  | 0.733982  | -0.545192 | C                   | 0.744825  | 1.555273  | -0.973300 |
| C                   | -0.668852 | 0.114727  | 0.101854  | H                   | 2.192425  | 1.015994  | 1.086615  | H                   | 0.443665  | 1.041555  | -1.899675 |
| H                   | -0.552006 | 0.089401  | -0.987823 | C                   | 3.631261  | 1.171749  | -0.446530 | C                   | 1.989728  | 0.852731  | -0.422038 |
| C                   | -1.891673 | -0.736364 | 0.495875  | O                   | 3.614117  | 2.016141  | -1.309923 | C                   | -0.413088 | 1.448229  | 0.024193  |
| C                   | -0.801049 | 1.548352  | 0.580761  | S                   | -0.174747 | -2.311309 | -1.199851 | H                   | 2.785472  | 0.982266  | -1.159898 |
| H                   | -1.594483 | -1.778167 | 0.327488  | O                   | 4.761435  | 0.734957  | 0.135401  | H                   | 2.296160  | 1.377489  | 0.490991  |
| H                   | -2.068605 | -0.617642 | 1.572793  | H                   | 0.877701  | -3.474260 | 1.793684  | C                   | 1.781735  | -0.629086 | -0.121510 |
| C                   | -3.159281 | -0.429524 | -0.290893 | H                   | 1.727033  | -3.515098 | 0.414553  | H                   | 1.033113  | -0.785602 | 0.658851  |
| O                   | -0.244546 | 1.975823  | 1.569994  | C                   | 5.957594  | 1.339941  | -0.351100 | H                   | 1.428598  | -1.145525 | -1.025562 |
| H                   | -3.482369 | 0.602326  | -0.130446 | H                   | 6.773061  | 0.871095  | 0.198943  | C                   | 3.028374  | -1.348087 | 0.333275  |
| H                   | -2.957688 | -0.549871 | -1.364169 | H                   | 6.068517  | 1.166135  | -1.424165 | O                   | 3.086205  | -2.120028 | 1.260400  |
| C                   | -4.305166 | -1.351140 | 0.121606  | H                   | 5.944951  | 2.418112  | -0.172492 | S                   | -0.466479 | 2.359616  | 1.412779  |
| H                   | -4.031742 | -2.400554 | -0.042067 | N                   | -0.733892 | -0.486903 | 0.642285  | O                   | 4.083647  | -1.050370 | -0.445012 |
| H                   | -4.510294 | -1.221896 | 1.188334  | H                   | -0.487568 | 0.047701  | 1.470236  | H                   | 0.291770  | 3.382933  | -1.730358 |
| N                   | -5.549199 | -1.103504 | -0.577881 | C                   | -1.920245 | -0.014683 | -0.033360 | H                   | 1.289032  | 3.417059  | -0.455205 |
| H                   | -5.530792 | -1.301693 | -1.568445 | H                   | -1.734309 | 0.024023  | -1.113603 | C                   | 5.295425  | -1.712297 | -0.089834 |
| C                   | -6.302777 | 0.004991  | -0.245552 | C                   | -3.097902 | -0.969254 | 0.225534  | H                   | 6.045825  | -1.358672 | -0.796428 |
| N                   | -5.970575 | 0.757119  | 0.737848  | C                   | -2.186300 | 1.381231  | 0.506074  | H                   | 5.585472  | -1.463545 | 0.933917  |
| N                   | -7.388833 | 0.168235  | -1.105325 | H                   | -2.754472 | -1.961682 | -0.073194 | H                   | 5.179387  | -2.796513 | -0.164981 |
| H                   | -6.696696 | 1.445091  | 0.923995  | H                   | -3.335948 | -0.976923 | 1.293293  | N                   | -1.352593 | 0.559421  | -0.304086 |
| H                   | -7.841313 | -0.696770 | -1.368127 | S                   | -4.578810 | -0.548465 | -0.761237 | H                   | -1.292802 | 0.031036  | -1.168662 |
| H                   | -8.053045 | 0.862849  | -0.799066 | O                   | -1.645282 | 1.831675  | 1.492831  | C                   | -2.507058 | 0.268805  | 0.498171  |
| O                   | -1.608257 | 2.264547  | -0.194333 | H                   | -4.971309 | -1.820340 | -0.944251 | C                   | -3.326865 | -0.779325 | -0.214182 |
| C                   | -1.837026 | 3.609050  | 0.239254  | O                   | -3.093383 | 2.021660  | -0.217943 | H                   | -2.220567 | -0.088874 | 1.495278  |
| H                   | -2.505313 | 4.045241  | -0.501343 | C                   | -3.458674 | 3.322008  | 0.256699  | H                   | -3.109466 | 1.170543  | 0.666822  |
| H                   | -2.301887 | 3.615633  | 1.227419  | H                   | -4.213767 | 3.684003  | -0.438587 | O                   | -3.027224 | -1.261722 | -1.283935 |
| H                   | -0.894772 | 4.159511  | 0.282217  | H                   | -3.864416 | 3.256842  | 1.268431  | O                   | -4.411307 | -1.098140 | 0.484998  |
| 25                  |           |           |           | H                   | -2.587759 | 3.980798  | 0.260429  | C                   | -5.252000 | -2.090726 | -0.110767 |
| <sup>1</sup> GluAsn |           |           |           | 27                  |           |           |           | H                   | -4.701071 | -3.023479 | -0.249893 |
| N                   | -1.809196 | -2.941442 | -1.532081 | <sup>1</sup> GluPhe |           |           |           | H                   | -6.077120 | -2.232373 | 0.585376  |
| C                   | -1.517190 | -1.567458 | -1.178704 | N                   | -2.537562 | -2.967634 | -1.450517 | H                   | -5.620475 | -1.746996 | -1.079846 |
| H                   | -1.403375 | -1.000205 | -2.115688 | C                   | -2.245247 | -1.583064 | -1.141014 | 29                  |           |           |           |
| C                   | -2.716736 | -0.994092 | -0.415773 | H                   | -2.188622 | -1.034368 | -2.094136 | <sup>1</sup> GluGln |           |           |           |
| C                   | -0.233702 | -1.386384 | -0.358618 | C                   | -3.408392 | -1.006827 | -0.326447 | N                   | -1.800161 | -3.065836 | -1.351211 |

|         |           |           |           |         |           |           |           |         |           |           |           |
|---------|-----------|-----------|-----------|---------|-----------|-----------|-----------|---------|-----------|-----------|-----------|
| C       | -1.684307 | -1.650742 | -1.065006 | H       | -5.842648 | -1.165043 | 0.038725  | C       | 2.945012  | -0.671658 | -0.438243 |
| H       | -1.603929 | -1.122472 | -2.027686 | H       | -5.992674 | -0.999283 | -1.709290 | C       | 1.794893  | 1.585784  | -0.574406 |
| C       | -2.967854 | -1.183617 | -0.369670 | H       | -4.967022 | -2.268656 | -1.032027 | H       | 2.699610  | -1.706313 | -0.168403 |
| C       | -0.459445 | -1.280112 | -0.221316 | O       | -2.593591 | 2.383488  | -0.416662 | H       | 3.066700  | -0.642322 | -1.528875 |
| H       | -3.804655 | -1.489420 | -1.002616 | C       | -2.743411 | 3.740811  | 0.011372  | C       | 4.259603  | -0.278905 | 0.243474  |
| H       | -3.055009 | -1.727446 | 0.578791  | H       | -3.399400 | 4.208379  | -0.721232 | O       | 1.261545  | 1.982044  | -1.588508 |
| C       | -3.021643 | 0.319488  | -0.109911 | H       | -3.187242 | 3.781253  | 1.008581  | H       | 4.521234  | 0.743502  | -0.060298 |
| H       | -2.227249 | 0.645599  | 0.565533  | H       | -1.772749 | 4.240773  | 0.034051  | C       | 4.153071  | -0.307552 | 1.766798  |
| H       | -2.893833 | 0.866454  | -1.054959 |         |           |           |           | C       | 5.368616  | -1.212090 | -0.239882 |
| C       | -4.318058 | 0.794803  | 0.499099  | 31      |           |           |           | H       | 3.798703  | -1.284132 | 2.116037  |
| O       | -4.409327 | 1.573496  | 1.418029  | 'GluHis |           |           |           | H       | 5.129988  | -0.120995 | 2.224488  |
| S       | -0.063123 | -2.129039 | 1.155139  | N       | 2.395066  | -3.128068 | 1.116278  | H       | 3.465935  | 0.455492  | 2.143646  |
| O       | -5.383947 | 0.266767  | -0.127710 | C       | 2.037823  | -1.736525 | 0.937336  | H       | 5.466137  | -1.192863 | -1.330703 |
| H       | -0.977441 | -3.379584 | -1.858106 | H       | 1.847387  | -1.311697 | 1.935847  | H       | 6.334728  | -0.927202 | 0.188617  |
| H       | -1.779061 | -3.563786 | -0.462709 | C       | 3.233801  | -0.998060 | 0.325425  | H       | 5.164547  | -2.246847 | 0.059337  |
| C       | -6.647222 | 0.689472  | 0.380185  | C       | 0.784448  | -1.514421 | 0.081859  | O       | 2.547073  | 2.343583  | 0.220266  |
| H       | -7.396728 | 0.167686  | -0.214276 | H       | 4.100638  | -1.217990 | 0.953456  | C       | 2.712371  | 3.699092  | -0.208265 |
| H       | -6.745474 | 0.428026  | 1.436616  | H       | 3.426871  | -1.430148 | -0.663823 | H       | 3.347276  | 4.168313  | 0.541582  |
| H       | -6.762075 | 1.771542  | 0.277323  | C       | 3.036603  | 0.509045  | 0.202935  | H       | 3.185607  | 3.734518  | -1.192032 |
| N       | 0.222253  | -0.224384 | -0.668018 | H       | 2.202117  | 0.761800  | -0.455988 | H       | 1.743634  | 4.200465  | -0.261322 |
| H       | -0.101928 | 0.284396  | -1.484553 | H       | 2.808610  | 0.937639  | 1.189815  |         |           |           |           |
| C       | 1.354131  | 0.374520  | 0.002413  | C       | 4.232828  | 1.263870  | -0.325742 | 33      |           |           |           |
| H       | 1.170017  | 0.337023  | 1.083734  | O       | 4.173194  | 2.215992  | -1.066606 | 'GluLys |           |           |           |
| C       | 2.663520  | -0.375317 | -0.314799 | S       | 0.563927  | -2.307187 | -1.360984 | N       | 1.975720  | -3.129624 | 1.300502  |
| C       | 1.403771  | 1.817643  | -0.463225 | O       | 5.387852  | 0.774792  | 0.155729  | C       | 1.864377  | -1.708610 | 1.042927  |
| H       | 2.414688  | -1.440638 | -0.329746 | H       | 1.624311  | -3.626782 | 1.551396  | H       | 1.814365  | -1.197123 | 2.016887  |
| H       | 3.026808  | -0.112457 | -1.313282 | H       | 2.500452  | -3.543146 | 0.192122  | C       | 3.133691  | -1.240367 | 0.322441  |
| C       | 3.767980  | -0.136493 | 0.703679  | C       | 6.558248  | 1.461933  | -0.282610 | C       | 0.621323  | -1.312035 | 0.237398  |
| O       | 0.784478  | 2.239579  | -1.415246 | H       | 7.398047  | 0.941746  | 0.177179  | H       | 3.984177  | -1.566485 | 0.926336  |
| H       | 3.914809  | 0.938385  | 0.864436  | H       | 6.637728  | 1.431298  | -1.371942 | H       | 3.189560  | -1.766806 | -0.638070 |
| H       | 3.488627  | -0.567545 | 1.672517  | H       | 6.533776  | 2.507183  | 0.035666  | C       | 3.195582  | 0.266527  | 0.089648  |
| C       | 5.092503  | -0.698923 | 0.212518  | N       | -0.074758 | -0.621315 | 0.585791  | H       | 2.386705  | 0.613208  | -0.557843 |
| O       | 5.389641  | -0.736013 | -0.969667 | H       | 0.106067  | -0.213589 | 1.496324  | H       | 3.097034  | 0.796391  | 1.047712  |
| N       | 5.941287  | -1.112182 | 1.189747  | C       | -1.309161 | -0.198233 | -0.039212 | C       | 4.479361  | 0.745784  | -0.542800 |
| H       | 6.828003  | -1.499423 | 0.911199  | H       | -1.175707 | -0.200002 | -1.123521 | O       | 4.552899  | 1.564409  | -1.428021 |
| H       | 5.663482  | -1.171786 | 2.153409  | C       | -2.472781 | -1.147136 | 0.347866  | S       | 0.179160  | -2.136934 | -1.138374 |
| O       | 2.224385  | 2.556502  | 0.281310  | C       | -1.601983 | 1.200823  | 0.463631  | S       | 5.556783  | 0.173095  | 0.021969  |
| C       | 2.360437  | 3.920137  | -0.134514 | H       | -2.281933 | -2.102715 | -0.147611 | H       | 1.160638  | -3.446477 | 1.817777  |
| H       | 3.051859  | 4.374769  | 0.573176  | H       | -2.409271 | -1.320135 | 1.429213  | H       | 1.930339  | -3.609795 | 0.403032  |
| H       | 2.758819  | 3.970815  | -1.150070 | H       | -3.824883 | -0.643183 | -0.012746 | C       | 6.808896  | 0.599324  | -0.510041 |
| H       | 1.391865  | 4.423479  | -0.105014 | O       | -1.509225 | 1.510440  | 1.634875  | H       | 7.569532  | 0.041546  | 0.035620  |
|         |           |           |           | N       | -4.512125 | 0.252906  | 0.778858  | H       | 6.867829  | 0.382551  | -1.579437 |
| 30      |           |           |           | C       | -4.651312 | -0.849292 | -1.089209 | H       | 6.944009  | 1.674191  | -0.364993 |
| 'GluIle |           |           |           | H       | -4.195057 | 0.616111  | 1.664608  | N       | -0.032919 | -0.253344 | 0.718254  |
| N       | 1.588504  | -3.123100 | 1.178027  | C       | -5.689728 | 0.528804  | 0.156811  | H       | 0.316213  | 0.229634  | 1.539924  |
| N       | 1.386921  | -1.706424 | 0.952608  | N       | -5.805863 | -0.120480 | -0.975711 | C       | -1.176463 | 0.377865  | 0.095392  |
| H       | 1.236032  | -1.231821 | 1.934702  | H       | -4.468801 | -1.491312 | -1.940569 | H       | -1.049953 | 0.328077  | -0.992781 |
| C       | 2.661051  | -1.123176 | 0.331451  | H       | -6.424732 | 1.200065  | 0.580482  | C       | -2.486996 | -0.337534 | 0.478453  |
| C       | 0.171332  | -1.376304 | 0.078568  | O       | -1.998821 | 2.011142  | -0.505990 | C       | -1.155400 | 1.823167  | 0.555480  |
| H       | 3.492218  | -1.402408 | 0.983749  | C       | -2.378095 | 3.328487  | -0.096821 | H       | -2.294070 | 0.362414  | -0.783053 |
| H       | 2.821344  | -1.615275 | -0.635538 | H       | -2.592660 | 3.870240  | -1.016184 | H       | -2.673105 | -0.184894 | 1.549692  |
| C       | 2.623109  | 0.390342  | 0.140135  | H       | -3.268709 | 3.284026  | 0.534664  | C       | -3.704726 | 0.066135  | -0.344597 |
| H       | 1.837429  | 0.695079  | -0.555349 | H       | -1.567062 | 3.805510  | 0.456908  | O       | -0.557792 | 2.204750  | 1.539149  |
| H       | 2.416932  | 0.883936  | 1.100740  |         |           |           |           | H       | -3.910012 | 1.136442  | -0.224494 |
| C       | 3.907132  | 0.982299  | -0.387935 | 32      |           |           |           | H       | -3.479807 | -0.085305 | -1.408984 |
| O       | 3.978068  | 1.834795  | -1.240779 | 'GluLeu |           |           |           | C       | -4.942126 | -0.741569 | 0.031958  |
| S       | -0.117468 | -2.187077 | -1.345445 | N       | -1.706377 | -3.120847 | -1.234555 | H       | -4.755395 | -1.813737 | -0.101878 |
| O       | 4.984519  | 0.467737  | 0.230295  | C       | -1.490805 | -1.704461 | -1.020042 | H       | -5.161059 | -0.597589 | 1.100558  |
| H       | 0.769214  | -3.514710 | 1.633843  | H       | -1.377106 | -1.232097 | -2.008314 | C       | -6.170673 | -0.362414 | -0.783053 |
| H       | 1.633787  | -3.576320 | 0.266620  | C       | -2.736563 | -1.115140 | -0.349622 | H       | -6.345396 | 0.725497  | -0.683281 |
| C       | 6.234202  | 0.998664  | -0.204351 | C       | -0.240293 | -1.378997 | -0.194859 | H       | -5.961194 | -0.542635 | -1.845084 |
| H       | 6.996886  | 0.471417  | 0.368149  | H       | -3.594652 | -1.391656 | -0.967297 | N       | -7.308687 | -1.188577 | -0.405889 |
| H       | 6.373255  | 0.830320  | -1.275032 | H       | -2.859702 | -1.605311 | 0.623735  | H       | -7.593239 | -0.966442 | 0.543381  |
| H       | 6.285273  | 2.073323  | -0.011605 | C       | -2.683565 | 0.398160  | -0.162106 | H       | -8.105252 | -0.977251 | -0.997462 |
| N       | -0.589117 | -0.383492 | 0.545341  | H       | -1.865627 | 0.700107  | 0.496568  | O       | -1.879705 | 2.614292  | -0.231865 |
| H       | -0.306560 | 0.115885  | 1.382929  | H       | -2.518081 | 0.889935  | -1.131536 | C       | -1.929054 | 3.988160  | 0.165647  |
| C       | -1.720241 | 0.199319  | -0.142950 | C       | -3.938740 | 0.999069  | 0.422274  | H       | -2.555264 | 4.484842  | -0.573803 |
| H       | -1.505893 | 0.196427  | -1.218821 | O       | -3.964474 | 1.868621  | 1.260409  | H       | -2.361248 | 4.082887  | 1.164294  |
| C       | -3.019958 | -0.615771 | 0.093890  | S       | 0.090966  | -2.178276 | 1.226930  | H       | -0.924997 | 4.417686  | 0.170977  |
| C       | -1.815018 | 1.629487  | 0.355263  | O       | -5.047269 | 0.472376  | -0.126554 |         |           |           |           |
| H       | -2.708810 | -1.652469 | -0.091350 | H       | -0.907238 | -3.516787 | -1.721322 | 34      |           |           |           |
| C       | -3.502081 | -0.498207 | 1.536944  | H       | -1.718469 | -3.572050 | -0.321112 | 'GluMet |           |           |           |
| C       | -4.100361 | -0.276348 | -0.936727 | C       | -6.272285 | 1.012049  | 0.364036  | N       | 1.946598  | -3.101169 | 1.303629  |
| O       | -1.253321 | 2.032075  | 1.351903  | H       | -7.064060 | 0.476096  | -0.158729 | C       | 1.808332  | -1.682552 | 1.047849  |
| H       | -3.897718 | 0.502285  | 1.749570  | H       | -6.355255 | 0.861769  | 1.443210  | H       | 1.752414  | -1.172907 | 2.022385  |
| H       | -4.298244 | -1.217908 | 1.742898  | H       | -6.332994 | 2.083386  | 0.156310  | C       | 3.065787  | -1.189942 | 0.322661  |
| H       | -2.692432 | -0.696391 | 2.246227  | N       | 0.514685  | -0.402244 | -0.700348 | C       | 0.555361  | -1.307826 | 0.247817  |
| H       | -4.444942 | 0.753805  | -0.789012 | H       | 0.229608  | 0.069033  | -1.552960 | H       | 3.924429  | -1.501631 | 0.922608  |
| H       | -3.646395 | -0.308244 | -1.935244 | C       | 1.695869  | 0.156824  | -0.077411 | H       | 3.127478  | -1.713780 | -0.638947 |
| C       | -5.289556 | -1.229649 | -0.903404 | H       | 1.547773  | 0.143972  | 1.007442  | C       | 3.099910  | 0.318297  | 0.092183  |

|                     |           |           |           |                     |           |           |           |                     |           |           |           |
|---------------------|-----------|-----------|-----------|---------------------|-----------|-----------|-----------|---------------------|-----------|-----------|-----------|
| H                   | 2.281038  | 0.652198  | -0.549445 | C                   | -1.065850 | -1.729995 | -0.923522 | C                   | 2.054817  | 3.506777  | -0.521725 |
| H                   | 2.999477  | 0.845322  | 1.051845  | H                   | -0.853849 | -1.295865 | -1.913166 | H                   | 2.458320  | 3.534604  | -1.536409 |
| C                   | 4.371252  | 0.818622  | -0.539192 | C                   | -2.283091 | -1.007131 | -0.335927 | H                   | 1.137018  | 4.097953  | -0.487651 |
| O                   | 4.424617  | 1.630720  | -1.441801 | C                   | 0.163989  | -1.504900 | -0.035455 | H                   | 2.783946  | 3.886100  | 0.192265  |
| S                   | 0.118186  | -2.138398 | -1.125215 | H                   | -3.129401 | -1.219394 | -0.993955 |                     |           |           |           |
| O                   | 5.461659  | 0.272146  | 0.016168  | H                   | -2.503340 | -1.456553 | 0.639919  | 38                  |           |           |           |
| H                   | 1.141225  | -3.434005 | 1.825945  | C                   | -2.097399 | 0.499394  | -0.180974 | <sup>1</sup> GluThr |           |           |           |
| H                   | 1.907234  | -3.582898 | 0.406844  | H                   | -1.295325 | 0.743189  | 0.519864  | N                   | -1.210549 | -3.334655 | -0.690895 |
| C                   | 6.703473  | 0.717812  | -0.524358 | H                   | -1.829991 | 0.944405  | -1.150235 | C                   | -0.959472 | -1.908354 | -0.681522 |
| H                   | 7.476591  | 0.178235  | 0.022016  | C                   | -3.323515 | 1.231012  | 0.309015  | H                   | -0.748597 | -1.601711 | -1.717876 |
| H                   | 6.761833  | 0.494437  | -1.592404 | O                   | -3.319368 | 2.115500  | 1.131518  | C                   | -2.232564 | -1.188938 | -0.220008 |
| H                   | 6.819114  | 1.795997  | -0.387423 | S                   | 0.349351  | -2.304704 | 1.410157  | C                   | 0.229693  | -1.481026 | 0.186769  |
| N                   | -0.116404 | -0.260062 | 0.731410  | O                   | -4.439010 | 0.803291  | -0.307521 | H                   | -3.048307 | -1.548937 | -0.852362 |
| H                   | 0.233383  | 0.239113  | 1.543139  | H                   | -0.624252 | -3.609180 | -1.550127 | H                   | -2.445031 | -1.508290 | 0.807707  |
| C                   | -1.267058 | 0.348632  | 0.103822  | H                   | -1.518965 | -3.547549 | -0.201711 | C                   | -2.151019 | 0.335447  | -0.280939 |
| H                   | -1.129757 | 0.307375  | -0.984058 | C                   | -5.635072 | 1.470366  | 0.089284  | H                   | -1.374074 | 0.734169  | 0.374163  |
| C                   | -2.566537 | -0.398200 | 0.472106  | H                   | -6.439055 | 1.002597  | -0.478349 | H                   | -1.911061 | 0.657227  | -1.303328 |
| C                   | -1.285038 | 1.792992  | 0.570365  | H                   | -5.804155 | 1.352972  | 1.162422  | C                   | -3.439688 | 1.013957  | 0.111623  |
| H                   | -2.336210 | -1.465982 | 0.403856  | H                   | -5.575548 | 2.537592  | -0.138980 | O                   | -3.548012 | 1.892127  | 0.933553  |
| H                   | -2.826061 | -0.181173 | 1.515320  | N                   | 1.030514  | -0.607957 | -0.514389 | S                   | 0.433172  | -2.078811 | 1.725574  |
| C                   | -3.733478 | -0.083288 | -0.452677 | H                   | 0.848129  | -0.147571 | -1.400784 | O                   | -4.482709 | 0.529550  | -0.588494 |
| O                   | -0.653919 | 2.198399  | 1.522125  | C                   | 2.221143  | -0.140560 | 0.157980  | H                   | -0.388155 | -3.822718 | -1.034038 |
| H                   | -3.951838 | 0.988568  | -0.464907 | H                   | 2.048859  | -0.111401 | 1.237905  | H                   | -1.320739 | -3.635701 | 0.275982  |
| H                   | -3.485294 | -0.395382 | 1.473938  | C                   | 3.392797  | -1.088766 | -0.131641 | C                   | -5.738733 | 1.128374  | -0.280899 |
| S                   | -5.206065 | -0.988537 | 0.109411  | C                   | 2.506162  | 1.248382  | -0.353857 | H                   | -6.471113 | 0.626557  | -0.912944 |
| C                   | -6.369134 | -0.478919 | -1.176270 | H                   | 3.106358  | -2.072866 | 0.262291  | H                   | -5.985014 | 0.989758  | 0.774801  |
| H                   | -6.040016 | -0.811393 | -2.164598 | H                   | 3.507260  | -1.168442 | -1.224764 | H                   | -5.718848 | 2.200066  | -0.495039 |
| H                   | -7.326323 | -0.953422 | -0.949827 | O                   | 4.542614  | -0.568936 | 0.485512  | N                   | 1.041059  | -0.592792 | -0.397394 |
| H                   | -6.509714 | 0.605668  | -1.180406 | O                   | 2.185937  | 1.591862  | -1.502991 | H                   | 0.784577  | -0.228838 | -1.306844 |
| O                   | -2.086247 | 2.551612  | -0.173665 | H                   | 5.211718  | -1.258624 | 0.500910  | C                   | 2.116610  | 0.116117  | 0.247633  |
| C                   | -2.178081 | 3.921567  | 0.233286  | O                   | 3.137913  | 2.013923  | 0.491969  | H                   | 2.050950  | -0.087323 | 1.322980  |
| H                   | -2.861104 | 4.391540  | -0.472482 | C                   | 3.497293  | 3.313982  | 0.017475  | C                   | 3.496690  | -0.319551 | -0.262160 |
| H                   | -2.565752 | 3.992286  | 1.251844  | H                   | 3.995611  | 3.803050  | 0.852851  | C                   | 1.907957  | 1.602181  | -0.008086 |
| H                   | -1.195056 | 4.395223  | 0.192052  | H                   | 4.171086  | 3.233179  | -0.838413 | H                   | 4.235941  | 0.276707  | 0.293775  |
|                     |           |           |           | H                   | 2.606399  | 3.871166  | -0.280832 | C                   | 3.761469  | -1.797822 | -0.046037 |
| 35                  |           |           |           | 37                  |           |           |           | O                   | 3.508356  | 0.028693  | -1.636322 |
| <sup>1</sup> GluPro |           |           |           | <sup>1</sup> GluTyr |           |           |           | O                   | 1.044674  | 2.058048  | -0.720066 |
| N                   | 0.493337  | 0.175248  | 2.046270  | N                   | -2.903354 | -2.960011 | -1.426603 | H                   | 3.021843  | -2.399826 | -0.580265 |
| C                   | 0.293107  | -0.158737 | 0.646738  | C                   | -2.601616 | -1.575689 | -1.124368 | H                   | 4.757860  | -2.061088 | -0.418919 |
| H                   | -0.013387 | 0.764708  | 0.140876  | H                   | -2.585254 | -1.023405 | -2.076952 | H                   | 3.714487  | -2.058113 | 1.014606  |
| C                   | 1.617772  | -0.596376 | 0.012149  | C                   | -3.731426 | -1.004881 | -0.260642 | H                   | 4.344110  | -0.263698 | -0.212794 |
| C                   | -0.768698 | -1.245367 | 0.439599  | C                   | -1.248130 | -1.366550 | -0.435802 | O                   | 2.803397  | 2.332878  | 0.657168  |
| H                   | 1.979328  | -1.491840 | 0.526712  | H                   | -4.668504 | -1.203530 | -0.786626 | C                   | 2.695512  | 3.744891  | 0.459913  |
| H                   | 1.449896  | -0.893130 | -1.029623 | H                   | -3.755265 | -1.568676 | 0.679782  | H                   | 3.480130  | 4.188914  | 1.071026  |
| C                   | 2.658470  | 0.508757  | 0.089285  | C                   | -3.594305 | 0.485716  | 0.034052  | H                   | 2.839666  | 3.994014  | -0.593833 |
| H                   | 2.377696  | 1.382384  | -0.511775 | H                   | -2.690736 | 0.707933  | 0.606997  | H                   | 1.712659  | 4.099916  | 0.777609  |
| H                   | 2.728578  | 0.871642  | 1.121954  | H                   | -3.528187 | 1.048412  | -0.908293 |                     |           |           |           |
| C                   | 4.023490  | 0.055389  | -0.351575 | C                   | -4.744788 | 1.077199  | 0.811955  | 39                  |           |           |           |
| O                   | 4.353738  | -1.084177 | -0.581358 | O                   | -4.634746 | 1.879271  | 1.708342  | <sup>1</sup> GluTrp |           |           |           |
| S                   | -0.572397 | -2.733328 | 1.162378  | S                   | -0.786889 | -2.293377 | 0.868329  | N                   | -3.034009 | -2.375488 | -2.299367 |
| O                   | 4.867046  | 1.100574  | -0.452984 | O                   | -5.931278 | 0.629483  | 0.365606  | C                   | -2.772977 | -1.139974 | -1.589265 |
| H                   | -0.378120 | 0.543052  | 2.420133  | H                   | -2.182580 | -3.342162 | -2.032163 | H                   | -2.845974 | -0.316896 | -2.317291 |
| H                   | 0.669170  | -0.696791 | 2.543194  | H                   | -2.836449 | -3.487672 | -0.557796 | C                   | -3.865775 | -0.941293 | -0.534041 |
| C                   | 6.196804  | 0.758523  | -0.832944 | C                   | -7.066450 | 1.168040  | 1.039498  | C                   | -1.385132 | -1.073768 | -0.940128 |
| H                   | 6.746561  | 1.698769  | -0.874522 | H                   | -7.935714 | 0.698518  | 0.579777  | H                   | -4.826360 | -1.019724 | -1.049222 |
| H                   | 6.648736  | 0.084716  | -0.100364 | H                   | -7.026288 | 0.938554  | 2.107087  | H                   | -3.804002 | -1.773585 | 0.177491  |
| H                   | 6.207458  | 0.266089  | -1.808805 | H                   | -7.108362 | 2.253471  | 0.918248  | C                   | -3.771901 | 0.384981  | 0.214777  |
| N                   | -1.830547 | -0.957498 | -0.331736 | N                   | -0.510689 | -0.381786 | -0.951925 | H                   | -2.846282 | 0.464515  | 0.790007  |
| C                   | -2.846665 | -1.957975 | -0.659928 | H                   | -0.860670 | 0.161640  | -1.734859 | H                   | -3.783741 | 1.219710  | -0.500786 |
| C                   | -2.171348 | 0.355610  | -0.873739 | C                   | 0.769811  | 0.056606  | -0.446045 | C                   | -4.898442 | 0.632317  | 1.188332  |
| H                   | -3.510188 | -2.107562 | 0.201774  | H                   | 0.761078  | -0.012383 | 0.646622  | O                   | -4.768635 | 1.101846  | 2.293594  |
| H                   | -2.358927 | -2.913159 | -0.864692 | C                   | 1.916703  | -0.829421 | -0.995646 | S                   | -0.802950 | -2.331625 | -0.017818 |
| C                   | -3.567643 | -1.347084 | -1.852231 | C                   | 0.931453  | 1.498110  | -0.885184 | O                   | -6.091335 | 0.296992  | 0.666201  |
| C                   | -3.551295 | 0.143150  | -1.531239 | H                   | 1.591385  | -1.862137 | -0.830625 | H                   | -2.341323 | -2.501065 | -3.032004 |
| H                   | -1.440063 | 0.681171  | -1.622595 | H                   | 1.986099  | -0.673870 | -2.078247 | H                   | -2.882983 | -3.143844 | -1.647773 |
| C                   | -2.279930 | 1.425965  | 0.200866  | C                   | 3.246984  | -0.598158 | -0.334855 | C                   | -7.206299 | 0.529423  | 1.523677  |
| H                   | -4.578676 | -1.741590 | -1.977795 | O                   | 0.352508  | 1.970827  | -1.841267 | H                   | -8.082839 | 0.194787  | 0.969464  |
| H                   | -3.008275 | -1.547610 | -2.772538 | C                   | 4.288267  | 0.053819  | -0.992848 | H                   | -7.102085 | -0.034711 | 2.453703  |
| H                   | -4.339974 | 0.373995  | -0.806327 | C                   | 3.469735  | -1.040983 | 0.974464  | H                   | -7.290274 | 1.591328  | 1.768531  |
| H                   | -3.686120 | 0.794442  | -2.396940 | H                   | 4.145803  | 0.400233  | -2.014117 | N                   | -0.726163 | 0.064048  | -1.161602 |
| O                   | -2.461506 | 1.226802  | 1.377665  | C                   | 5.516456  | 0.262701  | -0.372444 | H                   | -1.150234 | 0.795473  | -1.723548 |
| O                   | -2.192597 | 2.637881  | -0.357140 | C                   | 4.685777  | -0.836874 | 1.607936  | C                   | 0.571468  | 0.406975  | -0.723191 |
| C                   | -2.336960 | 3.734172  | 0.550428  | H                   | 2.673194  | -1.561798 | 1.501886  | H                   | 0.660676  | -0.005944 | 0.386080  |
| H                   | -1.553800 | 3.702672  | 1.311257  | H                   | 6.318887  | 0.767428  | -0.907175 | C                   | 1.704303  | -0.166813 | -1.513381 |
| H                   | -2.245818 | 4.633773  | -0.056542 | C                   | 5.718334  | -0.181241 | 0.933669  | C                   | 0.628119  | 1.920232  | -0.582439 |
| H                   | -3.311322 | 3.698471  | 1.042918  | H                   | 4.859749  | -1.183451 | 2.621358  | H                   | 1.484399  | -1.235853 | -1.615360 |
|                     |           |           |           | O                   | 6.890254  | -0.010328 | 1.596827  | H                   | 1.615049  | 0.283225  | -2.508764 |
| 36                  |           |           |           | H                   | 7.514703  | 0.439611  | 1.018915  | C                   | 3.077688  | 0.029886  | -0.968469 |
| <sup>1</sup> GluSer |           |           |           | O                   | 1.794091  | 2.158271  | -0.124220 | O                   | -0.012054 | 2.628454  | -1.332284 |
| N                   | -1.406882 | -3.123652 | -1.121259 |                     |           |           |           | C                   | 4.048994  | 0.858839  | -1.463460 |

|         |           |           |            |         |           |           |           |         |           |           |           |
|---------|-----------|-----------|------------|---------|-----------|-----------|-----------|---------|-----------|-----------|-----------|
| C       | 3.160924  | -1.555360 | 1.106983   | C       | -0.743340 | -0.627337 | 0.993897  | C       | -4.382002 | 0.423449  | -0.314444 |
| C       | 3.642338  | -0.608868 | 0.190082   | C       | -0.859937 | 1.597232  | -0.202349 | H       | -5.207564 | -0.281131 | -0.406056 |
| H       | 4.023483  | 1.504713  | -0.2330982 | H       | -0.135233 | -1.539783 | 1.006564  | H       | -4.519403 | 1.065279  | 0.558973  |
| N       | 5.177588  | 0.778778  | -0.683150  | H       | -0.635767 | -0.113081 | 1.951177  | H       | -4.312942 | 1.051497  | -1.205738 |
| C       | 4.961667  | -0.115317 | 0.336934   | C       | -2.188436 | -1.029525 | 0.837487  |         |           |           |           |
| C       | 3.994374  | -1.973474 | 2.131109   | O       | -0.292031 | 2.645779  | -0.000550 | 44      |           |           |           |
| H       | 2.154430  | -1.956224 | 1.009895   | O       | -3.040420 | -0.897030 | 1.682945  | 'AlaArg |           |           |           |
| H       | 6.041046  | 1.260436  | -0.861440  | O       | -2.161614 | 1.485607  | -0.466912 | N       | -4.319594 | 0.673506  | -1.280930 |
| C       | 5.804150  | -0.535392 | 1.367412   | C       | -2.894229 | 2.713099  | -0.453645 | C       | -4.310744 | -0.390946 | -0.277755 |
| C       | 5.300545  | -1.468060 | 2.260198   | H       | -3.928081 | 2.440602  | -0.659798 | H       | -4.938151 | -0.068115 | 0.562323  |
| H       | 3.636246  | -2.705969 | 2.848298   | H       | -2.812003 | 3.195588  | 0.522645  | C       | -4.850506 | -1.718769 | -0.800511 |
| H       | 6.814683  | -0.149051 | 1.467000   | H       | -2.513735 | 3.391859  | -1.220234 | C       | -2.908386 | -0.546392 | 0.334150  |
| H       | 5.928666  | -1.817280 | 3.074504   | O       | -2.405222 | -1.594709 | -0.359268 | H       | -4.248079 | -2.066565 | -1.647777 |
| O       | 1.469859  | 2.366613  | 0.339941   | C       | -3.749360 | -2.002684 | -0.596491 | H       | -4.811848 | -2.485119 | -0.024842 |
| C       | 1.626372  | 3.786410  | 0.389234   | H       | -4.422310 | -1.141834 | -0.564124 | H       | -5.884526 | -1.595362 | -1.137159 |
| H       | 2.009507  | 4.161818  | -0.562482  | H       | -3.752676 | -2.452820 | -1.588660 | S       | -2.562659 | -1.729108 | 1.459047  |
| H       | 0.669572  | 4.268495  | 0.601696   | H       | -4.071401 | -2.727720 | 0.154830  | H       | -4.269432 | 0.283198  | -2.216052 |
| H       | 2.338454  | 3.974576  | 1.191101   |         |           |           |           | H       | -5.168254 | 1.221393  | -1.226859 |
|         |           |           |            | 42      |           |           |           | N       | -2.051400 | 0.371012  | -0.091386 |
| 40      |           |           |            | 'AlaGlu |           |           |           | H       | -2.436464 | 1.069536  | -0.733965 |
| 'GluVal |           |           |            | N       | -3.904014 | 0.237047  | -1.317370 | C       | -0.689258 | 0.503763  | 0.362178  |
| N       | -1.472335 | -3.133519 | -1.066913  | C       | -3.769874 | -0.713862 | -0.214084 | H       | -0.652116 | 0.248574  | 1.428452  |
| C       | -1.192870 | -1.725095 | -0.875155  | H       | -4.434978 | -0.385803 | 0.594552  | C       | 0.247374  | -0.450585 | -0.405656 |
| H       | -0.985214 | -1.289527 | -1.864928  | C       | -4.141980 | -2.143473 | -0.595384 | C       | -0.294820 | 1.953047  | 0.158108  |
| C       | -2.447669 | -1.049761 | -0.310870  | C       | -2.361867 | -0.632770 | 0.397711  | H       | -0.242954 | -0.130710 | -0.376541 |
| C       | 0.014114  | -1.442123 | 0.026997   | H       | -3.496736 | -2.501228 | -1.406031 | H       | 0.284896  | -0.134291 | -1.456076 |
| H       | -3.273548 | -1.296299 | -0.982821  | H       | -4.016656 | -2.816577 | 0.254092  | C       | 1.652572  | -0.564538 | 0.170852  |
| H       | -2.666783 | -1.504296 | 0.662886   | H       | -5.181252 | -2.180538 | -0.936333 | O       | -0.826464 | 2.696947  | -0.635308 |
| C       | -2.323626 | 0.463849  | -0.157420  | S       | -1.864321 | -0.633289 | 1.618898  | H       | 2.179950  | 0.391817  | 0.120345  |
| H       | -1.551459 | 0.739337  | 0.564801   | H       | -3.784799 | -0.233687 | -2.208399 | H       | 1.586450  | -0.848326 | 1.230312  |
| H       | -2.047909 | 0.915660  | -1.121050  | H       | -4.821128 | 0.664255  | -1.322118 | C       | 2.480857  | -1.602131 | -0.583589 |
| C       | -3.591734 | 1.144276  | 0.297258   | N       | -1.629256 | 0.348191  | -0.113735 | H       | 1.990470  | -2.582475 | -0.547152 |
| O       | -3.655043 | 1.997123  | 1.150263   | H       | -2.104175 | 0.937411  | -0.803820 | H       | 2.565676  | -1.309718 | -1.634127 |
| S       | 0.209033  | -2.221819 | 1.483903   | C       | -0.302852 | 0.691580  | 0.328643  | N       | 3.830913  | -1.763570 | -0.082410 |
| O       | -4.662722 | 0.707994  | -0.388959  | H       | -0.254010 | 0.535653  | 1.414631  | H       | 3.895703  | -2.132291 | 0.856150  |
| H       | -0.664378 | -3.587095 | -1.483816  | C       | 0.759425  | -0.199895 | -0.346308 | C       | 4.778711  | -0.800773 | -0.367021 |
| H       | -1.574278 | -3.555293 | -0.145072  | C       | -0.094343 | 2.159448  | 0.011410  | N       | 4.514954  | 0.171547  | -1.159330 |
| C       | -5.896353 | 1.324945  | -0.028364  | H       | 0.353670  | -1.215526 | -0.348791 | N       | 5.973526  | -1.034162 | 0.315526  |
| H       | -6.656401 | 0.859701  | -0.655516  | H       | 0.886240  | 0.094426  | -1.393304 | H       | 5.354765  | 0.710640  | -1.357582 |
| H       | -6.116721 | 1.157996  | 1.028822   | C       | 2.099580  | -0.206879 | 0.370631  | H       | 6.233632  | -2.009779 | 0.367732  |
| H       | -5.856791 | 2.402079  | -0.209611  | O       | -0.781046 | 2.800561  | -0.750130 | H       | 6.740493  | -0.457544 | 0.004370  |
| N       | 0.850037  | -0.515564 | -0.446580  | H       | 2.504356  | 0.804714  | 0.488110  | O       | 0.728327  | 2.301682  | 0.940113  |
| H       | 0.626527  | -0.029049 | -1.309135  | H       | 1.998148  | -0.608196 | 1.385565  | C       | 1.216327  | 3.629974  | 0.741497  |
| C       | 1.999343  | 0.012682  | 0.255471   | C       | 3.124446  | -1.028785 | -0.366915 | H       | 2.036276  | 3.750671  | 1.448012  |
| H       | 1.758293  | 0.059880  | 1.324533   | C       | 2.991494  | -1.491760 | -1.475561 | H       | 1.572133  | 3.756985  | -0.283474 |
| C       | 3.245249  | -0.895535 | 0.079018   | O       | 0.962327  | 2.659473  | 0.661186  | H       | 0.427472  | 4.359941  | 0.936920  |
| C       | 2.207162  | 1.415005  | -0.285217  | C       | 1.247907  | 4.032310  | 0.381818  |         |           |           |           |
| H       | 2.862489  | -1.899624 | 0.299733   | H       | 2.129287  | 4.276195  | 0.973377  | 45      |           |           |           |
| C       | 3.771166  | -0.874425 | -1.352693  | H       | 1.445979  | 4.174684  | -0.682987 | 'AlaAsn |           |           |           |
| C       | 4.336636  | -0.582742 | 1.096571   | H       | 0.404427  | 4.663035  | -0.671295 | N       | 3.121749  | 1.817416  | 0.119939  |
| O       | 1.706873  | 1.819813  | -1.313119  | O       | 4.239977  | -1.176808 | 0.367511  | C       | 3.288012  | 0.375771  | -0.027931 |
| H       | 4.203515  | 0.099613  | -1.610591  | C       | 5.274673  | -1.929804 | -0.260967 | H       | 3.950413  | 0.094303  | -0.857804 |
| H       | 4.557411  | -1.624582 | -1.478769  | C       | 6.095346  | -1.963163 | 0.455192  | C       | 3.857296  | -0.211235 | 1.261055  |
| H       | 2.982446  | -1.094971 | -2.078793  | H       | 4.929905  | -2.940157 | -0.494700 | C       | 1.940330  | -0.284670 | -0.363988 |
| H       | 3.949472  | -0.633102 | 2.119048   | H       | 5.595702  | -1.448484 | -1.188345 | H       | 3.216233  | 0.048315  | 2.109796  |
| H       | 5.146235  | -1.313855 | 1.009478   |         |           |           |           | H       | 3.920159  | -1.297842 | 1.182903  |
| H       | 4.762553  | 0.412931  | 0.944007   | 43      |           |           |           | H       | 4.861579  | 0.184132  | 1.448327  |
| O       | 3.011361  | 2.140390  | 0.488018   | 'AlaAla |           |           |           | S       | 1.859754  | -1.813124 | -0.988790 |
| C       | 3.268462  | 3.468642  | 0.021249   | N       | 1.981403  | 2.142671  | -0.253741 | H       | 3.872108  | 2.212382  | 0.673986  |
| H       | 3.932146  | 3.915593  | 0.759779   | C       | 2.587505  | 0.815617  | -0.269793 | H       | 3.129932  | 2.281499  | -0.781772 |
| H       | 3.744755  | 3.443850  | -0.961400  | H       | 3.216344  | 0.632408  | -1.151591 | N       | 0.900309  | 0.471538  | -0.004600 |
| H       | 2.336159  | 4.032863  | -0.050283  | C       | 3.444559  | 0.625595  | 0.979310  | H       | 1.129534  | 1.421568  | 0.299608  |
|         |           |           |            | C       | 1.500594  | -0.262736 | -0.306461 | C       | -0.483874 | 0.131933  | -0.213887 |
| 41      |           |           |            | H       | 2.843871  | 0.794282  | 1.878911  | H       | -0.615346 | -0.302531 | -1.217092 |
| 'AlaAsp |           |           |            | H       | 3.847200  | -0.388189 | 1.007983  | C       | -0.997848 | -0.923808 | 0.770196  |
| N       | 3.576271  | 1.548147  | 0.053057   | H       | 4.280128  | 1.333998  | 0.978642  | C       | -1.267713 | 1.430714  | -0.141672 |
| C       | 3.583846  | 0.097300  | -0.097255  | S       | 1.847906  | -1.824863 | -0.765768 | H       | -0.197872 | -1.666185 | 0.883294  |
| H       | 4.190906  | -0.252063 | -0.943397  | H       | 2.612345  | 2.822375  | 0.153543  | H       | -1.204150 | -0.491404 | 1.755318  |
| C       | 4.118698  | -0.550590 | 1.177648   | H       | 1.758870  | 2.455332  | -1.192382 | C       | -2.206915 | -1.664327 | 0.219503  |
| C       | 2.165710  | -0.413918 | -0.367123  | N       | 0.310485  | 0.180081  | 0.080918  | O       | -0.761098 | 2.527678  | -0.060263 |
| H       | 3.529705  | -0.227203 | 2.041987   | C       | 0.248697  | 1.186053  | 0.256459  | O       | -2.453391 | -1.732108 | -0.970319 |
| H       | 4.064099  | -1.637520 | 1.098867   | C       | -0.886278 | -0.618697 | 0.135487  | N       | -2.980192 | -2.268347 | 1.163023  |
| H       | 5.163349  | -0.263655 | 1.339196   | H       | -0.860422 | -1.326816 | -0.703569 | H       | -3.697742 | -2.895213 | 0.836520  |
| S       | 1.894426  | -1.928685 | -0.998816  | C       | -0.995989 | -1.418421 | 1.436938  | H       | -2.687358 | -2.334532 | 2.122501  |
| H       | 4.364358  | 1.858349  | 0.608517   | C       | -2.068767 | 0.313193  | -0.038900 | O       | -2.581091 | 1.216703  | -0.169634 |
| H       | 3.633918  | 2.011561  | -0.846994  | H       | -1.017915 | -0.748261 | 2.301341  | C       | -3.389907 | 2.392608  | -0.131855 |
| N       | 1.221901  | 0.454483  | -0.019122  | H       | -1.904400 | -2.024765 | 1.433284  | H       | -4.419953 | 2.041057  | -0.168048 |
| H       | 1.554845  | 1.371301  | 0.291428   | H       | -0.128611 | -2.077284 | 1.516138  | H       | -3.205673 | 2.957005  | 0.785463  |
| C       | -0.191777 | 0.235055  | -0.158978  | O       | -2.001889 | 1.521223  | -0.040530 | H       | -3.172628 | 3.033075  | -0.989689 |
| H       | -0.380743 | -0.301991 | -1.097351  | O       | -3.206065 | -0.374251 | -0.171558 |         |           |           |           |

|         |           |           |           |           |           |           |           |          |           |           |           |
|---------|-----------|-----------|-----------|-----------|-----------|-----------|-----------|----------|-----------|-----------|-----------|
| 46      |           |           | H         | -1.936524 | -2.431746 | 0.754685  | H         | 2.888508 | 3.045163  | 1.524791  |           |
| 'AlaCys |           |           | H         | -2.282222 | -2.752608 | -0.806852 | H         | 3.457964 | 3.585922  | -0.053003 |           |
| N       | 2.698009  | -1.980291 | -0.502858 | N         | -0.174383 | -0.116499 | -0.104163 | H        | 1.764457  | 3.815055  | 0.396118  |
| C       | 3.066306  | -0.666726 | 0.015361  | H         | -0.063970 | -1.130124 | -0.189201 | O        | 2.577457  | -1.236184 | -0.777654 |
| H       | 3.707819  | -0.713727 | 0.905646  | C         | 0.984074  | 0.717154  | -0.009037 | C        | 3.456163  | -2.348194 | -0.596673 |
| C       | 3.798918  | 0.126883  | -1.063742 | C         | 2.219420  | -0.147831 | 0.010502  | H        | 4.356182  | -2.107442 | -1.160854 |
| C       | 1.814517  | 0.103622  | 0.447282  | H         | 1.035496  | 1.424212  | -0.847978 | H        | 3.690098  | -2.485658 | 0.461631  |
| H       | 3.183335  | 0.195146  | -1.966601 | H         | 0.949920  | 1.341346  | 0.893403  | H        | 2.997194  | -3.263524 | -0.977298 |
| H       | 4.016576  | 1.134854  | -0.707384 | O         | 2.217821  | -1.355288 | -0.053389 |          |           |           |           |
| H       | 4.742956  | -0.365449 | -1.320552 | O         | 3.319071  | 0.602030  | 0.106971  |          |           |           |           |
| S       | 1.916326  | 1.446434  | 1.424120  | C         | 4.547669  | -0.126316 | 0.129941  | 51       |           |           |           |
| H       | 3.395298  | -2.319912 | -1.154308 | H         | 4.664289  | -0.710697 | -0.785743 | 'AlaHis  |           |           |           |
| H       | 2.620194  | -2.660989 | 0.244611  | H         | 5.333661  | 0.623523  | 0.208387  | N        | -3.817608 | 0.639333  | -0.535864 |
| N       | 0.692537  | -0.397375 | -0.060718 | H         | 4.576109  | -0.803592 | 0.986745  | C        | -3.498774 | -0.704409 | -0.056228 |
| H       | 0.804338  | -1.235722 | -0.636754 |           |           |           |           | H        | -4.078858 | -0.996768 | 0.828790  |
| C       | -0.624481 | 0.152769  | 0.146308  | 49        |           |           |           | C        | -3.757727 | -1.723727 | -1.162646 |
| H       | -0.666680 | 0.584843  | 1.151115  | 'AlaGln   |           |           |           | C        | -2.028702 | -0.777211 | 0.367305  |
| C       | -0.886953 | 1.252216  | -0.897373 | N         | 3.541292  | 0.943774  | 1.145597  | H        | -3.186508 | -1.463773 | -2.059813 |
| C       | -1.618257 | -0.985476 | 0.005604  | C         | 3.543887  | -0.151607 | 0.176584  | H        | -3.460018 | -2.720153 | -0.832371 |
| H       | -0.078051 | 1.982926  | -0.823913 | H         | 4.134458  | 0.162864  | -0.692628 | H        | -4.822346 | -1.744610 | -1.419364 |
| H       | -0.866072 | 0.808754  | -1.897127 | C         | 4.144531  | -1.441918 | 0.726976  | S        | -1.460489 | -1.995279 | 1.340542  |
| S       | -2.496219 | 2.084745  | -0.764890 | C         | 2.131169  | -0.379147 | -0.384868 | H        | -4.604123 | 0.614352  | -1.174131 |
| O       | -1.511654 | -1.856839 | -0.828142 | H         | 3.577257  | -1.781930 | 1.601142  | H        | -4.069914 | 1.247736  | 0.235450  |
| H       | -2.273473 | 2.657017  | 0.431894  | H         | 4.113700  | -2.234446 | -0.022276 | N        | -1.292433 | 0.203413  | -0.152886 |
| O       | -2.606347 | -0.900292 | 0.890729  | H         | 5.181895  | -1.271013 | 1.030687  | H        | -1.837999 | 0.892054  | -0.673978 |
| C       | -3.625258 | -1.894096 | 0.758009  | S         | 1.801355  | -1.588437 | -1.486302 | C        | 0.124654  | 0.358726  | 0.067506  |
| H       | -4.347694 | -1.681603 | 1.544538  | H         | 3.562801  | 0.584034  | 2.093791  | H        | 0.329398  | -0.018141 | 1.082782  |
| H       | -4.096548 | -1.825804 | -0.224929 | H         | 4.348906  | 1.541326  | 1.028579  | C        | 0.956939  | -0.488587 | -0.920219 |
| H       | -3.202296 | -2.893661 | 0.881722  | N         | 1.244281  | 0.498066  | 0.063541  | C        | 0.501149  | 1.829445  | 0.039036  |
|         |           |           |           | H         | 1.618804  | 1.232009  | 0.672372  | H        | 0.415451  | -1.431129 | -1.035435 |
| 47      |           |           |           | H         | 1.618804  | 1.232009  | 0.672372  | H        | 0.961660  | 0.008365  | -1.898801 |
| 'AlaPhe |           |           |           | C         | -0.132691 | 0.549116  | -0.354209 | C        | 2.338258  | -0.831573 | -0.479826 |
| N       | 3.972473  | 1.230788  | 0.755382  | H         | -0.171011 | 0.325383  | -1.429099 | O        | 1.584463  | 2.262077  | -0.292889 |
| C       | 3.953551  | -0.036485 | 0.024977  | C         | -0.993211 | -0.488204 | 0.398493  | N        | 3.357113  | 0.080352  | -0.345774 |
| H       | 4.411956  | 0.132233  | -0.957473 | C         | -0.620916 | 1.962755  | -0.108040 | C        | 2.914024  | -2.039823 | -0.165800 |
| C       | 4.719626  | -1.152087 | 0.728922  | H         | -0.368811 | -1.378580 | 0.518908  | H        | 3.223592  | 1.077795  | -0.441776 |
| C       | 2.508062  | -0.450787 | -0.298440 | H         | -1.245133 | -0.128285 | 1.400966  | C        | 4.464264  | -0.600498 | 0.041463  |
| H       | 4.289028  | -1.343579 | 1.186444  | C         | -2.267168 | -0.873148 | -0.338453 | N        | 4.236384  | -1.889045 | 0.154857  |
| H       | 4.667319  | -2.079118 | 0.156051  | O         | -0.041883 | 2.780660  | 0.568943  | H        | 2.434362  | -3.009740 | -0.157418 |
| H       | 5.767648  | -0.863549 | 0.855650  | H         | -2.836509 | 0.023863  | -0.610076 | H        | 5.409868  | -0.108910 | 0.227547  |
| S       | 2.148381  | -1.897114 | -1.047590 | H         | -2.017191 | -1.387501 | -1.274207 | O        | -0.497053 | 2.617795  | 0.444744  |
| H       | 4.117207  | 1.069020  | 1.746396  | C         | -3.170599 | -1.726110 | 0.536136  | C        | -0.190068 | 4.014129  | 0.487141  |
| H       | 4.722220  | 1.829029  | 0.433873  | O         | -3.251806 | -1.571258 | 1.743212  | H        | -1.100437 | 4.504629  | 0.828659  |
| N       | 1.616364  | 0.472963  | 0.034699  | N         | -3.922278 | -2.642022 | -0.131117 | H        | 0.631665  | 4.202114  | 1.181533  |
| H       | 2.001922  | 1.328585  | 0.445296  | H         | -4.517959 | -3.245588 | 0.411817  | H        | 0.094461  | 4.374465  | -0.503915 |
| C       | 0.200770  | 0.371480  | -0.204354 | H         | -3.769904 | -2.853170 | -1.101522 |          |           |           |           |
| H       | 0.040807  | -0.143092 | -1.158314 | O         | -1.791610 | 2.190954  | -0.712464 | 52       |           |           |           |
| C       | -0.489926 | -0.441588 | 0.920155  | C         | -2.351382 | 3.484846  | -0.473723 | 'AlaLeu  |           |           |           |
| C       | -0.353334 | 1.779935  | -0.265937 | H         | -3.287434 | 3.508242  | -1.030035 | N        | 3.175780  | 1.671455  | 0.642801  |
| H       | 0.098702  | -1.359885 | 0.1019520 | H         | -2.534363 | 3.631956  | 0.593113  | C        | 3.322366  | 0.345869  | 0.050703  |
| H       | -0.397217 | 0.118555  | 1.857254  | H         | -1.673588 | 4.264758  | -0.827733 | H        | 3.984146  | 0.329802  | -0.825941 |
| C       | -1.927524 | -0.782665 | 0.638818  |           |           |           |           | C        | 3.878758  | -0.623686 | 1.090442  |
| O       | 0.143011  | 2.727985  | 0.301386  | 50        |           |           |           | C        | 1.967075  | -0.166810 | -0.446125 |
| C       | -2.969493 | -0.155034 | 1.323562  | 'AlaIle   |           |           |           | H        | 3.237484  | -0.635630 | 1.977767  |
| C       | -2.240902 | -1.744487 | -0.326753 | N         | -2.932294 | -1.823994 | 0.631078  | H        | 3.927186  | -1.631718 | 0.675598  |
| H       | -2.737811 | 0.588677  | 2.083036  | C         | -3.193342 | -0.517879 | 0.035342  | H        | 4.887260  | -0.320250 | 1.391845  |
| C       | -4.296549 | -0.476760 | 1.051364  | H         | -3.886608 | -0.556420 | -0.815780 | S        | 1.866904  | -1.433786 | -1.522346 |
| C       | -3.565279 | -2.065256 | -0.603017 | C         | -3.777369 | 0.420566  | 1.088434  | H        | 3.922061  | 1.855923  | 1.302346  |
| H       | -1.434018 | -2.245653 | -0.857429 | C         | -1.896804 | 0.083532  | -0.515267 | H        | 3.209221  | 2.395062  | -0.066858 |
| H       | -5.095411 | 0.016952  | 1.597766  | H         | -3.106670 | 0.484119  | 1.951537  | N        | 0.936731  | 0.478433  | 0.086355  |
| C       | -4.597845 | -1.431701 | 0.085257  | H         | -3.910036 | 1.419286  | 0.669382  | H        | 1.173324  | 1.261667  | 0.700269  |
| H       | -3.792723 | -2.816697 | -1.353885 | H         | -4.751008 | 0.051437  | 1.428723  | C        | -0.450530 | 0.189596  | -0.182768 |
| H       | -5.632274 | -1.685831 | -0.127568 | S         | -1.925883 | 1.330771  | -1.618217 | H        | -0.528389 | -0.154268 | -1.220082 |
| O       | -1.470368 | 1.834141  | -0.987745 | H         | -3.638385 | -2.053468 | 1.320081  | C        | -0.962906 | -0.916246 | 0.762640  |
| C       | -2.116238 | 3.107388  | -1.016073 | H         | -2.941489 | -2.555352 | -0.071308 | C        | -1.217005 | 1.484334  | -0.005620 |
| H       | -3.008439 | 2.970637  | -1.625223 | N         | -0.803494 | -0.471962 | -0.005925 | H        | -0.265735 | -1.754304 | 0.637968  |
| H       | -2.386605 | 3.422259  | -0.005455 | H         | -0.959965 | -1.277030 | 0.605184  | H        | -0.853473 | -0.554776 | 1.793322  |
| H       | -1.458940 | 3.860297  | -1.457283 | C         | 0.546227  | -0.102528 | -0.351401 | C        | -2.391341 | -1.421288 | 0.537009  |
|         |           |           |           | H         | 0.559108  | 0.183415  | -1.410814 | O        | -0.842165 | 2.411919  | 0.675436  |
| 48      |           |           |           | C         | 1.034053  | 1.118533  | 0.476114  | H        | -3.089023 | -0.588317 | 0.698219  |
| 'AlaGly |           |           |           | C         | 1.403972  | -1.335659 | -0.147113 | C        | -2.601694 | -1.947336 | -0.881455 |
| N       | -1.838185 | -2.081433 | -0.193053 | H         | 0.207691  | 1.835714  | 0.380360  | C        | -2.705705 | -2.503993 | 1.568306  |
| C       | -2.466657 | -0.765827 | -0.315194 | C         | 1.208525  | 0.763896  | 1.949954  | H        | -1.853476 | -2.708486 | -1.130937 |
| H       | -2.811900 | -0.660746 | -1.351606 | C         | 2.274176  | 1.770323  | -0.141070 | H        | -3.592188 | -2.403630 | -0.980478 |
| C       | -3.660431 | -0.568272 | 0.613582  | O         | 1.076647  | -2.292442 | 0.518620  | H        | -2.533361 | -1.149694 | -1.626419 |
| C       | -1.417889 | 0.344251  | -0.149021 | H         | 2.068858  | 0.101844  | 2.105754  | H        | -2.572217 | -2.137803 | 2.591975  |
| H       | -3.350812 | -0.675168 | 1.659603  | H         | 1.368945  | 1.661567  | 2.552763  | H        | -3.738436 | -2.853167 | 1.468181  |
| H       | -4.086549 | 0.428800  | 0.492045  | H         | 0.322138  | 0.258031  | 2.345028  | H        | -2.047551 | -3.370598 | 1.435057  |
| H       | -4.428176 | -1.318528 | 0.400241  | H         | 3.133927  | 1.096255  | -0.049302 | O        | -2.373164 | 1.470575  | -0.675430 |
| S       | -1.815224 | 1.959873  | -0.090407 | H         | 2.098633  | 1.897834  | -1.216713 | C        | -3.179517 | 2.639308  | -0.513947 |
|         |           |           |           | C         | 2.613109  | 3.126013  | 0.468580  | H        | -4.076499 | 2.462873  | -1.105932 |

|                     |           |           |           |                     |                     |           |           |           |                     |           |           |           |
|---------------------|-----------|-----------|-----------|---------------------|---------------------|-----------|-----------|-----------|---------------------|-----------|-----------|-----------|
| H                   | -3.434946 | 2.787831  | 0.537837  | <sup>1</sup> AlaPro | N                   | -0.347086 | -1.632804 | 1.354324  | C                   | 0.176030  | 1.865947  | -0.230989 |
| H                   | -2.647800 | 3.522423  | -0.875458 |                     | C                   | 0.897157  | -1.756662 | 0.604078  | H                   | 0.322778  | -1.328834 | 0.988816  |
| 53                  |           |           |           |                     | H                   | 1.702617  | -2.194730 | 1.210031  | C                   | -0.025794 | 0.171632  | 1.856863  |
| <sup>1</sup> AlaLys |           |           |           |                     | C                   | 0.686588  | -2.683140 | -0.594655 | C                   | -1.644781 | -0.560517 | 0.640857  |
| N                   | -3.976047 | 0.380607  | -0.988441 |                     | C                   | 1.494492  | -0.418299 | 0.154846  | O                   | 0.790823  | 2.745310  | 0.331605  |
| C                   | -3.664397 | -0.824154 | -0.226429 |                     | H                   | -0.086238 | -2.288935 | -1.257094 | C                   | -2.622932 | 0.145724  | 1.338540  |
| H                   | -4.367681 | -1.015626 | 0.595384  |                     | H                   | 1.620333  | -2.785703 | -1.148774 | C                   | -2.062681 | -1.476804 | -0.331862 |
| C                   | -3.668744 | -2.035914 | -1.155109 |                     | H                   | 0.385693  | -3.675219 | -0.237463 | H                   | -2.327197 | 0.857526  | 2.106110  |
| C                   | -2.287015 | -0.694951 | 0.430929  |                     | S                   | 3.106620  | -0.446973 | -0.292936 | C                   | -3.976974 | -0.048153 | 1.080685  |
| H                   | -2.971891 | -1.878577 | -1.984720 |                     | H                   | -0.820203 | -2.529285 | 1.373161  | C                   | -3.407116 | -1.678439 | -0.603520 |
| H                   | -3.369428 | -2.930515 | -0.606809 |                     | H                   | -0.161211 | -1.378735 | 2.318919  | H                   | -1.314674 | -2.045624 | -0.880342 |
| H                   | -4.671457 | -2.196145 | -1.566095 |                     | N                   | 0.782278  | 0.721417  | 0.136001  | H                   | -4.724658 | 0.508610  | 1.642617  |
| S                   | -1.830000 | -1.693959 | 1.682167  |                     | C                   | 1.446159  | 1.981931  | -0.227231 | C                   | -4.373593 | -0.961442 | 0.105030  |
| H                   | -4.648708 | 0.180667  | -1.718906 |                     | C                   | -0.635875 | 0.952458  | 0.452601  | H                   | -3.730470 | -2.391610 | -1.354773 |
| H                   | -4.375521 | 1.097467  | -0.592774 |                     | H                   | 1.618570  | 1.999565  | -1.310498 | O                   | -5.676733 | -1.198475 | -0.195817 |
| N                   | -1.531545 | 0.249204  | -0.116735 |                     | H                   | 2.427258  | 2.022976  | 0.251270  | H                   | -6.231821 | -0.653531 | 0.370910  |
| H                   | -1.978107 | 0.807948  | -0.847822 |                     | C                   | 0.478703  | 3.062944  | 0.226524  | O                   | -0.950755 | 2.054918  | -0.914177 |
| C                   | -0.188580 | 0.573059  | 0.295772  |                     | C                   | -0.875844 | 2.407516  | 0.011699  | C                   | -1.448462 | 3.393165  | -0.907897 |
| H                   | -0.117354 | 0.421261  | 1.379971  |                     | H                   | -0.818098 | 0.849737  | 1.525016  | H                   | -1.645264 | 3.724517  | 0.114437  |
| C                   | 0.841153  | -0.342002 | -0.397921 |                     | C                   | -1.599513 | 0.050764  | -0.284012 | H                   | -0.725955 | 4.072714  | -1.366003 |
| C                   | 0.034016  | 2.034719  | -0.037967 |                     | H                   | 0.601634  | 3.990597  | -0.337551 | H                   | -2.371026 | 3.366234  | -1.485856 |
| H                   | 0.456029  | -1.361166 | -0.281377 |                     | H                   | 0.631626  | 3.289469  | 1.287758  | 58                  |           |           |           |
| H                   | 0.843705  | -0.117357 | -1.472617 |                     | H                   | -1.134616 | 2.424597  | -1.053206 | <sup>1</sup> AlaThr |           |           |           |
| C                   | 2.253040  | -0.273819 | 0.172226  |                     | H                   | -1.696154 | 2.861119  | 0.572206  | N                   | 2.128545  | -1.777693 | -1.336184 |
| O                   | -0.598470 | 2.647747  | -0.868292 |                     | O                   | -1.416427 | -0.438338 | -1.372639 | C                   | 2.692261  | -0.986586 | -0.248434 |
| H                   | 2.652044  | 0.743799  | 0.084964  |                     | O                   | -2.768401 | 0.008797  | 0.372329  | H                   | 3.211242  | -1.589217 | 0.509486  |
| H                   | 2.211814  | -0.495017 | 1.247372  |                     | C                   | -3.789936 | -0.738070 | -0.281770 | C                   | 3.681107  | 0.030944  | -0.811883 |
| C                   | 3.196101  | -1.257094 | -0.512559 |                     | H                   | -3.504158 | -1.790680 | -0.357859 | C                   | 1.575891  | -0.256482 | 0.504912  |
| H                   | 2.817397  | -2.281686 | -0.416885 |                     | H                   | -4.680798 | -0.631381 | 0.336748  | H                   | 3.194598  | 0.647537  | -1.574578 |
| H                   | 3.229565  | -1.040146 | -1.590761 |                     | H                   | -3.971487 | -0.352453 | -1.287954 | H                   | 4.051149  | 0.676749  | -0.013908 |
| C                   | 4.610885  | -1.212844 | 0.047273  |                     | 56                  |           |           |           | H                   | 4.533823  | -0.481414 | -1.270434 |
| H                   | 4.986451  | -0.173746 | -0.010140 |                     | <sup>1</sup> AlaSer |           |           |           | S                   | 1.834147  | 0.368395  | 2.026350  |
| H                   | 4.578601  | -1.468096 | 1.114107  |                     | N                   | -2.259141 | -2.153162 | 0.169856  | H                   | 2.833204  | -1.987698 | -2.032718 |
| N                   | 5.456729  | -2.192209 | -0.620843 |                     | C                   | -2.786057 | -0.831330 | -0.152943 | H                   | 1.756304  | -2.657645 | -0.995339 |
| H                   | 5.583752  | -1.926596 | -1.592893 |                     | H                   | -3.401397 | -0.816712 | -1.062745 | N                   | 0.447817  | -0.174003 | -0.193623 |
| H                   | 6.382102  | -2.195711 | -0.204974 |                     | C                   | -3.634159 | -0.317937 | 1.008144  | H                   | 0.462473  | -0.671601 | -1.085588 |
| O                   | 1.029518  | 2.563406  | 0.679101  |                     | C                   | -1.638649 | 0.149831  | -0.415657 | C                   | -0.791545 | 0.367071  | 0.285480  |
| C                   | 1.327115  | 3.929205  | 0.382673  |                     | H                   | -3.048411 | -0.317799 | 1.933193  | H                   | -0.662960 | 0.585630  | 1.353629  |
| H                   | 2.162006  | 4.196096  | 1.029224  |                     | H                   | -3.974415 | 0.698486  | 0.804298  | C                   | -1.186989 | 1.660833  | -0.437520 |
| H                   | 1.600989  | 4.044402  | -0.668645 |                     | H                   | -4.510841 | -0.959123 | 1.149856  | C                   | -1.875152 | -0.689000 | 0.121518  |
| H                   | 0.461891  | 4.562420  | 0.592065  |                     | S                   | -1.902048 | 1.598215  | -1.190148 | H                   | -2.127578 | 2.000133  | 0.021750  |
| 54                  |           |           |           |                     | H                   | -2.924308 | -2.682017 | 0.721018  | C                   | -0.132380 | 2.744688  | -0.308430 |
| <sup>1</sup> AlaMet |           |           |           |                     | H                   | -2.066045 | -2.686231 | -0.670833 | O                   | -1.401510 | 1.285258  | -1.787653 |
| N                   | -3.859802 | 0.759617  | -0.818263 |                     | N                   | -0.471745 | -0.275351 | 0.058006  | O                   | -1.711171 | -1.779812 | -0.367600 |
| C                   | -3.621397 | -0.512936 | -0.145549 |                     | H                   | -0.480042 | -1.204713 | 0.486028  | H                   | 0.805875  | 2.418895  | -0.765055 |
| H                   | -4.307100 | -0.700074 | 0.691828  |                     | C                   | 0.774957  | 0.439884  | -0.032164 | H                   | -0.464896 | 3.658970  | -0.813314 |
| C                   | -3.759231 | -1.658251 | -1.145843 |                     | H                   | 0.792370  | 1.028110  | -0.954592 | H                   | 0.062228  | 2.985151  | 0.740200  |
| C                   | -2.213874 | -0.536964 | 0.457214  |                     | C                   | 0.916467  | 1.392372  | 1.161680  | H                   | -1.600758 | 2.080694  | -2.290875 |
| H                   | -3.082820 | -1.503647 | -1.992645 |                     | C                   | 1.893877  | -0.584444 | -0.022912 | O                   | -3.042231 | -0.249637 | 0.607348  |
| H                   | -3.514743 | -2.607784 | -0.667113 |                     | H                   | 0.083282  | 2.105336  | 1.099327  | C                   | -4.127485 | -1.168016 | 0.481359  |
| H                   | -4.786178 | -1.710799 | -1.523318 |                     | H                   | 0.806522  | 0.801575  | 2.084951  | H                   | -4.992083 | -0.666919 | 0.915297  |
| S                   | -1.790300 | -1.638539 | 1.630445  |                     | O                   | 2.174002  | 2.016093  | 1.078103  | H                   | -4.307574 | -1.405048 | -0.569869 |
| H                   | -4.567970 | 0.661700  | -1.535771 |                     | O                   | 1.838208  | -1.623359 | 0.597754  | H                   | -3.910898 | -2.093830 | 1.019585  |
| H                   | -4.180964 | 1.465474  | -0.164973 |                     | H                   | 2.197302  | 2.727416  | 1.723938  | 59                  |           |           |           |
| N                   | -1.401916 | 0.370335  | -0.073748 |                     | O                   | 2.931522  | -0.198180 | -0.757848 | <sup>1</sup> AlaTrp |           |           |           |
| H                   | -1.829844 | 1.014507  | -0.743348 |                     | C                   | 4.056989  | -1.075957 | -0.721734 | N                   | 4.760647  | 0.635336  | -0.015818 |
| C                   | -0.022264 | 0.549201  | 0.296781  |                     | H                   | 4.808518  | -0.617835 | -1.363127 | C                   | 4.318186  | -0.755133 | -0.016284 |
| H                   | 0.072532  | 0.349617  | 1.372196  |                     | H                   | 4.431968  | -1.173112 | 0.299767  | H                   | 4.780446  | -1.360475 | -0.807853 |
| C                   | 0.888074  | -0.436532 | -0.468159 |                     | H                   | 3.784054  | -2.066173 | -1.094281 | C                   | 4.640632  | -1.397337 | 1.330715  |
| C                   | 0.331329  | 1.995878  | 0.010061  |                     | 57                  |           |           |           | C                   | 2.808466  | -0.832390 | -0.264953 |
| H                   | 0.376161  | -1.403847 | -0.441755 |                     | <sup>1</sup> AlaTyr |           |           |           | H                   | 4.189302  | -0.818091 | 2.142765  |
| H                   | 0.955963  | -0.125637 | -1.517642 |                     | N                   | 4.506430  | 0.955931  | 0.333202  | H                   | 4.251622  | -2.416160 | 1.364436  |
| C                   | 2.273629  | -0.593522 | 0.141076  |                     | C                   | 4.250495  | -0.450225 | 0.040139  | H                   | 5.724512  | -1.431001 | 1.485601  |
| O                   | -0.314740 | 2.727513  | -0.704544 |                     | H                   | 4.842731  | -0.836965 | -0.800264 | S                   | 2.086188  | -2.260557 | -0.727569 |
| H                   | 2.799768  | 0.364458  | 0.184128  |                     | C                   | 4.556732  | -1.296324 | 1.273578  | H                   | 5.615291  | 0.741172  | 0.517437  |
| H                   | 2.182415  | -0.982024 | 1.162219  |                     | C                   | 2.785697  | -0.650403 | -0.358846 | H                   | 4.945570  | 0.961175  | -0.958104 |
| S                   | 3.242371  | -1.763498 | -0.858085 |                     | H                   | 3.976306  | -0.938891 | 2.130314  | N                   | 2.182678  | 0.317155  | -0.046914 |
| C                   | 4.762187  | -1.791225 | 0.119253  |                     | H                   | 4.303539  | -2.340859 | 1.085506  | H                   | 2.780859  | 1.106144  | 0.210398  |
| H                   | 4.578076  | -2.167568 | 1.129373  |                     | H                   | 5.621741  | -1.233474 | 1.521962  | C                   | 0.761338  | 0.524477  | -0.160386 |
| H                   | 5.456250  | -2.467990 | -0.383719 |                     | S                   | 2.286080  | -2.031054 | -1.145861 | H                   | 0.376109  | -0.099328 | -0.973031 |
| H                   | 5.220195  | -0.799530 | 0.174370  |                     | H                   | 5.301617  | 1.055781  | 0.952642  | C                   | 0.046399  | 0.137013  | 1.160094  |
| O                   | 1.457992  | 2.362072  | 0.628197  |                     | H                   | 4.711420  | 1.475194  | -0.513371 | C                   | 0.541451  | 1.989678  | -0.471641 |
| C                   | 1.879205  | 3.703914  | 0.370352  |                     | N                   | 1.999162  | 0.353187  | 0.010408  | H                   | 0.372411  | -0.885955 | 1.381654  |
| H                   | 2.800598  | 3.837132  | 0.935550  |                     | H                   | 2.466365  | 1.146445  | 0.456372  | H                   | 0.431319  | 0.785199  | 1.955449  |
| H                   | 2.056730  | 3.852308  | -0.697226 |                     | C                   | 0.576827  | 0.405808  | -0.206472 | C                   | -1.441496 | 0.206283  | 1.098969  |
| H                   | 1.117863  | 4.412582  | 0.703818  |                     | H                   | 0.351155  | -0.066991 | -1.168546 | O                   | 1.272191  | 2.876763  | -0.087308 |
| 55                  |           |           |           |                     | C                   | -0.179892 | -0.358814 | 0.910465  | C                   | -2.250831 | 1.115179  | 1.726756  |
|                     |           |           |           |                     |                     |           |           |           | C                   | -2.094113 | -1.781897 | -0.464736 |

|                     |           |           |           |                     |           |           |            |                     |           |           |           |
|---------------------|-----------|-----------|-----------|---------------------|-----------|-----------|------------|---------------------|-----------|-----------|-----------|
| C                   | -2.312065 | -0.666131 | 0.357345  | H                   | -0.293684 | 0.478373  | -1.704465  | H                   | -1.303363 | -2.622641 | 0.484369  |
| H                   | -1.984152 | 1.930705  | 2.385626  | C                   | -1.731520 | -0.001574 | -0.281874  | C                   | -1.617338 | -0.648535 | -0.328070 |
| N                   | -3.567301 | 0.865202  | 1.417755  | H                   | -1.548821 | -0.156317 | 0.788638   | C                   | -1.016104 | -0.162818 | 0.454276  |
| C                   | -3.638319 | -0.223351 | 0.583230  | C                   | -3.113342 | 0.661374  | -0.438050  | H                   | -1.431575 | -0.093573 | -1.257402 |
| C                   | -3.188463 | -2.413504 | -1.032254 | C                   | -1.672296 | -1.328628 | -1.017768  | C                   | -3.094223 | -0.537352 | 0.022306  |
| H                   | -1.084548 | -2.144180 | -0.646733 | H                   | -3.027495 | 1.657071  | 0.012792   | H                   | -3.719606 | -0.941101 | -0.778123 |
| H                   | -4.355060 | 1.368128  | 1.786052  | C                   | -3.378563 | 0.769456  | -1.491801  | H                   | -3.318914 | -1.139189 | 0.917028  |
| C                   | -4.742880 | -0.858434 | 0.013305  | H                   | -4.236462 | -0.069801 | 1.535233   | N                   | -3.478656 | 0.847794  | 0.198839  |
| C                   | -4.497527 | -1.956269 | -0.796336 | O                   | -0.967503 | -1.537353 | -1.980517  | H                   | -2.918150 | 1.351870  | 0.871221  |
| H                   | -3.036272 | -3.278968 | -1.670290 | O                   | -5.292017 | -0.358190 | -0.254600  | C                   | -4.819401 | 1.179215  | 0.189141  |
| H                   | -5.755240 | -0.508999 | 0.196459  | O                   | -2.509779 | -2.216052 | -0.490844  | N                   | -5.706374 | 0.295406  | -0.083626 |
| H                   | -5.333899 | -2.474865 | -1.256022 | C                   | -2.581548 | -3.472449 | -1.172356  | N                   | -5.055088 | 2.534139  | 0.403135  |
| O                   | -0.564814 | 2.183932  | -1.185847 | H                   | -3.317387 | -4.060169 | -0.626237  | H                   | -6.619420 | 0.732726  | -0.188104 |
| C                   | -0.891299 | 3.549985  | -1.439099 | H                   | -2.898160 | -3.325842 | -2.207067  | H                   | -4.289723 | 3.092739  | 0.747516  |
| H                   | -1.053351 | 4.085152  | -0.500245 | H                   | -1.607323 | -3.965848 | -1.162148  | H                   | -5.936760 | 2.748285  | 0.840067  |
| H                   | -0.086294 | 4.041497  | -1.990461 | O                   | -3.926778 | -0.328586 | 1.533738   | S                   | 1.528420  | -2.239000 | 1.555641  |
| H                   | -1.805698 | 3.529339  | -2.030293 | C                   | -4.934707 | -1.017608 | 2.269410   | H                   | 1.464722  | -3.856436 | -1.441074 |
|                     |           |           |           | H                   | -5.135094 | -1.994121 | 1.821132   | H                   | 0.476819  | -4.152929 | -0.190897 |
|                     |           |           |           | H                   | -4.539506 | -1.133415 | 3.277982   | N                   | 1.789437  | -0.496632 | -0.427526 |
|                     |           |           |           | H                   | -5.862667 | -0.441189 | 2.284745   | H                   | 1.500816  | -0.128786 | -1.328708 |
| 60                  |           |           |           |                     |           |           |            | C                   | 2.679028  | 0.365703  | 0.315978  |
| <sup>1</sup> AlaVal |           |           |           | 62                  |           |           |            | H                   | 2.327141  | 0.413675  | 1.354490  |
| N                   | -2.387712 | -2.052327 | 0.603531  | <sup>1</sup> ArgGlu |           |           |            | C                   | 4.124999  | -0.137706 | 0.311906  |
| C                   | -2.869660 | -0.890711 | -0.143665 | N                   | 1.009707  | -3.692236 | 1.271432   | C                   | 2.581869  | 1.742176  | -0.312241 |
| H                   | -3.211839 | -1.229193 | -1.129197 | C                   | 1.272807  | -2.280327 | 1.074147   | H                   | 4.510251  | -0.196782 | -0.710208 |
| C                   | -4.026254 | -0.174377 | 0.547214  | H                   | 1.294949  | -1.805841 | 2.067184   | H                   | 4.759329  | 0.535311  | 0.892909  |
| C                   | -1.713632 | 0.076151  | -0.453057 | C                   | 2.653633  | -2.114764 | 0.435356   | H                   | 4.152847  | -1.131142 | 0.763974  |
| H                   | -3.717737 | 0.175239  | 1.539440  | C                   | 0.204984  | -1.567833 | 0.238015   | O                   | 2.011519  | 1.976206  | -1.355145 |
| H                   | -4.342489 | 0.694672  | -0.031594 | H                   | 3.361120  | -2.648159 | 1.080256   | O                   | 3.223875  | 2.655259  | 0.413942  |
| H                   | -4.872713 | -0.857761 | 0.666364  | H                   | 2.641298  | -2.635254 | -0.530888  | C                   | 3.219275  | 3.978019  | -0.129274 |
| S                   | -1.958503 | 1.498647  | -1.27906  | C                   | 3.096236  | -0.670757 | 0.236718   | H                   | 3.775079  | 4.589308  | 0.580140  |
| H                   | -2.668112 | -1.997035 | 1.576265  | H                   | 2.417140  | -0.174879 | -0.472135  | H                   | 3.701881  | 3.990781  | -1.109145 |
| H                   | -2.757021 | -2.915356 | 0.227418  | H                   | 3.029404  | -0.112152 | 1.179740   | H                   | 2.195686  | 4.344495  | -0.234325 |
| N                   | -0.538094 | -0.367575 | -0.028340 | C                   | 4.524806  | -0.587376 | -0.282055  |                     |           |           |           |
| H                   | -0.553019 | -1.303463 | 0.388398  | H                   | 5.231674  | -0.994337 | 0.445468   | 64                  |           |           |           |
| C                   | 0.722436  | 0.296077  | -0.246273 | H                   | 4.635418  | -1.200470 | -1.190391  | <sup>1</sup> ArgArg |           |           |           |
| H                   | 0.686666  | 0.787575  | -1.226660 | N                   | 4.909686  | 0.789105  | -0.515675  | N                   | -1.943448 | 3.914687  | 1.050449  |
| C                   | 0.979536  | 1.391298  | 0.824060  | H                   | 4.298361  | 1.290838  | -1.143973  | C                   | -1.953549 | 2.469192  | 0.948859  |
| C                   | 1.790511  | -0.779169 | -0.252124 | C                   | 6.249748  | 1.104779  | -0.626138  | H                   | -1.891833 | 2.064296  | 1.970892  |
| H                   | 0.046887  | 1.969282  | 0.822168  | N                   | 7.148292  | 0.216331  | -0.412851  | C                   | -3.286009 | 2.022318  | 0.339220  |
| C                   | 1.186644  | 0.798033  | 2.213901  | N                   | 6.479858  | 2.452936  | -0.884789  | C                   | -0.782297 | 1.892765  | 1.455559  |
| C                   | 2.109938  | 2.335018  | 0.429736  | H                   | 8.071084  | 0.645130  | -0.394701  | H                   | -4.074716 | 2.475383  | 0.950516  |
| O                   | 1.654437  | -1.880782 | 0.231005  | H                   | 5.694418  | 3.012833  | -1.178213  | H                   | -3.361354 | 2.463386  | -0.663052 |
| H                   | 2.129984  | 0.243404  | 0.2821251 | H                   | 7.324723  | 2.648486  | -1.396811  | C                   | -3.477548 | 0.513553  | 0.254848  |
| H                   | 1.218333  | 1.592950  | 2.965207  | S                   | -0.276773 | -2.153120 | -1.245369  | H                   | -2.715915 | 0.083715  | -0.411422 |
| H                   | 0.376748  | 0.113727  | 2.484736  | H                   | 0.110632  | -3.815315 | 1.728228   | H                   | -3.329434 | 0.050903  | 1.240017  |
| H                   | 1.933907  | 2.772110  | -0.558106 | H                   | 0.915071  | -4.122554 | 0.353348   | C                   | -4.862587 | 0.145364  | -0.256307 |
| H                   | 2.179253  | 3.155316  | 1.151126  | N                   | -0.286574 | -0.458468 | 0.793691   | H                   | -5.638812 | 0.508242  | 0.422897  |
| H                   | 3.077143  | 1.824700  | 0.405657  | H                   | 0.093049  | -0.118417 | 1.671414   | H                   | -5.054890 | 0.631765  | -1.225317 |
| O                   | 2.915041  | -0.359101 | -0.839072 | H                   | -1.269764 | 0.405568  | 0.181943   | N                   | -5.006951 | -1.294275 | -0.343569 |
| C                   | 3.982803  | -1.308409 | -0.845936 | H                   | -1.057476 | 0.462040  | -0.893398  | H                   | -4.280817 | -1.751836 | -0.878421 |
| H                   | 4.812372  | -0.815338 | -1.350975 | C                   | -2.698249 | -0.139027 | 0.382062   | C                   | -6.263019 | -1.824246 | -0.571453 |
| H                   | 4.261387  | -1.582480 | 0.174375  | C                   | -1.091998 | 1.771691  | 0.816103   | N                   | -7.301110 | -1.075529 | -0.575308 |
| H                   | 3.687185  | -2.211790 | -1.384313 | H                   | -2.642347 | -1.220621 | 0.230746   | N                   | -6.206495 | -3.201442 | -0.803026 |
|                     |           |           |           | H                   | -3.019636 | 0.020851  | 1.416511   | H                   | -8.147877 | -1.636070 | -0.643631 |
| 61                  |           |           |           | C                   | -3.713390 | 0.442844  | -0.587772  | H                   | -5.547104 | -3.686247 | -0.209101 |
| <sup>1</sup> ArgAsp |           |           |           | O                   | -0.456462 | 1.969698  | 1.827826   | H                   | -7.110416 | -3.649761 | -0.798822 |
| N                   | 0.983000  | 3.942058  | -1.065561 | H                   | -3.741287 | 1.537258  | -0.542444  | S                   | -0.359549 | 2.510051  | -1.342893 |
| C                   | 1.048904  | 2.497173  | -0.984752 | H                   | -3.453297 | 0.191525  | -1.622688  | H                   | -1.077713 | 4.220107  | 1.485886  |
| H                   | 1.025266  | 2.105792  | -2.013503 | C                   | -5.104656 | -0.066304 | -0.310871  | H                   | -1.918954 | 4.290059  | 0.103805  |
| C                   | 2.384563  | 2.094133  | -0.351744 | O                   | -5.431087 | -0.737916 | 0.639385   | N                   | -0.165624 | 0.864420  | 0.729076  |
| C                   | -0.114450 | 1.862642  | -0.215185 | C                   | -1.737956 | 2.723969  | 0.142452   | H                   | -0.501735 | 0.510378  | 1.619113  |
| H                   | 3.166611  | 2.591749  | -0.936216 | O                   | -1.654996 | 4.034203  | 0.713334   | C                   | 0.923158  | 0.104897  | 0.154102  |
| H                   | 2.418558  | 2.519088  | 0.659726  | H                   | -2.223126 | 4.681266  | 0.046777   | H                   | 0.759932  | 0.026169  | -0.927147 |
| C                   | 2.639280  | 0.593621  | -0.290861 | H                   | -2.084553 | 4.041716  | 1.717469   | C                   | 2.277567  | 0.795392  | 0.407867  |
| H                   | 1.879440  | 0.116153  | 0.344535  | H                   | -0.613779 | 4.358442  | 0.770757   | O                   | 0.864673  | -1.268979 | 0.793449  |
| H                   | 2.540525  | 0.145365  | -1.288801 | O                   | -5.960863 | 0.338017  | -1.7282983 | H                   | 2.132729  | 1.843367  | 1.120315  |
| C                   | 4.024885  | 0.277662  | 0.252898  | C                   | -7.309397 | -0.087593 | -1.076495  | H                   | 2.482209  | 0.778325  | 1.486220  |
| H                   | 4.801628  | 0.697544  | -0.392016 | H                   | -7.868308 | 0.318063  | -1.919322  | C                   | 3.449740  | 0.207948  | -0.367137 |
| H                   | 4.164221  | 0.745727  | 1.239886  | H                   | -7.371915 | -1.178557 | -1.066015  | O                   | 0.305592  | -1.496424 | 1.844963  |
| N                   | 4.238757  | -1.154854 | 0.305288  | H                   | -7.708652 | 0.293589  | -0.133193  | H                   | 3.629612  | -0.831983 | -0.082364 |
| H                   | 3.523774  | -1.662737 | 0.808907  |                     |           |           |            | H                   | 3.218606  | 0.221791  | -1.441137 |
| C                   | 5.514404  | -1.626156 | 0.555322  | 63                  |           |           |            | C                   | 4.733134  | 0.994844  | -0.109329 |
| N                   | 6.510709  | -0.824848 | 0.610795  | <sup>1</sup> ArgAla |           |           |            | H                   | 4.606781  | 2.042893  | -0.406616 |
| N                   | 5.523454  | -3.010355 | 0.746255  | N                   | 0.515070  | -3.714140 | -1.109209  | H                   | 4.962653  | 0.976724  | 0.960081  |
| H                   | 7.384037  | -1.341751 | 0.687911  | C                   | 0.264799  | -2.297233 | -0.932909  | N                   | 5.897885  | 0.476602  | -0.797008 |
| H                   | 4.907460  | -3.510987 | 0.119793  | H                   | 0.381511  | -1.815941 | -1.916177  | H                   | 5.868510  | 0.546309  | -1.804486 |
| H                   | 6.449256  | -3.411366 | 0.757453  | C                   | -1.182320 | -2.101071 | -0.473839  | C                   | 6.499171  | -0.676915 | -0.334208 |
| S                   | -0.594532 | 2.433508  | 1.271585  | C                   | 1.232115  | -1.615377 | 0.040504   | N                   | 6.103403  | -1.237172 | 0.748714  |
| H                   | 0.116033  | 4.222218  | -1.514961 | H                   | -1.813887 | -2.618578 | -1.204752  | N                   | 7.515506  | -1.108687 | -1.186525 |
| H                   | 0.929131  | 4.304935  | -0.115479 |                     |           |           |            |                     |           |           |           |
| N                   | -0.681974 | 0.821323  | -0.831064 |                     |           |           |            |                     |           |           |           |

|         |           |           |           |         |           |           |           |         |           |           |           |
|---------|-----------|-----------|-----------|---------|-----------|-----------|-----------|---------|-----------|-----------|-----------|
| H       | 6.731740  | -1.992862 | 1.012075  | H       | 0.242748  | -4.224426 | 0.252225  | H       | 0.957200  | 0.062043  | 0.476053  |
| H       | 8.076061  | -0.361032 | -1.572390 | N       | -1.203487 | -0.625245 | 0.626628  | H       | 1.314329  | -0.069239 | -1.245375 |
| H       | 8.085700  | -1.846477 | -0.801767 | H       | -0.889390 | -0.267294 | 1.523799  | C       | 3.033200  | 0.334758  | -0.030291 |
| O       | 1.515625  | -2.182424 | 0.078330  | C       | -2.166259 | 0.215778  | -0.054308 | H       | 3.646929  | 0.710575  | -0.853253 |
| C       | 1.580511  | -3.484834 | 0.666165  | H       | -1.896749 | 0.306935  | -1.104414 | H       | 3.309679  | 0.932044  | 0.852544  |
| H       | 2.135010  | -4.098319 | -0.042137 | C       | -3.570986 | -0.404243 | 0.047520  | N       | 3.365648  | -1.065079 | 0.145434  |
| H       | 2.099724  | -3.443474 | 1.626086  | C       | -2.099827 | 1.571329  | 0.637559  | H       | 2.818405  | -1.535563 | 0.853908  |
| H       | 0.575532  | -3.883795 | 0.820417  | H       | -3.482322 | -1.415412 | -0.354756 | C       | 4.697698  | -1.436297 | 0.156590  |
| 65      |           |           |           | H       | -3.878651 | -0.458044 | 1.095946  | N       | 5.618375  | -0.589492 | -0.113842 |
| 'ArgAsn |           |           |           | S       | -4.810779 | 0.506225  | -0.941523 | N       | 4.854723  | -2.779205 | 0.509292  |
| N       | 0.490548  | 3.801034  | -1.305854 | O       | -1.560514 | 1.758471  | 1.706236  | H       | 6.524048  | -1.049954 | -0.173401 |
| C       | 0.642395  | 2.371807  | -1.120251 | H       | -5.531211 | -0.580382 | -1.266939 | H       | 4.156051  | -3.389930 | 0.107591  |
| H       | 0.600663  | 1.901555  | -2.114719 | O       | -2.726452 | 2.505480  | -0.066606 | H       | 5.788239  | -3.130722 | 0.357774  |
| C       | 2.022818  | 2.093367  | -0.517499 | C       | -2.791815 | 3.798473  | 0.543633  | S       | -1.509846 | 2.343548  | 1.571807  |
| C       | -0.450665 | 1.736078  | -0.253564 | H       | -3.340651 | 4.424322  | -0.157715 | H       | -1.422349 | 3.797750  | -1.479649 |
| H       | 2.754275  | 2.567750  | -1.181479 | H       | -3.315439 | 3.741162  | 1.500250  | H       | -0.389486 | 4.101995  | -0.250270 |
| H       | 2.077496  | 2.614136  | 0.447206  | H       | -1.786011 | 4.190465  | 0.708987  | N       | -1.827712 | 0.478360  | -0.269637 |
| C       | 2.352868  | 0.618821  | -0.324748 | 67      |           |           |           | H       | -1.638937 | 0.067504  | -1.178084 |
| H       | 1.649210  | 0.178092  | 0.396209  | 'ArgPhe |           |           |           | C       | -2.744607 | -0.259842 | 0.550986  |
| H       | 2.225827  | 0.066207  | -1.265294 | N       | 1.522662  | 3.936843  | -1.076960 | C       | -3.199602 | -1.476921 | -0.216316 |
| C       | 3.777939  | 0.420877  | 0.171702  | C       | 1.546049  | 2.490534  | -0.993488 | H       | -2.279167 | -0.562977 | 1.497690  |
| H       | 4.504479  | 0.770014  | -0.566614 | H       | 1.533251  | 2.098303  | -2.022218 | H       | -3.609010 | 0.355802  | 0.830659  |
| H       | 3.951493  | 1.022494  | 1.077879  | C       | 2.855883  | 2.051049  | -0.331966 | O       | -2.823900 | -1.755365 | -1.333243 |
| N       | 4.050784  | -0.822729 | 0.400940  | C       | 0.348256  | 1.890639  | -0.249345 | O       | -4.062053 | -2.197921 | 0.494808  |
| H       | 3.389013  | -1.440173 | 1.011822  | H       | 3.664780  | 2.520686  | -0.902977 | C       | -4.552795 | -3.374632 | -0.153553 |
| C       | 5.359938  | -1.399875 | 0.536617  | H       | 2.882204  | 2.480750  | 0.677692  | H       | -3.729073 | -4.050998 | -0.392539 |
| N       | 6.327061  | -0.580196 | 0.348309  | C       | 3.061749  | 0.543751  | -0.256620 | H       | -5.236038 | -3.837858 | 0.556540  |
| N       | 5.481984  | -2.763235 | 0.789948  | H       | 2.275935  | 0.096570  | 0.368985  | H       | -5.075796 | -3.112443 | -1.075927 |
| H       | 7.215115  | -1.077417 | 0.347813  | H       | 2.965403  | 0.091392  | -1.252932 | 69      |           |           |           |
| H       | 4.650108  | -3.261614 | 1.066202  | C       | 4.426752  | 0.187120  | 0.313400  | 'ArgGln |           |           |           |
| H       | 6.298141  | -3.024090 | 1.319239  | H       | 5.228288  | 0.565703  | -0.326596 | N       | 0.672503  | -3.706742 | 1.286387  |
| S       | -0.885326 | 2.386511  | 1.215008  | H       | 4.568783  | 0.667254  | 1.294214  | C       | 0.916023  | -2.292196 | 1.084997  |
| H       | -0.408660 | 3.997318  | -1.736122 | N       | 4.586358  | -1.251243 | 0.394625  | H       | 0.900682  | -1.809346 | 2.074113  |
| H       | 0.451480  | 4.229599  | -0.382555 | H       | 3.850430  | -1.721168 | 0.904951  | C       | 2.312589  | -2.107422 | 0.485161  |
| N       | -0.991194 | 0.632336  | -0.774961 | C       | 5.841828  | -1.765805 | 0.661060  | C       | -0.136533 | -1.602733 | 0.210832  |
| H       | -0.603259 | 0.244687  | -1.630108 | N       | 6.868715  | -1.003147 | 0.703161  | H       | 3.006152  | -2.643237 | 1.143050  |
| C       | -1.949578 | -0.231693 | -0.124737 | N       | 5.796282  | -3.144600 | 0.883260  | H       | 2.331226  | -2.616234 | -0.487174 |
| H       | -1.651590 | -0.416016 | 0.918333  | H       | 7.720579  | -1.552225 | 0.796301  | C       | 2.749823  | -0.657728 | 0.319406  |
| C       | -3.358831 | 0.366262  | -0.064272 | H       | 5.162746  | -3.635259 | 0.266515  | H       | 2.078398  | -0.148913 | -0.387293 |
| C       | -1.914346 | -1.545364 | -0.887396 | H       | 6.705525  | -3.581314 | 0.907480  | C       | 2.667823  | -0.120102 | 1.273667  |
| H       | -3.243431 | 1.434381  | 0.156984  | S       | -0.135105 | 2.471557  | 1.235191  | C       | 4.183970  | -0.554904 | -0.179068 |
| H       | -3.880722 | 0.271236  | -1.022750 | H       | 0.672011  | 4.240478  | -1.542128 | H       | 4.877776  | -1.007279 | 0.534630  |
| C       | -4.168471 | -0.235800 | 1.074991  | H       | 1.461194  | 4.301803  | -0.128126 | H       | 4.303694  | -1.117944 | -1.117707 |
| O       | -1.159922 | -1.767547 | -1.810852 | N       | -0.242181 | 0.873419  | -0.879795 | N       | 4.574269  | 0.832241  | -0.334220 |
| O       | -3.652237 | -0.788126 | 0.2028903 | H       | 0.120495  | 0.547822  | -1.770302 | H       | 3.956880  | 1.374055  | -0.924030 |
| N       | -5.514918 | -0.087815 | 0.952927  | C       | -1.353805 | 0.107231  | -0.367445 | C       | 5.910053  | 1.129376  | -0.530634 |
| H       | -6.079686 | -0.335547 | 1.749295  | H       | -1.237349 | -0.006905 | 0.715426  | N       | 6.804742  | 0.217814  | -0.449133 |
| H       | -5.921016 | 0.494218  | 0.240745  | C       | -2.698049 | 0.823319  | -0.653610 | N       | 6.097972  | 2.480783  | -0.833353 |
| O       | -2.814789 | -2.408586 | -0.434555 | N       | -1.298215 | -1.244617 | -1.050479 | H       | 7.736743  | 0.622845  | -0.505049 |
| C       | -2.838950 | -3.673713 | -1.099518 | H       | -2.554174 | 1.856368  | -0.319741 | H       | 5.509584  | 3.103150  | -0.295705 |
| H       | -3.613433 | -4.252006 | -0.598349 | H       | -2.857094 | 0.842839  | -1.737554 | H       | 7.064451  | 2.769580  | -0.809347 |
| H       | -3.075449 | -3.545887 | -2.158431 | C       | -3.882078 | 0.220092  | 0.051313  | S       | -0.594686 | -2.231583 | -1.262833 |
| H       | -1.869797 | -4.169412 | -1.010517 | O       | -0.744806 | -1.433635 | -2.113238 | H       | -0.238156 | -3.841153 | 1.716323  |
| 66      |           |           |           | C       | -4.847541 | -0.507665 | -0.646218 | H       | 0.611301  | -4.145001 | 0.369105  |
| 'ArgCys |           |           |           | C       | -4.032157 | 0.386541  | 1.431574  | N       | -0.631688 | -0.474467 | 0.721753  |
| N       | 0.247385  | -3.797900 | 1.176907  | H       | -4.746923 | -0.635556 | -1.721914 | H       | -0.269196 | -0.108782 | 1.596528  |
| C       | 0.420453  | -2.369448 | 1.006988  | C       | -5.939735 | -1.060236 | 0.017092  | H       | -1.595168 | 0.375986  | 0.061414  |
| H       | 0.347749  | -1.905865 | 2.002851  | C       | -5.119888 | -0.167767 | 2.097205  | H       | -1.352137 | 0.402882  | -1.008532 |
| C       | 1.823737  | -2.100401 | 0.456255  | H       | -3.291194 | 0.963500  | 1.981145  | C       | -3.034229 | -0.151568 | 0.238236  |
| C       | -0.637288 | -1.719421 | 0.108885  | H       | -6.685964 | -1.617913 | -0.541879 | C       | -1.430514 | 1.757648  | 0.663517  |
| H       | 2.524902  | -2.590867 | 1.140844  | C       | -6.077264 | -0.893465 | 1.391715  | H       | -2.972984 | -1.242712 | 0.188036  |
| H       | 1.907216  | -2.611686 | -0.511487 | H       | -5.224808 | -0.026896 | 3.169212  | H       | -3.422525 | 0.107927  | 1.228180  |
| C       | 2.179193  | -0.628193 | 0.292978  | H       | -6.929634 | -1.321681 | 1.911167  | C       | -4.000593 | 0.341592  | -0.828238 |
| H       | 1.510187  | -0.169603 | -0.449652 | O       | -1.949739 | -2.175166 | -0.363938 | O       | -0.807280 | 1.984039  | 1.677141  |
| H       | 2.023609  | -0.084739 | 1.234524  | C       | -2.022897 | -3.459111 | -0.988057 | H       | -3.944073 | 1.433039  | -0.919678 |
| C       | 3.625999  | -0.446148 | -0.143595 | H       | -2.595190 | -4.084312 | -0.304740 | H       | -3.728439 | -0.075599 | -1.805112 |
| H       | 4.316402  | -0.814811 | 0.619300  | H       | -2.526277 | -3.385909 | -1.954711 | C       | -5.436286 | 0.000982  | -0.461594 |
| H       | 3.826644  | -1.040648 | -1.048975 | H       | -1.021151 | -3.867373 | -1.139728 | O       | -5.828903 | -0.018394 | 0.692876  |
| N       | 3.933028  | 0.954720  | -0.344309 | 68      |           |           |           | N       | -6.261928 | -0.231035 | -1.515600 |
| H       | 3.331277  | 1.421403  | -1.007963 | 'ArgGly |           |           |           | H       | -7.218634 | -0.475983 | -1.318945 |
| C       | 5.254546  | 1.356822  | -0.369795 | N       | -0.470358 | 3.627605  | -1.168098 | H       | -5.918895 | -0.321152 | -2.455640 |
| N       | 6.193308  | 0.525641  | -0.105349 | C       | -0.279541 | 2.209967  | -0.935287 | O       | -2.075232 | 2.688348  | -0.039987 |
| N       | 5.412088  | 2.718791  | -0.607211 | H       | -0.451161 | 1.690537  | -1.890880 | C       | -2.024194 | 4.009284  | 0.509189  |
| H       | 7.083998  | 1.011874  | -0.028310 | H       | 1.172716  | 1.966171  | -0.514220 | H       | -2.587788 | 4.635800  | -0.180418 |
| H       | 4.611863  | 3.230042  | -0.945879 | C       | -1.240925 | 1.618516  | 0.099798  | H       | -2.476771 | 4.026666  | 1.502952  |
| H       | 6.273356  | 2.974282  | -1.062247 | H       | 1.800824  | 2.434023  | -1.280743 | H       | -0.989549 | 4.350809  | 0.582977  |
| S       | -1.015425 | -2.339789 | -1.387812 | H       | 1.346176  | 2.511813  | 0.422387  | 70      |           |           |           |
| H       | -0.667298 | -3.990632 | 1.574540  | C       | 1.552117  | 0.501579  | -0.337456 | 'ArgIle |           |           |           |

|         |           |           |           |         |           |           |           |         |           |           |           |
|---------|-----------|-----------|-----------|---------|-----------|-----------|-----------|---------|-----------|-----------|-----------|
| N       | 0.273026  | -3.720246 | 1.153574  | C       | -0.963514 | -1.560686 | -0.401037 | H       | 2.864654  | -0.131055 | 1.230661  |
| C       | 0.526703  | -2.303884 | 0.974828  | H       | -2.825722 | 1.255104  | -1.060858 | C       | 4.363912  | -0.528697 | -0.250232 |
| H       | 0.458048  | -1.828146 | 1.965246  | H       | -2.719479 | -0.241985 | -1.989455 | H       | 5.076659  | -0.969706 | 0.451705  |
| C       | 1.953137  | -2.116497 | 0.452817  | C       | -3.972796 | -0.291031 | -0.245871 | H       | 4.478761  | -1.088004 | -1.191708 |
| C       | -0.479631 | -1.610064 | 0.050579  | O       | -1.703284 | -2.496130 | -0.620065 | N       | 4.728170  | 0.865220  | -0.409168 |
| H       | 2.612944  | -2.640628 | 1.153472  | N       | -4.312974 | -1.608968 | -0.059302 | H       | 4.100693  | 1.392812  | -1.001289 |
| H       | 2.028252  | -2.635379 | -0.511481 | C       | -4.999743 | 0.415325  | 0.334107  | C       | 6.058013  | 1.187122  | -0.607486 |
| C       | 2.390500  | -0.666278 | 0.292196  | H       | -3.712735 | -2.379139 | -0.320415 | N       | 6.970839  | 0.294173  | -0.520801 |
| H       | 1.761635  | -0.176436 | -0.465519 | C       | -5.490335 | -1.633747 | 0.613473  | N       | 6.219630  | 2.540166  | -0.917888 |
| H       | 2.244590  | -0.111688 | 1.228783  | N       | -5.940429 | -0.425632 | 0.864549  | H       | 7.894481  | 0.717535  | -0.579511 |
| C       | 3.853374  | -0.563870 | -0.115303 | H       | -5.102728 | 1.491022  | 0.391026  | H       | 5.618114  | 3.154113  | -0.385163 |
| H       | 4.507121  | -0.967510 | 0.662135  | H       | -5.975726 | 2.558480  | 0.895686  | H       | 7.180153  | 2.848190  | -0.894523 |
| H       | 4.040278  | -1.170515 | -1.015450 | O       | 0.351021  | -1.699345 | -0.223097 | S       | -0.401182 | -2.232623 | -1.271018 |
| N       | 4.238724  | 0.818232  | -0.312424 | C       | 0.844986  | -3.044213 | -0.275251 | H       | 0.020673  | -3.903981 | 1.669023  |
| H       | 3.662776  | 1.319753  | -0.973529 | H       | 0.333813  | -3.660805 | 0.467307  | H       | 0.850307  | -4.169319 | 0.302214  |
| C       | 5.580306  | 1.145150  | -0.338775 | H       | 0.672892  | -3.471160 | -1.265950 | N       | -0.443656 | -0.534053 | 0.766273  |
| N       | 6.471253  | 0.261378  | -0.079073 | H       | 1.911828  | -2.980634 | -0.060217 | H       | -0.081868 | -0.199307 | 1.653407  |
| N       | 5.814919  | 2.497327  | -0.571414 |         |           |           |           | C       | -1.446709 | 0.316475  | 0.163775  |
| H       | 7.387855  | 0.696830  | -0.001568 | 72      |           |           |           | H       | -1.263059 | 0.360878  | -0.916314 |
| H       | 5.043912  | 3.053824  | -0.906635 | 'ArgLeu |           |           |           | C       | -2.864000 | -0.241336 | 0.405431  |
| H       | 6.687151  | 2.703554  | -1.030637 | N       | -0.420548 | -3.773660 | -1.171743 | C       | -1.263944 | 1.688980  | 0.780598  |
| S       | -0.831866 | -2.212713 | -1.461717 | C       | -0.643864 | -2.349081 | -1.019737 | H       | -2.809078 | -1.305393 | 0.150246  |
| H       | -0.661160 | -3.857683 | 1.528549  | H       | -0.605195 | -1.898764 | -2.023617 | H       | -3.089862 | -0.175952 | 1.477908  |
| H       | 0.265761  | -4.152814 | 0.231551  | C       | -2.045946 | -2.123903 | -0.449202 | C       | -3.964693 | 0.414642  | -0.419797 |
| N       | -1.024049 | -0.502669 | 0.559378  | C       | 0.408213  | -1.651476 | -0.150783 | O       | -0.694161 | 1.883539  | 1.832662  |
| H       | -0.701864 | -0.149591 | 1.454942  | H       | -2.741337 | -2.649450 | -1.113452 | H       | -4.026789 | 1.485357  | -0.191969 |
| C       | -1.952916 | 0.364834  | -0.131089 | H       | -2.093490 | -2.621769 | 0.527830  | H       | -3.701741 | 0.342337  | -1.483790 |
| H       | -1.663563 | 0.408653  | -1.188385 | C       | -2.449623 | -0.662570 | -0.302016 | C       | -5.321721 | -0.240995 | -0.187377 |
| C       | -3.407547 | -0.173538 | -0.050659 | H       | -1.782761 | -0.170722 | 0.421026  | H       | -5.279650 | -1.307930 | -0.436461 |
| C       | -1.796446 | 1.734144  | 0.501226  | H       | -2.329330 | -0.129482 | -1.254568 | H       | -5.576951 | -0.183383 | 0.881303  |
| H       | -3.301666 | -1.234108 | -0.314414 | C       | -3.893542 | -0.523058 | 0.158700  | C       | -6.438520 | 0.398815  | -1.000268 |
| C       | -3.967277 | -0.072805 | 1.365476  | H       | -4.584781 | -0.925343 | -0.586271 | H       | -6.465133 | 1.483042  | -0.781372 |
| C       | -4.311779 | 0.466654  | -1.107500 | H       | -4.057891 | -1.110755 | 1.075657  | H       | -6.198004 | 0.307759  | -2.067114 |
| O       | -1.251851 | 1.926285  | 1.567078  | N       | -4.243269 | 0.869816  | 0.346713  | N       | -7.699654 | -0.290093 | -0.766388 |
| H       | -4.178091 | 0.966991  | 1.643568  | H       | -3.637372 | 1.367777  | 0.983267  | H       | -8.001166 | -0.136136 | 0.191115  |
| H       | -4.900946 | -0.633320 | 1.456947  | C       | -5.575948 | 1.227258  | 0.406609  | H       | -8.425681 | 0.099132  | -1.358429 |
| H       | -3.268186 | -0.481889 | 2.101518  | N       | -6.493604 | 0.361099  | 0.183152  | O       | -1.819719 | 2.650333  | 0.044632  |
| H       | -4.446288 | 1.531977  | -0.886317 | N       | -5.773478 | 2.587226  | 0.628520  | C       | -1.272720 | 3.967084  | 0.595848  |
| H       | -3.798854 | 0.415754  | -2.076335 | H       | -7.402061 | 0.816361  | 0.126616  | H       | -2.225295 | 4.620440  | -0.118956 |
| C       | -5.671365 | -0.211791 | -1.231454 | H       | -4.981628 | 3.129076  | 0.938266  | H       | -2.221858 | 4.011195  | 1.568779  |
| H       | -6.268305 | -0.105767 | -0.320372 | H       | -6.628503 | 2.818610  | 1.107734  | H       | -0.681114 | 4.256246  | 0.717782  |
| H       | -6.249021 | 0.225409  | -2.051298 | S       | 0.797577  | -2.217957 | 1.366801  |         |           |           |           |
| H       | -5.561640 | -1.282130 | -1.437343 | H       | 0.495223  | -3.936930 | -1.580303 | 74      |           |           |           |
| O       | -2.341544 | 2.697948  | -0.239620 | H       | -0.383325 | -4.182527 | -0.239653 | 'ArgMet |           |           |           |
| C       | -2.267043 | 4.011117  | 0.323022  | N       | 0.959039  | -0.572993 | -0.709908 | N       | 0.839410  | -3.757227 | 1.214008  |
| H       | -2.753916 | 4.667166  | -0.396997 | O       | 0.645760  | -0.261698 | -1.623739 | C       | 1.056678  | -2.334214 | 1.045235  |
| H       | -2.781806 | 4.045338  | 1.285795  | C       | 1.950077  | 0.281390  | -0.091076 | H       | 1.058833  | -1.878283 | 2.047237  |
| H       | -1.225211 | 4.304726  | 0.469113  | H       | 1.725803  | 0.349367  | 0.978619  | C       | 2.435055  | -2.112202 | 0.416835  |
|         |           |           |           | C       | 3.364790  | -0.301325 | -0.285694 | C       | -0.027771 | -1.638541 | 0.215880  |
| 71      |           |           |           | C       | 1.805919  | 1.640658  | -0.744919 | H       | 3.152755  | -2.652398 | 1.044560  |
| 'ArgHis |           |           |           | H       | 3.310488  | -1.332348 | 0.084827  | H       | 2.437584  | -2.597494 | -0.567641 |
| N       | 0.985971  | 4.100299  | -0.984095 | H       | 3.562228  | -0.354196 | -1.364215 | C       | 2.845608  | -0.652200 | 0.275373  |
| C       | 1.130667  | 2.671816  | -0.810619 | O       | 4.517521  | 0.419171  | 0.420956  | H       | 2.151351  | -0.138746 | -0.405359 |
| H       | 1.304896  | 2.233428  | -1.805682 | C       | 1.300375  | 1.814346  | -1.832490 | H       | 2.775736  | -0.137317 | 1.243119  |
| C       | 2.372119  | 2.390930  | 0.047574  | H       | 4.595895  | 1.438201  | 0.019001  | C       | 4.267180  | -0.515073 | -0.250256 |
| C       | -0.092268 | 1.974187  | -0.201777 | C       | 4.298474  | 0.520022  | 1.929193  | H       | 4.983080  | -0.970367 | 0.439267  |
| H       | 3.205824  | 2.906260  | -0.442897 | C       | 5.823601  | -0.310602 | 0.110714  | H       | 4.376146  | -1.056609 | -1.202763 |
| H       | 2.224364  | 2.871680  | 1.023832  | H       | 4.104962  | -0.467762 | 2.362891  | N       | 4.632249  | 0.881163  | -0.384185 |
| C       | 2.686237  | 0.912615  | 0.230355  | H       | 5.184114  | 0.936026  | 2.420437  | H       | 4.000887  | 1.421980  | -0.960003 |
| H       | 1.886017  | 0.424303  | 0.800630  | H       | 3.453695  | 1.169118  | 2.177132  | C       | 5.961121  | 1.204620  | -0.587401 |
| H       | 2.741904  | 0.410392  | -0.743665 | H       | 6.001389  | -0.379312 | -0.967910 | N       | 6.872216  | 0.307746  | -0.528761 |
| C       | 4.015587  | 0.668504  | 0.938294  | H       | 6.677548  | 0.206601  | 0.559489  | H       | 6.122843  | 2.563805  | -0.869244 |
| H       | 4.839297  | 1.051144  | 0.329617  | H       | 5.804181  | -1.330660 | 0.511791  | N       | 7.796532  | 0.729790  | -0.586115 |
| H       | 4.041413  | 1.188263  | 1.903110  | O       | 2.319482  | 2.615767  | 0.004230  | H       | 5.528569  | 3.167055  | -0.316529 |
| N       | 4.281819  | -0.736671 | 1.187218  | C       | 2.268358  | 3.921107  | -0.579267 | H       | 7.084322  | 2.869100  | -0.849351 |
| C       | 3.655201  | -1.168287 | 1.852324  | H       | 2.725360  | 4.587455  | 0.150744  | S       | -0.513243 | -2.232637 | -1.261458 |
| C       | 4.621195  | -1.554808 | 0.130190  | H       | 2.822460  | 3.941861  | -1.520339 | H       | -0.059537 | -3.918008 | 1.659248  |
| N       | 4.887617  | -1.069236 | -1.024191 | H       | 1.233310  | 4.211693  | -0.771994 | H       | 0.765220  | -4.172480 | 0.287022  |
| N       | 4.594402  | -2.910018 | 0.487354  |         |           |           |           | N       | -0.528402 | -0.532634 | 0.772433  |
| H       | 5.229117  | -1.792047 | -1.653226 | 73      |           |           |           | H       | -0.148723 | -0.187116 | 1.647942  |
| H       | 4.941630  | -3.089333 | 1.421249  | 'ArgLys |           |           |           | C       | -1.523716 | 0.319924  | 0.164876  |
| H       | 5.051667  | -3.506287 | -0.187426 | N       | 0.922787  | -3.750072 | 1.227652  | H       | -1.331354 | 0.363144  | -0.914449 |
| S       | -0.961114 | 2.647758  | 1.041243  | C       | 1.145555  | -2.328430 | 1.050429  | C       | -2.947172 | -0.232923 | 0.395048  |
| H       | 0.192930  | 4.292854  | -1.589176 | H       | 1.145381  | -1.866021 | 2.049544  | C       | -1.344013 | 1.693944  | 0.781686  |
| H       | 0.739143  | 4.500963  | -0.080918 | C       | 2.526983  | -2.115747 | 0.426360  | H       | -2.884538 | -1.314221 | 0.238253  |
| N       | -0.365834 | 0.775536  | -0.737386 | C       | 0.065742  | -1.635844 | 0.211992  | H       | -3.236225 | -0.065224 | 1.439682  |
| H       | 0.266129  | 0.426837  | -1.445033 | H       | 3.241537  | -2.650006 | 1.062771  | C       | -3.986466 | 0.345371  | -0.554375 |
| C       | -1.410163 | -0.113210 | -0.270265 | H       | 2.532681  | -2.611373 | -0.552903 | O       | -0.719327 | 1.899250  | 1.799144  |
| H       | -1.540269 | 0.097785  | 0.802718  | C       | 2.939542  | -0.657871 | 0.269766  | H       | -4.024038 | 1.436498  | -0.484299 |
| C       | -2.755218 | 0.167754  | -0.971876 | H       | 2.248961  | -0.153050 | -0.421017 | H       | -3.729384 | 0.074607  | -1.585188 |

|         |           |           |           |         |           |           |           |         |           |           |           |
|---------|-----------|-----------|-----------|---------|-----------|-----------|-----------|---------|-----------|-----------|-----------|
| S       | -5.620227 | -0.338181 | -0.145314 | S       | -1.309662 | -2.264834 | -1.533584 | H       | 1.561219  | -3.268839 | 0.502045  |
| C       | -6.598969 | 0.450923  | -1.443410 | H       | -1.171217 | -3.950370 | 1.426399  | H       | 1.047618  | -2.598342 | -1.039229 |
| H       | -6.264132 | 0.141177  | -2.437234 | H       | -0.206033 | -4.206940 | 0.149071  | C       | 1.649695  | -1.115377 | 0.431526  |
| H       | -7.633155 | 0.127498  | -1.307462 | N       | -1.540306 | -0.563564 | 0.491035  | H       | 1.086945  | -0.284297 | -0.009884 |
| H       | -6.561108 | 1.541157  | -1.365253 | H       | -1.288607 | -0.251858 | 1.423812  | H       | 1.606761  | -0.975803 | 1.521340  |
| O       | -1.972009 | 2.641508  | 0.086867  | C       | -2.454915 | 0.314458  | -0.201679 | C       | 3.099874  | -1.006287 | -0.013561 |
| C       | -1.889898 | 3.958024  | 0.642856  | H       | -2.193364 | 0.360650  | -1.262884 | H       | 3.736629  | -1.737609 | 0.492702  |
| H       | -2.444521 | 4.599969  | -0.039775 | H       | -3.890262 | -0.213762 | -0.069745 | H       | 3.186905  | -1.219234 | -1.090488 |
| H       | -2.334307 | 3.980091  | 1.640280  | C       | -2.329497 | 1.678345  | 0.450754  | N       | 3.602193  | 0.312677  | 0.310346  |
| H       | -0.847808 | 4.277338  | 0.711244  | H       | -3.905009 | -1.206200 | -0.538913 | H       | 2.961869  | 1.064106  | 0.094586  |
| 75      |           |           |           | H       | -4.115727 | -0.328085 | 1.002692  | C       | 4.940927  | 0.585463  | 0.142856  |
| 'ArgPro |           |           |           | O       | -4.753815 | 0.698918  | -0.698991 | N       | 5.757810  | -0.348879 | -0.180896 |
| N       | 0.061509  | -0.709079 | -2.199092 | O       | -2.031741 | 1.821579  | 1.617952  | N       | 5.284127  | 1.901554  | 0.450347  |
| H       | 0.173992  | -0.683138 | -0.751168 | H       | -5.607654 | 0.272649  | -0.812612 | H       | 6.716220  | -0.009273 | -0.133712 |
| C       | 0.159568  | 0.370258  | -0.449231 | O       | -2.591595 | 2.668909  | -0.390022 | H       | 4.529730  | 2.569800  | 0.506823  |
| C       | -1.051742 | -1.336659 | -0.101591 | H       | -2.578888 | 3.975601  | 0.189349  | H       | 6.080068  | 2.252270  | -0.058211 |
| C       | 1.452491  | -1.357576 | -0.241617 | H       | -2.810307 | 4.660047  | -0.625270 | S       | -2.089364 | -1.961249 | -1.717580 |
| H       | -1.107668 | -2.374791 | -0.452829 | H       | -3.331223 | 4.048788  | 0.977803  | H       | -0.452177 | -4.577767 | 0.899350  |
| H       | -0.896106 | -1.388003 | 0.984316  | H       | -1.596916 | 4.196916  | 0.613840  | H       | -1.878525 | -4.057868 | 0.263471  |
| C       | -2.340321 | -0.583843 | -0.406505 | 77      |           |           |           | N       | -1.466333 | -0.423565 | 0.354240  |
| H       | -2.295962 | 0.427740  | 0.014232  | 'ArgTyr |           |           |           | H       | -0.989453 | -0.291795 | 1.236246  |
| H       | -2.443218 | -0.484430 | -1.493505 | N       | -2.005822 | 3.969444  | 0.921458  | C       | -2.175356 | 0.720205  | -0.148183 |
| C       | -3.562765 | -1.281901 | 0.181670  | C       | -1.974597 | 2.521008  | 0.893118  | H       | -2.608520 | 0.425428  | -1.112998 |
| H       | -3.649964 | -2.299634 | -0.218308 | H       | -1.986266 | 2.168277  | 1.936022  | C       | -3.297170 | 1.135324  | 0.811185  |
| H       | -3.459273 | -1.360030 | 1.267682  | C       | -3.242508 | 2.009255  | 0.202604  | C       | -1.210940 | 1.837395  | -0.389732 |
| N       | -4.817124 | -0.598364 | -0.070633 | C       | -0.729001 | 1.938676  | 0.216692  | H       | -3.770592 | 2.031331  | 0.385236  |
| C       | -5.070323 | -0.527309 | -1.046459 | H       | -4.088544 | 2.464837  | 0.729518  | C       | -4.334279 | 0.042466  | 0.995301  |
| H       | -5.134059 | 0.527036  | 0.662981  | H       | -3.249671 | 2.404370  | -0.812366 | O       | -2.635437 | 1.452144  | 2.026774  |
| N       | -4.402296 | 0.907637  | 1.644229  | C       | -3.386919 | 0.493179  | 0.171082  | O       | -0.018869 | 1.850842  | -0.194028 |
| N       | -6.289446 | 1.147735  | 0.182516  | H       | -2.568613 | 0.059463  | -0.421360 | H       | -3.870903 | -0.862153 | 1.397832  |
| H       | -4.847926 | 1.672546  | 2.146006  | H       | -3.297131 | 0.076279  | 1.183322  | H       | -5.114058 | 0.371798  | 1.691128  |
| H       | -7.011034 | 0.500727  | -0.105746 | H       | -4.722284 | 0.064025  | -0.418825 | H       | -4.814190 | -0.208730 | 0.045400  |
| H       | -6.651718 | 1.862373  | 0.795545  | H       | -5.553587 | 0.424907  | 0.192728  | H       | -3.301775 | 1.662629  | 2.688205  |
| S       | 1.758374  | -2.949173 | -0.635121 | H       | -4.861688 | 0.511381  | -1.415388 | O       | -1.866073 | 2.934109  | -0.874183 |
| H       | 0.844260  | -0.191409 | -2.591819 | N       | -4.819978 | -1.381426 | -0.463969 | C       | -1.054425 | 4.077308  | -1.143410 |
| H       | 0.188415  | -1.676224 | -2.493889 | H       | -4.058870 | -1.832857 | -0.953589 | H       | -1.731273 | 4.835215  | -1.535778 |
| N       | 2.286468  | -0.637936 | 0.526278  | C       | -6.049166 | -1.956789 | -0.728168 | H       | -0.573536 | 4.429019  | -0.227579 |
| C       | 3.477126  | -1.220745 | 1.146145  | N       | -7.108075 | -1.241394 | -0.798415 | H       | -0.283884 | 3.834333  | -1.878756 |
| C       | 2.183787  | 0.794620  | 0.796629  | N       | -5.941740 | -3.337446 | -0.915182 | 79      |           |           |           |
| H       | 4.269241  | -1.331088 | 0.394052  | H       | -7.934153 | -1.829546 | -0.884952 | 'ArgTrp |           |           |           |
| H       | 3.238188  | -2.219867 | 1.516255  | H       | -5.293614 | -3.784800 | -0.280916 | N       | 2.135115  | 3.940515  | -1.077022 |
| C       | 3.836925  | -0.213836 | 2.228310  | H       | -6.831092 | -3.813503 | -0.936063 | C       | 2.150560  | 2.492152  | -1.022245 |
| C       | 3.468519  | 1.119020  | 1.586677  | S       | -0.212670 | 2.480131  | -1.271754 | H       | 2.248351  | 2.121931  | -2.054480 |
| H       | 1.297700  | 1.024794  | 1.399291  | H       | -1.185769 | 4.321199  | 1.407256  | C       | 3.381455  | 2.037102  | -0.233568 |
| C       | 2.142132  | 1.630086  | -0.473262 | H       | -1.918633 | 4.300294  | -0.037841 | C       | 0.878321  | 1.882397  | -0.423840 |
| H       | 4.889008  | -0.267807 | 2.518105  | N       | -0.126234 | 0.969606  | 0.908107  | H       | 4.249639  | 2.502777  | -0.713472 |
| H       | 3.228841  | -0.390041 | 3.122337  | H       | -0.508604 | 0.667880  | 1.798681  | H       | 3.305758  | 2.459393  | 0.776791  |
| H       | 4.257342  | 1.424052  | 0.889863  | C       | 1.034112  | 0.229069  | 0.470635  | C       | 3.563524  | 0.527440  | -0.146741 |
| H       | 3.307402  | 1.933955  | 2.294957  | H       | 0.968109  | 0.071759  | -0.610868 | H       | 2.711870  | 0.088344  | 0.392799  |
| O       | 2.531573  | 1.279032  | -1.560780 | C       | 2.337669  | 1.006907  | 0.785388  | H       | 3.566239  | 0.078876  | -1.149152 |
| O       | 1.651786  | 2.843375  | -0.199803 | C       | 1.000124  | -1.097043 | 1.202548  | C       | 4.859382  | 0.155898  | 0.559835  |
| C       | 1.605860  | 3.742781  | -1.310475 | H       | 2.171322  | 2.019322  | 0.401996  | H       | 5.729328  | 0.502140  | -0.004063 |
| H       | 0.966269  | 3.339396  | -2.098786 | H       | 2.442010  | 1.078481  | 1.873962  | H       | 4.913228  | 0.654551  | 1.540485  |
| H       | 1.192950  | 4.672108  | -0.920703 | C       | 3.575082  | 0.418811  | 0.166912  | N       | 4.983831  | -1.281776 | 0.683592  |
| H       | 2.607714  | 3.905158  | -1.714605 | O       | 0.428418  | -1.261047 | 2.259962  | H       | 4.202974  | -1.727920 | 1.143574  |
| 76      |           |           |           | C       | 4.530145  | -0.246361 | 0.933716  | C       | 6.220112  | -1.828973 | 0.965219  |
| 'ArgSer |           |           |           | C       | 3.797025  | 0.529048  | -1.211022 | N       | 7.266803  | -1.090360 | 1.000063  |
| N       | -0.230939 | -3.788858 | 1.077368  | H       | 4.387815  | -0.337985 | 2.008253  | N       | 6.193430  | -3.214514 | 1.097510  |
| C       | 0.000879  | -2.366138 | 0.928822  | C       | 5.672956  | -0.788715 | 0.353526  | H       | 8.102266  | -1.666188 | 1.078691  |
| H       | -0.102011 | -1.907724 | 1.924600  | C       | 4.928079  | -0.009380 | -1.804919 | H       | 5.292738  | -3.655252 | 1.203171  |
| C       | 1.437340  | -2.144362 | 0.447337  | H       | 3.069392  | 1.054886  | -1.825677 | H       | 6.898383  | -3.595314 | 1.707693  |
| C       | -0.988826 | -1.671260 | -0.012631 | H       | 6.410209  | -1.297223 | 0.971967  | S       | 0.272011  | 2.404133  | 1.038197  |
| H       | 2.088207  | -2.662745 | 1.160480  | C       | 5.874464  | -0.673308 | -1.021244 | H       | 1.339599  | 4.255926  | -1.624628 |
| H       | 1.547818  | -2.652927 | -0.519121 | H       | 5.102381  | 0.080143  | -2.872180 | H       | 1.972709  | 4.284963  | -0.132442 |
| C       | 1.851342  | -0.684892 | 0.310389  | O       | 6.965862  | -1.178673 | -1.650629 | N       | 0.331647  | 0.913138  | -1.158636 |
| H       | 1.233348  | -0.199779 | -0.459052 | H       | 7.539794  | -1.592943 | -0.998456 | H       | 0.764642  | 0.636844  | -2.034197 |
| H       | 1.671595  | -0.141390 | 1.247626  | O       | 1.691134  | -2.035939 | 0.567094  | C       | -0.845720 | 0.151004  | -0.808095 |
| C       | 3.321842  | -0.551291 | -0.058981 | C       | 1.780053  | -3.292416 | 1.242337  | H       | -0.853825 | -0.018797 | 0.272772  |
| H       | 3.964135  | -0.943823 | 0.733482  | H       | 2.262385  | -3.170461 | 2.214863  | C       | -2.134357 | 0.911119  | -1.216735 |
| H       | 3.543690  | -1.150701 | -0.956120 | O       | 0.784820  | -3.717276 | 1.391450  | C       | -0.742270 | -1.164091 | -1.551761 |
| N       | 3.683199  | 0.839107  | -0.242155 | H       | 2.378941  | -3.930985 | 0.595013  | H       | -2.046134 | 1.904305  | -0.761261 |
| H       | 3.120565  | 1.327990  | -0.923918 | 78      |           |           |           | H       | -2.117989 | 1.045302  | -2.304320 |
| C       | 5.017413  | 1.195983  | -2.20326  | 'ArgThr |           |           |           | C       | -3.400922 | 0.253066  | -0.786796 |
| N       | 5.917670  | 0.332851  | 0.074165  | N       | -0.871239 | -3.958772 | 0.214760  | O       | -0.148180 | -1.288592 | -2.602435 |
| N       | 5.229808  | 2.552565  | -0.447729 | C       | -0.462951 | -2.594991 | 0.474983  | C       | -4.332637 | -0.345005 | -1.592857 |
| H       | 6.821085  | 0.788521  | 0.183382  | H       | -0.528694 | -2.314207 | 1.546846  | C       | -3.394589 | 0.520705  | 1.812153  |
| H       | 4.460242  | 3.090360  | -0.815296 | C       | 1.006913  | -2.438607 | 0.043841  | C       | -3.882254 | 0.113126  | 0.561369  |
| H       | 6.114589  | 2.777916  | -0.872697 | C       | -1.353858 | -1.607161 | -0.273702 | H       | -4.346372 | -0.442883 | -2.670157 |
|         |           |           |           |         |           |           |           | N       | -5.357758 | -0.852120 | -0.830274 |

|         |           |           |           |         |           |           |           |         |           |           |           |
|---------|-----------|-----------|-----------|---------|-----------|-----------|-----------|---------|-----------|-----------|-----------|
| C       | -5.113378 | -0.583976 | 0.494484  | N       | 0.652222  | -0.132630 | 0.323632  | H       | 2.765337  | -2.141840 | -1.100306 |
| C       | -4.134596 | 0.222052  | 2.944192  | H       | 1.160478  | 0.658105  | 0.737246  | N       | 0.002331  | -0.427405 | 1.078986  |
| H       | -2.457477 | 1.068055  | 1.887509  | C       | -0.745064 | 0.041930  | 0.011544  | H       | 0.454731  | 0.418084  | 1.439279  |
| H       | -6.182093 | -1.299147 | -1.190823 | H       | -0.955919 | -0.477373 | -0.932961 | C       | -1.436198 | -0.462993 | 1.086516  |
| C       | -5.861648 | -0.885437 | 1.633518  | C       | -1.639849 | -0.585096 | 1.095113  | H       | -1.756771 | -1.507724 | 1.024832  |
| C       | -5.353602 | -0.474080 | 2.855548  | C       | -1.007121 | 1.524515  | -0.181110 | C       | -1.983938 | 0.190388  | 2.352391  |
| H       | -3.771414 | 0.532610  | 3.919322  | H       | -1.287586 | -1.615406 | 1.225900  | C       | -1.968846 | 0.244872  | -0.159490 |
| H       | -6.805538 | -1.419322 | 1.567130  | H       | -1.538419 | -0.058745 | 2.046476  | H       | -1.658790 | 1.233415  | 2.426520  |
| H       | -5.910244 | -0.691218 | 3.762529  | C       | -3.108074 | -0.650808 | 0.753796  | H       | -3.075368 | 0.167687  | 2.344292  |
| O       | -1.397431 | -2.141863 | -0.937533 | O       | -0.161227 | 2.385951  | -0.152057 | H       | -1.627159 | -0.346816 | 3.234546  |
| C       | -1.419225 | -3.390659 | -1.631516 | O       | -4.006419 | -0.356880 | 1.504714  | O       | -1.328755 | 0.975843  | -0.876646 |
| H       | -1.910103 | -3.280001 | -2.601249 | O       | -2.306199 | 1.754393  | -0.392211 | O       | -3.268291 | -0.024823 | -0.329023 |
| H       | -0.403066 | -3.758846 | -1.789886 | C       | -2.661537 | 3.127349  | -0.561672 | C       | -3.871035 | 0.598878  | -1.462082 |
| H       | -1.981172 | -4.070833 | -0.993360 | H       | -3.744909 | 3.139612  | -0.671636 | H       | -4.911120 | 0.274697  | -1.461701 |
|         |           |           |           | H       | -2.357014 | 3.711350  | 0.309557  | H       | -3.808354 | 1.687082  | -1.382357 |
| 80      |           |           |           | H       | -2.179116 | 3.539409  | -1.451196 | H       | -3.371494 | 0.282805  | -2.380814 |
| 'ArgVal |           |           |           | O       | -3.297566 | -1.133674 | -0.483523 |         |           |           |           |
| N       | 0.014344  | -3.760374 | -1.045110 | C       | -4.660444 | -1.240440 | -0.883423 | 84      |           |           |           |
| C       | -0.225163 | -2.338828 | -0.892084 | H       | -5.137038 | -0.256655 | -0.885846 | 'AsnArg |           |           |           |
| H       | -0.115348 | -1.876246 | -1.885116 | H       | -4.643469 | -1.659344 | -1.889101 | N       | -3.999870 | -2.643415 | -0.706355 |
| C       | -1.666351 | -2.125367 | -0.422762 | H       | -5.212380 | -1.895079 | -0.204610 | C       | -3.473100 | -1.299496 | -0.606954 |
| C       | 0.757141  | -1.645773 | 0.058432  |         |           |           |           | H       | -3.373994 | -0.892147 | -1.619870 |
| H       | -2.307943 | -2.651860 | -1.138386 | 82      |           |           |           | C       | -4.489420 | -0.420034 | 0.128113  |
| H       | -1.781542 | -2.629244 | 0.545599  | 'AsnGlu |           |           |           | C       | -2.095453 | -1.194228 | 0.074552  |
| C       | -2.091247 | -0.667814 | -0.298935 | N       | -2.908105 | -3.104966 | -0.305336 | H       | -5.485005 | -0.776138 | -0.177597 |
| H       | -1.484033 | -0.173451 | 0.473302  | C       | -2.634349 | -1.689970 | -0.424270 | H       | -4.418196 | -0.569975 | 1.212724  |
| H       | -1.905497 | -0.129194 | -1.237850 | H       | -2.528132 | -1.448211 | -1.488377 | C       | -4.365762 | 1.052872  | -0.213961 |
| C       | -3.566385 | -0.541827 | 0.053881  | C       | -3.845299 | -0.902700 | 0.091573  | O       | -3.617463 | 1.476968  | -1.086246 |
| H       | -4.196580 | -0.953045 | -0.738878 | C       | -1.351835 | -1.214088 | 0.285160  | N       | -5.168530 | 1.877846  | 0.498811  |
| H       | -3.792271 | -1.129045 | 0.958009  | H       | -4.733288 | -1.502490 | -0.141923 | H       | -5.157391 | 2.859808  | 0.276782  |
| N       | -3.942526 | 0.847904  | 0.210883  | H       | -3.808620 | -0.799190 | 1.183465  | H       | -5.812391 | 1.536112  | 1.190627  |
| H       | -3.385253 | 1.356007  | 0.882859  | C       | -3.998689 | 0.459995  | -0.557830 | S       | -1.609829 | -2.312830 | 1.215634  |
| C       | -5.280200 | 1.190217  | 0.180912  | O       | -3.243738 | 0.876343  | -1.429034 | H       | -3.395796 | -3.248138 | -1.317023 |
| N       | -6.171231 | 0.311542  | -0.095231 | N       | -5.051699 | 1.189410  | -0.122114 | H       | -3.898474 | -3.084013 | 0.208040  |
| N       | -5.507184 | 2.549119  | 0.379045  | H       | -5.217636 | 2.085616  | -0.550045 | N       | -1.372297 | -0.143982 | -0.304118 |
| H       | -7.079119 | 0.755506  | -0.215256 | H       | -5.705770 | 0.838735  | 0.555647  | H       | -1.805209 | 0.550517  | -0.918216 |
| H       | -4.742788 | 3.103403  | 0.732529  | S       | -0.699227 | -2.065762 | 1.562750  | C       | -0.059886 | 0.169415  | 0.221721  |
| H       | -6.393718 | 2.774203  | 0.800443  | H       | -2.172650 | -3.620550 | -0.780267 | H       | -0.036039 | -0.095130 | 1.284909  |
| S       | 1.064750  | -2.244798 | 1.581682  | H       | -2.802705 | -3.362297 | 0.675775  | C       | 1.032151  | -0.629947 | -0.516304 |
| H       | 0.959076  | -3.914866 | -1.385434 | N       | -0.849891 | -0.075645 | -0.190710 | C       | 0.152420  | 1.660134  | 0.052278  |
| H       | -0.015778 | -4.181802 | -0.118391 | H       | -1.384206 | 0.433980  | -0.901270 | H       | 0.682556  | -1.668873 | -0.536759 |
| N       | 1.317678  | -0.540504 | -0.437513 | C       | 0.329516  | 0.565450  | 0.347094  | H       | 1.076611  | -0.279031 | -1.555193 |
| H       | 1.022843  | -0.190244 | -1.343492 | H       | 0.344856  | 0.408479  | 1.432452  | C       | 2.408739  | -0.565433 | 0.132480  |
| C       | 2.227866  | 0.327560  | 0.276686  | C       | 1.608295  | -0.047998 | -0.259184 | O       | -0.383924 | 2.329994  | -0.799416 |
| H       | 1.915046  | 0.367615  | 1.327267  | C       | 0.225164  | 2.047000  | 0.043831  | H       | 2.784304  | 0.461000  | 0.163151  |
| C       | 3.684424  | -0.208118 | 0.227110  | H       | 1.482176  | -1.133015 | -0.222869 | H       | 2.335909  | -0.919880 | 1.169947  |
| C       | 2.085155  | 1.697995  | -0.356175 | H       | 1.673755  | 0.240325  | -1.315034 | C       | 3.422804  | -1.416445 | -0.628430 |
| H       | 3.576237  | -1.264013 | 0.503766  | C       | 2.882588  | 0.329017  | 0.490343  | H       | 3.083855  | -2.458192 | -0.682690 |
| C       | 4.278497  | -0.126352 | -1.175382 | O       | -0.454179 | 2.518106  | -0.837267 | H       | 3.518164  | -1.042644 | -1.651888 |
| C       | 4.578861  | 0.452726  | 1.469821  | H       | 3.039000  | 1.408005  | 0.531976  | N       | 4.753383  | -1.414155 | -0.054709 |
| O       | 1.573819  | 1.890775  | -1.438237 | H       | 2.804723  | -0.024451 | 1.527391  | H       | 4.824745  | -1.838597 | 0.859471  |
| H       | 4.454623  | 0.911687  | -1.481448 | C       | 4.139599  | -0.269933 | -0.090313 | C       | 5.558640  | -0.304032 | -0.215706 |
| H       | 5.241349  | -0.644569 | -1.209228 | O       | 5.198697  | 0.304158  | -0.183909 | N       | 5.189664  | 0.677633  | -0.952337 |
| H       | 3.624955  | -0.590449 | -1.920582 | O       | 1.004363  | 2.768356  | 0.857223  | N       | 6.741264  | -0.412946 | 0.517542  |
| H       | 4.155586  | 0.351376  | 2.274120  | C       | 1.012520  | 4.173693  | 0.594015  | H       | 5.947604  | 1.346929  | -1.065245 |
| H       | 5.562973  | -0.025980 | 1.272532  | H       | 1.697047  | 4.605875  | 1.322527  | H       | 7.143236  | -1.340649 | 0.513897  |
| H       | 4.721988  | 1.517962  | 1.067667  | H       | 1.357261  | 4.371788  | -0.423433 | H       | 7.425923  | 0.293433  | 0.294261  |
| O       | 2.603510  | 2.661916  | 0.403702  | H       | 0.009466  | 4.589239  | 0.713846  | O       | 1.030754  | 2.134864  | 0.939507  |
| C       | 2.541077  | 3.976271  | -0.157847 | O       | 3.956574  | -1.545035 | -0.473223 | C       | 1.362340  | 3.515437  | 0.778286  |
| H       | 3.002417  | 4.632517  | 0.578621  | C       | 5.116485  | -2.185770 | -0.999105 | H       | 2.073544  | 3.741874  | 1.571468  |
| H       | 3.085452  | 4.015159  | -1.104017 | H       | 4.802942  | -3.193938 | -1.268477 | H       | 1.813654  | 3.687806  | -0.201499 |
| H       | 1.503070  | 4.265854  | -0.335732 | H       | 5.488437  | -1.651515 | -1.876885 | H       | 0.468592  | 4.136663  | 0.871495  |
|         |           |           |           | H       | 5.911141  | -2.219400 | -0.249596 |         |           |           |           |
| 81      |           |           |           | 83      |           |           |           | 85      |           |           |           |
| 'AsnAsp |           |           |           | 'AsnAla |           |           |           | 'AsnAsn |           |           |           |
| N       | 3.552871  | -2.408174 | 0.352515  | N       | 3.161031  | -1.712060 | -0.264262 | N       | 3.430205  | -2.261873 | 0.393355  |
| C       | 2.837959  | -1.153831 | 0.412253  | C       | 2.220548  | -0.721127 | 0.206691  | C       | 2.620076  | -1.067321 | 0.466856  |
| H       | 2.868057  | -0.791265 | 1.447144  | H       | 2.519221  | -0.412734 | 1.216249  | H       | 2.589326  | -0.738102 | 1.512996  |
| C       | 3.575122  | -0.111626 | -0.446257 | C       | 2.308324  | 0.522273  | -0.692100 | C       | 3.303335  | 0.055022  | -0.333100 |
| C       | 1.350527  | -1.223871 | 0.009923  | C       | 0.753489  | -1.179072 | 0.270233  | C       | 1.157663  | -1.231484 | 0.003841  |
| H       | 4.625794  | -0.420527 | -0.486493 | H       | 3.354227  | 0.610394  | -1.009205 | H       | 4.378163  | -0.159118 | -0.325806 |
| H       | 3.201089  | -0.112730 | -1.478236 | H       | 1.703726  | 0.382598  | -1.596855 | H       | 2.980769  | 0.042739  | -1.382263 |
| C       | 3.494271  | 1.297219  | 0.112247  | H       | 1.703726  | 0.382598  | -1.596855 | C       | 3.077894  | 1.441549  | 0.241840  |
| O       | 2.756797  | 1.607874  | 1.042701  | C       | 1.903621  | 1.817634  | -0.013696 | O       | 2.310164  | 1.667313  | 1.173538  |
| N       | 4.308309  | 2.199494  | -0.477339 | O       | 1.565292  | 1.892577  | 1.165975  | N       | 3.809440  | 2.425372  | -0.324274 |
| H       | 4.263588  | 3.155371  | -0.163976 | N       | 1.996938  | 2.920025  | -0.788703 | H       | 3.637359  | 3.372016  | -0.027168 |
| H       | 4.924424  | 1.956571  | -1.233181 | H       | 1.661272  | 3.789577  | -0.407501 | H       | 4.401497  | 2.261516  | -1.119853 |
| S       | 0.714142  | -2.550289 | -0.772367 | H       | 2.152731  | 2.855044  | -1.779905 | S       | 0.642922  | -2.572488 | -0.837329 |
| H       | 3.159119  | -3.039726 | 1.044115  | S       | 0.185876  | -2.443751 | -0.648354 | H       | 3.057380  | -2.946015 | 1.045520  |
| H       | 3.335396  | -2.853131 | -0.538447 | H       | 3.199933  | -2.470061 | 0.411226  | H       | 3.277952  | -2.688309 | -0.520122 |

|         |           |           |           |         |           |           |           |         |           |           |           |
|---------|-----------|-----------|-----------|---------|-----------|-----------|-----------|---------|-----------|-----------|-----------|
| N       | 0.380014  | -0.195346 | 0.315798  | O       | -0.274310 | 2.274605  | 0.829491  | H       | -5.029611 | -1.913223 | -1.243096 |
| H       | 0.833378  | 0.602915  | 0.772721  | C       | -3.648818 | 0.178063  | 1.173758  | O       | -1.734421 | 2.375615  | -0.801113 |
| C       | -1.000063 | -0.062232 | -0.090406 | C       | -3.210737 | -1.519956 | -0.471407 | C       | -1.939926 | 3.779226  | -0.623529 |
| H       | -1.121096 | -0.521013 | -1.084251 | H       | -3.301388 | 0.822096  | 1.978845  | H       | -2.776985 | 4.039002  | -1.270253 |
| C       | -1.961420 | -0.806340 | 0.834787  | C       | -4.982494 | 0.222094  | 0.776102  | H       | -2.175195 | 4.003146  | 0.419410  |
| C       | -1.291899 | 1.419555  | -0.251457 | C       | -4.541814 | -1.476895 | -0.871543 | H       | -1.044660 | 4.335190  | -0.910863 |
| H       | -1.506554 | -1.780524 | 1.052991  | H       | -2.517122 | -2.204817 | -0.954461 |         |           |           |           |
| H       | -2.099591 | -0.725896 | -1.282676 | H       | -5.672018 | 0.899693  | 1.271967  | 90      |           |           |           |
| C       | -3.292748 | -1.081829 | 0.152049  | C       | -5.432066 | -0.604896 | -0.248974 | 'AsnIle |           |           |           |
| O       | -0.456354 | 2.247336  | -0.530389 | H       | -4.886997 | -2.129517 | -1.668492 | N       | 3.188653  | -2.395120 | 0.515806  |
| O       | -3.418078 | -1.107856 | -1.058917 | H       | -6.472852 | -0.574497 | -0.558385 | C       | 2.508227  | -1.118946 | 0.487715  |
| N       | -4.326356 | -1.329032 | 0.999669  | O       | -1.529988 | 1.826736  | -0.985631 | H       | 2.381836  | -0.773123 | 1.520370  |
| H       | -5.198758 | -1.630877 | 0.598031  | C       | -1.991611 | 3.177730  | -0.964079 | C       | 3.402543  | -0.093240 | -0.217694 |
| H       | -4.199721 | -1.395194 | 1.994255  | H       | -2.626645 | 3.286239  | -1.842161 | C       | 1.113261  | -1.141805 | -0.167405 |
| O       | -2.585542 | 1.696287  | -0.070450 | H       | -2.564822 | 3.368117  | -0.053477 | H       | 4.438477  | -0.353232 | 0.032136  |
| C       | -2.949485 | 3.056935  | -0.298340 | H       | -1.149680 | 3.872416  | -1.005603 | H       | 3.306226  | -0.177220 | -1.307561 |
| H       | -4.022382 | 3.109379  | -0.118062 |         |           |           |           | C       | 3.145143  | 1.334374  | 0.226681  |
| H       | -2.409529 | 3.718322  | 0.383508  | 88      |           |           |           | O       | 2.358747  | 1.626162  | 1.120001  |
| H       | -2.719698 | 3.346350  | -1.326431 | 'AsnGly |           |           |           | N       | 3.870042  | 2.277424  | -0.418924 |
|         |           |           |           | N       | 3.080710  | -1.366415 | 1.202203  | C       | 3.763625  | 3.236664  | -0.132095 |
| 86      |           |           |           | C       | 2.063869  | -0.424311 | 0.787427  | H       | 4.547091  | 2.046050  | -1.124725 |
| 'AsnCys |           |           |           | H       | 1.700204  | 0.104615  | 1.676283  | S       | 0.718883  | -2.286283 | -1.316623 |
| N       | -3.405136 | -2.011158 | -0.572718 | C       | 2.704523  | 0.624169  | -0.126459 | H       | 2.663466  | -3.031855 | 1.108312  |
| C       | -2.541392 | -0.852885 | -0.520811 | C       | 0.847778  | -1.060150 | 0.091033  | H       | 3.121042  | -2.803667 | -0.416258 |
| H       | -2.426762 | -0.462158 | -1.538843 | H       | 3.700557  | 0.833702  | 0.282586  | N       | 0.296286  | -0.172526 | 0.241006  |
| C       | -3.227728 | 0.244277  | 0.302175  | H       | 2.852492  | 0.215426  | -1.133959 | H       | 0.679168  | 0.560363  | 0.845067  |
| C       | -1.128087 | -1.121078 | 0.032610  | C       | 1.928934  | 1.926087  | -0.192446 | C       | -1.045302 | 0.017336  | -0.269398 |
| H       | -4.305247 | 0.142331  | 0.125242  | O       | 0.961142  | 2.168849  | 0.519044  | H       | -1.049831 | -0.259812 | -1.330240 |
| H       | -3.064773 | 0.086546  | 1.372882  | N       | 2.399513  | 2.829101  | -1.084675 | C       | -2.063036 | -0.896400 | 0.467381  |
| C       | -2.803941 | 1.647368  | -0.089888 | H       | 1.953574  | 3.730748  | -1.128495 | C       | -1.379930 | 1.487669  | -0.127034 |
| O       | -2.010210 | 1.880282  | -0.994477 | H       | 3.217216  | 2.657285  | -1.643281 | H       | -1.584429 | -1.884477 | 0.444556  |
| N       | -3.383593 | 2.642084  | 0.620563  | S       | 0.978389  | -2.469135 | -0.790022 | C       | -2.248982 | -0.475015 | 1.922138  |
| H       | -3.164695 | 3.592968  | 0.372000  | H       | 2.690992  | -1.973830 | 1.917368  | C       | -3.382095 | -1.015821 | -0.301459 |
| H       | -4.071557 | 2.464965  | 1.331563  | H       | 3.267131  | -1.986987 | 0.414368  | O       | -0.833966 | 2.243071  | 0.643115  |
| S       | -0.824256 | -2.402169 | 1.054716  | N       | -0.289211 | -0.385754 | 0.238189  | H       | -2.801269 | 0.468838  | 2.001040  |
| H       | -3.020728 | -2.677026 | -1.236807 | H       | -0.263205 | 0.533713  | 0.683754  | H       | -2.805836 | -1.232488 | 2.479857  |
| H       | -3.344494 | -2.487059 | 0.327048  | C       | -1.529590 | -0.797993 | -0.353591 | H       | -1.285905 | -0.339497 | 2.423447  |
| N       | -0.209546 | -0.235864 | -0.355583 | C       | -2.643833 | 0.093477  | 0.135897  | H       | -3.905200 | -0.052185 | -0.295495 |
| H       | -0.516286 | 0.577948  | -0.898171 | H       | -1.486784 | -0.768384 | -1.450885 | H       | -3.151916 | -1.232258 | -1.352295 |
| C       | 1.168514  | -0.258469 | 0.081513  | H       | -1.745521 | -1.842665 | -0.098684 | C       | -4.301113 | -2.105617 | 0.238779  |
| H       | 1.212583  | -0.590243 | 1.124750  | O       | -2.503124 | 1.022468  | 0.894738  | H       | -4.640429 | -1.890492 | 1.256787  |
| C       | 1.967095  | -1.247194 | -0.784185 | O       | -3.811607 | -0.285522 | -0.390041 | H       | -5.193051 | -2.206399 | -0.386997 |
| C       | 1.718978  | 1.149670  | -0.050417 | C       | -4.935881 | 0.498496  | 0.012215  | H       | -3.795238 | -3.077284 | 0.253402  |
| H       | 1.472645  | -2.215924 | -0.685433 | H       | -4.800670 | 1.542073  | -0.281597 | O       | -2.374999 | 1.847948  | -0.945598 |
| H       | 1.930986  | -0.919299 | -1.826892 | H       | -5.795461 | 0.065063  | -0.497263 | C       | -2.782327 | 3.212277  | -0.830880 |
| S       | 3.700684  | -1.407601 | -0.222670 | H       | -5.067925 | 0.451865  | 1.095733  | H       | -3.590169 | 3.340679  | -1.550179 |
| O       | 1.299965  | 1.971668  | -0.830403 |         |           |           |           | H       | -3.131210 | 3.426583  | 0.182124  |
| H       | 3.913846  | -2.587501 | -0.830039 | 89      |           |           |           | H       | -1.950031 | 3.880555  | -1.063591 |
| O       | 2.743170  | 1.342822  | 0.780317  | 'AsnGln |           |           |           |         |           |           |           |
| C       | 3.405986  | 2.601998  | 0.645282  | N       | 3.020779  | -2.814795 | 0.635545  | 91      |           |           |           |
| H       | 4.208778  | 2.591457  | 1.380726  | C       | 2.614477  | -1.428334 | 0.567632  | 'AsnHis |           |           |           |
| H       | 3.810320  | 2.712755  | -0.363337 | H       | 2.551558  | -1.036403 | 1.589521  | N       | -3.684915 | -2.482517 | -0.390611 |
| H       | 2.710506  | 3.420839  | 0.842563  | C       | 3.703513  | -0.624278 | -0.151329 | C       | -2.973111 | -1.226629 | -0.465100 |
|         |           |           |           | C       | 1.248895  | -1.186542 | -0.103989 | H       | -2.888175 | -0.943037 | -1.521222 |
| 87      |           |           |           | H       | 4.662972  | -1.080938 | 0.120489  | C       | -3.809142 | -0.140849 | 0.226239  |
| 'AsnPhe |           |           |           | H       | 3.602580  | -0.718241 | -1.239977 | C       | -1.546740 | -1.249682 | 0.122048  |
| N       | 3.877180  | -2.402187 | 0.692622  | C       | 3.734788  | 0.838516  | 0.250354  | H       | -4.861172 | -0.411066 | 0.076189  |
| C       | 3.213488  | -1.122677 | 0.575934  | O       | 3.005238  | 1.312010  | 1.113331  | H       | -3.631585 | -0.144630 | 1.309405  |
| H       | 3.175940  | -0.664130 | 1.571255  | N       | 4.650888  | 1.593682  | -0.399797 | C       | -3.581374 | 1.254249  | -0.324277 |
| C       | 4.061825  | -0.201650 | -0.309465 | H       | 4.741924  | 2.560962  | -0.135452 | O       | -2.754940 | 1.512477  | -1.193899 |
| C       | 1.767955  | -1.186074 | 0.043317  | H       | 5.288554  | 1.204726  | -1.072219 | N       | -4.373517 | 2.214072  | 0.204341  |
| H       | 5.109929  | -0.469556 | -0.129218 | S       | 0.639963  | -2.254651 | -1.235102 | H       | -4.284697 | 3.152512  | -0.149752 |
| H       | 3.862623  | -0.391966 | -1.371798 | H       | 2.378530  | -3.314297 | 1.244027  | H       | -5.091106 | 2.008216  | 0.877388  |
| C       | 3.878820  | 1.272977  | -0.003239 | H       | 2.871826  | -3.227424 | -0.285127 | S       | -1.085462 | -2.387810 | 1.247001  |
| O       | 3.126168  | 1.691194  | 0.869635  | N       | 0.636078  | -0.067187 | 0.272415  | H       | -3.207651 | -3.163603 | -0.974194 |
| N       | 4.627241  | 2.112004  | -0.755859 | H       | 1.145458  | 0.592582  | 0.867889  | H       | -3.578300 | -2.845310 | 0.556525  |
| H       | 4.569703  | 3.099227  | -0.566385 | C       | -0.640446 | 0.357159  | -0.258216 | N       | -0.760828 | -0.274098 | -0.333093 |
| H       | 5.283939  | 1.779561  | -1.440221 | H       | -0.662528 | 0.117620  | -1.329165 | H       | -1.181237 | 0.414741  | -0.963654 |
| S       | 1.246503  | -2.461413 | -0.898581 | C       | -1.807935 | -0.373215 | 0.439239  | C       | 0.605806  | -0.055591 | 0.100019  |
| H       | 3.394264  | -2.957437 | 1.393186  | C       | -0.738943 | 1.857188  | -0.070964 | H       | 0.683598  | -0.344104 | 1.151958  |
| H       | 3.728540  | -2.911289 | -0.178399 | H       | -1.469973 | -1.397331 | 0.623386  | C       | 1.571733  | -0.894139 | -0.748186 |
| N       | 1.015654  | -0.140475 | 0.378746  | H       | -2.019217 | 0.078981  | 1.413172  | C       | 0.909342  | 1.424118  | -0.075251 |
| H       | 1.461683  | 0.632853  | 0.880680  | C       | -3.082633 | -0.414505 | -0.390200 | H       | 1.252045  | -1.939544 | -0.652635 |
| C       | -0.365866 | 0.021817  | -0.016669 | O       | -0.030612 | 2.506440  | 0.660819  | H       | 1.431695  | -0.594347 | -1.794230 |
| H       | -0.498548 | -0.386952 | -1.022627 | H       | -3.355962 | 0.595272  | -0.719286 | C       | 3.000570  | -0.729343 | -0.351513 |
| C       | -1.300481 | -0.729215 | 0.962674  | H       | -2.921690 | -1.012021 | -1.295605 | O       | 0.801082  | 2.002780  | -1.130749 |
| C       | -0.692343 | 1.501017  | -0.001151 | C       | -4.249171 | -0.949599 | 0.423366  | N       | 4.034623  | -1.057745 | -1.197517 |
| H       | -0.939662 | -1.762585 | 0.992848  | O       | -4.367843 | -0.737497 | 1.618395  | C       | 3.625303  | -0.298981 | 0.794564  |
| H       | -1.164218 | -0.293358 | 1.958116  | N       | -5.179366 | -1.641467 | -0.287536 | H       | 3.938380  | -1.406810 | -2.137131 |
| C       | -2.747892 | -0.691864 | 0.555592  | H       | -5.960244 | -2.031061 | 0.214750  | C       | 5.200725  | -0.817197 | -0.539475 |

|         |           |           |           |         |           |           |           |         |           |           |           |
|---------|-----------|-----------|-----------|---------|-----------|-----------|-----------|---------|-----------|-----------|-----------|
| N       | 4.990208  | -0.355452 | 0.667573  | C       | 4.102965  | -0.869224 | -0.530309 | C       | 1.555483  | 1.305895  | -0.319496 |
| H       | 3.161231  | 0.056373  | 1.703848  | H       | 3.893147  | -1.945383 | -0.513556 | H       | 3.918422  | -2.093057 | 1.390128  |
| H       | 6.167050  | -0.994850 | -0.991977 | H       | 4.139082  | -0.578507 | -1.590794 | H       | 2.490341  | -1.849209 | 2.408294  |
| O       | 1.298382  | 1.995074  | 1.065310  | C       | 5.470331  | -0.636111 | 0.096497  | H       | 3.666585  | 0.093965  | 0.366274  |
| C       | 1.662525  | 3.372894  | 0.954768  | H       | 5.675205  | 0.450935  | 0.114906  | H       | 3.257924  | 0.465841  | 2.045560  |
| H       | 1.919489  | 3.691974  | 1.963806  | H       | 5.440242  | -0.959860 | 1.144697  | O       | 1.371350  | 1.167297  | -1.505047 |
| H       | 2.520710  | 3.484502  | 0.288104  | N       | 6.487129  | -1.424735 | -0.585571 | O       | 1.851757  | 2.467375  | 0.269064  |
| H       | 0.828088  | 3.958374  | 0.562394  | H       | 6.602246  | -1.084300 | -1.535542 | C       | 1.951061  | 3.590460  | -0.611595 |
|         |           |           |           | H       | 7.385874  | -1.303855 | -0.130666 | H       | 1.000991  | 3.757083  | -1.124150 |
|         |           |           |           | O       | 1.265862  | 2.455980  | 0.899540  | H       | 2.197978  | 4.440753  | 0.022259  |
| 92      |           |           |           | C       | 1.400482  | 3.866067  | 0.713746  | H       | 2.732331  | 3.424852  | -1.356756 |
| 'AsnLeu |           |           |           | H       | 2.065357  | 4.206273  | 1.506638  |         |           |           |           |
| N       | 3.242481  | -2.453813 | 0.495453  | H       | 1.827167  | 4.086536  | -0.267668 | 96      |           |           |           |
| C       | 2.583901  | -1.166172 | 0.499868  | H       | 0.427168  | 4.356063  | 0.791007  | 'AsnSer |           |           |           |
| H       | 2.507898  | -0.822088 | 1.538121  |         |           |           |           | N       | -3.475772 | -1.562374 | -0.509205 |
| C       | 3.465100  | -0.153375 | -0.240669 | 94      |           |           |           | C       | -2.415629 | -0.578967 | -0.499707 |
| C       | 1.160734  | -1.162305 | -0.093216 | 'AsnMet |           |           |           | H       | -2.246647 | -0.245395 | -1.530585 |
| H       | 4.505958  | -0.440241 | -0.047401 | N       | -3.147713 | -2.840797 | -0.510530 | C       | -2.882121 | 0.646445  | 0.295743  |
| H       | 3.311241  | -0.222445 | -1.325037 | C       | -2.724128 | -1.458062 | -0.505281 | C       | -1.066384 | -1.083071 | 0.050721  |
| C       | 3.264545  | 1.275878  | 0.227223  | H       | -2.676417 | -1.107807 | -1.543115 | H       | -3.961327 | 0.740569  | 0.124680  |
| O       | 2.507939  | 1.583100  | 1.141151  | C       | -3.790583 | -0.613501 | 0.201944  | H       | -2.742941 | 0.486440  | 1.372514  |
| N       | 4.004025  | 2.202973  | -0.424875 | C       | -1.342236 | -1.206309 | 0.129524  | C       | -2.211134 | 1.939037  | -0.129452 |
| H       | 3.936070  | 3.161460  | -0.124163 | H       | -4.758848 | -1.076143 | -0.024637 | O       | -1.390101 | 2.004472  | -1.037730 |
| H       | 4.661877  | 1.957636  | -1.144015 | H       | -3.663781 | -0.657700 | 1.291105  | N       | -2.599242 | 3.038768  | 0.556364  |
| S       | 0.683020  | -2.314803 | -1.202036 | C       | -3.824567 | 0.829984  | -0.263674 | H       | -2.210484 | 3.927994  | 0.287991  |
| H       | 2.733341  | -3.082198 | 1.110476  | O       | -3.097640 | 1.266867  | -1.148423 | H       | -3.303470 | 3.005346  | 1.272695  |
| H       | 3.124289  | -2.859917 | -0.432651 | N       | -4.738916 | 1.612132  | 0.355783  | S       | -0.988530 | -2.364283 | 1.113733  |
| N       | 0.391725  | -0.163907 | 0.334566  | H       | -4.831484 | 2.566957  | 0.049872  | H       | -3.226968 | -2.304622 | -1.156848 |
| H       | 0.813457  | 0.550448  | 0.934843  | H       | -5.377251 | 1.251340  | 1.043148  | H       | -3.485502 | -2.016981 | 0.403740  |
| C       | -0.975750 | 0.049086  | -0.093729 | S       | -0.706514 | -2.251025 | 1.264832  | N       | -0.012406 | -0.388496 | -0.377312 |
| H       | -1.062049 | -0.271063 | -1.136654 | H       | -2.522820 | -3.371828 | -1.110340 | H       | -0.186610 | 0.441566  | -0.951198 |
| C       | -1.940519 | -0.776180 | 0.781281  | H       | -2.984898 | -3.219100 | 0.422405  | C       | 1.352047  | -0.637427 | 0.033431  |
| C       | -1.267221 | 1.530703  | 0.019991  | N       | -0.737886 | -0.094204 | -0.285316 | H       | 1.363135  | -1.003693 | 1.063455  |
| H       | -1.586806 | -1.812921 | 0.720816  | H       | -1.259928 | 0.548724  | -0.888591 | C       | 1.985945  | -1.692782 | -0.877979 |
| H       | -1.810654 | -0.448277 | 1.820494  | C       | 0.551925  | 0.340644  | 0.202215  | C       | 2.128915  | 0.660076  | -0.088559 |
| C       | -3.424511 | -0.731809 | 0.403774  | H       | 0.622151  | 0.088206  | 1.267439  | H       | 1.403436  | -2.617337 | -0.765822 |
| O       | -0.739482 | 2.272343  | 0.815049  | C       | 1.693829  | -0.375487 | -0.552389 | H       | 1.897395  | -1.340358 | -1.917175 |
| H       | -3.778545 | 0.304639  | 0.492987  | C       | 0.626887  | 1.843709  | 0.023298  | O       | 3.327406  | -1.844756 | -0.480559 |
| C       | -3.671940 | -1.193669 | -1.030848 | H       | 1.393801  | -1.423933 | -0.645035 | O       | 2.003722  | 1.424608  | -1.017418 |
| C       | -4.218080 | -1.583870 | 1.392887  | H       | 1.770208  | 0.038254  | -1.564996 | H       | 3.718098  | -2.545042 | -1.010348 |
| H       | -3.241862 | -2.187508 | -1.200652 | C       | 3.033645  | -0.307335 | 0.165888  | O       | 2.966343  | 0.836946  | 0.931205  |
| H       | -4.745638 | -1.251659 | -1.237834 | O       | -0.060465 | 2.476776  | -0.742267 | C       | 3.796459  | 1.993866  | 0.830746  |
| H       | -3.234273 | -0.506928 | -1.760637 | H       | 3.337778  | 0.728667  | 0.342257  | H       | 4.409556  | 1.996589  | 1.731014  |
| H       | -4.066880 | -1.249661 | 2.424886  | H       | 2.953149  | -0.811541 | 1.136163  | H       | 4.424923  | 1.935133  | -0.061046 |
| H       | -5.290595 | -1.538074 | 1.178123  | S       | 4.299596  | -1.140530 | -0.838005 | H       | 3.188273  | 2.899870  | 0.774630  |
| H       | -3.912041 | -2.634998 | 1.334106  | C       | 5.715706  | -0.959304 | 0.269792  |         |           |           |           |
| O       | -2.208501 | 1.913852  | -0.850871 | H       | 5.544920  | -1.471419 | 1.220818  | 97      |           |           |           |
| C       | -2.588386 | 3.288006  | -0.759353 | H       | 6.572839  | -1.420727 | -0.225365 | 'AsnTyr |           |           |           |
| H       | -3.354746 | 3.433977  | -1.519478 | H       | 5.945350  | 0.093790  | 0.455614  | N       | 4.179450  | -2.442843 | 0.648761  |
| H       | -2.983779 | 3.512668  | 0.234126  | O       | 1.572309  | 2.383249  | 0.801674  | C       | 3.526115  | -1.156806 | 0.546135  |
| H       | -1.729085 | 3.935104  | -0.949761 | C       | 1.745565  | 3.793564  | 0.644558  | H       | 3.506307  | -0.702037 | 1.543724  |
|         |           |           |           | H       | 2.540861  | 4.071815  | 1.334800  | C       | 4.370981  | -0.240017 | -0.347206 |
| 93      |           |           |           | H       | 2.025791  | 4.034053  | -0.383607 | C       | 2.072747  | -1.204353 | 0.033326  |
| 'AsnLys |           |           |           | H       | 0.820995  | 4.320785  | 0.890140  | H       | 5.418501  | -0.522687 | -0.187419 |
| N       | -3.154750 | -2.936443 | -0.547526 |         |           |           |           | H       | 4.150774  | -0.419459 | -1.407300 |
| C       | -2.769854 | -1.542089 | -0.545160 | 95      |           |           |           | C       | 4.212431  | 1.234683  | -0.027988 |
| H       | -2.695865 | -1.202429 | -1.584964 | 'AsnPro |           |           |           | O       | 3.472853  | 1.657763  | 0.853753  |
| C       | -3.882966 | -0.720601 | 0.114169  | N       | -1.676560 | 0.245612  | -1.678358 | N       | 4.967410  | 2.068238  | -0.780164 |
| C       | -1.420245 | -1.244894 | 0.137778  | C       | -1.192151 | -0.121443 | -0.353349 | H       | 4.924907  | 3.054885  | -0.583917 |
| H       | -4.831622 | -1.197528 | -0.161049 | H       | -0.747251 | 0.779487  | 0.079524  | H       | 5.613476  | 1.731311  | -1.472398 |
| H       | -3.806048 | -0.770948 | 1.207669  | C       | -2.350568 | -0.539154 | 0.564653  | S       | 1.523249  | -2.475240 | -0.898395 |
| C       | -3.920551 | 0.724434  | -0.346116 | C       | -0.163405 | -1.254933 | -0.403319 | H       | 3.700443  | -2.996299 | 1.353447  |
| O       | -3.191466 | 1.167828  | -1.225595 | H       | -2.898415 | -1.357722 | 0.081929  | H       | 4.013414  | -2.947103 | -0.221997 |
| N       | -4.843834 | 1.499298  | 0.270035  | H       | -1.965400 | -0.935830 | 1.507362  | N       | 1.338318  | -0.148728 | 0.376674  |
| H       | -4.942218 | 2.453884  | -0.034630 | C       | -3.332502 | 0.566701  | 0.943311  | H       | 1.800655  | 0.617594  | 0.874402  |
| H       | -5.478082 | 1.134338  | 0.958957  | O       | -3.847092 | 0.597856  | 2.050682  | C       | -0.047464 | 0.029771  | 0.002212  |
| S       | -0.822747 | -2.238164 | 1.338714  | N       | -3.588272 | 1.465436  | -0.033833 | H       | -0.201312 | -0.385683 | -0.997822 |
| H       | -2.492810 | -3.456810 | -1.116209 | H       | -4.268935 | 2.183081  | 0.152260  | C       | -0.977375 | -0.697459 | 1.003536  |
| H       | -3.015100 | -3.296466 | 0.396549  | H       | -3.139300 | 1.348537  | -0.941320 | C       | -0.353598 | 1.513069  | 0.010109  |
| N       | -0.817370 | -0.138905 | -0.292074 | S       | -0.564835 | -2.683924 | -1.160467 | H       | -0.639431 | -1.738709 | 1.029905  |
| H       | -1.321393 | 0.465817  | -0.946097 | H       | -0.892400 | 0.614086  | -2.211901 | H       | -0.805852 | -0.262887 | 1.994246  |
| C       | 0.444380  | 0.346152  | 0.227249  | H       | -1.962018 | -0.615464 | -2.144564 | C       | -2.432678 | -0.624039 | 0.633750  |
| H       | 0.486992  | 0.124210  | 1.299659  | N       | 1.019798  | -1.064423 | 0.199421  | O       | 0.065688  | 2.283108  | 0.843652  |
| C       | 1.627833  | -0.350568 | -0.473319 | C       | 2.009050  | -2.135701 | 0.324684  | C       | -3.297532 | 0.271310  | 1.262571  |
| C       | 0.481196  | 1.844109  | 0.005465  | C       | 1.527333  | 0.200524  | 0.726009  | C       | -2.952768 | -1.442454 | -0.375661 |
| H       | 1.407368  | -1.423308 | -0.441649 | H       | 2.533396  | -2.270187 | -0.603453 | H       | -2.919390 | 0.915155  | 2.053593  |
| H       | 1.632891  | -0.049704 | -1.528849 | H       | 1.496704  | -3.073048 | 0.550408  | C       | -4.639494 | 0.353131  | 0.902166  |
| C       | 2.987555  | -0.098503 | 0.167472  | C       | 2.928269  | -1.633006 | 1.427827  | C       | -4.286781 | -1.372036 | -0.747232 |
| O       | -0.102427 | 2.415726  | -0.885524 | C       | 2.966187  | -0.129594 | 1.178746  | H       | -2.295707 | -2.150906 | -0.875317 |
| H       | 3.219851  | 0.973540  | 0.161826  | H       | 0.930989  | 0.544520  | 1.579598  | H       | -5.299502 | 1.053097  | 1.411318  |
| H       | 2.943767  | -0.395279 | 1.224098  |         |           |           |           |         |           |           |           |

































































|                     |           |           |           |                     |           |           |           |                     |           |            |           |
|---------------------|-----------|-----------|-----------|---------------------|-----------|-----------|-----------|---------------------|-----------|------------|-----------|
| H                   | 3.584953  | 3.269740  | -0.966489 | H                   | -6.434068 | -2.458088 | -0.784844 | H                   | 2.271638  | 3.745441   | -0.347022 |
| H                   | 2.207640  | 3.940608  | -0.065301 | H                   | -5.328429 | -3.213676 | 0.407585  | H                   | 1.095660  | 4.357294   | 0.840203  |
| 281                 |           |           |           | 283                 |           |           |           | 285                 |           |            |           |
| <sup>1</sup> ProAsp |           |           |           | <sup>1</sup> ProAla |           |           |           | <sup>1</sup> ProAsn |           |            |           |
| N                   | 4.021675  | -0.793107 | 0.735126  | N                   | -3.272540 | 0.298657  | 0.742752  | N                   | -3.745721 | -0.647374  | -0.814088 |
| C                   | 5.001366  | -0.538724 | -0.318674 | C                   | -4.170285 | -0.299528 | -0.242974 | C                   | -4.774255 | -0.335523  | 0.176995  |
| C                   | 2.945436  | 0.175125  | 0.629601  | C                   | -1.972673 | -0.343150 | 0.656419  | C                   | -2.630517 | 0.268431   | -0.649128 |
| H                   | 4.750141  | -1.035935 | -1.270170 | C                   | -4.091921 | 0.170951  | -1.236840 | H                   | -4.614893 | -0.852104  | 1.137656  |
| H                   | 5.994433  | -0.883380 | -0.010076 | H                   | -5.211626 | -0.218615 | 0.088000  | H                   | -5.765216 | -0.616643  | -0.196563 |
| C                   | 4.927893  | 0.972491  | -0.490105 | C                   | -3.684235 | -1.740424 | -0.312778 | C                   | -4.621290 | 1.167327   | 0.368089  |
| C                   | 3.422796  | 1.218073  | -0.415389 | C                   | -2.168268 | -1.556610 | -0.290334 | C                   | -3.102518 | 1.322234   | 0.385753  |
| H                   | 2.790281  | 0.668248  | 1.604097  | H                   | -1.665866 | -0.696762 | 1.655315  | H                   | -2.410498 | 0.764787   | -1.609529 |
| C                   | 1.591868  | -0.397379 | 0.218975  | C                   | -0.842262 | 0.546150  | 0.146792  | C                   | -1.325891 | -0.375537  | -0.187103 |
| H                   | 5.370738  | 1.322129  | -1.426656 | H                   | -4.035976 | -2.271065 | -1.201736 | H                   | -5.098576 | 1.536002   | 1.280125  |
| H                   | 5.440333  | 1.468488  | 0.341316  | H                   | -4.017842 | -2.291287 | 0.573377  | H                   | -5.052289 | 1.699671   | -0.486941 |
| H                   | 2.964882  | 0.997483  | -1.386375 | H                   | -1.813214 | -1.296032 | -1.293807 | H                   | -2.716496 | 1.057569   | 1.376818  |
| H                   | 3.150837  | 2.241185  | -0.141006 | H                   | -1.616435 | -2.439932 | 0.042886  | H                   | -2.752817 | 2.330577   | 0.147003  |
| S                   | 1.405033  | -1.895269 | -0.476136 | H                   | -1.103183 | 1.929643  | -0.739138 | S                   | -1.257470 | -1.868195  | 0.541474  |
| H                   | 3.644926  | -1.735335 | 0.678073  | S                   | -3.173830 | 1.299413  | 0.597468  | H                   | -3.417220 | -1.604804  | -0.719082 |
| N                   | 0.579969  | 0.445703  | 0.448885  | H                   | 0.369313  | 0.077461  | 0.455453  | N                   | -0.261344 | 0.401375   | -0.404130 |
| H                   | 0.769446  | 1.369351  | 0.826100  | N                   | 0.456036  | -0.805611 | 0.948735  | H                   | -0.396597 | 1.333890   | -0.783842 |
| C                   | -0.791970 | 0.231359  | 0.062342  | H                   | 1.622471  | 0.645536  | 0.016724  | C                   | 1.085938  | 0.144378   | 0.047867  |
| H                   | -0.822079 | -0.253344 | -0.920767 | C                   | 1.501535  | 0.999419  | -1.014658 | H                   | 1.081606  | -0.197400  | 1.093368  |
| C                   | -1.531636 | -0.674766 | 1.066110  | H                   | 2.073494  | 1.819859  | 0.889619  | C                   | 1.793952  | -0.5941039 | 0.757179  |
| C                   | -1.439839 | 1.602910  | -0.013692 | C                   | 2.644385  | -0.474377 | 0.045960  | C                   | 1.814777  | 1.475239   | -0.031931 |
| H                   | -0.938288 | -1.592908 | 1.146229  | C                   | 2.208172  | 1.499987  | 1.926961  | H                   | 1.051028  | -1.734592  | -0.950372 |
| H                   | -1.589089 | -0.201961 | 2.048727  | H                   | 3.016081  | 2.226879  | -0.516765 | H                   | 2.151734  | -0.576567  | -1.722446 |
| C                   | -2.929988 | -1.053408 | 0.644889  | H                   | 1.309706  | 2.599073  | 0.852017  | C                   | 2.915772  | -1.594600  | 0.044274  |
| O                   | -0.912237 | 2.622246  | 0.373230  | O                   | 2.453063  | -1.557853 | 0.533434  | O                   | 1.287883  | 2.512463   | -0.375843 |
| O                   | -3.914909 | -0.941871 | 1.334048  | O                   | 3.786145  | -0.107142 | -0.532150 | O                   | 2.965745  | -1.550325  | 1.259552  |
| O                   | -2.664066 | 1.535669  | -0.526715 | C                   | 4.821365  | -1.093292 | -0.515288 | N                   | 3.847752  | -2.243096  | -0.705083 |
| C                   | -3.384609 | 2.771837  | -0.558774 | H                   | 5.670246  | -0.637453 | -1.022715 | H                   | 4.519664  | -2.809873  | -0.213254 |
| H                   | -4.357531 | 2.532750  | -0.984695 | H                   | 5.082745  | -1.356227 | 0.512253  | H                   | 3.717139  | -2.402337  | -1.689237 |
| H                   | -3.495340 | 3.173166  | 0.450698  | H                   | 4.498082  | -1.994886 | -1.040361 | O                   | 3.094474  | 1.362348   | 0.299933  |
| H                   | -2.859381 | 3.501076  | -1.179231 |                     |           |           |           | C                   | 3.848099  | 2.576039   | 0.255590  |
| O                   | -2.937461 | -1.567213 | -0.593739 | 284                 |           |           |           | H                   | 4.859217  | 2.302631   | 0.552747  |
| C                   | -4.222004 | -1.950703 | -1.077953 | <sup>1</sup> ProArg |           |           |           | H                   | 3.840683  | 2.995473   | -0.753147 |
| H                   | -4.886291 | -1.084086 | -1.127770 | N                   | -4.529056 | -1.396786 | -0.764297 | H                   | 3.429008  | 3.309721   | 0.947718  |
| H                   | -4.054039 | -2.361278 | -2.072978 | C                   | -5.730477 | -1.152482 | 0.032538  |                     |           |            |           |
| H                   | -4.672503 | -2.701062 | -0.423998 | C                   | -3.660948 | -0.233724 | -0.693924 | 286                 |           |            |           |
| 282                 |           |           |           | H                   | -5.610904 | -1.447955 | 1.087612  | <sup>1</sup> ProCys |           |            |           |
| <sup>1</sup> ProGlu |           |           |           | H                   | -6.583053 | -1.705308 | -0.377722 | N                   | 3.637301  | -0.587758  | 0.746562  |
| N                   | 3.923679  | -1.619740 | 0.674159  | C                   | -5.907441 | 0.357255  | -0.063459 | C                   | 4.624294  | -0.123898  | -0.225936 |
| C                   | 5.104154  | -1.431887 | -0.165955 | C                   | -4.467393 | 0.845437  | 0.071359  | C                   | 2.459899  | 0.257694   | 0.669562  |
| C                   | 3.158477  | -0.386320 | 0.703851  | H                   | -3.437977 | 0.125907  | -1.712975 | H                   | 4.466481  | -0.543649  | -1.232839 |
| H                   | 4.903496  | -1.610624 | -1.235092 | C                   | -2.317154 | -0.470774 | -0.012801 | H                   | 5.635960  | -0.391529  | 0.098088  |
| H                   | 5.907867  | -2.108082 | 0.145624  | H                   | -6.569822 | 0.762229  | 0.706545  | C                   | 4.390347  | 1.379887   | -0.249662 |
| C                   | 5.446332  | 0.034409  | 0.058395  | C                   | -6.314244 | 0.626228  | -1.045543 | C                   | 2.864627  | 1.455844   | -0.230472 |
| C                   | 4.062896  | 0.681743  | 0.033758  | H                   | -4.172626 | 0.837177  | 1.126915  | H                   | 2.195440  | 0.620674   | 1.677181  |
| H                   | 2.955656  | -0.100048 | 1.749643  | H                   | -4.296264 | 1.852017  | -0.320334 | C                   | 1.210562  | -0.418183  | 0.112418  |
| C                   | 1.804421  | -0.446711 | 0.002916  | S                   | -2.059053 | -1.699358 | 1.081081  | H                   | 4.829173  | 1.870828   | -1.122486 |
| H                   | 6.119955  | 0.441152  | -0.700774 | H                   | -4.028655 | -2.218606 | -0.437839 | H                   | 4.809824  | 1.838171   | 0.652446  |
| H                   | 5.914021  | 0.163114  | 1.040554  | N                   | -1.394125 | 0.429174  | -0.354669 | H                   | 2.474915  | 1.299093   | -1.242613 |
| H                   | 3.744201  | 0.830149  | -1.004163 | H                   | -1.625555 | 1.163115  | -1.016972 | H                   | 2.469775  | 2.406565   | 0.138118  |
| H                   | 4.013660  | 1.648663  | 0.542080  | C                   | -0.060015 | 0.519441  | 0.195220  | S                   | 1.256754  | -1.800856  | -0.808948 |
| S                   | 1.423411  | -1.590528 | -1.144070 | C                   | -0.101421 | 0.263361  | 1.260144  | H                   | 3.380345  | -1.557228  | 0.584443  |
| H                   | 3.341819  | -2.380332 | 0.334784  | H                   | 0.905257  | -0.449368 | -0.516024 | N                   | 0.084766  | 0.236579   | 0.415620  |
| N                   | 0.973398  | 0.527996  | 0.380373  | C                   | 0.368629  | 1.964040  | 0.020872  | H                   | 0.128805  | 1.095370   | 0.956236  |
| H                   | 1.279353  | 1.223371  | 1.053394  | C                   | 0.393210  | -1.418438 | -0.530902 | C                   | -1.234803 | -0.096944  | -0.064767 |
| C                   | -0.335604 | 0.762091  | -0.183062 | H                   | 1.020795  | -0.126229 | -1.558648 | H                   | -1.173923 | -0.425941  | -1.108825 |
| H                   | -0.287830 | 0.564766  | -1.261412 | C                   | 2.266134  | -0.596676 | 0.152030  | C                   | -1.832986 | -1.239679  | 0.773576  |
| C                   | -1.397711 | -0.160606 | 0.448229  | O                   | -0.130383 | 2.717776  | -0.787219 | C                   | -2.061159 | 1.173904   | 0.039396  |
| C                   | -0.648232 | 2.226944  | 0.055357  | H                   | 2.812465  | 0.350159  | 0.147808  | H                   | -1.108904 | -2.055740  | 0.732131  |
| H                   | -0.926115 | -1.139778 | 0.568893  | H                   | 2.125851  | -0.892400 | 1.200963  | H                   | -1.947301 | -0.911180  | 1.810695  |
| H                   | -1.657106 | 0.191964  | 1.451741  | C                   | 3.124851  | -1.638705 | -0.561881 | S                   | -3.426409 | -1.843432  | 0.109326  |
| C                   | -2.648479 | -0.317594 | -0.401199 | H                   | 2.624905  | -2.614745 | -0.558441 | O                   | -1.724995 | 2.141961   | 0.686117  |
| O                   | -0.029792 | 2.935611  | 0.818443  | H                   | 3.267800  | -1.341008 | -1.604726 | H                   | -3.244522 | -3.118395  | 0.492456  |
| H                   | -3.104628 | 0.651369  | -0.634692 | N                   | 4.444313  | -1.814082 | 0.009599  | O                   | -3.197530 | 1.075498   | -0.638495 |
| H                   | -2.610899 | -0.780031 | -1.365884 | H                   | 4.459865  | -2.203033 | 0.941927  | C                   | -4.081013 | 2.195893   | -0.529049 |
| C                   | -3.690199 | -1.159009 | 0.290295  | C                   | 5.410472  | -0.852624 | -0.209828 | H                   | -4.955052 | 1.936868   | -1.123821 |
| O                   | -3.665985 | -1.493167 | 1.451540  | N                   | 5.189602  | 0.137223  | -0.993764 | H                   | -4.359184 | 2.360160   | 0.514125  |
| O                   | -1.699880 | 2.634965  | -0.655293 | N                   | 6.569553  | -1.107390 | 0.523823  | H                   | -3.600219 | 3.096018   | -0.918006 |
| C                   | -2.083156 | 3.998029  | -0.445617 | H                   | 6.041247  | 0.673635  | -1.142558 | 287                 |           |            |           |
| H                   | -2.946822 | 4.162116  | -1.088184 | H                   | 6.823088  | -2.085114 | 0.567735  | <sup>1</sup> ProPhe |           |            |           |
| H                   | -2.343522 | 4.165309  | 0.601816  | H                   | 7.353037  | -0.527303 | 0.264671  | N                   | 4.294400  | -1.037294  | 0.795785  |
| H                   | -1.266074 | 4.668591  | -0.720047 | O                   | 1.365755  | 2.294382  | 0.836600  | C                   | 5.335645  | -0.866599  | -0.214996 |
| O                   | -4.681251 | -1.486597 | -0.554794 | C                   | 1.880268  | 3.618045  | 0.664576  | C                   | 3.321360  | 0.031768   | 0.662596  |
| C                   | -5.723911 | -2.271482 | 0.020279  | H                   | 2.677719  | 3.719876  | 1.398908  | H                   | 5.071673  | -1.319084  | -1.184973 |















































|                     |           |           |           |                     |           |           |           |                                                                                                      |           |           |           |
|---------------------|-----------|-----------|-----------|---------------------|-----------|-----------|-----------|------------------------------------------------------------------------------------------------------|-----------|-----------|-----------|
| O                   | -0.983998 | -1.513111 | 0.254698  | N                   | 0.934413  | -0.835777 | 0.903125  | H                                                                                                    | 1.976071  | 1.978197  | -0.202600 |
| H                   | -1.600975 | -2.255462 | 0.359499  | C                   | 1.870301  | -1.077898 | -0.189111 |                                                                                                      |           |           |           |
| 12                  |           |           |           | C                   | 0.276341  | 0.433612  | 0.669389  | 19                                                                                                   |           |           |           |
| N <sup>-1</sup> Leu |           |           |           | H                   | 1.386109  | -1.454846 | -1.106200 | N <sup>-1</sup> Trp                                                                                  |           |           |           |
| N                   | -1.123801 | 1.995710  | -0.383884 | H                   | 2.631688  | -1.803872 | 0.114418  | N                                                                                                    | 2.903210  | 1.887423  | -0.653141 |
| C                   | -0.397101 | 0.755272  | -0.558142 | C                   | 2.436997  | 0.313800  | -0.432274 | C                                                                                                    | 1.791152  | 1.136831  | -0.109849 |
| H                   | -0.073459 | 0.562768  | -1.596937 | C                   | 1.187355  | 1.192230  | -0.340805 | H                                                                                                    | 1.126372  | 1.709286  | 0.559832  |
| C                   | 0.857401  | 0.819179  | 0.341839  | H                   | 0.195421  | 1.005643  | 1.606672  | C                                                                                                    | 0.945896  | 0.610669  | -1.297178 |
| C                   | -1.261036 | -0.429395 | -0.199893 | C                   | -1.136632 | 0.354467  | 0.137921  | C                                                                                                    | 2.273553  | -0.037133 | 0.709237  |
| H                   | 1.355780  | 1.767756  | 0.092908  | H                   | 2.950181  | 0.409609  | -1.392822 | H                                                                                                    | 0.630901  | 1.493698  | -1.870408 |
| H                   | 0.500891  | 0.262608  | 1.372701  | H                   | 3.143071  | 0.567416  | 0.364880  | H                                                                                                    | 1.629396  | 0.043965  | -1.937036 |
| C                   | 1.891803  | -0.304572 | 0.248317  | H                   | 0.695420  | 1.250920  | -1.317346 | C                                                                                                    | -0.243642 | -0.208632 | -0.928800 |
| H                   | 1.407679  | -1.248994 | 0.526437  | H                   | 1.387741  | 2.215106  | -0.015778 | C                                                                                                    | -0.360433 | -1.567712 | -1.053985 |
| C                   | 2.462497  | -0.465038 | -1.159095 | S                   | -1.935340 | -1.003554 | -0.320056 | C                                                                                                    | -1.482937 | 0.250205  | -0.361472 |
| C                   | 3.011049  | -0.037894 | 1.254108  | H                   | 0.256374  | -1.584188 | 1.006127  | H                                                                                                    | 0.354465  | -2.281015 | -1.441236 |
| H                   | 2.904589  | 0.475245  | -1.511747 | O                   | -1.680833 | 1.567245  | 0.090673  | N                                                                                                    | -1.589524 | -1.980226 | -0.598071 |
| H                   | 3.251075  | -1.224625 | -1.173095 | H                   | -2.580972 | 1.466290  | -0.257029 | C                                                                                                    | -2.304028 | -0.889346 | -0.170113 |
| H                   | 1.698422  | -0.773926 | -1.878226 | 16                  |           |           |           | C                                                                                                    | -1.983914 | 1.510422  | -0.004632 |
| H                   | 2.621803  | 0.054020  | 2.273431  | N <sup>-1</sup> Ser |           |           |           | H                                                                                                    | -1.924619 | -2.927298 | -0.611223 |
| H                   | 3.747180  | -0.848140 | 1.246400  | N                   | -0.440249 | 2.001351  | 0.446866  | C                                                                                                    | -3.591214 | -0.801461 | 0.361755  |
| H                   | 3.540068  | 0.892614  | 1.014724  | C                   | -0.640706 | 0.572035  | 0.539661  | C                                                                                                    | -3.260809 | 1.603577  | 0.523603  |
| S                   | -2.671532 | -0.408351 | 0.631101  | H                   | -1.054401 | 0.324535  | 1.523734  | H                                                                                                    | -1.380034 | 2.403659  | -0.142448 |
| H                   | -0.610864 | 2.752131  | -0.822772 | C                   | -1.665436 | 0.162365  | -0.518146 | H                                                                                                    | -4.207646 | -1.685138 | 0.501437  |
| H                   | -2.039505 | 1.943681  | -0.816315 | C                   | 0.616161  | -0.267013 | 0.363337  | C                                                                                                    | -4.055770 | 0.458083  | 0.705789  |
| O                   | -0.722134 | -1.557386 | -0.665058 | H                   | -2.582157 | 0.735365  | -0.320129 | H                                                                                                    | -3.658289 | 2.574894  | 0.802689  |
| H                   | -1.303146 | -2.281307 | -0.380275 | H                   | -1.275567 | 0.466542  | -1.502562 | H                                                                                                    | -5.053143 | 0.562140  | 1.122672  |
| 13                  |           |           |           | O                   | -1.861740 | -1.228583 | -0.434339 | S                                                                                                    | 3.598440  | -0.955918 | 0.417592  |
| N <sup>-1</sup> Lys |           |           |           | H                   | -2.417083 | -1.497767 | -1.170898 | H                                                                                                    | 2.553706  | 2.717405  | -1.119838 |
| N                   | 2.104148  | 1.943103  | 0.092086  | S                   | 1.778491  | 0.025942  | -0.759492 | H                                                                                                    | 3.530572  | 2.191247  | 0.083119  |
| C                   | 1.288430  | 0.833203  | 0.534232  | H                   | 0.101700  | 2.198790  | -0.391879 | O                                                                                                    | 1.438303  | -0.272013 | 1.715395  |
| H                   | 1.105321  | 0.804664  | 0.266008  | H                   | 0.121592  | 2.323188  | 1.227898  | H                                                                                                    | 1.753928  | -1.075451 | 2.160159  |
| C                   | -0.083476 | 0.940295  | -0.168144 | O                   | 0.662989  | -1.270481 | 1.224274  | 20                                                                                                   |           |           |           |
| C                   | 1.961009  | -0.483852 | 0.228967  | H                   | 1.461694  | -1.786997 | 1.029047  | N <sup>-1</sup> Val                                                                                  |           |           |           |
| H                   | -0.389805 | 1.989383  | -0.057742 | 17                  |           |           |           | N                                                                                                    | -0.213270 | 1.894409  | -0.539952 |
| H                   | 0.077274  | 0.787561  | -1.241559 | N <sup>-1</sup> Tyr |           |           |           | C                                                                                                    | 0.233993  | 0.528236  | -0.704356 |
| C                   | -1.200183 | 0.045032  | 0.353528  | N                   | 1.226801  | -1.392980 | -0.578993 | C                                                                                                    | 0.398712  | 0.236131  | -1.760885 |
| H                   | -0.947016 | -1.008536 | 0.192776  | C                   | 1.430358  | 0.019142  | -0.368334 | C                                                                                                    | 1.597906  | 0.363288  | 0.028981  |
| H                   | -1.293335 | 0.169782  | 1.441784  | H                   | 1.192929  | 0.648741  | -1.249828 | H                                                                                                    | 2.140604  | 1.277470  | -0.250746 |
| C                   | -2.537755 | 0.352099  | -0.312061 | C                   | 0.526263  | 0.509194  | 0.787756  | C                                                                                                    | 1.421344  | 0.380060  | 1.542653  |
| H                   | -2.802331 | 1.405339  | -0.134942 | C                   | 2.877069  | 0.339401  | -0.081652 | C                                                                                                    | 2.429700  | -0.822153 | -0.448229 |
| H                   | -2.459741 | 0.235612  | -1.399852 | H                   | 0.809732  | -0.054868 | 1.682280  | H                                                                                                    | 0.952361  | -0.546000 | 1.894621  |
| C                   | -3.669085 | -0.536062 | 0.185654  | H                   | 0.732418  | 1.566788  | 0.973468  | H                                                                                                    | 2.390423  | 0.469065  | 2.043444  |
| H                   | -3.416586 | -1.583540 | -0.023451 | C                   | -0.934527 | 0.310140  | 0.485926  | H                                                                                                    | 0.794353  | 1.224141  | 1.841574  |
| H                   | -3.735097 | -0.448901 | 1.286492  | C                   | -1.590819 | -0.874491 | 0.828357  | H                                                                                                    | 2.539996  | -0.824027 | -1.538483 |
| N                   | -4.908313 | -0.227571 | -0.514521 | C                   | -1.673339 | 1.297901  | -0.175369 | H                                                                                                    | 3.432873  | -0.771233 | -0.012637 |
| H                   | -5.645291 | -0.856197 | -0.212749 | H                   | -1.037184 | -1.659094 | 1.336917  | H                                                                                                    | 1.984075  | -1.775326 | -0.155277 |
| H                   | -5.215833 | 0.708254  | -0.266940 | C                   | -2.934424 | -1.069788 | 0.524322  | S                                                                                                    | -2.315847 | -0.072069 | 0.328323  |
| S                   | 3.273184  | -0.722487 | -0.721919 | C                   | -3.013875 | 1.118920  | -0.485371 | H                                                                                                    | -1.209188 | 1.973128  | -0.717702 |
| H                   | 3.074102  | 1.811324  | 0.356393  | H                   | -1.189016 | 2.233245  | -0.447315 | H                                                                                                    | 0.280576  | 2.498539  | -1.185943 |
| H                   | 1.771484  | 2.800642  | 0.517897  | H                   | -3.426240 | -1.999178 | 0.805495  | C                                                                                                    | -0.818570 | -0.444695 | -0.227636 |
| O                   | 1.346362  | -1.483805 | 0.860386  | C                   | -3.652367 | -0.071710 | -0.134404 | O                                                                                                    | -0.401950 | -1.703818 | -0.343263 |
| H                   | 1.810519  | -2.298162 | 0.607484  | H                   | -3.585181 | 1.890083  | -0.991831 | H                                                                                                    | -1.128991 | -2.267516 | -0.033843 |
| 14                  |           |           |           | O                   | -4.965136 | -0.198176 | -0.455839 | <b>XYZ coordinates of the 20 C-terminus amino acids optimized at PBE0/6-31G(d,p) level of theory</b> |           |           |           |
| N <sup>-1</sup> Met |           |           |           | H                   | -5.280021 | -1.055953 | -0.153282 |                                                                                                      |           |           |           |
| N                   | 1.813009  | 1.934242  | 0.229870  | S                   | 4.140944  | -0.700808 | -0.149511 |                                                                                                      |           |           |           |
| C                   | 1.048756  | 0.745803  | 0.532396  | H                   | 1.954445  | -1.773956 | -1.174412 | 1                                                                                                    |           |           |           |
| H                   | 0.833494  | 0.606300  | 1.611584  | H                   | 0.327949  | -1.541559 | -1.022808 | Asp-C                                                                                                |           |           |           |
| C                   | -0.306433 | 0.846256  | -0.204981 | O                   | 3.025045  | 1.630615  | 0.210621  | N                                                                                                    | 1.962550  | -2.040874 | -0.539787 |
| C                   | 1.815541  | -0.500034 | 0.152395  | H                   | 3.972161  | 1.777786  | 0.360807  | H                                                                                                    | 2.557376  | -1.914527 | 0.273790  |
| H                   | -0.620722 | 1.891983  | -0.105667 | 18                  |           |           |           | C                                                                                                    | 0.878122  | -1.090000 | -0.479128 |
| H                   | -0.139753 | 0.681133  | -1.274487 | N <sup>-1</sup> Thr |           |           |           | H                                                                                                    | 0.401319  | -0.997532 | -1.460758 |
| C                   | -1.417375 | -0.051904 | 0.320603  | N                   | -0.320043 | -1.587655 | -0.791557 | C                                                                                                    | -0.224648 | -1.437194 | 0.560025  |
| H                   | -1.196620 | -1.105394 | 0.133821  | C                   | -0.321144 | -0.149477 | -0.716969 | C                                                                                                    | 1.465098  | 0.257208  | -0.099036 |
| H                   | -1.534485 | 0.082337  | 1.403462  | H                   | -0.500412 | 0.258986  | -1.721565 | H                                                                                                    | -0.624868 | -2.424013 | 0.304972  |
| S                   | -2.978581 | 0.384909  | -0.503722 | C                   | -1.395237 | 0.475828  | 0.212176  | H                                                                                                    | 0.215813  | -1.472152 | 1.559493  |
| C                   | -4.061505 | -0.855173 | 0.241435  | C                   | 1.035078  | 0.374933  | -0.296209 | C                                                                                                    | -1.350009 | -0.435191 | 0.575836  |
| H                   | -4.120749 | -0.733946 | 1.326759  | H                   | -1.234463 | 1.564854  | 0.218229  | O                                                                                                    | 2.409129  | 0.395354  | 0.642440  |
| H                   | -5.058108 | -0.707630 | -0.180162 | C                   | -2.807460 | 0.186275  | -0.271524 | O                                                                                                    | -1.524969 | 0.408736  | 1.422540  |
| H                   | -3.728601 | -1.869288 | 0.003201  | O                   | -1.161512 | -0.075192 | 1.492880  | O                                                                                                    | 0.768451  | 1.265283  | -0.632163 |
| S                   | 3.331360  | -0.565435 | -0.464277 | H                   | -2.997970 | -0.891183 | -0.289369 | C                                                                                                    | 1.149681  | 2.566874  | -0.181898 |
| H                   | 1.455410  | 2.718694  | 0.762240  | H                   | -3.543039 | 0.641557  | 0.400847  | H                                                                                                    | 0.541954  | 3.267574  | -0.753116 |
| H                   | 2.792018  | 1.803638  | 0.461387  | H                   | -2.979556 | 0.594531  | -1.272659 | H                                                                                                    | 0.946160  | 2.668129  | 0.886651  |
| O                   | 1.106572  | -1.596860 | 0.416061  | H                   | -1.808439 | 0.293982  | 2.101386  | H                                                                                                    | 2.212396  | 2.739203  | -0.364277 |
| H                   | 1.656115  | -2.353907 | 0.157175  | S                   | 2.254837  | -0.479643 | 0.371911  | O                                                                                                    | -2.129078 | -0.573613 | -0.510312 |
| 15                  |           |           |           | H                   | -0.156217 | -1.967500 | 0.136062  | C                                                                                                    | -3.168168 | 0.395730  | -0.627342 |
| N <sup>-1</sup> Pro |           |           |           | H                   | -1.223475 | -1.919512 | -1.109364 |                                                                                                      |           |           |           |
|                     |           |           |           | O                   | 1.106887  | 1.688768  | -0.522318 |                                                                                                      |           |           |           |





|   |          |           |           |   |           |           |           |   |           |           |           |
|---|----------|-----------|-----------|---|-----------|-----------|-----------|---|-----------|-----------|-----------|
| H | 1.620620 | -1.624095 | -1.797929 | O | -1.277269 | -0.771674 | -0.281880 | H | -2.755391 | -0.774192 | 1.182670  |
| H | 2.387414 | -2.326558 | -0.367669 | C | -2.627604 | -0.998798 | 0.121127  | H | -3.311814 | -0.370663 | -0.454393 |
| H | 0.622684 | -2.239972 | -0.473869 | H | -2.820827 | -2.053352 | -0.072994 | H | 1.608226  | 2.416422  | -0.933965 |
